# Supplementary material for: Multiomics Analyses Reveal Dynamic Bioenergetic Pathways and Functional Remodeling of the Heart During Intermittent Fasting
Source: bioRxiv preprint, doi:10.1101/2021.03.04.433999, version 2 (2023-05-07)
Supplement: Supplementary Table 2 [file 433999_file21.xlsx]

## Sheet: Significantly Altered Proteins
Table S2 :IF-responsive differentially expressed proteins in heart tissues among different dietary groups
Protein Accession	Gene Name	Protein ID	Log2 TMT Ratio AL Rep Rep #1	Log2 TMT Ratio AL Rep #2	Log2 TMT Ratio AL Rep #3	Log2 TMT Ratio AL Rep #4	Log2 TMT Ratio IF12 Rep #1	Log2 TMT Ratio IF12 Rep #2	Log2 TMT Ratio IF12 Rep #3	Log2 TMT Ratio IF12 Rep #4	Log2 TMT Ratio IF12 Rep #5	Log2 TMT Ratio IF16 Rep #1	Log2 TMT Ratio IF16 Rep #2	Log2 TMT Ratio IF16 Rep #3	Log2 TMT Ratio IF16 Rep #4	Log2 TMT Ratio IF16 Rep #5	Log2 TMT Ratio IF24 Rep #1	Log2 TMT Ratio IF24 Rep #2	Log2 TMT Ratio IF24 Rep #3	Log2 TMT Ratio IF24 Rep #4	ANOVA p value	Dunnett adjusted pval IF12 vs AL	Dunnett adjusted pval IF16 vs AL	Dunnett adjusted pval EOD vs AL	Fold Change IF12 vs AL (log2)	Fold Change IF16 vs AL (log2)	Fold Change EOD vs AL (log2)	IF12 Significant	IF16 Significant	EOD Significant	Differentially Expressed Enzyme	Differentially Expressed Kinase	Differentially Expressed Phosphatase
Q9QXS1	PLEC	Q9QXS1_PLEC	-0.0262051	-0.027675	-0.0350469	-0.0335695	-0.112475	-0.204233	-0.169745	-0.169745	-0.125006	-0.187707	-0.179515	-0.234465	-0.194295	-0.16004	-0.128156	-0.207561	-0.204233	-0.192645	6.37862e-06	7.87467e-05	2.54523e-06	2.19799e-05	-0.139123	-0.157085	-0.167817	yes	yes	yes
P50544	ACADVL	P50544_ACADVL	-0.0365259	0.0243197	-0.0573917	0.0731347	-0.0232698	-0.215915	-0.150401	-0.0923402	-0.0409718	-0.118727	-0.161653	-0.174621	-0.0892673	-0.142417	-0.0923402	-0.158429	-0.176251	-0.07552	0.0158613	0.0436645	0.00879898	0.0217061	-0.0862371	-0.136314	-0.119281		yes
E9QQ96	OBSCN	E9QQ96_OBSCN	0.0172093	0.00288251	-0.011588	-0.0203404	0.0229004	-0.0203404	-0.00868224	-0.018878	-0.00868224	0.0384362	0.0496308	-0.013043	0.0172093	0.0100637	0.0690147	0.0524159	0.0786098	0.0813396	0.000124797	0.980272	0.193148	0.000265266	-0.0043295	0.021562	0.078165			yes
Q62261	SPTBN1	Q62261_SPTBN1	0.051024	0.0200577	0.0214797	0.00144197	0.0342157	0.0949116	0.0551957	0.0129262	0.0114956	0.0328061	0.0989585	-0.00144342	0.0313952	0.0496308	0.144046	0.10165	0.107018	0.0894981	0.00597209	0.700576	0.684007	0.00340545	0.013447	0.0120374	0.0835653			yes
Q9WUB3	PYGM	Q9WUB3_PYGM	0.0285692	0.0328061	-0.0203404	0.0200577	-0.0634092	-0.125006	-0.163268	-0.115597	-0.0954196	-0.136062	-0.139236	-0.248108	-0.231075	-0.158429	-0.131313	-0.248108	-0.332789	-0.246395	4.92576e-05	0.00737505	0.000234938	1.5497e-05	-0.13991	-0.182742	-0.271565	yes	yes	yes	Yes
Q60932	VDAC1	Q60932_VDAC1	-0.00723157	-0.00578235	-0.00723157	-0.0101344	-0.0619024	-0.131313	-0.115597	-0.0954196	-0.0969617	-0.117161	-0.150401	-0.139236	-0.123434	-0.0679388	-0.104697	-0.117161	-0.128156	-0.121863	1.03483e-05	8.3361e-05	6.79334e-06	2.9626e-05	-0.0897301	-0.116202	-0.11228	yes	yes	yes
P52480	PKM	P52480_PKM	-0.0291463	0.0271541	0.0086303	0.0342157	-0.0664274	-0.086201	-0.169745	-0.145605	-0.00578235	-0.0800879	-0.155213	-0.152003	-0.123434	-0.281036	-0.12658	-0.187707	-0.205896	-0.177882	0.00144535	0.0390451	0.00163813	0.00113648	-0.104093	-0.169895	-0.200687		yes	yes	Yes	Yes
O35459	ECH1	O35459_ECH1	-0.0174171	-0.00723157	-0.0543923	0.0690147	-0.0892673	-0.2567	-0.229382	-0.215915	-0.142417	-0.132894	-0.186065	-0.21424	-0.132894	-0.209228	-0.172994	-0.226004	-0.2567	-0.168123	0.000238983	0.000393473	0.000677116	0.000286718	-0.203591	-0.173741	-0.187175	yes	yes	yes	Yes
E9PZ16	HSPG2	E9PZ16_HSPG2	0.0342157	0.00144197	-0.00144342	0.00144197	0.0648829	0.0468403	0.0398403	0.0143553	-0.00578235	0.045443	0.0908534	-0.00144342	0.0538064	0.0538064	0.147958	0.0482362	0.113701	0.0786098	0.00919901	0.566349	0.187547	0.00384701	0.0383983	0.0523644	0.0947134			yes	Yes
P04117	FABP4	P04117_FABP4	0.0356239	0.0524159	-0.0232698	-0.0543923	0.0482362	0.0172093	0.0426443	0.00144197	0.00288251	0.0731347	0.0962619	0.00144197	0.0482362	-0.0409718	0.320773	0.163499	0.123004	0.164786	0.000951503	0.909262	0.71143	0.000869184	0.0110323	0.0420592	0.157965			yes
Q8CI94	PYGB	Q8CI94_PYGB	-0.0247367	0.00432161	-0.0908029	-0.0380063	-0.140826	-0.242977	-0.242977	-0.166503	-0.189351	-0.215915	-0.254978	-0.356606	-0.286304	-0.24127	-0.145605	-0.318326	-0.311148	-0.258425	0.000105538	0.00237352	6.70716e-05	0.000237495	-0.157979	-0.223606	-0.253415	yes	yes	yes	Yes
O09161	CASQ2	O09161_CASQ2	0.00144197	0.0186342	-0.018878	-0.00288828	0.0086303	-0.093879	-0.0619024	-0.0664274	0.0086303	-0.0877334	-0.0800879	-0.134477	-0.0664274	-0.0649175	-0.0424568	-0.0985055	-0.0694519	-0.0619024	0.00784241	0.182958	0.00334492	0.0248648	-0.0611792	-0.0793647	-0.064954		yes
Q7TQ48	SRL	Q7TQ48_SRL	-0.011588	-0.00433459	-0.0831412	0.00144197	0.00575927	-0.15682	-0.0846703	-0.12658	-0.0380063	-0.110916	-0.129734	-0.204233	-0.132894	-0.192645	0.0496308	-0.0513992	-0.0619024	-0.0724828	0.00825564	0.294657	0.00626354	0.98676	-0.076709	-0.124933	-0.0486895		yes
D3Z041	ACSL1	D3Z041_ACSL1	0.0129262	0.0398403	-0.0439433	0.0524159	-0.0573917	-0.164884	-0.07552	-0.0923402	-0.027675	0.00432161	-0.0954196	-0.0409718	-0.0247367	0.015783	-0.086201	-0.163268	-0.121863	-0.0831412	0.00449504	0.0135208	0.357543	0.00304988	-0.101903	-0.05112	-0.130415			yes	Yes
J3QQ13	TNNT2	J3QQ13_TNNT2	0.0299829	0.0551957	-0.0144996	0.102994	0.0840643	-0.011588	-0.00144342	-0.0528949	-0.0159576	0.0881416	0.0482362	0.0662614	0.0100637	-0.0985055	-0.222633	-0.0923402	-0.106249	-0.0543923	0.0104092	0.612269	0.924339	0.00675008	-0.0541773	0.0056469	-0.141884			yes
P62631	EEF1A2	P62631_EEF1A2	0.0100637	-0.0144996	-0.0380063	0.0370307	-0.0679388	-0.112475	-0.118727	-0.046921	-0.101598	-0.0439433	-0.136062	-0.0831412	-0.107803	-0.120294	-0.153607	-0.115597	-0.192645	-0.128156	0.000215408	0.00414486	0.00184778	9.65305e-05	-0.09938	-0.105585	-0.138664	yes	yes	yes
P52825	CPT2	P52825_CPT2	-0.00144342	-0.0335695	-0.0664274	0.0867838	-0.0892673	-0.463947	-0.246395	-0.184425	-0.163268	-0.261881	-0.354759	-0.318326	-0.305788	-0.236164	-0.305788	-0.422752	-0.312939	-0.236164	0.000942504	0.00720623	0.00102422	0.000754656	-0.166919	-0.288282	-0.291857	yes	yes	yes	Yes
E9QLJ0	CMYA5	E9QLJ0_CMYA5	-0.0144996	0.0356239	0.0100637	-0.00288828	0.0086303	-0.0484122	-0.077041	-0.00578235	-0.011588	-0.0335695	-0.0320936	-0.0439433	-0.0619024	-0.0877334	-0.0513992	-0.0740006	-0.0664274	-0.0619024	0.00580492	0.146443	0.00888797	0.00363525	-0.0151757	-0.047531	-0.0677526		yes	yes
P58281-2	OPA1	P58281-2_OPA1	0.0172093	0.0129262	-0.0203404	0.051024	-0.00288828	-0.110916	-0.07552	-0.123434	-0.0350469	-0.0619024	-0.107803	-0.104697	-0.0528949	-0.128156	-0.174621	-0.204233	-0.0985055	-0.0908029	0.00131722	0.0288663	0.00698756	0.000412722	-0.0905878	-0.119765	-0.151631		yes	yes
O88492	PLIN4	O88492_PLIN4	0.0172093	0.0468403	0.0129262	-0.0218044	-0.112475	-0.161653	-0.12658	-0.0892673	-0.103147	-0.0634092	-0.0603973	-0.101598	-0.0694519	-0.171368	-0.0394883	-0.140826	-0.147202	-0.121863	0.00075882	0.000539818	0.00305001	0.0012956	-0.127543	-0.0845197	-0.146412	yes	yes	yes
Q91ZA3	PCCA	Q91ZA3_PCCA	-0.0247367	0.0440443	-0.0232698	0.0328061	0.0129262	-0.161653	-0.117161	-0.027675	0.0086303	-0.137648	-0.145605	-0.194295	-0.155213	-0.147202	-0.16004	-0.163268	-0.174621	-0.125006	0.000367166	0.1512	0.000461818	0.000795593	-0.0324432	-0.15197	-0.166422		yes	yes	Yes
P14824	ANXA6	P14824_ANXA6	0.0129262	-0.00868224	0.0200577	0.0129262	-0.107803	-0.0908029	-0.101598	-0.118727	-0.150401	-0.0634092	-0.0499049	-0.182786	-0.136062	-0.210897	-0.0709665	-0.189351	-0.200913	-0.224317	0.00125705	0.00780444	0.00349771	0.000535049	-0.120729	-0.148988	-0.208058	yes	yes	yes
F8VPN4	AGL	F8VPN4_AGL	0.0426443	0.0086303	-0.0232698	0.0426443	-0.027675	-0.117161	-0.0923402	-0.172994	-0.101598	-0.046921	-0.0800879	-0.210897	-0.152003	-0.07552	-0.0785637	-0.224317	-0.254978	-0.179515	0.0024518	0.0239602	0.0143702	0.000764096	-0.127235	-0.105725	-0.227553			yes	Yes
P05201	GOT1	P05201_GOT1	0.0257376	0.0607392	-0.00723157	0.0114956	0.0143553	-0.046921	-0.0424568	-0.046921	0.00288251	0.0840643	0.051024	-0.00578235	-0.0232698	-0.0350469	-0.086201	-0.0694519	-0.148801	-0.112475	0.0010409	0.201758	0.973169	0.000927074	-0.0610734	-0.024399	-0.117955			yes	Yes
P47857-3	PFKM	P47857-3_PFKM	0.00144197	0.0100637	-0.0218044	-0.0218044	-0.14401	-0.161653	-0.192645	-0.147202	-0.132894	-0.147202	-0.186065	-0.268817	-0.215915	-0.215915	-0.155213	-0.258425	-0.2567	-0.244685	1.90899e-06	9.15788e-05	1.37979e-06	1.11632e-06	-0.137021	-0.205734	-0.240511	yes	yes	yes	Yes	Yes
Q2TPA8	HSDL2	Q2TPA8_HSDL2	-0.0649175	-0.0320936	-0.0908029	0.0717627	-0.0649175	-0.215915	-0.21927	-0.189351	-0.0985055	-0.155213	-0.164884	-0.248108	-0.202572	-0.136062	-0.115597	-0.187707	-0.16004	-0.120294	0.00846602	0.0132627	0.00413841	0.0323187	-0.140845	-0.116378	-0.0916614		yes		Yes
Q8CGC7	EPRS	Q8CGC7_EPRS	0.0200577	-0.0159576	0.0214797	0.0342157	-0.0664274	-0.0588937	-0.077041	-0.086201	-0.0558912	-0.00144342	-0.0619024	-0.07552	-0.109359	-0.139236	-0.109359	-0.190997	-0.150401	-0.194295	7.28997e-05	0.00882491	0.00448481	1.0855e-05	-0.0871961	-0.0962887	-0.191468	yes	yes	yes	Yes
Q99MR8	MCCC1	Q99MR8_MCCC1	-0.0424568	0.0384362	-0.027675	0.0229004	-0.0588937	-0.174621	-0.153607	-0.0831412	-0.0203404	-0.142417	-0.125006	-0.212568	-0.187707	-0.164884	-0.182786	-0.253257	-0.209228	-0.123434	0.000381745	0.0316645	0.000699757	0.000252698	-0.0807539	-0.162497	-0.19362		yes	yes	Yes
Q07417	ACADS	Q07417_ACADS	-0.00578235	-0.0101344	-0.0664274	0.0676387	-0.0528949	-0.217591	-0.172994	-0.155213	-0.0800879	-0.142417	-0.182786	-0.209228	-0.181149	-0.237864	-0.244685	-0.274041	-0.21424	-0.136062	0.000364308	0.00831352	0.000568308	0.000221345	-0.147255	-0.174828	-0.221504	yes	yes	yes	Yes
F8WIA1	CLIP1	F8WIA1_CLIP1	-0.00288828	0.0257376	-0.0335695	0.00144197	0.015783	-0.0664274	-0.0969617	-0.0394883	-0.0694519	-0.129734	-0.132894	-0.275786	-0.12658	-0.115597	-0.0232698	-0.0454314	-0.018878	0.0922074	0.00139533	0.389142	0.00172473	0.999348	-0.0657042	-0.129011	-0.0203507		yes
E9Q7L0	OGDHL	E9Q7L0_OGDHL	-0.00433459	-0.0174171	-0.0484122	0.121679	0.051024	-0.22095	-0.0954196	0	0.0384362	-0.125006	-0.26708	-0.153607	-0.210897	-0.14401	-0.356606	-0.226004	-0.226004	-0.129734	0.00360148	0.634916	0.0141565	0.0036721	0.0108758	-0.142731	-0.215128			yes	Yes
O08528	HK2	O08528_HK2	0.0243197	0.0143553	-0.0499049	0.0840643	-0.0724828	-0.1976	-0.145605	-0.239566	-0.100051	-0.128156	-0.177882	-0.205896	-0.195946	-0.176251	-0.249822	-0.260152	-0.21927	-0.205896	2.5169e-05	0.000420092	0.000105025	1.66736e-05	-0.164943	-0.19722	-0.253883	yes	yes	yes	Yes	Yes
Q9Z0X1	AIFM1	Q9Z0X1_AIFM1	-0.00578235	0	-0.0513992	-0.00723157	-0.115597	-0.145605	-0.120294	-0.15682	-0.0484122	-0.0679388	-0.0679388	-0.07552	-0.0603973	-0.158429	-0.0985055	-0.15682	-0.0877334	-0.0528949	0.0103972	0.00455908	0.0438048	0.0233236	-0.113787	-0.0614318	-0.0866125	yes
P17710	HK1	P17710_HK1	0.077243	-0.0350469	-0.0218044	0.0114956	-0.140826	-0.0232698	-0.107803	-0.117161	-0.103147	0.00144197	0.00288251	-0.0892673	-0.0320936	-0.0664274	0.0524159	0.0579701	0.0717627	0.0648829	0.000253881	0.00392402	0.260285	0.17819	-0.102649	-0.0269392	0.0665809	yes			Yes	Yes
P47934	CRAT	P47934_CRAT	-0.0528949	0.0271541	-0.0709665	0.0229004	-0.0306192	-0.212568	-0.164884	-0.0664274	-0.0694519	-0.14401	-0.177882	-0.254978	-0.186065	-0.100051	-0.134477	-0.184425	-0.212568	-0.0969617	0.0106533	0.106422	0.00544121	0.0161172	-0.0544547	-0.162885	-0.144454		yes		Yes
Q9JHI5	IVD	Q9JHI5_IVD	-0.0159576	0.0100637	-0.0679388	0.0384362	-0.018878	-0.226004	-0.181149	-0.0649175	-0.0709665	-0.189351	-0.207561	-0.215915	-0.1976	-0.164884	-0.222633	-0.281036	-0.21424	-0.0892673	0.00206899	0.0740241	0.00192064	0.00217263	-0.0680195	-0.194653	-0.21549		yes	yes	Yes
A0A1B0GSX0	LDHA	A0A1B0GSX0_LDHA	-0.00578235	-0.00868224	-0.0603973	0.137504	-0.0499049	-0.12658	-0.125006	-0.0335695	-0.125006	-0.0380063	-0.147202	-0.177882	-0.134477	-0.184425	-0.0846703	-0.15682	-0.265345	-0.209228	0.00574709	0.072927	0.011006	0.0027023	-0.117774	-0.13997	-0.175792			yes	Yes
Q00623	APOA1	Q00623_APOA1	0.0243197	-0.0499049	-0.0740006	-0.0350469	-0.300448	-0.14401	0.182692	-0.12658	-0.120294	-0.100051	-0.0694519	0.0384362	-0.153607	-0.224317	-0.494109	-0.224317	-0.430509	-0.569179	0.00266426	0.765993	0.765615	0.0018711	-0.0841041	-0.0575751	-0.419833			yes
P23953	CES1C	P23953_CES1C	-0.115597	-0.00723157	0.116365	-0.171368	-0.33825	-0.311148	0.0635029	-0.0291463	-0.00433459	-0.2567	-0.204233	-0.147202	-0.298673	-0.242977	-0.444184	-0.227692	-0.516636	-0.603841	0.00632421	0.732758	0.161893	0.00325026	0.032268	-0.181563	-0.418996			yes	Yes
P26443	GLUD1	P26443_GLUD1	-0.0499049	-0.0159576	-0.0800879	0.0313952	-0.0649175	-0.227692	-0.158429	-0.172994	-0.142417	-0.226004	-0.189351	-0.2567	-0.246395	-0.232769	-0.227692	-0.305788	-0.268817	-0.212568	2.03885e-05	0.00304779	3.19823e-05	2.65775e-05	-0.125498	-0.199838	-0.215323	yes	yes	yes	Yes
Q99MN9	PCCB	Q99MN9_PCCB	-0.00433459	0.0342157	-0.0454314	0.0579701	0.0398403	-0.212568	-0.101598	-0.112475	-0.0394883	-0.115597	-0.163268	-0.172994	-0.142417	-0.148801	-0.202572	-0.244685	-0.139236	-0.0954196	0.00470567	0.0973369	0.00576967	0.00328556	-0.116539	-0.163742	-0.185845		yes	yes	Yes
Q8CHT0	ALDH4A1	Q8CHT0_ALDH4A1	0	0.00575927	-0.0588937	0.015783	0.0468403	-0.101598	-0.106249	-0.0558912	-0.0203404	-0.100051	-0.128156	-0.161653	-0.14401	-0.131313	-0.215915	-0.261881	-0.148801	-0.112475	0.000646219	0.538634	0.00631215	0.000627362	-0.0587708	-0.134193	-0.185238		yes	yes	Yes
Q9D0F9	PGM1	Q9D0F9_PGM1	-0.0543923	-0.00144342	-0.0664274	0.0129262	-0.0877334	-0.128156	-0.16004	-0.0892673	-0.0954196	-0.0664274	-0.093879	-0.123434	-0.129734	-0.14401	-0.204233	-0.190997	-0.231075	-0.182786	1.97598e-05	0.00344631	0.00340644	5.39132e-06	-0.0675017	-0.0955161	-0.169697	yes	yes	yes	Yes
P06728	APOA4	P06728_APOA4	0.168642	-0.0954196	-0.0306192	-0.0203404	-0.411195	-0.260152	0.0731347	-0.403542	-0.279284	-0.210897	0.119024	-0.0724828	-0.2567	-0.475936	-0.643856	-0.428566	-0.516636	-0.599462	0.00378649	0.0958705	0.288117	0.00126797	-0.253804	-0.185417	-0.532569			yes
Q1XH17	TRIM72	Q1XH17_TRIM72	-0.0262051	-0.0603973	-0.0694519	0.0745054	-0.129734	-0.100051	-0.210897	-0.169745	-0.123434	-0.0558912	-0.107803	-0.158429	-0.261881	-0.204233	-0.231075	-0.210897	-0.204233	-0.207561	0.00241057	0.0148224	0.00872829	0.000901485	-0.0864328	-0.115128	-0.165928		yes	yes
E9Q8Q6	CCDC141	E9Q8Q6_CCDC141	-0.00723157	0.0384362	0.00575927	-0.018878	-0.0306192	-0.077041	-0.0664274	-0.013043	-0.0232698	-0.0740006	-0.0573917	-0.129734	-0.0954196	-0.134477	0.0370307	-0.0350469	-0.0350469	-0.0573917	0.00205902	0.117692	0.000869544	0.506888	-0.0298831	-0.0946834	-0.0343108		yes
P16332	MUT	P16332_MUT	-0.0174171	0.0299829	-0.0262051	0.0243197	-0.0484122	-0.131313	-0.148801	-0.121863	-0.0335695	-0.129734	-0.0985055	-0.189351	-0.093879	-0.15682	-0.131313	-0.231075	-0.0846703	-0.0816138	0.00431022	0.0245365	0.00293801	0.00477791	-0.125314	-0.133185	-0.111443		yes	yes	Yes
Q99KQ4	NAMPT	Q99KQ4_NAMPT	0.0229004	0.0579701	-0.0908029	0.0398403	-0.222633	-0.272297	-0.190997	-0.279284	-0.179515	-0.200913	-0.16004	-0.416962	-0.22095	-0.289827	-0.109359	-0.258425	-0.239566	-0.0816138	0.000961514	0.00148571	0.000514683	0.0154893	-0.254003	-0.25232	-0.205833	yes	yes		Yes
P63101	YWHAZ	P63101_YWHAZ	0.0551957	0.0200577	0.0662614	-0.0203404	0.0285692	0.215368	0.0579701	0.172488	0.100305	0.077243	0.0827026	0.051024	0.21661	0	0.173767	0.235114	0.240009	0.167358	0.0142518	0.167864	0.459201	0.00540902	0.0626783	0.0396163	0.166814			yes
A0A0G2JFH2	MAP4	A0A0G2JFH2_MAP4	-0.0740006	-0.0409718	-0.0573917	0.112367	-0.0159576	-0.0679388	-0.0816138	-0.103147	-0.0664274	-0.018878	-0.14401	-0.155213	-0.164884	-0.0800879	-0.186065	-0.166503	-0.226004	-0.145605	0.00643423	0.403265	0.0555322	0.00276599	-0.018757	-0.0948283	-0.127102			yes
Q8BL66	EEA1	Q8BL66_EEA1	0.00144197	0.0143553	-0.00433459	-0.0306192	-0.0558912	-0.046921	-0.0954196	0.0143553	-0.0350469	-0.07552	-0.0709665	-0.171368	-0.093879	-0.0954196	0.041243	0	-0.0350469	-0.00868224	0.002053	0.258602	0.00264025	0.996209	-0.0454747	-0.0924327	-0.00289481		yes
Q60936	COQ8A	Q60936_COQ8A	-0.0159576	0.0342157	-0.011588	0.0370307	0.0384362	-0.121863	-0.0619024	-0.0218044	-0.0159576	-0.0831412	-0.0709665	-0.164884	-0.115597	-0.0985055	-0.0969617	-0.077041	-0.0247367	-0.0218044	0.00937801	0.272811	0.0031739	0.115715	-0.0331183	-0.109819	-0.0622027		yes		Yes	Yes
P10493	NID1	P10493_NID1	0.041243	0.0257376	-0.0144996	-0.0159576	0.113701	0.0172093	0.0962619	0.0565835	0.00144197	0.0579701	0.0962619	0.00288251	0.0908534	-0.0218044	0.168642	0.0962619	0.0935602	0.134878	0.017119	0.275222	0.481552	0.00645844	0.0509645	0.0523511	0.109951			yes
Q11011	NPEPPS	Q11011_NPEPPS	0.0243197	-0.0679388	-0.00144342	-0.013043	-0.15682	-0.192645	-0.15682	-0.209228	-0.131313	-0.142417	-0.15682	-0.202572	-0.202572	-0.227692	-0.125006	-0.24127	-0.200913	-0.227692	2.68242e-05	0.000127084	3.87113e-05	4.97359e-05	-0.149577	-0.195329	-0.207059	yes	yes	yes	Yes
Q9R0H0-2	ACOX1	Q9R0H0-2_ACOX1	0.0384362	-0.0454314	-0.101598	0.23634	0.0786098	-0.164884	-0.129734	-0.251539	-0.0800879	-0.161653	-0.309359	-0.177882	-0.195946	-0.177882	-0.192645	-0.24127	-0.15682	-0.202572	0.0148687	0.131955	0.00943955	0.0160171	-0.126236	-0.174384	-0.194111		yes
P45376	AKR1B1	P45376_AKR1B1	-0.0380063	-0.0709665	-0.0831412	0.0186342	-0.0816138	-0.190997	-0.163268	-0.179515	-0.147202	-0.0513992	-0.142417	-0.139236	-0.139236	-0.200913	-0.205896	-0.232769	-0.177882	-0.153607	0.00253718	0.00745877	0.0237072	0.000973213	-0.108782	-0.0847496	-0.137403	yes		yes	Yes
P21614	GC	P21614_GC	0.138814	-0.0923402	-0.0816138	0.0114956	-0.365871	-0.360305	0.138814	-0.380822	-0.274041	-0.166503	-0.205896	-0.148801	-0.352916	-0.522841	-0.564905	-0.362158	-0.384584	-0.442222	0.0138604	0.0939289	0.0552636	0.00476172	-0.325246	-0.170837	-0.378344			yes
Q6ZQ73	CAND2	Q6ZQ73_CAND2	-0.00868224	-0.0232698	-0.0528949	-0.00288828	-0.0923402	-0.128156	-0.0831412	-0.199255	-0.0800879	-0.0846703	-0.137648	-0.131313	-0.177882	-0.100051	-0.16004	-0.202572	-0.132894	-0.192645	0.00049003	0.00589418	0.0026483	0.000214433	-0.0763642	-0.115337	-0.160366	yes	yes	yes
Q3ULD5	MCCC2	Q3ULD5_MCCC2	-0.0320936	0	-0.0558912	0.0607392	-0.0232698	-0.237864	-0.169745	-0.104697	-0.0513992	-0.132894	-0.166503	-0.21927	-0.166503	-0.172994	-0.265345	-0.314733	-0.232769	-0.110916	0.00240174	0.0717128	0.007442	0.000992034	-0.0886502	-0.150456	-0.23301		yes	yes	Yes
P07309	TTR	P07309_TTR	0.00432161	0.0949116	0.0328061	-0.00144342	-0.630394	-0.446148	-0.195946	-0.311148	-0.279284	-0.475936	-0.21424	-0.584241	-0.833927	-0.529073	-0.612637	-0.24127	-0.813499	-0.905088	0.00175003	0.0256246	0.00291789	0.000925153	-0.329712	-0.547637	-0.731632		yes	yes
P16045	LGALS1	P16045_LGALS1	-0.0350469	-0.0484122	-0.0247367	0.0299829	-0.136062	-0.187707	-0.169745	-0.181149	-0.202572	-0.0969617	-0.153607	-0.248108	-0.112475	-0.275786	-0.249822	-0.254978	-0.263612	-0.176251	0.000228407	0.00136817	0.00115026	0.00013421	-0.151257	-0.123715	-0.222508	yes	yes	yes
P97927	LAMA4	P97927_LAMA4	0.0758749	0.0100637	0.0881416	-0.0484122	0.0648829	0.159629	0.126973	0.134878	0.0086303	0.0468403	0.146655	0.0867838	0.140124	-0.00144342	0.260628	0.164786	0.201634	0.190299	0.00668683	0.238211	0.418939	0.00250943	0.0840037	0.0438145	0.152997			yes
Q8VDJ3	HDLBP	Q8VDJ3_HDLBP	-0.0291463	0.00288251	0.0370307	-0.0232698	-0.0785637	-0.0724828	-0.153607	-0.0439433	-0.0923402	-0.0908029	-0.0985055	-0.172994	-0.152003	-0.147202	-0.0320936	-0.128156	-0.161653	-0.212568	0.00451802	0.0462779	0.00329726	0.00456596	-0.0683701	-0.137008	-0.134711		yes	yes
Q9WTI7	MYO1C	Q9WTI7_MYO1C	-0.0247367	0.0100637	0.104337	-0.0454314	0.00144197	0.164786	0.172488	0.10165	0.10165	0.115033	0.153157	0.153157	0.171207	0.172488	0.299831	0.206643	0.230203	0.157044	0.000874106	0.0550364	0.00578851	0.000282752	0.108987	0.160493	0.225759		yes	yes
E9PZF0	GM20390	E9PZF0_GM20390	0.0313952	0.0384362	-0.0247367	0.145351	0.041243	-0.0619024	-0.0262051	0.00432161	-0.0588937	0.0551957	-0.00868224	-0.0908029	-0.0380063	-0.0724828	-0.107803	-0.0262051	-0.168123	-0.137648	0.0151133	0.231356	0.1473	0.00485181	-0.0611208	-0.072922	-0.157641			yes
Q8BW75	MAOB	Q8BW75_MAOB	0.0356239	0.0285692	0.129613	-0.046921	-0.327348	-0.179515	-0.172994	-0.182786	-0.121863	-0.21927	-0.1976	-0.279284	-0.244685	-0.145605	-0.164884	-0.254978	-0.360305	-0.33825	0.000123023	0.000802044	0.000360238	9.82053e-05	-0.211612	-0.251367	-0.328711	yes	yes	yes	Yes
Q9QYR9	ACOT2	Q9QYR9_ACOT2	0.0328061	0.0524159	-0.0499049	0.0114956	0.186501	0.0143553	0.0313952	0.077243	0.0731347	0.0840643	0.0257376	-0.00723157	0.0840643	0.0100637	0.258217	0.163499	0.172488	0.250962	0.000440998	0.198592	0.768336	0.000326483	0.0509838	0.00358675	0.189574			yes	Yes
O35855	BCAT2	O35855_BCAT2	0.0370307	0.0114956	-0.0679388	0.108357	-0.0101344	-0.177882	-0.100051	-0.0923402	-0.0439433	-0.0816138	-0.120294	-0.131313	-0.0846703	-0.0724828	-0.224317	-0.229382	-0.123434	-0.0159576	0.0215384	0.0838605	0.0493219	0.00880591	-0.116603	-0.108933	-0.198139			yes	Yes
A0A0R4J0S3	RTN4IP1	A0A0R4J0S3_RTN4IP1	0.0186342	0.0271541	-0.00433459	0.102994	0.0827026	-0.123434	-0.0908029	-0.0664274	0	-0.0846703	-0.129734	-0.14401	-0.200913	-0.107803	-0.194295	-0.176251	-0.148801	-0.112475	0.000728102	0.153926	0.00144348	0.000765726	-0.0893215	-0.152628	-0.18542		yes	yes
Q3U3J1	BCKDHA	Q3U3J1_BCKDHA	-0.0218044	0.0565835	-0.046921	0.0607392	-0.0320936	-0.147202	-0.118727	-0.112475	-0.0262051	-0.0649175	-0.101598	-0.132894	-0.101598	-0.189351	-0.222633	-0.318326	-0.226004	-0.177882	0.000132227	0.03742	0.00723028	2.57707e-05	-0.129865	-0.118988	-0.241708		yes	yes	Yes
E9QMK9	DGLUCY	E9QMK9_DGLUCY	-0.0350469	0.0129262	0.0172093	-0.0247367	-0.0679388	-0.182786	-0.106249	-0.0649175	-0.00578235	-0.0588937	-0.101598	-0.118727	-0.128156	-0.145605	-0.134477	-0.172994	-0.169745	-0.128156	0.00203266	0.0387998	0.00712151	0.000742299	-0.0620335	-0.112822	-0.146206		yes	yes	Yes
Q8K1M6-3	DNM1L	Q8K1M6-3_DNM1L	0.0468403	0.00288251	-0.0320936	0.0496308	-0.0380063	-0.100051	-0.103147	-0.139236	-0.0649175	-0.0218044	-0.0694519	-0.07552	-0.100051	-0.179515	-0.0800879	-0.110916	-0.131313	-0.14401	0.00307996	0.00693566	0.00697255	0.0018066	-0.124912	-0.100381	-0.145976	yes	yes	yes
Q9Z1E4	GYS1	Q9Z1E4_GYS1	-0.018878	0.0071955	-0.0380063	-0.0499049	-0.164884	-0.15682	-0.161653	-0.199255	-0.123434	-0.128156	-0.134477	-0.202572	-0.253257	-0.132894	-0.103147	-0.254978	-0.336428	-0.321928	0.000943649	0.0120729	0.00794932	0.000261897	-0.133211	-0.106035	-0.260011		yes	yes	Yes
P53395	DBT	P53395_DBT	0.0243197	0.0496308	-0.0528949	0.0662614	-0.0320936	-0.100051	-0.117161	-0.120294	-0.046921	-0.0513992	-0.0380063	-0.0969617	-0.0454314	-0.139236	-0.152003	-0.186065	-0.152003	-0.0484122	0.00363775	0.0157517	0.0271933	0.00124061	-0.137026	-0.0883744	-0.188978			yes	Yes
P28271	ACO1	P28271_ACO1	-0.00868224	-0.0394883	-0.0291463	0.0229004	-0.0923402	-0.0969617	-0.107803	-0.0558912	-0.0908029	-0.0573917	-0.0877334	-0.137648	-0.147202	-0.142417	-0.00723157	-0.0846703	-0.117161	-0.104697	0.00605109	0.0172682	0.00218887	0.0522756	-0.0734259	-0.118734	-0.0757694		yes		Yes
Q64514	TPP2	Q64514_TPP2	0.0257376	-0.013043	-0.011588	0.0384362	-0.0232698	-0.013043	-0.00868224	-0.0588937	0.0243197	-0.0424568	-0.128156	-0.011588	-0.0619024	-0.128156	-0.0877334	-0.115597	-0.0969617	-0.0785637	0.00210962	0.565519	0.00783483	0.00239643	-0.0201178	-0.0689772	-0.0994224		yes	yes	Yes
Q8BML9	QARS	Q8BML9_QARS	-0.0484122	-0.0291463	-0.0394883	-0.011588	-0.0892673	-0.123434	-0.115597	-0.0664274	-0.0816138	-0.0634092	-0.106249	-0.0785637	-0.140826	-0.158429	-0.0785637	-0.131313	-0.153607	-0.212568	0.00526883	0.0544809	0.0181037	0.00189457	-0.05495	-0.0719317	-0.108143			yes	Yes
Q3UH68	LIMCH1	Q3UH68_LIMCH1	-0.0831412	0.015783	-0.0543923	0.0299829	-0.00144342	-0.0969617	-0.181149	-0.077041	-0.0543923	-0.112475	-0.110916	-0.192645	-0.139236	-0.136062	-0.0709665	-0.0969617	-0.118727	-0.115597	0.0219793	0.196212	0.00761992	0.0907989	-0.0577363	-0.116757	-0.0869747		yes
P50247	AHCY	P50247_AHCY	0.0370307	0.0398403	0.0565835	-0.0262051	-0.109359	-0.046921	-0.0558912	0.0086303	0.00144197	-0.101598	-0.0634092	-0.106249	-0.104697	-0.128156	0.0881416	-0.00723157	-0.00433459	-0.0144996	0.000997094	0.0620363	0.000899746	0.956093	-0.0853565	-0.143132	-0.0442186		yes		Yes
P51660	HSD17B4	P51660_HSD17B4	0.0243197	-0.0454314	-0.0892673	0.113701	-0.0831412	-0.147202	-0.169745	-0.137648	-0.145605	-0.0908029	-0.1976	-0.137648	-0.142417	-0.134477	-0.176251	-0.22095	-0.166503	-0.171368	0.00076701	0.00319753	0.00238919	0.000430299	-0.135049	-0.127092	-0.163254	yes	yes	yes
P32020	SCP2	P32020_SCP2	-0.0218044	-0.0664274	-0.125006	0.164786	-0.093879	-0.323733	-0.289827	-0.24127	-0.195946	-0.145605	-0.293359	-0.217591	-0.209228	-0.244685	-0.362158	-0.373327	-0.307573	-0.288065	0.0006679	0.00445359	0.00529622	0.000277577	-0.197154	-0.173475	-0.29075	yes	yes	yes
Q922B2	DARS	Q922B2_DARS	-0.0232698	-0.00288828	-0.0232698	0.0100637	-0.0740006	-0.013043	-0.0603973	-0.0232698	-0.011588	-0.0603973	-0.0923402	-0.0543923	-0.118727	-0.137648	-0.109359	-0.093879	-0.148801	-0.15682	0.000189968	0.411842	0.00236387	0.000215801	-0.0101908	-0.0792612	-0.116001		yes	yes	Yes
F6RPJ9	IDE	F6RPJ9_IDE	-0.0424568	-0.0101344	0.0086303	-0.00288828	-0.147202	-0.140826	-0.137648	-0.0365259	-0.0679388	-0.212568	-0.22095	-0.222633	-0.236164	-0.181149	-0.0454314	-0.0846703	-0.236164	-0.194295	0.000414278	0.0416465	0.000160736	0.00920877	-0.131137	-0.214439	-0.132971		yes	yes
Q64433	HSPE1	Q64433_HSPE1	-0.0174171	0.0398403	-0.0306192	0.0426443	0.0813396	0.0935602	0.0271541	0.0908534	0.0172093	0.210389	0.207893	0.232661	0.112367	0.0690147	0.0579701	0.255803	0.115033	0.231432	0.00545955	0.469033	0.00626198	0.00977004	0.070128	0.196681	0.162021		yes	yes
A2AUC9	KLHL41	A2AUC9_KLHL41	-0.0232698	-0.0101344	-0.0144996	-0.00723157	-0.110916	-0.239566	-0.192645	-0.161653	-0.0923402	-0.134477	-0.265345	-0.236164	-0.212568	-0.246395	-0.161653	-0.242977	-0.212568	-0.164884	6.36842e-05	0.000944303	3.06707e-05	0.000231921	-0.149336	-0.223847	-0.176409	yes	yes	yes
Q922D8	MTHFD1	Q922D8_MTHFD1	-0.0800879	-0.0232698	0.0186342	0.0129262	-0.110916	-0.0558912	-0.0484122	-0.0320936	0.0257376	-0.182786	-0.189351	-0.125006	-0.107803	-0.153607	-0.0923402	-0.0846703	-0.186065	-0.174621	0.00127371	0.720738	0.00177126	0.00770268	-0.0432404	-0.148435	-0.128309		yes	yes	Yes
Q78IK4	APOOL	Q78IK4_APOOL	0.0731347	0.0690147	0.045443	0.0813396	0.0482362	-0.0499049	-0.0634092	-0.0247367	0.0426443	-0.0409718	-0.00868224	-0.137648	-0.0892673	0.077243	-0.142417	-0.0740006	-0.118727	-0.077041	0.00466704	0.128589	0.0275324	0.0016242	-0.0958114	-0.112046	-0.168959			yes
Q8K010	OPLAH	Q8K010_OPLAH	0.00288251	-0.0709665	-0.0394883	-0.0203404	-0.168123	-0.261881	-0.136062	-0.147202	-0.227692	-0.229382	-0.217591	-0.202572	-0.187707	-0.253257	-0.234465	-0.309359	-0.277534	-0.215915	7.18849e-06	0.000145167	1.94218e-05	4.40863e-06	-0.138209	-0.187677	-0.226085	yes	yes	yes	Yes
Q8R1Q8	DYNC1LI1	Q8R1Q8_DYNC1LI1	-0.0320936	-0.0740006	-0.018878	0.00575927	-0.0394883	-0.107803	-0.131313	-0.134477	-0.121863	-0.0816138	-0.134477	-0.152003	-0.131313	-0.195946	-0.0679388	-0.148801	-0.0877334	-0.0740006	0.00636357	0.0234079	0.00214316	0.0746245	-0.0963772	-0.108991	-0.0553812		yes
Q9Z1Q9	VARS	Q9Z1Q9_VARS	-0.0232698	0.0071955	0.0243197	0.0114956	-0.0262051	-0.100051	-0.07552	-0.0394883	-0.0306192	-0.0513992	-0.0908029	-0.0335695	-0.0985055	0.0243197	-0.0619024	-0.12658	-0.109359	-0.176251	0.00541524	0.100579	0.133628	0.00162287	-0.0488338	-0.0607448	-0.127315			yes	Yes
E9Q3X0	MVP	E9Q3X0_MVP	-0.00868224	-0.00288828	0.0384362	-0.0394883	-0.0262051	0.00432161	-0.0394883	0.0426443	-0.018878	-0.128156	-0.0892673	-0.139236	-0.0740006	-0.114035	0.0186342	0.0538064	-0.0232698	0.0229004	7.82829e-05	0.992653	0.000423432	0.642964	-0.0130927	-0.10825	0.0265526		yes
B9EHJ3	TJP1	B9EHJ3_TJP1	0.0129262	0.0129262	0.0200577	0.0071955	-0.0424568	-0.0877334	-0.0679388	-0.0144996	-0.077041	-0.0816138	-0.0619024	-0.147202	-0.086201	-0.134477	0.0299829	-0.0800879	-0.0543923	-0.103147	0.00348862	0.0306449	0.00104251	0.0627003	-0.080865	-0.0991272	-0.0801663		yes
Q924M7	MPI	Q924M7_MPI	0.0299829	-0.0218044	-0.0679388	0.0731347	-0.0247367	-0.118727	-0.0588937	-0.086201	-0.0424568	0.00288251	-0.120294	-0.0558912	-0.093879	-0.140826	-0.169745	-0.21927	-0.136062	-0.0694519	0.0123181	0.179041	0.0860291	0.00396346	-0.0629829	-0.0979683	-0.156993			yes
Q9EQH3	VPS35	Q9EQH3_VPS35	0.0731347	0.0129262	0.0482362	0.0482362	0.178874	0.204141	0.204141	0.16092	0.136191	0.185232	0.279768	0.134878	0.132248	0.222805	0.276199	0.194087	0.350497	0.226509	0.000229365	0.00422342	0.0017667	0.0001042	0.130638	0.136996	0.203118	yes	yes	yes
O88322	NID2	O88322_NID2	-0.00578235	-0.0603973	-0.00288828	-0.131313	0	0.0648829	0.0579701	0.0840643	-0.0513992	0.0313952	0.115033	0.0229004	0.0703893	-0.0350469	0.240009	0.133564	0.125651	0.0621217	0.00543965	0.156572	0.102978	0.00165492	0.0910599	0.064485	0.162697			yes
P48758	CBR1	P48758_CBR1	0.00288251	0.0100637	0.00288251	0.00575927	-0.0528949	0.0071955	-0.0394883	-0.0954196	0.00288251	-0.0454314	-0.0573917	-0.0877334	-0.152003	-0.145605	-0.0350469	-0.0679388	-0.0649175	-0.0603973	0.00531932	0.239523	0.0018488	0.063473	-0.0438092	-0.0920543	-0.0669783		yes		Yes
Q8BG32	PSMD11	Q8BG32_PSMD11	0.0621217	0.0342157	0.0676387	0.0799754	0.0214797	0.0676387	0.015783	0.0200577	0.0676387	0.0299829	-0.00723157	-0.0454314	-0.0424568	-0.07552	0	-0.0247367	-0.0291463	-0.0846703	0.00104175	0.597211	0.00260978	0.00234153	-0.0434005	-0.107337	-0.0918217		yes	yes	Yes
P97371	PSME1	P97371_PSME1	-0.086201	-0.00288828	0.0100637	0.107018	-0.100051	-0.0380063	-0.101598	-0.0513992	0.00432161	-0.077041	-0.0649175	-0.15682	-0.12658	-0.163268	-0.013043	-0.0439433	-0.0954196	-0.0846703	0.0273421	0.207277	0.00890958	0.221238	-0.0549869	-0.130168	-0.0678945		yes
Q8R5C5	ACTR1B	Q8R5C5_ACTR1B	0.051024	0.0328061	0.0100637	0.0200577	-0.011588	0.0299829	-0.0320936	0.00575927	-0.0409718	-0.0101344	-0.0335695	-0.0740006	-0.0439433	-0.0694519	0.0299829	0.00575927	-0.018878	0.00288251	0.00301405	0.0812933	0.00117945	0.397436	-0.0380199	-0.0703752	-0.022111		yes
A0A0G2JGS4	CAMK2D	A0A0G2JGS4_CAMK2D	-0.0247367	-0.0262051	0.00288251	-0.0262051	-0.0232698	-0.0365259	-0.046921	0.0200577	-0.0218044	-0.0908029	-0.0892673	-0.0954196	-0.112475	-0.0588937	-0.0203404	-0.0291463	-0.0513992	-0.046921	0.000201472	0.98973	0.000274233	0.423327	0.0022011	-0.065332	-0.0125628		yes		Yes	Yes
G3X914	CUL5	G3X914_CUL5	-0.0174171	0.0299829	0.0384362	-0.0174171	-0.0679388	-0.0320936	-0.077041	-0.027675	-0.0159576	-0.0484122	-0.0679388	-0.0800879	-0.0694519	-0.0709665	-0.0558912	-0.0846703	-0.0877334	-0.07552	0.000323925	0.0078692	0.000456782	0.000219593	-0.0383765	-0.0757348	-0.086378	yes	yes	yes
Q9CQZ5	NDUFA6	Q9CQZ5_NDUFA6	0.0229004	0.0662614	-0.0380063	0.102994	0.138814	-0.0846703	-0.0619024	-0.013043	0.0551957	0.0071955	-0.0320936	-0.0800879	-0.0232698	-0.0394883	-0.136062	-0.112475	-0.110916	-0.316528	0.00693281	0.856266	0.361941	0.00397849	-0.0576239	-0.0766745	-0.168849			yes	Yes
P61202	COPS2	P61202_COPS2	-0.0159576	0.0229004	0.0370307	0.0071955	-0.0306192	0.0100637	-0.0694519	0.0200577	0.00575927	-0.0528949	-0.0232698	-0.150401	-0.117161	-0.110916	-0.0499049	-0.0588937	-0.137648	-0.129734	0.00312022	0.678601	0.00580674	0.00697786	-0.00928868	-0.125964	-0.109362		yes	yes
Q8K009	ALDH1L2	Q8K009_ALDH1L2	-0.027675	-0.0350469	0.0786098	-0.0350469	-0.394032	-0.473931	-0.416962	-0.163268	-0.200913	-0.529073	-0.498179	-0.608232	-0.522841	-0.356606	-0.1976	-0.37707	-0.541618	-0.261881	0.000167454	0.0026353	4.81229e-05	0.00270232	-0.362671	-0.49148	-0.288115	yes	yes	yes	Yes
E9QB02	MARS	E9QB02_MARS	0.00575927	-0.0159576	0.0468403	0.0100637	-0.0484122	-0.0174171	-0.0785637	-0.0573917	-0.0380063	-0.011588	-0.0908029	-0.0424568	-0.104697	-0.0664274	-0.0603973	-0.077041	-0.174621	-0.239566	0.00453982	0.183499	0.0791463	0.00143303	-0.0563237	-0.0743389	-0.133742			yes	Yes
G5E895	AKR1B10	G5E895_AKR1B10	0.0370307	-0.00288828	0.00144197	0.0894981	-0.0664274	-0.281036	-0.217591	-0.093879	-0.115597	-0.155213	-0.179515	-0.336428	-0.237864	-0.161653	-0.222633	-0.210897	-0.246395	-0.109359	0.000780758	0.00481716	0.000464021	0.00141305	-0.134833	-0.198751	-0.236001	yes	yes	yes	Yes
Q9DCT8	CRIP2	Q9DCT8_CRIP2	0.00432161	0.015783	-0.0247367	-0.013043	-0.0664274	-0.186065	-0.136062	-0.0335695	-0.0619024	-0.018878	-0.0203404	-0.109359	-0.0892673	-0.125006	-0.140826	-0.155213	-0.148801	-0.0816138	0.0108108	0.0254674	0.108623	0.00446786	-0.0620667	-0.0849066	-0.140453			yes
Q8BVI4	QDPR	Q8BVI4_QDPR	-0.00288828	0.015783	-0.0558912	0.0299829	-0.00433459	-0.114035	-0.0634092	-0.093879	-0.0499049	-0.0306192	-0.0528949	-0.107803	-0.0908029	-0.137648	-0.15682	-0.163268	-0.123434	-0.0619024	0.00822981	0.11239	0.0328779	0.00290112	-0.0698566	-0.0972503	-0.146574			yes	Yes
Q8R1S0	COQ6	Q8R1S0_COQ6	0.0607392	0.144046	0.0676387	0.144046	0.145351	-0.0573917	0.0172093	-0.0232698	0.0922074	-0.00868224	-0.0232698	-0.118727	-0.0831412	-0.100051	-0.0908029	-0.0816138	-0.0724828	-0.106249	0.000611356	0.197622	0.00124728	0.000776357	-0.0886331	-0.188984	-0.192051		yes	yes	Yes
A0A0R4J023	AUH	A0A0R4J023_AUH	0.0071955	0.051024	-0.0291463	0.0758749	0.128293	-0.136062	-0.0513992	-0.0335695	0.0243197	-0.0603973	-0.093879	0.0214797	0.0313952	-0.106249	-0.14401	-0.182786	-0.176251	-0.077041	0.0217203	0.725418	0.361214	0.00996178	-0.0626793	-0.0895071	-0.18924			yes	Yes
A0A0R4J094	FAHD2A	A0A0R4J094_FAHD2A	-0.0262051	-0.00578235	-0.0306192	0.0468403	-0.0409718	-0.248108	-0.142417	-0.142417	-0.0985055	-0.168123	-0.237864	-0.26708	-0.281036	-0.231075	-0.298673	-0.341903	-0.288065	-0.226004	1.43616e-05	0.00779166	7.21333e-05	4.99021e-06	-0.126423	-0.22187	-0.277375	yes	yes	yes	Yes
Q9R0P5	DSTN	Q9R0P5_DSTN	0.0935602	0.0271541	0.0593553	-0.046921	-0.0634092	0.221568	0.205393	0.119024	0.0086303	0.248535	0.252173	0.23634	0.233888	0.00575927	0.334568	0.227741	0.379621	0.206643	0.0128899	0.643678	0.0704253	0.00741539	0.0757693	0.193085	0.2379			yes
P56375	ACYP2	P56375_ACYP2	-0.16004	-0.0573917	-0.0985055	-0.0831412	-0.164884	-0.272297	-0.330973	-0.155213	-0.117161	-0.174621	-0.217591	-0.300448	-0.179515	-0.16004	-0.234465	-0.246395	-0.378944	-0.260152	0.0164236	0.0768202	0.0820377	0.00559113	-0.0740607	-0.0886917	-0.16245			yes
P08226	APOE	P08226_APOE	0.144046	-0.200913	-0.109359	0.00432161	-0.668868	-0.321928	0.0143553	-0.72261	-0.608232	-0.360305	-0.556393	-0.533242	-0.550043	-0.982791	-0.619271	-0.724993	-0.680382	-0.841663	0.00363583	0.0329851	0.00573447	0.00190239	-0.555713	-0.497524	-0.650169		yes	yes
P70168	KPNB1	P70168_KPNB1	0.0398403	0.0229004	0.0285692	-0.0484122	0.0114956	0.102994	0.0799754	0.0745054	0.077243	0.0370307	0.0867838	0.0257376	0.0482362	0.0593553	0.0894981	0.129613	0.111031	0.0440443	0.0224789	0.0517783	0.207985	0.00951558	0.0515082	0.0225014	0.0745298			yes
Q99KK7	DPP3	Q99KK7_DPP3	0.0313952	-0.0513992	0.00432161	-0.00578235	-0.0499049	-0.00578235	-0.0232698	-0.0543923	-0.0365259	-0.131313	-0.187707	-0.0679388	-0.107803	-0.1976	-0.0424568	-0.0335695	0.0299829	-0.0619024	0.000635735	0.574167	0.000515264	0.773776	-0.0357955	-0.130583	-0.0372828		yes		Yes
P46935	NEDD4	P46935_NEDD4	0.0086303	-0.0159576	0.00575927	-0.0513992	-0.0454314	-0.0335695	-0.0558912	-0.109359	-0.0709665	-0.0558912	-0.0985055	-0.142417	-0.118727	-0.0923402	0.00432161	-0.07552	-0.00144342	-0.0785637	0.00981784	0.109318	0.00430108	0.610681	-0.050792	-0.0934063	-0.0333825		yes		Yes
A0A0R4J0P1	ACAD8	A0A0R4J0P1_ACAD8	0.0129262	0.0186342	-0.011588	0.0745054	0.0524159	-0.104697	-0.0380063	-0.0306192	0.0129262	-0.0262051	-0.077041	-0.114035	-0.155213	-0.0954196	-0.202572	-0.22095	-0.132894	-0.0365259	0.00407894	0.528536	0.0246875	0.00265057	-0.0463994	-0.1112	-0.183513			yes	Yes
Q9CZ30	OLA1	Q9CZ30_OLA1	0.0114956	-0.0218044	-0.0159576	0.00575927	-0.0954196	-0.0528949	-0.077041	-0.147202	-0.07552	-0.0543923	-0.077041	-0.0649175	-0.136062	-0.182786	-0.112475	-0.115597	-0.0634092	-0.07552	0.00743348	0.012356	0.00450077	0.0150673	-0.0719418	-0.0719418	-0.0888983		yes		Yes
P54822	ADSL	P54822_ADSL	-0.0424568	0.0313952	0.0229004	-0.00288828	-0.0846703	-0.018878	-0.0247367	-0.0350469	0.0356239	0.0100637	0.00575927	-0.0144996	-0.0454314	-0.100051	-0.0679388	-0.110916	-0.120294	-0.0954196	0.0137639	0.573635	0.492804	0.00597761	-0.0347428	-0.0245057	-0.113174			yes
Q8BY87	USP47	Q8BY87_USP47	-0.0439433	0.0143553	0.0114956	-0.0380063	-0.134477	-0.046921	-0.142417	-0.077041	-0.0619024	-0.086201	-0.104697	-0.181149	-0.166503	-0.128156	-0.0454314	-0.109359	-0.190997	-0.199255	0.00890926	0.0726288	0.00663415	0.00817621	-0.0637856	-0.114901	-0.136923		yes	yes	Yes
Q811U4	MFN1	Q811U4_MFN1	0.0257376	-0.00868224	-0.0320936	0.0328061	-0.114035	-0.07552	-0.0831412	-0.169745	-0.0588937	0.0867838	-0.0218044	-0.110916	-0.0484122	-0.00868224	-0.172994	-0.187707	-0.158429	-0.232769	0.000257128	0.0176235	0.785301	0.000193207	-0.0916689	-0.0303321	-0.188878			yes
Q9JLJ2	ALDH9A1	Q9JLJ2_ALDH9A1	0.0186342	-0.0291463	-0.0291463	-0.0320936	-0.0528949	-0.00144342	0.0129262	0.0257376	-0.018878	-0.00868224	-0.0203404	-0.0174171	0.0922074	-0.046921	0.0827026	0.0426443	0.107018	0.077243	0.00939651	0.941217	0.811041	0.00699063	0.0277029	0.0117292	0.109119			yes	Yes
Q60865	CAPRIN1	Q60865_CAPRIN1	0.00575927	0.0100637	0.00575927	0.0935602	0.0257376	-0.0619024	-0.107803	-0.0831412	-0.07552	0.0186342	-0.0923402	-0.100051	-0.0892673	-0.101598	-0.106249	-0.152003	-0.115597	-0.137648	0.00183951	0.0250005	0.0113212	0.00055549	-0.0834315	-0.100252	-0.134534			yes
Q3UI33	METAP2	Q3UI33_METAP2	-0.018878	-0.0335695	-0.0573917	-0.013043	-0.103147	-0.0785637	-0.161653	-0.0694519	-0.093879	-0.0262051	-0.0846703	-0.177882	-0.129734	-0.114035	-0.0908029	-0.172994	-0.217591	-0.199255	0.00589706	0.0841601	0.0615576	0.0017197	-0.0676553	-0.0878112	-0.159901			yes	Yes
Q9Z2U0	PSMA7	Q9Z2U0_PSMA7	0.0398403	0.0229004	0.0440443	0.0935602	0.0143553	0.0356239	-0.011588	-0.0439433	0.0200577	0.0356239	-0.027675	-0.0800879	-0.0394883	-0.07552	-0.0365259	-0.0954196	-0.0908029	-0.112475	0.00087862	0.171218	0.00784335	0.000431452	-0.027587	-0.0814306	-0.135054		yes	yes
Q91Z53	GRHPR	Q91Z53_GRHPR	0.045443	0.0100637	0.0214797	0.108357	0.041243	0.0129262	0.0214797	-0.018878	0.015783	0.0579701	-0.018878	-0.07552	-0.106249	-0.0335695	-0.112475	-0.0908029	-0.046921	-0.0573917	0.00532122	0.561754	0.0340029	0.00328171	-0.0176784	-0.0670309	-0.107559			yes	Yes
Q544X6	FECH	Q544X6_FECH	-0.0174171	0.0607392	-0.0528949	0.0257376	-0.0218044	-0.166503	-0.182786	-0.0409718	-0.106249	-0.21424	-0.134477	-0.316528	-0.270556	-0.0513992	-0.0954196	-0.134477	-0.174621	-0.0679388	0.0118856	0.1225	0.00361521	0.0917783	-0.110409	-0.2184	-0.119109		yes
Q9WVJ2	PSMD13	Q9WVJ2_PSMD13	-0.0203404	-0.0247367	0.00288251	0.0328061	-0.0306192	-0.0174171	-0.0306192	-0.0232698	0.0114956	-0.027675	-0.0439433	-0.120294	-0.134477	-0.0923402	-0.0558912	-0.109359	-0.103147	-0.148801	0.00141807	0.827018	0.00829022	0.00236497	-0.0145409	-0.0836113	-0.0975241		yes	yes	Yes
Q9DBF1	ALDH7A1	Q9DBF1_ALDH7A1	-0.0247367	0.0071955	0.0214797	-0.0320936	-0.21424	-0.0484122	-0.0985055	-0.117161	-0.118727	-0.093879	-0.0203404	-0.169745	-0.15682	-0.189351	-0.142417	-0.14401	-0.161653	-0.147202	0.00581274	0.0130715	0.00907376	0.0037835	-0.10839	-0.148049	-0.136835		yes	yes	Yes
O70571	PDK4	O70571_PDK4	0.120352	0.0976108	0.0384362	0.126973	0.847195	0.347099	0.601221	0.813114	0.650765	0.697774	0.145351	0.571434	0.54498	0.43189	1.26364	1.10769	1.38902	1.52507	1.08746e-06	0.000976337	0.0151698	5.72859e-08	0.541784	0.435999	1.21735	yes		yes	Yes	Yes
F8WIE5	HECTD1	F8WIE5_HECTD1	0.00144197	-0.046921	-0.0679388	-0.0424568	-0.0380063	-0.0664274	-0.046921	-0.0543923	-0.0588937	0.0186342	-0.0174171	0.0071955	-0.0588937	-0.0603973	0.041243	0.00144197	0.0731347	0.0731347	0.000959487	0.810229	0.719487	0.00249316	-0.0097034	0.0272718	0.101878			yes	Yes
Q99LB2	DHRS4	Q99LB2_DHRS4	-0.018878	-0.0144996	-0.0709665	0.0703893	-0.013043	-0.258425	-0.172994	-0.093879	-0.0619024	-0.137648	-0.182786	-0.244685	-0.187707	-0.153607	-0.145605	-0.212568	-0.205896	-0.027675	0.0227709	0.0986141	0.00938355	0.0456264	-0.0771902	-0.166097	-0.159062		yes		Yes
Q6P549	INPPL1	Q6P549_INPPL1	-0.0159576	-0.0908029	-0.0846703	0.0086303	-0.131313	-0.21927	-0.132894	-0.164884	-0.189351	-0.147202	-0.263612	-0.179515	-0.166503	-0.304006	-0.24127	-0.226004	-0.150401	-0.158429	0.00165246	0.00931411	0.000876783	0.00336322	-0.11457	-0.129201	-0.141903	yes	yes	yes	Yes		Yes
Q8QZR5	GPT	Q8QZR5_GPT	-0.00433459	-0.013043	-0.0573917	0.0935602	-0.093879	-0.176251	-0.14401	-0.186065	-0.103147	-0.0969617	-0.16004	-0.0877334	-0.192645	-0.242977	-0.253257	-0.316528	-0.300448	-0.279284	1.98038e-05	0.00285732	0.00116927	5.58331e-06	-0.135321	-0.151351	-0.281177	yes	yes	yes	Yes
Q8BUK6	HOOK3	Q8BUK6_HOOK3	0.015783	-0.0203404	-0.0513992	-0.0649175	-0.0709665	-0.131313	-0.112475	-0.0800879	-0.145605	-0.114035	-0.125006	-0.199255	-0.103147	-0.181149	0.0200577	-0.0709665	-0.106249	-0.0694519	0.00457228	0.0355047	0.0028908	0.692223	-0.0766052	-0.0891362	-0.0343394		yes
O70400	PDLIM1	O70400_PDLIM1	0.045443	0.0257376	0.0114956	0.0827026	0.155749	0.202888	0.100305	0.123004	0.0840643	0.176323	0.182692	0.132248	0.191563	0.0662614	0.138814	0.215368	0.257011	0.204141	0.00172601	0.025777	0.00921133	0.000539248	0.0874137	0.140733	0.174164		yes	yes
Q4VWZ5	DBI	Q4VWZ5_DBI	-0.0679388	0.0086303	0	-0.0394883	-0.150401	-0.207561	-0.192645	-0.153607	-0.184425	-0.155213	-0.15682	-0.253257	-0.231075	-0.270556	-0.0365259	-0.136062	-0.236164	-0.189351	0.000848571	0.00225571	0.000347093	0.0136682	-0.164681	-0.211331	-0.142962	yes	yes
Q8CGY8	OGT	Q8CGY8_OGT	-0.0174171	0.0538064	0.0524159	0.0271541	0.0243197	0.00288251	-0.0144996	0.00144197	0.041243	-0.0484122	-0.0513992	-0.123434	-0.0816138	-0.0380063	0.0496308	-0.0247367	-0.0439433	-0.0800879	0.00607767	0.80434	0.00382669	0.135854	-0.0369025	-0.0911842	-0.074125		yes		Yes
Q99L13	HIBADH	Q99L13_HIBADH	0.0579701	0.0186342	-0.0588937	0.16221	0.183963	0.045443	0.149259	0.0143553	0.0257376	0.27739	0.191563	0.266637	0.263034	0.0962619	0.191563	0.176323	0.312665	0.437228	0.00659877	0.857261	0.0330782	0.00728655	0.00714085	0.224732	0.213812			yes	Yes
Q06770	SERPINA6	Q06770_SERPINA6	-0.147202	0.041243	0.15056	-0.0954196	-0.405451	-0.426625	-0.114035	-0.07552	-0.0724828	-0.533242	-0.469929	-0.621488	-0.621488	-0.440263	-0.481968	-0.323733	-0.486004	-0.467932	0.000140589	0.0766307	0.000114675	0.000929139	-0.0869467	-0.506154	-0.447862		yes	yes
P40336-2	VPS26A	P40336-2_VPS26A	0.108357	0.0114956	0.0257376	0.0186342	0.159629	0.237564	0.194087	0.125651	0.163499	0.185232	0.292782	0.167358	0.153157	0.235114	0.253384	0.192825	0.348232	0.228973	0.000348685	0.00554004	0.00102631	0.000194172	0.141313	0.163046	0.218993	yes	yes	yes
Q9WVL0	GSTZ1	Q9WVL0_GSTZ1	0.0143553	0.0285692	0.0143553	0.0186342	0.0370307	-0.093879	-0.00433459	-0.0380063	-0.0101344	-0.0543923	-0.0424568	-0.0816138	-0.136062	-0.0831412	-0.0543923	-0.0877334	-0.0800879	-0.0144996	0.00589043	0.247858	0.00287483	0.0206945	-0.0266291	-0.0981086	-0.0837348		yes		Yes
Q9D0R2	TARS	Q9D0R2_TARS	0.0496308	0.0129262	0.0635029	0.0551957	-0.0144996	0.0143553	-0.00723157	0.0482362	0.00144197	0.0229004	-0.0740006	-0.0335695	-0.0649175	-0.0454314	-0.046921	-0.0877334	-0.0619024	-0.0892673	0.000172331	0.162818	0.00139105	0.000150874	-0.0509713	-0.0978447	-0.127231		yes	yes	Yes
O70435	PSMA3	O70435_PSMA3	0.015783	-0.0291463	0	0.0342157	-0.0335695	-0.027675	-0.0306192	-0.0144996	-0.0247367	-0.018878	-0.0985055	-0.0335695	-0.0619024	-0.110916	-0.0892673	-0.0892673	-0.0877334	-0.0877334	0.000472304	0.186743	0.0024733	0.000360269	-0.0355665	-0.0697939	-0.0963919		yes	yes
Q3UE92	XPNPEP1	Q3UE92_XPNPEP1	-0.00868224	-0.0144996	0.0786098	0.0172093	-0.0603973	-0.0144996	-0.0724828	-0.0218044	0.0285692	-0.0831412	-0.114035	-0.0785637	-0.086201	-0.046921	-0.0649175	-0.0543923	-0.0320936	-0.100051	0.00403485	0.150819	0.00185448	0.0128878	-0.0260679	-0.0874047	-0.0639184		yes		Yes
Q9WUR9	AK4	Q9WUR9_AK4	-0.0394883	-0.0306192	-0.26708	0.144046	-0.115597	-0.403542	-0.316528	-0.207561	-0.275786	-0.272297	-0.312939	-0.496142	-0.358454	-0.268817	-0.169745	-0.202572	-0.444184	-0.261881	0.0207917	0.0513132	0.00845941	0.0582842	-0.240732	-0.277885	-0.197173		yes		Yes	Yes
P29699	AHSG	P29699_AHSG	0.121679	0.0370307	0.0243197	-0.0846703	0.258217	0.133564	0.631337	0.113701	0.21661	0.535058	0.587845	0.706641	0.381837	0.140124	-0.0969617	0.121679	0.267835	0.0071955	0.00932826	0.147261	0.00672952	0.958226	0.185935	0.504383	0.0337621		yes
Q6P1F6	PPP2R2A	Q6P1F6_PPP2R2A	-0.00144342	0.0384362	-0.011588	0.0313952	-0.0831412	-0.0709665	-0.106249	-0.106249	-0.00288828	-0.00868224	-0.0908029	-0.0985055	-0.121863	-0.186065	-0.0679388	-0.140826	-0.168123	-0.0664274	0.00978506	0.0435726	0.00881535	0.00736031	-0.0981171	-0.113481	-0.119358		yes	yes	Yes		Yes
G5E8J6	HRC	G5E8J6_HRC	0.00288251	-0.0335695	-0.0320936	0.0299829	-0.07552	-0.272297	-0.248108	-0.182786	-0.166503	-0.0877334	-0.140826	-0.209228	-0.168123	-0.147202	-0.298673	-0.37707	-0.388355	-0.380822	2.45012e-06	0.000511375	0.00356277	1.97885e-07	-0.16818	-0.132596	-0.36434	yes	yes	yes
E9QKR0	GNB2	E9QKR0_GNB2	0.0524159	0.00432161	0.0071955	0.0271541	0.0243197	-0.00288828	0.0384362	0.0524159	-0.00433459	0.0551957	0.0398403	-0.011588	0.0745054	-0.0306192	0.107018	0.115033	0.141433	0.112367	0.0007133	0.99984	0.998134	0.00137164	0.0071449	0.0226655	0.0965252			yes
Q8R2Q4	GFM2	Q8R2Q4_GFM2	-0.0558912	0.0071955	-0.0484122	0.0299829	0.0299829	-0.139236	-0.137648	-0.0528949	-0.00144342	-0.137648	-0.123434	-0.217591	-0.184425	-0.0816138	-0.142417	-0.168123	-0.192645	-0.134477	0.00479217	0.514275	0.00789995	0.00681893	-0.0322865	-0.11704	-0.134662		yes	yes
P97372	PSME2	P97372_PSME2	-0.0664274	-0.00288828	-0.0101344	0.0935602	-0.109359	-0.00868224	-0.0528949	-0.112475	0.0100637	-0.0954196	-0.117161	-0.187707	-0.152003	-0.155213	-0.0174171	-0.0335695	-0.0846703	-0.134477	0.00904414	0.273674	0.00301399	0.181301	-0.0463836	-0.145492	-0.0526086		yes
Q60737	CSNK2A1	Q60737_CSNK2A1	0.0468403	0.00288251	-0.0306192	0.0328061	0.0129262	-0.0174171	-0.0291463	-0.0439433	-0.0543923	0.00144197	-0.0954196	-0.0831412	-0.086201	-0.0588937	-0.0144996	-0.0603973	-0.018878	0.00288251	0.0237266	0.204978	0.00786017	0.303608	-0.0469906	-0.100986	-0.0345331		yes			Yes
Q9D4H8	CUL2	Q9D4H8_CUL2	-0.018878	-0.013043	0.0243197	0.0172093	-0.0908029	-0.077041	-0.0664274	-0.0499049	-0.027675	-0.115597	-0.0634092	-0.172994	-0.174621	-0.07552	-0.07552	-0.121863	-0.14401	-0.169745	0.000570712	0.0535406	0.000701412	0.000598306	-0.0685106	-0.11768	-0.13502		yes	yes
Q99JB8	PACSIN3	Q99JB8_PACSIN3	0.0579701	0.0426443	0.0593553	-0.0174171	0.10165	0.15056	0.147958	0.157044	0.077243	0.126973	0.185232	0.0342157	0.0881416	0.204141	0.22033	0.196607	0.167358	0.197865	0.00225817	0.0267209	0.0254849	0.000626293	0.0976508	0.0766658	0.146929			yes	Yes	Yes
P63028	TPT1	P63028_TPT1	-0.0101344	0.0229004	0.0071955	0.0593553	0.0962619	0.10165	0.16092	0.0635029	0.0676387	0.238787	0.0881416	0.329985	0.221568	0.0690147	0.0676387	0.157044	0.176323	0.108357	0.0165763	0.238014	0.00567873	0.0981023	0.0812139	0.20652	0.117653		yes
Q149B8	PERM1	Q149B8_PERM1	0.00288251	0.0299829	-0.0159576	0.136191	0.0551957	-0.07552	-0.0694519	-0.134477	-0.00144342	-0.0291463	-0.0709665	-0.0969617	-0.093879	-0.0499049	-0.145605	-0.158429	-0.179515	-0.129734	0.00163858	0.085726	0.0258163	0.000452873	-0.0858846	-0.0873992	-0.16845			yes
P31750	AKT1	P31750_AKT1	0.0186342	0.00288251	0.0676387	-0.00578235	0.140124	0.16092	0.144046	0.112367	0.117695	0.146655	0.199123	0.0922074	0.0922074	0.0758749	0.293959	0.214125	0.22404	0.154454	0.000113082	0.00355574	0.0085158	4.45468e-05	0.129366	0.081449	0.208324	yes	yes	yes	Yes	Yes
P12382	PFKL	P12382_PFKL	0.0593553	-0.0394883	-0.0306192	0.0635029	-0.163268	-0.150401	-0.107803	-0.210897	-0.103147	-0.115597	-0.12658	-0.195946	-0.202572	-0.150401	-0.0603973	-0.204233	-0.172994	-0.244685	0.000807683	0.00190867	0.00101444	0.000930691	-0.164769	-0.164769	-0.202982	yes	yes	yes	Yes	Yes
Q921C5-2	BICD2	Q921C5-2_BICD2	0.00432161	0.0299829	0.0342157	0.0342157	-0.0603973	0.015783	-0.12658	0.00575927	0.00288251	-0.110916	-0.0724828	-0.152003	-0.112475	-0.152003	-0.00723157	0	-0.0679388	-0.101598	0.00186572	0.157635	0.000592021	0.0975572	-0.0292168	-0.144574	-0.0696845		yes
Q6P5H2	NES	Q6P5H2_NES	-0.0484122	-0.046921	-0.0203404	-0.018878	-0.0439433	-0.0588937	-0.112475	-0.0969617	-0.0709665	-0.0694519	-0.16004	-0.207561	-0.161653	-0.0969617	0.0328061	-0.103147	-0.0528949	-0.104697	0.0192449	0.375258	0.00954693	0.801516	-0.0373358	-0.126409	-0.0443903		yes
E9Q9J4	PPIP5K2	E9Q9J4_PPIP5K2	-0.018878	0.0579701	-0.0335695	0.0257376	-0.0573917	-0.120294	-0.0908029	-0.0923402	-0.0247367	-0.109359	-0.0649175	-0.172994	-0.129734	-0.129734	0.0129262	-0.117161	-0.161653	-0.121863	0.0104931	0.0552927	0.00428727	0.0243809	-0.0942327	-0.133164	-0.122942		yes		Yes	Yes
P61922	ABAT	P61922_ABAT	0.169925	-0.123434	0.0086303	0.0496308	-0.2567	-0.153607	-0.109359	-0.327348	-0.302226	-0.37146	-0.192645	-0.155213	-0.473931	-0.261881	-0.508403	-0.327348	-0.209228	-0.42082	0.00198726	0.0160669	0.00371406	0.000976733	-0.285831	-0.291012	-0.403215		yes	yes	Yes
E9PVZ8	GOLGB1	E9PVZ8_GOLGB1	-0.0335695	-0.0954196	0.0129262	-0.0831412	-0.0709665	0.0621217	0.045443	-0.0664274	-0.0394883	-0.0232698	-0.0247367	0.0229004	0.00288251	0.0676387	0.0703893	0.0299829	0.0949116	0.077243	0.0221381	0.542849	0.193994	0.00895382	0.0188671	0.0612379	0.132171			yes
Q8C129	LNPEP	Q8C129_LNPEP	0.102994	-0.013043	0.107018	-0.0247367	0.207893	0.350497	0.292782	0.144046	0.255803	0.295135	0.400538	0.201634	0.267835	0.624803	0.414677	0.318461	0.538041	0.418999	0.00135421	0.0376798	0.00239926	0.000742858	0.210828	0.250159	0.371863		yes	yes	Yes
Q6P5F9	XPO1	Q6P5F9_XPO1	0.0114956	0.00144197	0.077243	-0.0513992	-0.0232698	0.182692	0.0496308	0.104337	0.125651	0.0867838	0.121679	0.0299829	0.0745054	0.149259	0.221568	0.210389	0.168642	0.10165	0.0132683	0.165967	0.136035	0.00411158	0.0978682	0.080315	0.183047			yes
Q9Z2X1	HNRNPF	Q9Z2X1_HNRNPF	-0.0424568	-0.0439433	-0.0174171	-0.110916	-0.0306192	-0.0335695	-0.0543923	-0.0203404	-0.0499049	0.00575927	0.0100637	-0.07552	-0.018878	-0.0619024	0.0827026	0.051024	0.0538064	0.0086303	0.00212112	0.796506	0.507581	0.00136394	0.00963055	0.0243221	0.0956152			yes
F8VPM7	ERC1	F8VPM7_ERC1	-0.0740006	-0.0454314	-0.0694519	-0.0709665	-0.153607	-0.186065	-0.194295	-0.093879	-0.145605	-0.134477	-0.147202	-0.21927	-0.189351	-0.184425	-0.00433459	-0.121863	-0.132894	-0.14401	0.0057169	0.0157752	0.00393813	0.487395	-0.0833978	-0.114216	-0.0571693		yes
Q5H8C4	VPS13A	Q5H8C4_VPS13A	-0.0218044	-0.0291463	-0.0740006	-0.0499049	-0.147202	-0.0709665	-0.152003	-0.121863	-0.121863	-0.123434	-0.14401	-0.14401	-0.0634092	-0.168123	-0.123434	-0.117161	-0.0558912	-0.0800879	0.0075456	0.00775243	0.00475448	0.113441	-0.0823374	-0.104484	-0.0590989	yes	yes
Q3U3G8	SERHL	Q3U3G8_SERHL	0.0524159	0.0129262	-0.0528949	0.0648829	0.0229004	-0.137648	-0.0573917	-0.0454314	0.0100637	-0.0649175	-0.145605	-0.125006	-0.117161	-0.0694519	-0.202572	-0.169745	-0.121863	-0.0709665	0.00348834	0.246198	0.00976972	0.0021603	-0.0781024	-0.149832	-0.178475		yes	yes	Yes
P51881	SLC25A5	P51881_SLC25A5	-0.0291463	-0.0454314	0.0356239	0.0922074	0.155749	0.104337	0.0799754	0.0342157	0.14274	0.21661	0.250962	0.210389	0.166073	0.299831	0.182692	0.261832	0.360645	0.331132	5.47434e-05	0.100733	0.000293822	7.34735e-05	0.101098	0.213371	0.293243		yes	yes	Yes
Q8C3X4	GUF1	Q8C3X4_GUF1	-0.00723157	-0.07552	-0.0892673	0.0398403	-0.0724828	-0.131313	-0.148801	-0.284546	-0.172994	-0.0603973	-0.110916	-0.0954196	-0.212568	-0.237864	-0.251539	-0.258425	-0.182786	-0.26708	0.00581619	0.032145	0.0695868	0.00184599	-0.107425	-0.0695402	-0.213606			yes
Q91V64	ISOC1	Q91V64_ISOC1	0.0172093	0.00144197	-0.00288828	-0.077041	-0.0954196	-0.137648	-0.112475	-0.0174171	-0.0740006	-0.101598	-0.145605	-0.186065	-0.142417	-0.0831412	-0.0694519	-0.120294	-0.200913	-0.114035	0.00856993	0.0812124	0.00513491	0.0105498	-0.0946964	-0.141694	-0.116441		yes		Yes
D3Z316	1700021F05RIK	D3Z316_1700021F05RIK	-0.00288828	-0.0174171	-0.0649175	0.0799754	0.0285692	-0.195946	-0.109359	-0.0203404	-0.0439433	-0.0484122	-0.169745	-0.100051	-0.101598	-0.093879	-0.222633	-0.212568	-0.205896	-0.168123	0.00255799	0.262304	0.0599617	0.000923001	-0.0337906	-0.0898983	-0.199079			yes
Q03734	SERPINA3M	Q03734_SERPINA3M	0.105678	0.0384362	0.015783	-0.0159576	-0.249822	-0.33825	0.0840643	-0.174621	-0.164884	-0.0954196	-0.07552	-0.0877334	-0.120294	-0.481968	-0.463947	-0.446148	-0.473931	-0.599462	0.000522351	0.0872832	0.0812247	0.000132678	-0.201731	-0.122529	-0.496049			yes	Yes
Q9Z0P5	TWF2	Q9Z0P5_TWF2	0.0813396	-0.011588	0.0071955	0.0935602	0.212881	0.175045	0.146655	0.120352	0.116365	0.178874	0.0579701	0.104337	0.14274	-0.00578235	0.125651	0.282143	0.325386	0.290424	0.00234583	0.0563734	0.491113	0.0010536	0.102387	0.0600694	0.242016			yes
Q9DCS3	MECR	Q9DCS3_MECR	-0.0380063	0.041243	0.0593553	-0.0380063	0.0172093	0.051024	-0.013043	0.0086303	0.0607392	0.0243197	0.0703893	0.0482362	-0.07552	0.0129262	0.149259	0.140124	0.124328	0.0745054	0.0074166	0.857438	0.973132	0.00630067	0.015591	0.0227014	0.130608			yes	Yes
Q9D6Y7	MSRA	Q9D6Y7_MSRA	0.041243	0.0662614	0.0894981	0.112367	0.102994	0.0071955	-0.0232698	-0.0603973	0.0827026	-0.0144996	0.0100637	-0.104697	-0.0923402	-0.0831412	-0.104697	-0.0634092	-0.086201	-0.0831412	0.00107563	0.250445	0.00289514	0.0010262	-0.0706843	-0.161021	-0.162551		yes	yes	Yes
Q9CQ92	FIS1	Q9CQ92_FIS1	-0.0409718	-0.0499049	-0.0335695	0.0703893	-0.0365259	-0.277534	-0.177882	-0.179515	-0.168123	-0.103147	-0.150401	-0.202572	-0.140826	-0.184425	-0.289827	-0.302226	-0.192645	-0.107803	0.0057426	0.0147085	0.0238585	0.0024557	-0.140611	-0.11313	-0.203965			yes
Q05D44	EIF5B	Q05D44_EIF5B	0.0551957	0.0243197	0.0129262	0.0662614	-0.018878	0.0440443	-0.0603973	0	-0.0159576	0.0384362	0.00288251	-0.0619024	-0.0724828	-0.0218044	-0.0892673	-0.0394883	-0.0394883	-0.0649175	0.0124504	0.129704	0.0490802	0.00431918	-0.0557153	-0.0615621	-0.0919606			yes
P17183	ENO2	P17183_ENO2	0.0962619	0.0496308	0.0703893	0.0482362	-0.0877334	-0.0603973	-0.128156	-0.140826	-0.0664274	0.102994	0.0328061	-0.103147	-0.150401	-0.200913	-0.222633	-0.244685	-0.258425	-0.244685	0.000303709	0.0116409	0.0436845	6.65646e-05	-0.147743	-0.163157	-0.304695			yes	Yes
Q8CCJ3	UFL1	Q8CCJ3_UFL1	0.0426443	-0.0174171	0.0257376	0.0086303	-0.011588	0.0328061	0.0621217	0.0949116	0.0114956	0.0214797	0.0229004	0.0271541	0.041243	-0.0306192	0.0989585	0.0935602	0.235114	0.157044	0.00142109	0.749792	0.999874	0.00171325	0.0156221	0.00571645	0.110817			yes	Yes
Q99JB2	STOML2	Q99JB2_STOML2	-0.0439433	0.107018	0.0881416	-0.013043	0.0758749	0.129613	0.0468403	0.16221	0.107018	0.120352	0.225275	0.140124	0.129613	0.100305	0.337996	0.318461	0.180148	0.259423	0.000423084	0.226147	0.0400466	0.000192482	0.0694687	0.0920637	0.251393			yes
Q9D6T9	MRPS36	Q9D6T9_MRPS36	0.051024	0.0143553	0.0172093	0.0827026	0.0551957	-0.0649175	-0.0262051	-0.0740006	-0.0101344	0.0285692	0.0648829	-0.0694519	-0.0619024	-0.0588937	-0.121863	-0.155213	-0.0816138	-0.0424568	0.0126345	0.175141	0.21815	0.00399882	-0.0603217	-0.0930103	-0.135855			yes
A2AH85	EFTUD2	A2AH85_EFTUD2	0.0086303	-0.0203404	0.0271541	-0.0513992	-0.013043	-0.00433459	0.0172093	0.0676387	0.0143553	-0.00433459	0.0114956	-0.0499049	0.015783	-0.0262051	0.189034	0.0908534	0.0827026	0.0243197	0.00741114	0.690686	0.999839	0.00800865	0.0202104	0.00152046	0.092633			yes
Q6P069	SRI	Q6P069_SRI	0.0172093	-0.0144996	-0.0262051	-0.0694519	-0.0969617	0.0621217	0.0703893	0.0607392	0.0440443	-0.0144996	0.10165	0.0524159	0.0607392	0.015783	0.153157	0.146655	0.0922074	0.0703893	0.0140956	0.336044	0.16843	0.00482592	0.0810915	0.0727683	0.139784			yes
Q3TMX5	MANF	Q3TMX5_MANF	0.0214797	-0.0159576	0.0328061	0.0186342	0.0271541	0.175045	0.0745054	0.0962619	-0.0159576	0.117695	0.111031	0.164786	0.187768	-0.0101344	0.145351	0.243669	0.176323	0.187768	0.00749236	0.376643	0.0652113	0.0030207	0.0544484	0.097638	0.161989			yes
Q64010	CRK	Q64010_CRK	-0.0588937	-0.00288828	0	-0.0694519	-0.00578235	0.00432161	-0.0335695	0.0071955	-0.00288828	0.0482362	0.041243	-0.0291463	0.0370307	-0.0365259	0.0758749	0.0426443	0.0579701	0.0496308	0.00591355	0.422538	0.0991945	0.00231859	0.0280027	0.0679217	0.0846914			yes
Q9D880	TIMM50	Q9D880_TIMM50	0.0200577	0.051024	0.0384362	0.0086303	0.130931	0.121679	0.045443	0.0799754	0.0989585	0.129613	0.185232	0.0758749	0.0676387	0.123004	0.116365	0.0813396	0.171207	0.117695	0.0106185	0.0450479	0.00887816	0.00852195	0.0697116	0.0937571	0.0877831		yes	yes	Yes
Q8K1N1	PNPLA8	Q8K1N1_PNPLA8	0.0071955	0.00575927	0.00288251	0.0214797	-0.0831412	-0.103147	-0.0785637	-0.129734	-0.0846703	-0.0528949	-0.0439433	-0.0954196	-0.101598	0	0.0593553	-0.0144996	-0.0394883	-0.118727	0.0148328	0.00610571	0.0749782	0.463211	-0.0911477	-0.0593723	-0.0334713	yes
Q8R2G4	ART3	Q8R2G4_ART3	-0.07552	0.0229004	0.0786098	-0.107803	0.147958	0.123004	0.0579701	0.0758749	0.133564	0.146655	0.196607	0.151859	0.304511	0.547943	0.235114	0.240009	0.219091	0.211635	0.00362813	0.180389	0.00197968	0.00984623	0.149314	0.222917	0.253412		yes	yes	Yes
P52480-2	PKM	P52480-2_PKM	0.0482362	0.153157	0.212881	0.158337	0.0908534	0.0813396	0.0214797	-0.110916	0.119024	0.00144197	0.0384362	0.16221	0.045443	-0.148801	-0.226004	-0.215915	-0.103147	0.0551957	0.0207447	0.341618	0.217201	0.00710525	-0.0744074	-0.117311	-0.315278			yes	Yes	Yes
Q3TLP5	ECHDC2	Q3TLP5_ECHDC2	-0.00723157	0.0356239	-0.0603973	0.0172093	-0.137648	-0.341903	-0.32916	-0.246395	-0.152003	-0.364013	-0.475936	-0.444184	-0.37707	-0.325539	-0.345564	-0.454032	-0.432455	-0.209228	2.60729e-05	0.00199617	1.18943e-05	0.000101898	-0.251384	-0.382059	-0.393998	yes	yes	yes	Yes
Q62077	PLCG1	Q62077_PLCG1	0.0299829	0.0129262	0.0908534	0.0648829	0.0690147	0.0129262	0.0129262	0.015783	0.0565835	-0.0528949	-0.0335695	-0.0985055	-0.0740006	-0.0785637	-0.011588	-0.0174171	-0.0101344	-0.0380063	3.09401e-05	0.678294	3.02389e-05	0.00603838	-0.0316499	-0.121433	-0.0619355		yes	yes	Yes
P43883	PLIN2	P43883_PLIN2	0.0524159	0.0257376	-0.0694519	0.0299829	-0.298673	-0.655172	-0.691989	-0.360305	-0.481968	-0.793357	-0.778432	-0.943416	-0.865122	-0.558517	-0.1976	-0.614845	-0.275786	-0.0588937	3.73873e-05	0.00122633	1.09246e-05	0.0576437	-0.509828	-0.821217	-0.264553	yes	yes
Q8BGY7	FAM210A	Q8BGY7_FAM210A	0.117695	0.0989585	0.051024	0.168642	0.0565835	0.0243197	-0.0144996	-0.0203404	0.0717627	0.115033	0.0867838	0.00288251	0.00144197	0.0482362	0.0186342	-0.0203404	0.0342157	-0.0262051	0.0188925	0.0281039	0.154567	0.00964552	-0.084007	-0.0600905	-0.10918			yes
P60229	EIF3E	P60229_EIF3E	-0.0262051	0.0114956	-0.0262051	0.0229004	0.0071955	0.0114956	0.015783	0.0143553	-0.0247367	0.0482362	-0.018878	0.0100637	-0.018878	-0.027675	0.138814	0.0551957	0.0607392	0.0662614	0.0022003	0.927097	0.996841	0.00262219	0.0188504	-0.0115232	0.0708551			yes
P01898	H2-Q10	P01898_H2-Q10	-0.0394883	-0.128156	-0.0218044	0.177599	-0.655172	-0.305788	-0.0218044	-0.448115	-0.291592	-0.367732	-0.260152	-0.327348	-0.473931	-0.590745	-0.652901	-0.405451	-0.590745	-0.808437	0.00166556	0.0265437	0.00990735	0.000504933	-0.275142	-0.337086	-0.591177		yes	yes
E9Q3Y4	LRBA	E9Q3Y4_LRBA	-0.0709665	-0.0694519	-0.0365259	-0.0543923	-0.0365259	0.00575927	-0.018878	0.0342157	0.015783	-0.0603973	-0.027675	-0.0513992	-0.0320936	0.0703893	0.0717627	0.0384362	0.128293	0.0100637	0.00636291	0.118381	0.387679	0.00236019	0.0676814	0.0298285	0.117022			yes
O88543	COPS3	O88543_COPS3	0.0071955	0.00288251	0.045443	0.015783	-0.0800879	0.00288251	-0.0218044	-0.0724828	-0.00578235	0.0328061	-0.0291463	-0.0908029	-0.0816138	-0.0528949	-0.0619024	-0.0877334	-0.0831412	-0.110916	0.00936143	0.105117	0.0533461	0.00300039	-0.0332937	-0.0643842	-0.0969266			yes
Q8C7H1	MMAA	Q8C7H1_MMAA	-0.0558912	-0.0573917	-0.0232698	0.0745054	-0.0159576	-0.179515	-0.106249	-0.0800879	-0.0846703	-0.142417	-0.15682	-0.0846703	-0.147202	-0.152003	-0.181149	-0.199255	-0.125006	-0.140826	0.00357894	0.0737815	0.00571735	0.00202983	-0.0450898	-0.107621	-0.121407		yes	yes
P49722	PSMA2	P49722_PSMA2	-0.00723157	-0.00144342	-0.0144996	0.0356239	-0.0350469	-0.00433459	-0.0484122	-0.0664274	-0.046921	-0.0558912	-0.0454314	-0.123434	-0.0484122	-0.117161	-0.0634092	-0.110916	-0.0831412	-0.0908029	0.00132193	0.0855431	0.00181787	0.00113015	-0.0425835	-0.0515537	-0.0826346		yes	yes
Q9EQH2	ERAP1	Q9EQH2_ERAP1	-0.0694519	-0.0365259	0.0086303	-0.00723157	-0.0634092	-0.0320936	-0.0558912	-0.125006	-0.0454314	-0.0831412	-0.117161	-0.0877334	-0.137648	-0.101598	-0.0543923	-0.0846703	0.00575927	-0.0846703	0.0250829	0.256127	0.00946588	0.511202	-0.0340125	-0.0797193	-0.0476526		yes		Yes
P10630-2	EIF4A2	P10630-2_EIF4A2	0.0786098	0.0690147	0.0813396	0.0370307	0.0172093	0.0071955	-0.0694519	-0.0543923	-0.018878	0.0745054	-0.0247367	-0.0232698	-0.120294	-0.155213	-0.0247367	-0.0954196	-0.128156	-0.114035	0.0108362	0.0833315	0.0233539	0.00457161	-0.0926903	-0.0985489	-0.17854			yes
Q62318	TRIM28	Q62318_TRIM28	-0.027675	-0.0424568	-0.027675	-0.118727	-0.0528949	-0.0588937	-0.0800879	0.0854247	-0.077041	-0.0409718	-0.0499049	-0.132894	-0.0454314	-0.0649175	0.128293	0.0200577	0.126973	0.0731347	0.00297084	0.922221	0.966865	0.00518158	-0.0238278	-0.014839	0.13512			yes
Q8BVZ1	PLIN5	Q8BVZ1_PLIN5	0.0468403	-0.0679388	-0.150401	0.0243197	-0.168123	-0.442222	-0.386468	-0.270556	-0.289827	-0.330973	-0.479955	-0.426625	-0.426625	-0.405451	-0.187707	-0.365871	-0.351074	-0.204233	0.000156754	0.00107966	4.94764e-05	0.00458717	-0.268017	-0.404815	-0.255844	yes	yes	yes
Q8R010	AIMP2	Q8R010_AIMP2	0.0071955	-0.00578235	0.0143553	0.0935602	0.0328061	-0.0454314	-0.0320936	-0.0588937	-0.101598	0.0285692	-0.0954196	-0.0144996	-0.0664274	-0.140826	-0.168123	-0.182786	-0.086201	-0.104697	0.0063752	0.177482	0.0786602	0.0020002	-0.0562068	-0.0772028	-0.147185			yes	Yes
D3YZD8	AAMDC	D3YZD8_AAMDC	-0.0439433	0.0114956	-0.0335695	-0.046921	-0.118727	-0.0785637	-0.115597	-0.129734	-0.07552	-0.0203404	0.0172093	-0.0306192	-0.07552	-0.148801	-0.14401	-0.134477	-0.153607	-0.0969617	0.00832534	0.0360556	0.715853	0.00694652	-0.0768406	0.0081372	-0.100487			yes
O08797	SERPINB9	O08797_SERPINB9	-0.00868224	-0.0232698	0.0786098	-0.00578235	0.0172093	0.0894981	0.0690147	0.129613	0.0524159	0.0758749	0.0827026	-0.0203404	0.0621217	0.0243197	0.144046	0.185232	0.23634	0.167358	0.00029709	0.11834	0.48992	0.000186286	0.076247	0.069354	0.183527			yes
Q6XPS7	THA1	Q6XPS7_THA1	-0.0174171	0.0370307	-0.0439433	-0.00578235	0.0129262	-0.0409718	-0.0454314	0.0114956	0.0579701	0.00432161	-0.0603973	-0.0543923	-0.0573917	-0.0831412	-0.117161	-0.128156	-0.117161	-0.0499049	0.00416409	0.984797	0.235107	0.00656296	0.0230953	-0.045792	-0.105561			yes	Yes
Q8C7R4	UBA6	Q8C7R4_UBA6	0.0565835	-0.00723157	0.00144197	0.0214797	0.00144197	-0.0247367	-0.0262051	-0.00723157	-0.0694519	-0.0291463	-0.0528949	-0.0877334	-0.106249	-0.123434	0.0229004	-0.011588	0.0257376	-0.0365259	0.00200351	0.141955	0.00108726	0.757019	-0.0361975	-0.0991942	-0.00580463		yes
Q8K1H7	TCP11L2	Q8K1H7_TCP11L2	-0.0709665	0.102994	0.0621217	-0.0232698	0.302173	0.199123	0.24123	0.320773	0.427606	0.207893	0.351628	0.187768	0.328836	0.479231	0.551885	0.58111	0.474047	0.369606	7.29984e-05	0.00208187	0.00133736	3.08634e-05	0.282747	0.30941	0.49354	yes	yes	yes
P24472	GSTA4	P24472_GSTA4	0.0398403	-0.00723157	0.0214797	0.0100637	-0.0232698	-0.0543923	-0.0499049	-0.0800879	-0.0409718	-0.0649175	-0.0664274	-0.0785637	-0.118727	-0.136062	-0.103147	-0.0969617	-0.117161	-0.0394883	0.000160947	0.00812348	0.000148786	0.00023854	-0.0656766	-0.0943354	-0.115826	yes	yes	yes	Yes
Q8CIV8	TBCE	Q8CIV8_TBCE	-0.0394883	0.0621217	-0.018878	-0.0203404	0.0257376	-0.0101344	0.00288251	-0.011588	0.0229004	-0.0923402	-0.0543923	-0.129734	-0.0969617	-0.166503	0.0129262	-0.07552	-0.046921	0.0299829	0.00186847	0.961256	0.00408627	0.892356	0.0224917	-0.0773525	0.0026118		yes
E9PV66	MYO18B	E9PV66_MYO18B	-0.0394883	0.0100637	-0.00144342	0.0129262	-0.0218044	-0.0262051	-0.172994	-0.0800879	-0.0892673	0.0243197	-0.0892673	-0.0454314	-0.153607	-0.0740006	-0.177882	-0.212568	-0.265345	-0.314733	0.00023317	0.165893	0.258533	0.000132118	-0.084398	-0.0783107	-0.243267			yes
Q6ZWY3	RPS27L	Q6ZWY3_RPS27L	-0.0335695	-0.0694519	-0.0203404	0.0690147	0.0071955	-0.158429	-0.07552	-0.128156	-0.16004	0.0100637	-0.0985055	-0.0877334	-0.163268	-0.155213	-0.349235	-0.365871	-0.316528	-0.320126	1.68686e-05	0.107167	0.126989	1.00188e-05	-0.101201	-0.0715505	-0.307726			yes
H7BX95	SRSF1	H7BX95_SRSF1	-0.104697	-0.0499049	-0.0664274	-0.109359	0	-0.0306192	-0.0908029	0.0143553	-0.0679388	-0.0528949	-0.011588	-0.120294	0.0285692	0.0607392	0.197865	0.051024	0.0200577	0.0717627	0.00865881	0.497851	0.286275	0.00342593	0.054943	0.0739742	0.146956			yes
Q9EQI8	MRPL46	Q9EQI8_MRPL46	-0.0320936	0.0143553	-0.0380063	0.10165	0.0908534	0.0703893	-0.00868224	-0.0144996	0.0086303	0.0962619	0.0813396	-0.00288828	0.0328061	0.0271541	0.140124	0.0867838	0.129613	0.205393	0.0119786	0.90828	0.596164	0.00742193	0.0174994	0.0416752	0.143738			yes
A0A087WRM7	PFKFB2	A0A087WRM7_PFKFB2	-0.027675	0.00288251	-0.0101344	-0.0350469	-0.0262051	-0.0424568	-0.0969617	-0.0634092	-0.0262051	-0.00578235	-0.0424568	-0.107803	-0.15682	0.015783	-0.131313	-0.179515	-0.181149	-0.128156	0.00384185	0.545833	0.381074	0.00176381	-0.0235521	-0.0235521	-0.136509			yes	Yes	Yes
O54950	PRKAG1	O54950_PRKAG1	0	0.0243197	-0.0144996	0.0607392	-0.0218044	0	0.0299829	0.0384362	0.0229004	-0.0232698	-0.0306192	-0.0380063	-0.103147	-0.00433459	-0.150401	-0.109359	-0.0664274	-0.0969617	0.000234451	0.99612	0.0491356	0.000337947	0.0107406	-0.042779	-0.11532			yes	Yes	Yes
Q9JIY5	HTRA2	Q9JIY5_HTRA2	-0.0619024	0.045443	-0.011588	0.0172093	-0.00868224	-0.12658	-0.132894	-0.00288828	0.0086303	-0.0649175	-0.114035	-0.164884	-0.155213	-0.103147	-0.00723157	-0.0409718	-0.0679388	-0.0513992	0.0223439	0.341034	0.0088947	0.556306	-0.0114929	-0.116846	-0.0489962		yes
Q3U125	FAM213A	Q3U125_FAM213A	0.0468403	0.0200577	-0.027675	-0.0724828	0.0538064	0.145351	0.178874	0.0989585	0.0758749	0.215368	0.130931	0.22033	0.132248	0.123004	0.173767	0.113701	0.137504	0.111031	0.000574796	0.00570123	0.00023644	0.00208857	0.102767	0.136057	0.129411	yes	yes	yes
G3UXW9	GPS1	G3UXW9_GPS1	-0.018878	-0.0262051	-0.0291463	-0.0365259	-0.120294	-0.0203404	-0.0724828	-0.086201	-0.0649175	-0.0785637	-0.110916	-0.125006	-0.0558912	-0.131313	-0.0619024	-0.0954196	-0.115597	-0.0724828	0.0123611	0.078764	0.00502925	0.0282389	-0.0448071	-0.0832403	-0.0562755		yes
Q3UW66	MPST	Q3UW66_MPST	-0.107803	-0.0262051	0.0071955	-0.00433459	-0.00868224	-0.302226	-0.148801	-0.0603973	0.00144197	-0.205896	-0.277534	-0.26708	-0.234465	-0.16004	-0.1976	-0.300448	-0.209228	-0.222633	0.00509892	0.416405	0.00607607	0.00792813	-0.0451275	-0.219195	-0.200661		yes	yes	Yes
Q3UZG4	AIMP1	Q3UZG4_AIMP1	-0.00288828	-0.0350469	-0.00144342	0.0313952	0.0143553	-0.0709665	0.0482362	-0.152003	-0.129734	-0.0394883	-0.0831412	-0.101598	-0.118727	-0.176251	-0.115597	-0.174621	-0.194295	-0.131313	0.0134762	0.362489	0.049611	0.00617314	-0.0688007	-0.0994321	-0.150801			yes
P10518	ALAD	P10518_ALAD	0.051024	-0.00723157	-0.0144996	0.0621217	-0.137648	-0.174621	-0.106249	-0.186065	-0.0709665	-0.0424568	-0.182786	-0.114035	-0.181149	-0.286304	-0.33825	-0.42082	-0.268817	-0.236164	7.89202e-05	0.0108196	0.00369755	1.238e-05	-0.159544	-0.203045	-0.32543		yes	yes	Yes
Q9Z1R9	PRSS1	Q9Z1R9_PRSS1	0.0717627	0.132248	-0.00433459	-0.209228	-0.286304	-0.137648	-0.260152	-0.128156	-0.0499049	0.0299829	0.0840643	0.0271541	-0.258425	-0.37146	-0.595097	-0.522841	-0.434403	-0.314733	0.00358802	0.250966	0.66169	0.00174981	-0.171362	-0.00655995	-0.512336			yes
Q6NZD2	SNX1	Q6NZD2_SNX1	0.0356239	-0.027675	0.0172093	-0.0709665	-0.0101344	0.105678	0.0524159	0.0894981	0.100305	0.0143553	0.0758749	-0.0664274	0.0271541	-0.0499049	0.195348	0.119024	0.157044	0.0635029	0.00477006	0.102994	0.974332	0.00446581	0.0947309	0.0195881	0.143267			yes
Q8VHK1	CASKIN2	Q8VHK1_CASKIN2	0.00432161	-0.0558912	-0.12658	-0.0484122	0.0100637	0.00288251	0	0.0962619	-0.107803	0.0186342	0.00144197	-0.0499049	-0.0291463	0.0100637	0.077243	0.0662614	0.140124	0.111031	0.00524017	0.261125	0.39998	0.00199239	0.0550342	0.0535937	0.146289			yes
Q8R3V5	SH3GLB2	Q8R3V5_SH3GLB2	-0.018878	-0.0740006	-0.0439433	0.0271541	-0.0380063	-0.0969617	-0.0969617	-0.0800879	-0.0954196	-0.115597	-0.104697	-0.222633	-0.153607	-0.168123	0.00432161	-0.0831412	-0.0558912	-0.0439433	0.00109883	0.130993	0.000715989	0.857504	-0.0640089	-0.122196	-0.0185066		yes
Q9JLN9	MTOR	Q9JLN9_MTOR	-0.00578235	-0.0394883	-0.0439433	0.00575927	0.0690147	0.0186342	0.0593553	0	-0.018878	0.0243197	0.0229004	0.0086303	0.0071955	0.0745054	0.0908534	0.0172093	0.0690147	0.045443	0.0263946	0.102334	0.0865393	0.00963564	0.0412695	0.0455357	0.0798642			yes		Yes
P99026	PSMB4	P99026_PSMB4	-0.00723157	0.0114956	-0.0144996	0.0398403	-0.086201	0	-0.093879	-0.0424568	-0.013043	-0.0350469	-0.0484122	-0.103147	-0.109359	-0.0877334	-0.100051	-0.0877334	-0.103147	-0.107803	0.00138651	0.0503887	0.00332214	0.000660654	-0.0445888	-0.0898654	-0.103731		yes	yes
Q9QZ88-2	VPS29	Q9QZ88-2_VPS29	0.0607392	-0.0320936	0.0214797	-0.0306192	0.146655	0.169925	0.0813396	0.175045	0.136191	0.197865	0.305679	0.129613	0.128293	0.194087	0.250962	0.273814	0.375178	0.352759	1.8251e-05	0.00657501	0.000602214	2.14639e-06	0.151225	0.198657	0.317856	yes	yes	yes
P52196	TST	P52196_TST	-0.0694519	0.00288251	0.0867838	0.0440443	-0.311148	-0.248108	-0.270556	-0.24127	-0.131313	-0.263612	-0.145605	-0.305788	-0.39973	-0.33825	-0.145605	-0.395929	-0.351074	-0.253257	0.00039392	0.0016511	0.000325312	0.000637033	-0.271571	-0.329251	-0.325629	yes	yes	yes	Yes
Q8K3K8	OPTN	Q8K3K8_OPTN	-0.0439433	0.00144197	-0.0954196	0.015783	-0.121863	-0.018878	-0.142417	-0.150401	-0.0740006	-0.182786	-0.0724828	-0.281036	-0.15682	-0.205896	-0.112475	-0.077041	-0.0954196	-0.0499049	0.0109796	0.1882	0.00391898	0.422435	-0.100612	-0.161535	-0.0649796		yes
Q8VCG1	DUT	Q8VCG1_DUT	-0.00868224	0.0482362	-0.0144996	0.015783	-0.077041	-0.137648	-0.0831412	-0.0101344	0.00288251	-0.0877334	-0.142417	-0.184425	-0.0634092	-0.086201	-0.123434	-0.168123	-0.136062	-0.0800879	0.00298357	0.0878067	0.00358372	0.00230679	-0.0805914	-0.0912838	-0.133298		yes	yes	Yes		Yes
Q9CZX8	RPS19	Q9CZX8_RPS19	-0.0499049	-0.0603973	-0.0232698	0.0908534	-0.00433459	-0.0619024	-0.132894	-0.100051	-0.011588	-0.013043	-0.0174171	-0.0380063	-0.0846703	0.00575927	-0.15682	-0.136062	-0.155213	-0.212568	0.00264855	0.315974	0.892885	0.00175489	-0.025315	0.0191703	-0.119429			yes
Q61239	FNTA	Q61239_FNTA	0.0342157	0.0172093	0.0593553	0.0086303	-0.0247367	0.0271541	-0.046921	-0.0380063	0.0214797	-0.0528949	-0.0262051	-0.0543923	-0.0454314	-0.15682	0.0398403	-0.0573917	-0.013043	-0.0679388	0.0264371	0.327082	0.0092612	0.191129	-0.0504492	-0.0786074	-0.0609298		yes		Yes
Q9EPB4	PYCARD	Q9EPB4_PYCARD	0.0313952	0.0703893	0.0676387	-0.0335695	-0.011588	0.172488	0.0524159	0.0731347	0.0881416	0.10165	0.147958	0.0186342	0.168642	-0.00433459	0.215368	0.289244	0.154454	0.212881	0.00641747	0.658379	0.485224	0.00316245	0.0236177	0.0521331	0.164608			yes
K3W4M4	NAXD	K3W4M4_NAXD	0.0593553	0.0524159	0.0143553	0.0989585	0.119024	-0.0320936	-0.00144342	-0.0262051	0.0496308	-0.0101344	-0.0484122	-0.0969617	-0.0664274	-0.0649175	-0.0365259	-0.0603973	-0.0101344	0.0538064	0.0159661	0.565269	0.00739321	0.128703	-0.057329	-0.120803	-0.0792158		yes
Q9DBM2	EHHADH	Q9DBM2_EHHADH	0.0257376	0.0271541	-0.0232698	0.0854247	0.181421	0.102994	0.0496308	0.0565835	0.128293	0.0676387	0.0186342	0.182692	0.0949116	0.0172093	0.282143	0.108357	0.325386	0.228973	0.00382681	0.258822	0.590024	0.00174153	0.0765482	0.0411928	0.229112			yes
B1AR13	CISD3	B1AR13_CISD3	0.107018	0.0129262	-0.013043	0.0648829	-0.0785637	-0.145605	-0.109359	-0.195946	-0.123434	-0.0232698	0.0186342	-0.0954196	-0.145605	0.0468403	-0.110916	-0.227692	-0.0634092	-0.14401	0.00294715	0.00316405	0.165814	0.0035122	-0.162339	-0.0621743	-0.166368	yes		yes
O09061	PSMB1	O09061_PSMB1	-0.0218044	0.0229004	0.0607392	0.0299829	-0.0528949	0.051024	-0.0634092	-0.0380063	0.0524159	-0.013043	-0.0816138	-0.128156	-0.109359	-0.107803	-0.0335695	-0.077041	-0.100051	-0.0513992	0.00824722	0.549465	0.0056155	0.0332214	-0.064448	-0.134245	-0.0906617		yes
E9Q912	RAP1GDS1	E9Q912_RAP1GDS1	-0.00578235	0.0143553	-0.0365259	-0.0454314	-0.0634092	-0.0785637	-0.0877334	-0.0528949	-0.0335695	-0.0619024	-0.0694519	-0.153607	-0.0664274	-0.110916	0.0071955	-0.0634092	-0.0159576	-0.0394883	0.00999435	0.110153	0.00734152	0.942083	-0.0422551	-0.0482978	-0.00656882		yes
Q3U186	RARS2	Q3U186_RARS2	0.0129262	0.0129262	-0.0320936	0.0229004	0.0840643	0.116365	0.0593553	0	0.0565835	0.0840643	0.0894981	0.0676387	0.0786098	0.146655	0.182692	0.283329	0.22404	0.182692	1.04257e-05	0.0827337	0.0086216	1.36672e-06	0.0464291	0.0711381	0.19044		yes	yes	Yes
P54869	HMGCS2	P54869_HMGCS2	0.178874	0.263034	0.0676387	-0.164884	0.603122	0.635987	0.640621	0.987685	0.57628	0.715454	0.537048	0.503858	0.648005	0.257011	2.19912	1.45786	1.61965	1.62901	3.29784e-07	0.002821	0.0211209	4.93546e-09	0.512731	0.413792	1.50107	yes		yes	Yes
Q8K2L8	TRAPPC12	Q8K2L8_TRAPPC12	-0.00433459	0.0745054	0.0100637	-0.018878	-0.0101344	0	0.0100637	0.0426443	0.0229004	0.0129262	0.0342157	0.0257376	0	0.0398403	0.177599	0.133564	0.0908534	0.0482362	0.00265189	0.999302	0.978732	0.00402865	0.00719914	0.022873	0.109344			yes
Q8BH35	C8B	Q8BH35_C8B	0.0593553	0.134878	0.0426443	-0.132894	0.238787	0.534062	0.761285	0.21661	0.296311	0.550901	0.662661	0.816395	0.447844	0.304511	0.402722	0.413594	0.233888	0.120352	0.00538094	0.0192769	0.00198481	0.137789	0.245311	0.499901	0.267305		yes
Q9DCN1	NUDT12	Q9DCN1_NUDT12	-0.0306192	-0.0985055	-0.00868224	0.0962619	-0.00723157	-0.237864	-0.104697	-0.148801	-0.100051	-0.120294	-0.248108	-0.1976	-0.200913	-0.145605	-0.207561	-0.187707	-0.202572	-0.161653	0.00468836	0.0611606	0.00388953	0.00423658	-0.0850463	-0.177949	-0.175489		yes	yes	Yes		Yes
Q8BZJ7	DCUN1D2	Q8BZJ7_DCUN1D2	0.0468403	-0.00868224	-0.0232698	0.0621217	-0.0831412	-0.093879	-0.0365259	-0.0664274	-0.0831412	-0.013043	-0.120294	-0.0969617	-0.0923402	-0.0709665	-0.134477	-0.152003	-0.0679388	-0.125006	0.000580354	0.00499586	0.00287537	0.000260166	-0.10222	-0.111419	-0.148821	yes	yes	yes
Q8K157	GALM	Q8K157_GALM	0.108357	0.0143553	-0.013043	0.0313952	-0.0664274	-0.0558912	-0.0558912	-0.176251	-0.0877334	-0.0454314	-0.07552	-0.0634092	-0.132894	-0.224317	-0.0603973	-0.0679388	-0.0350469	-0.0908029	0.00803247	0.011039	0.00391733	0.0541141	-0.0893026	-0.0983953	-0.0870433		yes		Yes
Q8BIW1	PRUNE1	Q8BIW1_PRUNE1	0.0524159	0.015783	-0.0203404	0.0129262	0.0621217	0.0243197	-0.0159576	0.00288251	-0.011588	-0.0262051	-0.0350469	-0.142417	-0.0877334	-0.0634092	0.0717627	0.00432161	0.0607392	0.0786098	0.00112101	0.998788	0.00921255	0.339598	-0.0114721	-0.0777638	0.0518964		yes		Yes		Yes
Q9JKL5	TESC	Q9JKL5_TESC	-0.0877334	0.041243	-0.0679388	0.051024	-0.118727	-0.237864	-0.394032	-0.237864	-0.104697	-0.227692	-0.340075	-0.291592	-0.261881	-0.176251	-0.260152	-0.354759	-0.473931	-0.41889	0.000454602	0.0111427	0.00304536	0.000125453	-0.224516	-0.248533	-0.373477		yes	yes
P01887	B2M	P01887_B2M	-0.0954196	-0.150401	-0.0291463	0.0786098	-0.397828	-0.248108	-0.0634092	-0.275786	-0.172994	-0.226004	-0.186065	-0.296899	-0.321928	-0.334607	-0.411195	-0.26708	-0.382702	-0.465938	0.00190554	0.0327399	0.009483	0.000610578	-0.185825	-0.234616	-0.334666		yes	yes
P51863	ATP6V0D1	P51863_ATP6V0D1	0.00575927	-0.013043	0.0962619	-0.118727	0.0313952	0.140124	0.0786098	0.178874	0.102994	-0.011588	0.0922074	0.102994	0.0703893	0.0662614	0.225275	0.180148	0.253384	0.0621217	0.0116308	0.0647514	0.306781	0.00450203	0.106636	0.0740312	0.206353			yes
Q921H9	COA7	Q921H9_COA7	0.0229004	0.0071955	-0.0649175	0.0731347	0.0100637	-0.209228	-0.148801	-0.0908029	-0.046921	-0.0831412	-0.125006	-0.169745	-0.086201	-0.136062	-0.161653	-0.258425	-0.14401	-0.0619024	0.0202839	0.0812513	0.0316821	0.0097628	-0.105851	-0.140054	-0.167879			yes
Q61730-3	IL1RAP	Q61730-3_IL1RAP	0.051024	-0.0365259	0.0285692	-0.0484122	-0.330973	-0.288065	0.130931	-0.177882	-0.101598	-0.37146	-0.321928	-0.244685	-0.343732	-0.351074	-0.224317	-0.0679388	-0.330973	-0.281036	0.0072136	0.165387	0.00251751	0.0405249	-0.173904	-0.339754	-0.248698		yes
F8WI22	BCLAF1	F8WI22_BCLAF1	-0.0262051	-0.0424568	-0.086201	-0.0619024	-0.0439433	-0.147202	-0.013043	-0.0724828	-0.118727	-0.077041	-0.0800879	-0.077041	-0.0380063	-0.0985055	0.051024	-0.00723157	0.0607392	0.0551957	0.00100074	0.619424	0.751168	0.00720481	-0.0203032	-0.0248614	0.105289			yes
A0A0A0MQ90	S100A13	A0A0A0MQ90_S100A13	0.0565835	-0.0394883	0.0200577	-0.0350469	0.0271541	0.126973	0.0881416	0.0621217	-0.0306192	0.00432161	0.113701	-0.0218044	0.0593553	-0.0365259	0.15056	0.146655	0.144046	0.0840643	0.0176356	0.321322	0.844568	0.009395	0.0696163	0.0118162	0.152845			yes
Q8R1X6	SPART	Q8R1X6_SPART	-0.0159576	0.0086303	0.00575927	-0.0232698	-0.100051	-0.0394883	-0.112475	-0.0159576	-0.0709665	-0.114035	-0.0380063	-0.145605	-0.136062	-0.200913	-0.0588937	-0.0603973	-0.104697	-0.12658	0.0062527	0.109989	0.00199529	0.0394843	-0.0658673	-0.130963	-0.077448		yes
Q923T9	CAMK2G	Q923T9_CAMK2G	-0.0262051	-0.0649175	0.0214797	-0.0232698	-0.142417	-0.187707	-0.161653	-0.0969617	-0.120294	-0.22095	-0.254978	-0.28279	-0.236164	-0.237864	-0.129734	-0.222633	-0.231075	-0.21424	1.63385e-06	0.000579654	8.20509e-08	2.62887e-05	-0.11768	-0.213127	-0.193699	yes	yes	yes	Yes	Yes
O70548	TCAP	O70548_TCAP	0.102994	-0.0454314	0.0468403	0.0313952	0.316146	0.388465	0.369606	0.0827026	0.149259	0.651683	0.473008	0.636915	0.335712	0.138814	0	0.0384362	0.323082	0.22033	0.00882865	0.114194	0.00388856	0.621781	0.277028	0.43389	0.0902653		yes
Q9CQV1	PAM16	Q9CQV1_PAM16	-0.011588	-0.027675	-0.0203404	0.0827026	0.0129262	-0.0573917	-0.107803	-0.0499049	-0.0262051	-0.0203404	-0.0484122	-0.0985055	-0.0528949	-0.086201	-0.0846703	-0.112475	-0.128156	-0.0619024	0.0195952	0.173982	0.0621253	0.00721326	-0.0339407	-0.0369307	-0.0826085			yes
S4R2K0	PDF	S4R2K0_PDF	-0.0320936	0.0243197	-0.011588	0.015783	-0.0603973	-0.0816138	0.00288251	-0.0394883	-0.0218044	-0.0709665	-0.0262051	-0.0409718	-0.0724828	0.00432161	-0.046921	-0.0694519	-0.125006	-0.104697	0.016173	0.198871	0.181308	0.0051168	-0.0415858	-0.0430693	-0.0891719			yes
Q91Y97	ALDOB	Q91Y97_ALDOB	-0.120294	0.0881416	-0.0232698	-0.0203404	-0.305788	-0.0394883	-0.00578235	-0.0800879	-0.0365259	-0.14401	0.0285692	0.0827026	-0.0800879	-0.320126	-0.195946	-0.403542	-0.483985	-0.384584	0.00757809	0.708556	0.761228	0.00445791	-0.0176832	-0.0582828	-0.372258			yes	Yes
E9PYH2	ACOT7	E9PYH2_ACOT7	0.0172093	0.0186342	-0.018878	0.0313952	0.311503	0.228973	0.0908534	0.207893	0.16092	0.124328	0.107018	0.0648829	0.159629	0.192825	0.204141	0.230203	0.349365	0.320773	0.000191173	0.00124838	0.0312296	0.000110955	0.189971	0.106406	0.257566	yes		yes	Yes
A0A0R4J137	PHYHD1	A0A0R4J137_PHYHD1	-0.027675	0.0114956	-0.0709665	0.0854247	-0.0247367	-0.261881	-0.136062	-0.137648	-0.0664274	-0.117161	-0.1976	-0.104697	-0.168123	-0.118727	-0.164884	-0.270556	-0.279284	-0.104697	0.00971001	0.0548574	0.0296144	0.00363809	-0.127972	-0.110637	-0.20963			yes	Yes
B7ZN28	PAPLN	B7ZN28_PAPLN	0.00432161	0.0271541	-0.0484122	0.00288251	-0.0101344	-0.0573917	-0.093879	-0.0740006	-0.106249	-0.0724828	-0.0954196	-0.189351	-0.153607	-0.101598	-0.0174171	-0.0232698	0.0299829	0.0989585	0.000979815	0.110649	0.00339534	0.746781	-0.0776027	-0.1052	0.00268084		yes
F8VQC1	SRP72	F8VQC1_SRP72	0.0100637	-0.0380063	0.0662614	0	-0.086201	0.0114956	-0.0740006	-0.07552	-0.0513992	0.00144197	-0.0439433	-0.0320936	-0.134477	-0.0908029	-0.0291463	-0.093879	-0.199255	-0.194295	0.0269474	0.235656	0.191049	0.008901	-0.0790325	-0.0489751	-0.149119			yes
Q8CHS7	DHRS7C	Q8CHS7_DHRS7C	0.0328061	-0.0499049	0.119024	-0.0262051	0.0676387	0.0285692	0.0565835	0.0214797	0.0482362	0.175045	0.214125	0.164786	0.0854247	0.428678	0.190299	0.105678	0.133564	0.0496308	0.0121202	0.93491	0.00881424	0.23619	0.0449357	0.171744	0.11632		yes
Q8VCF0	MAVS	Q8VCF0_MAVS	0.0172093	-0.0409718	-0.00723157	0.0071955	0.0648829	0.0356239	0.125651	-0.011588	0.041243	0.102994	0.0813396	0.133564	0.158337	0.195348	0.0468403	0.0086303	0.153157	0.0827026	0.00482972	0.211894	0.00157335	0.081611	0.041261	0.133582	0.0647895		yes
P60824	CIRBP	P60824_CIRBP	-0.086201	0.00575927	0.0271541	-0.0159576	0.14274	0.0356239	0.0813396	0.233888	0.130931	0.0086303	0.132248	-0.155213	0.0214797	0.108357	0.306845	0.361768	0.27739	0.292782	0.000141129	0.0407577	0.773854	8.39085e-05	0.13603	0.0265789	0.304913			yes
Q9QX60	DGUOK	Q9QX60_DGUOK	0.00575927	0.0370307	0.0908534	0.0565835	0.0271541	-0.00288828	-0.0892673	0.0299829	0.0496308	-0.0785637	-0.0954196	-0.169745	-0.125006	-0.0454314	-0.0232698	-0.0174171	-0.110916	-0.0634092	0.00145852	0.369369	0.000757898	0.0209894	-0.019653	-0.142227	-0.0901466		yes		Yes	Yes
Q9D2V7	CORO7	Q9D2V7_CORO7	-0.00868224	0.0071955	0.0813396	-0.0439433	-0.027675	-0.0424568	-0.139236	-0.00144342	-0.0203404	-0.15682	-0.093879	-0.14401	-0.077041	-0.0439433	-0.013043	0.0172093	-0.00723157	-0.0439433	0.0147619	0.226614	0.00802223	0.860786	-0.0269316	-0.0931356	-0.00939391		yes
Q3UKJ7	SMU1	Q3UKJ7_SMU1	0.0243197	-0.00144342	0.0243197	0.0114956	0.0243197	-0.00433459	-0.0335695	0.0935602	-0.00723157	0.015783	0.0285692	0	0.0356239	-0.0394883	0.181421	0.100305	0.132248	0.204141	0.000135091	1	0.98701	0.000415197	-0.0222422	-0.00212465	0.138927			yes
Q91XD6	VPS36	Q91XD6_VPS36	-0.027675	-0.0218044	-0.0634092	0.0086303	-0.163268	-0.147202	-0.12658	-0.0923402	-0.0740006	-0.150401	-0.12658	-0.07552	-0.147202	-0.189351	-0.0174171	-0.118727	-0.145605	-0.117161	0.00802018	0.0118865	0.00373793	0.0642561	-0.10184	-0.122462	-0.0932043		yes
Q8BLY2	TARSL2	Q8BLY2_TARSL2	-0.0499049	0.0129262	-0.0454314	0.0086303	-0.0831412	-0.0619024	-0.139236	-0.103147	-0.0439433	-0.093879	-0.0740006	-0.131313	-0.244685	-0.101598	-0.139236	-0.171368	-0.187707	-0.177882	0.00205495	0.101175	0.0068502	0.000969893	-0.0647406	-0.0831974	-0.156224		yes	yes	Yes
E9QP56	APOC3	E9QP56_APOC3	0.121679	-0.100051	-0.00433459	-0.0320936	-0.463947	-0.199255	0.0384362	-0.479955	-0.430509	-0.242977	-0.142417	-0.362158	-0.330973	-0.675765	-0.621488	-0.639355	-0.643856	-0.818579	0.000727914	0.0488045	0.0237526	0.000172172	-0.412295	-0.312759	-0.623391			yes
Q9WVB0	RBPMS	Q9WVB0_RBPMS	-0.0409718	0.0214797	0.0257376	-0.0543923	0.0962619	0.111031	0.041243	0.117695	0.0593553	0.157044	0.0962619	0.149259	0.0989585	0.0908534	0.169925	0.16221	0.0703893	0.115033	0.000392141	0.00519252	0.000429459	0.000376859	0.106008	0.108705	0.148368	yes	yes	yes
Q3UIZ8	MYLK3	Q3UIZ8_MYLK3	-0.0380063	-0.0513992	0.104337	-0.120294	0.0482362	0.197865	0.0579701	0.260628	0.164786	0.105678	0.146655	0.015783	0.0538064	0.138814	0.0881416	0.0962619	0.0758749	0.0593553	0.0241428	0.00840154	0.0700893	0.133857	0.209489	0.150381	0.126711	yes				Yes
Q7TT50	CDC42BPB	Q7TT50_CDC42BPB	0.0172093	0	0.0482362	0.0342157	0.0758749	0.0813396	0.0745054	0.149259	0.0356239	0.0398403	0.0635029	0.0949116	0.0717627	0.0894981	0.168642	0.149259	0.210389	0.125651	0.000208551	0.0378452	0.102537	4.93832e-05	0.0501624	0.0460502	0.133238			yes	Yes	Yes
Q9WTU6-4	MAPK9	Q9WTU6-4_MAPK9	-0.0262051	-0.018878	0.0257376	0.0143553	-0.0800879	-0.046921	-0.0724828	0.015783	-0.0144996	-0.0306192	-0.0424568	-0.12658	-0.115597	-0.0877334	-0.0634092	-0.0679388	-0.132894	-0.104697	0.0118512	0.307779	0.0158782	0.00930889	-0.0446596	-0.0854721	-0.0840566			yes		Yes
Q99PL6	UBXN6	Q99PL6_UBXN6	-0.00868224	0.0214797	-0.0174171	0.00575927	0.00575927	-0.0350469	-0.0588937	-0.0335695	-0.0619024	-0.0694519	-0.152003	-0.128156	-0.0634092	-0.158429	0.0703893	0.015783	-0.0573917	0.0100637	0.000814306	0.35713	0.00135422	0.969149	-0.0335854	-0.126695	0.0143848		yes
E9PYL9	GM10036	E9PYL9_GM10036	-0.0306192	-0.0409718	0.0086303	-0.011588	-0.0513992	-0.0694519	-0.12658	-0.0724828	-0.166503	0.0100637	-0.00144342	-0.0831412	-0.152003	-0.0262051	-0.110916	-0.166503	-0.155213	-0.207561	0.00553914	0.0747017	0.644142	0.0029494	-0.0513792	-0.0051015	-0.139754			yes
B7ZMP1	XPNPEP3	B7ZMP1_XPNPEP3	-0.00868224	-0.0528949	-0.0394883	0.0621217	-0.0499049	-0.187707	-0.101598	-0.15682	-0.134477	-0.161653	-0.234465	-0.212568	-0.176251	-0.239566	-0.077041	-0.209228	-0.168123	-0.177882	0.000317346	0.00844608	0.00014084	0.00207233	-0.110392	-0.188483	-0.148917	yes	yes	yes	Yes
Q6PDL0	DYNC1LI2	Q6PDL0_DYNC1LI2	0.045443	0.0894981	0.0690147	0.00432161	-0.0232698	0.0172093	-0.0247367	0.0313952	0.0214797	-0.0232698	-0.00578235	-0.0649175	-0.0144996	-0.0969617	0.045443	0.0243197	0.0342157	0.0200577	0.00264797	0.0870843	0.00133226	0.646005	-0.0400196	-0.0804987	-0.0279611		yes
Q925F2	ESAM	Q925F2_ESAM	0.0100637	0.0299829	0.0799754	-0.0800879	0.0593553	0.195348	0.136191	0.0962619	0.105678	0.201634	0.16092	0.163499	0.196607	0.24245	0.238787	0.120352	0.197865	0.141433	0.000595678	0.017987	0.000356461	0.00127055	0.0856547	0.176584	0.149626		yes	yes
G3X956	SUPT16	G3X956_SUPT16	-0.0232698	-0.0528949	0.051024	-0.0694519	-0.0262051	0.0143553	0.00432161	0.0881416	-0.0380063	-0.00144342	-0.0306192	-0.011588	-0.0232698	0.041243	0.112367	0.0565835	0.120352	0.0935602	0.0050024	0.523385	0.837511	0.00302204	0.042404	0.0264943	0.141046			yes
Q00898	SERPINA1E	Q00898_SERPINA1E	0.0313952	0.27262	-0.184425	-0.378944	0.557778	1.74201	1.5612	0.0854247	0.58111	2.23113	2.44864	2.51526	1.55876	1.24975	0.577248	0.75873	0.206643	-0.354759	0.000331902	0.0498885	0.000238206	0.675624	0.657625	2.30764	0.46846		yes
Q8JZU0	NUDT13	Q8JZU0_NUDT13	0.0384362	0.0186342	0	0.132248	0.263034	-0.00868224	0.129613	0.0593553	0.0758749	0.145351	0.144046	0.134878	0.10165	0.159629	0.0962619	0.260628	0.359521	0.368489	0.0142127	0.63476	0.300746	0.00611092	0.0473397	0.115511	0.281539			yes
Q5U3K5	RABL6	Q5U3K5_RABL6	-0.0908029	-0.0513992	-0.0232698	-0.16004	-0.298673	-0.142417	-0.352916	-0.166503	-0.148801	-0.120294	-0.195946	-0.265345	-0.345564	-0.249822	-0.226004	-0.263612	-0.364013	-0.369595	0.0110614	0.0534349	0.0334717	0.00419368	-0.095402	-0.178721	-0.242711			yes
Q7TNG8	LDHD	Q7TNG8_LDHD	-0.110916	0.0271541	0.0257376	0.207893	-0.0694519	-0.446148	-0.0816138	-0.200913	-0.0892673	-0.125006	-0.199255	-0.158429	-0.312939	-0.26708	-0.438307	-0.365871	-0.298673	-0.358454	0.0020206	0.0370426	0.0155913	0.000582706	-0.115713	-0.225701	-0.388608			yes	Yes
O35901	LSM2	O35901_LSM2	0.0922074	0.045443	0.0551957	0.077243	0.107018	0.0285692	0.0538064	0.0731347	0.0426443	0.107018	0.0827026	-0.018878	0.045443	0.0071955	0.182692	0.123004	0.183963	0.181421	0.000904756	0.985867	0.669586	0.00429788	-0.012413	-0.0207764	0.115837			yes
O55234	PSMB5	O55234_PSMB5	0.0662614	0.00144197	-0.046921	0.00575927	-0.0573917	-0.00288828	-0.0350469	0.00288251	-0.00433459	-0.0262051	-0.046921	-0.0558912	-0.0603973	-0.0634092	-0.0558912	-0.0588937	-0.0800879	-0.0679388	0.00829315	0.372581	0.0187182	0.00566086	-0.00793521	-0.0594918	-0.0670169			yes
Q3TLH4	PRRC2C	Q3TLH4_PRRC2C	0.0172093	-0.0484122	0.00288251	0.0854247	0.0384362	-0.0454314	-0.0174171	-0.0484122	-0.179515	0.0370307	-0.0724828	-0.0892673	-0.0694519	-0.0709665	-0.204233	-0.169745	-0.0679388	-0.182786	0.0149501	0.322674	0.294987	0.00515245	-0.0554773	-0.0810124	-0.186311			yes
Q8N7N5	DCAF8	Q8N7N5_DCAF8	-0.0174171	0.0398403	0.0271541	0.0114956	0.0482362	-0.0528949	-0.0694519	0.0468403	-0.00868224	-0.106249	-0.0528949	-0.125006	-0.142417	-0.093879	0.0114956	-0.0394883	0.00288251	0.0114956	0.00113015	0.705577	0.000960427	0.822088	-0.0280071	-0.125574	-0.0121358		yes
Q6PAM0	PRKAB2	Q6PAM0_PRKAB2	0.0440443	-0.00288828	0.0229004	0.0827026	0.015783	0.0129262	-0.0424568	-0.046921	-0.0439433	-0.0543923	-0.103147	-0.152003	-0.190997	-0.110916	-0.226004	-0.205896	-0.139236	-0.142417	1.31855e-05	0.140421	0.000177453	1.82749e-05	-0.0759292	-0.144388	-0.207629		yes	yes	Yes	Yes
H7BWY6	RBP4	H7BWY6_RBP4	0.108357	0.015783	0.0565835	0.151859	-0.411195	-0.349235	-0.16004	-0.349235	-0.174621	-0.440263	-0.229382	-0.475936	-0.736966	-0.498179	-0.430509	-0.263612	-0.428566	-0.496142	7.40571e-05	0.00175176	3.35196e-05	0.000279882	-0.431705	-0.558406	-0.512008	yes	yes	yes
Q8K182	C8A	Q8K182_C8A	0.109695	0.167358	0.0229004	-0.168123	0.324235	0.584	0.795767	0.225275	0.323082	0.612588	0.673556	0.839153	0.529071	0.265437	0.463622	0.508936	0.318461	0.259423	0.00521004	0.0140532	0.00193014	0.0480592	0.257937	0.54629	0.324744		yes
Q9CPS6	HINT3	Q9CPS6_HINT3	0.0229004	0.0731347	-0.018878	-0.0232698	-0.0785637	-0.0424568	-0.112475	-0.0831412	-0.0634092	-0.07552	-0.0679388	0	-0.0694519	-0.114035	-0.121863	-0.125006	-0.129734	-0.140826	0.00030902	0.00381603	0.00891654	0.000122288	-0.0805749	-0.0714631	-0.129381	yes	yes	yes
Q91YN9	BAG2	Q91YN9_BAG2	-0.00288828	-0.0218044	-0.07552	0.00288251	-0.093879	-0.0409718	-0.187707	-0.136062	-0.148801	-0.0499049	-0.0800879	-0.194295	-0.200913	-0.202572	-0.21424	-0.189351	-0.251539	-0.212568	0.00157797	0.0435915	0.0121734	0.000458611	-0.123716	-0.181949	-0.201058			yes
Q9EPL4	METTL9	Q9EPL4_METTL9	0.0426443	-0.0634092	-0.0892673	0.0976108	-0.0484122	-0.179515	-0.148801	-0.249822	-0.182786	-0.150401	-0.32916	-0.272297	-0.296899	-0.121863	-0.202572	-0.288065	-0.227692	-0.222633	0.0019788	0.0208943	0.0014739	0.00213288	-0.169133	-0.261915	-0.21478		yes	yes	Yes
Q01279	EGFR	Q01279_EGFR	0.197865	0.0271541	-0.086201	-0.0649175	0.52707	0.659925	1.23634	0.266637	0.24245	0.83996	0.642471	1.19093	0.882056	0.337996	0.563646	0.668119	0.704872	0.498761	0.00870827	0.0248417	0.00358267	0.0272133	0.545952	0.858842	0.634764		yes			Yes
Q9DBB9	CPN2	Q9DBB9_CPN2	0.00575927	-0.0709665	-0.00433459	0.0840643	-0.21927	-0.316528	0.167358	-0.194295	-0.181149	-0.121863	-0.305788	-0.0394883	-0.169745	-0.424688	-0.422752	-0.375197	-0.422752	-0.411195	0.00486365	0.238731	0.0693796	0.00164511	-0.195007	-0.170457	-0.417686			yes	Yes
Q3ULW8	PARP3	Q3ULW8_PARP3	-0.0877334	-0.0603973	-0.013043	-0.0262051	-0.207561	-0.302226	-0.236164	-0.018878	-0.176251	-0.351074	-0.184425	-0.365871	-0.416962	-0.200913	-0.12658	-0.186065	-0.226004	-0.311148	0.00620921	0.0775665	0.00192071	0.0476522	-0.16426	-0.307773	-0.162733		yes		Yes
Q6PFB2	RCC1	Q6PFB2_RCC1	0.0229004	0.0538064	-0.0174171	0.0271541	0.0071955	-0.0892673	-0.134477	-0.125006	-0.109359	-0.153607	-0.0724828	-0.224317	-0.0603973	-0.0439433	0.0468403	-0.0603973	0.0129262	-0.0320936	0.0102332	0.0281638	0.0099506	0.796276	-0.134386	-0.0975101	-0.034611		yes
Q9DCT1	AKR1E2	Q9DCT1_AKR1E2	-0.0394883	0	-0.0101344	-0.0603973	-0.0454314	-0.0603973	-0.0424568	-0.077041	-0.0232698	-0.104697	-0.0291463	-0.227692	-0.166503	-0.118727	-0.101598	-0.0908029	-0.100051	-0.0831412	0.0136071	0.777298	0.00866027	0.11094	-0.02062	-0.0939157	-0.0706156		yes
Q8K3G9	APPL2	Q8K3G9_APPL2	0.0426443	-0.0144996	0.0129262	-0.00868224	-0.0101344	-0.0320936	-0.0409718	-0.0409718	-0.0380063	-0.0969617	-0.123434	-0.161653	-0.046921	-0.169745	0.0593553	0.0328061	0.0565835	0.0086303	1.85699e-05	0.185509	0.000109869	0.397616	-0.0401283	-0.125556	0.0425728		yes
P08607	C4BPA	P08607_C4BPA	0.0813396	0.0468403	-0.115597	-0.0262051	-0.171368	-0.231075	0.204141	-0.32916	-0.0954196	-0.0232698	-0.0694519	0.140124	-0.0785637	-0.22095	-0.650635	-0.508403	-0.323733	-0.42082	0.00191156	0.493128	0.932241	0.00147219	-0.181686	-0.0797695	-0.474929			yes
A0A140T8J4	HEBP1	A0A140T8J4_HEBP1	0.0524159	0.137504	0.112367	0.0648829	0.0949116	0.0786098	0.0593553	0.138814	0.16092	-0.0203404	0.015783	-0.0218044	-0.0101344	-0.00433459	-0.027675	0.0370307	0.0285692	0.0593553	0.000426429	0.857785	0.00202893	0.0397825	0.00628665	-0.0987593	-0.055825		yes
P97298	SERPINF1	P97298_SERPINF1	0.045443	-0.0649175	0.0328061	-0.0174171	-0.161653	-0.0262051	0.10165	-0.0159576	-0.0816138	-0.171368	-0.166503	-0.174621	-0.295128	-0.354759	-0.103147	-0.0394883	0.0676387	-0.270556	0.0139067	0.901988	0.00896991	0.482225	-0.0338996	-0.182315	-0.0790121		yes
Q9JHU9	ISYNA1	Q9JHU9_ISYNA1	0.0384362	0.0243197	0.0538064	-0.0380063	0.051024	0.146655	0.0607392	0.0745054	0.00432161	0.0758749	0.109695	0.0398403	0.120352	0.0285692	0.240009	0.117695	0.153157	0.10165	0.0134998	0.35601	0.254541	0.00469376	0.0293612	0.0444969	0.104048			yes
A2AVR6	ACOT11	A2AVR6_ACOT11	0.0172093	-0.120294	0.0662614	-0.013043	-0.28279	-0.356606	-0.152003	-0.272297	-0.300448	-0.190997	-0.077041	-0.150401	-0.209228	-0.296899	-0.177882	-0.380822	-0.330973	-0.386468	0.000566533	0.000998768	0.0194527	0.000395946	-0.284873	-0.19308	-0.357981	yes		yes	Yes
O55201	SUPT5H	O55201_SUPT5H	-0.00288828	-0.0306192	-0.027675	-0.0394883	-0.0543923	-0.0724828	0.0356239	0.0172093	-0.0291463	-0.018878	-0.0543923	-0.0740006	-0.0603973	-0.0291463	0.133564	0.0676387	0.113701	0.0482362	0.000160881	0.993845	0.641531	0.000760832	8e-07	-0.0252452	0.119817			yes
Q9CZP7	CDC37L1	Q9CZP7_CDC37L1	-0.0101344	0.0538064	-0.0619024	0.0271541	-0.140826	-0.0985055	-0.1976	-0.22095	-0.07552	-0.0232698	-0.00723157	-0.169745	-0.139236	-0.164884	-0.139236	-0.164884	-0.142417	-0.110916	0.0101873	0.00585935	0.0537084	0.0121999	-0.149336	-0.147746	-0.149336	yes
Q8C0D5	EFL1	Q8C0D5_EFL1	-0.0424568	-0.00723157	-0.00723157	-0.00144342	-0.0380063	-0.115597	-0.046921	-0.077041	-0.0499049	-0.0969617	-0.22095	-0.16004	-0.125006	-0.200913	-0.0335695	-0.0350469	-0.077041	-0.0218044	0.000114683	0.116852	7.10571e-05	0.565511	-0.0426733	-0.152808	-0.0270766		yes		Yes
F8VQ28	PXN	F8VQ28_PXN	0.00288251	-0.0484122	-0.00288828	-0.018878	0.0468403	-0.0740006	-0.0558912	0.0328061	0.0551957	-0.0101344	-0.0350469	-0.0603973	0.00288251	-0.0484122	0.124328	0.0648829	0.102994	0.0717627	0.0022256	0.832512	0.916464	0.00442394	0.0436892	-0.0241638	0.0982615			yes
Q6WKZ8	UBR2	Q6WKZ8_UBR2	0.0468403	-0.0203404	-0.0380063	-0.0203404	-0.0335695	-0.0558912	-0.0528949	-0.00144342	-0.0232698	-0.115597	-0.0800879	-0.125006	-0.12658	-0.0394883	0.109695	0.0827026	0.0271541	0.0356239	6.4339e-05	0.556942	0.00427102	0.0260875	-0.0132291	-0.0952566	0.0795037		yes		Yes
P60603	ROMO1	P60603_ROMO1	-0.0159576	0.0129262	-0.013043	0.0285692	0.0114956	-0.161653	-0.132894	-0.0649175	0.0071955	-0.0694519	0.111031	-0.177882	-0.103147	0.00575927	-0.131313	-0.265345	-0.244685	-0.1976	0.0102942	0.406034	0.659564	0.00470685	-0.0648591	-0.0693935	-0.221084			yes
Q9JIQ3	DIABLO	Q9JIQ3_DIABLO	-0.0232698	0.0384362	-0.00144342	-0.0218044	0.232661	0.123004	0.10165	0.144046	0.140124	0.0621217	0.169925	0.0962619	0.140124	0.211635	0.387363	0.288063	0.269033	0.367371	3.50605e-06	0.00179392	0.00329313	3.59247e-07	0.151748	0.151748	0.339341	yes	yes	yes
Q9DBS2	TPRG1L	Q9DBS2_TPRG1L	-0.027675	-0.0424568	-0.0985055	0.0342157	-0.00723157	-0.013043	0.0243197	0.124328	0.00144197	-0.0203404	-0.013043	-0.0232698	0.0565835	0.00144197	0.163499	0.115033	0.116365	0.146655	0.000584628	0.154329	0.541286	0.000332234	0.0365079	0.0220229	0.166576			yes
Q8CBE3	WDR37	Q8CBE3_WDR37	0.0813396	0.134878	0.0593553	0.100305	0.0593553	0.111031	0.0114956	0.0786098	0.0579701	0.0370307	0.0356239	-0.0543923	0.0129262	-0.0144996	0.137504	0.077243	0.0524159	0.138814	0.00572267	0.501127	0.00777383	0.983318	-0.031467	-0.0778961	0.0165512		yes
Q8C0E2	VPS26B	Q8C0E2_VPS26B	-0.0159576	-0.0247367	0.0186342	-0.0335695	-0.0218044	0.113701	0.0648829	0.0989585	0.0565835	0.0908534	0.0813396	0.0496308	0.0172093	-0.00723157	0.16221	0.107018	0.205393	0.109695	0.00121017	0.048952	0.133239	0.000334138	0.0852301	0.069978	0.1563			yes
Q9JJU8	SH3BGRL	Q9JJU8_SH3BGRL	-0.00723157	0.0342157	0.144046	-0.0679388	-0.0144996	0.221568	0.172488	0.209141	0.100305	0.149259	0.166073	0.0867838	0.159629	0.0827026	0.271426	0.189034	0.348232	0.210389	0.00824591	0.115798	0.154887	0.00250503	0.158996	0.135767	0.227415			yes
O55137	ACOT1	O55137_ACOT1	0.0100637	0.149259	0.015783	0.077243	0.173767	0.0482362	0.0976108	0.305679	0.173767	0.222805	0.00575927	-0.0306192	0.211635	0.0114956	0.60502	0.437228	0.263034	0.526069	0.000577672	0.446442	0.983443	0.000602932	0.127254	-0.0350174	0.435136			yes	Yes
Q9Z0G0	GIPC1	Q9Z0G0_GIPC1	-0.0247367	-0.0262051	-0.0800879	-0.0335695	0.0172093	0.168642	0.0271541	0.133564	0.130931	-0.00723157	-0.0724828	-0.0144996	0.0328061	-0.109359	-0.0203404	0.136191	0.0662614	0.0482362	0.00569959	0.00824548	0.995333	0.0704414	0.160818	0.0153877	0.0871361	yes
Q68FH4	GALK2	Q68FH4_GALK2	0.0607392	-0.0588937	-0.00144342	-0.0320936	0.0648829	0.0662614	0.134878	0.0342157	0.0172093	0.0949116	0.0313952	0.0496308	0.0200577	-0.0846703	0.0799754	0.136191	0.267835	0.16221	0.00769035	0.231035	0.797113	0.00409317	0.0816514	0.0481637	0.165969			yes	Yes	Yes
Q60866	PTER	Q60866_PTER	-0.00868224	0.0989585	0.0662614	-0.0262051	0.0299829	-0.0365259	-0.0846703	-0.0588937	-0.00723157	-0.0144996	-0.0785637	-0.145605	-0.093879	-0.125006	-0.086201	-0.0969617	-0.07552	-0.0247367	0.00965895	0.151832	0.00439506	0.0214496	-0.0653155	-0.122669	-0.10965		yes		Yes
O09114	PTGDS	O09114_PTGDS	0.342555	-0.0528949	-0.277534	-0.117161	-0.630394	-0.785875	-0.554273	-1.06794	-0.788365	-0.360305	-0.277534	-0.41889	-0.446148	-0.808437	-0.805913	-0.446148	-0.314733	0.00288251	0.00523479	0.00164663	0.0503854	0.133664	-0.700847	-0.333862	-0.295413	yes			Yes
A0A0R4J0G0	PCK2	A0A0R4J0G0_PCK2	-0.0558912	-0.0649175	0.00288251	-0.110916	-0.0800879	0.0593553	0.0342157	0.140124	0.00288251	-0.0740006	-0.0619024	-0.12658	-0.0247367	0.0200577	0.146655	0.126973	0.182692	0.100305	0.00073558	0.0984219	0.999295	0.000921624	0.0946201	-0.00149805	0.197218			yes	Yes	Yes
Q8BGI7	LRRC39	Q8BGI7_LRRC39	0.112367	0.128293	0.0662614	0.0881416	0.108357	0.0496308	0.041243	0.0143553	0.0086303	0.00575927	-0.0454314	-0.0499049	0.00288251	-0.12658	0.0758749	0.0398403	0.0398403	0.0621217	0.000628082	0.130227	0.000251637	0.279712	-0.0590113	-0.145686	-0.0492733		yes
P41317	MBL2	P41317_MBL2	-0.0679388	-0.150401	-0.046921	0.132248	-0.599462	-0.753896	-0.275786	-0.469929	-0.504305	-0.724993	-0.666576	-0.522841	-0.833927	-0.766112	-0.011588	-0.83908	-0.862496	-1.11716	0.00597236	0.0327146	0.00425498	0.00599293	-0.446875	-0.667563	-0.793358		yes	yes
Q9JLM9	GRB14	Q9JLM9_GRB14	0.051024	-0.0247367	-0.077041	0.0384362	-0.106249	-0.152003	-0.171368	-0.207561	-0.209228	-0.0634092	-0.134477	-0.155213	-0.237864	-0.172994	-0.086201	-0.177882	-0.145605	-0.15682	0.00144911	0.000951725	0.00213405	0.00589611	-0.178218	-0.162063	-0.158062	yes	yes	yes
Q91XU3	PIP4K2C	Q91XU3_PIP4K2C	0.0285692	-0.018878	0.0398403	-0.0484122	-0.104697	-0.104697	-0.0969617	-0.0232698	-0.0892673	-0.248108	-0.0291463	-0.164884	-0.234465	-0.121863	-0.0679388	-0.107803	-0.103147	-0.134477	0.00697957	0.10123	0.00213314	0.0504905	-0.101807	-0.16973	-0.110321		yes		Yes	Yes
Q99L04	DHRS1	Q99L04_DHRS1	0.051024	-0.0499049	0.0271541	0.0299829	-0.077041	-0.0954196	-0.0424568	-0.0603973	-0.101598	-0.077041	-0.0159576	-0.0724828	-0.120294	-0.077041	-0.104697	-0.117161	-0.0846703	-0.117161	0.000704848	0.00271351	0.00324141	0.000368	-0.105609	-0.105609	-0.139497	yes	yes	yes	Yes
Q8BIL5	HOOK1	Q8BIL5_HOOK1	-0.0985055	-0.0350469	-0.0908029	-0.0740006	-0.179515	-0.187707	-0.136062	-0.148801	-0.199255	-0.163268	-0.227692	-0.227692	-0.226004	-0.222633	-0.254978	-0.1976	-0.212568	-0.134477	0.000142712	0.00239246	7.64415e-05	0.000388649	-0.0971133	-0.143602	-0.122682	yes	yes	yes
Q8BVG4	DPP9	Q8BVG4_DPP9	0.0129262	-0.00868224	0.0100637	0.0299829	-0.0101344	-0.0528949	-0.0350469	0.0229004	-0.0335695	-0.137648	-0.132894	-0.077041	-0.147202	-0.0291463	-0.0877334	-0.0724828	-0.114035	-0.128156	0.000292537	0.364944	0.000477259	0.00109659	-0.0450645	-0.144389	-0.112379		yes	yes	Yes
Q91YS8	CAMK1	Q91YS8_CAMK1	-0.109359	-0.0439433	0.0214797	0.0676387	-0.0694519	0.045443	-0.0603973	-0.0513992	-0.0573917	-0.112475	-0.12658	-0.248108	-0.179515	-0.169745	-0.0513992	-0.109359	-0.177882	-0.184425	0.00504268	0.892088	0.00541207	0.0420423	-0.0461599	-0.158513	-0.132389		yes		Yes	Yes
A0A0G2JEP4	LRRFIP2	A0A0G2JEP4_LRRFIP2	0.00288251	0	-0.0588937	-0.0365259	0.0342157	0.0440443	-0.0306192	-0.0831412	-0.00578235	-0.00578235	0	-0.00288828	-0.0306192	-0.077041	0.102994	0.0607392	0.144046	0.102994	0.000800551	0.887456	1	0.00118782	0.0124806	0.0124806	0.121257			yes
Q6W8Q3	PCP4L1	Q6W8Q3_PCP4L1	0.0114956	0.14274	0.178874	0	0.129613	0.166073	0.0551957	0.214125	0.157044	0.313826	0.386259	0.379621	0.337996	0.290424	0.24245	0.393965	0.353888	0.212881	0.000170779	0.434703	0.000216952	0.00163568	0.0799262	0.260878	0.221051		yes	yes
Q8R5A0	SMYD2	Q8R5A0_SMYD2	0.0200577	0.117695	0.0538064	0.107018	0.164786	0.163499	0.0703893	0.0524159	0.210389	-0.0831412	-0.0664274	-0.0892673	-0.14401	-0.123434	0	0.0468403	0.00288251	0.0229004	1.18128e-05	0.193467	0.000174436	0.238073	0.0830868	-0.169679	-0.0675207		yes		Yes
Q9CZ83-2	MRPL55	Q9CZ83-2_MRPL55	-0.0603973	0.041243	-0.086201	-0.0144996	-0.018878	0.0676387	-0.00723157	0.0214797	-0.00868224	-0.0484122	-0.0380063	-0.0101344	0.0172093	-0.0232698	0.171207	0.137504	0.0745054	0.117695	0.00020972	0.314593	0.967821	0.000245951	0.0302169	0.0141787	0.165048			yes
Q8BX10	PGAM5	Q8BX10_PGAM5	-0.0439433	-0.0291463	0.0881416	-0.0218044	-0.148801	-0.153607	-0.212568	-0.046921	-0.139236	-0.195946	-0.134477	-0.351074	-0.217591	-0.186065	0.00432161	-0.132894	-0.242977	-0.246395	0.0117653	0.0591372	0.00405028	0.0476769	-0.123326	-0.170471	-0.16246		yes
B2RXQ2	PPFIA1	B2RXQ2_PPFIA1	0.0071955	0.0114956	-0.0174171	0	0.0271541	0.124328	0.0786098	0.115033	0.0285692	0.0071955	0.0482362	0	0.0621217	0.104337	0.145351	0.151859	0.173767	0.0299829	0.0108572	0.0689311	0.359285	0.00436096	0.075012	0.0446385	0.145007			yes
Q8K0F1	TBC1D23	Q8K0F1_TBC1D23	-0.0923402	-0.104697	-0.0649175	-0.115597	-0.0985055	-0.0724828	-0.0785637	-0.0159576	0.0229004	-0.129734	-0.0409718	-0.0831412	-0.0664274	-0.013043	-0.00868224	-0.00288828	0.015783	0.00432161	0.0173258	0.203408	0.560552	0.00706628	0.0260358	0.0320912	0.0992353			yes
Q6NZN0	RBM26	Q6NZN0_RBM26	-0.0320936	0.0468403	-0.0484122	-0.0350469	-0.046921	0.0186342	0.0129262	0.0949116	-0.0439433	-0.0558912	0	-0.011588	-0.00144342	0.0114956	0.113701	0.0496308	0.0840643	0.0989585	0.0102292	0.70983	0.993377	0.0085177	0.0464964	0.0321268	0.125082			yes
Q7TPD2	FAM185A	Q7TPD2_FAM185A	-0.145605	0.0342157	0.0356239	-0.0101344	-0.129734	-0.0619024	-0.253257	-0.137648	-0.107803	-0.0985055	-0.0203404	-0.314733	-0.268817	-0.0380063	-0.251539	-0.347399	-0.242977	-0.332789	0.00962045	0.195771	0.15003	0.00299315	-0.141775	-0.110546	-0.304205			yes
Q8CHY3	DYM	Q8CHY3_DYM	-0.158429	-0.227692	-0.274041	-0.226004	-0.263612	-0.224317	-0.236164	-0.236164	-0.260152	-0.202572	-0.28279	-0.263612	-0.195946	-0.190997	-0.109359	-0.16004	-0.07552	-0.109359	0.000558143	0.683792	0.990862	0.00265342	-0.009316	0.024276	0.117489			yes
G3UXL2	PRPS1L3	G3UXL2_PRPS1L3	0.0565835	-0.00433459	-0.0335695	0.0989585	-0.027675	-0.0954196	0.141433	-0.106249	-0.0954196	-0.137648	-0.189351	-0.115597	-0.121863	-0.229382	-0.202572	-0.194295	-0.189351	-0.277534	0.000648653	0.382566	0.00348408	0.00064862	-0.121544	-0.163772	-0.224558		yes	yes	Yes
P16294	F9	P16294_F9	0.154454	-0.0923402	-0.186065	0.0285692	-0.224317	-0.205896	-0.0634092	-0.270556	-0.375197	-0.110916	-0.186065	-0.172994	-0.231075	-0.272297	-0.318326	-0.314733	-0.356606	-0.260152	0.00718367	0.0205624	0.0536744	0.00273062	-0.192431	-0.15418	-0.284644			yes
P34928	APOC1	P34928_APOC1	0.126973	-0.195946	-0.125006	-0.018878	-0.833927	-0.45799	-0.0203404	-0.628162	-0.595097	-0.386468	-0.405451	-0.72977	-0.560643	-0.854649	-1.1078	-1.07097	-1.13606	-1.3474	4.08479e-05	0.0175335	0.00600733	5.5134e-06	-0.523155	-0.488701	-1.04999		yes	yes
Q3V2H3	SNX12	Q3V2H3_SNX12	0.051024	0.00144197	0.0172093	-0.109359	-0.0101344	-0.00433459	0.0496308	0.0214797	0.015783	0.0962619	0.0285692	0.0482362	0.0313952	-0.0846703	0.125651	0.102994	0.129613	0.126973	0.0109048	0.801797	0.619348	0.00607539	0.00645736	0.0220696	0.116986			yes
Q9D0I6	WDSUB1	Q9D0I6_WDSUB1	0.0271541	0.0538064	0.0867838	-0.0232698	0.0342157	0.119024	0.132248	0.147958	0.0299829	0.0703893	0.107018	0.0758749	0.104337	0.0172093	0.166073	0.199123	0.199123	0.0731347	0.0245773	0.252958	0.525386	0.00955842	0.0785438	0.0353946	0.142118			yes
P62874	GNB1	P62874_GNB1	0.0243197	-0.0218044	-0.0218044	0.00288251	0.015783	-0.013043	0.0648829	0.045443	-0.0365259	0.128293	0.10165	0.0799754	0.167358	-0.0394883	0.117695	0.0731347	0.172488	0.159629	0.00750169	0.898444	0.0521841	0.00733832	0.0252439	0.111111	0.148123			yes
P70266	PFKFB1	P70266_PFKFB1	-0.0724828	0.159629	0.0328061	-0.148801	-0.268817	-0.145605	-0.274041	-0.128156	0.102994	-0.129734	-0.107803	-0.0724828	-0.139236	-0.189351	-0.161653	-0.354759	-0.637109	-0.691989	0.00641646	0.441864	0.528521	0.00283099	-0.125767	-0.109896	-0.476096			yes	Yes	Yes
D3Z7Q2	SMIM20	D3Z7Q2_SMIM20	0.00575927	-0.0380063	-0.101598	-0.00868224	-0.0573917	-0.227692	-0.242977	-0.0923402	-0.134477	-0.171368	-0.222633	-0.320126	-0.272297	-0.215915	-0.224317	-0.209228	-0.234465	-0.158429	0.00105443	0.0307588	0.000496554	0.00327949	-0.111133	-0.199289	-0.193428		yes	yes
P97825	JPT1	P97825_JPT1	0.0214797	0.0384362	0.0524159	-0.00578235	0.228973	0.323082	0.197865	0.145351	0.128293	0.238787	0.290424	0.187768	0.207893	0.108357	0.183963	0.353888	0.39835	0.355016	0.000396772	0.00584456	0.00551527	9.51323e-05	0.167907	0.177935	0.324494	yes	yes	yes
Q9D287	BCAS2	Q9D287_BCAS2	0.0229004	-0.0247367	0.0299829	0.0356239	0.0854247	0.0328061	0.0114956	0.0356239	0.0384362	0.0328061	0.0313952	-0.0603973	0.0662614	0.0214797	0.133564	0.0962619	0.137504	0.125651	0.00102857	0.546613	0.999024	0.00115328	0.00918225	0.00495355	0.103166			yes
Q9ES82	POPDC2	Q9ES82_POPDC2	0.0854247	-0.0831412	0.0100637	-0.046921	0.117695	0.113701	0.0285692	-0.0203404	0.0607392	0.194087	0.181421	0.191563	0.155749	0.43189	0.200379	0.0299829	0.182692	0.136191	0.00454741	0.487305	0.00214555	0.0675534	0.0791678	0.209992	0.17787		yes
Q6PE01	SNRNP40	Q6PE01_SNRNP40	0.0214797	0.0799754	0.0867838	0.0551957	0.0949116	0.189034	0.128293	0.111031	0.176323	0.0538064	0.0214797	-0.0380063	0.0200577	-0.0247367	0.196607	0.235114	0.172488	0.125651	3.78e-05	0.0230281	0.13249	0.00160086	0.0607074	-0.0475278	0.116962			yes
Q9D7F7	CHMP4C	Q9D7F7_CHMP4C	-0.0335695	-0.0232698	0.0271541	-0.0969617	-0.177882	-0.137648	-0.190997	-0.117161	-0.166503	-0.172994	-0.115597	-0.0543923	-0.106249	-0.186065	0.00288251	-0.00288828	-0.0484122	-0.027675	0.000350388	0.00144671	0.0111674	0.947348	-0.138083	-0.0871774	0.013138	yes
Q4ZJN1	C1QTNF9	Q4ZJN1_C1QTNF9	-0.013043	-0.0513992	-0.0454314	0.185232	-0.0954196	-0.227692	0.0524159	0.0621217	-0.117161	-0.32916	-0.332789	-0.227692	-0.129734	-0.103147	-0.207561	-0.172994	-0.281036	-0.21424	0.0088242	0.494048	0.00910878	0.0151585	-0.0661824	-0.198455	-0.181663		yes
H3BL37	TCOF1	H3BL37_TCOF1	-0.011588	-0.00868224	0.0989585	-0.0679388	0.0071955	0.0172093	0.0328061	-0.0740006	-0.0439433	-0.0634092	0.130931	0.00432161	0.0482362	0.0827026	0.187768	0.314986	0.125651	0.177599	0.00161625	0.97472	0.736601	0.00266945	0.0173306	0.0583713	0.192819			yes
Q8R4R6	NUP35	Q8R4R6_NUP35	0.00575927	0.0621217	-0.0365259	-0.013043	0.0482362	0.00288251	-0.00578235	0.0100637	-0.0247367	-0.00578235	0.0426443	-0.0740006	-0.0291463	-0.00578235	0.130931	0.133564	0.0949116	0.0935602	0.000409858	0.999761	0.747539	0.00159	0.00652437	-0.00214049	0.116563			yes
Q3UE37	UBE2Z	Q3UE37_UBE2Z	-0.093879	-0.129734	-0.0694519	-0.137648	-0.0649175	-0.0634092	-0.106249	-0.115597	-0.0424568	-0.00578235	-0.0320936	-0.0908029	-0.0454314	-0.0588937	0.0426443	0.0172093	0.0935602	0.0813396	2.11524e-05	0.413362	0.0339923	1.70095e-05	0.046889	0.0663751	0.173798			yes
Q9Z1W9	STK39	Q9Z1W9_STK39	0.0662614	-0.0320936	0.124328	0.0786098	0.0468403	0.181421	0.0935602	0.0703893	0.0468403	0.265437	0.201634	0.177599	0.233888	0.0468403	0.227741	0.158337	0.331132	0.271426	0.00591669	0.87229	0.0462375	0.00553879	-0.0020463	0.129198	0.177148			yes	Yes	Yes
Q8VCG4	C8G	Q8VCG4_C8G	0.0607392	-0.00288828	0.0172093	-0.0558912	0.186501	0.293959	0.696884	0.0703893	0.0962619	0.507921	0.37629	0.794936	0.518031	0.206643	0.27858	0.24732	0.257011	0.187768	0.0131703	0.112471	0.00402362	0.191558	0.17934	0.50076	0.245005		yes
Q9R190	MTA2	Q9R190_MTA2	-0.169745	-0.1976	0.0976108	-0.027675	-0.0454314	0.0976108	0.0799754	-0.0247367	-0.07552	0.077243	-0.0954196	0.0398403	0.120352	0.0285692	0.138814	0.196607	0.128293	0.15056	0.0192548	0.403743	0.200031	0.00689676	0.0739733	0.13855	0.243397			yes
A2AG30	DNAJB5	A2AG30_DNAJB5	-0.086201	0.0114956	0.0285692	-0.0101344	-0.142417	-0.00723157	-0.195946	-0.128156	-0.0619024	-0.163268	-0.0573917	-0.192645	-0.171368	-0.0380063	-0.150401	-0.26708	-0.229382	-0.106249	0.021718	0.145598	0.0742062	0.00768427	-0.128837	-0.163949	-0.190572			yes
Q9JJN5	CPN1	Q9JJN5_CPN1	-0.0634092	-0.0985055	0.0271541	-0.018878	-0.293359	-0.207561	0.0949116	-0.26708	-0.265345	-0.24127	-0.358454	-0.0262051	-0.251539	-0.415038	-0.45799	-0.356606	-0.510457	-0.608232	0.00208298	0.239992	0.0583077	0.000745263	-0.224201	-0.210395	-0.44308			yes	Yes
Q5U5I3	MRPS18A	Q5U5I3_MRPS18A	-0.0247367	-0.0439433	-0.12658	0.0827026	0.0565835	0.112367	0.0799754	-0.112475	0.134878	0.134878	0.370722	0.0854247	0.177599	0.124328	0.369606	0.163499	0.24245	0.356144	0.00269993	0.481236	0.0204893	0.00168047	0.114315	0.169218	0.333637			yes
A0A286YDB3	TBC1D5	A0A286YDB3_TBC1D5	-0.0380063	-0.0573917	-0.0877334	-0.0174171	-0.0101344	0.0799754	-0.0409718	0.041243	0.0593553	0.015783	0.0867838	0.0086303	-0.046921	0.144046	0.166073	0.102994	0.112367	0.0257376	0.0156916	0.151583	0.0725192	0.00525665	0.088942	0.063482	0.15538			yes
P12246	APCS	P12246_APCS	-0.0740006	0.348232	-0.351074	-0.0709665	0.0468403	0.889084	0.812293	-0.488026	-0.134477	1.99747	1.71809	2.00072	1.62807	-0.274041	-0.309359	-0.479955	-0.110916	-0.190997	0.00485677	0.860365	0.00975399	0.905408	0.119324	1.79057	-0.177694		yes
Q6Y5D8	ARHGAP10	Q6Y5D8_ARHGAP10	-0.100051	-0.0159576	-0.00723157	-0.155213	-0.00288828	0.0703893	-0.0724828	-0.00723157	0.0200577	-0.0174171	-0.018878	-0.0454314	0.0565835	-0.0262051	0.130931	0.107018	0.0840643	0.0690147	0.00244336	0.116683	0.212203	0.000820592	0.055116	0.0391263	0.153545			yes	Yes
Q8BP27	SFR1	Q8BP27_SFR1	-0.0232698	-0.00578235	-0.00288828	-0.0454314	-0.0484122	-0.0709665	-0.107803	-0.0908029	-0.0923402	-0.0846703	-0.115597	-0.222633	-0.101598	-0.14401	-0.166503	-0.115597	-0.171368	-0.0923402	0.00135406	0.0620252	0.00125363	0.00153905	-0.0762768	-0.101071	-0.126524		yes	yes
Q9QZN4	FBXO6	Q9QZN4_FBXO6	-0.14401	-0.286304	-0.281036	-0.189351	-0.120294	-0.181149	-0.136062	-0.0291463	-0.190997	-0.00144342	0.0172093	-0.100051	-0.134477	-0.0320936	-0.194295	-0.129734	-0.0543923	-0.16004	0.0110887	0.116946	0.00331008	0.158096	0.0991315	0.2031	0.0903065		yes
Q9D898	ARPC5L	Q9D898_ARPC5L	-0.0247367	0.0690147	-0.0619024	-0.00723157	-0.132894	-0.112475	-0.177882	-0.0969617	-0.0831412	-0.101598	-0.0877334	-0.171368	-0.147202	-0.177882	-0.142417	-0.118727	-0.236164	-0.234465	0.000952341	0.00837392	0.00320845	0.000358211	-0.0964909	-0.131218	-0.172457	yes	yes	yes
A2AS37	AI182371	A2AS37_AI182371	-0.0892673	0.0313952	-0.0800879	-0.0664274	-0.21927	-0.187707	0.0538064	-0.304006	-0.212568	-0.0785637	-0.153607	-0.0573917	-0.164884	-0.522841	-0.459973	-0.354759	-0.388355	-0.512514	0.00832669	0.384328	0.268805	0.00302964	-0.13931	-0.0803493	-0.350906			yes
Q9QUK9	TRY5	Q9QUK9_TRY5	0.0285692	0.159629	0.0257376	-0.112475	-0.161653	-0.00578235	0.0356239	-0.0664274	0.0908534	0.00575927	0.045443	0.121679	-0.166503	-0.189351	-0.28279	-0.279284	-0.24127	-0.186065	0.0110954	0.839436	0.707319	0.00668624	-0.0329357	-0.0213941	-0.28743			yes
Q9JKS4-6	LDB3	Q9JKS4-6_LDB3	-0.109359	0.282143	0.151859	-0.155213	-0.0335695	-0.21927	-0.174621	0.132248	0.133564	-0.177882	-0.226004	-0.22095	-0.226004	0.00575927	-0.395929	-0.450084	-0.706041	-0.367732	0.00169358	0.818236	0.155423	0.00107063	-0.0548195	-0.2422	-0.444256			yes
Q9WV85	NME3	Q9WV85_NME3	-0.00723157	-0.086201	-0.0740006	-0.0588937	-0.0694519	-0.109359	-0.150401	-0.152003	-0.164884	-0.0969617	-0.0573917	-0.0484122	-0.210897	-0.0101344	-0.195946	-0.305788	-0.237864	-0.272297	0.000637022	0.146567	0.768064	0.000436422	-0.0839539	0.00905545	-0.188633			yes	Yes	Yes
S4R1J0	SCHIP1	S4R1J0_SCHIP1	0.0799754	0.167358	0.112367	0.146655	0.132248	-0.129734	0.0313952	-0.101598	-0.0664274	-0.018878	-0.0694519	0.0745054	0.0840643	0.00575927	-0.281036	-0.164884	-0.0203404	-0.0335695	0.0109474	0.0571242	0.194596	0.00382506	-0.195938	-0.123752	-0.228738			yes
Q62384	ZPR1	Q62384_ZPR1	0.0676387	0.00288251	0.00432161	0.0648829	0.149259	0.159629	0.0867838	0.0731347	0.116365	0.102994	0.115033	0.0538064	0.051024	0.0200577	0.166073	0.194087	0.214125	0.197865	8.8876e-05	0.00898473	0.364619	3.48673e-05	0.0817627	0.0192041	0.161374	yes		yes
A0A0R4J1W7	CDC23	A0A0R4J1W7_CDC23	-0.0409718	-0.103147	-0.129734	-0.0694519	-0.0513992	-0.106249	0.0200577	-0.00433459	-0.0588937	-0.0543923	0.0071955	-0.0558912	-0.0218044	-0.0380063	-0.00288828	0.0299829	0.10165	0.0356239	0.00462566	0.251965	0.15979	0.00153691	0.0349003	0.0482931	0.119103			yes
P0DJE0	PET100	P0DJE0_PET100	-0.0424568	0.0299829	0.128293	0.0565835	-0.261881	-0.205896	-0.232769	-0.158429	-0.139236	-0.129734	-0.15682	-0.166503	-0.307573	-0.177882	-0.236164	-0.362158	-0.397828	-0.481968	1.7747e-05	0.000663003	0.0009734	5.11831e-06	-0.249179	-0.209786	-0.423276	yes	yes	yes
Q6P3D0	NUDT16	Q6P3D0_NUDT16	-0.0816138	-0.0262051	-0.027675	-0.027675	0.0482362	0.145351	0.0551957	0.0690147	0.0271541	-0.0101344	0.126973	0.00575927	0.0243197	0.15056	0.0482362	0.104337	0.115033	0.0813396	0.0109964	0.014027	0.0245027	0.00730704	0.0828707	0.0519947	0.120513			yes
A0A0R4J1N0	DPYSL4	A0A0R4J1N0_DPYSL4	-0.115597	-0.00144342	0.0214797	-0.0846703	-0.0908029	-0.21424	-0.107803	-0.0724828	-0.0664274	-0.229382	-0.215915	-0.199255	-0.155213	-0.0954196	-0.117161	-0.182786	-0.128156	-0.117161	0.0196259	0.220897	0.00699833	0.0821254	-0.047746	-0.156198	-0.0796016		yes
Q80VJ2	SRA1	Q80VJ2_SRA1	-0.00433459	-0.0543923	-0.0335695	-0.0365259	0.0243197	0.136191	0.0524159	-0.0306192	-0.0101344	0.255803	0.318461	0.222805	0.0786098	0.077243	0.123004	0.129613	0.0200577	0.0071955	0.00366576	0.422597	0.00148737	0.169279	0.0593674	0.257853	0.106579		yes
Q64337	SQSTM1	Q64337_SQSTM1	-0.0232698	0.0172093	0.0214797	-0.0262051	-0.0619024	-0.0365259	0.0676387	-0.046921	0.041243	-0.0350469	0.0976108	0.125651	-0.0218044	-0.011588	0.454176	0.374066	0.337996	0.166073	3.31233e-05	0.999427	0.844286	9.50855e-05	-0.0334957	-0.00855775	0.359061			yes
Q9EQ06	HSD17B11	Q9EQ06_HSD17B11	0.15056	0.00144197	0.105678	-0.046921	0.212881	0.413594	0.199123	0.22033	0.189034	0.24245	0.304511	0.299831	0.0717627	0.389567	0.423309	0.258217	0.396159	0.176323	0.0176136	0.0401932	0.0272336	0.00968423	0.159321	0.246271	0.273628			yes	Yes
Q9WUL7	ARL3	Q9WUL7_ARL3	0.00288251	0.0976108	0.0370307	0.0565835	0.0579701	-0.0694519	-0.106249	0.0745054	0.00144197	-0.0908029	-0.115597	-0.260152	-0.101598	-0.0484122	0.0271541	-0.0247367	-0.00144342	0.104337	0.00822832	0.470703	0.00543168	0.935159	-0.0453651	-0.148405	-0.0339518		yes
Q8VC19	ALAS1	Q8VC19_ALAS1	-0.110916	-0.0892673	-0.0335695	-0.0159576	-0.573467	-0.186065	-0.599462	-0.62371	-0.567041	-0.0679388	-0.586406	-0.272297	-0.58208	-0.571322	-0.586406	-0.710756	-0.841663	-0.648372	0.000852303	0.00400109	0.0188013	0.000350223	-0.512049	-0.509904	-0.618146	yes		yes	Yes
P02301	H3F3C	P02301_H3F3C	0.00432161	-0.00433459	0.176323	-0.0877334	-0.0619024	0.23634	0.238787	-0.109359	0.116365	0.176323	0.225275	0.157044	0.302173	0.238787	0.525067	0.306845	0.399445	0.441483	0.000973456	0.751289	0.052665	0.00067511	0.116371	0.225281	0.42047			yes
Q91WP0	MASP2	Q91WP0_MASP2	0.0398403	-0.100051	-0.189351	0.0745054	-0.2567	-0.367732	0.0086303	-0.217591	-0.272297	-0.189351	-0.343732	-0.246395	-0.327348	-0.395929	-0.121863	-0.152003	-0.207561	-0.272297	0.0239781	0.0689857	0.00856755	0.181448	-0.226595	-0.297243	-0.149677		yes
Q9D1R1	TMEM126B	Q9D1R1_TMEM126B	-0.0291463	-0.139236	-0.0877334	-0.077041	-0.0232698	0.0299829	-0.0101344	-0.0159576	-0.0218044	0.121679	0.125651	0.104337	0.100305	0.16092	0.132248	0.136191	0.207893	0.364012	1.44523e-05	0.162332	0.000281085	1.75675e-05	0.0664296	0.204066	0.254429		yes	yes
G3X8T2	ZC3H18	G3X8T2_ZC3H18	-0.0588937	-0.027675	-0.0558912	-0.0831412	-0.224317	-0.158429	-0.15682	-0.011588	-0.109359	-0.195946	-0.0892673	-0.15682	0	-0.0306192	0.206643	0.0881416	0.0799754	0.134878	0.000311472	0.258067	0.730916	0.00470333	-0.0994275	-0.0318748	0.168902			yes
P21460	CST3	P21460_CST3	-0.215915	-0.16004	-0.0603973	-0.349235	-0.321928	-0.00723157	-0.244685	0.0426443	-0.00144342	-0.272297	-0.0649175	-0.118727	-0.0649175	0.0635029	0.100305	0.0384362	0.254594	0.290424	0.0100447	0.631954	0.524317	0.0047265	0.180746	0.12306	0.365427			yes
Q8BKI2	TNRC6B	Q8BKI2_TNRC6B	-0.0484122	-0.027675	0.0200577	-0.0603973	-0.0664274	0.100305	0.0214797	0.0271541	0.00575927	0.0328061	0.0607392	0.0468403	0.0299829	0.0172093	0.119024	0.123004	0.0854247	0.0271541	0.0112839	0.26639	0.0813875	0.0039341	0.0595233	0.0708497	0.140268			yes
Q641P0	ACTR3B	Q641P0_ACTR3B	-0.0247367	0.0635029	-0.0664274	-0.0499049	-0.121863	-0.0694519	-0.15682	-0.234465	-0.128156	-0.205896	-0.0923402	-0.237864	-0.182786	-0.205896	-0.142417	-0.145605	-0.365871	-0.305788	0.00522056	0.06341	0.0121414	0.00221393	-0.0908352	-0.168575	-0.188376			yes
Q3UZR5	ATP2C1	Q3UZR5_ATP2C1	0.0635029	-0.0101344	0.051024	-0.00868224	0.102994	0.412511	0.163499	0.321928	0.288063	0.0867838	0.0593553	0.0690147	0.260628	0.358396	0.259423	0.334568	0.426533	0.308011	0.00544975	0.0128958	0.144024	0.00264514	0.266892	0.0656129	0.300119			yes	Yes
Q8BGV8	MIEF1	Q8BGV8_MIEF1	-0.0101344	0.0621217	0.0342157	0.00432161	-0.0619024	0.0114956	-0.0380063	-0.0394883	0.0271541	0.00144197	0.0299829	0.109695	0.0579701	0.0100637	0.129613	0.0827026	0.171207	0.111031	0.000633555	0.261382	0.791137	0.0059744	-0.057275	0.0107142	0.101053			yes
Q9CZ28	SNF8	Q9CZ28_SNF8	0.0648829	0.0342157	0.0129262	0.0468403	0.0313952	-0.0954196	-0.0846703	-0.107803	-0.0409718	-0.0365259	-0.112475	-0.0831412	-0.0424568	-0.244685	-0.0159576	-0.0846703	0.0200577	-0.013043	0.0183712	0.061654	0.00724636	0.327401	-0.125198	-0.123669	-0.0550283		yes
Q99JF5	MVD	Q99JF5_MVD	0.0243197	0.115033	0.176323	0.377401	0.0172093	-0.169745	-0.194295	-0.634867	-0.302226	-0.0954196	-0.246395	-0.516636	-0.0816138	-0.150401	-0.454032	-1.07704	-0.234465	-0.710756	0.00376386	0.0473049	0.0735647	0.00105618	-0.339973	-0.296079	-0.728072			yes	Yes
Q8C3S2	TANGO6	Q8C3S2_TANGO6	-0.246395	-0.76366	-1.3474	-0.452057	-0.461959	-1.24811	-0.321928	-0.139236	-0.982791	-0.424688	-0.935117	-0.0291463	-0.0380063	-0.187707	0.522056	0.337996	0.0538064	0.22033	0.0128401	0.985837	0.378134	0.00964394	0.145899	0.420151	0.887021			yes
P30115	GSTA3	P30115_GSTA3	0.0786098	0.015783	0.321928	-0.140826	-0.172994	-0.190997	-0.15682	-0.261881	-0.120294	-0.356606	-0.21424	-0.192645	-0.309359	-0.430509	0.0635029	-0.0262051	-0.1976	-0.117161	0.00272412	0.0192668	0.00114178	0.27161	-0.22019	-0.356555	-0.118879		yes		Yes
Q8VI75	IPO4	Q8VI75_IPO4	-0.0558912	0.00144197	0.0257376	-0.0649175	-0.0247367	-0.0174171	0.0593553	-0.00723157	0.0579701	0.0894981	0.0398403	-0.00868224	-0.00144342	-0.0101344	0.107018	0.0881416	0.133564	0.134878	0.00130281	0.38322	0.241661	0.000581572	0.019993	0.0257812	0.147516			yes
Q8K0L0	ASB2	Q8K0L0_ASB2	0.0370307	0.045443	-0.0365259	0.0440443	-0.0306192	-0.194295	-0.140826	-0.227692	-0.168123	-0.199255	-0.166503	-0.26708	-0.189351	-0.106249	-0.205896	-0.275786	-0.272297	-0.258425	4.76808e-05	0.00108874	0.000213865	3.00249e-05	-0.20866	-0.229888	-0.305899	yes	yes	yes
P55065	PLTP	P55065_PLTP	-0.281036	0.117695	-0.011588	-0.128156	-0.739372	-0.323733	-0.16004	-0.529073	-0.442222	-0.514573	-0.488026	-0.749038	-0.687335	-0.736966	-0.334607	-0.182786	-0.671164	-0.573467	0.00468587	0.0291095	0.00147754	0.0380508	-0.37235	-0.617463	-0.384165		yes
G3X9Y9	MYO5B	G3X9Y9_MYO5B	0.0143553	0.0328061	-0.121863	0.0717627	-0.0740006	-0.248108	0.0384362	-0.177882	-0.296899	-0.150401	-0.330973	-0.14401	-0.190997	-0.295128	-0.341903	-0.275786	-0.190997	-0.351074	0.00654899	0.0990754	0.0134943	0.00302814	-0.201463	-0.214578	-0.332425			yes
Q80W82	MAPK10	Q80W82_MAPK10	0.0468403	-0.0335695	-0.00723157	-0.00723157	-0.171368	-0.110916	-0.0740006	-0.139236	-0.115597	-0.179515	-0.0558912	-0.118727	-0.186065	-0.0394883	-0.086201	-0.118727	-0.172994	-0.112475	0.00484223	0.00482032	0.00665594	0.00662407	-0.108365	-0.111495	-0.108369	yes	yes	yes	Yes	Yes
Q8CGU1	CALCOCO1	Q8CGU1_CALCOCO1	0.0114956	-0.0513992	-0.0439433	0.00144197	-0.0335695	0.0565835	0.0257376	0.0172093	-0.0320936	0.0593553	0.0551957	-0.00578235	0.0071955	-0.179515	0.457332	0.415759	0.24123	0.16221	0.000131755	0.932551	0.998063	0.000262051	0.03846	0.0284462	0.349745			yes
Q8R310	TMCC3	Q8R310_TMCC3	-0.375197	-0.186065	-0.428566	-0.463947	-0.508403	-0.392137	-0.424688	-0.0365259	-0.340075	-0.375197	-0.332789	-0.300448	0.299831	0.0214797	0.304511	0.22404	0.246104	0.10165	0.00253651	0.995762	0.238574	0.00239192	0.0097445	0.101434	0.636953			yes
E9PUI5	FNBP1L	E9PUI5_FNBP1L	-0.0588937	-0.139236	-0.215915	-0.0985055	-0.0679388	-0.0908029	0.0229004	-0.101598	-0.0785637	-0.0350469	-0.136062	0.107018	0.0384362	-0.109359	0.0593553	0.00432161	0.144046	0.140124	0.00812711	0.441704	0.146708	0.00309309	0.040307	0.0838239	0.21861			yes
Q05020	APOC2	Q05020_APOC2	0.0356239	-0.106249	0.0143553	0.0285692	-0.442222	-0.106249	0.204141	-0.456009	-0.268817	-0.0350469	0.0143553	-0.152003	-0.295128	-0.608232	-0.818579	-0.746616	-0.710756	-1.0619	0.000474963	0.361387	0.356302	0.000275775	-0.290279	-0.173465	-0.80406			yes
E9PVM1	INPP4B	E9PVM1_INPP4B	0.0071955	-0.0877334	-0.0101344	-0.0800879	0.0593553	0.0313952	0.0593553	-0.0350469	-0.0159576	-0.0619024	0.0370307	-0.0634092	-0.0923402	-0.0439433	0.0922074	0.104337	0.0731347	0.0482362	0.00234805	0.114371	0.999636	0.00345166	0.0765064	-0.0167913	0.127782			yes	Yes		Yes
J3QMX0	RPP14	J3QMX0_RPP14	0.112367	0.169925	0.166073	0.0922074	0.149259	0.10165	0.0370307	0.121679	0.157044	0.0894981	-0.0424568	-0.027675	0.0214797	0.0648829	0.0172093	-0.0634092	0.00144197	0.0257376	0.001494	0.828468	0.0079049	0.00262888	-0.017541	-0.11774	-0.129894		yes	yes	Yes
Q9DBL9	ABHD5	Q9DBL9_ABHD5	-0.00288828	0.0299829	0.015783	0.0271541	-0.650635	-0.862496	-0.650635	-0.378944	-0.369595	-1.01742	-0.836501	-0.793357	-1.07097	-0.84944	-0.312939	-0.937878	-1.01742	-1.00289	4.7369e-05	0.00174352	2.25723e-05	0.000168948	-0.672104	-0.870909	-0.991853	yes	yes	yes	Yes
Q6DVA0	LEMD2	Q6DVA0_LEMD2	-0.011588	-0.0424568	0.0342157	0.0328061	0.0949116	0.0468403	0.183963	-0.0424568	0.0538064	0.255803	0.141433	0.113701	0.201634	0.238787	0.344828	0.105678	0.276199	0.189034	0.00200378	0.453284	0.00594413	0.00218816	0.0431973	0.191025	0.222007		yes	yes
Q9Z0J0	NPC2	Q9Z0J0_NPC2	-0.107803	-0.0679388	0.0186342	-0.106249	0.0200577	0.108357	0.155749	0.145351	-0.0484122	0.185232	0.0799754	0.0731347	0.226509	-0.027675	0.190299	0.222805	0.349365	0.226509	0.0010627	0.0567617	0.0196121	0.000272356	0.195451	0.167069	0.311751			yes
P14115	RPL27A	P14115_RPL27A	-0.0877334	-0.168123	0.136191	0.0731347	-0.046921	0.329985	0.295135	-0.00433459	0.253384	0.361768	0.194087	0.321928	0.331132	0.326537	0.369606	0.387363	0.163499	0.413594	0.0072668	0.149289	0.00723541	0.0060897	0.260683	0.333836	0.385784		yes	yes
E9PVU7	PDE4D	E9PVU7_PDE4D	0.041243	0.116365	0.0285692	-0.112475	-0.0985055	-0.0262051	0.0200577	-0.0439433	-0.07552	-0.0877334	-0.152003	-0.140826	-0.0619024	-0.189351	0.0496308	-0.0785637	-0.0306192	-0.00868224	0.0213866	0.329775	0.00999059	0.756331	-0.0788494	-0.175732	-0.0545568		yes		Yes
Q61268	APOC4	Q61268_APOC4	-0.0528949	0.105678	0.0214797	-0.207561	-0.486004	-0.424688	-0.0800879	-0.773491	-0.556393	-0.430509	-0.268817	-0.586406	-0.461959	-0.985645	-0.753896	-0.886299	-0.710756	-0.768568	0.00149319	0.0214227	0.00695649	0.000484429	-0.470296	-0.446251	-0.745524		yes	yes
Q9DBG9	TAX1BP3	Q9DBG9_TAX1BP3	0.0854247	-0.00433459	0.0285692	0.0551957	0.128293	0.14274	0.0976108	0.195348	-0.0218044	0.153157	0.181421	0.149259	0.215368	0.0786098	0.24245	0.314986	0.230203	0.37629	0.000442573	0.286802	0.0406559	0.000213643	0.0864105	0.111275	0.236836			yes
O09167	RPL21	O09167_RPL21	-0.22095	-0.164884	0.0440443	-0.00433459	-0.086201	0.211635	0.0935602	-0.107803	0.166073	0.230203	0.0271541	0.266637	0.275007	0.263034	0.195348	0.115033	-0.00288828	0.169925	0.0162448	0.221547	0.00586621	0.0702971	0.178169	0.347643	0.227088		yes
B2RUS7	ABCC8	B2RUS7_ABCC8	-0.0291463	-0.209228	0.0496308	-0.0649175	0.00432161	0.206643	0.157044	-0.0262051	0.0894981	-0.0144996	0.115033	0.0635029	0.104337	0.237564	0.158337	0.279768	0.171207	0.138814	0.0137167	0.0732185	0.0468873	0.00494174	0.13653	0.151369	0.211804			yes
Q9DBE8	ALG2	Q9DBE8_ALG2	-0.155213	-0.164884	-0.0923402	-0.161653	-0.0101344	0.0200577	-0.0877334	-0.195946	-0.027675	-0.00868224	-0.0694519	-0.0350469	0.0745054	-0.018878	0.0243197	-0.0247367	0.0593553	-0.0409718	0.0138973	0.135541	0.0140261	0.00948684	0.130758	0.139555	0.158224			yes
Q9Z1R3	APOM	Q9Z1R3_APOM	0.0922074	0.134878	0.0799754	0	0.454176	0.900722	1.26604	0.644318	0.64524	0.97673	1.08542	1.26303	0.9115	0.792439	0.27858	0.530071	0.435095	0.120352	5.25317e-05	0.000608509	3.8096e-05	0.223222	0.559149	0.890639	0.270746	yes	yes
Q9Z319	CORIN	Q9Z319_CORIN	0.0129262	-0.0543923	0.077243	-0.0634092	-0.0306192	0.0690147	0.108357	0.0285692	0.0370307	0.112367	0.0200577	0.0356239	0.0827026	0.176323	0.166073	0.100305	0.163499	0.154454	0.00910341	0.416099	0.0612769	0.00395848	0.0577637	0.103436	0.17971			yes
Q8BFR4	GNS	Q8BFR4_GNS	0.0384362	0.0703893	0.0551957	0.0384362	0.136191	0.104337	0.0482362	0.116365	0.0786098	0.0468403	0.0621217	0.0342157	0.104337	0.0786098	0.204141	0.190299	0.146655	0.200379	2.53567e-05	0.0612357	0.761299	1.2108e-05	0.0575211	0.0153058	0.148523			yes	Yes
Q5M6W3	CLHC1	Q5M6W3_CLHC1	0.141433	0.157044	0.273814	0.498761	0.0648829	0.0731347	-0.234465	-0.562772	-0.289827	-0.101598	-0.110916	-0.717857	-0.0144996	-0.0694519	-0.479955	-0.962969	-0.341903	-0.785875	0.0021431	0.0492629	0.0428397	0.000559948	-0.449894	-0.317027	-0.848344			yes
Q9QZE7	TSNAX	Q9QZE7_TSNAX	0.0384362	0.0342157	0.0703893	-0.0203404	-0.101598	-0.0679388	-0.0380063	0.0071955	-0.0247367	-0.107803	-0.153607	-0.289827	-0.0816138	-0.0908029	0.0881416	-0.0558912	-0.0816138	-0.00433459	0.00665302	0.224376	0.00295065	0.644556	-0.0743322	-0.144129	-0.0664388		yes
A0A0R4J1J1	PNKD	A0A0R4J1J1_PNKD	0.00575927	-0.104697	-0.0454314	0.0143553	-0.227692	-0.288065	-0.298673	-0.204233	-0.207561	-0.0740006	-0.093879	-0.24127	-0.187707	-0.110916	-0.189351	-0.251539	-0.28279	-0.103147	0.00120119	0.00054709	0.054147	0.00428155	-0.207856	-0.0910799	-0.200609	yes		yes
Q9DBN4	P33MONOX	Q9DBN4_P33MONOX	-0.152003	0.0894981	0.0703893	0.00144197	-0.0892673	-0.330973	-0.295128	-0.125006	-0.093879	-0.176251	-0.248108	-0.392137	-0.232769	-0.142417	-0.148801	-0.115597	-0.205896	-0.217591	0.0160319	0.0304947	0.00676933	0.0606134	-0.160922	-0.268685	-0.213264		yes
Q91WE2	FAM192A	Q91WE2_FAM192A	-0.109359	-0.106249	-0.093879	-0.186065	-0.0679388	0.0717627	-0.150401	0.00144197	0.0086303	-0.077041	-0.0846703	-0.120294	-0.00433459	-0.0424568	0.345964	0.186501	-0.00433459	-0.011588	0.013382	0.335848	0.693214	0.00609478	0.109246	0.030763	0.198887			yes
P28867-2	PRKCD	P28867-2_PRKCD	-0.0892673	-0.123434	0.0172093	-0.0846703	0.0328061	0.304511	0.189034	0.261832	0.167358	-0.0218044	0.175045	0.136191	0.166073	0.182692	0.149259	0.266637	0.206643	0.0813396	0.00207801	0.00131613	0.0101794	0.0031407	0.276003	0.253042	0.26492	yes		yes	Yes	Yes
Q9Z321	TOP3B	Q9Z321_TOP3B	0.00288251	-0.0499049	-0.0174171	-0.0573917	-0.142417	-0.129734	-0.100051	-0.107803	-0.112475	-0.0603973	-0.0454314	-0.147202	-0.123434	-0.104697	-0.027675	-0.0218044	-0.0740006	-0.0877334	0.00393637	0.00287732	0.0203083	0.630394	-0.078814	-0.071036	-0.0171768	yes			Yes
A0A0R4J131	BTD	A0A0R4J131_BTD	-0.117161	-0.0203404	0.0257376	0.0398403	-0.237864	-0.0306192	-0.046921	-0.145605	-0.163268	-0.210897	-0.236164	-0.424688	-0.204233	-0.21424	-0.100051	-0.086201	-0.258425	-0.263612	0.00869267	0.207431	0.00303561	0.0560566	-0.148304	-0.216939	-0.181937		yes		Yes
P27659	RPL3	P27659_RPL3	-0.260152	-0.314733	0.258217	0.119024	-0.132894	0.475085	0.706641	0.199123	0.408168	0.804054	0.211635	0.844787	0.829444	0.482332	0.630405	0.744161	0.649845	1.16221	0.00405681	0.154237	0.00783952	0.00244489	0.478732	0.874618	0.767567		yes	yes
P16546	SPTAN1	P16546_SPTAN1	-0.0513992	-0.00433459	0.0854247	-0.0499049	-0.0380063	0.140124	0.0482362	0.0186342	-0.0350469	0.125651	0.211635	0.0607392	0.253384	-0.0203404	0.424385	0.361768	0.233888	0.211635	0.000866419	0.90917	0.113608	0.000697028	0.0457539	0.152771	0.324948			yes
Q8BVI5	STX16	Q8BVI5_STX16	-0.0649175	-0.21424	-0.0394883	-0.121863	0.0229004	0.109695	0.0482362	-0.0335695	0.0143553	0.0328061	-0.0101344	-0.0954196	0.0881416	0.246104	0.124328	0.0593553	0.194087	0.0949116	0.0143139	0.0663504	0.0347434	0.00576852	0.116291	0.126196	0.20301			yes
P62892	RPL39	P62892_RPL39	-0.109359	-0.0694519	0.0243197	0.146655	0.0114956	0.115033	0.202888	-0.172994	0.146655	0.347099	0.15056	0.364012	0.269033	0.267835	0.187768	0.183963	0.171207	0.358396	0.00657894	0.741763	0.00599766	0.0327174	0.137599	0.291599	0.208432		yes
Q9D823	RPL37	Q9D823_RPL37	-0.316528	-0.12658	0.157044	0.186501	-0.0679388	0.0894981	0.342555	0.0299829	0.318461	0.649845	0.24123	0.550901	0.469886	0.444667	0.410341	0.24732	0.0129262	0.483364	0.0115328	0.446988	0.00494303	0.0920784	0.0742661	0.454654	0.313599		yes
Q9D6Z0	ALKBH7	Q9D6Z0_ALKBH7	-0.153607	-0.0159576	0.0243197	-0.0954196	-0.0649175	-0.14401	-0.174621	-0.00433459	-0.0499049	-0.0409718	-0.011588	-0.237864	-0.153607	-0.0679388	-0.212568	-0.268817	-0.265345	-0.302226	0.00682836	0.897875	0.726756	0.00469444	-0.0092289	-0.0122502	-0.211392			yes	Yes
A0A0U1RP81	IMMT	A0A0U1RP81_IMMT	-0.0664274	-0.15682	0.0299829	-0.0558912	-0.194295	-0.28279	-0.189351	-0.125006	-0.210897	-0.158429	-0.21927	-0.321928	-0.212568	-0.192645	-0.16004	-0.207561	-0.121863	-0.0954196	0.00837518	0.0117914	0.00456742	0.167373	-0.133136	-0.151409	-0.0797922		yes
P60766-1	CDC42	P60766-1_CDC42	0.0285692	-0.0846703	0.0496308	0.00575927	0.045443	0.0894981	0.137504	-0.0740006	-0.00433459	0.250962	0.121679	0.112367	0.235114	0.348232	0.209141	0.197865	0.316146	0.305679	0.000535627	0.798652	0.00329132	0.0011814	0.0282788	0.21795	0.240246		yes	yes
Q08AU7	MYADML2	Q08AU7_MYADML2	-0.0969617	-0.164884	-0.237864	-0.140826	-0.0499049	-0.181149	-0.236164	-0.0923402	0.00432161	0.0285692	0.0538064	0.0908534	0.140124	0.432959	0.341417	0.0745054	0.24732	0.190299	0.000606594	0.862165	0.00400725	0.00142192	0.0605148	0.243708	0.371665		yes	yes
B5THE2	MGAM	B5THE2_MGAM	0.0867838	-0.0694519	-0.0454314	0.325386	-0.101598	-0.21424	0.316146	-0.195946	0.00288251	-0.32916	-0.498179	-0.351074	-0.471929	-0.390245	-0.204233	-0.110916	-0.227692	-0.545824	0.0034641	0.642093	0.00246387	0.0325715	-0.122274	-0.410921	-0.236639		yes		Yes
P31809	CEACAM1	P31809_CEACAM1	0.100305	-0.0174171	0.0565835	-0.0513992	0.115033	0.134878	0.200379	0.226509	0.149259	0.14274	0.240009	0.244887	0.313826	0.468844	0.382944	0.134878	0.273814	0.298658	0.00288063	0.0786925	0.00198901	0.00399935	0.129676	0.225304	0.266653		yes	yes
Q9WTX8	MAD1L1	Q9WTX8_MAD1L1	-0.0724828	-0.00288828	0.0370307	-0.168123	0.0200577	-0.109359	-0.0649175	0.0214797	-0.0144996	-0.0424568	-0.027675	-0.131313	-0.00723157	-0.0513992	0.153157	0.117695	0.0745054	0.0745054	0.00550546	0.897992	0.999999	0.00644783	0.0231859	-0.00477126	0.133786			yes
E9QNQ2	ANKRD44	E9QNQ2_ANKRD44	-0.0424568	-0.14401	-0.104697	-0.158429	0.00432161	-0.0365259	-0.115597	-0.011588	0.168642	-0.275786	-0.0846703	-0.0159576	0.0593553	-0.0619024	0.130931	0.121679	0.158337	0.180148	0.00521127	0.187256	0.873688	0.00323694	0.112766	0.0624511	0.268987			yes	Yes		Yes
P26323	FLI1	P26323_FLI1	-0.00288828	-0.086201	-0.125006	-0.0394883	-0.00144342	0.126973	0.0257376	0.138814	0.0989585	-0.0203404	0.123004	-0.0320936	0.0676387	-0.0439433	0.0922074	0.22404	0.0662614	0.0840643	0.00875798	0.0168726	0.192942	0.00473864	0.161803	0.0425043	0.15098			yes
Q99KS6	ADPRM	Q99KS6_ADPRM	-0.0159576	0.015783	0.0524159	0.0229004	0.116365	0.0786098	0.0949116	-0.0454314	0.0621217	0.136191	-0.0291463	0.14274	0.222805	0.0342157	0.178874	0.16092	0.323082	0.303342	0.00470475	0.727457	0.268581	0.00238715	0.0592681	0.116849	0.221766			yes	Yes		Yes
P08775	POLR2A	P08775_POLR2A	-0.132894	-0.123434	-0.118727	-0.209228	-0.046921	-0.131313	-0.103147	0.0621217	-0.115597	-0.112475	-0.129734	-0.140826	-0.0664274	0.0186342	0.115033	0.0328061	0.0962619	-0.0679388	0.0123271	0.248951	0.448527	0.00457911	0.025017	0.015689	0.192698			yes
Q52KI8	SRRM1	Q52KI8_SRRM1	-0.0846703	-0.00723157	-0.0159576	-0.0923402	0.0172093	-0.0892673	-0.0262051	0.0593553	-0.00868224	-0.0724828	-0.00433459	0.0086303	0.0214797	0.153157	0.146655	0.0648829	0.0908534	0.108357	0.0157837	0.610557	0.209234	0.00673217	0.0416317	0.0589443	0.149919			yes
Q6VGS5-2	CCDC88C	Q6VGS5-2_CCDC88C	0.120352	0.0086303	-0.0484122	-0.086201	-0.171368	-0.153607	-0.263612	-0.093879	-0.0954196	-0.147202	-0.0892673	-0.263612	-0.217591	-0.00144342	-0.215915	-0.140826	-0.516636	-0.682696	0.0131434	0.278464	0.334064	0.00454658	-0.133716	-0.127311	-0.346385			yes
Q3TCX3	KIAA0907	Q3TCX3_KIAA0907	-0.0908029	-0.181149	-0.148801	-0.046921	-0.200913	-0.174621	-0.142417	-0.199255	-0.0724828	-0.0528949	-0.0558912	-0.163268	-0.0159576	0.132248	0.147958	0.0565835	-0.0291463	0.175045	0.00295643	0.790063	0.303355	0.00857095	-0.0548191	0.066907	0.222073			yes
Q8BK48	CES2E	Q8BK48_CES2E	0.0299829	-0.0816138	-0.0543923	-0.0454314	-0.475936	-0.177882	-0.0573917	-0.260152	-0.26708	-0.340075	-0.281036	-0.155213	-0.432455	-0.311148	-0.296899	-0.158429	-0.263612	-0.397828	0.0137546	0.0331249	0.00768351	0.0204177	-0.21024	-0.261236	-0.230344		yes
Q8C5N3	CWC22	Q8C5N3_CWC22	-0.0424568	-0.0969617	0.045443	0.0758749	0.180148	0.149259	0.115033	0.176323	0.10165	0.00432161	0.137504	-0.0409718	0.105678	0.0854247	0.331132	0.286881	0.180148	0.119024	0.00229281	0.0219106	0.446464	0.00125216	0.147766	0.0839316	0.232021			yes
Q9CR27	WASHC3	Q9CR27_WASHC3	0.0854247	-0.0159576	-0.0247367	0.0621217	0.194087	0.0607392	0.0468403	0.0867838	0.0813396	0.0313952	0.041243	0.0496308	0.045443	0.077243	0.128293	0.104337	0.199123	0.123004	0.0153745	0.10793	0.802289	0.00974818	0.0582575	0.0223609	0.102566			yes
P52624	UPP1	P52624_UPP1	-0.0380063	-0.0335695	-0.131313	-0.0262051	0.113701	0.50284	0.192825	0.171207	0.199123	0.405992	0.520045	0.286881	0.361768	0.324235	0.279768	0.60502	0.638769	0.486457	9.56384e-05	0.00828177	0.000369187	3.35203e-05	0.228613	0.397556	0.581526	yes	yes	yes	Yes
Q2VLH6-2	CD163	Q2VLH6-2_CD163	0.0086303	-0.109359	0.243669	-0.444184	-0.100051	0.257011	0.212881	0.045443	0.0538064	0.187768	0.483364	0.27023	0.24732	0.487486	0.299831	0.280956	0.325386	0.192825	0.0143067	0.353131	0.00834407	0.0312726	0.104171	0.320594	0.340758		yes
P62915	GTF2B	P62915_GTF2B	-0.00578235	-0.0603973	-0.123434	-0.07552	0.0243197	0.0717627	0.0071955	-0.00433459	0.0635029	-0.0740006	-0.0174171	-0.107803	0.0894981	-0.0603973	0.0935602	0.128293	0.115033	0.196607	0.000568297	0.0408172	0.699643	0.000333315	0.0922784	0.00756135	0.189622			yes
Q8C119	NDNF	Q8C119_NDNF	0.163499	0.0593553	0.205393	-0.0380063	0.329985	0.505891	0.302173	0.265437	0.341417	0.385155	0.304511	0.113701	0.420078	0.575312	0.352759	0.714575	0.517024	0.264236	0.0208564	0.0567857	0.046327	0.00919422	0.218558	0.273728	0.323464			yes
Q8K3W0	BABAM2	Q8K3W0_BABAM2	-0.0350469	-0.0262051	-0.0454314	-0.0291463	0.0200577	0.0881416	0.169925	0.15056	0.0745054	0.0426443	0.0468403	0.0621217	0.0114956	0.0758749	0.0370307	0.0989585	0.112367	0.267835	0.00588845	0.00917564	0.122552	0.00344196	0.120238	0.0789369	0.137759	yes		yes
Q924H7	WAC	Q924H7_WAC	-0.181149	-0.0365259	-0.181149	0.015783	-0.139236	-0.0484122	-0.169745	0.0384362	-0.0694519	-0.046921	-0.125006	0.0129262	-0.046921	-0.0499049	0.186501	0.16092	0.104337	0.123004	0.000902689	0.961872	0.670866	0.000890298	0.0393856	0.0619165	0.250799			yes
Q7TQA1	IGSF1	Q7TQA1_IGSF1	0.0440443	0.00575927	-0.00288828	-0.0394883	0.0086303	-0.168123	-0.253257	-0.136062	-0.136062	-0.136062	-0.117161	-0.349235	-0.411195	-0.189351	-0.212568	-0.199255	-0.321928	-0.253257	0.00487882	0.0979552	0.00391333	0.00492047	-0.137497	-0.190786	-0.234348		yes	yes
Q8BJU2	TSPAN9	Q8BJU2_TSPAN9	0.0976108	-0.0484122	0.0285692	-0.12658	0.0214797	0.209141	0.16092	0.217851	0.157044	0.0328061	0.168642	0.173767	0.280956	0.611645	0.285698	0.348232	0.428678	0.347099	0.0109286	0.201305	0.027121	0.00495839	0.170842	0.183689	0.357587			yes
O55003	BNIP3	O55003_BNIP3	-0.027675	0.0257376	0.0356239	-0.0543923	0.0799754	0.21661	0.0867838	0.202888	0.336855	0.0071955	0.204141	-0.00288828	0.111031	0.748461	0.762987	0.588805	0.45628	0.350497	0.0110693	0.357612	0.257445	0.00388284	0.203857	0.112	0.523511			yes
Q5SX75	P4HA2	Q5SX75_P4HA2	-0.0320936	-0.0101344	-0.0394883	0.0551957	-0.0203404	-0.129734	-0.261881	-0.123434	-0.168123	-0.0335695	-0.179515	0.0200577	-0.21424	-0.137648	-0.340075	-0.179515	-0.244685	-0.500218	0.00414841	0.140144	0.304031	0.00144626	-0.10862	-0.116534	-0.271266			yes	Yes
Q921N8	GPS2	Q921N8_GPS2	0.172488	0.140124	0.21661	0.0662614	-0.0816138	-0.120294	-0.0649175	0.0607392	-0.0649175	0.0565835	0.0524159	-0.011588	0.166073	0.0299829	0.297485	0.249749	-0.0101344	0.176323	0.00471153	0.00854567	0.301573	0.925489	-0.221224	-0.10389	0.05673	yes
E9PWY8	MYZAP	E9PWY8_MYZAP	-0.07552	0.0299829	-0.0679388	0.0143553	-0.0877334	-0.117161	-0.0846703	0.0551957	-0.0484122	0.126973	0.0370307	-0.0203404	0.0200577	-0.109359	0.328836	0.443607	0.266637	0.211635	2.78636e-05	0.872281	0.832604	0.000114961	-0.0578786	0.0468495	0.324528			yes
Q8BGW1	FTO	Q8BGW1_FTO	-0.0877334	0.0071955	0.0100637	-0.131313	0.0813396	0.00288251	-0.00578235	-0.00578235	0.0524159	-0.0350469	-0.00723157	-0.123434	-0.0159576	-0.07552	0.123004	0.0813396	0.164786	0.23634	0.000337045	0.147868	0.999985	0.000488129	0.0431515	0.00522205	0.184164			yes	Yes
Q8K039		Q8K039_	-0.14401	-0.0174171	-0.172994	0.0313952	0.0114956	0.0799754	0.0243197	0.232661	-0.00144342	0.200379	0.0370307	-0.104697	0.189034	0.446786	0.438293	0.334568	0.176323	0.209141	0.0172376	0.318679	0.0718668	0.00683314	0.105033	0.269748	0.352568			yes
Q62086	PON2	Q62086_PON2	0.123004	0.0200577	0.119024	-0.00433459	0.0840643	0.0172093	0.120352	0.129613	0.0908534	-0.0454314	-0.0424568	-0.106249	-0.0573917	-0.0619024	0.153157	0.0607392	0.0229004	0.0114956	0.0015135	0.8158	0.00571925	0.999771	0.0213125	-0.126933	-0.027721		yes		Yes
A2ADW8	GM15128	A2ADW8_GM15128	1.14339	1.02503	1.24367	2.53082	2.09424	0.546956	1.40871	0.653519	1.81065	0.889084	0.0840643	0.222805	0.538041	0.495695	-0.0513992	0.0635029	0.500802	0.177599	0.00632014	0.913806	0.0277481	0.0091491	0.21518	-0.697835	-1.07298			yes
P52293	KPNA2	P52293_KPNA2	0.155749	0.146655	0.16221	0.151859	0.0676387	0.0114956	0.0840643	-0.114035	-0.0619024	0.171207	0.15056	0.10165	0.120352	0.00432161	-0.118727	-0.166503	-0.018878	0.0468403	0.00225517	0.015495	0.682191	0.00211204	-0.142308	-0.033452	-0.222606			yes
Q9D0B0	SRSF9	Q9D0B0_SRSF9	-0.0785637	-0.163268	-0.142417	-0.261881	-0.192645	0.0313952	0.0313952	0.339137	-0.106249	-0.0159576	0.0881416	0.298658	0.230203	0.215368	0.0482362	0.0468403	0.172488	0.0607392	0.0204824	0.14888	0.00767506	0.0565457	0.184238	0.36821	0.20733		yes
D3YVW2	GOLIM4	D3YVW2_GOLIM4	-0.0203404	-0.101598	0.0342157	-0.147202	-0.018878	0.0758749	0.0398403	0.340277	0.0200577	-0.0908029	0.0565835	-0.128156	-0.106249	0.235114	0.421156	0.328836	0.0989585	0.284514	0.0127188	0.258545	0.884427	0.00746176	0.100809	-0.0298337	0.367644			yes
Q8K248	HPDL	Q8K248_HPDL	0.0271541	-0.145605	0.077243	0.0758749	0.100305	0.130931	0.0949116	0.105678	0.22033	0.319618	0.306845	0.298658	0.104337	0.0813396	0.145351	0.129613	0.141433	0.116365	0.0181395	0.120154	0.00563605	0.133697	0.0541635	0.247143	0.0840085		yes		Yes
Q8BMA3	CNKSR3	Q8BMA3_CNKSR3	0.0426443	0.108357	0.0172093	0.157044	0.16092	0.0621217	0.244887	-0.0800879	0.0786098	0.119024	0.0186342	-0.00578235	0.169925	0.24123	0.248535	0.305679	0.304511	0.454176	0.00851254	0.995415	0.952238	0.0087009	0.00310915	0.0435234	0.229594			yes	Yes
P35487	PDHA2	P35487_PDHA2	-0.110916	0.0607392	-0.172994	0.0426443	0.402722	0.0398403	0.164786	0.185232	0.164786	0.192825	0.0922074	0.290424	0.169925	0.175045	0.0579701	0.128293	0.194087	0.221568	0.0137476	0.00969976	0.0121424	0.0415137	0.198922	0.209181	0.195326	yes
Q8BYH7	TBC1D17	Q8BYH7_TBC1D17	0.0894981	-0.0785637	-0.0306192	-0.109359	0.0143553	0.0200577	0.133564	0.130931	0.0186342	0.0799754	-0.0588937	0.0635029	0.102994	-0.00144342	0.230203	0.27858	0.258217	0.0703893	0.0041258	0.194221	0.414696	0.00158987	0.0746491	0.118094	0.298801			yes
A0A1W2P7N3	LAMA2	A0A1W2P7N3_LAMA2	-0.0528949	-0.0558912	0.0200577	0.264236	0.123004	-0.0603973	-0.103147	-0.0603973	0.0758749	0.255803	0.438293	0.308011	0.601221	0.390668	0.355016	0.313826	0.473008	0.608809	0.000133285	0.890066	0.00276383	0.00190352	-0.0439787	0.407087	0.430431		yes	yes
P56393	COX7B	P56393_COX7B	0.00575927	0.0071955	-0.0335695	0.207893	0.166073	-0.289827	-0.0619024	-0.187707	-0.0679388	0.0551957	-0.166503	-0.579922	-0.22095	-0.132894	-0.314733	-0.378944	-0.490051	-0.650635	0.00724456	0.532467	0.112745	0.0031204	-0.0744162	-0.17298	-0.440975			yes	Yes
O08532-5	CACNA2D1	O08532-5_CACNA2D1	0.187768	0.240009	0.436162	0.175045	0.0482362	-0.0144996	-0.0232698	0.077243	0.104337	-0.222633	-0.129734	-0.202572	-0.139236	0.120352	0.172488	0.104337	-0.145605	-0.204233	0.00560632	0.0567022	0.00196287	0.02264	-0.165652	-0.353124	-0.234522		yes
Q9CRA2	PDLIM5	Q9CRA2_PDLIM5	0.166073	0.403813	0.219091	0.285698	-0.347399	-1.05889	-0.650635	-0.821126	-0.270556	-1.04692	-0.935117	-1.24127	-1.191	-1.01159	-1.43831	-1.75147	-1.49005	-1.46993	4.05183e-08	4.93587e-05	2.62936e-08	1.43299e-11	-0.903029	-1.29931	-1.73238	yes	yes	yes
P07361	ORM2	P07361_ORM2	0.119024	-0.222633	-0.121863	0.117695	-0.0558912	1.32884	1.50589	-0.392137	0.0129262	2.64178	2.10769	2.49493	2.55851	0.0648829	-0.60165	-0.384584	-0.226004	-0.444184	0.00146274	0.624317	0.00370777	0.8027	0.0150102	2.49701	-0.4123		yes
Q9DBU3	RIOK3	Q9DBU3_RIOK3	-0.0380063	-0.100051	-0.21424	-0.137648	0.0071955	0.0229004	-0.148801	-0.0439433	-0.106249	-0.0232698	-0.16004	-0.0969617	-0.120294	-0.1976	0.0579701	0.0635029	0.0731347	0.252173	0.00177561	0.416565	0.999862	0.00190019	0.0749062	-0.0014445	0.187168			yes	Yes	Yes
Q8K224	NAT10	Q8K224_NAT10	-0.12658	0.195348	-0.15682	0.0496308	0.0229004	0.0398403	0.155749	0.00288251	-0.131313	0.185232	-0.147202	0.316146	0.265437	0.146655	1.53456	1.04194	0.402722	0.252173	0.00562142	0.998074	0.761934	0.00539927	0.061375	0.223707	0.760806			yes	Yes
G3X9D6	APON	G3X9D6_APON	-0.0218044	0.0243197	0.0143553	-0.00288828	-0.426625	-0.14401	-0.0603973	-0.558517	-0.0969617	0.0799754	-0.109359	-0.226004	-0.186065	-0.471929	-0.508403	-0.494109	-0.541618	-0.584241	0.00284166	0.0728996	0.237877	0.000910784	-0.149744	-0.191799	-0.530744			yes
Q61469-2	PLPP1	Q61469-2_PLPP1	0.704872	0.191563	0.479231	0.699552	0.706641	0.809826	0.896853	-0.0709665	0.427606	0.898402	0.709291	0.471968	0.46048	0.669934	-0.121863	-0.195946	0.0827026	-0.481968	0.00268587	0.994813	0.842198	0.00848824	0.11725	0.0805425	-0.748296			yes	Yes		Yes
P14106	C1QB	P14106_C1QB	0.237564	-0.153607	0.0676387	-0.0174171	-0.284546	-0.171368	0.0398403	-0.0573917	-0.244685	0.124328	0.0384362	-0.0159576	-0.258425	-0.26708	-0.289827	-0.388355	-0.494109	-0.488026	0.00482851	0.21679	0.561831	0.00208481	-0.196479	-0.0410684	-0.463301			yes
Q6PAR0	KLHDC10	Q6PAR0_KLHDC10	0.196607	-0.0892673	0.212881	0.259423	-0.321928	-0.0306192	-0.166503	-0.109359	-0.153607	-0.142417	-0.0785637	-0.171368	-0.0558912	-0.0232698	-0.448115	-0.258425	-0.336428	-0.336428	0.000122338	0.00217769	0.0110994	5.26237e-05	-0.358351	-0.283308	-0.541172	yes		yes
Q6P3Z3	THAP4	Q6P3Z3_THAP4	-0.0439433	0.045443	0.0172093	0.0894981	0.0426443	-0.21927	-0.0877334	-0.0785637	-0.229382	-0.0174171	-0.217591	-0.226004	-0.192645	-0.147202	-0.155213	-0.236164	-0.194295	-0.325539	0.00649867	0.0709691	0.0160656	0.00265481	-0.11906	-0.223971	-0.246556			yes
Q8C8K1	EPHB4	Q8C8K1_EPHB4	0.285698	-0.00144342	0.0867838	0.120352	0.0867838	-0.0291463	0.266637	0.0662614	-0.00723157	0.524064	0.290424	0.252173	0.483364	0.60027	0.389567	0.422233	0.276199	0.388465	0.000869432	0.887075	0.00495495	0.0293979	-0.0373065	0.379796	0.285448		yes			Yes
Q64337-2	SQSTM1	Q64337-2_SQSTM1	-0.0573917	-0.131313	-0.121863	0.168642	-0.0892673	-0.224317	0.0370307	-0.0203404	0.0129262	0.0271541	0.00432161	0.102994	0.303342	-0.00433459	0.408168	0.340277	0.644318	0.210389	0.00101331	0.990757	0.430094	0.00151436	0.0692869	0.116781	0.46385			yes
Q3TIR3	RIC8A	Q3TIR3_RIC8A	-0.260152	-0.386468	-0.0649175	-0.176251	-0.171368	0.10165	-0.121863	-0.163268	0.0100637	0.0214797	0.0214797	0.46048	0.526069	-0.0320936	0.309176	-0.0439433	0.333424	0.558757	0.00983149	0.555308	0.0215114	0.00890363	0.0963385	0.239681	0.539502			yes
G5E8L8	MAP3K2	G5E8L8_MAP3K2	-0.0262051	-0.362158	-0.305788	-0.341903	-0.237864	-0.0513992	-0.0306192	-0.212568	-0.0350469	0.0129262	-0.405451	0.121679	0.0662614	-0.226004	-0.0694519	0.164786	0.320773	0.279768	0.0207103	0.454675	0.327028	0.00769497	0.272446	0.336772	0.546123			yes		Yes
A0A0R4J097	TGFBR3	A0A0R4J097_TGFBR3	0.253384	0.015783	0.178874	-0.137648	0.128293	0.182692	0.259423	0.0440443	0.166073	0.420078	0.288063	0.365133	0.326537	0.316146	0.326537	0.182692	0.167358	0.273814	0.00900406	0.526988	0.00413664	0.101149	0.0687445	0.229209	0.130924		yes
Q60935	ART1	Q60935_ART1	-0.232769	0.275007	0.230203	-0.2567	-0.15682	0.0299829	-0.145605	0.0271541	0.276199	0.141433	0.545968	0.210389	0.335712	1.00216	0.665393	0.580145	0.675364	0.787432	0.00273231	0.999998	0.0474804	0.00509388	0.0284371	0.336995	0.671662			yes	Yes
Q8BTU1	CFAP20	Q8BTU1_CFAP20	0.0565835	0.178874	0.0676387	-0.215915	-0.248108	-0.011588	-0.0740006	0.141433	0	-0.227692	-0.086201	0.0827026	-0.00578235	0.186501	0.435095	0.258217	0.359521	0.464668	0.00271093	0.861467	0.973959	0.00903951	-0.0736991	-0.0678935	0.335197			yes
Q68FM7	ARHGEF11	Q68FM7_ARHGEF11	-0.643856	-0.475936	-0.541618	-0.415038	-0.818579	-0.619271	-0.288065	-0.475936	-0.625934	-0.498179	-0.500218	-0.446148	-0.597278	-0.500218	-0.274041	-0.343732	0.0648829	0.260628	0.00406298	0.958567	0.999421	0.0083053	-0.110494	0.008559	0.404198			yes
A2ASS6	TTN	A2ASS6_TTN	0.0257376	-0.00433459	-0.0262051	-0.00144342	0.045443	-0.0306192	-0.0218044	-0.120294	-0.0484122	0	0.0086303	-0.046921	-0.0785637	0.159629	-0.139236	-0.107803	-0.046921	-0.046921	0.172739	0.760723	0.98955	0.185004	-0.0277302	0.00288901	-0.074473
Q02566	MYH6	Q02566_MYH6	-0.018878	0	-0.0218044	0.0172093	0.0468403	-0.018878	-0.00144342	0.0271541	-0.00578235	0.0299829	0.00144197	0.120352	0.0593553	0.0524159	-0.0619024	0.0100637	-0.0203404	0	0.0257463	0.81228	0.0429347	0.90643	0.00799558	0.0618549	-0.0007312
P62737	ACTA2	P62737_ACTA2	0.0524159	0.0086303	-0.0424568	0.0867838	0.0922074	0.00288251	0.0758749	-0.0101344	0.045443	0.16221	0.0593553	0.14274	0.134878	-0.0247367	-0.0513992	0.0328061	0.0799754	0.14274	0.451466	0.97268	0.313169	0.908539	0.0149199	0.104355	0.0258677
Q03265	ATP5A1	Q03265_ATP5A1	-0.0291463	0.0243197	-0.0499049	0.0143553	0.0786098	-0.101598	-0.093879	0.0129262	0.0143553	-0.0816138	-0.0679388	-0.0484122	-0.0262051	-0.0558912	-0.0394883	-0.0439433	-0.046921	0.0935602	0.54432	0.992988	0.483326	0.999991	0.0203217	-0.0484957	-0.0343203
P51667	MYL2	P51667_MYL2	-0.0291463	0.0440443	-0.103147	0.0690147	0.14274	-0.0409718	-0.0247367	0.00288251	-0.013043	0.120352	0.0579701	0.0745054	0.133564	0.0143553	-0.0203404	0.0813396	0.041243	0.116365	0.236339	0.95106	0.167726	0.446581	-0.020492	0.0670564	0.0538423
P56480	ATP5B	P56480_ATP5B	-0.0232698	0.0342157	-0.0394883	0.045443	0.126973	-0.0694519	-0.0528949	0.0100637	0.0285692	-0.0291463	-0.0513992	-0.0454314	0.0086303	-0.0588937	-0.0232698	-0.00288828	0.00288251	0.109695	0.45821	0.99867	0.588073	0.941968	0.00459075	-0.0509044	-0.00547584
P07724	ALB	P07724_ALB	0.0313952	-0.0558912	0.0328061	0.00575927	-0.179515	-0.200913	0.185232	0.0440443	-0.0558912	-0.0954196	0.00432161	0.0908534	-0.0513992	-0.117161	-0.115597	0.0786098	-0.011588	-0.0439433	0.928368	0.855916	0.908957	0.967673	-0.0744684	-0.0699764	-0.0463429
Q9JI91	ACTN2	Q9JI91_ACTN2	0.0496308	0.0229004	-0.0203404	0.0468403	0.0935602	0.00432161	0.0565835	-0.0218044	0.015783	0.0496308	0.0243197	0.0662614	0.0356239	0.00432161	-0.018878	0.0129262	0.0356239	0.0799754	0.970415	0.993793	0.936514	0.999152	-0.0190874	0.00075355	-0.0105953
A8DUK4	HBB-BS	A8DUK4_HBB-BS	0.00432161	-0.0394883	0.0426443	0.0827026	-0.253257	0.49057	0.455229	0.0908534	0.485427	-0.291592	-0.334607	0.702214	0.237564	-0.174621	-0.224317	0.24245	-0.093879	-0.295128	0.429243	0.564886	0.999988	0.912554	0.431746	-0.198104	-0.182581
P04247	MB	P04247_MB	-0.0724828	0.00432161	-0.121863	-0.00288828	0.0186342	-0.158429	-0.164884	-0.0679388	-0.0588937	0.045443	-0.0634092	-0.0439433	0.0299829	-0.0694519	-0.204233	-0.0588937	-0.112475	0.0086303	0.398016	0.757089	0.879855	0.713779	-0.0302533	-0.00625776	-0.0479988
A0A0A0MQF6	GAPDH	A0A0A0MQF6_GAPDH	0.015783	0.0100637	0.0114956	0.0271541	0.0538064	0.0172093	-0.0394883	-0.0394883	0.0200577	0.0565835	-0.00868224	0.0313952	-0.0484122	-0.125006	-0.0831412	-0.101598	-0.027675	-0.0394883	0.132559	0.944846	0.557627	0.0782151	0.00357	-0.0223215	-0.074954
Q14BI5	MYOM2	Q14BI5_MYOM2	-0.00288828	0.0229004	-0.0528949	-0.00144342	0.0731347	-0.0101344	0.00432161	-0.027675	0.00288251	0.0214797	-0.00578235	0.0370307	0.0496308	-0.0543923	-0.0380063	-0.0144996	0.0143553	0.0731347	0.896043	0.856464	0.834363	0.86929	0.00504836	0.0236456	0.0020937
E9Q616	AHNAK	E9Q616_AHNAK	0.0114956	-0.0144996	0.0299829	-0.0649175	-0.100051	-0.0291463	-0.0619024	-0.0513992	-0.117161	-0.0558912	0.0621217	-0.177882	-0.0877334	-0.136062	0.14274	0.0200577	0.0676387	0.0229004	0.0147011	0.332169	0.256466	0.261575	-0.0604004	-0.0862314	0.0467715
Q99JY0	HADHB	Q99JY0_HADHB	0.041243	0.0989585	-0.0203404	0.120352	0.134878	-0.137648	-0.0694519	-0.0558912	0.0214797	-0.0892673	-0.110916	-0.164884	-0.086201	-0.0985055	0.00288251	-0.093879	-0.0740006	0.0703893	0.0307737	0.270325	0.0104348	0.286859	-0.125992	-0.168606	-0.10566
O55143	ATP2A2	O55143_ATP2A2	-0.0634092	-0.0985055	0.177599	0.0271541	0.0703893	0.0676387	0.00288251	-0.0634092	0.0813396	0.102994	0.109695	0.0482362	-0.0679388	0.451013	0.0840643	0.0214797	0.0356239	-0.0394883	0.475334	0.988005	0.379351	0.996398	0.0857662	0.121122	0.0466794
Q3UIK0	MYBPC3	Q3UIK0_MYBPC3	-0.00144342	0	-0.0908029	0.0143553	0.0370307	-0.0588937	-0.0232698	-0.0694519	-0.0528949	0.0426443	0.00288251	0.0100637	0.0299829	-0.07552	-0.0679388	-0.0558912	-0.0262051	0.00144197	0.508326	0.925128	0.791211	0.882586	-0.0521732	0.0107854	-0.0403264
F8WID5	TPM1	F8WID5_TPM1	-0.0785637	0.00575927	-0.115597	-0.027675	-0.0380063	-0.0816138	-0.104697	0.128293	-0.0954196	0.0468403	0.0370307	0.107018	0.134878	0.0384362	-0.0528949	0.140124	-0.0247367	0.0676387	0.0679752	0.977121	0.0575942	0.268927	-0.0284944	0.0999597	0.0745704
Q6P8J7	CKMT2	Q6P8J7_CKMT2	0.0299829	0.0356239	-0.0409718	0.0935602	0.185232	-0.103147	-0.00723157	-0.00288828	0.0976108	-0.0394883	-0.0573917	0.00288251	-0.011588	-0.0350469	0.00575927	-0.027675	0.0271541	0.077243	0.490948	0.999321	0.467227	0.995173	-0.0356917	-0.0678503	-0.0163467
E9Q557	DSP	E9Q557_DSP	0.0229004	0.0299829	-0.0439433	-0.00868224	-0.0101344	-0.103147	-0.0816138	-0.0954196	-0.0499049	-0.0365259	-0.013043	-0.118727	-0.0724828	-0.07552	0.0299829	-0.0320936	-0.0724828	-0.0335695	0.0665395	0.0510004	0.0715782	0.637303	-0.0887229	-0.0795919	-0.0399406
Q8BMS1	HADHA	Q8BMS1_HADHA	-0.00288828	0.051024	-0.0634092	0.0524159	0.0731347	-0.184425	-0.14401	-0.0218044	-0.0306192	-0.137648	-0.145605	-0.14401	-0.0664274	-0.0543923	-0.0409718	-0.0800879	-0.12658	0.0786098	0.190165	0.399459	0.0891824	0.662357	-0.0546871	-0.161716	-0.0845977
P07310	CKM	P07310_CKM	-0.00868224	0.0229004	-0.0543923	0.0468403	0.0690147	-0.0144996	-0.0247367	-0.0247367	-0.0144996	0.0579701	0.00288251	0.051024	0.0214797	-0.0588937	-0.0831412	-0.0573917	-0.0409718	0.0496308	0.51557	0.99886	0.949722	0.599611	-0.0216087	0.0143706	-0.0562908
P54071	IDH2	P54071_IDH2	0.0328061	0.00144197	-0.129734	0.0745054	0.0717627	-0.129734	-0.123434	-0.046921	-0.0816138	-0.100051	-0.0679388	-0.16004	-0.0573917	-0.0262051	-0.0247367	-0.0232698	0.0257376	0.219091	0.139869	0.628922	0.40851	0.688095	-0.0987378	-0.0850628	-0.0158901
Q62234	MYOM1	Q62234_MYOM1	0.0257376	-0.00144342	-0.0439433	0.0440443	0.0648829	-0.0454314	0.0143553	-0.0785637	-0.0232698	0.0538064	0.0172093	0.0229004	0.0071955	-0.101598	-0.0740006	-0.07552	-0.018878	-0.0159576	0.459028	0.876033	0.994907	0.335187	-0.0354169	0.00506221	-0.0585864
Q8BWT1	ACAA2	Q8BWT1_ACAA2	-0.0380063	0.0271541	-0.0365259	-0.0203404	-0.0588937	-0.161653	-0.145605	-0.0649175	-0.0424568	-0.107803	-0.129734	-0.118727	-0.101598	-0.155213	-0.0831412	-0.14401	-0.153607	-0.00433459	0.029141	0.065422	0.0120875	0.0757281	-0.0364843	-0.0902938	-0.0851424
P09542	MYL3	P09542_MYL3	-0.0528949	-0.011588	-0.142417	0.041243	0.0976108	-0.0649175	-0.0484122	0.0538064	0.00144197	0.0922074	0.0370307	0.133564	0.163499	0.0538064	-0.0203404	0.100305	0.0648829	0.180148	0.0385012	0.594695	0.0278609	0.0651642	0.0336834	0.124449	0.114835
Q99KI0	ACO2	Q99KI0_ACO2	0.00432161	0.00288251	-0.0262051	0.051024	0.0648829	-0.131313	-0.0664274	0.138814	0.015783	-0.0603973	-0.0649175	0.0384362	-0.00578235	0.0214797	-0.0262051	0.0538064	-0.0247367	0.136191	0.80085	0.99967	0.938373	0.913128	0.0121809	-0.00938441	0.0109328
A3KGU9	SPTAN1	A3KGU9_SPTAN1	0.0313952	0.00144197	-0.0144996	-0.018878	0.0200577	0.0621217	0.0271541	0.0129262	-0.0365259	0.0593553	0.112367	-0.0101344	0.051024	-0.0846703	0.119024	0.0786098	0.107018	0.0989585	0.035963	0.895997	0.741766	0.0209862	0.0265865	0.0575528	0.109517
P63038	HSPD1	P63038_HSPD1	-0.0203404	0.0200577	-0.046921	0.0229004	0.0129262	-0.013043	-0.0588937	-0.110916	-0.0306192	0	0.0257376	-0.0203404	-0.0543923	-0.132894	-0.0174171	-0.00578235	0.0100637	0.0398403	0.378792	0.55648	0.635867	0.957567	-0.0304779	-0.0201991	0.00228202
P17182	ENO1	P17182_ENO1	0.00288251	-0.0174171	-0.0306192	0.0200577	0.0257376	-0.0543923	-0.027675	-0.0513992	-0.0528949	0.0854247	-0.00144342	0.0313952	0.051024	-0.125006	-0.00578235	-0.0619024	0.0086303	0.0313952	0.669134	0.789768	0.949041	0.999996	-0.0441319	0.0386625	0.00869127
Q91Z83	MYH7	Q91Z83_MYH7	0.43189	0.132248	-0.58208	-0.166503	-0.0439433	0.558757	-0.0335695	-0.351074	-0.571322	-0.42082	0.642471	-0.994241	-0.494109	0.0635029	0.54201	0.77905	0.503858	1.09559	0.038295	0.998077	0.862834	0.0816332	-0.0268158	-0.403693	0.677658
P11531	DMD	P11531_DMD	-0.00578235	0.0496308	0.0100637	-0.0101344	0.0328061	-0.0306192	-0.0218044	0.0384362	0.0468403	-0.011588	0.0129262	-0.077041	-0.0101344	0.0200577	0.0908534	0.0648829	0.0071955	0.0214797	0.15428	0.999394	0.623651	0.388681	0.0306654	-0.0122751	0.0410406
P31001	DES	P31001_DES	-0.011588	-0.00144342	-0.0409718	-0.0203404	-0.0439433	-0.046921	-0.123434	-0.0543923	-0.104697	-0.0262051	0.00144197	-0.07552	-0.00723157	-0.0985055	-0.011588	-0.0694519	-0.0619024	-0.0424568	0.143582	0.0647048	0.62723	0.520838	-0.0384281	-0.0102409	-0.0362154
P48962	SLC25A4	P48962_SLC25A4	0.0243197	0.0676387	0.0398403	0.0621217	0.255803	0.144046	0.0827026	0.244887	0.24732	0.109695	0.155749	0.146655	0.171207	0.386259	0.14274	0.167358	0.192825	0.316146	0.042858	0.042768	0.0444069	0.0403827	0.193906	0.104768	0.129111
Q60597	OGDH	Q60597_OGDH	0.0200577	0.0071955	-0.0709665	0.0731347	0.0229004	-0.136062	-0.0785637	-0.100051	-0.0573917	-0.0203404	-0.0499049	-0.125006	-0.0558912	-0.0846703	-0.106249	-0.142417	-0.0694519	0.00575927	0.144446	0.133833	0.150716	0.111327	-0.0921903	-0.0695178	-0.101477
Q9JHU4	DYNC1H1	Q9JHU4_DYNC1H1	0.0100637	-0.00578235	0.0342157	0.0100637	-0.018878	0.0086303	-0.0619024	-0.0306192	-0.0174171	-0.0291463	-0.0144996	-0.115597	-0.07552	0.077243	0.0200577	-0.0174171	-0.0409718	-0.0573917	0.507749	0.494749	0.355176	0.53541	-0.0289417	-0.03921	-0.0392582
P11404	FABP3	P11404_FABP3	-0.00288828	0.0200577	-0.103147	0.0271541	-0.0247367	-0.112475	-0.158429	-0.186065	-0.0969617	0.0229004	-0.0365259	-0.0709665	-0.00868224	-0.166503	-0.086201	-0.0380063	-0.100051	0.0243197	0.160221	0.0806484	0.712966	0.769492	-0.12106	-0.0451106	-0.0706884
Q8VHX6	FLNC	Q8VHX6_FLNC	0.0881416	-0.0499049	-0.0101344	0.00144197	0.0426443	0.140124	0.102994	-0.0649175	-0.0634092	0.0949116	0.155749	0.0935602	0.0328061	-0.0409718	-0.00433459	-0.00288828	0.123004	0.041243	0.694641	0.927986	0.503915	0.872779	0.0469905	0.0979064	0.0235236
E9PWQ3	COL6A3	E9PWQ3_COL6A3	0.124328	-0.0454314	0.051024	-0.0892673	-0.0528949	0.176323	0.107018	0.0313952	-0.0785637	0.0398403	0.235114	-0.209228	0	-0.0954196	0.180148	0.0496308	0.231432	0.0186342	0.483179	0.976284	0.994356	0.46577	0.0285989	-0.0027963	0.112093
P08249	MDH2	P08249_MDH2	-0.0174171	-0.0247367	-0.07552	0.0285692	0.0551957	-0.184425	-0.121863	0.0440443	-0.0394883	-0.0649175	-0.112475	0.0593553	0.0579701	-0.0394883	-0.0985055	-0.0573917	-0.00288828	0.219091	0.806722	0.951158	0.999962	0.901171	-0.0184114	-0.0184114	-0.00906309
P97807	FH	P97807_FH	-0.046921	0.0243197	-0.0174171	0.0313952	0.0551957	-0.0954196	-0.0985055	0.0468403	0.0071955	-0.0846703	-0.104697	-0.115597	-0.0649175	-0.0409718	-0.0454314	-0.0203404	-0.0664274	0.0285692	0.122771	0.943353	0.0785755	0.837416	0.0037442	-0.0881216	-0.0363372
Q61941	NNT	Q61941_NNT	0.00432161	0.0799754	0.0214797	-0.0409718	0.123004	0.141433	0.0635029	0.180148	0.204141	0.0299829	0.185232	-0.0877334	0.138814	0.520045	0.382944	0.253384	0.210389	0.371838	0.0600521	0.380645	0.30006	0.0220913	0.128532	0.125913	0.29971
Q9D051	PDHB	Q9D051_PDHB	0.015783	0.0621217	-0.00578235	0.0717627	0.221568	0	0.0143553	0.0962619	0.15056	0.0593553	0.0356239	0.0214797	0.0257376	0.0271541	0.0143553	0.0745054	0.115033	0.149259	0.273596	0.326692	0.999884	0.474043	0.0573096	-0.0117982	0.0558169
A6ZI44	ALDOA	A6ZI44_ALDOA	0.0086303	0.158337	-0.215915	0.0299829	0.0100637	-0.222633	-0.0424568	-0.217591	-0.22095	0.0579701	-0.194295	-0.0203404	-0.00723157	-0.202572	-0.0499049	-0.209228	-0.046921	0.00575927	0.462225	0.268138	0.730524	0.745043	-0.236898	-0.039647	-0.0677195
Q60675	LAMA2	Q60675_LAMA2	0.0299829	0.0703893	-0.0262051	-0.027675	0.0989585	0.0071955	0.0229004	0.051024	0.0299829	0.0229004	0.077243	-0.0816138	0.0551957	-0.00723157	0.168642	0.10165	0.0551957	0.0854247	0.0617855	0.681305	0.999896	0.0507598	0.028094	0.0210115	0.0916485
E9Q800	IMMT	E9Q800_IMMT	-0.0232698	0.0129262	-0.0380063	0.00575927	-0.0218044	-0.123434	-0.086201	-0.0484122	-0.0144996	-0.0724828	-0.077041	-0.12658	-0.0679388	-0.0694519	-0.0484122	-0.093879	-0.0892673	-0.0439433	0.0304396	0.103409	0.0129022	0.0572309	-0.0396569	-0.0637275	-0.0600845
Q8K2B3	SDHA	Q8K2B3_SDHA	-0.0203404	-0.0350469	-0.0724828	0.0440443	0.015783	-0.131313	-0.0800879	-0.0159576	-0.00868224	-0.0558912	-0.0846703	-0.0816138	-0.0394883	-0.0724828	-0.0740006	-0.0573917	-0.046921	0.0257376	0.52095	0.784048	0.330662	0.904981	0.0117361	-0.0447891	-0.0244627
P19123	TNNC1	P19123_TNNC1	0.0398403	-0.0291463	-0.103147	0.104337	0.107018	-0.0394883	0.0922074	-0.0954196	0.0496308	0.225275	0.0786098	0.259423	0.267835	-0.0513992	-0.0320936	0.0271541	0.172488	0.324235	0.210005	0.989161	0.187344	0.387785	0.0442838	0.219928	0.0944741
Q9D0K2	OXCT1	Q9D0K2_OXCT1	-0.0232698	0.0186342	-0.046921	0.051024	0.0496308	-0.0969617	-0.0969617	-0.118727	-0.0159576	-0.0709665	-0.0649175	-0.104697	-0.0816138	-0.103147	-0.0679388	-0.134477	-0.0484122	-0.0101344	0.127769	0.265143	0.0593727	0.198883	-0.0946439	-0.079296	-0.0558577
Q99LC5	ETFA	Q99LC5_ETFA	-0.00144342	0.015783	-0.0454314	0.0426443	0.045443	-0.0985055	-0.0816138	0.151859	0.0143553	-0.0144996	-0.0380063	0.00144197	0	0.0384362	-0.0144996	0.077243	-0.0306192	0.111031	0.842488	0.99965	0.998625	0.822968	0.00718551	-0.00716979	0.0242019
Q9DCX2	ATP5H	Q9DCX2_ATP5H	-0.0588937	-0.00868224	-0.0424568	0.0468403	0.0440443	-0.0923402	-0.0954196	-0.0335695	-0.027675	-0.163268	-0.086201	-0.0969617	-0.0908029	0.0468403	-0.0484122	-0.0513992	-0.112475	-0.0101344	0.475016	0.853588	0.297202	0.655618	-0.00799998	-0.0652334	-0.0243362
Q64727	VCL	Q64727_VCL	0	0.0496308	-0.00433459	-0.0350469	-0.0724828	0.0827026	-0.0320936	0.108357	0.0214797	-0.027675	0.0356239	-0.0174171	0.0579701	-0.0908029	0.102994	0.0703893	0.0328061	-0.00144342	0.472007	0.92305	0.982767	0.502649	0.023647	-0.0152498	0.053765
P38647	HSPA9	P38647_HSPA9	-0.027675	0.0086303	-0.0573917	0.0398403	0.0313952	-0.046921	-0.0709665	-0.0439433	-0.0409718	0.0271541	0.0356239	0.00432161	0.0313952	-0.0603973	-0.0320936	-0.0218044	0.0071955	0.104337	0.399179	0.746124	0.900042	0.802653	-0.0344209	0.0366764	0.0022179
E9Q035	GM20425	E9Q035_GM20425	0.0758749	-0.0543923	0.107018	0.0299829	-0.210897	-0.0543923	0.359521	-0.128156	-0.0740006	0.27858	0.125651	0.366252	0.0949116	-0.202572	-0.227692	-0.093879	-0.242977	-0.286304	0.0630657	0.909042	0.759001	0.137625	-0.12693	0.0727221	-0.288263
Q921G7	ETFDH	Q921G7_ETFDH	-0.00144342	0.00288251	-0.0724828	0.0551957	0.0538064	-0.136062	-0.0679388	0.0229004	-0.0203404	-0.0454314	-0.046921	-0.0454314	-0.0424568	-0.0306192	-0.0724828	-0.0785637	-0.0877334	0.0172093	0.558498	0.801345	0.567912	0.388012	-0.0210599	-0.0461509	-0.0762428
E9Q401	RYR2	E9Q401_RYR2	-0.0831412	-0.194295	0.254594	0.109695	0.16092	0.0813396	0.0648829	-0.12658	0.015783	0.0962619	0.107018	-0.0159576	-0.231075	0.367371	-0.0588937	-0.0649175	-0.0740006	-0.179515	0.50798	0.996641	0.956352	0.614794	0.051606	0.082985	-0.082736
P05202	GOT2	P05202_GOT2	0.0143553	-0.018878	-0.0694519	0.0731347	0.108357	-0.161653	-0.0499049	0.0607392	0.0086303	-0.0203404	-0.110916	-0.00723157	0.0114956	0.00432161	-0.0724828	-0.0528949	0.0143553	0.157044	0.929082	0.998716	0.944327	0.993912	0.0108916	-0.00497022	-0.0170085
Q8QZT1	ACAT1	Q8QZT1_ACAT1	-0.0573917	-0.0203404	-0.118727	0.0524159	-0.00578235	-0.263612	-0.212568	-0.0543923	-0.0785637	-0.186065	-0.204233	-0.253257	-0.172994	-0.155213	-0.236164	-0.251539	-0.244685	-0.0923402	0.0268554	0.26778	0.0240453	0.0216663	-0.0396977	-0.147199	-0.201558
Q91VD9	NDUFS1	Q91VD9_NDUFS1	-0.0424568	0.0086303	-0.0365259	0.0129262	0.0468403	-0.101598	-0.100051	0.0172093	0.0186342	-0.0232698	-0.0619024	-0.0573917	-0.0365259	-0.0409718	-0.0409718	-0.0262051	-0.0513992	-0.192645	0.3869	0.987136	0.752295	0.270067	0.0311571	-0.027024	-0.0322377
Q9CQ62	DECR1	Q9CQ62_DECR1	0.0313952	0.0799754	0.00288251	0.108357	0.16092	-0.0846703	-0.0335695	0.0440443	0.0440443	-0.027675	-0.101598	-0.112475	-0.0513992	-0.0409718	0.0426443	-0.027675	-0.0291463	0.0758749	0.053349	0.819446	0.0290328	0.690318	-0.011641	-0.107084	-0.0482006
A0A0R4J083	ACADL	A0A0R4J083_ACADL	0.0172093	0.0129262	-0.0649175	0.0813396	0.128293	-0.093879	-0.0174171	0.0356239	0.0086303	0.0214797	-0.0335695	0.015783	0.051024	-0.0306192	0.0100637	0.0313952	0.0299829	0.211635	0.512251	0.999998	0.997611	0.5041	-0.00643745	0.00071525	0.0156213
O08749	DLD	O08749_DLD	-0.00868224	-0.011588	-0.0649175	0.0271541	0.0299829	-0.0877334	-0.0831412	-0.0409718	-0.00433459	-0.018878	-0.00144342	-0.0365259	-0.011588	-0.0800879	-0.0306192	-0.0174171	0.00575927	0.0813396	0.416981	0.765921	0.908928	0.759602	-0.0308367	-0.00874288	0.00430621
P45952	ACADM	P45952_ACADM	-0.0203404	0.0356239	-0.0619024	0.0398403	0.0398403	-0.129734	-0.0892673	0.0989585	-0.00144342	-0.0619024	-0.0892673	-0.0846703	-0.0619024	0	-0.0513992	-0.0232698	-0.114035	0.015783	0.531936	0.970518	0.403565	0.674276	-0.00908517	-0.0695441	-0.0449762
Q91WD5	NDUFS2	Q91WD5_NDUFS2	-0.00723157	0.0257376	0.0086303	0.0676387	0.100305	-0.0439433	-0.0232698	-0.0144996	0.0538064	-0.018878	-0.0573917	-0.0409718	-0.0484122	-0.00144342	0	-0.0203404	-0.0409718	-0.209228	0.124449	0.989978	0.351404	0.103468	-0.0316835	-0.0581558	-0.0478401
E9QPE7	MYH11	E9QPE7_MYH11	-0.128156	0.273814	0.280956	-0.467932	-0.41889	0.52707	0.466758	0.493647	0.119024	0.196607	0.532068	0.290424	0.332278	0.159629	0.722466	0.319618	0.392867	-0.215915	0.505402	0.560914	0.389945	0.423214	0.393929	0.217595	0.283413
Q9CZ13	UQCRC1	Q9CZ13_UQCRC1	-0.0101344	0.015783	-0.0218044	0.0717627	0.0922074	-0.107803	-0.0543923	0.0100637	0.0100637	-0.0499049	-0.0588937	-0.07552	-0.0454314	-0.0394883	-0.077041	-0.0528949	-0.0740006	0.00432161	0.16785	0.799718	0.132405	0.192236	0.0072394	-0.0527292	-0.066272
P20152	VIM	P20152_VIM	0.181421	-0.0846703	0.238787	-0.411195	-0.295128	0.183963	0.230203	0.304511	-0.093879	0.100305	0.210389	0.0086303	0.0867838	-0.0247367	0.360645	0.130931	0.380729	-0.0740006	0.591061	0.888898	0.853476	0.388719	0.135588	0.0384084	0.197413
B7ZCI2	NEBL	B7ZCI2_NEBL	0.0243197	0.0229004	-0.046921	0.0214797	0.0285692	-0.0394883	-0.0144996	-0.0740006	-0.0218044	0.041243	0.0342157	-0.00288828	0.0071955	-0.110916	-0.0664274	-0.0634092	-0.0350469	-0.00433459	0.446506	0.619884	0.956503	0.313477	-0.0439945	-0.0149946	-0.0714181
Q9CZU6	CS	Q9CZU6_CS	0.0257376	0.015783	-0.0634092	0.0922074	0.151859	-0.117161	-0.0380063	0.0370307	0.128293	0.0100637	-0.0588937	0.0922074	0.0676387	0.0440443	0.0524159	0.0257376	0.0717627	0.219091	0.603651	0.98642	0.989797	0.466499	0.0162704	0.023284	0.041329
P14152	MDH1	P14152_MDH1	0.00432161	0.0285692	-0.0439433	0.0854247	0.0976108	-0.0350469	-0.00433459	-0.027675	0.0172093	0.0243197	-0.0365259	0.0827026	0.0565835	-0.0954196	-0.046921	-0.0499049	-0.0335695	0.0854247	0.918513	0.992061	0.980955	0.829432	-0.02078	0.00787429	-0.0566907
P11499	HSP90AB1	P11499_HSP90AB1	0.0299829	-0.0409718	-0.046921	0.0114956	-0.0247367	0.0496308	-0.0350469	-0.0877334	-0.103147	0.121679	0.0172093	0.0482362	-0.0262051	-0.152003	-0.011588	-0.0573917	-0.0335695	-0.0816138	0.66665	0.854843	0.980542	0.803365	-0.0203088	0.0319474	-0.0307425
P70670	NACA	P70670_NACA	-0.011588	0.0129262	-0.112475	0.124328	0.0496308	-0.15682	-0.244685	-0.194295	-0.171368	-0.027675	-0.117161	-0.254978	-0.199255	-0.0528949	-0.205896	-0.22095	-0.246395	-0.174621	0.0340232	0.0788494	0.114987	0.0137575	-0.172037	-0.11783	-0.214092
Q8CC88	VWA8	Q8CC88_VWA8	0.0100637	0	-0.0484122	0.0648829	0.0690147	-0.161653	-0.07552	-0.0409718	-0.013043	-0.0320936	-0.14401	-0.0740006	-0.118727	-0.155213	-0.0800879	-0.104697	-0.0350469	0.00432161	0.103331	0.473408	0.0419041	0.386102	-0.0460037	-0.123759	-0.0625993
Q91YT0	NDUFV1	Q91YT0_NDUFV1	-0.0174171	-0.00868224	-0.0528949	0.0717627	0.102994	-0.14401	-0.0365259	-0.0320936	0.0143553	0.0200577	-0.0709665	-0.0454314	0.0356239	-0.0484122	-0.0634092	-0.0649175	-0.00433459	-0.166503	0.46616	0.960372	0.940879	0.314001	-0.0190439	-0.0323817	-0.0511137
A2AKU9	ATP5C1	A2AKU9_ATP5C1	-0.011588	0	-0.0513992	0.0758749	0.112367	-0.117161	-0.103147	0.0426443	-0.0262051	-0.0543923	-0.0634092	-0.0877334	-0.0679388	0.0200577	-0.128156	-0.0634092	-0.136062	-0.0291463	0.250885	0.925921	0.489282	0.157468	-0.0204111	-0.0576152	-0.0899886
A0A0R4J0I1	SERPINA3K	A0A0R4J0I1_SERPINA3K	0.187768	0.0703893	-0.0101344	-0.152003	0.105678	0.42975	0.703987	0.0143553	0.151859	0.273814	0.374066	0.662661	0.316146	0.0342157	0.295135	0.371838	0.0813396	-0.00578235	0.223091	0.231845	0.1305	0.602046	0.121732	0.286019	0.15811
Q8BMF4	DLAT	Q8BMF4_DLAT	0.0100637	0.0100637	-0.0664274	0.0565835	0.157044	-0.0543923	-0.00578235	0.108357	0.116365	0.0214797	0.00144197	0.041243	0	0.0745054	-0.046921	0.0186342	0.0908534	0.147958	0.566	0.413922	0.89907	0.604444	0.0982933	0.011416	0.0446801
P16125	LDHB	P16125_LDHB	-0.0335695	0.0370307	-0.0588937	0.00575927	-0.00433459	-0.093879	-0.114035	0.0356239	-0.0203404	-0.0232698	-0.0424568	-0.0484122	-0.0262051	-0.0679388	-0.086201	-0.046921	-0.129734	0.0482362	0.734569	0.786146	0.746527	0.565451	-0.00643528	-0.0285517	-0.0526559
Q9Z2I9	SUCLA2	Q9Z2I9_SUCLA2	-0.00288828	0.0100637	-0.00144342	0.051024	0.0593553	-0.148801	-0.0619024	0.0257376	0.0703893	-0.018878	-0.0923402	-0.0619024	-0.0634092	-0.0664274	-0.118727	-0.106249	-0.0634092	-0.0203404	0.114843	0.840714	0.161536	0.0940267	0.0214275	-0.0677193	-0.0891392
P20029	HSPA5	P20029_HSPA5	-0.00288828	-0.011588	-0.00723157	-0.0218044	-0.0394883	0.0799754	-0.0484122	-0.0159576	-0.046921	0.0690147	0.0468403	-0.0101344	0.0313952	-0.0954196	0.00288251	-0.0174171	-0.0306192	-0.0439433	0.777933	0.999059	0.863957	0.969751	-0.0300785	0.040805	-0.0146084
P21550	ENO3	P21550_ENO3	-0.336428	0	-0.0800879	-0.0513992	-0.0846703	-0.0954196	-0.236164	-0.104697	-0.07552	-0.0694519	-0.0513992	-0.0320936	-0.0679388	-0.166503	-0.202572	-0.1976	-0.248108	-0.22095	0.135927	0.999943	0.815758	0.246827	-0.029676	-0.00219525	-0.146017
A0A1L1SQ51	TLN2	A0A1L1SQ51_TLN2	0.0086303	0.0143553	0.0229004	-0.0174171	-0.0424568	0.0426443	0.00144197	0.0813396	0.0071955	-0.0101344	0.0342157	-0.011588	0.0949116	-0.0709665	0.0745054	0.0922074	0.0908534	0.0840643	0.0524459	0.959985	1	0.0497067	-0.0042973	-0.0216272	0.0759661
Q8VDN2	ATP1A1	Q8VDN2_ATP1A1	-0.0394883	-0.0528949	0.149259	-0.0424568	0.0229004	0.126973	0.0143553	-0.0528949	0.0976108	0.0496308	0.191563	-0.0320936	0.015783	0.504875	0.147958	0.0384362	0.0731347	-0.00868224	0.447679	0.947744	0.294113	0.861226	0.0638729	0.0906033	0.096758
Q6PB66	LRPPRC	Q6PB66_LRPPRC	0.0172093	-0.0144996	-0.07552	0.0840643	0.0071955	-0.205896	-0.110916	-0.0800879	-0.0380063	-0.0291463	-0.103147	-0.152003	-0.0892673	-0.125006	-0.0800879	-0.174621	-0.132894	0.00144197	0.143435	0.170135	0.0993404	0.136478	-0.0814428	-0.104502	-0.107846
E9QN70	LAMB1	E9QN70_LAMB1	-0.018878	0.0496308	-0.0694519	-0.0174171	0.0840643	0.0114956	-0.00578235	0.0370307	-0.011588	0.00432161	0.0894981	-0.0892673	0.0607392	-0.0380063	0.200379	0.104337	0.0299829	0.0962619	0.049824	0.670711	0.923795	0.0288172	0.0296432	0.0224692	0.118447
P58252	EEF2	P58252_EEF2	0.00288251	0.00575927	-0.00868224	-0.00868224	-0.0454314	-0.0232698	-0.110916	-0.093879	-0.0573917	0.0370307	-0.00288828	-0.0439433	-0.0923402	-0.103147	-0.0335695	-0.0800879	-0.086201	-0.107803	0.0749203	0.0760766	0.35675	0.047333	-0.0544918	-0.0410434	-0.0802446
Q9R0Y5-2	AK1	Q9R0Y5-2_AK1	-0.0320936	-0.00868224	-0.0634092	0.00432161	0.015783	-0.0816138	-0.077041	-0.0785637	-0.0424568	0.0114956	-0.0159576	-0.077041	-0.0513992	-0.109359	-0.0664274	-0.0365259	-0.0394883	0.0114956	0.698254	0.595236	0.702796	0.98401	-0.0566531	-0.0310113	-0.0176192
Q8BH95	ECHS1	Q8BH95_ECHS1	-0.0454314	0.0285692	-0.0664274	0.0071955	0.0285692	-0.077041	-0.109359	0.0243197	0.0100637	-0.0558912	-0.0203404	-0.147202	-0.0649175	-0.0247367	0.00288251	-0.0543923	-0.07552	0.0114956	0.581685	0.996683	0.471724	0.98573	0.0291816	-0.0367733	-0.00663695
Q8VDD5	MYH9	Q8VDD5_MYH9	0.0086303	-0.0291463	0.0949116	0.0299829	-0.0350469	0.822118	0.123004	0.734655	0.459432	0.0200577	-0.0232698	0.408168	0.809003	0.215368	0.0962619	0.657183	0.56267	0.38405	0.215562	0.151177	0.429027	0.173186	0.440125	0.196061	0.454053
O70250	PGAM2	O70250_PGAM2	0.0621217	-0.0409718	-0.0679388	0.0799754	0.0285692	-0.00144342	0.0342157	-0.00433459	-0.0619024	0.100305	0.0214797	0.153157	0.0370307	-0.0954196	-0.187707	-0.0350469	0.0328061	0.0731347	0.633416	0.996397	0.85932	0.853946	-0.0120184	0.0264558	-0.0116954
Q9EQ20	ALDH6A1	Q9EQ20_ALDH6A1	-0.00578235	0.0214797	-0.0543923	0.0384362	0.0398403	-0.109359	-0.0394883	-0.0394883	-0.00578235	-0.0424568	-0.0424568	-0.0350469	-0.0424568	-0.0694519	-0.0335695	-0.0785637	-0.00868224	0.10165	0.485785	0.683042	0.396532	0.998134	-0.047337	-0.0503055	-0.0289745
F8VQJ3	LAMC1	F8VQJ3_LAMC1	0.0299829	0.0690147	0	-0.0203404	0.102994	0.0342157	0.0398403	0.0908534	0.0143553	0.0229004	0.125651	-0.0484122	0.0621217	-0.00723157	0.207893	0.119024	0.0745054	0.0922074	0.0559871	0.598999	0.975831	0.0362458	0.0248489	0.00790895	0.0906243
Q61838	PZP	Q61838_PZP	0.0129262	0.0482362	0.0840643	-0.0380063	-0.320126	0.0799754	0.451013	-0.181149	-0.027675	0.0172093	-0.0785637	0.209141	-0.132894	-0.295128	-0.227692	-0.15682	-0.261881	-0.486004	0.151367	0.994012	0.863146	0.106629	-0.0582562	-0.109145	-0.275368
Q9CQA3	SDHB	Q9CQA3_SDHB	-0.00578235	0.0086303	-0.0831412	0.0313952	0.051024	-0.195946	-0.0892673	-0.0350469	-0.0380063	-0.0785637	-0.0923402	-0.0409718	-0.0218044	-0.0513992	-0.093879	-0.123434	-0.0679388	0.0908534	0.741165	0.606681	0.668024	0.805626	-0.0394303	-0.0528232	-0.0823329
Q01853	VCP	Q01853_VCP	-0.011588	-0.0306192	-0.00288828	0.00288251	-0.0291463	0.00575927	-0.0573917	-0.0144996	-0.00144342	-0.0203404	-0.0923402	-0.011588	-0.013043	-0.131313	-0.0439433	-0.018878	-0.027675	-0.0573917	0.265002	0.959682	0.179703	0.560839	-0.00726146	-0.0131023	-0.028571
Q8BTM8	FLNA	Q8BTM8_FLNA	-0.0800879	0.181421	0.258217	-0.388355	-0.37707	0.768925	0.516015	0.78073	0.381837	0.228973	0.38405	0.570463	0.789103	0.228973	0.520045	0.56267	0.691534	0.0827026	0.19007	0.191602	0.157721	0.158144	0.465348	0.333383	0.490691
P35486	PDHA1	P35486_PDHA1	-0.0394883	0.00432161	-0.07552	0.0257376	0.173767	-0.0816138	-0.027675	0.115033	0.0524159	0.0172093	-0.00868224	-0.027675	-0.0101344	0.051024	-0.0619024	0.0328061	0.0071955	0.0745054	0.517913	0.329932	0.888549	0.802872	0.0699992	0.0089011	0.0375841
Q9DCW4	ETFB	Q9DCW4_ETFB	-0.0724828	-0.0174171	-0.093879	-0.0291463	-0.0380063	-0.148801	-0.150401	0.0370307	-0.0394883	-0.109359	-0.0484122	-0.107803	-0.0831412	-0.0424568	-0.0380063	-0.011588	-0.12658	-0.0306192	0.866359	0.955446	0.82964	0.99995	0.0113263	-0.0323266	0.0165018
Q9CQQ7	ATP5F1	Q9CQQ7_ATP5F1	-0.00288828	0.00288251	0.0071955	0.0962619	0.0717627	-0.0634092	-0.0262051	-0.011588	0.0468403	-0.077041	-0.0232698	-0.103147	-0.107803	0.115033	-0.0144996	-0.0846703	-0.0724828	-0.0232698	0.31155	0.909791	0.321816	0.263978	-0.016627	-0.08208	-0.0529153
P62897	CYCS	P62897_CYCS	-0.0543923	-0.013043	-0.0350469	-0.0232698	0.0285692	-0.110916	-0.179515	-0.013043	-0.00144342	-0.145605	-0.110916	-0.0335695	-0.0877334	-0.0424568	-0.128156	-0.0499049	-0.140826	-0.00288828	0.578264	0.884761	0.453075	0.544187	0.0161154	-0.0585751	-0.0598721
Q61425	HADH	Q61425_HADH	0.0342157	0.0313952	-0.0262051	0.108357	0.0731347	-0.150401	-0.0846703	-0.027675	-0.0144996	-0.0454314	-0.0985055	-0.00288828	-0.00723157	-0.0892673	-0.164884	-0.16004	-0.128156	0.0786098	0.169406	0.340653	0.272695	0.0796138	-0.0604805	-0.0782368	-0.176903
Q9JKS4-3	LDB3	Q9JKS4-3_LDB3	0.0440443	0.0440443	-0.0306192	0.0328061	0.104337	0.0243197	0.0129262	0.045443	0.0071955	0.0398403	0.0662614	0.0313952	0.0271541	0.0426443	0.0186342	0.045443	0.0200577	0.0745054	0.793812	0.761768	0.679154	0.763819	-0.0141055	0.0014151	-0.00567485
P63017	HSPA8	P63017_HSPA8	0.0257376	-0.0203404	-0.0380063	0.0200577	-0.0159576	0.0607392	-0.0218044	0.0635029	-0.0306192	0.0976108	0.0384362	0.169925	0.0949116	-0.0816138	-0.0247367	0.0881416	0.0257376	0.0949116	0.393768	0.972593	0.299496	0.565121	-0.0158163	0.0950529	0.0570809
P09411	PGK1	P09411_PGK1	0.0071955	-0.013043	0.00575927	0.0440443	0.0384362	0.0172093	0.0186342	-0.027675	0.0186342	0.134878	0.0758749	0.134878	0.0703893	-0.0969617	-0.0846703	-0.0350469	-0.00578235	0.0257376	0.191204	0.99988	0.404982	0.707507	0.0121568	0.0693975	-0.026892
P28665	MUG1	P28665_MUG1	0.0676387	-0.0394883	0.0071955	-0.100051	-0.150401	0.0426443	0.377401	-0.0954196	-0.0439433	-0.0262051	0.0398403	0.299831	0.0186342	-0.177882	-0.0350469	0.195348	-0.118727	-0.246395	0.879215	0.965111	0.953291	0.982221	-0.0277969	0.0347806	-0.0607405
P19783	COX4I1	P19783_COX4I1	0.0129262	0.0398403	0.117695	0.0935602	0.154454	0.0243197	0.0799754	-0.0619024	0.136191	0.0071955	0.0989585	-0.00578235	0.0172093	0.187768	-0.011588	-0.0908029	-0.00433459	-0.0439433	0.13495	0.999998	0.999095	0.131732	0.0132751	-0.049491	-0.0944659
P08032	SPTA1	P08032_SPTA1	-0.00868224	-0.0174171	0.0370307	0.0243197	-0.204233	0.342555	0.243669	0.0676387	0.367371	-0.284546	-0.293359	0.488515	0.105678	-0.125006	-0.0454314	0.158337	-0.172994	-0.205896	0.469289	0.624976	0.993979	0.934366	0.23585	-0.132825	-0.117031
P01027	C3	P01027_C3	-0.018878	0.0468403	-0.0232698	-0.0499049	-0.139236	-0.248108	0.169925	-0.0846703	-0.22095	-0.046921	0.197865	0.293959	0.136191	-0.237864	-0.251539	-0.275786	-0.258425	-0.413115	0.0161323	0.673284	0.759902	0.040774	-0.118162	0.157265	-0.246032
Q9DB77	UQCRC2	Q9DB77_UQCRC2	-0.013043	-0.0159576	-0.0603973	0.0243197	0.0071955	-0.176251	-0.114035	-0.0320936	-0.0588937	-0.104697	-0.112475	0.0257376	-0.0232698	-0.0877334	-0.136062	-0.142417	-0.115597	0.121679	0.707275	0.55688	0.734561	0.673276	-0.0443934	-0.0732331	-0.111329
Q8BFR5	TUFM	Q8BFR5_TUFM	0.0200577	-0.011588	-0.0679388	0.0827026	0.0565835	-0.129734	-0.0800879	-0.0573917	-0.00433459	0.0100637	-0.0439433	-0.0573917	-0.0649175	-0.0969617	-0.15682	-0.15682	-0.0365259	-0.00288828	0.270553	0.541803	0.434497	0.134689	-0.0616265	-0.0616265	-0.100908
P26039	TLN1	P26039_TLN1	-0.00578235	0.0565835	0.112367	-0.0528949	-0.0513992	0.83996	0.183963	0.822934	0.504875	0.0384362	0.0758749	0.449957	0.856787	0.231432	0.178874	0.698663	0.587845	0.418999	0.160192	0.113579	0.324178	0.125368	0.479474	0.206031	0.478021
P42125	ECI1	P42125_ECI1	-0.00433459	0.0482362	-0.0380063	0.0356239	0.111031	-0.00868224	-0.00288828	0.0593553	0.0524159	0.0426443	0.00432161	-0.0424568	-0.0144996	-0.00288828	0.0299829	0.0257376	-0.00288828	0.116365	0.315653	0.562738	0.940523	0.59831	0.0367712	-0.0185329	0.0122156
Q91VB8	HBA-A1	Q91VB8_HBA-A1	0.0758749	-0.0380063	0.0229004	0.214125	-0.125006	0.46048	0.522056	0.0731347	0.426533	-0.172994	-0.332789	0.679874	0.259423	-0.187707	-0.336428	0.15056	-0.148801	-0.293359	0.232041	0.603979	0.999208	0.566056	0.377145	-0.222382	-0.270468
Q3UGX2	SPTB	Q3UGX2_SPTB	-0.00578235	-0.0306192	0.0426443	0.0398403	-0.171368	0.37629	0.273814	0.0579701	0.306845	-0.0908029	-0.0969617	0.517024	0.175045	0.0370307	-0.0892673	0.172488	-0.0454314	-0.139236	0.443255	0.489322	0.790241	0.985184	0.256785	0.0200017	-0.0843783
A0A1L1STE6	IDH3A	A0A1L1STE6_IDH3A	0.0214797	-0.00433459	-0.0144996	0.0635029	0.0426443	-0.121863	-0.0679388	0.102994	0.0086303	0.0086303	-0.0528949	0.0976108	0.041243	-0.0218044	-0.0424568	0.0593553	-0.0159576	0.14274	0.839118	0.920174	0.999941	0.959144	5.7745e-05	5.7745e-05	0.0131263
P48787	TNNI3	P48787_TNNI3	-0.0528949	-0.027675	-0.101598	-0.0394883	-0.0513992	-0.117161	-0.110916	0.0949116	0.0129262	0.0426443	0.0299829	0.151859	0.125651	0.0593553	-0.155213	0.0745054	-0.0846703	0.0827026	0.0785549	0.957183	0.0543328	0.864908	-0.0052076	0.105547	0.0411091
Q60930	VDAC2	Q60930_VDAC2	0.0114956	-0.0513992	-0.0144996	0.0071955	-0.0262051	-0.0954196	-0.0558912	-0.128156	-0.0558912	0.00575927	0.0114956	-0.0484122	-0.0174171	0.144046	-0.0846703	-0.0831412	-0.0365259	0.0143553	0.0691668	0.228181	0.697099	0.640474	-0.0522391	0.00941132	-0.0561815
Q5SXR6	CLTC	Q5SXR6_CLTC	0.0356239	-0.00433459	0.0745054	-0.0484122	-0.018878	0.108357	0.0690147	0.0538064	0.0482362	0.0384362	0.0813396	0.0086303	0.045443	0.0648829	0.112367	0.0908534	0.120352	0.0172093	0.198272	0.44366	0.534159	0.0895726	0.0381617	0.0297983	0.0859655
Q61292	LAMB2	Q61292_LAMB2	0.0313952	0.00432161	0.0129262	-0.131313	0.0086303	-0.00868224	0.0384362	0.0908534	0.0071955	-0.0335695	0.0100637	-0.0424568	-0.00288828	-0.00868224	0.117695	0.0370307	0.0690147	0.0114956	0.0858357	0.325995	0.996605	0.0771223	6.395e-06	-0.0173061	0.0443988
Q99NB1	ACSS1	Q99NB1_ACSS1	0.0356239	0.0243197	-0.0573917	0.0648829	0.0214797	-0.152003	-0.15682	-0.07552	-0.0365259	-0.148801	-0.112475	-0.263612	-0.161653	-0.013043	-0.0454314	-0.15682	-0.169745	-0.0291463	0.0510181	0.178395	0.0204205	0.109697	-0.105492	-0.178773	-0.131097
A0A0R4J0X5	SERPINA1C	A0A0R4J0X5_SERPINA1C	0.0328061	0.0186342	0.0384362	-0.134477	-0.139236	-0.0174171	0.275007	-0.131313	-0.0439433	0.0468403	0.0745054	0.324235	0.0257376	-0.209228	-0.150401	-0.0350469	-0.237864	-0.305788	0.176104	1	0.859499	0.286478	-0.0696634	0.0211202	-0.219853
Q8BH59	SLC25A12	Q8BH59_SLC25A12	-0.00723157	0.0186342	-0.011588	0.0313952	0.0676387	-0.0694519	0.0143553	0.0186342	0.0690147	0.00288251	-0.00144342	-0.0424568	-0.0573917	0.192825	0.0071955	-0.0394883	0.0468403	0.0551957	0.992393	0.983918	0.987921	0.993094	0.0129329	-0.00714474	0.0213166
Q99LC3	NDUFA10	Q99LC3_NDUFA10	0.015783	0.0299829	-0.0144996	0.0799754	0.137504	-0.0800879	-0.0320936	0.0313952	0.0538064	0.0426443	-0.0394883	0.0676387	0.0745054	-0.0320936	-0.00578235	0.0370307	0.0271541	-0.07552	0.874703	0.99787	0.998414	0.79339	0.00851225	0.0197614	-0.0121971
P62259	YWHAE	P62259_YWHAE	-0.00288828	0.0243197	0.0229004	0	-0.0218044	-0.00723157	-0.0528949	-0.00288828	0.00288251	0.00144197	0.00288251	-0.0877334	-0.00433459	-0.0694519	0.0384362	0.0243197	-0.00868224	0.015783	0.0712775	0.366525	0.103402	0.976981	-0.0186818	-0.0157848	0.00860115
P23927	CRYAB	P23927_CRYAB	0.051024	-0.0159576	-0.107803	-0.011588	0.0313952	0.0328061	0.0114956	-0.0499049	-0.104697	0.0854247	0.0813396	0.0200577	0.0086303	-0.0649175	-0.101598	-0.018878	-0.0528949	-0.046921	0.252087	0.997934	0.482255	0.733297	0.0252684	0.0338305	-0.0361352
Q9CR68	UQCRFS1	Q9CR68_UQCRFS1	-0.0365259	-0.0247367	-0.0816138	0.0071955	-0.0291463	-0.16004	-0.0908029	-0.0969617	-0.0800879	-0.109359	-0.104697	-0.132894	-0.109359	-0.0892673	-0.110916	-0.147202	-0.0923402	-0.0558912	0.0357191	0.077504	0.0194655	0.0464875	-0.0601716	-0.0787277	-0.0709968
Q91VA7	IDH3B	Q91VA7_IDH3B	0.136191	0.0538064	0.0758749	0.283329	0.260628	-0.0320936	0.136191	-0.0394883	0.102994	0.15056	0.0440443	-0.00723157	0.0129262	-0.093879	-0.112475	-0.128156	-0.0394883	-0.0247367	0.0406005	0.766953	0.223043	0.0207947	-0.00303895	-0.0931068	-0.182015
P26041	MSN	P26041_MSN	-0.0262051	0.0086303	0.0328061	-0.0664274	-0.0454314	0.0299829	-0.0543923	0.0635029	-0.011588	-0.0101344	0.0313952	-0.0954196	-0.0380063	-0.0439433	0.102994	0.0745054	0.0200577	-0.0335695	0.23369	0.984684	0.899626	0.326216	-0.0028006	-0.0292189	0.056069
Q9CPP6	NDUFA5	Q9CPP6_NDUFA5	-0.0439433	0.0299829	-0.046921	0.0840643	0.187768	-0.0740006	-0.0558912	-0.0320936	0.0398403	0.0271541	-0.018878	-0.0350469	0.0114956	-0.0484122	-0.046921	-0.0291463	0.015783	-0.123434	0.640097	0.997204	0.959838	0.612568	-0.0251134	-0.0118978	-0.0310535
P48678	LMNA	P48678_LMNA	-0.0101344	0.00432161	0.0114956	-0.161653	-0.103147	-0.00723157	0.015783	0.0922074	-0.0892673	-0.0174171	0.0989585	-0.115597	0.0551957	-0.027675	0.202888	0.0440443	0.121679	0.041243	0.103302	0.96089	0.820823	0.0644398	-0.00432517	-0.0145107	0.085768
P68372	TUBB4B	P68372_TUBB4B	0.041243	-0.0380063	0.0143553	0.0200577	-0.0159576	-0.0101344	-0.0101344	-0.0232698	-0.0409718	0.00144197	-0.027675	-0.0365259	-0.00723157	-0.121863	-0.0800879	-0.0513992	0.0172093	-0.0159576	0.282602	0.504123	0.170421	0.284395	-0.0331641	-0.0448815	-0.0508849
Q4U4S6-2	XIRP2	Q4U4S6-2_XIRP2	0.0370307	-0.0649175	-0.027675	-0.0203404	0.0214797	0.041243	-0.0365259	-0.140826	-0.142417	0.0129262	-0.0439433	-0.0573917	-0.107803	-0.171368	-0.132894	-0.0831412	-0.00868224	-0.0394883	0.66099	0.809593	0.496501	0.636643	-0.0125182	-0.033384	-0.0373071
P60710	ACTB	P60710_ACTB	0.0635029	-0.0159576	0.0496308	0.0398403	0.0271541	0.342555	0.172488	0.312665	0.191563	0.138814	0.0799754	0.228973	0.374066	0.0214797	0.108357	0.27262	0.290424	0.168642	0.109793	0.0751251	0.197019	0.0922193	0.146827	0.0940784	0.175895
A0A0A0MQA5	TUBA4A	A0A0A0MQA5_TUBA4A	0.00432161	-0.0232698	-0.013043	0.00144197	-0.0634092	-0.0159576	-0.046921	-0.00144342	-0.0218044	-0.0174171	-0.0439433	-0.0291463	-0.0203404	-0.0985055	-0.046921	-0.0335695	0.0071955	-0.0203404	0.285154	0.435004	0.148785	0.707311	-0.0160039	-0.0233458	-0.0211544
G5E902	SLC25A3	G5E902_SLC25A3	0.0356239	0.0328061	0.045443	-0.027675	0.0908534	0.10165	0.0579701	0.0989585	0.197865	0.0579701	0.134878	0.0172093	0.134878	0.54201	0.187768	0.108357	0.180148	0.176323	0.254244	0.555046	0.159596	0.248084	0.0647435	0.100663	0.14402
Q3U2G2	HSPA4	Q3U2G2_HSPA4	-0.0101344	-0.018878	0	0.0172093	-0.0603973	0.0398403	-0.0528949	0.00432161	-0.0174171	0.0186342	-0.0320936	-0.018878	-0.0528949	-0.148801	-0.0365259	-0.0159576	-0.00288828	-0.0350469	0.469669	0.913264	0.298185	0.836281	-0.0123499	-0.0270264	-0.020435
A2AFQ2	HSD17B10	A2AFQ2_HSD17B10	-0.0320936	0.0313952	-0.0694519	-0.00723157	0.105678	-0.00144342	0.0271541	-0.0424568	0.0186342	0.0799754	0.0285692	0.0143553	0	-0.0262051	-0.0409718	-0.0649175	0.0854247	-0.011588	0.569474	0.502823	0.54258	0.977376	0.0382968	0.0340179	-0.00661732
Q9DB20	ATP5O	Q9DB20_ATP5O	-0.0800879	-0.0232698	-0.0800879	-0.0724828	-0.0513992	-0.14401	-0.190997	0.112367	-0.0203404	-0.131313	-0.0679388	-0.0740006	-0.0409718	0.0524159	-0.0985055	-0.0291463	-0.120294	0.0676387	0.989017	0.999394	0.993106	0.976031	0.0248862	0.00834655	0.0124595
Q91ZJ5	UGP2	Q91ZJ5_UGP2	0.0384362	0.0229004	-0.018878	0.0398403	0.0648829	0.177599	0.0962619	-0.0709665	0.0299829	0.24732	0.144046	0.226509	0.0758749	-0.077041	-0.123434	-0.0785637	0.0440443	-0.0603973	0.073257	0.858651	0.263218	0.52953	0.0342146	0.113378	-0.100149
Q8K3J1	NDUFS8	Q8K3J1_NDUFS8	-0.0203404	0.041243	0.00575927	0.077243	0.128293	-0.0573917	-0.0800879	-0.046921	0.0703893	0.0313952	-0.0291463	-0.0573917	0.0143553	-0.0831412	-0.0144996	-0.0232698	-0.0262051	-0.177882	0.346525	0.919754	0.562402	0.219195	-0.0704221	-0.0526474	-0.0482386
Q9DC69	NDUFA9	Q9DC69_NDUFA9	-0.0101344	0.0271541	0.0172093	0.121679	0.180148	-0.0499049	-0.00868224	-0.0101344	0.0962619	-0.00144342	-0.0144996	-0.0969617	-0.0513992	0.214125	-0.0101344	-0.0291463	-0.0603973	-0.305788	0.22534	0.999964	0.954505	0.1929	-0.0308639	-0.0366813	-0.0669535
Q9DCS9	NDUFB10	Q9DCS9_NDUFB10	-0.0262051	-0.00723157	-0.0499049	0.0243197	0.102994	-0.114035	-0.0454314	0.0214797	0.0524159	0.0370307	-0.018878	-0.0350469	0.0313952	0.0271541	0.0100637	0.0200577	0.0342157	-0.100051	0.927901	0.933068	0.878517	0.997773	0.038198	0.0438724	0.031779
Q924X2	CPT1B	Q924X2_CPT1B	0.0524159	-0.027675	0.0143553	0.00575927	-0.0409718	-0.0203404	-0.027675	-0.100051	0.0243197	0.0299829	0.0607392	-0.093879	-0.0174171	0.365133	0.0328061	-0.0664274	-0.018878	0.0299829	0.46116	0.844343	0.721806	0.989868	-0.0377323	0.0199256	-0.00450483
P34914	EPHX2	P34914_EPHX2	0.0114956	-0.00144342	-0.0454314	0.105678	0.0635029	-0.0923402	-0.0634092	-0.0409718	-0.0144996	0.0565835	-0.0892673	-0.0573917	-0.0634092	-0.103147	0.0313952	-0.0306192	-0.0394883	0	0.353737	0.47787	0.208892	0.832113	-0.0459979	-0.0684353	-0.0203357
Q9D2G2	DLST	Q9D2G2_DLST	-0.0380063	-0.0513992	-0.0785637	-0.00723157	0	-0.169745	-0.139236	-0.0694519	-0.0603973	-0.077041	-0.123434	-0.120294	-0.0892673	-0.0908029	-0.15682	-0.140826	-0.132894	-0.0694519	0.108933	0.336038	0.174071	0.0499373	-0.0247491	-0.0461002	-0.0921573
P06745	GPI	P06745_GPI	0.0143553	-0.0291463	0.0257376	0.0243197	0.0186342	0.0143553	0.0129262	-0.00288828	-0.0306192	0.0648829	0.0114956	-0.0262051	-0.0424568	0.0086303	0	0.0086303	-0.027675	-0.077041	0.501303	0.982107	0.987788	0.37324	-0.0064113	-0.0107072	-0.033175
B1ARU1	MACF1	B1ARU1_MACF1	-0.027675	-0.0159576	0.00144197	-0.0101344	-0.0588937	0.0129262	-0.0588937	-0.0218044	-0.0365259	-0.0528949	-0.0247367	-0.0306192	0.0356239	0.0565835	0.0758749	0.0200577	-0.018878	-0.0785637	0.651577	0.82865	0.970582	0.949214	-0.0234799	-0.0116907	0.0136359
Q80XB4	NRAP	Q80XB4_NRAP	0.0593553	-0.0247367	-0.0101344	0.00144197	-0.0409718	0.0271541	-0.121863	-0.231075	-0.132894	-0.00433459	-0.0573917	-0.086201	-0.0985055	-0.110916	-0.0740006	-0.0664274	-0.0306192	-0.013043	0.111327	0.0520149	0.178305	0.489164	-0.117517	-0.0818548	-0.0441771
O55126	NIPSNAP2	O55126_NIPSNAP2	-0.013043	0.0356239	-0.0528949	0.00432161	0.0313952	-0.21424	-0.142417	-0.0335695	-0.0218044	-0.176251	-0.15682	-0.242977	-0.142417	-0.0694519	-0.158429	-0.253257	-0.212568	-0.0247367	0.0392251	0.439603	0.0340102	0.0384921	-0.0292088	-0.152459	-0.181138
Q04857	COL6A1	Q04857_COL6A1	0.141433	-0.0484122	0.0482362	-0.093879	-0.0664274	0.189034	0.120352	0.0482362	-0.0394883	0.0717627	0.211635	-0.153607	0.0271541	-0.0588937	0.191563	0.0621217	0.243669	0.0384362	0.431448	0.919935	0.999184	0.331096	0.0483242	0.0272421	0.12693
P47738	ALDH2	P47738_ALDH2	-0.027675	0	-0.0603973	-0.0159576	-0.0724828	-0.293359	-0.14401	-0.0159576	-0.0649175	-0.155213	-0.152003	-0.174621	-0.110916	-0.101598	-0.106249	-0.150401	-0.1976	-0.07552	0.0903621	0.132761	0.0569902	0.0932353	-0.0506665	-0.130187	-0.106509
Q9QXX4	SLC25A13	Q9QXX4_SLC25A13	0.0214797	0.0313952	-0.0320936	0.0621217	0.117695	0.107018	0.0356239	0.0786098	0.132248	0.0813396	0.0690147	0.0172093	0.0370307	0.22404	0.0426443	0.0867838	0.151859	0.15056	0.178838	0.172513	0.246442	0.113825	0.0805806	0.0425772	0.0922344
P26231	CTNNA1	P26231_CTNNA1	0.0690147	-0.00868224	-0.0740006	0.0579701	0.109695	-0.0144996	-0.0350469	-0.112475	-0.0439433	0.0662614	0.0482362	-0.0454314	0.0342157	-0.0365259	0.0496308	-0.00578235	0.0482362	0.0621217	0.581676	0.796289	0.999864	0.855995	-0.0596908	0.00957177	0.0242896
D9J302	PDLIM5	D9J302_PDLIM5	0.0524159	0.0214797	-0.0439433	0.0635029	0.0935602	0.0593553	0.0328061	-0.0954196	-0.0159576	0.113701	0.0593553	0.0440443	0.0524159	-0.0800879	-0.0424568	-0.013043	0.051024	0.041243	0.904675	0.993617	0.970415	0.97616	-0.0041417	0.0154681	-0.0228478
Q9D0M3	CYC1	Q9D0M3_CYC1	-0.0144996	-0.0558912	-0.0262051	0.0356239	0.0114956	-0.0709665	-0.0588937	-0.0513992	0.0328061	-0.112475	-0.0454314	-0.0634092	-0.0380063	0.240009	0.015783	-0.0740006	-0.0159576	0.102994	0.940429	0.993155	0.994356	0.966114	-0.0310469	-0.025079	0.020265
P17563	SELENBP1	P17563_SELENBP1	0.0086303	0.0243197	0.0799754	-0.0543923	-0.093879	-0.013043	-0.027675	0.0786098	0.00144197	0.0214797	0.045443	-0.027675	0.00144197	-0.0262051	0.0384362	0.0384362	-0.0573917	0.0186342	0.876759	0.779802	0.96899	0.997604	-0.029518	-0.015033	0.0120602
Q02053	UBA1	Q02053_UBA1	-0.00723157	0.0356239	0.0440443	-0.0144996	-0.0649175	0.0482362	-0.0499049	0.0229004	0.015783	-0.0380063	-0.0306192	-0.0724828	-0.046921	-0.109359	0.0285692	0.00144197	-0.0528949	-0.0603973	0.0726373	0.785485	0.0363128	0.461796	0.00158683	-0.0611172	-0.0399226
Q9D6J6	NDUFV2	Q9D6J6_NDUFV2	-0.0306192	-0.00578235	-0.0740006	0.0398403	0.112367	-0.147202	-0.0892673	0.00144197	0.0100637	0.0214797	-0.07552	0.0356239	0.104337	-0.027675	-0.0218044	-0.00578235	0.0100637	-0.0877334	0.836542	0.999145	0.866256	0.995985	0.0196427	0.0396805	0.0044074
E9QQ25	SPEG	E9QQ25_SPEG	-0.0144996	0.045443	0.0071955	0.0114956	-0.00723157	-0.0649175	-0.0619024	0.0200577	0.00144197	-0.0543923	-0.0603973	-0.100051	-0.0679388	-0.0174171	-0.011588	-0.0573917	-0.0923402	-0.0528949	0.0205029	0.283159	0.0123637	0.0300992	-0.0165771	-0.0697428	-0.0644889
A0A087WSN6	FN1	A0A087WSN6_FN1	-0.0218044	0.0635029	0.0285692	0.0214797	-0.32916	-0.0262051	0.233888	-0.121863	-0.172994	0.0538064	-0.0232698	0.22033	0.0867838	-0.340075	-0.212568	-0.212568	-0.137648	-0.409278	0.14265	0.663851	0.993051	0.0992252	-0.146887	0.0287819	-0.237592
P29758	OAT	P29758_OAT	0.0271541	0.00144197	-0.0291463	0.00432161	-0.027675	0.0214797	0.0186342	-0.077041	-0.0424568	-0.018878	0.051024	-0.0218044	-0.0365259	-0.115597	-0.0664274	-0.0649175	0.00432161	-0.027675	0.619474	0.776253	0.620505	0.441812	-0.0305568	-0.0246862	-0.049178
Q9Z2I8	SUCLG2	Q9Z2I8_SUCLG2	-0.0588937	0.0607392	-0.0634092	0	-0.101598	-0.112475	-0.139236	-0.106249	-0.0619024	-0.0969617	-0.0409718	-0.286304	-0.128156	-0.120294	0.0285692	-0.0424568	-0.131313	0.0257376	0.0540931	0.161387	0.0485864	0.979488	-0.0768021	-0.0908472	0.0210872
O54724	CAVIN1	O54724_CAVIN1	-0.00868224	0.0186342	0.0565835	-0.0335695	0.0229004	0.0129262	0.0100637	0.0827026	-0.0484122	-0.00723157	0.0731347	-0.0499049	-0.011588	-0.0588937	0.0271541	0.0271541	-0.013043	-0.0232698	0.796956	0.985455	0.842093	0.998552	0.00795022	-0.016564	0.00207957
P27773	PDIA3	P27773_PDIA3	0.0342157	-0.0424568	0.0827026	-0.0513992	-0.0528949	0.166073	0.0468403	0.0935602	-0.0159576	0.10165	0.077243	0.051024	0.116365	-0.0603973	0.0827026	0.0989585	0.0962619	0.0243197	0.541241	0.688917	0.551626	0.364701	0.0509609	0.0813636	0.0936028
Q9D881	GM11273	Q9D881_GM11273	-0.0573917	-0.00144342	-0.0543923	0.0285692	0.0635029	-0.123434	-0.103147	0.0551957	0.0071955	-0.00288828	-0.00433459	0.0482362	0.045443	-0.00868224	-0.0816138	-0.00578235	-0.0350469	0.0799754	0.776189	0.999988	0.702395	0.989327	0.0351134	0.0250296	0.00750324
P09103	P4HB	P09103_P4HB	-0.011588	-0.0424568	0.0894981	-0.0923402	-0.0724828	0.128293	-0.00578235	0.0949116	-0.0159576	0.00575927	-0.00144342	0.0468403	0.015783	-0.0785637	0.0186342	0.0313952	0.0313952	-0.0513992	0.815923	0.679255	0.984671	0.930294	0.0212401	0.0327817	0.0520371
P09671	SOD2	P09671_SOD2	-0.0174171	0.0565835	0.0200577	0.0313952	0.0370307	-0.0877334	-0.134477	0.306845	0.0468403	-0.0588937	-0.0409718	-0.0694519	-0.0740006	0.200379	0.00144197	0.249749	-0.121863	0.045443	0.936532	0.998497	0.969311	0.991446	0.0113043	-0.0846202	-0.00228396
Q61768	KIF5B	Q61768_KIF5B	-0.011588	-0.0394883	-0.00144342	0.015783	-0.013043	0.00432161	-0.0335695	-0.0528949	-0.0709665	0.015783	-0.0203404	-0.0454314	-0.027675	-0.147202	-0.0603973	-0.0513992	-0.013043	-0.0306192	0.583165	0.685508	0.407386	0.582989	-0.0270538	-0.0211593	-0.0344935
J3QMG3	VDAC3	J3QMG3_VDAC3	-0.0247367	0.0229004	-0.00723157	-0.0262051	-0.0588937	-0.0634092	-0.0846703	-0.120294	-0.0439433	-0.0603973	-0.0649175	-0.121863	-0.0831412	0.0342157	-0.0985055	-0.145605	-0.0954196	-0.0740006	0.0257889	0.0607339	0.168454	0.0103432	-0.0474251	-0.0489334	-0.0809784
A0A1B0GS91	SVIL	A0A1B0GS91_SVIL	-0.00144342	0.0172093	0.0071955	-0.0513992	0.00144197	0.041243	-0.0394883	0.0086303	-0.00723157	-0.0424568	-0.00868224	-0.086201	-0.0694519	-0.0679388	0.0635029	0.051024	0.0468403	0.0257376	0.000761458	0.944301	0.052078	0.0374049	-0.00143407	-0.0708148	0.0460561
P97450	ATP5J	P97450_ATP5J	-0.115597	-0.0247367	-0.112475	-0.0306192	0.0384362	-0.205896	-0.152003	-0.018878	-0.0394883	-0.00578235	-0.0350469	0.00575927	0.0786098	-0.0679388	-0.137648	-0.00288828	-0.0513992	0.187768	0.468974	0.999637	0.576519	0.573865	0.0320588	0.0657647	0.0444034
Q8QZS1	HIBCH	Q8QZS1_HIBCH	0.0214797	-0.00868224	-0.0694519	0.0731347	0.102994	-0.101598	-0.0232698	-0.0573917	0.0100637	0.045443	-0.0262051	-0.0424568	-0.0306192	-0.0831412	-0.129734	-0.0923402	0.0313952	0.0579701	0.872526	0.960738	0.835451	0.786795	-0.0296685	-0.0370179	-0.0368712
S4R1P5	DST	S4R1P5_DST	-0.018878	-0.0365259	0.0186342	0.00432161	0.00144197	0.0114956	-0.0101344	-0.0101344	-0.0603973	-0.0174171	-0.0247367	-0.0724828	-0.0528949	0.0662614	-0.0101344	-0.00433459	0.0243197	-0.0439433	0.952299	0.991545	0.921125	0.999997	-0.00285621	-0.0174585	4.37e-05
Q08857	CD36	Q08857_CD36	0.0758749	0.0496308	0.0989585	-0.0558912	0.105678	0.206643	0.129613	-0.046921	0.140124	0.0827026	0.24245	-0.0203404	0.123004	0.536053	0.323082	0.153157	0.221568	0.178874	0.245263	0.803867	0.252995	0.185779	0.0668602	0.0602512	0.137468
P57780	ACTN4	P57780_ACTN4	0.0257376	-0.0174171	0.0621217	-0.0831412	-0.109359	0.132248	0.0328061	0.119024	-0.0174171	0.0086303	0.0551957	0.0071955	0.0827026	-0.0144996	0.171207	0.113701	0.0976108	0.015783	0.257246	0.802521	0.846473	0.139591	0.0286458	0.00447005	0.101496
E9Q9C1	ABLIM1	E9Q9C1_ABLIM1	0.0370307	0.0538064	-0.0664274	0.0854247	0.0827026	-0.011588	0.00144197	-0.086201	0.00288251	0.0894981	0.0758749	-0.0543923	-0.00578235	-0.0649175	0.0243197	-0.0619024	-0.0101344	0.0370307	0.88491	0.812204	0.933409	0.826768	-0.0439766	-0.0512009	-0.0383259
Q8CGK3	LONP1	Q8CGK3_LONP1	0.0086303	0.0114956	-0.0335695	0.0482362	0.0496308	-0.118727	-0.0908029	-0.103147	-0.0365259	-0.0513992	-0.0603973	-0.104697	-0.0724828	-0.132894	-0.0831412	-0.117161	-0.0558912	-0.00433459	0.0712331	0.130683	0.0332001	0.1208	-0.100866	-0.0825458	-0.0795792
O35129	PHB2	O35129_PHB2	-0.00288828	0.0384362	-0.0709665	0.0398403	0.123004	-0.018878	-0.027675	-0.00433459	0.0827026	-0.0247367	0.0186342	-0.00288828	0.0257376	0.045443	0.0299829	0.0398403	0.0496308	0.113701	0.394957	0.687879	0.970647	0.266905	-0.0221085	0.00086024	0.0269616
Q9QVP4	MYL7	Q9QVP4_MYL7	0.24732	-0.405451	0.737254	-1.19429	-0.902389	0.440421	0.546956	0.575312	-0.110916	-0.254978	0.228973	0.605968	0.200379	0.0257376	0.154454	0.425459	0.327687	-0.24127	0.819869	0.815829	0.730682	0.749756	0.519486	0.279444	0.320136
E9Q6R7	UTRN	E9Q6R7_UTRN	0.0342157	-0.027675	0.120352	-0.115597	-0.103147	0.0799754	0.124328	0.0813396	-0.0291463	-0.0603973	0.0299829	-0.0291463	0.0071955	-0.0439433	0.206643	0.128293	0.164786	0.0593553	0.0418166	0.901999	0.946412	0.0593525	0.076705	-0.0324167	0.143269
A1BN54	ACTN1	A1BN54_ACTN1	0.00575927	0.0827026	0.0524159	-0.125006	-0.120294	0.27739	0.0799754	0.235114	0.104337	0.0172093	0.145351	0.115033	0.22033	0.0086303	0.206643	0.210389	0.187768	0.0229004	0.306277	0.349325	0.448869	0.17521	0.0752494	0.0859454	0.168118
Q8JZQ2	AFG3L2	Q8JZQ2_AFG3L2	0.0214797	0.0342157	0.0551957	-0.0335695	0.173767	0.217851	0.132248	0.14274	0.253384	0.126973	0.275007	0.077243	0.138814	0.707525	0.24123	0.212881	0.288063	0.285698	0.0884233	0.239463	0.0547891	0.0811879	0.145919	0.110966	0.235616
Q6URW6-2	MYH14	Q6URW6-2_MYH14	-0.0439433	-0.0365259	0.0243197	0.00144197	-0.0649175	-0.103147	-0.0908029	-0.0306192	-0.046921	-0.0558912	-0.0262051	-0.115597	-0.107803	-0.0306192	0	-0.0454314	-0.0484122	-0.110916	0.174989	0.125989	0.125945	0.383814	-0.0473755	-0.0383492	-0.0293798
P56391	COX6B1	P56391_COX6B1	-0.0424568	-0.0439433	-0.0969617	0.0313952	0.0840643	-0.169745	-0.0499049	0.0426443	-0.0306192	-0.00144342	-0.0679388	0.0482362	0.0482362	0.0071955	-0.0291463	0.00432161	-0.0291463	0.0908534	0.683532	0.981883	0.64043	0.641333	0.0125809	0.0503956	0.0307877
P14733	LMNB1	P14733_LMNB1	-0.0232698	0.0172093	0.0648829	-0.086201	-0.0409718	-0.0439433	-0.0365259	0.119024	-0.00288828	-0.112475	0.00144197	-0.195946	-0.0232698	0.0200577	0.158337	0.0398403	0.00288251	0.0342157	0.168207	0.998782	0.561191	0.47302	-0.0334957	-0.0202396	0.0400583
E9Q8I0	CFH	E9Q8I0_CFH	0.0285692	0.0579701	-0.086201	0.0200577	-0.237864	-0.0892673	0.319618	-0.0543923	-0.194295	0.169925	0.0426443	0.271426	0.175045	-0.242977	-0.0709665	-0.0800879	0.0799754	-0.136062	0.568469	0.919058	0.821158	0.9277	-0.113581	0.145612	-0.0998407
Q9JLV1	BAG3	Q9JLV1_BAG3	0	-0.0247367	-0.077041	0.0342157	-0.0203404	-0.046921	-0.106249	-0.0954196	-0.07552	-0.00288828	-0.013043	-0.0694519	-0.0740006	-0.147202	-0.145605	-0.104697	-0.0877334	-0.0664274	0.112234	0.238013	0.346521	0.0472049	-0.0631517	-0.0570835	-0.0838469
Q3UTJ2-2	SORBS2	Q3UTJ2-2_SORBS2	0.102994	-0.0174171	-0.0558912	-0.0101344	0.0328061	0.0398403	0.00432161	-0.0649175	-0.0985055	0.0579701	0.0976108	-0.0954196	-0.0247367	-0.0649175	0.0299829	-0.0174171	0.077243	0.0690147	0.627506	0.920387	0.989162	0.793293	0.0180974	-0.010961	0.0632745
P21981	TGM2	P21981_TGM2	0.0342157	-0.0724828	-0.0159576	0.0086303	-0.0350469	0.0935602	0.109695	-0.0424568	-0.0558912	0.16092	0.126973	0.169925	0.0731347	-0.077041	-0.0664274	0.0285692	0.104337	-0.0174171	0.267716	0.93024	0.175991	0.94965	-0.0313833	0.130637	0.0092397
Q8K0E8	FGB	Q8K0E8_FGB	-0.171368	0.175045	-0.0513992	0.051024	-0.177882	0.876566	0.647084	0.637842	0.288063	0.423309	0.157044	1.06281	0.977463	0.22404	-0.148801	0.296311	0.303342	0.115033	0.0834009	0.151639	0.0614047	0.879634	0.63803	0.423497	0.20586
A2ASS6-3	TTN	A2ASS6-3_TTN	-0.00288828	0.0342157	-0.0291463	-0.0424568	0.0551957	0.0129262	0.0271541	-0.0203404	0.0086303	0.0538064	0.077243	0.0243197	0.0579701	-0.00288828	0.0496308	0.0384362	0.0813396	0.0621217	0.0210741	0.386342	0.0412542	0.0121255	0.0289435	0.0698237	0.0718935
Q8BH64	EHD2	Q8BH64_EHD2	-0.018878	0.0827026	0.0524159	-0.0877334	0.0676387	0.0593553	0.0881416	0.105678	0.0867838	-0.00144342	0.0840643	-0.0144996	0.0071955	0.0989585	0.260628	0.107018	0.100305	0.0229004	0.0987925	0.247236	0.856337	0.0616856	0.0700148	-0.00957345	0.0868926
E9Q8T1	TACC2	E9Q8T1_TACC2	-0.0247367	0.0114956	-0.112475	0.0398403	-0.0218044	-0.104697	-0.0985055	-0.0846703	-0.0892673	0.0313952	-0.101598	-0.07552	-0.0291463	-0.140826	0.121679	0.0143553	0.0579701	0.164786	0.00373394	0.346383	0.592267	0.0458329	-0.0826467	-0.0688995	0.0964451
Q9Z2Z6	SLC25A20	Q9Z2Z6_SLC25A20	0.0482362	0.0114956	-0.0619024	0.105678	0.0172093	-0.158429	-0.0846703	-0.0740006	0.0114956	-0.0513992	-0.104697	-0.0985055	-0.0664274	0.168642	-0.0679388	-0.182786	-0.128156	-0.0218044	0.248291	0.356045	0.639714	0.13177	-0.103867	-0.0962933	-0.127913
Q8BIJ6	IARS2	Q8BIJ6_IARS2	0.015783	-0.0513992	-0.121863	0.051024	0.077243	-0.168123	-0.0365259	-0.046921	-0.0588937	-0.0543923	-0.150401	-0.115597	-0.07552	-0.0499049	-0.0218044	-0.0573917	-0.0203404	0.0328061	0.375242	0.936239	0.367727	0.992319	-0.0291129	-0.0577119	-0.0032643
P17751	TPI1	P17751_TPI1	0.0243197	-0.0101344	-0.0679388	0.0551957	0.0426443	0.0172093	0.0129262	0.0621217	-0.0159576	0.133564	0.108357	0.0745054	0.133564	0.0328061	-0.0306192	0.0717627	0.0745054	0.16221	0.0587153	0.836038	0.0387272	0.186488	0.0101166	0.101264	0.0660414
P12787	COX5A	P12787_COX5A	-0.0499049	0.0468403	0	0.0129262	0.102994	-0.0454314	-0.107803	0.24732	0.0690147	0.0172093	-0.0101344	0.0398403	0.077243	0.134878	0.0186342	0.199123	-0.0218044	0.146655	0.673145	0.760035	0.774072	0.475454	0.0625516	0.0333772	0.0761815
Q8BGH2	SAMM50	Q8BGH2_SAMM50	0.0370307	0.0285692	0.0243197	0.0426443	0.0607392	-0.00288828	0.015783	-0.0709665	0.0593553	0.0200577	0.0593553	-0.0365259	0.00288251	0.264236	0.0384362	-0.0247367	0.0840643	0.0935602	0.752402	0.950135	0.883118	0.983521	-0.017017	-0.0127423	0.0284503
E9Q414	APOB	E9Q414_APOB	0.121679	0.0579701	-0.176251	0.128293	-0.367732	-0.112475	0.263034	-0.428566	-0.199255	0.0538064	-0.121863	0.077243	-0.15682	-0.347399	-0.181149	-0.334607	-0.189351	-0.367732	0.194735	0.296176	0.605332	0.100346	-0.28908	-0.211688	-0.351804
F8VQC7	KTN1	F8VQC7_KTN1	-0.0320936	-0.0846703	0.0758749	0.0100637	0.0086303	0.0579701	0.00288251	-0.0877334	-0.0846703	0.105678	0.0607392	0.144046	-0.0439433	0.157044	0.0071955	-0.0454314	-0.0923402	-0.177882	0.0331343	0.986388	0.183756	0.415394	0.0138975	0.116693	-0.0578709
Q9CRB9	CHCHD3	Q9CRB9_CHCHD3	-0.0350469	-0.0603973	-0.0159576	-0.0262051	-0.0603973	-0.140826	-0.115597	-0.077041	-0.0380063	-0.086201	-0.0409718	-0.174621	-0.07552	0.126973	-0.0709665	-0.16004	-0.086201	-0.0588937	0.527105	0.527515	0.969875	0.465126	-0.046415	-0.044894	-0.0479578
P20108	PRDX3	P20108_PRDX3	0.0328061	0.0384362	-0.00723157	0.111031	0.180148	-0.0588937	0.0271541	0.0299829	0.0635029	0.0579701	0.0100637	0.0894981	0.0799754	0.015783	-0.0174171	-0.0101344	0.0854247	0.173767	0.992912	0.999215	0.99742	0.982063	-0.00563825	0.0223489	0.002024
Q9CZ19	MYL4	Q9CZ19_MYL4	0.0786098	-0.496142	0.698663	-1.17137	-0.926865	0.411426	0.380729	0.572405	-0.179515	-0.397828	0.194087	0.476122	0.129613	-0.0101344	0.175045	0.404903	0.235114	-0.330973	0.800292	0.788313	0.742439	0.697922	0.589495	0.338379	0.413846
A0A286YCI8	SORBS1	A0A286YCI8_SORBS1	0.0356239	0.0342157	-0.0424568	-0.00723157	0.0328061	-0.0499049	-0.0306192	-0.0528949	-0.0203404	0.0356239	0.0717627	-0.0306192	0.0384362	-0.0573917	0.0243197	-0.0232698	0.0426443	0.0579701	0.354337	0.59531	0.990246	0.822917	-0.0441113	0.0221318	0.0199899
E9QNP0	KXD1	E9QNP0_KXD1	0	-0.046921	-0.0409718	0.0690147	0.0635029	0.0143553	0.0129262	0.0949116	-0.0543923	-0.0101344	-0.0499049	0.0894981	0.0908534	0.00575927	0.041243	0.15056	0.0662614	0.107018	0.146762	0.743294	0.76111	0.0723603	0.0348412	0.0262452	0.107126
Q9CR61	NDUFB7	Q9CR61_NDUFB7	-0.0232698	-0.013043	0.0172093	0.0172093	0.0758749	-0.0409718	0.0214797	0.0100637	0.105678	0.0257376	0.0356239	0.041243	0.0593553	0.320773	0.0894981	0.051024	0.116365	-0.0573917	0.389279	0.858247	0.227888	0.71817	0.0193965	0.0391599	0.0681779
O08788	DCTN1	O08788_DCTN1	0.00288251	-0.0365259	-0.00433459	-0.0291463	-0.0588937	-0.0203404	-0.0892673	-0.0203404	-0.086201	-0.046921	-0.0484122	-0.147202	-0.0800879	-0.139236	-0.0291463	-0.0394883	-0.0573917	-0.0908029	0.0452893	0.277071	0.0158756	0.328741	-0.0421533	-0.0633475	-0.0316996
Q9DCT2	NDUFS3	Q9DCT2_NDUFS3	-0.00578235	0.0468403	-0.0247367	0.051024	0.117695	-0.0740006	-0.0634092	-0.00578235	0.0758749	-0.0320936	-0.0664274	-0.0320936	-0.0159576	-0.00868224	-0.011588	-0.0291463	-0.0159576	-0.168123	0.290825	0.996442	0.515272	0.247739	-0.0263113	-0.0526226	-0.0430809
Q8R4N0	CLYBL	Q8R4N0_CLYBL	-0.0218044	-0.011588	-0.0424568	0.0229004	0.00432161	-0.109359	-0.0588937	-0.027675	-0.0291463	-0.0144996	-0.0306192	-0.0785637	-0.0740006	-0.0954196	-0.0969617	-0.115597	-0.0174171	0.0328061	0.513971	0.615476	0.336314	0.545212	-0.0124501	-0.0573044	-0.0404932
P20918	PLG	P20918_PLG	0.0524159	-0.0232698	0.00575927	-0.109359	-0.0724828	0.183963	0.367371	0.248535	0.167358	0.134878	0.119024	0.469886	0.342555	0.0398403	-0.150401	0.128293	0.0114956	-0.0232698	0.0476105	0.135833	0.0612544	0.999191	0.192718	0.143633	0.00286817
P56565	S100A1	P56565_S100A1	-0.011588	0.0328061	-0.0394883	0.0071955	0.175045	0.0690147	0.0840643	0.180148	0.0538064	0.0551957	-0.00868224	0.0086303	0.0342157	0.0635029	0.0114956	0.187768	0.0786098	0.137504	0.01435	0.014156	0.661794	0.0309844	0.0862605	0.0364119	0.110253
Q3UER8	FGG	Q3UER8_FGG	-0.106249	0.169925	-0.0424568	0.158337	-0.132894	0.78576	0.776525	0.560715	0.240009	0.537048	0.136191	1.16157	1.12829	0.154454	-0.1976	0.210389	0.374066	0.123004	0.103822	0.270481	0.079221	0.97603	0.502775	0.479108	0.108756
O88844	IDH1	O88844_IDH1	-0.0144996	0.00575927	0.10165	-0.0159576	0.0114956	-0.0174171	-0.00723157	0.0114956	0.0257376	0.0172093	-0.0203404	0.0593553	-0.00868224	-0.117161	0.0440443	-0.0203404	-0.0573917	-0.0785637	0.573615	0.94868	0.646152	0.431186	0.0158658	-0.00431208	-0.0344959
P24270	CAT	P24270_CAT	0.0271541	-0.077041	-0.0800879	0.0690147	-0.0306192	-0.0306192	-0.0320936	-0.0846703	0.0551957	-0.12658	-0.28279	0.0100637	-0.0831412	-0.0892673	-0.121863	-0.174621	-0.128156	-0.0785637	0.0860782	0.994919	0.154438	0.126713	-0.00567575	-0.0643238	-0.100066
F8WIV2	SERPINB6A	F8WIV2_SERPINB6A	-0.00723157	0.0370307	0.045443	-0.0603973	-0.0144996	0.100305	0.0370307	0.0867838	0.0172093	0.0482362	0.107018	-0.0365259	0.00288251	-0.00288828	0.121679	0.0962619	0.0813396	0.0635029	0.0924067	0.420992	0.852434	0.0480817	0.0221311	-0.0120171	0.0739012
P97443	SMYD1	P97443_SMYD1	0.0299829	0.0100637	-0.0394883	0.015783	0.0114956	-0.0350469	-0.0484122	-0.103147	-0.0380063	0.00144197	0.0398403	-0.0424568	-0.0679388	-0.0664274	-0.0499049	-0.110916	-0.0831412	-0.103147	0.030992	0.203444	0.488169	0.0120264	-0.0509296	-0.0553802	-0.106067
Q61171	PRDX2	Q61171_PRDX2	-0.00433459	-0.0291463	-0.0203404	0.0229004	-0.0954196	0.10165	0.0593553	0.155749	0.107018	-0.0619024	-0.132894	0.222805	0.0468403	-0.0306192	-0.0394883	0.200379	-0.0694519	-0.0394883	0.744215	0.611699	0.990594	0.984639	0.113987	-0.0182817	-0.0271508
P42932	CCT8	P42932_CCT8	0.0229004	-0.0232698	0.0200577	-0.00144342	-0.0350469	0.0356239	-0.00144342	-0.0262051	-0.0394883	0.0799754	0.00144197	0.0398403	-0.00433459	-0.0846703	0.00432161	-0.0603973	-0.00868224	-0.0499049	0.56289	0.844556	0.999735	0.526778	-0.0355122	-0.00786517	-0.0386007
Q91X72	HPX	Q91X72_HPX	-0.0335695	-0.0892673	-0.0232698	0.124328	-0.26708	0.0496308	0.491597	-0.224317	-0.181149	0.663572	0.379621	0.648005	0.532068	-0.204233	-0.375197	-0.128156	-0.158429	-0.274041	0.0173435	0.998706	0.0872798	0.483079	-0.152729	0.560488	-0.187815
Q9D172	D10JHU81E	Q9D172_D10JHU81E	0.0328061	-0.0203404	-0.0908029	0.0976108	0.077243	-0.150401	-0.0724828	-0.0694519	-0.0679388	-0.0573917	-0.104697	0.00144197	-0.0291463	-0.164884	-0.174621	-0.158429	-0.00433459	0.163499	0.707456	0.679341	0.538974	0.826729	-0.0756847	-0.0636246	-0.0876146
E9QPD7	PCX	E9QPD7_PCX	-0.0335695	-0.0101344	0.0071955	0.0114956	-0.018878	-0.0908029	0.0071955	-0.0679388	-0.0923402	-0.120294	-0.0694519	-0.018878	-0.150401	-0.217591	0.112367	-0.136062	-0.0603973	-0.181149	0.24837	0.693396	0.123354	0.557386	-0.0664693	-0.118825	-0.0967602
Q9DCM2	GSTK1	Q9DCM2_GSTK1	0.0607392	0.0524159	-0.00288828	0.0813396	0.0579701	-0.0232698	-0.0101344	0.0579701	0.0257376	0.0129262	-0.0394883	-0.0603973	-0.0800879	0.0703893	-0.0877334	-0.0724828	-0.0785637	-0.00868224	0.0178364	0.713033	0.101946	0.0101866	-0.03084	-0.0960659	-0.132101
Q9CQN1	TRAP1	Q9CQN1_TRAP1	-0.0320936	0.0114956	-0.0439433	0.00288251	-0.00433459	-0.112475	-0.121863	-0.0816138	-0.0439433	-0.0365259	-0.0409718	-0.128156	-0.0649175	-0.110916	0.0186342	-0.086201	-0.0543923	0.0114956	0.125242	0.159393	0.129812	0.956583	-0.0670083	-0.050312	-0.0068428
P15626	GSTM2	P15626_GSTM2	0.0229004	-0.00723157	0.0100637	-0.100051	-0.0365259	0.0214797	0.0313952	0.045443	0.00575927	-0.0679388	-0.0247367	-0.0365259	0.0071955	-0.0439433	-0.00723157	-0.0380063	0.00144197	-0.0174171	0.246083	0.402774	0.862691	0.998177	0.0200636	-0.037942	-0.0137404
Q9Z1P6	NDUFA7	Q9Z1P6_NDUFA7	-0.0335695	-0.00578235	-0.0528949	0.0271541	0.0299829	-0.104697	-0.0892673	-0.00723157	0.0143553	0	-0.0484122	-0.0394883	0.0257376	-0.0101344	-0.120294	-0.0923402	-0.0877334	-0.277534	0.0164257	0.958704	0.999918	0.018542	0.0124444	0.00954153	-0.0866412
Q9CQ73	PKP2	Q9CQ73_PKP2	0.116365	0.0328061	0.0100637	0.0593553	0.124328	0.0384362	0.045443	-0.0439433	0.0313952	0.100305	0.119024	-0.0247367	0.0200577	0.154454	0.133564	0.0607392	0.109695	0.0867838	0.48034	0.953746	0.919179	0.581465	-0.0076445	0.0542243	0.0521587
Q80X90	FLNB	Q80X90_FLNB	0.0342157	-0.0664274	0.0285692	0.0071955	-0.0174171	0.0482362	0.0662614	-0.0291463	-0.0380063	0.051024	0.0621217	-0.00433459	-0.0144996	-0.0101344	0.115033	0.0271541	0.133564	0.0257376	0.131852	0.996657	0.916993	0.0983292	-0.0352994	-0.0222169	0.0532112
Q8C8R3-2	ANK2	Q8C8R3-2_ANK2	0.0257376	0.00144197	-0.00578235	0.102994	0.15056	0.0214797	0.0676387	0.0426443	0.0271541	0.0881416	0.0186342	-0.0101344	0.00432161	-0.0159576	0.0214797	-0.0101344	0.0690147	0.0579701	0.498323	0.627082	0.936533	0.999019	0.0290545	-0.00926818	0.0261351
Q9JJW5	MYOZ2	Q9JJW5_MYOZ2	0.00144197	0.0129262	-0.0694519	0.0676387	0.138814	-0.0247367	0.0143553	-0.0634092	-0.0262051	0.0551957	0.0398403	-0.0232698	-0.0174171	-0.0350469	-0.107803	-0.0350469	-0.046921	-0.027675	0.362053	0.99856	0.999994	0.36347	-0.0319208	-0.0246012	-0.048168
Q922U2	KRT5	Q922U2_KRT5	-1.82623	-0.265345	0.440421	-1.7084	-1.53952	-0.37707	-0.426625	0.874207	2.29719	-0.16004	-0.177882	0.0935602	-2.32916	0.67717	0.117695	0.978928	-2.33643	-2.23786	0.637121	0.561226	0.91831	0.999977	0.609802	0.826832	-0.07321
E9Q456	TPM1	E9Q456_TPM1	-0.00578235	-0.0247367	-0.109359	-0.0365259	-0.00578235	-0.0892673	-0.0740006	0.0635029	-0.077041	0.0285692	-0.046921	0.187768	0.153157	0.0172093	-0.0380063	0.0731347	0.041243	0.219091	0.0883156	0.99801	0.148554	0.14932	-0.0433693	0.0592005	0.0878201
A0A0N4SVX9	DYSF	A0A0N4SVX9_DYSF	-0.0101344	-0.0306192	0.189034	-0.0409718	0.00288251	-0.0724828	-0.0558912	-0.0558912	0.0384362	-0.0969617	-0.0603973	-0.0573917	-0.123434	0.319618	0.0313952	-0.00433459	-0.0174171	-0.136062	0.879671	0.817948	0.959659	0.817995	-0.0355144	-0.0400205	0.00950096
Q8BMF3	ME3	Q8BMF3_ME3	-0.046921	0.0717627	0.0243197	0.0468403	0.123004	-0.118727	-0.0785637	0.0551957	0.0607392	-0.128156	-0.128156	-0.22095	-0.142417	0.00144197	-0.0954196	-0.161653	-0.195946	-0.0694519	0.0145739	0.980244	0.0341154	0.0355437	0.0196157	-0.163736	-0.164116
P67778	PHB	P67778_PHB	-0.0573917	-0.0247367	-0.086201	0.0172093	0.0949116	-0.0649175	-0.0846703	0.00575927	0.0100637	-0.00578235	0.015783	-0.077041	0.0071955	-0.00433459	-0.0101344	-0.0262051	0.0690147	0.10165	0.365162	0.753314	0.835777	0.203816	0.0468235	0.0367296	0.0705043
P17742	PPIA	P17742_PPIA	-0.0439433	0.0854247	0.0949116	-0.0543923	-0.0664274	0.0214797	-0.0877334	0.163499	0.0285692	-0.0724828	-0.0144996	-0.15682	-0.0203404	-0.0394883	0.119024	0.117695	-0.0320936	-0.0335695	0.290736	0.997037	0.349744	0.96117	0.000739	-0.060229	0.02206
P50462	CSRP3	P50462_CSRP3	0.0635029	0.0551957	0.0200577	0.117695	0.168642	0.123004	0.133564	0.120352	0.0935602	0.120352	0.149259	0.0908534	0.0593553	-0.00868224	-0.16004	0.0662614	-0.0543923	0	0.00830491	0.293704	0.938902	0.0762096	0.0636547	0.0315041	-0.0865454
E9Q6A6	COL6A6	E9Q6A6_COL6A6	0.120352	0.0356239	0.0827026	-0.118727	-0.0203404	0.145351	0.115033	0.0607392	-0.0291463	-0.0908029	0.0881416	-0.204233	-0.0800879	-0.0499049	0.215368	0.0690147	-0.0724828	0.0398403	0.217186	0.967312	0.367192	0.935804	0.00157595	-0.139251	-0.00473575
P08113	HSP90B1	P08113_HSP90B1	0.0607392	-0.0306192	0.0703893	-0.0247367	-0.0365259	0.206643	0.0565835	0.0662614	-0.00868224	0.147958	0.10165	0.045443	0.0962619	-0.0513992	0.0257376	0.0593553	0.0551957	-0.00433459	0.732217	0.758485	0.605115	0.979972	0.0385823	0.0782607	0.0224654
A0A1D5RM59	TNS1	A0A1D5RM59_TNS1	0.0114956	0.0538064	0.0313952	-0.0528949	0.015783	0.0257376	0.0129262	0.0551957	0.0114956	0.0172093	0.0745054	-0.0694519	-0.0262051	-0.018878	0.163499	0.0384362	0.0086303	-0.0159576	0.507122	0.961994	0.942187	0.614877	-0.0056624	-0.0403234	0.00208785
P24527	LTA4H	P24527_LTA4H	0.0621217	-0.011588	0.0908534	-0.0649175	-0.101598	0.0962619	0.0786098	0.0894981	0.0100637	0.0214797	0.0342157	0.015783	0.00144197	-0.0454314	0.0662614	0.077243	0.0922074	-0.00868224	0.647853	0.962826	0.97384	0.714883	0.0533429	-0.00948385	0.0464854
Q8K0D5	GFM1	Q8K0D5_GFM1	-0.0144996	-0.018878	-0.0380063	0.051024	-0.00723157	-0.168123	-0.115597	-0.190997	-0.0785637	0.00575927	-0.0159576	-0.0306192	-0.0908029	-0.15682	-0.161653	-0.200913	-0.093879	-0.0969617	0.0310316	0.0491438	0.444256	0.0200153	-0.0989082	-0.0139304	-0.112619
A0A0R4J038	KNG1	A0A0R4J038_KNG1	0.0342157	0.0172093	0.0384362	-0.131313	-0.226004	0.0496308	0.465713	0.051024	-0.0101344	0.126973	0.246104	0.222805	0.128293	-0.184425	-0.027675	0.158337	-0.0892673	-0.147202	0.64218	0.852378	0.632402	0.998346	0.0239183	0.10258	-0.0841836
Q8JZN5	ACAD9	Q8JZN5_ACAD9	-0.027675	0.00288251	0.00144197	0.0313952	0.0648829	-0.0365259	-0.0320936	0.0426443	0.0827026	-0.00578235	-0.013043	-0.0985055	-0.0573917	0.0635029	-0.0439433	-0.0306192	-0.00723157	0.0524159	0.529101	0.834771	0.800644	0.985663	0.0404821	-0.0152052	-0.0210876
G3X8Q5	CP	G3X8Q5_CP	0.051024	-0.109359	-0.00144342	0.0496308	-0.205896	-0.0649175	0.279768	-0.125006	-0.136062	0.0648829	0.0114956	0.328836	0.0894981	-0.215915	-0.184425	-0.0350469	-0.104697	-0.190997	0.367469	0.93413	0.891232	0.523336	-0.1491	0.0407892	-0.168655
Q9DBL1	ACADSB	Q9DBL1_ACADSB	0.0172093	0.0538064	-0.0218044	0.0621217	0.0100637	-0.0320936	-0.0306192	-0.0740006	0.00432161	0.0356239	0.0243197	-0.0740006	0.0143553	-0.0603973	-0.027675	-0.0558912	-0.00578235	0.0690147	0.391983	0.231698	0.423931	0.601033	-0.066127	-0.0211525	-0.0522365
O70433	FHL2	O70433_FHL2	0.00288251	-0.0923402	0.0949116	0.306845	0.0384362	0.0440443	0.0717627	0.120352	0.200379	0.558757	0.426533	0.414677	0.368489	-0.123434	0	0.197865	0.409255	0.342555	0.167575	0.998005	0.146291	0.488497	0.0228656	0.36578	0.221313
Q61001	LAMA5	Q61001_LAMA5	0.0342157	0.00288251	-0.00868224	-0.0588937	0.0285692	0.113701	0.0328061	-0.018878	-0.0800879	-0.0409718	0.0398403	-0.0785637	-0.0335695	-0.0144996	0.144046	0.0313952	0.0384362	0.0551957	0.112145	0.856951	0.921588	0.160326	0.0314691	-0.0306696	0.0497158
Q9CQB4	UQCRB	Q9CQB4_UQCRB	-0.190997	-0.011588	-0.140826	-0.00868224	0.00144197	-0.22095	-0.229382	-0.0144996	-0.0816138	-0.251539	-0.139236	-0.209228	-0.168123	-0.0785637	-0.123434	-0.136062	-0.253257	-0.140826	0.436644	0.965585	0.376695	0.472624	-0.0054068	-0.091916	-0.062237
F6ZDS4	TPR	F6ZDS4_TPR	-0.0218044	0.0257376	0.0129262	-0.077041	-0.0174171	-0.0499049	-0.0335695	0.077243	-0.00868224	-0.0380063	-0.0144996	-0.110916	-0.0174171	-0.0203404	0.158337	0.0621217	0.0356239	0.0271541	0.0284075	0.986584	0.778705	0.0646978	-0.012978	-0.0159013	0.0533119
Q02788	COL6A2	Q02788_COL6A2	0.102994	-0.0380063	0.077243	-0.0892673	-0.0543923	0.226509	0.123004	0.123004	-0.0174171	0.0370307	0.214125	-0.150401	0.0398403	-0.0350469	0.177599	0.0962619	0.187768	0.0100637	0.478217	0.688129	0.999035	0.412666	0.103386	0.0174124	0.117312
O88569	HNRNPA2B1	O88569_HNRNPA2B1	0.00288251	0.0100637	0.0342157	-0.0484122	0.0243197	-0.0232698	0.0100637	0.0468403	-0.0203404	0.0482362	0.041243	-0.0424568	0.0813396	0.00288251	0.182692	0.0703893	0.0949116	0.0468403	0.0225387	0.985691	0.689536	0.0164293	0.0035906	0.0347699	0.0761773
Q60864	STIP1	Q60864_STIP1	0.0579701	0.00144197	0.0313952	0.0328061	-0.0218044	0.254594	0.115033	0.00144197	0.0186342	0.27739	0.235114	0.265437	0.153157	-0.110916	0.0496308	0.0840643	0.0949116	0.0496308	0.312829	0.875358	0.190495	0.914709	-0.0134664	0.203013	0.0347469
Q9Z2I0	LETM1	Q9Z2I0_LETM1	-0.0484122	-0.0409718	0.0384362	-0.0558912	0.045443	-0.137648	-0.0499049	-0.0365259	0.0648829	-0.0394883	-0.0439433	-0.077041	-0.0619024	0.267835	-0.086201	-0.106249	-0.0159576	-0.136062	0.530579	0.999804	0.890925	0.699666	0.0081661	0.0007487	-0.051533
P35700	PRDX1	P35700_PRDX1	0.0328061	0.0285692	0.0200577	-0.011588	-0.0634092	-0.0232698	-0.0543923	-0.00723157	-0.0174171	0.0935602	0.0342157	-0.00144342	0.00144197	-0.139236	0.0426443	-0.0350469	-0.0262051	0.0071955	0.533542	0.34614	0.886106	0.892872	-0.0475833	-0.0228715	-0.0338183
Q9WVK4	EHD1	Q9WVK4_EHD1	0.0662614	0.0551957	0.0328061	0.0370307	0	0	0.0186342	0.0243197	0.0186342	0.0370307	0.0257376	0.041243	0.0229004	-0.0513992	0.0745054	0.0086303	0.0285692	0.0229004	0.191738	0.142983	0.186214	0.77633	-0.027479	-0.0203756	-0.0203784
P11983	TCP1	P11983_TCP1	0.0243197	0.015783	0.0426443	0.00432161	-0.0350469	0.100305	0.0071955	-0.0159576	0.0129262	0.121679	0.0299829	0.0426443	0.0398403	-0.106249	0.0186342	0.015783	-0.0174171	-0.0218044	0.888569	0.991879	0.99905	0.870384	-0.0128558	0.019789	-0.0208684
P26043	RDX	P26043_RDX	-0.0454314	-0.013043	-0.00723157	-0.07552	-0.0985055	-0.0365259	-0.0969617	0.0243197	-0.0380063	-0.0409718	-0.0203404	-0.125006	-0.0409718	-0.093879	0.0172093	-0.0335695	-0.077041	-0.0923402	0.811721	0.936038	0.653737	0.969287	-0.0087691	-0.0117346	-0.0260681
Q65CL1	CTNNA3	Q65CL1_CTNNA3	0.0229004	0.0243197	-0.0291463	0.041243	0.00288251	-0.14401	-0.12658	-0.0262051	-0.118727	-0.136062	-0.0679388	-0.270556	-0.161653	0.0538064	0.0243197	0.0243197	-0.150401	-0.0724828	0.16481	0.238432	0.0857537	0.640134	-0.142337	-0.159672	-0.0476916
P70404	IDH3G	P70404_IDH3G	0.0214797	0.0214797	0.015783	0.129613	0.102994	-0.120294	-0.0320936	-0.0203404	0.0398403	0.045443	-0.0247367	-0.0558912	-0.0350469	-0.0831412	-0.101598	-0.114035	-0.077041	-0.027675	0.0599046	0.430819	0.171135	0.0247542	-0.0418201	-0.0565266	-0.110799
F6VG99	LMO7	F6VG99_LMO7	0.0440443	0.0426443	-0.0634092	0.0200577	0.0717627	0.0745054	0.0143553	0.0071955	-0.0291463	0.104337	0.0786098	-0.0232698	0.0186342	-0.0528949	0.111031	0.041243	0.0426443	0.0881416	0.410128	0.923729	0.951502	0.266241	-0.0169957	-0.0127168	0.034042
Q8R5L1	C1QBP	Q8R5L1_C1QBP	-0.0320936	0.015783	-0.0709665	0.0313952	0.0786098	-0.0908029	-0.0588937	-0.0816138	-0.00433459	0.0468403	-0.018878	-0.0247367	0.00144197	-0.103147	-0.112475	-0.0724828	-0.0101344	-0.0513992	0.628158	0.933276	0.997186	0.493409	-0.0507384	-0.0107227	-0.0537857
P49813	TMOD1	P49813_TMOD1	0.0496308	0.0440443	-0.0218044	0.045443	0.0635029	-0.00433459	0.00288251	-0.0619024	-0.018878	0.108357	0.0229004	0.0328061	0.0257376	-0.086201	-0.0513992	-0.0499049	-0.0159576	-0.0664274	0.155775	0.610175	0.985743	0.104567	-0.0490782	-0.019006	-0.0953957
Q9WTP7	AK3	Q9WTP7_AK3	0.0086303	0	-0.0291463	0.0648829	0.0426443	-0.00144342	-0.0424568	-0.0174171	0.0129262	-0.00578235	0.0200577	-0.0558912	-0.0694519	-0.07552	-0.0439433	-0.0603973	0.0229004	0.0243197	0.320985	0.934482	0.200322	0.686329	-0.00575857	-0.0602064	-0.0148366
P80314	CCT2	P80314_CCT2	-0.013043	0.0186342	0.0328061	0	-0.0232698	0.0690147	-0.0424568	0.0143553	0.0328061	0.0827026	0.0214797	-0.00288828	-0.00144342	-0.103147	0.00144197	-0.0159576	-0.0454314	-0.0800879	0.49004	0.999997	0.974972	0.415136	0.0050382	-0.0107605	-0.0400116
A2AFQ0	HUWE1	A2AFQ0_HUWE1	-0.0543923	-0.018878	-0.0394883	-0.0454314	-0.0528949	-0.0484122	-0.0846703	-0.0740006	-0.0484122	-0.0664274	-0.0831412	-0.125006	-0.0543923	0.0717627	0.00432161	-0.0484122	-0.0664274	-0.123434	0.908192	0.824481	0.963978	0.893294	-0.0104351	-0.0239676	-0.01496
Q62425	NDUFA4	Q62425_NDUFA4	-0.0174171	-0.0320936	-0.0664274	0.00288251	0.0071955	-0.109359	-0.150401	0.612588	-0.0543923	-0.0424568	-0.0985055	0.151859	0.107018	0.385155	0.0496308	0.424385	-0.121863	0.140124	0.778554	0.875258	0.718834	0.654309	-0.0296369	0.131773	0.119633
Q76MZ3	PPP2R1A	Q76MZ3_PPP2R1A	0.0200577	0.0243197	0.0100637	0.0086303	0.00288251	-0.0484122	-0.0101344	0.0328061	0.00144197	0.00432161	-0.0306192	-0.0380063	-0.018878	-0.0985055	-0.027675	-0.0350469	-0.0101344	-0.00723157	0.0623894	0.550923	0.029031	0.181626	-0.0136187	-0.0456799	-0.0339654
Q9CQR4	ACOT13	Q9CQR4_ACOT13	-0.0218044	-0.00723157	-0.0649175	0.0271541	0.0867838	-0.027675	-0.0365259	0.0114956	0.0214797	0.0328061	0.00288251	-0.0291463	0.00144197	-0.0247367	-0.0724828	-0.00288828	0.0370307	0.0551957	0.802593	0.653193	0.935321	0.827666	0.0260136	0.01596	0.0315892
Q80XN0	BDH1	Q80XN0_BDH1	0.233888	-0.199255	-0.244685	0.112367	0.0607392	0.0745054	0.0370307	-0.761213	-0.356606	-0.0985055	-0.0291463	0.145351	-0.258425	-0.456009	-0.397828	-0.378944	0.264236	-0.169745	0.847386	0.732495	0.880988	0.815069	0.0804747	-0.0550615	-0.2309
P23116	EIF3A	P23116_EIF3A	-0.0232698	0.0299829	-0.00578235	-0.0262051	-0.0424568	-0.0101344	-0.0954196	-0.00144342	-0.00723157	-0.0159576	-0.0306192	-0.0203404	-0.0649175	-0.0634092	0.0370307	-0.011588	-0.00144342	-0.0558912	0.361627	0.530753	0.332034	0.999701	0.00439167	-0.0160931	0.00801037
Q9D0E1	HNRNPM	Q9D0E1_HNRNPM	0	0.0285692	0.0328061	-0.0144996	0.0703893	-0.0203404	0.00575927	0.077243	0.0114956	0.0285692	0.0200577	-0.0291463	0.0635029	-0.00288828	0.186501	0.0285692	0.123004	0.105678	0.0173877	0.878662	0.997471	0.015514	-0.002789	0.0057731	0.100056
P19096	FASN	P19096_FASN	-0.318326	-0.0831412	0.826193	-0.488026	-0.0740006	0.320773	0.970854	0.718088	-0.192645	-0.0985055	0.407081	0.901494	0.24732	-0.380822	2.00468	0.874207	0.657183	-0.388355	0.383044	0.733259	0.906496	0.227542	0.521507	0.448054	0.966429
P32261	SERPINC1	P32261_SERPINC1	-0.00144342	-0.00433459	0.0356239	-0.0543923	-0.298673	-0.176251	0.0854247	-0.121863	-0.112475	-0.189351	-0.0908029	-0.115597	-0.226004	-0.309359	-0.166503	-0.103147	-0.189351	-0.212568	0.0542066	0.173866	0.0284472	0.0643804	-0.118974	-0.186462	-0.175038
A6H644	PPP1R12B	A6H644_PPP1R12B	-0.00723157	-0.011588	-0.0350469	0.0129262	-0.027675	-0.0954196	-0.0558912	-0.077041	-0.0892673	0.0200577	0.0071955	-0.0664274	-0.0603973	-0.125006	-0.0619024	-0.134477	-0.011588	-0.0499049	0.231068	0.145068	0.501828	0.2201	-0.0676312	-0.0509875	-0.0464939
P61982	YWHAG	P61982_YWHAG	-0.00433459	0.0299829	0.0100637	0.0100637	0.0285692	-0.0262051	-0.0543923	-0.0694519	-0.0203404	0.0243197	0.0342157	-0.0543923	0.015783	-0.109359	0.0398403	0.0100637	0.0440443	0.0881416	0.083732	0.377771	0.600516	0.531964	-0.0362688	0.0057193	0.0318786
Q9JK42	PDK2	Q9JK42_PDK2	0.0745054	0.0717627	0.0229004	0.153157	0.219091	-0.0247367	0.115033	0.0840643	0.120352	0.119024	0.0342157	-0.0218044	0.00575927	0.0328061	0.0356239	0.0551957	0.0786098	0.169925	0.43171	0.919727	0.593321	0.999397	0.0418989	-0.040328	-0.0062313
P50396	GDI1	P50396_GDI1	0.0384362	0.0313952	0.0690147	-0.00578235	-0.0439433	0.045443	0.0172093	0.0593553	0.0468403	-0.013043	-0.0101344	-0.0499049	0.00575927	-0.093879	0.041243	0.0496308	0.0114956	0.0114956	0.0394245	0.969048	0.0370268	0.994445	0.0105273	-0.0479587	-0.0085464
Q3TXS7	PSMD1	Q3TXS7_PSMD1	0.0086303	0.0214797	0.0538064	0.00288251	-0.00433459	0.0524159	-0.0218044	-0.0218044	0.045443	0.0257376	0.00144197	-0.0603973	-0.00868224	-0.0232698	0.0257376	0.0200577	0.0071955	-0.0380063	0.422466	0.891572	0.257909	0.74543	-0.0193896	-0.0237372	-0.0014284
D3Z7X0	ACAD12	D3Z7X0_ACAD12	-0.0350469	-0.00723157	-0.0740006	-0.00433459	0.116365	-0.0247367	-0.0335695	0.0786098	0.0799754	0.0551957	0.0908534	0.0271541	0.0676387	0.0690147	-0.0203404	0.0593553	0.111031	0.209141	0.0725189	0.209372	0.0956884	0.0358584	0.099749	0.0887779	0.106332
Q6NZJ6	EIF4G1	Q6NZJ6_EIF4G1	-0.0724828	-0.0335695	-0.0350469	-0.0365259	-0.120294	-0.0740006	-0.190997	-0.109359	-0.107803	-0.0923402	-0.120294	-0.110916	-0.176251	-0.0908029	-0.0877334	-0.107803	-0.142417	-0.15682	0.0128885	0.0128904	0.0159401	0.0141695	-0.0735726	-0.0751296	-0.0893236
P62821	RAB1A	P62821_RAB1A	-0.00144342	-0.0573917	0.104337	-0.114035	-0.212568	0.102994	-0.0484122	-0.0816138	-0.0409718	-0.00723157	0.045443	-0.0923402	-0.046921	0.343692	0.0186342	-0.0439433	-0.0664274	-0.147202	0.510498	0.930223	0.758621	0.923466	-0.0189946	0.022186	-0.0257678
Q02257	JUP	Q02257_JUP	-0.00433459	0.00288251	-0.0588937	-0.0306192	-0.0649175	-0.0709665	-0.07552	-0.0439433	-0.0528949	-0.0785637	-0.00144342	-0.0800879	-0.0380063	-0.0350469	0.0786098	0.0143553	-0.027675	-0.027675	0.0314611	0.220867	0.569727	0.390129	-0.0474406	-0.0205294	0.010817
Q8VCQ8	CALD1	Q8VCQ8_CALD1	-0.0380063	0.126973	0.0854247	-0.210897	-0.199255	0.378512	0.158337	0.341417	0.0935602	0.0854247	0.22404	0.145351	0.293959	-0.0335695	0.390668	0.267835	0.299831	0.0524159	0.232471	0.369633	0.423506	0.113535	0.134628	0.121642	0.260124
P99029	PRDX5	P99029_PRDX5	-0.0144996	0.0200577	-0.0513992	0.0908534	0.0894981	-0.093879	-0.0969617	-0.00723157	0.0186342	-0.0291463	-0.0454314	0.0342157	0.0257376	-0.0499049	-0.0877334	-0.0306192	-0.011588	0.129613	0.923397	0.860582	0.913076	0.990728	-0.0100106	-0.0319253	-0.0238826
A2AVJ7	RRBP1	A2AVJ7_RRBP1	-0.0394883	-0.0365259	0.107018	-0.0603973	-0.14401	0.0962619	0.00144197	0.0962619	-0.0203404	-0.0159576	-0.00144342	-0.112475	-0.00433459	0.00575927	0.051024	-0.0144996	-0.046921	-0.153607	0.826328	0.988404	0.970987	0.875301	0.0394491	0.0336725	0.0072968
Q8CGY6	UNC45B	Q8CGY6_UNC45B	0.0243197	0.0398403	-0.0424568	0.00432161	0.0071955	0.22404	0.0299829	-0.0694519	-0.0232698	0.140124	0.180148	0.113701	0.0607392	-0.0409718	0.0440443	0.0398403	-0.00868224	-0.0159576	0.389669	0.91389	0.290279	0.9974	-0.00712516	0.0993803	0.00125838
Q9WU78	PDCD6IP	Q9WU78_PDCD6IP	0.015783	0.0257376	0.0271541	-0.0232698	-0.086201	0	-0.0831412	0.0328061	-0.0335695	-0.0877334	-0.0513992	-0.0335695	-0.0588937	-0.027675	-0.011588	-0.0350469	-0.0513992	-0.00433459	0.0874804	0.1533	0.0368279	0.314332	-0.0543298	-0.0721595	-0.0440777
A0A0G2JEX1	NEXN	A0A0G2JEX1_NEXN	-0.0424568	0.0635029	0	-0.0101344	-0.0320936	0.0313952	-0.0724828	0.0342157	-0.00433459	0.0524159	0.045443	-0.148801	-0.0484122	-0.0985055	-0.0740006	-0.0247367	-0.027675	0.0129262	0.710571	0.982439	0.583853	0.793132	0.00073261	-0.043345	-0.0211387
Q91VW5	GOLGA4	Q91VW5_GOLGA4	0.015783	-0.0174171	-0.046921	-0.018878	0.0299829	0.0271541	0.0086303	0.00288251	-0.0424568	0.0114956	0.0200577	-0.018878	-0.00868224	-0.0679388	0.015783	0.0186342	0.0593553	0.0799754	0.0500323	0.576691	0.993976	0.0363685	0.0267778	0.00946531	0.0571423
O70373	XIRP1	O70373_XIRP1	0	-0.0424568	-0.0350469	0.00288251	0.0398403	0.108357	-0.011588	-0.0409718	-0.0424568	0.119024	0.112367	0.10165	-0.0291463	-0.077041	0.00144197	0.051024	0.0370307	0.0071955	0.497871	0.814655	0.311774	0.639698	0.00593545	0.119173	0.0396365
O88342	WDR1	O88342_WDR1	0.0621217	-0.0101344	-0.0588937	0.133564	0.0881416	0.0799754	0.0949116	0.0143553	-0.00578235	0.104337	0.0342157	0.0398403	0.0949116	-0.0573917	-0.00144342	0.041243	0.0908534	0.0313952	0.953966	0.893484	0.982875	0.993134	0.0539818	0.0138467	0.0103254
O35452	TNXB	O35452_TNXB	0.0313952	-0.0409718	0.0976108	-0.172994	-0.142417	0.0579701	-0.00578235	0.10165	-0.0528949	-0.0634092	0.0214797	-0.169745	-0.106249	-0.106249	0.153157	0.0621217	0.136191	-0.013043	0.0910619	0.992491	0.594277	0.263516	-0.00099405	-0.101461	0.103945
E9QPX3	NDUFS4	E9QPX3_NDUFS4	-0.0543923	0.0356239	-0.00723157	0.0172093	0.0342157	-0.106249	-0.125006	0.0071955	0.0299829	0.00432161	-0.00723157	-0.107803	-0.0543923	-0.0365259	-0.123434	-0.0831412	-0.121863	-0.320126	0.0296663	0.860986	0.758045	0.0170608	0.00220663	-0.0415148	-0.127637
Q91VM9	PPA2	Q91VM9_PPA2	-0.0306192	0.0593553	-0.0365259	0.116365	0.14274	-0.0664274	-0.0528949	0.0621217	0.0496308	-0.00433459	0.015783	-0.202572	-0.0439433	-0.0247367	-0.0218044	-0.0558912	-0.0558912	0.0551957	0.360647	1	0.32811	0.727854	0.0352628	-0.0391048	-0.0532159
P07356	ANXA2	P07356_ANXA2	0.107018	-0.0320936	0.107018	-0.153607	-0.0144996	0.0551957	0.0854247	0.117695	-0.0588937	0.0482362	0.126973	-0.0159576	0.0271541	-0.0394883	0.172488	0.0840643	0.173767	-0.0320936	0.522674	0.922029	0.964473	0.356943	0.0177335	-0.0103081	0.090814
Q9DBG3-2	AP2B1	Q9DBG3-2_AP2B1	0.0635029	0.0200577	0.0731347	-0.0409718	-0.0484122	0.0551957	0.0356239	0.077243	0.0086303	0.045443	0.0299829	0.00144197	0.041243	-0.0350469	0.0758749	0.0384362	0.0745054	-0.013043	0.831741	0.998926	0.950826	0.927769	-0.0061564	-0.0117974	0.0146905
E9QNT8	ANK1	E9QNT8_ANK1	-0.0409718	-0.0306192	0.0799754	0.0482362	-0.286304	0.541019	0.37629	0.0976108	0.469886	-0.205896	-0.1976	0.658097	0.196607	0.159629	-0.100051	0.227741	-0.104697	-0.22095	0.449068	0.494553	0.884868	0.975488	0.367482	0.15082	-0.111182
P80316	CCT5	P80316_CCT5	-0.0262051	0.0129262	0.0143553	-0.0499049	-0.0785637	0.0922074	-0.0424568	0.0186342	0.0214797	0.0731347	0.0243197	0.0200577	0.0086303	-0.0908029	0.0440443	0.0299829	-0.077041	-0.100051	0.847587	0.967292	0.929243	0.976484	0.0252736	0.0266971	-0.0168896
O08553	DPYSL2	O08553_DPYSL2	0.0813396	-0.0588937	0.15056	-0.114035	-0.0724828	0.0398403	0.0786098	0.0976108	-0.0439433	0.00288251	0.0607392	-0.0350469	0.0086303	-0.0892673	0.0881416	0.0635029	0.0949116	-0.00723157	0.626604	0.999242	0.929142	0.750561	0.0286173	-0.00834044	0.0645993
Q8CIB5	FERMT2	Q8CIB5_FERMT2	0	0.0607392	0.041243	-0.0380063	-0.0174171	0.0662614	0.0635029	0.0607392	0.0398403	0.0482362	0.108357	-0.0365259	-0.00144342	0.0398403	0.183963	0.0607392	0.0840643	-0.0174171	0.465551	0.811915	0.949432	0.300632	0.0401177	0.0192188	0.0517802
Q8VDM4	PSMD2	Q8VDM4_PSMD2	0.0342157	0.015783	0.0243197	0.0243197	-0.0350469	0.0100637	-0.0350469	-0.00144342	-0.00578235	0.0370307	-0.0159576	-0.0409718	-0.0499049	-0.0969617	-0.0159576	-0.0454314	-0.0439433	-0.0740006	0.0288454	0.194339	0.0341478	0.0164416	-0.030102	-0.0652915	-0.0690071
A0A0N4SVK8	ADPRHL1	A0A0N4SVK8_ADPRHL1	-0.027675	-0.0892673	-0.0573917	-0.00868224	0.051024	-0.0203404	0.0100637	-0.0320936	-0.0424568	0.0496308	0.00288251	-0.00723157	-0.0335695	-0.0159576	-0.152003	-0.0846703	0.0071955	-0.0664274	0.0794669	0.414934	0.311331	0.678523	0.0221929	0.0353018	-0.0330155
P62141	PPP1CB	P62141_PPP1CB	0.0328061	0.0129262	-0.011588	0.0229004	0.0426443	-0.0543923	-0.0144996	-0.0232698	-0.00578235	0.045443	0.0229004	0.0257376	0.0285692	-0.0218044	0.0731347	-0.013043	0.0717627	0.0342157	0.134152	0.48936	0.98305	0.473793	-0.0324129	0.0078243	0.0350759
A0A0R4J0Z1	PDIA4	A0A0R4J0Z1_PDIA4	0.045443	-0.0159576	0.163499	-0.0800879	-0.110916	0.233888	0.0551957	0.0922074	-0.011588	0.0285692	0.0976108	0.0579701	0.0440443	-0.0877334	0.0731347	0.113701	0.130931	-0.00144342	0.844917	0.964812	1	0.786818	0.040453	0.0293016	0.0786751
E9Q1U2	SYNPO2	E9Q1U2_SYNPO2	0.0299829	0.0143553	0.00575927	0.0172093	-0.0679388	-0.0247367	-0.0709665	-0.077041	-0.0439433	0.0257376	0.0243197	-0.0262051	-0.139236	-0.0634092	0.0071955	-0.0969617	-0.0291463	-0.142417	0.126579	0.10613	0.298988	0.0844652	-0.0837211	-0.0419874	-0.0788363
P27546-2	MAP4	P27546-2_MAP4	0.0328061	-0.0439433	0.0086303	0.0538064	-0.0203404	-0.0350469	-0.0892673	-0.0831412	-0.0923402	0.0100637	0.0100637	-0.176251	-0.132894	-0.121863	-0.0892673	-0.0291463	-0.0664274	-0.103147	0.0964696	0.135715	0.0562046	0.114287	-0.103859	-0.142581	-0.0985656
P62827	RAN	P62827_RAN	0.0071955	-0.0588937	-0.0306192	-0.00723157	0.0114956	0.0426443	0.0257376	0.0129262	0.051024	0.0621217	0.0496308	0.0894981	0.0962619	-0.0543923	-0.0203404	0.0100637	0.0243197	-0.0800879	0.0657041	0.20871	0.0611684	0.994101	0.044663	0.0810471	0.013787
Q9QYG0	NDRG2	Q9QYG0_NDRG2	-0.0619024	0.0143553	-0.0892673	0.00288251	-0.0424568	-0.093879	-0.152003	-0.0320936	-0.0247367	-0.0101344	-0.0499049	-0.0954196	-0.077041	-0.0664274	-0.0831412	-0.0573917	-0.129734	-0.0439433	0.525521	0.501995	0.703673	0.364724	-0.0129469	-0.0369175	-0.0407565
Q9JHW2	NIT2	Q9JHW2_NIT2	0.00432161	0.00144197	-0.0831412	0.0799754	0.0579701	-0.0306192	0.00575927	-0.0573917	0.0200577	0.124328	0.0786098	0.0271541	0.0186342	-0.0619024	-0.100051	-0.0573917	0.0186342	0.0299829	0.486946	0.999961	0.697519	0.851246	0.00287748	0.0242723	-0.0222605
Q8VCT4	CES1D	Q8VCT4_CES1D	-0.186065	0.00144197	0.215368	-0.260152	-0.741783	-0.438307	-0.405451	-0.137648	-0.28279	-0.522841	-0.415038	-0.496142	-0.58208	-0.305788	-0.112475	-0.177882	-0.701342	-0.550043	0.0582804	0.0719597	0.0312944	0.108635	-0.313139	-0.40383	-0.271651
Q9QUR6	PREP	Q9QUR6_PREP	-0.0394883	-0.0484122	0.00144197	0.0356239	-0.0409718	-0.104697	-0.0816138	-0.0484122	0.0086303	-0.0558912	-0.163268	-0.0892673	-0.125006	-0.0380063	-0.117161	-0.136062	-0.086201	-0.0908029	0.0210953	0.350591	0.0271798	0.0153077	-0.029389	-0.0702441	-0.0849588
Q8BX70	VPS13C	Q8BX70_VPS13C	0.00288251	0.0257376	0.0229004	-0.0588937	-0.148801	0.0114956	-0.0573917	-0.0740006	-0.0394883	-0.0528949	-0.0101344	-0.0454314	-0.0679388	-0.0740006	0.116365	-0.0101344	-0.0558912	-0.101598	0.385069	0.317267	0.475711	0.98572	-0.0702832	-0.0657864	-0.0459043
Q3UKW2	CALM1	Q3UKW2_CALM1	0.0370307	0.00432161	0.10165	-0.0484122	-0.0484122	0.0482362	0.0086303	0.0370307	0.0426443	0.0186342	0.0496308	-0.013043	0.0114956	-0.0985055	0.0538064	0.051024	0.0440443	-0.0101344	0.640081	0.995208	0.684357	0.976406	0.0163545	-0.00918055	0.026858
Q9CPY7	LAP3	Q9CPY7_LAP3	0.0200577	-0.0573917	-0.0846703	0.0840643	0.0299829	-0.152003	-0.0513992	-0.0908029	-0.0877334	-0.0159576	-0.0846703	-0.114035	-0.0877334	-0.168123	-0.131313	-0.114035	-0.011588	0.0398403	0.363063	0.436255	0.206068	0.686166	-0.0690664	-0.0690664	-0.0441445
P06684	C5	P06684_C5	0.0745054	0.0200577	-0.0969617	-0.0424568	-0.172994	0.121679	0.546956	-0.0785637	0.0328061	0.414677	0.302173	0.50284	0.202888	-0.0484122	-0.205896	-0.0892673	-0.132894	-0.261881	0.0262013	0.77206	0.107503	0.514091	0.0440057	0.313373	-0.158195
Q3U4W8	USP5	Q3U4W8_USP5	-0.0144996	-0.0144996	-0.0291463	0.0440443	-0.0291463	-0.018878	-0.027675	-0.0306192	-0.00144342	0.0114956	-0.0724828	-0.0424568	-0.0543923	-0.16004	-0.0380063	-0.0424568	-0.0232698	-0.0724828	0.146029	0.818481	0.0841815	0.336086	-0.0131754	-0.0398927	-0.025732
Q9CR62	SLC25A11	Q9CR62_SLC25A11	0.0214797	0.0648829	0.0143553	0.0370307	0.136191	0.0370307	0.0100637	0.202888	0.126973	0.0186342	0.0786098	-0.0101344	0.041243	0.423309	0.0976108	0.0935602	0.0976108	0.169925	0.673992	0.653468	0.582206	0.580178	0.0977178	0.0119878	0.0683556
Q8K411	PITRM1	Q8K411_PITRM1	0.0114956	0.0100637	-0.00723157	0.0524159	0.0976108	-0.100051	-0.027675	0.0172093	0.0114956	-0.00144342	-0.0409718	-0.147202	-0.0816138	-0.013043	-0.0846703	-0.131313	-0.00868224	0.051024	0.298704	0.955982	0.235683	0.41623	0.00071595	-0.0517515	-0.0574559
A0A0R4J275	NDUFA12	A0A0R4J275_NDUFA12	-0.00868224	0.0786098	-0.00433459	0.051024	0.0989585	-0.0846703	-0.0499049	0.045443	0.0426443	-0.0203404	-0.0424568	0.00575927	0.0100637	-0.013043	0.0579701	-0.00723157	0.0271541	-0.140826	0.696418	0.938612	0.629512	0.606816	0.0192996	-0.0363877	-0.0133834
Q9WVA4	TAGLN2	Q9WVA4_TAGLN2	0.00144197	0.0799754	0.228973	-0.261881	-0.248108	0.453122	0.269033	0.488515	0.189034	0.137504	0.260628	0.27858	0.39835	0.0621217	0.390668	0.370722	0.408168	0.041243	0.28221	0.321122	0.330419	0.170832	0.228324	0.219919	0.339986
P18760	CFL1	P18760_CFL1	-0.00578235	-0.0513992	0.0690147	-0.0306192	-0.0573917	0.24123	0.0551957	0.214125	0.0867838	0.0894981	0.0468403	0.100305	0.298658	-0.0603973	0.0257376	0.226509	0.24123	0.126973	0.249297	0.313607	0.403097	0.133178	0.104985	0.107699	0.194942
Q78PY7	SND1	Q78PY7_SND1	-0.0679388	0.00575927	0.0676387	-0.0877334	-0.0785637	0.0813396	-0.0513992	0.120352	-0.0174171	-0.0619024	-0.0528949	-0.0320936	-0.0320936	-0.104697	0.0229004	0.0114956	-0.0350469	-0.077041	0.431157	0.789463	0.717989	0.999986	0.0136727	-0.0218051	0.0193141
P35564	CANX	P35564_CANX	-0.013043	-0.15682	0.119024	0.0114956	0.0086303	0.104337	0.0593553	-0.140826	-0.0528949	0.0976108	0.113701	-0.00144342	-0.018878	0.334568	0.104337	0.0229004	0.0731347	0.0143553	0.343054	0.999631	0.288003	0.733456	0.009404	0.0983845	0.0487913
Q9WTQ5	AKAP12	Q9WTQ5_AKAP12	0.0071955	-0.0218044	0.10165	-0.0649175	-0.07552	0.0172093	-0.0306192	-0.0394883	-0.139236	-0.0816138	0.0370307	-0.251539	-0.132894	-0.148801	0.123004	0.0071955	0.0935602	0.0384362	0.0185008	0.525718	0.0786556	0.55213	-0.0321838	-0.12559	0.0733026
P80313	CCT7	P80313_CCT7	0	0.0271541	0.0496308	0.00432161	-0.0320936	0.117695	-0.0203404	0.015783	0.0129262	0.0881416	0.0186342	0.00575927	-0.00578235	-0.125006	0.0356239	0.0214797	-0.011588	-0.027675	0.889296	0.999947	0.846043	0.952969	-0.00281166	-0.00997859	-0.010792
P62962	PFN1	P62962_PFN1	0.0100637	0.0200577	-0.00144342	0.00575927	0.0328061	0.190299	0.0524159	0.144046	0.113701	0.0468403	0.00575927	0.0908534	0.186501	-0.0203404	-0.00578235	0.147958	0.171207	0.0949116	0.165368	0.108954	0.503449	0.155834	0.10579	0.0389288	0.113523
Q9CQJ8	NDUFB9	Q9CQJ8_NDUFB9	-0.0454314	-0.011588	-0.0649175	0.0468403	0.0524159	-0.103147	-0.046921	-0.0335695	0.00144197	-0.0409718	-0.0740006	-0.0365259	0.015783	-0.0306192	-0.0558912	-0.128156	-0.0320936	-0.172994	0.159441	0.993135	0.950092	0.11711	-0.0050598	-0.0080162	-0.0635139
P28650	ADSSL1	P28650_ADSSL1	-0.0291463	0.0989585	-0.0320936	-0.0247367	-0.0306192	-0.0380063	-0.0877334	-0.0203404	0	-0.00288828	0.0214797	-0.120294	-0.086201	-0.018878	-0.00578235	-0.0439433	-0.0174171	0.0172093	0.510502	0.504049	0.396103	0.935418	-0.0036777	0.0080635	0.0153418
Q9WUM5	SUCLG1	Q9WUM5_SUCLG1	-0.011588	-0.0159576	-0.0528949	0.0299829	0.0313952	-0.046921	-0.123434	0.293959	0.0703893	-0.0424568	-0.0709665	0.0854247	0.0662614	0.138814	-0.0831412	0.15056	-0.0679388	0.181421	0.875073	0.800353	0.869387	0.82169	0.045168	0.0800342	0.0550834
Q91VR5	DDX1	Q91VR5_DDX1	-0.0159576	-0.0218044	-0.00144342	-0.0394883	0.00432161	-0.0159576	-0.0394883	-0.0144996	-0.027675	0.0071955	0.0271541	-0.0409718	-0.0232698	-0.0954196	0.0468403	0.015783	0.0313952	-0.00288828	0.115406	0.999892	0.984852	0.142002	0.0029234	-0.0043888	0.0424701
P42227	STAT3	P42227_STAT3	-1.75633	-0.00578235	0.0648829	-0.244685	0.134878	0.146655	-0.304006	0.0398403	0.0200577	-0.0454314	0.0813396	-0.207561	-0.106249	0.0398403	0.0922074	0.104337	-0.231075	-1.0145	0.438058	0.318536	0.405179	0.842989	0.165074	0.0798023	0.0557999
P62192	PSMC1	P62192_PSMC1	0.0538064	-0.027675	0.0524159	0.0214797	0.0356239	0.124328	0.0635029	0.0100637	0.0328061	0.077243	0.0607392	-0.0144996	0.015783	0.305679	0.0922074	0.0565835	0.0786098	-0.00288828	0.667654	0.896984	0.468087	0.885321	-0.0013239	0.0237914	0.0306488
Q3U1J4	DDB1	Q3U1J4_DDB1	0.00575927	0.041243	0.0468403	-0.00578235	-0.0247367	-0.0543923	-0.0634092	0.0129262	0.0398403	-0.0247367	-0.0247367	-0.163268	-0.0846703	-0.0969617	0.0676387	0.0214797	-0.0291463	-0.0144996	0.0191187	0.430209	0.0128764	0.973423	-0.0482378	-0.108171	-0.0200111
P13020	GSN	P13020_GSN	0.0229004	0.00432161	0.16221	-0.0543923	-0.0649175	0.214125	0.199123	0.215368	0.119024	-0.0454314	0.0426443	0.0593553	0.117695	-0.161653	-0.0101344	0.121679	0.0662614	-0.0985055	0.237062	0.360253	0.943009	0.99501	0.185512	0.0290333	0.0144525
Q9WVE8	PACSIN2	Q9WVE8_PACSIN2	-0.0709665	-0.0218044	-0.0634092	0.0271541	-0.013043	-0.086201	-0.123434	-0.0831412	-0.0573917	-0.0365259	-0.0424568	-0.0877334	-0.123434	-0.137648	-0.104697	-0.0969617	-0.101598	-0.106249	0.112553	0.31222	0.141415	0.0572623	-0.0405344	-0.0451266	-0.0605407
E9PV24	FGA	E9PV24_FGA	-0.128156	0.199123	-0.0513992	0.0524159	-0.163268	0.813114	0.609755	0.587845	0.200379	0.360645	0.116365	0.998557	0.939603	0.176323	-0.163268	0.264236	0.215368	0.0482362	0.105801	0.214942	0.0919342	0.976774	0.587337	0.360137	0.131294
Q9CPV4	GLOD4	Q9CPV4_GLOD4	-0.00144342	-0.0101344	-0.0409718	-0.0174171	-0.0291463	-0.0365259	-0.0740006	-0.0664274	-0.0335695	-0.018878	0.015783	-0.123434	-0.0543923	-0.131313	-0.00288828	-0.0174171	-0.0159576	0.0172093	0.130544	0.496621	0.218422	0.929128	-0.0227502	-0.0406166	0.00435281
E9Q4Z2	ACACB	E9Q4Z2_ACACB	-0.00723157	0.051024	0.0172093	-0.00723157	0.0299829	-0.0424568	-0.00868224	-0.0424568	0.0186342	-0.0409718	-0.0513992	-0.0634092	-0.093879	0.015783	0.115033	0.00288251	-0.0159576	-0.0365259	0.156842	0.782172	0.140779	0.999344	-0.0136711	-0.0563881	-0.0115264
Q99MR9	PPP1R3A	Q99MR9_PPP1R3A	-0.0144996	-0.0785637	0.0717627	-0.0218044	-0.0573917	0.0200577	0.00144197	-0.0954196	-0.0603973	0.041243	0.0648829	-0.0785637	-0.100051	0.227741	-0.00868224	-0.132894	-0.100051	-0.0954196	0.259971	0.923884	0.792686	0.474369	-0.0392397	0.059395	-0.0795833
P80318	CCT3	P80318_CCT3	0.045443	0.0299829	0.0328061	0.0285692	0.0086303	0.0621217	0.0114956	0.0565835	-0.00433459	0.104337	0.0086303	0.0243197	0.0243197	0.045443	0.0243197	-0.00723157	0.0071955	-0.027675	0.184181	0.958862	0.960314	0.220186	-0.0198989	-0.0070748	-0.0314125
A2AMM0	CAVIN4	A2AMM0_CAVIN4	0.0356239	-0.013043	-0.100051	0.133564	0.0648829	-0.0785637	-0.0785637	-0.131313	-0.0484122	0.100305	0.0607392	0.0114956	0.051024	-0.0908029	-0.0831412	-0.0664274	0	0.0579701	0.386303	0.428461	0.989308	0.833266	-0.0898541	0.0397335	-0.0445041
Q9D0I9	RARS	Q9D0I9_RARS	0.0214797	-0.0528949	0.0257376	0.00144197	-0.0232698	0.00288251	-0.013043	-0.0558912	-0.0291463	0.0200577	-0.00433459	0.0426443	-0.0174171	0.00575927	-0.0335695	-0.0603973	-0.0306192	-0.0985055	0.0195292	0.494007	0.895867	0.0376179	-0.0347306	-0.00570157	-0.0584442
P60843	EIF4A1	P60843_EIF4A1	0.0200577	0.00575927	0.045443	0.0200577	-0.00868224	0.0271541	-0.00578235	-0.0365259	-0.0159576	0.0621217	-0.0232698	0.0342157	-0.0588937	-0.110916	-0.00144342	-0.00433459	-0.0144996	-0.0424568	0.4579	0.548358	0.316521	0.42211	-0.0287399	-0.0433275	-0.0294748
Q8VEK3	HNRNPU	Q8VEK3_HNRNPU	-0.0159576	-0.0380063	0.0214797	-0.00868224	0.0200577	-0.0218044	-0.0101344	0.0468403	-0.0454314	0.0229004	0.00575927	-0.0649175	0.0271541	0.0384362	0.105678	0.0482362	0.0243197	0.0071955	0.182386	0.974319	0.848981	0.116504	0.00218552	0.0352203	0.0485979
P07901	HSP90AA1	P07901_HSP90AA1	0.0935602	-0.0424568	0.0717627	-0.0203404	0.0827026	0.478195	0.297485	0.0989585	0.0468403	0.343692	0.365133	0.455229	0.291604	-0.00578235	0.173767	0.286881	0.305679	0.214125	0.0780695	0.198583	0.0372065	0.110192	0.0732474	0.317981	0.224792
Q9WTP6	AK2	Q9WTP6_AK2	0.0143553	-0.00433459	0	0.100305	0.0129262	-0.110916	-0.0800879	-0.131313	-0.0101344	-0.00868224	-0.0831412	-0.0439433	-0.0439433	-0.15682	-0.0619024	-0.12658	-0.0709665	-0.0877334	0.0324714	0.0510881	0.0426315	0.0204908	-0.0872655	-0.0511209	-0.0865276
Q7TSQ8	PDPR	Q7TSQ8_PDPR	0.0100637	-0.0101344	-0.00868224	-0.0159576	0.0356239	-0.192645	-0.0619024	-0.00144342	0.0342157	-0.0969617	-0.129734	-0.212568	-0.152003	-0.013043	-0.0409718	-0.0484122	-0.0320936	0.0949116	0.0902524	0.850759	0.0778764	0.999999	0.0079649	-0.120326	-0.0271244
Q3UH59	MYH10	Q3UH59_MYH10	0.0114956	0.0114956	0.173767	-0.222633	-0.184425	0.172488	0.195348	0.177599	-0.0218044	0.0342157	0.183963	0.0690147	0.0313952	0.0440443	0.378512	0.0989585	0.402722	-0.0634092	0.345953	0.824183	0.798549	0.191784	0.160992	0.0325487	0.22724
Q9EQP2	EHD4	Q9EQP2_EHD4	0.0086303	-0.0203404	0.151859	-0.101598	0.0071955	0.215368	0.0468403	0.211635	0.0962619	0.14274	0.137504	0.253384	0.167358	0.121679	0.0813396	0.263034	0.145351	0.0271541	0.113596	0.221994	0.0527117	0.18032	0.102117	0.148595	0.1192
O55111	DSG2	O55111_DSG2	0.0186342	-0.0262051	0.129613	-0.117161	-0.0232698	0.0976108	0.0496308	-0.0394883	0.0579701	0.0648829	0.182692	0.107018	0.0356239	0.393965	0.255803	0.126973	0.175045	0.0717627	0.0717937	0.95619	0.093968	0.114116	0.0534162	0.110803	0.154794
P01029	C4B	P01029_C4B	-0.011588	-0.0365259	-0.0709665	0.15056	-0.0558912	-0.086201	0.253384	-0.0694519	-0.0785637	0.157044	0.14274	0.333424	-0.0174171	-0.100051	-0.224317	-0.242977	-0.284546	-0.434403	0.00425095	0.996291	0.592838	0.0168552	-0.0453949	0.166797	-0.239705
P70398	USP9X	P70398_USP9X	0.015783	-0.0232698	-0.0218044	-0.00868224	-0.0785637	-0.0203404	-0.013043	-0.0484122	-0.0247367	-0.0380063	-0.0306192	-0.07552	-0.0484122	0.00288251	0.0186342	-0.00288828	0.0071955	-0.013043	0.0513693	0.226189	0.205634	0.804569	-0.00949338	-0.022763	0.0173969
Q61646	HP	Q61646_HP	0.22404	0.0922074	-0.905088	0.109695	-0.535332	-0.438307	0.689746	-2	-0.771027	1.09694	0.345964	1.24245	0.908429	-1.38082	-2.64386	-2.85726	-1.37333	-1.39593	0.00626674	0.741891	0.663792	0.0198871	-0.636283	0.807478	-2.12085
P97493	TXN2	P97493_TXN2	-0.093879	0.0398403	-0.0262051	-0.018878	0.0635029	-0.0558912	-0.103147	-0.00723157	0.0271541	-0.0320936	0	-0.0649175	-0.00578235	-0.0350469	-0.00578235	0.0129262	-0.0484122	0.0114956	0.918835	0.97951	0.999467	0.91338	0.01531	-0.00955205	0.0253982
P10649	GSTM1	P10649_GSTM1	-0.013043	0.0496308	0.0745054	-0.120294	0.0440443	0.0271541	0.0271541	0.0854247	0.051024	0.015783	0.0758749	0.015783	0.0579701	0.0299829	0.16092	0.0786098	0.077243	0.128293	0.0354995	0.325449	0.454115	0.0131426	0.0257504	0.011689	0.0851575
Q9DC70	NDUFS7	Q9DC70_NDUFS7	0.173767	0.0271541	-0.0831412	0.259423	0.326537	-0.0969617	0.149259	0.0086303	0.0342157	0.16221	-0.0709665	0.112367	0.00144197	0.108357	-0.0954196	-0.07552	0.235114	0.00432161	0.865048	0.999072	0.973083	0.774621	-0.0662448	0.00789645	-0.13606
Q63918	CAVIN2	Q63918_CAVIN2	0.0214797	-0.0144996	0.0854247	-0.0679388	-0.0291463	0.0579701	0.0342157	0.144046	0.0186342	0.0745054	0.0962619	0.0285692	0.0881416	-0.0203404	0.0426443	0.115033	0.113701	0.077243	0.260814	0.585038	0.44506	0.128477	0.0307257	0.0710154	0.091982
P45591	CFL2	P45591_CFL2	0.00144197	0.0313952	-0.0424568	0.0143553	0.0285692	0.0482362	-0.0454314	-0.0694519	-0.00144342	0.0398403	0.0745054	-0.00433459	-0.00578235	-0.0394883	-0.0649175	-0.0588937	-0.0262051	0.0524159	0.674149	0.980866	0.960741	0.764379	-0.00934205	-0.0122332	-0.050448
P70296	PEBP1	P70296_PEBP1	0.0758749	-0.07552	-0.103147	0.117695	0.0285692	-0.128156	-0.018878	-0.101598	-0.112475	0.041243	-0.0439433	-0.0649175	-0.0603973	-0.142417	-0.192645	-0.164884	-0.0439433	-0.00288828	0.379557	0.463649	0.603548	0.217063	-0.101775	-0.0605747	-0.104591
A0A0R4J0Q5	LMNB2	A0A0R4J0Q5_LMNB2	-0.00723157	0.0100637	0.0186342	-0.115597	-0.0558912	-0.0634092	-0.013043	0.0285692	-0.0558912	-0.0320936	-0.00868224	-0.0785637	0.0143553	-0.0694519	0.0989585	0.0565835	0.0758749	0.00432161	0.028317	0.984365	0.963609	0.0551428	-0.0573073	-0.0335097	0.0648131
Q8BZF8	PGM5	Q8BZF8_PGM5	0.00432161	0.0172093	0.0342157	-0.158429	-0.104697	0.105678	0.0607392	0.0881416	0.0662614	0.0328061	0.14274	0.041243	0.0143553	0.0285692	0.115033	0.0648829	0.138814	0.0440443	0.174033	0.352095	0.26772	0.0829862	0.0554959	0.0220406	0.0791925
Q9D8N0	EEF1G	Q9D8N0_EEF1G	0.00575927	-0.0619024	0.0071955	-0.0144996	-0.077041	0.00575927	-0.0543923	-0.0573917	-0.0619024	0.0551957	-0.0101344	0.0949116	-0.027675	-0.0694519	-0.0513992	-0.0785637	0.00288251	-0.123434	0.157033	0.615051	0.788602	0.403665	-0.0530215	-0.00576423	-0.0606113
A0A1Y7VMN0	ROCK2	A0A1Y7VMN0_ROCK2	0.0328061	-0.0892673	-0.027675	-0.046921	-0.140826	-0.0380063	-0.0439433	-0.0394883	-0.134477	-0.027675	-0.0985055	-0.0454314	-0.077041	-0.0985055	-0.011588	-0.0144996	-0.046921	-0.137648	0.532606	0.374674	0.551405	0.886525	-0.0066453	-0.039743	0.0065877
P09528	FTH1	P09528_FTH1	-0.0291463	0.0731347	0.196607	-0.0709665	0.183963	-0.237864	0.0690147	-0.390245	-0.234465	-0.641604	-0.101598	-0.265345	-0.187707	-0.104697	-0.013043	0.0935602	-0.169745	0.0143553	0.134539	0.44727	0.0790776	0.937925	-0.256459	-0.209701	-0.021338
P47757-4	CAPZB	P47757-4_CAPZB	0.045443	0.0384362	-0.027675	0.0593553	0.0662614	0.00432161	0.0143553	0.0114956	0.00144197	0.130931	0.0551957	0.100305	0.100305	-0.07552	-0.0101344	0.0071955	0.0676387	0.077243	0.634048	0.986625	0.670584	0.995808	-0.030444	0.0583654	-0.0045225
P54775	PSMC4	P54775_PSMC4	-0.0203404	-0.027675	-0.011588	0.0129262	0.0538064	-0.00578235	-0.0306192	-0.0291463	-0.0247367	0.0468403	-0.027675	-0.0159576	-0.00578235	-0.147202	-0.046921	-0.0634092	-0.0159576	-0.00868224	0.766961	0.997616	0.871451	0.823393	-0.0087725	6.6e-06	-0.0154751
Q9CZW5	TOMM70	Q9CZW5_TOMM70	-0.0101344	0.00144197	0.0962619	-0.0664274	0.0299829	0.172488	0.0662614	-0.0484122	0.134878	0.0949116	0.219091	0.0607392	0.0989585	0.372952	0.214125	0.134878	0.207893	0.102994	0.0583342	0.586523	0.0470403	0.0687772	0.0706076	0.103305	0.175732
E9PWE8	DPYSL3	E9PWE8_DPYSL3	0.121679	-0.0877334	0.197865	-0.22095	-0.131313	0.129613	0.146655	0.227741	-0.0558912	0.0172093	0.105678	-0.0439433	0.0271541	-0.0528949	0.232661	0.172488	0.227741	0.0524159	0.266209	0.823174	0.99941	0.201788	0.11264	0.0002365	0.183142
Q9D020	NT5C3A	Q9D020_NT5C3A	0.0172093	0.00144197	-0.0394883	0.051024	0.0579701	0.0271541	0.0129262	-0.00723157	0.0243197	0.0676387	0.00432161	-0.0454314	0.0129262	-0.0380063	0.0731347	0.0538064	0.0786098	0.129613	0.0178516	0.84988	0.979647	0.0235865	0.0149941	-0.00500403	0.0665466
Q9QYJ0	DNAJA2	Q9QYJ0_DNAJA2	-0.0350469	-0.0350469	-0.046921	0.0313952	-0.00433459	-0.0424568	-0.0262051	-0.0454314	-0.0439433	0.00144197	-0.0232698	0.0172093	-0.0409718	-0.107803	-0.123434	-0.0816138	-0.0203404	-0.086201	0.187102	0.943765	0.965266	0.124108	-0.0074099	0.0117771	-0.0488605
P42230	STAT5A	P42230_STAT5A	-0.0291463	-0.018878	0.0717627	-0.046921	-0.00144342	-0.0846703	-0.00868224	0.0579701	0.00575927	-0.0543923	-0.163268	0.0342157	-0.0634092	-0.0101344	-0.0800879	-0.086201	-0.100051	-0.169745	0.0626389	0.999999	0.505227	0.0563408	0.0225687	-0.0303801	-0.0691139
Q9WUR2	ECI2	Q9WUR2_ECI2	-0.0306192	0.0086303	-0.0954196	0.0551957	-0.011588	-0.169745	-0.142417	-0.086201	-0.0603973	-0.0588937	-0.0985055	-0.14401	-0.0954196	-0.145605	-0.0877334	-0.0985055	-0.0877334	-0.00433459	0.0959913	0.10643	0.0504918	0.363161	-0.0752065	-0.087511	-0.076739
Q64737	GART	Q64737_GART	0.00432161	0.00575927	-0.0306192	0.0468403	-0.00144342	-0.027675	-0.018878	-0.0247367	-0.018878	0.132248	0.0257376	-0.00868224	0.0143553	-0.0969617	-0.0365259	-0.00433459	0.0143553	0.0538064	0.763241	0.791441	0.993583	1	-0.0239184	0.00931486	-3.0085e-05
P09405	NCL	P09405_NCL	-0.0232698	-0.00723157	0.0214797	-0.0513992	0.0086303	-0.0664274	-0.0923402	0.051024	-0.0892673	-0.0740006	-0.0679388	-0.189351	-0.101598	0.0538064	0.0524159	-0.0394883	-0.0262051	-0.027675	0.403488	0.904259	0.361588	0.998952	-0.0511767	-0.0587499	-0.0116894
Q8K1M3	PRKAR2A	Q8K1M3_PRKAR2A	0.00288251	0.015783	-0.0454314	-0.027675	-0.00433459	-0.0664274	-0.0985055	-0.0649175	-0.0232698	-0.00578235	-0.0380063	-0.0816138	-0.011588	-0.121863	-0.00723157	-0.0985055	-0.0439433	0.0172093	0.516556	0.423438	0.417802	0.848096	-0.0525213	-0.0256101	-0.0131912
Q6ZQ38	CAND1	Q6ZQ38_CAND1	0	-0.0394883	0.0989585	-0.0380063	-0.118727	0.045443	0.0243197	0.0482362	0.0356239	-0.0649175	-0.0262051	0.0426443	-0.0262051	-0.0291463	0.0243197	0.0662614	-0.00723157	-0.106249	0.894045	0.999955	0.863076	0.988197	0.054627	-0.00720195	0.0275472
Q99KR7	PPIF	Q99KR7_PPIF	-0.0664274	-0.0159576	-0.0603973	0.0186342	0.0200577	-0.158429	-0.121863	0.00432161	0.0342157	-0.027675	-0.0543923	-0.106249	-0.0484122	-0.0101344	-0.0923402	-0.0439433	-0.0679388	0.0648829	0.970267	0.977575	0.945833	0.999516	0.0424991	-0.0102348	-0.0177636
Q9ERS2	NDUFA13	Q9ERS2_NDUFA13	-0.046921	0.0313952	0.041243	-0.0247367	0.0648829	0.0524159	0.045443	0.0243197	0.155749	0.0299829	0.0593553	0.0440443	0.119024	0.441483	0.134878	0.0908534	0.133564	-0.118727	0.369038	0.692682	0.201921	0.78971	0.0490867	0.0560261	0.108879
P63005	PAFAH1B1	P63005_PAFAH1B1	0.00575927	0.0214797	0.0229004	0.0129262	-0.0174171	0.041243	-0.027675	0.051024	0.0143553	0.0200577	0.0551957	-0.00288828	0.0186342	-0.0144996	0.0398403	0.0731347	0.0356239	0.051024	0.142913	0.993177	0.999983	0.168752	-0.00284765	0.00143125	0.0282292
Q99KJ8	DCTN2	Q99KJ8_DCTN2	-0.00144342	-0.00288828	-0.00288828	-0.0365259	-0.0439433	-0.013043	-0.0877334	-0.00578235	-0.0439433	0.0086303	-0.00288828	-0.0740006	-0.0306192	-0.125006	-0.00578235	0.0243197	0.00575927	0.0229004	0.113925	0.518457	0.376386	0.692239	-0.041055	-0.0277309	0.0172181
Q8CC35-2	SYNPO	Q8CC35-2_SYNPO	-0.109359	-0.0439433	-0.0800879	-0.106249	-0.0634092	0.0143553	-0.128156	-0.131313	-0.0908029	-0.0306192	0.108357	0	-0.0558912	-0.0634092	-0.0291463	-0.0709665	-0.013043	-0.0816138	0.148677	0.997783	0.118237	0.652669	0.00236555	0.0625493	0.043112
P55264	ADK	P55264_ADK	0.0186342	0.0342157	-0.0291463	0.102994	0.0551957	-0.0908029	-0.0619024	-0.134477	-0.0101344	-0.0528949	-0.0603973	-0.0816138	-0.0969617	-0.16004	-0.110916	-0.147202	-0.0499049	-0.0513992	0.0238822	0.124951	0.0156538	0.022338	-0.0883273	-0.108039	-0.107583
Q3B7Z2	OSBP	Q3B7Z2_OSBP	-0.00288828	0.0370307	0.00432161	0.0129262	-0.0619024	0.00288251	-0.0664274	0	0.00575927	-0.0380063	0.0186342	-0.142417	-0.0954196	-0.0785637	0.0648829	-0.00433459	-0.0831412	-0.0543923	0.155571	0.55115	0.0709038	0.677279	-0.00862391	-0.0871876	-0.0379874
Q99JY9	ACTR3	Q99JY9_ACTR3	-0.00433459	-0.0724828	-0.011588	-0.0262051	-0.145605	0.00144197	-0.0619024	0.0690147	-0.0831412	-0.0174171	-0.0985055	-0.0816138	0.0398403	-0.142417	-0.0232698	-0.018878	0.0186342	-0.0785637	0.832131	0.965438	0.792287	0.99972	-0.0430059	-0.0627173	-0.00217735
Q8BVQ9	PSMC2	Q8BVQ9_PSMC2	-0.00723157	-0.0174171	-0.0454314	0.0243197	0.0114956	-0.0380063	-0.0335695	-0.0484122	-0.00723157	0.0200577	-0.0424568	-0.0619024	-0.0499049	-0.114035	-0.00578235	-0.0892673	-0.0350469	-0.027675	0.419036	0.924861	0.290719	0.556974	-0.0212452	-0.0375806	-0.0190366
Q6PIE5	ATP1A2	Q6PIE5_ATP1A2	-0.120294	0.00432161	0.125651	-0.125006	0.0717627	0.128293	0.0257376	0.0894981	0.151859	0.0482362	0.249749	0.0200577	0.0935602	0.546956	0.381837	0.226509	0.134878	0.138814	0.0916594	0.448184	0.0867593	0.0639852	0.147484	0.151546	0.240648
P14211	CALR	P14211_CALR	0.015783	-0.0380063	0.0827026	-0.0394883	-0.0543923	0.134878	-0.0409718	0.0565835	-0.0424568	0.0648829	0.00432161	-0.0543923	0.0731347	-0.086201	-0.00288828	0.0524159	0.0551957	-0.0664274	0.995231	0.998697	0.999069	0.999451	-0.0298602	0.0154333	0.0358755
Q922B1	MACROD1	Q922B1_MACROD1	-0.0664274	-0.018878	-0.077041	0.0186342	-0.0335695	-0.184425	-0.192645	-0.0424568	-0.0528949	-0.134477	-0.136062	-0.284546	-0.129734	-0.104697	-0.0954196	-0.172994	-0.176251	-0.0203404	0.123404	0.390088	0.0520229	0.278587	-0.0102422	-0.0918243	-0.0915541
Q62167	DDX3X	Q62167_DDX3X	-0.00723157	-0.0144996	0.0257376	-0.0203404	0.00575927	-0.0800879	-0.07552	-0.0306192	-0.027675	0.00288251	-0.00288828	-0.0306192	-0.0380063	-0.123434	0.00575927	-0.0350469	-0.0499049	-0.0877334	0.458327	0.364459	0.430844	0.401335	-0.0197536	-0.0197536	-0.0316103
Q5EBG6	HSPB6	Q5EBG6_HSPB6	0.0114956	0.041243	-0.0439433	0.0648829	0.125651	0.0100637	-0.0306192	-0.137648	-0.0320936	0.16092	0.0717627	0.0989585	0.0200577	-0.046921	-0.209228	-0.103147	-0.0740006	-0.0634092	0.0285749	0.866025	0.73589	0.0701308	-0.0569885	0.0453934	-0.114943
O88544	COPS4	O88544_COPS4	0.0313952	-0.00723157	0.00432161	0.015783	-0.0350469	-0.00578235	-0.0484122	0.0100637	-0.018878	0.00575927	-0.0291463	-0.0291463	-0.0543923	-0.0892673	-0.00868224	-0.00288828	-0.0558912	-0.0144996	0.0827268	0.231829	0.0318175	0.247312	-0.0289303	-0.0391986	-0.0216432
P04919	SLC4A1	P04919_SLC4A1	-0.0588937	-0.0439433	0.15056	0.0867838	-0.332789	0.642471	0.41792	0.0976108	0.539035	-0.186065	-0.0603973	0.919149	0.276199	0.459432	-0.0694519	0.314986	-0.0424568	-0.22095	0.460343	0.588092	0.562803	0.996793	0.3965	0.254779	-0.0773746
P85094	ISOC2A	P85094_ISOC2A	0.0621217	0.0114956	-0.117161	0.0989585	0.0648829	-0.0877334	-0.0409718	-0.164884	-0.0649175	-0.0174171	-0.00288828	-0.0380063	-0.0649175	-0.150401	-0.115597	-0.150401	0.0635029	0.117695	0.636052	0.518991	0.559776	0.905098	-0.101726	-0.0748149	-0.0628557
Q3UIJ9	MYZAP	Q3UIJ9_MYZAP	0.0271541	0.0635029	-0.0203404	0.0662614	0.041243	-0.011588	-0.0892673	-0.027675	-0.00723157	0.0243197	0.00144197	-0.07552	-0.013043	-0.0908029	0.0565835	0.0271541	0.0299829	0.0786098	0.0386261	0.194041	0.0953988	0.9351	-0.0569165	-0.0583715	-0.0020453
E9QAX2	MYO18A	E9QAX2_MYO18A	-0.0203404	-0.0409718	-0.0588937	0.0745054	0.0086303	-0.00723157	-0.110916	-0.0892673	-0.0740006	-0.0846703	-0.0954196	-0.0985055	-0.176251	-0.00433459	-0.0439433	-0.0816138	-0.136062	-0.153607	0.123025	0.532656	0.119776	0.0852834	-0.0433445	-0.0647635	-0.0781818
Q99LF4	RTCB	Q99LF4_RTCB	0.041243	0.015783	0.0758749	-0.00433459	0.0114956	0.0551957	-0.011588	0.109695	0.0342157	0.0538064	0.0565835	-0.027675	-0.0101344	-0.0247367	0.0894981	0.0854247	0.0071955	0.00432161	0.59155	0.986021	0.770125	0.930176	0.0057027	-0.0386474	0.0177971
E9PVA8	GCN1	E9PVA8_GCN1	-0.0424568	-0.0424568	0.0648829	-0.0513992	-0.0291463	0.0129262	-0.0218044	0.0426443	-0.00144342	-0.07552	-0.0513992	0.0935602	0.0129262	0.0621217	0.0565835	-0.0291463	0.0635029	-0.0350469	0.850677	0.918178	0.810541	0.742945	0.0410134	0.055383	0.0561754
P61979-2	HNRNPK	P61979-2_HNRNPK	0.0342157	0.0186342	0.0468403	0.00432161	0.0370307	-0.0218044	0.0214797	0.0468403	0.00288251	0.0086303	0.0328061	-0.07552	-0.0335695	-0.0232698	0.164786	0.077243	0.0593553	0.0524159	0.0062226	0.968671	0.215061	0.0753946	-0.00494525	-0.0496948	0.0418742
D3Z7V3	SLMAP	D3Z7V3_SLMAP	0	-0.046921	0.100305	-0.046921	0.134878	0.0867838	0.0731347	0.120352	0.0621217	0.0496308	0.0894981	0.0086303	-0.0159576	0.206643	-0.0262051	0.137504	0.15056	0.041243	0.28183	0.157282	0.387405	0.341306	0.110244	0.0730913	0.112834
E9QP49	EHBP1L1	E9QP49_EHBP1L1	-0.0101344	-0.011588	-0.0409718	0.0243197	0.00432161	0.0731347	-0.0350469	0.0370307	0.0086303	-0.0573917	-0.0558912	-0.0831412	-0.0649175	0.0313952	-0.0174171	0.0186342	0.0086303	-0.0543923	0.111086	0.575373	0.361453	0.999844	0.0194915	-0.0465305	0.0064678
Q9CQ75	NDUFA2	Q9CQ75_NDUFA2	-0.0649175	-0.0262051	-0.0619024	-0.0320936	0.0342157	-0.194295	-0.0908029	0.0621217	-0.0232698	-0.00144342	-0.0573917	0.0908534	0.109695	0.0100637	-0.118727	-0.0335695	-0.0985055	-0.0954196	0.124114	0.999535	0.265818	0.742905	0.0237282	0.0570617	-0.0499645
Q9CQC7	NDUFB4	Q9CQC7_NDUFB4	-0.177882	-0.0232698	-0.171368	-0.0306192	0.0114956	-0.1976	-0.179515	-0.121863	-0.104697	-0.161653	-0.123434	-0.21927	-0.112475	-0.0439433	-0.0588937	-0.181149	-0.131313	-0.390245	0.580024	0.984159	0.92338	0.42048	-0.0208694	-0.0224404	-0.0552374
Q9D8W5	PSMD12	Q9D8W5_PSMD12	0.00432161	0.0229004	0.0172093	-0.00433459	-0.0218044	0.0243197	-0.013043	-0.0528949	0.0143553	0.0086303	-0.0365259	-0.0306192	-0.0394883	-0.0679388	0.0593553	0.00575927	-0.013043	-0.0306192	0.151789	0.614375	0.103246	0.99105	-0.0238085	-0.0472914	-0.0144073
Q91YP0	L2HGDH	Q91YP0_L2HGDH	0.0635029	0.0662614	-0.0365259	0.0551957	0.105678	0.0186342	0.0703893	0.041243	0.100305	0.0935602	0.0867838	0.0114956	0.0086303	0.0468403	0.0257376	-0.0101344	0.0881416	0.138814	0.803532	0.671435	0.960889	0.824368	0.01104	-0.012509	-0.0024097
P18242	CTSD	P18242_CTSD	-0.0247367	0.0071955	-0.101598	-0.0159576	0.0172093	-0.114035	-0.093879	-0.0306192	-0.0619024	-0.104697	-0.0603973	-0.166503	-0.0619024	-0.112475	0.00432161	-0.114035	0.0342157	-0.00288828	0.138447	0.843965	0.169185	0.959925	-0.0415553	-0.0843499	0.0210638
P80315	CCT4	P80315_CCT4	0.0370307	0.0114956	0.00432161	0.015783	0.00144197	0.0786098	0.0342157	0.00575927	-0.00288828	0.0976108	0.0200577	-0.00433459	0.0229004	-0.114035	0.0384362	0.0086303	0.0384362	0.015783	0.893053	0.993433	0.951426	0.987903	-0.00788003	0.0064184	0.0134703
Q61035	HARS	Q61035_HARS	-0.0247367	0.0071955	0.0257376	-0.027675	-0.011588	0.0579701	-0.00723157	-0.00868224	0.0538064	0.0482362	0.0129262	0.00144197	-0.0232698	-0.0320936	0.0565835	0.0690147	0.0114956	-0.0306192	0.569456	0.680143	0.985667	0.459949	0.00153903	0.0102126	0.0428102
P24369	PPIB	P24369_PPIB	0.0257376	0.0593553	0.149259	-0.018878	-0.0306192	0.219091	0.0271541	0.228973	0.0989585	0.0200577	0.153157	0.00288251	0.115033	0.0172093	0.141433	0.189034	0.0648829	0.0186342	0.7024	0.660774	0.998063	0.748664	0.0564121	-0.0224887	0.0606115
Q9CPQ1	COX6C	Q9CPQ1_COX6C	-0.0985055	0.0621217	0.0579701	-0.0923402	0.0271541	0.0200577	-0.0985055	0.120352	0.119024	-0.112475	0.0635029	0.00432161	0.0813396	0.438293	0.199123	0.116365	0.0745054	0.119024	0.417812	0.854845	0.441521	0.295817	0.0443391	0.0806879	0.13488
Q62165	DAG1	Q62165_DAG1	-0.00723157	0.0398403	0.0935602	0.0100637	0.0384362	0.0384362	-0.0174171	0.0908534	0.0328061	-0.0394883	0.0621217	-0.114035	-0.018878	0.157044	0.136191	0.0662614	0.0854247	0.0908534	0.293126	0.999829	0.886273	0.417254	0.0134842	-0.04383	0.063187
Q9DCD0	PGD	Q9DCD0_PGD	-0.018878	-0.0558912	0.0635029	-0.0454314	-0.0785637	0.0143553	-0.00288828	-0.0409718	-0.0439433	-0.046921	-0.0218044	-0.0174171	-0.0439433	-0.161653	0.104337	-0.0380063	-0.0159576	-0.115597	0.685454	0.957809	0.5816	0.999906	-0.0088171	-0.0117886	0.00517275
E9PVD2	ITIH4	E9PVD2_ITIH4	-0.00433459	0.0129262	-0.0603973	0.0285692	-0.207561	-0.125006	0.448901	-0.117161	-0.107803	0.553852	0.0813396	0.543001	0.476122	-0.174621	-0.518701	-0.446148	-0.407364	-0.465938	0.00211603	0.999093	0.156384	0.0338632	-0.121457	0.471826	-0.460339
Q04447	CKB	Q04447_CKB	0.0384362	-0.0306192	0.0593553	0.0129262	-0.0543923	0.0114956	-0.0306192	-0.07552	-0.0232698	0.0114956	0.0229004	-0.0499049	-0.0724828	-0.190997	0.0496308	-0.0484122	-0.0306192	-0.118727	0.342558	0.424622	0.195811	0.429462	-0.0563004	-0.0755861	-0.0651969
Q9DCV4	RMDN1	Q9DCV4_RMDN1	-0.0588937	0.100305	0.0214797	-0.0174171	0.0745054	-0.00578235	-0.0694519	0.0867838	0.180148	0.0299829	0.0100637	-0.0424568	0.0299829	0.0356239	0.041243	0.0143553	-0.0573917	0.045443	0.703201	0.662954	0.999981	0.999999	0.0724741	0.0279516	0.0257679
Q8BKC5	IPO5	Q8BKC5_IPO5	0.0214797	0.0271541	-0.0101344	-0.0394883	-0.0424568	0.00575927	-0.011588	-0.0499049	0.0143553	0.0313952	0.0086303	-0.101598	-0.011588	0.0214797	0.0813396	0.0426443	0.0524159	0.0758749	0.0240688	0.832992	0.951893	0.0675259	-0.0172606	0.00295765	0.0584727
Q8VDC1	FYCO1	Q8VDC1_FYCO1	0.0370307	-0.00868224	0.0086303	0.0214797	0.116365	-0.0335695	-0.0232698	0.0143553	0.0214797	0.00144197	-0.16004	-0.0350469	-0.0679388	-0.0424568	0.0827026	0	0.0271541	0.0299829	0.0400348	0.998027	0.0901467	0.880157	-0.0006997	-0.0575118	0.0135135
Q8BTS0	DDX5	Q8BTS0_DDX5	-0.0513992	-0.00433459	0.0285692	-0.0649175	-0.0588937	-0.093879	-0.100051	0.015783	-0.0380063	-0.0709665	-0.046921	-0.161653	-0.0499049	0.00144197	0.129613	-0.0232698	0.00288251	-0.0232698	0.148594	0.730542	0.54795	0.55398	-0.0310268	-0.022038	0.0176733
Q6IRU2	TPM4	Q6IRU2_TPM4	-0.168123	-0.0694519	-0.0365259	-0.018878	-0.07552	0.673556	-0.115597	0.555816	0.289244	-0.011588	0.0214797	0.158337	0.598365	0.0867838	0.0867838	0.580145	0.382944	0.210389	0.179771	0.156946	0.370339	0.116241	0.342233	0.139773	0.349655
Q8BFP9	PDK1	Q8BFP9_PDK1	0.0524159	0.0229004	-0.0424568	0.0786098	0.108357	-0.0320936	0.0579701	-0.0320936	0.0129262	0.0579701	0.0496308	-0.0439433	0.051024	-0.00723157	0.0426443	-0.00144342	0.178874	0.201634	0.23576	0.998953	0.99765	0.261852	-0.024732	0.0119727	0.073101
Q99JR6	NMNAT3	Q99JR6_NMNAT3	-0.00288828	0.0384362	-0.0394883	0.0565835	0.0962619	-0.07552	-0.0394883	0.0313952	0.0565835	-0.0785637	-0.0709665	-0.0908029	-0.0306192	-0.0350469	-0.0454314	-0.00578235	-0.0291463	0.140124	0.174509	0.999996	0.192265	0.99994	0.0136212	-0.0887405	-0.0352383
Q8BU30	IARS	Q8BU30_IARS	0.0086303	-0.0484122	0.0370307	-0.0159576	0.015783	-0.00723157	-0.0454314	-0.0320936	-0.0558912	0.0426443	-0.0159576	0.154454	0.0440443	0.041243	-0.00868224	-0.0499049	0.0243197	0.0854247	0.116638	0.859466	0.21339	0.91497	-0.02843	0.046308	0.0114824
Q9DBG5	PLIN3	Q9DBG5_PLIN3	0.0579701	-0.013043	-0.106249	0.0129262	0.0496308	-0.1976	-0.109359	-0.129734	-0.110916	-0.137648	-0.121863	-0.192645	-0.1976	-0.217591	-0.177882	-0.190997	-0.132894	-0.0350469	0.0270782	0.193283	0.0106314	0.0676645	-0.110858	-0.192587	-0.15533
O35857	TIMM44	O35857_TIMM44	0.00288251	0.0328061	-0.0247367	0.0551957	0.0894981	-0.0499049	-0.00144342	-0.0320936	0.045443	0.0468403	0.0299829	0.0214797	0.015783	-0.0694519	0.0398403	-0.0306192	0.051024	0.045443	0.939821	0.993536	0.988502	0.979117	-0.0192877	0.0036354	0.0247973
O08532	CACNA2D1	O08532_CACNA2D1	-0.093879	-0.0306192	0.0496308	-0.0424568	-0.123434	-0.187707	-0.21927	-0.115597	-0.0588937	-0.227692	-0.217591	-0.298673	-0.234465	0.102994	-0.136062	-0.22095	-0.32916	-0.275786	0.0671861	0.279377	0.124231	0.0290038	-0.086896	-0.191154	-0.21183
P40630	TFAM	P40630_TFAM	-0.011588	-0.00433459	-0.137648	0.115033	0.0621217	-0.120294	-0.128156	-0.125006	-0.077041	-0.0558912	-0.0923402	-0.132894	-0.106249	-0.0528949	-0.174621	-0.181149	-0.129734	-0.114035	0.0783931	0.345001	0.246101	0.0300906	-0.112333	-0.0843789	-0.144216
P51125	CAST	P51125_CAST	0.0648829	-0.0454314	-0.00723157	0.0186342	-0.0394883	0.045443	-0.0320936	-0.046921	-0.0619024	0.0935602	0.0440443	-0.0439433	-0.027675	-0.137648	-0.046921	-0.0320936	0.0214797	-0.0262051	0.833762	0.700477	0.89138	0.821422	-0.0451896	-0.0333763	-0.0348507
Q99PT1	ARHGDIA	Q99PT1_ARHGDIA	-0.0247367	-0.00433459	-0.00288828	-0.0588937	-0.0365259	0.0690147	0.0129262	0.0976108	0.0271541	0.0328061	0.0827026	-0.0203404	0.0799754	-0.0800879	0.0717627	0.0881416	0.0813396	0.0299829	0.119099	0.242504	0.463243	0.0526458	0.0416897	0.0473417	0.0910868
A0A0R4J1E2	EEF1D	A0A0R4J1E2_EEF1D	0.0398403	-0.0619024	-0.0144996	0.0186342	-0.00288828	-0.013043	-0.0291463	-0.018878	-0.0380063	0.108357	-0.00433459	0.0342157	0.0565835	-0.093879	-0.0558912	-0.018878	0.0086303	-0.0144996	0.526441	0.920665	0.775076	0.933531	-0.0209453	0.0321484	-0.0187561
P10854	HIST1H2BM	P10854_HIST1H2BM	-0.0908029	-0.0484122	-0.0424568	0.0086303	-0.0203404	-0.0649175	0.00288251	0.0299829	0.00288251	-0.129734	-0.142417	-0.0203404	0.0496308	-0.0291463	0.0186342	-0.0588937	-0.123434	0.0384362	0.705197	0.751205	0.985168	0.984429	0.048317	0.0162882	0.0253048
Q9DCJ5	NDUFA8	Q9DCJ5_NDUFA8	-0.0232698	-0.0439433	-0.100051	0.0370307	-0.0159576	-0.195946	-0.110916	-0.0800879	-0.0247367	0.0565835	-0.0394883	-0.0649175	0.0635029	-0.0634092	-0.114035	-0.109359	-0.104697	-0.265345	0.0440427	0.529446	0.920109	0.0766862	-0.0464814	-0.00588175	-0.0780904
Q9WTR5	CDH13	Q9WTR5_CDH13	0.108357	-0.0203404	0.15056	-0.148801	0.0143553	0.221568	0.146655	0.140124	0.0271541	0.0229004	0.187768	-0.0101344	0.0384362	0.593593	0.279768	0.265437	0.22033	0.235114	0.248468	0.733319	0.394746	0.134615	0.0961157	-0.0055721	0.206267
Q921H8	ACAA1A	Q921H8_ACAA1A	0.0071955	-0.0603973	-0.0831412	0.0962619	-0.0365259	-0.204233	-0.132894	-0.0908029	-0.101598	-0.0588937	-0.0985055	-0.110916	-0.123434	-0.0694519	-0.077041	-0.100051	-0.112475	-0.0380063	0.0697535	0.032442	0.0950136	0.184802	-0.0749971	-0.0719046	-0.0619451
P68510	YWHAH	P68510_YWHAH	0.0538064	-0.0409718	0.015783	-0.00868224	-0.0679388	0.124328	0	0.121679	0.0342157	0.0607392	-0.0350469	0.0894981	0.27739	-0.0724828	0.015783	0.126973	0.172488	0.140124	0.43432	0.872633	0.660993	0.262785	0.0306653	0.0571888	0.129998
Q99LX0	PARK7	Q99LX0_PARK7	0.0086303	0.0538064	0.0071955	0.0285692	0.0398403	0.00432161	0.00288251	0.107018	0.0200577	0.0579701	-0.00578235	-0.0409718	0.015783	0.0607392	0.0114956	0.0440443	-0.0484122	0.0384362	0.82503	0.958905	0.986008	0.930904	0.00145795	-0.00281675	0.00636615
Q8R164	BPHL	Q8R164_BPHL	-0.0247367	0.0172093	-0.0588937	0.0342157	0.0143553	-0.194295	-0.158429	-0.00288828	0.0100637	-0.142417	-0.110916	-0.207561	-0.137648	-0.0923402	-0.200913	-0.217591	-0.140826	0.00432161	0.0787946	0.552446	0.0630066	0.0783204	0.00087542	-0.133884	-0.167106
A0A1B0GSG5	RNH1	A0A1B0GSG5_RNH1	0.077243	-0.0634092	-0.0218044	0.0854247	0.0229004	-0.0649175	0.0356239	-0.027675	-0.027675	0.128293	0.0243197	0.00432161	0.0648829	-0.104697	-0.0350469	-0.0634092	0.0854247	0.129613	0.828952	0.857468	0.999579	0.99511	-0.0553943	-0.0033996	-0.0025304
Q9R1P0	PSMA4	Q9R1P0_PSMA4	-0.120294	-0.0709665	-0.110916	-0.0588937	-0.142417	-0.101598	-0.148801	-0.120294	-0.0969617	-0.093879	-0.140826	-0.161653	-0.132894	-0.22095	-0.134477	-0.12658	-0.140826	-0.140826	0.0734989	0.327653	0.0322515	0.138532	-0.0293527	-0.0498848	-0.0467103
Q3U2A8	VARS2	Q3U2A8_VARS2	-0.0513992	-0.011588	-0.011588	-0.0499049	-0.0159576	-0.0484122	-0.0543923	-0.0350469	0.0214797	-0.0350469	-0.0262051	-0.0409718	-0.0649175	0.0579701	-0.0454314	-0.0603973	-0.0603973	-0.0694519	0.363653	0.992191	0.9455	0.482089	-0.00430045	-0.00430045	-0.0296508
F8WJE0	SAMHD1	F8WJE0_SAMHD1	-0.0513992	-0.0424568	0.0313952	0.0328061	-0.0350469	-0.0528949	-0.0513992	-0.011588	0.00144197	-0.0558912	-0.0484122	-0.0543923	-0.103147	-0.0634092	-0.0335695	-0.0306192	0.0398403	-0.0394883	0.076855	0.60563	0.0472195	0.963644	-0.0295161	-0.0503604	-0.0265635
Q91VK1	BZW2	Q91VK1_BZW2	0.0621217	0.0690147	-0.00723157	0.0690147	0.0071955	0.0648829	0.0538064	0.015783	0.0551957	0.149259	0.126973	0.045443	0.041243	0.0840643	0.100305	0.0690147	0.0579701	0.0257376	0.205991	0.967116	0.259549	0.88517	-0.0117618	0.0184961	-0.0020758
Q9DBR7	PPP1R12A	Q9DBR7_PPP1R12A	-0.0588937	0.0271541	0.0257376	-0.0785637	-0.0724828	0.192825	0.109695	0.191563	-0.011588	0.0593553	0.155749	0.0524159	0.102994	-0.0409718	0.264236	0.172488	0.182692	0.0143553	0.0999868	0.264903	0.385658	0.0402816	0.126273	0.0759334	0.194168
B8JJN0	GM20547	B8JJN0_GM20547	0.0071955	-0.046921	-0.0409718	0.108357	-0.261881	-0.28279	0.177599	-0.281036	-0.195946	0.0071955	-0.0954196	0.22033	-0.15682	-0.354759	-0.312939	-0.352916	-0.242977	-0.380822	0.0581425	0.274434	0.777395	0.0293056	-0.244993	-0.0785314	-0.316039
P35235-2	PTPN11	P35235-2_PTPN11	0.0717627	-0.0439433	-0.0262051	-0.0101344	-0.0588937	0.0086303	-0.0203404	-0.0499049	-0.018878	0.0186342	-0.0679388	0.0384362	0.0370307	-0.120294	-0.112475	-0.0203404	-0.00578235	-0.0174171	0.784399	0.800636	0.930468	0.631861	-0.00217065	0.036804	-0.000709
O09111	NDUFB11	O09111_NDUFB11	-0.0558912	-0.027675	0.0071955	0.0257376	0.0703893	-0.0424568	-0.00723157	0.0758749	0.0799754	-0.0101344	0.00432161	-0.0335695	-0.013043	0.323082	0.0676387	0.125651	0.0607392	-0.136062	0.805859	0.820178	0.645879	0.883084	0.0806291	0.00010535	0.0744287
P00920	CA2	P00920_CA2	0.0114956	-0.0291463	0.0635029	0.0593553	-0.260152	0.543991	0.443607	0.045443	0.458382	-0.200913	-0.277534	0.614474	0.195348	-0.22095	-0.172994	0.254594	-0.109359	-0.300448	0.416346	0.556466	0.999992	0.912549	0.408182	-0.236338	-0.176602
Q8BWF0	ALDH5A1	Q8BWF0_ALDH5A1	0.051024	-0.0218044	0.0071955	0.117695	0.206643	-0.0409718	0.309176	-0.027675	0.0894981	0.111031	0.0593553	0.0593553	0.041243	-0.0439433	0.0100637	-0.0409718	0.0662614	0.129613	0.654724	0.587793	0.999055	0.99995	0.0603883	0.0302455	0.0090528
Q9WV35	APOBEC2	Q9WV35_APOBEC2	-0.011588	0.0356239	-0.0454314	-0.0409718	0.0129262	0.0143553	-0.121863	-0.0320936	0	-0.0232698	-0.046921	-0.115597	-0.0159576	-0.077041	0.0426443	-0.00288828	-0.0484122	-0.0513992	0.512337	0.977278	0.441738	0.999996	0.0262799	-0.0206411	0.00062966
A0A0R4J140	CLUH	A0A0R4J140_CLUH	-0.00433459	0.0129262	-0.00578235	0.0384362	0.0384362	-0.0174171	-0.0484122	-0.0558912	-0.027675	0.0071955	0.0114956	-0.0380063	-0.0454314	0.0621217	0.0496308	-0.0262051	-0.0649175	-0.0335695	0.583151	0.476175	0.951909	0.59424	-0.0319708	0.00289969	-0.0341831
A0A075B5P2	IGKC	A0A075B5P2_IGKC	0.0313952	0.176323	0.0758749	-0.321928	-0.83908	0.154454	0.676267	-0.500218	-0.176251	0.24245	-0.715486	-0.552156	-0.0619024	-0.432455	-0.0262051	0.254594	-0.362158	-0.573467	0.778637	0.94011	0.604683	0.894793	-0.229886	-0.48609	-0.247817
P37804	TAGLN	P37804_TAGLN	-0.0558912	0.309176	0.167358	-0.652901	-0.529073	0.313826	0.365133	0.361768	-0.0174171	0.129613	0.440421	0.128293	0.126973	-0.0380063	0.657183	0.176323	0.255803	-0.351074	0.767245	0.84302	0.690964	0.65045	0.258093	0.0725596	0.16033
P62908	RPS3	P62908_RPS3	0.0313952	-0.0218044	-0.0394883	0.113701	0.0731347	-0.0573917	-0.0218044	-0.0664274	-0.093879	0.10165	-0.0588937	-0.0203404	-0.0484122	-0.0144996	-0.0664274	-0.0969617	-0.0484122	-0.07552	0.191121	0.399885	0.798658	0.102534	-0.0621871	-0.0251358	-0.0757691
Q9DC61	PMPCA	Q9DC61_PMPCA	0.00144197	-0.0409718	-0.0588937	0.0908534	0.0143553	-0.093879	-0.0365259	-0.0892673	-0.0499049	0.0538064	0.0100637	-0.0785637	-0.0573917	-0.101598	-0.0380063	-0.07552	0.0186342	0.0313952	0.603579	0.447255	0.71966	0.970048	-0.03014	-0.0376268	0.0100789
P14094	ATP1B1	P14094_ATP1B1	-0.0335695	-0.115597	0.0894981	-0.0709665	-0.00288828	0.00432161	-0.0159576	-0.0649175	0.0342157	0.0243197	0.181421	0.00144197	0.0440443	0.443607	0.0731347	0.0186342	0.045443	0.0086303	0.122412	0.975575	0.0827262	0.696188	0.0493797	0.0963123	0.0843066
Q9CZS1	ALDH1B1	Q9CZS1_ALDH1B1	0.126973	-0.169745	0.368489	-0.434403	-0.411195	0.248535	0.27023	0.186501	-0.109359	-0.0740006	0.205393	0.284514	0.0593553	-0.0877334	0.0908534	0.16092	0.134878	0.0257376	0.87876	0.957978	0.852606	0.785371	0.207887	0.0807413	0.134252
E9QNN1	DHX9	E9QNN1_DHX9	0.00432161	0.0114956	0.051024	-0.0588937	-0.0439433	0.00432161	0.0114956	0.102994	0	-0.0350469	0.0257376	-0.0424568	0.0186342	0.124328	0.181421	0.111031	0.0840643	0.0565835	0.061914	0.970657	0.945922	0.0451064	-0.00358699	0.0107256	0.089639
A0A075B5P6	IGHM	A0A075B5P6_IGHM	0.209141	0.22033	0.0607392	-0.795859	-1.27579	0.126973	0.286881	-1.08009	-0.373327	-0.0800879	-1.1976	-0.284546	-0.027675	-0.948976	-0.320126	-0.284546	-0.510457	-0.392137	0.632342	0.560644	0.481014	0.750315	-0.508267	-0.419486	-0.491072
Q8K1R3	PNPT1	Q8K1R3_PNPT1	-0.0174171	-0.00868224	-0.027675	0.0356239	0.0200577	-0.0320936	-0.0664274	-0.0454314	-0.0159576	0.0071955	0.0229004	-0.027675	-0.0588937	-0.106249	-0.0634092	-0.0335695	0.051024	0.00575927	0.712656	0.738491	0.632178	0.995068	-0.0190439	-0.0146253	-0.000855445
G3X9Q1	ITGA7	G3X9Q1_ITGA7	0.0143553	-0.027675	0.0186342	-0.0424568	0.0257376	-0.0203404	0.00288251	-0.086201	-0.046921	-0.0262051	0.0440443	-0.0740006	0.015783	0.0524159	0.0648829	-0.0694519	0.0114956	0.0257376	0.720919	0.921373	0.96418	0.909807	-0.0136805	0.0224429	0.0252765
Q7TMK9-2	SYNCRIP	Q7TMK9-2_SYNCRIP	0.0745054	-0.0247367	-0.00868224	0.0731347	0.0745054	-0.00144342	-0.0380063	-0.0499049	-0.0380063	0.0538064	-0.011588	-0.0232698	-0.0573917	-0.0291463	0.0229004	-0.0218044	0.109695	-0.0101344	0.477296	0.531041	0.477663	0.999331	-0.0702325	-0.055496	-0.0258432
Q9DCL9	PAICS	Q9DCL9_PAICS	0.00575927	-0.00288828	-0.0335695	0.0243197	0.0426443	-0.0558912	-0.00578235	-0.0454314	-0.00723157	0.0299829	-0.0203404	0.00432161	-0.0262051	-0.0543923	-0.00723157	-0.0454314	0.0565835	0.0579701	0.628473	0.916962	0.933087	0.850438	-0.00866706	-0.0217759	0.0232405
Q8BG05	HNRNPA3	Q8BG05_HNRNPA3	0.0524159	0.0398403	0.0867838	0.0731347	0.0731347	0.0398403	0.0398403	0.0908534	0.0086303	0.0786098	0.077243	-0.0985055	0.144046	0.00432161	0.0962619	-0.00288828	0.0342157	0.0935602	0.950832	0.974996	0.890713	0.994676	-0.022935	0.0144677	0.00111265
Q8VBT1	TXLNB	Q8VBT1_TXLNB	-0.018878	-0.011588	-0.0320936	-0.0365259	-0.0709665	-0.086201	-0.155213	-0.0846703	-0.121863	-0.0785637	-0.107803	-0.272297	-0.137648	-0.136062	-0.00288828	-0.114035	-0.169745	-0.0409718	0.0403823	0.127513	0.0151511	0.362008	-0.0607152	-0.110576	-0.0520176
Q8VCW8	ACSF2	Q8VCW8_ACSF2	-0.027675	0.0496308	-0.018878	0.0172093	0.349365	-0.189351	0.0745054	0.182692	0.204141	0.0257376	-0.24127	-0.0159576	-0.0800879	0.0440443	-0.205896	-0.168123	0.0745054	-0.0218044	0.155395	0.450205	0.858428	0.712326	0.183526	-0.0151233	-0.0941294
Q6PHQ9	PABPC4	Q6PHQ9_PABPC4	-0.0424568	0.0384362	0.0299829	-0.0394883	-0.013043	0.0114956	-0.101598	-0.0365259	0	-0.00868224	0.0676387	-0.0877334	-0.0985055	0.0579701	-0.0101344	-0.0101344	-0.0484122	-0.07552	0.826158	0.833833	0.982336	0.725355	-0.0082903	-0.00392954	-0.0245206
P06801	ME1	P06801_ME1	0.0786098	-0.0203404	0.0243197	-0.0262051	0.0129262	-0.171368	-0.013043	0.0186342	-0.0740006	0.00144197	-0.137648	0	-0.137648	-0.22095	0.22033	-0.139236	-0.0588937	-0.139236	0.477994	0.734971	0.29249	0.884883	-0.0150326	-0.139638	-0.101054
P19157	GSTP1	P19157_GSTP1	0.015783	0.051024	0.0786098	0.00432161	0.0607392	0.0648829	0.0854247	0.0690147	0.0328061	0.132248	0.0962619	0.0271541	0.0867838	0.0086303	0.0370307	0.0440443	-0.0203404	0.0468403	0.279784	0.604671	0.411936	0.952295	0.0314794	0.0533803	0.007134
Q9DCZ4-3	APOO	Q9DCZ4-3_APOO	0.041243	0.0731347	-0.0291463	0.0908534	0.0745054	-0.0985055	-0.086201	0.0200577	0.0186342	-0.0144996	-0.0484122	-0.142417	-0.0513992	0.0538064	-0.0424568	-0.0985055	-0.0513992	0.0313952	0.246497	0.421173	0.169593	0.202182	-0.0385546	-0.105601	-0.104117
Q06890	CLU	Q06890_CLU	0.164786	-0.0350469	0.0538064	-0.137648	-0.110916	0.134878	0.444667	-0.00144342	0.0129262	0.243669	0.132248	0.248535	0.214125	-0.200913	-0.200913	-0.0350469	-0.0499049	-0.21927	0.170029	0.793958	0.61505	0.532058	0.00354645	0.204745	-0.134789
Q9CQM9	GLRX3	Q9CQM9_GLRX3	0.0440443	0.0243197	-0.0306192	0.112367	0.0214797	-0.0619024	-0.0174171	-0.0985055	-0.0424568	0.0717627	-0.0291463	-0.0603973	-0.0603973	-0.184425	-0.0800879	-0.150401	-0.106249	-0.0679388	0.051567	0.204921	0.123451	0.0201893	-0.0766388	-0.0945793	-0.12735
Q8BWM0	PTGES2	Q8BWM0_PTGES2	0.0635029	-0.013043	0.0229004	0.0989585	0.108357	-0.100051	-0.0439433	-0.0877334	0.0114956	0.0854247	-0.0101344	-0.046921	0.0299829	-0.00723157	0.00288251	-0.0877334	0.0271541	0.0635029	0.52877	0.329917	0.784934	0.686855	-0.0871449	-0.0504332	-0.0281833
Q9QUM9	PSMA6	Q9QUM9_PSMA6	0.0086303	-0.0543923	-0.0634092	0.0328061	-0.0664274	-0.121863	-0.0394883	-0.0619024	-0.0543923	0.00288251	-0.0923402	0.00144197	-0.00288828	-0.118727	-0.0484122	-0.114035	-0.0218044	0.00432161	0.51084	0.312487	0.813467	0.781044	-0.0390214	0.0199927	-0.0122273
P09055-2	ITGB1	P09055-2_ITGB1	0.0172093	-0.0262051	0.141433	-0.0350469	0.0342157	0.269033	0.0799754	0.077243	0.100305	0.0356239	0.23634	-0.0262051	0.111031	0.415759	0.260628	0.168642	0.199123	0.153157	0.219723	0.534005	0.248671	0.124725	0.0844733	0.115529	0.18838
Q6GQT9	NOMO1	Q6GQT9_NOMO1	-0.0619024	0.0086303	0.136191	-0.0203404	-0.0365259	0.0257376	-0.0454314	0.0214797	0	-0.0846703	-0.0218044	-0.172994	-0.106249	-0.0174171	0.0143553	-0.0218044	-0.0603973	-0.103147	0.12633	0.893102	0.0761869	0.39756	0.00585505	-0.0788153	-0.0352458
Q62009	POSTN	Q62009_POSTN	0.219091	-0.027675	0.298658	-0.479955	-0.415038	0.339137	0.304511	0.306845	-0.00288828	0.00144197	0.348232	-0.0232698	-0.0218044	-0.109359	0.385155	0.0229004	0.328836	-0.351074	0.948734	0.912616	0.995336	0.941647	0.208803	-0.117512	0.0801602
Q9CY58	SERBP1	Q9CY58_SERBP1	0.0257376	0.00144197	-0.0454314	0.137504	0.138814	-0.0335695	-0.0800879	-0.114035	-0.0969617	0.0745054	-0.00578235	-0.118727	-0.093879	-0.0985055	-0.0923402	-0.137648	-0.0740006	-0.0664274	0.233475	0.471169	0.355016	0.114984	-0.0936777	-0.107469	-0.0967602
Q99J39	MLYCD	Q99J39_MLYCD	0.051024	-0.0218044	-0.0649175	0.0908534	0.0908534	-0.0892673	-0.0306192	-0.0218044	0.0114956	0.077243	0.0114956	0.00432161	0.0299829	0.00575927	-0.0543923	-0.0543923	0.0703893	0.125651	0.857255	0.924041	0.985134	0.996017	-0.0364142	-0.0031142	-0.0066113
O09131	GSTO1	O09131_GSTO1	0.00288251	-0.0409718	-0.0528949	0.0662614	0.0962619	-0.106249	-0.0528949	-0.07552	-0.0247367	0.0200577	-0.013043	-0.0649175	-0.0785637	-0.112475	-0.117161	-0.104697	-0.0174171	0.0257376	0.714459	0.868878	0.623802	0.606041	-0.0338503	-0.0458729	-0.0420124
Q61233	LCP1	Q61233_LCP1	0.0328061	-0.120294	0.0976108	-0.0365259	-0.166503	-0.0218044	-0.0262051	-0.00433459	-0.0831412	-0.00723157	-0.0573917	-0.14401	-0.107803	-0.1976	-0.0484122	0.0186342	0.0703893	-0.145605	0.336602	0.633636	0.220843	0.971024	-0.0243452	-0.105943	-0.0130291
A2AN08-5	UBR4	A2AN08-5_UBR4	-0.00288828	-0.011588	0.0285692	-0.0350469	-0.0634092	0.051024	-0.0144996	-0.0144996	0.045443	-0.0543923	-0.0291463	-0.0439433	-0.0335695	0.0989585	0.015783	0.0214797	-0.013043	-0.0350469	0.972711	0.994028	0.990188	0.999615	-0.00726146	-0.0263314	0.00860814
P28654	DCN	P28654_DCN	0.0648829	-0.0262051	0.309176	-0.392137	-0.236164	0.178874	0.196607	0.365133	-0.0634092	-0.0380063	0.228973	-0.147202	0.0593553	0.0989585	0.342555	0.232661	0.366252	0.0703893	0.341928	0.815074	0.965202	0.216709	0.159535	0.0400164	0.268269
P15116	CDH2	P15116_CDH2	0.0867838	0.0257376	0.0482362	-0.027675	0.0717627	0.121679	0.0328061	-0.0892673	0.0356239	0.0398403	0.171207	-0.148801	0.0285692	0.437228	0.238787	0.159629	0.140124	0.133564	0.385841	0.999997	0.728629	0.33603	-0.001363	0.0028534	0.11289
O70318	EPB41L2	O70318_EPB41L2	0.0172093	-0.0740006	0.0799754	-0.136062	-0.152003	-0.0291463	0.00288251	0.0370307	-0.0785637	-0.0954196	0.015783	-0.120294	-0.086201	-0.121863	0.0579701	-0.00868224	0.0621217	-0.0174171	0.205651	0.972202	0.532879	0.59254	-0.00075065	-0.0670239	0.0530396
P39054	DNM2	P39054_DNM2	0.0186342	0.0114956	0.077243	-0.0454314	0.00288251	0.113701	0.0129262	0.124328	0.0384362	-0.0365259	0.0071955	-0.011588	-0.0174171	0.015783	0.0949116	0.0786098	0.0593553	0	0.0900965	0.359103	0.752344	0.402033	0.0233713	-0.0266529	0.0539177
Q3URE1	ACSF3	Q3URE1_ACSF3	0.00144197	-0.0350469	-0.0969617	0.0342157	0.0370307	-0.177882	-0.0588937	-0.189351	-0.101598	-0.0694519	-0.204233	-0.115597	-0.152003	-0.186065	-0.215915	-0.293359	-0.112475	-0.0923402	0.0593984	0.363119	0.080164	0.0323215	-0.0847955	-0.135201	-0.147393
O08804	SERPINB6B	O08804_SERPINB6B	0.051024	0.0524159	0.0703893	-0.0664274	0.140124	0.120352	0.0935602	0.130931	0.124328	0.0384362	0.0356239	-0.00288828	-0.0724828	0.0313952	-0.100051	0.0384362	0.0214797	0.051024	0.00843776	0.0370255	0.869337	0.836748	0.072608	-0.0203248	-0.021762
Q3UIU2	NDUFB6	Q3UIU2_NDUFB6	-0.0484122	0.0313952	0.0243197	0.0328061	0.111031	0.0621217	0.0426443	0.107018	0.176323	0.0200577	0.0172093	-0.00868224	0.0398403	0.404903	0.145351	0.116365	0.132248	-0.0588937	0.607322	0.477525	0.521056	0.652178	0.0791605	-0.00779975	0.0964491
Q60649	CLPB	Q60649_CLPB	-0.0350469	0.0071955	-0.0634092	-0.00144342	0.0186342	-0.136062	-0.07552	-0.00578235	0.00144197	-0.0335695	-0.0740006	-0.140826	-0.0424568	-0.0664274	-0.0908029	-0.118727	-0.0291463	-0.0232698	0.453267	0.922117	0.349417	0.486718	0.0124628	-0.0481822	-0.0417294
Q9DBC7	PRKAR1A	Q9DBC7_PRKAR1A	0.0114956	-0.0380063	-0.0724828	0.0285692	0.0285692	-0.0218044	-0.027675	-0.0365259	-0.0159576	-0.0291463	-0.0365259	-0.177882	-0.0528949	-0.15682	-0.013043	-0.0320936	0.0129262	0.0607392	0.0432289	0.999446	0.105045	0.813088	-0.00854905	-0.0396396	0.0131969
Q9QYB1	CLIC4	Q9QYB1_CLIC4	0.0271541	-0.00144342	0.0551957	0.0299829	0.0496308	0.0894981	0.0538064	0.0496308	0.0328061	0.176323	0.124328	0.0621217	0.137504	0.0129262	0.133564	0.0690147	0.16092	0.163499	0.0155225	0.662279	0.0522556	0.0108824	0.0210623	0.0957595	0.118673
Q3TL44	NLRX1	Q3TL44_NLRX1	0.0214797	-0.00868224	-0.0335695	0.0384362	0.0867838	-0.0320936	0.0086303	0.0271541	0.0565835	0.0229004	-0.0232698	-0.00578235	0.0635029	0.0962619	0.0172093	-0.0218044	0.119024	0.0690147	0.679969	0.773055	0.747477	0.486447	0.0207554	0.0165017	0.0367133
Q62446	FKBP3	Q62446_FKBP3	-0.0424568	0.0214797	-0.117161	0.102994	0.105678	-0.123434	-0.0908029	-0.101598	-0.0985055	0.0200577	-0.0740006	-0.163268	-0.0380063	-0.115597	-0.168123	-0.16004	-0.163268	-0.152003	0.0834526	0.606196	0.454381	0.0347885	-0.0880169	-0.0635121	-0.151165
P61089	UBE2N	P61089_UBE2N	0.0129262	-0.00288828	-0.0159576	0.0690147	0.0342157	-0.0649175	-0.00578235	0.0243197	-0.0174171	0.0172093	-0.0218044	0.00144197	-0.0247367	-0.110916	-0.0439433	-0.0528949	-0.0424568	-0.0724828	0.111818	0.732376	0.252428	0.0596132	-0.0108013	-0.0268234	-0.0534381
P48036	ANXA5	P48036_ANXA5	-0.0247367	-0.217591	0.0745054	0.0662614	0.0285692	0.173767	-0.0144996	-0.0724828	-0.155213	-0.140826	0.102994	-0.253257	-0.194295	-0.0816138	-0.027675	-0.0203404	-0.0831412	-0.112475	0.538373	0.991907	0.556627	0.948164	-0.035262	-0.161588	-0.0761705
Q8K1Z0	COQ9	Q8K1Z0_COQ9	-0.0424568	0.0299829	-0.103147	-0.0218044	0.0129262	-0.192645	-0.134477	-0.011588	-0.0785637	-0.0892673	-0.134477	0.0143553	0.0071955	-0.0954196	-0.187707	-0.168123	0.0071955	0.217851	0.891562	0.850883	0.969803	0.999992	-0.0464331	-0.0571367	-0.0483331
Q925I1	ATAD3	Q925I1_ATAD3	-0.0484122	0.0086303	0.0579701	0.0426443	0.0908534	-0.0335695	-0.00144342	-0.0159576	0.077243	-0.0159576	0.0356239	-0.0306192	0.0313952	0.0717627	0.121679	0.0607392	0.107018	0.100305	0.0590683	0.984995	0.999032	0.0539069	-0.0270807	0.0057579	0.0780242
A0A1Y7VJN9	DTNA	A0A1Y7VJN9_DTNA	-0.00578235	-0.00288828	-0.0291463	0.0172093	0.0356239	-0.0424568	-0.046921	0.0313952	0.0100637	0.00575927	0.077243	-0.0664274	-0.0306192	0.111031	0.0243197	-0.0394883	-0.0101344	-0.0203404	0.772388	0.999513	0.774858	0.994931	0.014399	0.0100946	-0.0109021
Q99LP6	GRPEL1	Q99LP6_GRPEL1	-0.018878	0.0342157	-0.0499049	0.0840643	0.138814	0.0579701	-0.0528949	-0.0144996	0.0813396	0.134878	0.173767	0.0799754	0.0813396	0.0299829	0.0285692	0.0690147	0.100305	0.133564	0.183494	0.803018	0.119139	0.273909	0.0503012	0.0736707	0.076991
Q8CIE6	COPA	Q8CIE6_COPA	0.045443	-0.0439433	0.0827026	0.0086303	-0.0262051	0.0676387	0.0200577	0.077243	-0.0291463	0	-0.00433459	-0.0588937	-0.0603973	0.0662614	0.0186342	-0.013043	0.0565835	-0.0558912	0.685185	0.999957	0.619369	0.874515	-0.00697895	-0.0313712	-0.0242411
B2RQK7	SYNPO2L	B2RQK7_SYNPO2L	0.0398403	-0.0335695	-0.00578235	-0.00288828	0.0786098	0.0621217	0.0257376	0.00144197	-0.0513992	0.0370307	0.0731347	-0.0232698	-0.0424568	0.0143553	0.0328061	0.0524159	0.0949116	0.0854247	0.163984	0.72434	0.942619	0.0953452	0.0300729	0.0186906	0.0732556
Q3TML0	PDIA6	Q3TML0_PDIA6	0.0328061	-0.00578235	0.0607392	-0.0203404	-0.0159576	0.102994	0.045443	0.0676387	-0.027675	0.0922074	-0.0174171	0.0342157	0.0881416	-0.0424568	0.108357	0.134878	0.0426443	0	0.554928	0.929157	0.961258	0.383095	0.0319311	0.0207038	0.0619888
O08529	CAPN2	O08529_CAPN2	0.045443	-0.0454314	0.0370307	-0.0144996	-0.0634092	0.0257376	0.0398403	0.0172093	-0.013043	0.0313952	0.00288251	0.0384362	0.0593553	-0.0664274	0.0648829	0.0565835	0.166073	0.0229004	0.128593	0.998119	0.990837	0.130501	0.00594375	0.0201296	0.0494677
P26040	EZR	P26040_EZR	-0.132894	0.0356239	0.0731347	-0.0306192	-0.0174171	-0.086201	-0.120294	0.0621217	0.0271541	-0.0649175	-0.101598	-0.125006	-0.0892673	-0.125006	0.0731347	0.045443	-0.0394883	0.015783	0.0620084	0.978413	0.141561	0.740542	-0.0199195	-0.1041	0.0281106
P14602	HSPB1	P14602_HSPB1	0.0703893	-0.0306192	-0.0634092	0.0538064	0.151859	0.468844	0.261832	-0.011588	-0.0203404	0.414677	0.42975	0.42975	0.298658	0.0370307	0.124328	0.250962	0.293959	0.238787	0.0464011	0.275014	0.0178745	0.130285	0.140265	0.403083	0.233281
Q64516	GK	Q64516_GK	0.0565835	-0.0439433	-0.046921	0.00575927	0.0086303	-0.109359	-0.0543923	-0.128156	-0.0528949	0.0071955	-0.0247367	-0.0785637	-0.0923402	-0.0740006	-0.0923402	-0.0543923	-0.00144342	-0.0203404	0.314608	0.175116	0.360638	0.589279	-0.0353003	-0.0549086	-0.0182743
Q9CW03	SMC3	Q9CW03_SMC3	-0.0380063	-0.00288828	0.0468403	-0.0816138	-0.0969617	0.0100637	-0.0785637	0.0935602	0.0200577	-0.121863	-0.0232698	-0.163268	-0.0785637	-0.0335695	0.167358	0.0468403	-0.0262051	-0.0218044	0.115965	0.995595	0.406397	0.501726	0.030511	-0.0581164	0.0329652
O35639	ANXA3	O35639_ANXA3	0.0482362	-0.0424568	0.0690147	-0.0558912	0.0496308	0.0299829	-0.0785637	-0.00723157	-0.0380063	0.0731347	0.155749	-0.0908029	-0.0694519	-0.0543923	0.187768	0.0398403	0.0229004	0.0384362	0.453609	0.987093	0.999964	0.488528	-0.0101213	-0.057282	0.0362486
O55222	ILK	O55222_ILK	-0.0335695	0.0621217	0.0935602	-0.0816138	-0.086201	0.280956	-0.00288828	0.297485	0.15056	0.0285692	0.113701	0.0229004	0.221568	0.123004	0.145351	0.24245	0.147958	0.0676387	0.337543	0.305701	0.489432	0.222208	0.136284	0.0994249	0.132378
A0A0R4J0J0	PALMD	A0A0R4J0J0_PALMD	-0.027675	0.00575927	-0.0543923	0.00144197	-0.0409718	-0.0144996	-0.0101344	-0.0649175	-0.0409718	0.107018	0.0799754	0.0468403	-0.00868224	-0.0785637	0.0690147	-0.013043	0.0114956	0.0827026	0.107248	0.927589	0.341642	0.267627	-0.0278553	0.0599568	0.0533717
P19001	KRT19	P19001_KRT19	-0.529073	-0.200913	0.601221	-0.985645	-0.852042	-0.103147	-0.148801	0.253384	0.973795	-0.253257	-0.0740006	0.264236	-0.659723	0.210389	0.0827026	0.312665	-0.471929	-0.694321	0.863931	0.750302	0.931371	0.99205	0.261846	0.290992	0.17038
Q8BSY0	ASPH	Q8BSY0_ASPH	0.0342157	-0.0634092	0.124328	-0.00868224	0.0143553	0.0100637	0.041243	-0.00723157	-0.0350469	-0.0424568	0.0100637	-0.00144342	0.0313952	0.22033	0.0690147	0.0867838	0.0243197	0.0676387	0.628871	0.964899	0.9295	0.738967	-0.00270303	-0.00270303	0.05556
Q9D6Y9	GBE1	Q9D6Y9_GBE1	0.0214797	-0.0528949	0.0593553	0.0690147	0.113701	0.00432161	0.0894981	-0.0159576	0.0143553	0.0703893	0.0071955	0.105678	0.0299829	0.0648829	-0.0203404	-0.0350469	0.077243	0.0496308	0.689059	0.92286	0.68454	0.995776	-0.0260622	0.0244654	-0.0257723
Q64669	NQO1	Q64669_NQO1	0.0356239	0.0398403	-0.101598	0.0356239	-0.0320936	-0.152003	-0.192645	-0.226004	-0.15682	-0.253257	-0.137648	-0.411195	-0.349235	-0.0573917	0.0538064	-0.0558912	-0.112475	0.199123	0.00960315	0.141696	0.0154271	0.990066	-0.192444	-0.288881	-0.0366663
Q9WTX6	CUL1	Q9WTX6_CUL1	-0.0679388	0.0229004	0.0100637	-0.0350469	-0.0694519	0.0342157	-0.0291463	0.0200577	0.0328061	-0.0394883	-0.00723157	-0.0306192	-0.0649175	0.0922074	0.0271541	-0.00288828	-0.0649175	-0.101598	0.810447	0.945535	0.992586	0.925507	0.0325493	-0.0181276	-0.0214113
G5E8K5	ANK3	G5E8K5_ANK3	0.0328061	-0.00868224	0.0200577	-0.00288828	0.0100637	-0.00288828	-0.0306192	0.0635029	-0.0335695	0.0071955	-0.013043	-0.0144996	-0.0262051	-0.0484122	-0.011588	-0.013043	-0.0320936	-0.00288828	0.335278	0.912497	0.253872	0.398528	-0.011473	-0.0230843	-0.0209002
Q9JKB1	UCHL3	Q9JKB1_UCHL3	0.0607392	-0.0291463	-0.0816138	0.0881416	0.120352	0.138814	0.0989585	0.0186342	0.129613	0.200379	0.158337	0.168642	0.119024	-0.046921	-0.0969617	0.0496308	0.168642	0.181421	0.343103	0.334126	0.209606	0.610465	0.104556	0.142541	0.0933399
Q8BKZ9	PDHX	Q8BKZ9_PDHX	0.0200577	-0.027675	-0.0846703	0.14274	0.228973	-0.0634092	0.051024	-0.0144996	0.0607392	0.0908534	0.0426443	0.0745054	0.0086303	-0.0262051	-0.12658	-0.0499049	0.104337	0.0813396	0.845089	0.854392	0.953908	0.997026	0.0548326	0.046453	0.019526
Q9ESW4	AGK	Q9ESW4_AGK	0.0229004	0.0356239	0.0648829	0.0129262	-0.0101344	0.0186342	0.0100637	-0.0619024	0.051024	0.00144197	0.0662614	-0.0985055	-0.0380063	0.288063	0.0384362	-0.0409718	-0.00578235	-0.0679388	0.687316	0.891797	0.996228	0.711039	-0.0191984	-0.0278202	-0.0526392
P47754	CAPZA2	P47754_CAPZA2	0.0186342	0.015783	-0.0101344	0.0370307	0.0342157	0.0100637	-0.013043	0.0086303	0.0143553	0.0962619	0.0172093	0.051024	0.0745054	-0.046921	-0.0350469	-0.00144342	0.0384362	0.0538064	0.651168	0.995571	0.680758	0.999884	-0.0071449	0.0338154	0.00128779
P48722	HSPA4L	P48722_HSPA4L	0.0579701	-0.0634092	0.0100637	0.0328061	0.0328061	0.21661	0.166073	0.0143553	-0.027675	0.169925	0.102994	0.24123	0.102994	-0.100051	0.0143553	0.109695	0.154454	0.077243	0.509861	0.555804	0.349014	0.512252	0.0113712	0.0815591	0.0720341
Q9CQ65	MTAP	Q9CQ65_MTAP	0.0621217	0.0257376	0.0813396	0.0172093	0.0299829	0.0243197	0.0496308	0.0200577	0.0172093	0.0538064	0.0243197	0.0100637	-0.0365259	-0.0954196	0.0717627	0.041243	0.051024	0.0398403	0.0858584	0.776973	0.0864273	0.995929	-0.01961	-0.0338659	0.00220385
A0A0M3HEQ0	TXNRD2	A0A0M3HEQ0_TXNRD2	0.0635029	0.0496308	-0.018878	0.128293	0.187768	0.0200577	0.0398403	-0.0174171	0.0962619	0.0538064	0.0214797	-0.00433459	-0.00578235	-0.0513992	-0.0306192	-0.018878	0.0313952	0.0908534	0.366826	0.989845	0.440646	0.711766	-0.0167265	-0.0609014	-0.0503082
Q9CYT6	CAP2	Q9CYT6_CAP2	-0.0528949	-0.0218044	0.0100637	-0.0232698	-0.0558912	0.0328061	-0.0409718	-0.011588	-0.0573917	0.0440443	0.0229004	-0.0694519	-0.0694519	-0.0892673	-0.0335695	-0.027675	-0.0800879	-0.077041	0.702674	0.996579	0.96622	0.566811	-0.0184347	-0.0469148	-0.0327681
P08228	SOD1	P08228_SOD1	-0.0634092	-0.0159576	-0.0969617	-0.0218044	-0.011588	-0.0543923	-0.0499049	0.00288251	-0.0619024	0.051024	0.0565835	0.0538064	0.134878	-0.0484122	-0.046921	0.0129262	-0.0558912	0.0593553	0.0351385	0.941294	0.0229168	0.490678	-0.0072981	0.0964132	0.0256094
Q9JMA1	USP14	Q9JMA1_USP14	-0.013043	-0.0394883	-0.0664274	0.015783	-0.0365259	-0.0232698	-0.0101344	-0.046921	0.0384362	-0.0350469	-0.0740006	-0.027675	-0.114035	-0.123434	-0.115597	-0.0969617	-0.0394883	-0.0513992	0.0528944	0.955517	0.166576	0.184497	0.00299585	-0.0477349	-0.0479148
P51885	LUM	P51885_LUM	0.0440443	0.0257376	0.280956	-0.314733	-0.242977	0.186501	0.151859	0.284514	-0.0846703	-0.0785637	0.22404	-0.172994	-0.0306192	-0.027675	0.341417	0.194087	0.290424	-0.0664274	0.463185	0.962797	0.994166	0.447101	0.116968	-0.0655102	0.207365
P40142	TKT	P40142_TKT	-0.0969617	-0.0365259	0.318461	-0.215915	-0.153607	0.0867838	0.276199	0.219091	-0.00433459	-0.0740006	0.0285692	0.107018	0.0758749	-0.123434	0.663572	0.27023	0.16221	-0.12658	0.340884	0.849207	0.999682	0.263838	0.153528	0.095313	0.282964
Q9Z204	HNRNPC	Q9Z204_HNRNPC	-0.013043	-0.0320936	0.0100637	-0.0232698	-0.011588	-0.0816138	-0.0573917	0.0200577	-0.112475	0.015783	-0.00433459	-0.0679388	0.00144197	-0.0484122	0.0496308	-0.00433459	0.0565835	0.0328061	0.0397436	0.409198	0.989124	0.203494	-0.0392353	0.0138218	0.0593749
Q8C3X2	CCDC90B	Q8C3X2_CCDC90B	0.015783	0.0356239	-0.011588	0.0799754	0.0114956	-0.0232698	-0.0846703	-0.0424568	-0.0320936	-0.114035	-0.00868224	-0.15682	-0.176251	-0.018878	0.0243197	-0.0892673	-0.0291463	0.0426443	0.0323953	0.244302	0.0128217	0.574076	-0.0577971	-0.139738	-0.0281167
Q8VIJ6	SFPQ	Q8VIJ6_SFPQ	-0.0174171	0.00432161	0.0271541	-0.0543923	0.00575927	-0.0218044	-0.0454314	0.051024	-0.07552	-0.027675	0.0285692	-0.131313	0.00432161	0.105678	0.109695	0.0257376	0.0114956	0	0.577386	0.995699	0.9974	0.559617	-0.0152567	0.0108694	0.0251643
P38060	HMGCL	P38060_HMGCL	-0.00433459	-0.00433459	-0.07552	0.0786098	0.0989585	-0.121863	-0.0892673	-0.00868224	0.00432161	-0.0394883	-0.046921	-0.0543923	0.0271541	-0.0365259	-0.0454314	-0.0740006	0.0342157	0.215368	0.689879	0.957997	0.914793	0.885769	-0.00434765	-0.0351537	-0.00127326
Q8VDC0	LARS2	Q8VDC0_LARS2	0.0257376	-0.0232698	-0.0306192	0.0496308	0.0496308	-0.118727	-0.07552	-0.0101344	0	-0.0350469	-0.0740006	-0.0262051	-0.0499049	0.0703893	-0.0306192	-0.07552	-0.00433459	0.102994	0.785871	0.698165	0.821481	0.996252	-0.0113683	-0.0362808	-0.0187108
Q99M87	DNAJA3	Q99M87_DNAJA3	-0.00288828	0.0299829	-0.00433459	0.0867838	0.144046	-0.0203404	-0.0424568	0.0071955	0.00575927	0.0648829	0.0496308	0.0214797	0.0313952	-0.0291463	-0.104697	-0.0144996	0.015783	0.0398403	0.647751	0.990999	1	0.566366	-0.00778804	0.0178479	-0.0129056
P58774-2	TPM2	P58774-2_TPM2	-0.128156	0.258217	0.202888	-0.646112	-0.58208	0.367371	0.350497	0.466758	-0.0394883	0.125651	0.467801	0.189034	0.250962	0.0285692	0.687061	0.319618	0.316146	-0.296899	0.579567	0.77237	0.509299	0.443675	0.313131	0.151668	0.280516
K3W4R5	CKAP5	K3W4R5_CKAP5	0.00432161	0	0	0.045443	0.0676387	0.0426443	0.0214797	-0.013043	-0.0709665	-0.0144996	-0.0558912	0.0285692	0.0398403	0.0114956	-0.0159576	0.0200577	0.045443	0.077243	0.748045	0.999081	0.960816	0.84013	0.0193189	0.00933479	0.0305895
B7ZCF1	PSMC3	B7ZCF1_PSMC3	0	-0.0144996	-0.0203404	0.00575927	0.0086303	0	-0.0513992	0.0285692	-0.0394883	0.0579701	-0.0218044	-0.0159576	-0.027675	-0.0649175	-0.0558912	-0.0499049	-0.0144996	-0.027675	0.55116	0.996618	0.97209	0.42557	0.0072498	-0.0145546	-0.0315402
Q3THK7	GMPS	Q3THK7_GMPS	-0.00144342	-0.011588	0.0243197	0.0172093	-0.0159576	-0.0513992	-0.0409718	0.0243197	0.0114956	0.0285692	-0.0679388	-0.018878	0	-0.0846703	0.015783	0.0114956	0.00144197	-0.00578235	0.311968	0.619742	0.258791	0.999813	-0.0238405	-0.0267609	-0.00141416
Q8JZQ9	EIF3B	Q8JZQ9_EIF3B	-0.0484122	0.0129262	0.0342157	-0.00578235	-0.0484122	0.0172093	-0.077041	0.045443	-0.011588	0.0143553	-0.0144996	-0.0603973	-0.0424568	-0.0144996	0.0524159	0.0243197	-0.0424568	-0.0573917	0.868358	0.934635	0.778789	0.998089	-0.0151599	-0.0180715	-0.0126405
Q71RI9	KYAT3	Q71RI9_KYAT3	0.00288251	0.0313952	-0.0335695	0.0607392	0.0565835	0.0257376	-0.0218044	-0.0174171	0.0328061	-0.0573917	0.00144197	-0.0573917	-0.0513992	-0.00578235	-0.0439433	-0.07552	-0.0439433	0.0384362	0.108456	1	0.164816	0.231017	0.00859875	-0.0685381	-0.0610822
Q6GT24	PRDX6	Q6GT24_PRDX6	0.0186342	-0.0174171	0.00288251	0.0299829	-0.0159576	-0.0649175	-0.0394883	-0.117161	-0.0709665	-0.0335695	-0.0306192	-0.0558912	-0.0649175	-0.186065	-0.093879	-0.0923402	-0.0649175	-0.0365259	0.0448223	0.069369	0.0306941	0.0469544	-0.0756759	-0.0666496	-0.0893872
P62806	HIST1H4A	P62806_HIST1H4A	-0.0846703	-0.12658	0.0524159	-0.0203404	-0.0232698	-0.0499049	0.041243	-0.027675	-0.0588937	-0.0424568	-0.0694519	-0.0409718	-0.00433459	0.0745054	0.0271541	-0.0923402	-0.0528949	-0.00144342	0.898775	0.897394	0.796015	0.964291	0.0248304	0.0115336	0.0253362
Q02819	NUCB1	Q02819_NUCB1	-0.027675	-0.0306192	0.105678	-0.0454314	0.0071955	0.0662614	0	0.0370307	-0.00144342	0.0086303	0.0143553	-0.0394883	-0.00433459	-0.0454314	0.0271541	0.0565835	0.115033	0.00575927	0.212524	0.813958	0.936936	0.28929	0.0363426	0.0248125	0.0710159
Q8BX02	KANK2	Q8BX02_KANK2	-0.0380063	0.0313952	0.0129262	-0.104697	-0.121863	-0.011588	-0.0424568	0.0200577	-0.0785637	-0.0291463	0.0243197	-0.0320936	-0.027675	-0.0543923	0.104337	-0.0320936	-0.0365259	-0.0603973	0.752042	0.876286	0.999992	0.933219	-0.0299168	-0.0166062	-0.0217697
P62702	RPS4X	P62702_RPS4X	-0.046921	0.0086303	0.164786	-0.018878	-0.0306192	0.180148	0.0607392	-0.103147	0.10165	0.151859	0.137504	0.0758749	0.0370307	0.237564	0.204141	0.0894981	0.0229004	0.0813396	0.331475	0.989238	0.268023	0.547964	0.0658631	0.142628	0.0905427
Q8R404	MIC13	Q8R404_MIC13	0.0384362	0.0827026	0.0313952	0.0935602	0.0854247	-0.0291463	-0.046921	-0.0159576	0.0881416	0.0285692	-0.0247367	-0.0528949	0.0962619	0.0676387	-0.0380063	-0.00723157	0.00575927	0.151859	0.73884	0.589193	0.691914	0.79412	-0.076527	-0.0320002	-0.0613055
P68040	RACK1	P68040_RACK1	0.015783	0.0257376	-0.011588	0.0243197	0	-0.00288828	-0.0649175	0	-0.0558912	0.0731347	0.00144197	0.0243197	0.015783	-0.0528949	0.0186342	-0.0439433	-0.00578235	0.0621217	0.363139	0.31677	0.999909	0.991761	-0.0229396	-0.00426835	-0.0136254
E9Q9C3	AFDN	E9Q9C3_AFDN	-0.0218044	0.0496308	-0.0101344	-0.0159576	0.0229004	-0.0484122	-0.0603973	0.0313952	-0.0394883	-0.134477	-0.0247367	-0.172994	-0.115597	-0.0740006	0.0976108	0.0229004	-0.00288828	-0.00288828	0.00410995	0.865821	0.0121192	0.721036	-0.0264423	-0.102551	0.0230521
Q80YQ1	THBS1	Q80YQ1_THBS1	0.0313952	0.100305	0.153157	-0.0174171	-0.0232698	1.96975	0.505891	1.93319	1.35783	0.290424	-0.046921	1.33571	2.08644	0.860764	0	1.81188	1.43189	1.27381	0.173669	0.117017	0.259429	0.15014	1.29198	0.794914	1.287
Q3UPL0	SEC31A	Q3UPL0_SEC31A	-0.00723157	-0.0350469	0.0662614	-0.0785637	-0.0740006	0.0356239	-0.0439433	0.0468403	-0.0800879	-0.0409718	-0.011588	-0.0969617	-0.0816138	-0.0603973	0.0172093	-0.00144342	0	-0.0831412	0.529227	0.984113	0.435296	0.999443	-0.0228041	-0.0392581	0.0204175
Q02248	CTNNB1	Q02248_CTNNB1	0.0881416	-0.0262051	-0.013043	-0.0262051	-0.0394883	-0.00288828	-0.00723157	-0.0923402	-0.086201	0.0468403	0.0731347	-0.0846703	0.00575927	0.0229004	0.0894981	0.0214797	0.041243	0.0257376	0.088858	0.306594	0.992246	0.550116	-0.0198642	0.0425245	0.0531144
Q9Z1Z2	STRAP	Q9Z1Z2_STRAP	-0.0247367	0.0551957	0.0328061	0.0271541	0.0114956	0.0257376	-0.0619024	-0.00868224	-0.013043	0.0299829	0.0579701	-0.0831412	-0.0800879	-0.0816138	0.0271541	-0.0291463	-0.0634092	-0.134477	0.29442	0.706767	0.338954	0.179521	-0.0386623	-0.110068	-0.0762579
A2AKD7	SNTA1	A2AKD7_SNTA1	0.0285692	0.0214797	-0.0203404	0.0342157	0.0328061	-0.106249	0	-0.00868224	0.00575927	0.0129262	-0.0247367	-0.101598	-0.0174171	-0.0846703	-0.0101344	-0.0724828	-0.0664274	0.0100637	0.258065	0.593296	0.154587	0.279652	-0.0250245	-0.0497612	-0.0633053
F6TQW2	IGHG2C	F6TQW2_IGHG2C	0.0635029	0.280956	0.292782	-0.671164	-0.85726	0.372952	1.08338	-0.54372	0.138814	0.796598	-0.706041	-0.85726	-0.0969617	-0.926865	0.41792	0.509949	-0.351074	-0.456009	0.740824	0.998964	0.753295	0.999516	-0.0334155	-0.87827	-0.138806
Q9D819	PPA1	Q9D819_PPA1	0.0257376	0.0143553	0.0894981	0.149259	0.0922074	0.0229004	0.0690147	-0.0800879	0.0200577	0.178874	0.0840643	0.0989585	0.015783	-0.129734	0.0356239	-0.0159576	0.123004	0.0214797	0.872232	0.745256	0.964932	0.921453	-0.0347174	0.0264464	-0.029066
O35381	ANP32A	O35381_ANP32A	0.00432161	0.0229004	0.0313952	-0.00578235	-0.00144342	-0.0218044	-0.027675	0.0703893	0.0086303	-0.018878	-0.00433459	-0.134477	0	0.0114956	0.137504	0.0100637	0.0143553	0.0143553	0.206688	0.990333	0.436959	0.693626	-0.0150544	-0.0179456	0.000744295
A2A841	EPB41	A2A841_EPB41	-0.00578235	0.00288251	0.0356239	0.0328061	-0.148801	0.365133	0.22033	0.137504	0.305679	-0.0923402	-0.117161	0.482332	0.16092	-0.0499049	-0.132894	0.16092	-0.0558912	-0.147202	0.358541	0.446293	0.925202	0.935507	0.202486	-0.0677492	-0.112237
Q9Z2U1	PSMA5	Q9Z2U1_PSMA5	-0.0232698	0.0243197	0.0200577	0.00288251	-0.0144996	0.0143553	-0.0144996	-0.00868224	0.0468403	0.00288251	-0.0499049	-0.0499049	0.00575927	-0.0969617	-0.0101344	0.015783	0.0243197	-0.0203404	0.119419	0.999794	0.117956	0.996335	-0.0201523	-0.061375	-0.0086458
P27612	PLAA	P27612_PLAA	-0.0174171	0.0172093	0.045443	-0.0159576	-0.0335695	0.0299829	-0.0424568	-0.0203404	0.0342157	-0.0218044	-0.0306192	-0.0679388	-0.115597	-0.0454314	0.00575927	0.0100637	-0.046921	-0.112475	0.12806	0.919275	0.0863494	0.335595	-0.0209663	-0.0460572	-0.0212067
O35887	CALU	O35887_CALU	0.0398403	-0.0908029	0.128293	-0.140826	-0.136062	0.045443	-0.0247367	0.015783	-0.0877334	0.0867838	0.0717627	-0.0320936	-0.00723157	-0.0484122	0.0482362	0.0328061	0.0648829	-0.0923402	0.739596	0.960076	0.904745	0.922063	0.0007446	0.0182497	0.0660024
Q6P3A8	BCKDHB	Q6P3A8_BCKDHB	0.0468403	-0.00433459	-0.0908029	0.108357	0.0607392	-0.166503	-0.0513992	-0.140826	-0.0499049	0.0299829	-0.086201	-0.0454314	-0.0159576	-0.120294	-0.166503	-0.212568	-0.0908029	-0.0499049	0.109419	0.273673	0.493354	0.0466374	-0.0726521	-0.0666843	-0.149906
Q9ET54	PALLD	Q9ET54_PALLD	-0.0558912	-0.0291463	-0.0394883	-0.110916	-0.093879	-0.00433459	-0.0785637	-0.00868224	-0.100051	0.0100637	0.0565835	0.116365	-0.027675	-0.0291463	-0.0380063	-0.0101344	-0.131313	-0.177882	0.0480603	0.999925	0.112126	0.79087	-0.0308739	0.0577535	-0.0369699
Q8BMS4	COQ3	Q8BMS4_COQ3	0.051024	0.0398403	-0.0380063	0.145351	0.164786	-0.237864	-0.07552	-0.118727	-0.0101344	-0.093879	-0.128156	0.0635029	-0.013043	-0.14401	-0.237864	-0.187707	0.0129262	0.197865	0.590625	0.523744	0.472071	0.573782	-0.120952	-0.139311	-0.132823
Q01339	APOH	Q01339_APOH	0.128293	-0.0619024	-0.0603973	0.124328	-0.158429	-0.314733	0.207893	-0.16004	-0.194295	-0.0218044	-0.0218044	-0.0335695	-0.117161	-0.254978	-0.334607	-0.217591	-0.195946	-0.296899	0.0483504	0.220496	0.390968	0.0179265	-0.192005	-0.0655348	-0.28921
Q3TGU7	PA2G4	Q3TGU7_PA2G4	-0.0409718	-0.013043	0.0635029	0.00432161	-0.00288828	0.0827026	-0.0350469	0.0579701	0.0881416	0.00288251	0.0607392	-0.013043	0.0200577	-0.0634092	0	0.0271541	0.00432161	-0.0203404	0.518561	0.51477	0.99975	0.999992	0.0623308	0.0072432	0.0065215
B1B1A8	MYLK	B1B1A8_MYLK	-0.155213	0.167358	0.190299	-0.281036	-0.300448	0.265437	0.227741	0.31034	0.0976108	0.0114956	0.292782	0.129613	0.15056	0.0313952	0.473008	0.187768	0.155749	-0.166503	0.661255	0.657571	0.643961	0.511719	0.221668	0.12354	0.165686
A0A0R4J0I6	ACAD11	A0A0R4J0I6_ACAD11	0.0840643	-0.123434	-0.0877334	0.133564	0.0285692	-0.0306192	-0.0218044	-0.187707	-0.0709665	-0.013043	-0.07552	0.0551957	-0.0892673	-0.0424568	-0.207561	-0.236164	0.00288251	-0.158429	0.166912	0.674175	0.896634	0.0904048	-0.0287846	-0.0406222	-0.18116
Q9CXI0	COQ5	Q9CXI0_COQ5	0.0086303	0.0313952	-0.00868224	0.0717627	0.0356239	-0.115597	-0.0785637	-0.011588	0.0071955	0.00144197	-0.0203404	-0.0380063	-0.0908029	-0.129734	-0.166503	-0.112475	-0.0634092	-0.0380063	0.0420067	0.280754	0.0976998	0.0172686	-0.0316007	-0.0580191	-0.107955
P24549	ALDH1A1	P24549_ALDH1A1	-0.0484122	-0.163268	0.423309	-0.323733	-0.364013	0.00144197	0.041243	0.00288251	0.0827026	-0.362158	-0.296899	-0.0350469	-0.117161	-0.239566	0.157044	-0.0218044	-0.086201	-0.239566	0.504423	0.997897	0.427495	0.998068	0.108723	-0.133726	0.0518374
A0A1B0GRP7	PLPBP	A0A1B0GRP7_PLPBP	0.0200577	0.0922074	-0.0159576	-0.0262051	0.0384362	0.0440443	0.0143553	-0.011588	0.0524159	0.0894981	0.163499	0.00432161	0.0271541	0.00144197	0.0114956	0.0100637	0.0648829	0.0426443	0.643165	0.978311	0.483436	0.945516	0.0363861	0.025104	0.0250199
P10107	ANXA1	P10107_ANXA1	0.15056	-0.0908029	0.214125	-0.2567	-0.195946	0.128293	0.128293	0.157044	-0.0694519	0.0799754	0.169925	0.0482362	0.0551957	-0.0634092	0.27858	0.104337	0.243669	0.0243197	0.468924	0.987598	0.903584	0.330192	0.0984145	0.0253172	0.144124
Q9JIF9	MYOT	Q9JIF9_MYOT	0.109695	-0.00144342	-0.179515	0.041243	0.266637	0.0356239	0.202888	-0.190997	-0.0350469	0.0243197	0.0593553	0.0607392	-0.0350469	0.0100637	-0.109359	-0.104697	0.0799754	0.100305	0.851778	0.794144	0.964894	0.999999	0.0157241	0.00441991	-0.0322606
P97467	PAM	P97467_PAM	0.077243	-0.446148	0.736388	-0.859876	-0.696658	0.432959	0.387363	0.463622	0.0285692	-0.375197	0.140124	0.144046	0.0962619	0.349365	0.00144197	0.495695	0.196607	-0.0846703	0.820426	0.751532	0.853913	0.719984	0.571816	0.324577	0.283477
Q9JMC3	DNAJA4	Q9JMC3_DNAJA4	0.0313952	-0.0603973	0.0356239	0.0299829	0.0881416	0.0690147	0.0854247	0.0313952	0.0313952	0.146655	0.0129262	0.0894981	-0.00288828	-0.0954196	-0.109359	-0.0380063	0.102994	0.00432161	0.481002	0.55253	0.939036	0.958658	0.0383257	-0.0177628	-0.0475314
Q3U0V1	KHSRP	Q3U0V1_KHSRP	-0.0588937	-0.00868224	0.0635029	-0.123434	-0.0634092	-0.0350469	-0.0424568	0.133564	-0.0724828	-0.0664274	0.00288251	-0.125006	-0.0634092	0.0813396	0.130931	0.0867838	0.0200577	0.0229004	0.239558	0.977835	0.999932	0.209825	-0.00866883	-0.0296212	0.0886301
P70335	ROCK1	P70335_ROCK1	-0.0247367	0.0328061	0.0621217	-0.142417	-0.163268	0.0100637	0	0.0962619	-0.00288828	-0.0877334	-0.0232698	-0.0320936	0.0285692	-0.103147	0.0935602	0.0214797	0.0200577	-0.018878	0.561145	0.998567	0.916034	0.697073	-0.0040347	-0.0361283	0.016734
Q9D1A2	CNDP2	Q9D1A2_CNDP2	0.0214797	-0.0380063	0.0356239	-0.00723157	-0.0159576	0.0482362	0.015783	0.00288251	-0.0513992	0.0551957	-0.0218044	0.0200577	-0.00288828	-0.187707	-0.0174171	0.00144197	-0.0101344	-0.0424568	0.826688	0.999587	0.75922	0.919772	-0.00424156	-0.0100123	-0.0208998
O54988-2	SLK	O54988-2_SLK	0.0271541	-0.0144996	-0.0247367	0.0593553	0.0328061	-0.0558912	-0.0144996	-0.0969617	-0.0785637	-0.00578235	-0.0649175	-0.0892673	-0.0846703	-0.109359	-0.0335695	-0.086201	0.00575927	0.0129262	0.0895418	0.205347	0.0383034	0.514651	-0.0622185	-0.0909976	-0.0202324
Q9WUA2	FARSB	Q9WUA2_FARSB	0.0257376	-0.0218044	-0.0365259	0.0186342	-0.0409718	-0.0499049	-0.0439433	-0.0588937	-0.0816138	0	-0.0588937	-0.112475	-0.0394883	-0.112475	-0.0247367	-0.12658	-0.0603973	-0.0724828	0.0711444	0.126163	0.0620148	0.0498444	-0.0483198	-0.0573086	-0.0648549
O55029	COPB2	O55029_COPB2	0.0356239	-0.0394883	0.045443	-0.0409718	-0.0588937	0.0356239	0.0214797	0.041243	-0.0174171	0.0129262	-0.0365259	-0.0679388	-0.0603973	-0.0985055	0.0243197	0.00144197	0.0690147	-0.0174171	0.108787	0.997305	0.21747	0.850174	0.0234119	-0.0584651	0.014813
Q9CWG8	NDUFAF7	Q9CWG8_NDUFAF7	-0.0203404	0	-0.013043	0.045443	0.015783	-0.0785637	-0.0499049	-0.0664274	-0.0159576	-0.0454314	-0.0543923	-0.0306192	-0.104697	-0.0908029	-0.046921	-0.0679388	0.0172093	-0.0499049	0.0715015	0.205818	0.0266801	0.272736	-0.0433834	-0.0478708	-0.0418914
P46460	NSF	P46460_NSF	0.0243197	-0.013043	0.051024	-0.0159576	-0.0954196	0.0786098	0.0398403	0.0949116	0.0621217	-0.0409718	-0.0694519	0.0690147	0.0186342	-0.0724828	-0.0439433	0.0703893	-0.0800879	-0.137648	0.317476	0.904312	0.834719	0.476017	0.0564834	-0.0466102	-0.067654
Q61598	GDI2	Q61598_GDI2	0.015783	0	0.0186342	-0.0320936	-0.147202	-0.0424568	-0.013043	-0.0174171	-0.00723157	0.0086303	-0.0350469	0.051024	-0.0394883	-0.136062	-0.0335695	-0.0543923	0.045443	0.00432161	0.59004	0.453375	0.724274	0.985853	-0.0253086	-0.0429384	-0.0225154
B1AX58	PLS3	B1AX58_PLS3	0.0086303	0.0468403	0.108357	-0.114035	-0.107803	0.0384362	0.0745054	0.0786098	-0.0218044	0.0328061	0.0468403	-0.0679388	-0.0619024	-0.0634092	0.246104	0.0989585	0.112367	-0.0528949	0.248879	1	0.876884	0.372871	0.0107009	-0.0896377	0.0779274
O35685	NUDC	O35685_NUDC	-0.0380063	-0.0218044	-0.0247367	-0.0528949	0.00288251	0.0482362	-0.0291463	-0.0159576	-0.0588937	0.130931	0.0676387	0.051024	0.0551957	-0.0740006	0.0129262	-0.0335695	0.0440443	-0.00288828	0.123131	0.796197	0.0622722	0.522031	0.0154139	0.0865672	0.0363905
E9Q3L2	PI4KA	E9Q3L2_PI4KA	0.0071955	-0.0262051	0.0243197	0.0100637	-0.00144342	0.0129262	-0.0247367	-0.0484122	0.00432161	-0.00868224	-0.00144342	-0.0892673	-0.0144996	0.116365	0.0648829	-0.0306192	0.0690147	-0.0424568	0.889755	0.940204	0.999256	0.97721	-0.010073	-0.0173118	0.00850225
Q9R1P4	PSMA1	Q9R1P4_PSMA1	-0.0291463	0.0426443	0.0538064	0.0200577	-0.107803	0.041243	-0.077041	0.0071955	0.0440443	-0.0528949	0.00288251	-0.114035	-0.0892673	-0.117161	-0.0603973	-0.0785637	-0.104697	-0.148801	0.02054	0.528653	0.0394827	0.0149311	-0.0241555	-0.120618	-0.122981
P62196	PSMC5	P62196_PSMC5	0.0299829	0.00144197	-0.0218044	0.0285692	0.0313952	-0.0203404	-0.00433459	-0.0454314	-0.0101344	0.0690147	-0.046921	-0.0247367	-0.0320936	-0.0954196	-0.0603973	-0.0499049	-0.0365259	-0.0394883	0.221631	0.777186	0.375212	0.123243	-0.02514	-0.0470992	-0.0597022
Q99L47	ST13	Q99L47_ST13	0.0143553	-0.046921	-0.013043	-0.0350469	-0.110916	0.0962619	-0.0247367	-0.0365259	-0.0785637	0.120352	0.129613	0	0.0356239	-0.0969617	0.0313952	-0.0159576	0.0356239	-0.0380063	0.440329	0.990324	0.463777	0.926957	-0.012481	0.0596688	0.0317638
Q5GIG6	TNNI3K	Q5GIG6_TNNI3K	0.0243197	-0.0499049	-0.0174171	0.0538064	-0.0409718	-0.118727	-0.0954196	-0.00578235	-0.0424568	-0.129734	-0.0694519	-0.209228	-0.168123	0.141433	-0.077041	-0.139236	-0.128156	-0.150401	0.208599	0.526569	0.272508	0.109762	-0.0459081	-0.133185	-0.137147
Q8QZY1	EIF3L	Q8QZY1_EIF3L	0.0071955	-0.0306192	0.00432161	0.0114956	-0.0101344	0.0299829	-0.0291463	-0.046921	-0.0320936	0.0607392	-0.00288828	0.0086303	-0.0203404	0.0593553	0.051024	-0.0218044	0.0257376	-0.0101344	0.275085	0.784594	0.558608	0.875265	-0.0349049	0.00287175	0.00204305
Q3TPJ8	DYNC1I2	Q3TPJ8_DYNC1I2	0.0440443	-0.027675	0.0172093	0.0881416	0.0214797	-0.0634092	-0.018878	-0.046921	-0.0816138	0.0200577	-0.093879	-0.093879	-0.0439433	-0.15682	-0.0785637	-0.0679388	-0.0291463	-0.011588	0.0455745	0.135905	0.0180415	0.104203	-0.0775478	-0.124506	-0.0791693
Q8R5H1	USP15	Q8R5H1_USP15	-0.0409718	0.0214797	-0.00433459	0.00288251	-0.0694519	0.0100637	-0.0954196	-0.00288828	-0.00288828	-0.0543923	-0.0528949	-0.0740006	-0.112475	-0.0969617	-0.0365259	-0.0679388	-0.147202	-0.129734	0.018782	0.616753	0.0385098	0.0155799	-0.00216224	-0.0732746	-0.0981104
G3X8Y3	NAA15	G3X8Y3_NAA15	0.0186342	0.0071955	0.0243197	-0.00144342	-0.0203404	0.0172093	-0.0232698	-0.0499049	0.109695	0.051024	0.0384362	0.0496308	-0.0484122	-0.00578235	-0.0439433	-0.0350469	-0.011588	-0.109359	0.162916	0.995381	0.996905	0.167163	-0.0332553	0.0255213	-0.0524099
E9QP99	GOLGA3	E9QP99_GOLGA3	0.0426443	-0.0203404	-0.0306192	0.015783	0.0690147	-0.0439433	0.167358	-0.0306192	-0.0439433	0.045443	-0.0603973	0.21661	0.237564	-0.112475	-0.0101344	0.0271541	0.195348	0.149259	0.650176	0.980813	0.715572	0.532728	-0.0283405	0.0477217	0.0904852
P56382	ATP5E	P56382_ATP5E	-0.232769	-0.153607	-0.332789	-0.027675	-0.0558912	-0.415038	-0.268817	-0.21927	-0.281036	-0.181149	-0.236164	-0.242977	-0.163268	-0.166503	-0.295128	-0.416962	-0.258425	-0.158429	0.543084	0.717835	0.996856	0.454035	-0.075629	0.012039	-0.0835885
P14685	PSMD3	P14685_PSMD3	0.0271541	0.0129262	0.0840643	0.0186342	0.00288251	0.109695	0.015783	0.0426443	0.0370307	0.045443	0.045443	-0.0262051	-0.0709665	0.107018	0.0100637	0.0143553	-0.0335695	-0.129734	0.221881	0.996823	0.949769	0.210328	0.0141365	0.0225488	-0.034647
Q9D832	DNAJB4	Q9D832_DNAJB4	-0.0499049	-0.0335695	0.00432161	0.0229004	-0.0291463	0.0607392	-0.0619024	-0.0306192	-0.0528949	0.0342157	-0.0320936	0.0257376	0.0172093	-0.109359	-0.0877334	-0.0634092	-0.00868224	-0.0573917	0.558591	0.983963	0.999954	0.486881	-0.0159953	0.0318332	-0.0457765
Q62000	OGN	Q62000_OGN	0.0243197	0.00432161	0.353888	-0.486004	-0.434403	0.129613	0.199123	0.286881	-0.145605	-0.248108	0.166073	-0.416962	-0.086201	-0.15682	0.344828	0.104337	0.319618	-0.222633	0.524609	0.995788	0.846532	0.745703	0.115292	-0.171141	0.197657
Q9D3D9	ATP5D	Q9D3D9_ATP5D	-0.0877334	0.0356239	-0.0573917	-0.0365259	0.0538064	-0.120294	-0.129734	0.341417	-0.0174171	-0.0247367	-0.00144342	0.192825	0.168642	0.204141	-0.0350469	0.24732	0.0271541	0.292782	0.329565	0.847496	0.327947	0.25324	0.0295417	0.215601	0.184196
Q59J78	NDUFAF2	Q59J78_NDUFAF2	0.0342157	-0.0218044	-0.00578235	0.0758749	0.0243197	-0.0664274	-0.046921	-0.0709665	-0.0816138	0.0356239	0.0621217	-0.0262051	-0.0679388	-0.110916	-0.110916	-0.142417	-0.013043	-0.148801	0.0476525	0.20822	0.559244	0.0201784	-0.0806441	-0.0404218	-0.140883
Q9ERU9	RANBP2	Q9ERU9_RANBP2	-0.0320936	0.00575927	0.0538064	-0.100051	-0.0394883	-0.0306192	-0.0454314	0.0398403	-0.0203404	-0.086201	-0.0740006	0.121679	0.0799754	-0.0144996	0.178874	0.0356239	0.0786098	0.228973	0.0315499	0.999992	0.928754	0.031321	-0.017452	-0.00133243	0.141909
Q6ZWX6	EIF2S1	Q6ZWX6_EIF2S1	-0.0262051	-0.0877334	-0.0709665	-0.0262051	-0.0335695	0.00144197	-0.013043	-0.0262051	-0.0262051	0.0524159	-0.0484122	-0.0159576	0	-0.0877334	0.00432161	-0.013043	0.0100637	-0.0159576	0.240472	0.333405	0.342403	0.127119	0.0223807	0.0326282	0.0442251
Q80YV4	PANK4	Q80YV4_PANK4	-0.0513992	-0.0203404	-0.0484122	-0.0603973	-0.114035	-0.123434	-0.163268	-0.0985055	-0.0908029	-0.093879	-0.077041	-0.202572	-0.123434	-0.132894	-0.0679388	-0.118727	-0.148801	-0.132894	0.0157689	0.0196896	0.0103156	0.0290824	-0.0641293	-0.0735283	-0.0759048
P80317	CCT6A	P80317_CCT6A	0.0703893	0.0370307	0.0271541	0.0200577	0.00288251	0.0854247	0.0384362	0.0342157	0.0200577	0.128293	0.0172093	0.0840643	0.0229004	-0.106249	0.00144197	-0.00288828	-0.0203404	-0.0247367	0.486178	0.999714	0.984897	0.394548	0.0021233	-0.009192	-0.0437067
Q9D967	MDP1	Q9D967_MDP1	-0.0101344	0.0894981	-0.0144996	0.0313952	0.0186342	-0.131313	-0.134477	-0.0619024	0.0100637	-0.0513992	-0.0694519	-0.155213	-0.0380063	-0.115597	-0.0558912	-0.0499049	-0.120294	0.0342157	0.0889752	0.130958	0.0398112	0.246694	-0.0725328	-0.0800823	-0.0635285
O35350	CAPN1	O35350_CAPN1	-0.0543923	0.0328061	0.0524159	-0.0144996	-0.121863	0.0908534	-0.013043	0.0186342	0.0922074	-0.169745	-0.0923402	0.0100637	-0.110916	-0.0159576	-0.0603973	-0.0144996	-0.139236	-0.187707	0.0944249	0.99502	0.288057	0.155128	0.00948095	-0.101493	-0.10897
Q9EPU0	UPF1	Q9EPU0_UPF1	-0.0679388	0.00575927	0.0100637	-0.0709665	-0.0664274	-0.0262051	-0.0954196	-0.00288828	-0.0619024	-0.0588937	-0.0232698	-0.0709665	-0.0740006	0.00575927	-0.00433459	-0.0291463	-0.00723157	-0.0513992	0.650713	0.73504	0.88878	0.97818	-0.0308126	-0.0278039	0.0129008
Q8CG76	AKR7A2	Q8CG76_AKR7A2	-0.0484122	-0.0203404	-0.0724828	0.0356239	0.041243	-0.134477	-0.0724828	-0.0831412	-0.077041	-0.0218044	-0.0619024	-0.14401	-0.0908029	-0.0816138	-0.166503	-0.147202	-0.0846703	-0.0543923	0.183331	0.568099	0.329714	0.0873207	-0.0426647	-0.0472375	-0.0815599
Q9CXD6	MCUR1	Q9CXD6_MCUR1	-0.013043	-0.00288828	0	-0.00288828	-0.0350469	0.00144197	-0.101598	-0.0528949	-0.0144996	-0.0985055	-0.00433459	-0.155213	-0.121863	-0.00144342	-0.0159576	-0.077041	-0.07552	-0.106249	0.14987	0.53208	0.0909609	0.166587	-0.0321586	-0.0956172	-0.0733922
O35344	KPNA3	O35344_KPNA3	0.041243	0.0186342	0.0271541	0.0635029	0.0621217	0.0703893	-0.0335695	-0.0350469	0.0496308	0.0143553	-0.0528949	-0.0159576	-0.0846703	-0.0679388	-0.0558912	-0.0174171	-0.0144996	-0.0144996	0.0202594	0.878794	0.0188995	0.0790147	0.0154323	-0.0870935	-0.0501569
Q9DCN2	CYB5R3	Q9DCN2_CYB5R3	0.0384362	-0.0439433	0.125651	-0.0831412	-0.169745	0.121679	0.0200577	-0.011588	0.0172093	-0.0573917	0.0881416	-0.0877334	-0.0424568	0.264236	0.151859	0.0894981	0.0565835	-0.0513992	0.831828	0.995303	0.977292	0.842422	0.0199629	-0.0397033	0.0757944
Q9R069	BCAM	Q9R069_BCAM	0.0648829	-0.00578235	0.140124	-0.100051	0.0114956	0.252173	0.144046	0.0440443	0.112367	0.0482362	0.233888	0.0342157	0.134878	0.443607	0.336855	0.186501	0.243669	0.211635	0.0919565	0.550339	0.162542	0.0472634	0.0828167	0.105328	0.198102
H3BKH6	ESD	H3BKH6_ESD	-0.013043	0.0172093	-0.013043	0.045443	0.041243	0.0214797	0.0496308	0.0086303	-0.0203404	0.0482362	-0.00144342	-0.0159576	-0.0174171	-0.0218044	0.0143553	0.0370307	-0.0262051	0.0172093	0.681256	0.880596	0.885147	0.99968	0.0193965	-0.0180408	0.0136991
V9GWW6	MLIP	V9GWW6_MLIP	0.0313952	0.0342157	-0.0409718	0.0384362	0.0635029	0.0426443	0.0200577	-0.046921	-0.0203404	0.0384362	0.0690147	-0.0694519	-0.0380063	-0.0740006	0.015783	0.0257376	0.0370307	0.0827026	0.422009	0.998488	0.658262	0.803804	-0.0127477	-0.0708118	-0.0014213
P17426	AP2A1	P17426_AP2A1	0.0468403	-0.0159576	0.0840643	-0.0694519	-0.0603973	0.0100637	-0.013043	-0.00578235	-0.00144342	0.0186342	0.0071955	-0.0365259	0.0186342	0.0285692	0.0384362	-0.00433459	0.00575927	-0.0528949	0.783441	0.67757	0.997479	0.918924	-0.0212237	0.00319285	-0.014729
Q9JHK4	RABGGTA	Q9JHK4_RABGGTA	-0.0335695	0.041243	0.0398403	0.00432161	-0.0291463	-0.0320936	-0.0484122	-0.0424568	0	-0.00288828	-0.0439433	-0.0232698	-0.00868224	-0.110916	-0.013043	-0.0335695	-0.0424568	0.00432161	0.140742	0.143369	0.0765619	0.324482	-0.0541746	-0.0453508	-0.0453872
Q9Z1Z0	USO1	Q9Z1Z0_USO1	0.0328061	-0.0232698	0.10165	-0.0649175	-0.086201	0.0538064	-0.0365259	0.051024	-0.018878	-0.0694519	-0.0694519	-0.0335695	-0.0320936	-0.0634092	-0.0203404	0.0200577	0.0384362	-0.027675	0.235316	0.88947	0.162735	0.987514	-0.0236461	-0.0681773	-0.0049095
P63242	EIF5A	P63242_EIF5A	-0.0573917	-0.0174171	-0.0262051	0.0229004	-0.0409718	-0.027675	-0.0588937	-0.0816138	0.0257376	0.0299829	0.0313952	-0.0528949	0.00288251	-0.136062	-0.093879	-0.0908029	-0.0484122	-0.0709665	0.346925	0.902006	0.996115	0.250204	-0.0191607	0.0246936	-0.0590736
P57759	ERP29	P57759_ERP29	0.0086303	-0.0454314	-0.0573917	-0.0203404	-0.0335695	0.0551957	-0.093879	-0.00723157	-0.077041	0.0129262	0.0356239	-0.0619024	-0.011588	-0.0785637	-0.0619024	-0.00723157	-0.0218044	-0.0306192	0.981075	0.999427	0.985906	0.999861	-0.0006836	0.0212979	0.0066741
Q9CZD3	GARS	Q9CZD3_GARS	-0.046921	0.0593553	0.0468403	-0.0320936	-0.0484122	0.0894981	-0.0365259	0.128293	0.0285692	0.0229004	0	-0.00868224	-0.00868224	-0.018878	0.0565835	0.0635029	0.0114956	0.0285692	0.545695	0.784876	0.9835	0.669339	0.0211958	-0.0160556	0.035203
Q9CRD0	OCIAD1	Q9CRD0_OCIAD1	-0.0513992	0.0071955	-0.013043	-0.0144996	0.045443	0.0648829	-0.0454314	0.0426443	0.168642	0.0100637	0.124328	-0.0800879	-0.0291463	0.145351	0.0143553	0.00144197	0.0200577	-0.0558912	0.390126	0.297789	0.54775	0.986134	0.0592143	0.023835	0.0216699
Q9CZ44-3	NSFL1C	Q9CZ44-3_NSFL1C	-0.018878	-0.00868224	-0.0262051	-0.0573917	-0.0454314	-0.027675	-0.0634092	0.00144197	-0.00723157	-0.0543923	-0.0954196	-0.0394883	-0.0649175	-0.15682	0.015783	-0.00288828	0.0370307	0.0384362	0.00218405	0.999974	0.0548394	0.101191	-0.00513345	-0.042376	0.0489484
B1ART2	VPS13D	B1ART2_VPS13D	0	0.0565835	0.0071955	-0.00868224	0	0.0143553	-0.027675	0.0257376	0.0271541	-0.0232698	0.0908534	-0.0969617	-0.0785637	0.0143553	0.0551957	0.0186342	-0.00578235	-0.0409718	0.736693	0.995338	0.622549	0.993274	0.0107575	-0.0268676	0.00282818
D3YYU8	OBSL1	D3YYU8_OBSL1	0.0356239	-0.0694519	-0.0709665	0.0143553	0.0172093	-0.0709665	-0.0394883	-0.0528949	-0.103147	-0.0484122	-0.118727	-0.0573917	-0.077041	-0.121863	-0.00433459	-0.0203404	0.0271541	0.045443	0.0242829	0.646561	0.10496	0.518182	-0.0253466	-0.0494927	0.0389581
Q9JK92	HSPB8	Q9JK92_HSPB8	-0.0306192	-0.0335695	-0.0954196	0.0593553	0.0313952	-0.0619024	-0.0694519	-0.142417	-0.0740006	0.0593553	0.0071955	-0.0543923	-0.0409718	-0.104697	-0.270556	-0.153607	-0.107803	-0.086201	0.0490904	0.728554	0.999962	0.04146	-0.0373575	-0.00887745	-0.0986106
P19221	F2	P19221_F2	0.0786098	-0.0454314	-0.0543923	0.00432161	-0.248108	-0.190997	0.282143	-0.171368	-0.115597	0.0328061	-0.123434	0.115033	-0.128156	-0.279284	-0.279284	-0.21424	-0.265345	-0.450084	0.0700983	0.734877	0.809913	0.0358982	-0.150813	-0.102879	-0.25176
Q8BMJ2	LARS	Q8BMJ2_LARS	-0.00723157	-0.0816138	-0.0335695	-0.0174171	-0.0262051	-0.0603973	-0.0831412	-0.0831412	-0.093879	0.0172093	-0.0320936	-0.0499049	-0.112475	-0.103147	-0.118727	-0.148801	-0.0969617	-0.0954196	0.05005	0.396921	0.729002	0.0225917	-0.0576479	-0.0244116	-0.0823511
Q8CJ53	TRIP10	Q8CJ53_TRIP10	0.0328061	0.0370307	0.00144197	0.00144197	-0.0262051	-0.0439433	-0.0619024	-0.104697	-0.0908029	-0.0247367	0.0129262	-0.112475	-0.118727	-0.153607	0.0271541	-0.0144996	-0.0365259	-0.0619024	0.0271937	0.0406343	0.0172149	0.4833	-0.0790264	-0.129599	-0.0426368
Q9D6U8	FAM162A	Q9D6U8_FAM162A	0.0551957	0.0200577	0.0908534	0.0703893	0.196607	0.192825	0.187768	0.0271541	0.159629	0.149259	0.209141	-0.018878	0.0908534	0.400538	0.237564	0.16221	0.24732	0.16221	0.220457	0.349575	0.25576	0.121541	0.124975	0.0864665	0.137094
Q60902	EPS15L1	Q60902_EPS15L1	-0.027675	0.0143553	0.0356239	-0.0800879	-0.0424568	0.0703893	-0.077041	0.0342157	0.0243197	-0.00433459	0.0593553	-0.0528949	-0.0454314	-0.046921	0.0593553	0.0172093	0.00575927	-0.046921	0.840351	0.930495	0.999097	0.852404	0.0309796	-0.0387715	0.0181441
P11152	LPL	P11152_LPL	0.0086303	-0.00868224	-0.0306192	0.159629	0.255803	-0.018878	0.051024	0.0114956	0.0524159	-0.00288828	0.0867838	-0.110916	0.185232	0.259423	0.128293	-0.027675	0.136191	0.183963	0.829356	0.919985	0.834858	0.688287	0.05105	0.0868098	0.132268
Q05816	FABP5	Q05816_FABP5	0.0881416	-0.171368	-0.0892673	0.00288251	0.0676387	-0.0499049	0.116365	0.045443	-0.128156	0.267835	0.0949116	0.120352	0.217851	-0.0649175	0.0922074	0.0894981	0.27023	0.196607	0.0504587	0.805893	0.085644	0.0463155	0.0886354	0.163544	0.1876
Q6P4T2	SNRNP200	Q6P4T2_SNRNP200	-0.0291463	0.0200577	0.0786098	-0.0908029	0.0086303	0.0426443	0.0690147	0.0398403	0.145351	-0.0306192	0.0468403	-0.0380063	0.0114956	0.130931	0.191563	0.109695	0.115033	0.0440443	0.0820211	0.304217	0.823065	0.0438779	0.0471886	0.0160399	0.116908
G3X8T9	SERPINA3N	G3X8T9_SERPINA3N	0.0989585	0.00575927	0.0172093	-0.0174171	-0.139236	0.0551957	0.355016	-0.077041	-0.0513992	0.629473	0.186501	0.6107	0.555816	-0.234465	-0.153607	-0.15682	-0.14401	-0.274041	0.0251154	0.999997	0.124679	0.444829	-0.0628835	0.544332	-0.166698
P23242	GJA1	P23242_GJA1	0.0200577	0.133564	0.180148	-0.0218044	0.0989585	0.192825	0.104337	-0.00144342	0.219091	0.254594	0.420078	0.0949116	0.284514	0.683472	0.260628	0.192825	0.0840643	0.0214797	0.050303	0.933229	0.0347807	0.86856	0.0275261	0.207703	0.0616338
Q9D0S9	HINT2	Q9D0S9_HINT2	-0.0159576	0.0384362	-0.0499049	0.0186342	0.077243	-0.0247367	-0.0232698	0.0143553	0.0384362	0.126973	0.0440443	0.0468403	0.0635029	0	-0.0232698	0.0398403	0.0717627	0.16092	0.251049	0.906528	0.258474	0.228897	0.013017	0.045502	0.0544632
Q9Z1N5	DDX39B	Q9Z1N5_DDX39B	0.0299829	0.0468403	0.0867838	-0.00144342	0.0143553	0.0129262	-0.0439433	0.121679	0.0384362	0.0468403	0.0370307	-0.0969617	0.0257376	0.0524159	0.204141	0.0962619	0.0922074	0.0745054	0.0758679	0.977491	0.802639	0.175568	-0.0240563	-0.0013809	0.055823
G3X9J1	SLC8A1	G3X9J1_SLC8A1	0.0565835	-0.046921	0.123004	-0.018878	0.0271541	0.183963	0.0172093	-0.131313	0.0690147	0.128293	0.257011	0.0129262	-0.00433459	0.50284	0.27023	0.137504	0.177599	0.0758749	0.230731	0.999889	0.271292	0.378813	0.00830135	0.10944	0.138699
A0A0A0MQ68	GCDH	A0A0A0MQ68_GCDH	0.041243	0.0229004	-0.0159576	0.0989585	0.0922074	-0.131313	-0.0709665	-0.093879	-0.00868224	-0.0816138	-0.0664274	-0.140826	-0.129734	-0.0923402	-0.145605	-0.1976	-0.0846703	-0.0320936	0.0156702	0.194396	0.0150069	0.0121131	-0.103038	-0.124412	-0.147209
Q8R2P8	KARS	Q8R2P8_KARS	-0.0320936	0.051024	0.149259	0	-0.00578235	-0.00144342	-0.0831412	0.313826	0.0071955	0.0086303	0.0482362	-0.0603973	-0.0424568	0.0908534	0.0440443	0.00432161	-0.0969617	-0.118727	0.59086	0.999834	0.928246	0.527454	-0.0269554	-0.0168817	-0.071832
Q6P5E4	UGGT1	Q6P5E4_UGGT1	0.0342157	-0.0543923	0.0635029	-0.0365259	-0.0454314	0.0648829	0.0384362	0.0285692	-0.00288828	0.0172093	-0.0232698	0.0243197	0.0086303	0.00144197	0.0482362	0.0398403	0.0894981	0.00144197	0.425411	0.890841	0.997384	0.31539	0.0297243	0.0097854	0.0451934
Q99K48	NONO	Q99K48_NONO	-0.0424568	0.0129262	-0.00868224	-0.0247367	-0.00868224	-0.0380063	-0.0694519	0.0799754	-0.0513992	-0.0454314	-0.07552	-0.106249	-0.013043	-0.00868224	0.149259	0.045443	0.0579701	0.041243	0.0101509	0.999852	0.566993	0.0417787	-0.0212968	-0.0287219	0.068416
F7AA26	PAKAP	F7AA26_PAKAP	0.0214797	0.00288251	-0.0203404	0.0114956	0.0621217	0.0662614	-0.046921	0.0717627	-0.0365259	0.128293	0.077243	-0.0159576	0.0299829	0.0328061	0.0758749	0.0690147	0.0648829	0.0370307	0.274371	0.84783	0.308135	0.201008	0.0549326	0.025617	0.0597597
P52503	NDUFS6	P52503_NDUFS6	0.0186342	-0.0350469	-0.110916	0.123004	0.146655	-0.200913	-0.077041	-0.0454314	-0.0320936	0.109695	0.0229004	0.0129262	0.125651	-0.0394883	-0.110916	-0.0892673	0.0635029	-0.0247367	0.466115	0.857145	0.797389	0.884605	-0.037225	0.0311068	-0.0487956
Q99KC8	VWA5A	Q99KC8_VWA5A	0.0129262	-0.0174171	0.0662614	-0.0484122	-0.0603973	0.0285692	0.0398403	0.0328061	0.0229004	0.0200577	0.0482362	0.00144197	0.0243197	-0.0454314	0.0976108	0.0840643	0.14274	0.0676387	0.0121701	0.96849	0.989522	0.0117939	0.0308146	0.0223032	0.093083
Q9D6J5	NDUFB8	Q9D6J5_NDUFB8	-0.011588	0.0468403	0.0635029	0.0114956	0.0976108	0.0482362	0.0214797	0.051024	0.169925	-0.00723157	0.0827026	0.0086303	0.0551957	0.451013	0.154454	0.045443	0.0922074	-0.0923402	0.690706	0.855706	0.532244	0.985445	0.0218561	0.0260278	0.0396573
Q9DB05	NAPA	Q9DB05_NAPA	0.00432161	-0.00578235	0.0214797	0.00575927	-0.0985055	-0.0543923	-0.0380063	-0.07552	-0.0454314	-0.00723157	-0.0664274	-0.0664274	-0.0513992	-0.136062	-0.013043	-0.0454314	-0.0908029	-0.118727	0.0275734	0.0315665	0.0246953	0.0297461	-0.0594327	-0.0714678	-0.0731576
P62715	PPP2CB	P62715_PPP2CB	0.0243197	-0.0365259	-0.00723157	0.00575927	-0.0159576	-0.0831412	-0.013043	0.0440443	-0.00868224	0.0370307	-0.0350469	-0.0101344	0.00144197	-0.018878	0.051024	0.0100637	0.0496308	0.0745054	0.0682481	0.902815	0.999639	0.120523	-0.0123069	-0.00939825	0.0510635
Q58A65	SPAG9	Q58A65_SPAG9	0.0257376	-0.00144342	0.00575927	-0.0335695	-0.018878	0.0440443	0.0071955	-0.0159576	-0.0291463	-0.123434	-0.00868224	-0.0484122	-0.0203404	0.0186342	0.0468403	0.0086303	0.0440443	0.0086303	0.119351	0.999741	0.351456	0.56867	-0.0181155	-0.0224983	0.0241794
Q8K4Z5	SF3A1	Q8K4Z5_SF3A1	-0.0320936	0.10165	0.129613	-0.0619024	-0.00144342	0.077243	-0.0454314	0.138814	0.0786098	-0.0203404	0.0922074	-0.0558912	-0.0144996	0.0962619	0.189034	0.0989585	0.0621217	0.0356239	0.508133	0.980523	0.982222	0.529511	0.0424648	-0.0492778	0.0457619
Q3ULF4	SPG7	Q3ULF4_SPG7	0.0100637	-0.0306192	-0.0101344	-0.00868224	0.151859	0.121679	0.121679	0.121679	0.167358	0.0786098	0.16221	0.0635029	0.137504	0.585924	0.206643	0.157044	0.257011	0.276199	0.0527736	0.199563	0.0432082	0.0370934	0.131087	0.146912	0.241235
Q8K0Z7	TACO1	Q8K0Z7_TACO1	-0.0218044	-0.0679388	-0.0800879	0.0524159	0.0229004	-0.147202	-0.0709665	-0.148801	-0.0513992	0.0214797	-0.0232698	-0.0558912	-0.077041	-0.114035	-0.182786	-0.158429	-0.0365259	-0.0800879	0.282765	0.516688	0.928001	0.178767	-0.0260949	-0.0110196	-0.0743868
Q9CXJ4	ABCB8	Q9CXJ4_ABCB8	-0.0203404	0	0.0538064	-0.0954196	-0.0454314	0.0129262	-0.07552	0.0186342	0.129613	-0.0908029	0.0071955	-0.26708	-0.046921	0.545968	0.0813396	-0.00578235	-0.0247367	0.00144197	0.984054	0.993548	0.958891	0.990305	0.0230964	-0.0367508	0.00800001
P35385	HSPB7	P35385_HSPB7	0.045443	-0.0603973	-0.0740006	0.0342157	0.0745054	-0.00723157	0.0398403	-0.0499049	-0.153607	0.126973	0.015783	0.0538064	0.0172093	-0.0619024	-0.0954196	-0.0394883	0.117695	0.0799754	0.751053	0.999131	0.750873	0.914641	0.00585923	0.0303001	0.0333344
P50516	ATP6V1A	P50516_ATP6V1A	0.0524159	0.0229004	0.0662614	0.0328061	0.015783	0.0524159	0.0299829	0.0257376	0	0.0342157	-0.046921	0.00432161	0.00288251	-0.0877334	0.0214797	-0.00723157	0.0703893	0.0214797	0.0639343	0.723292	0.033688	0.798378	-0.0168734	-0.0397285	-0.0211313
Q6PDI5	ECM29	Q6PDI5_ECM29	0.0356239	0.0690147	0.0482362	0.0635029	0.0440443	0.0356239	0.0328061	-0.046921	0.0482362	0.0370307	-0.0291463	0.0342157	0.0243197	0.045443	0.0271541	0.00575927	0.0579701	0.0143553	0.368506	0.290766	0.282025	0.416428	-0.0202457	-0.0216539	-0.0351149
Q9CQ69	UQCRQ	Q9CQ69_UQCRQ	-0.128156	-0.0335695	-0.0439433	-0.0409718	-0.0335695	-0.168123	-0.148801	-0.0291463	-0.00723157	-0.140826	-0.0679388	-0.296899	-0.168123	0.158337	-0.0908029	-0.107803	-0.134477	-0.0679388	0.91952	0.990562	0.868965	0.90337	0.00888805	-0.0983685	-0.0568454
Q9JKF7	MRPL39	Q9JKF7_MRPL39	0.00144197	0.0071955	0.00144197	0.0621217	0.0976108	-0.0350469	-0.0144996	0.00144197	0.0538064	0.0356239	0.077243	-0.046921	0.00144197	-0.011588	0.144046	0.0426443	0.108357	0.197865	0.0189878	0.999639	0.9936	0.0276378	-0.00287676	-0.00287676	0.121883
Q3UHZ5	LMOD2	Q3UHZ5_LMOD2	0.0229004	-0.0335695	0.00144197	0.0370307	0.0468403	-0.00868224	0.0342157	-0.0528949	-0.0439433	0.0482362	-0.00288828	-0.0394883	-0.0218044	-0.0454314	-0.0877334	-0.0424568	-0.0101344	-0.018878	0.379824	0.933799	0.786281	0.231591	-0.0208534	-0.0339756	-0.0428386
Q9CWK8	SNX2	Q9CWK8_SNX2	0.0299829	-0.0174171	0.0922074	-0.0543923	0.0071955	0.0496308	0.0524159	0.0482362	0.0243197	0.0328061	0.0496308	-0.027675	-0.0247367	-0.0335695	0.123004	0.0867838	0.0989585	0.0398403	0.0341441	0.714008	0.92576	0.0533896	0.0419533	-0.0310196	0.0865883
P14869	RPLP0	P14869_RPLP0	0.00144197	0.0100637	-0.0101344	0.0496308	0.0356239	0.0186342	0.00144197	-0.00144342	-0.0218044	0.0662614	-0.0291463	-0.0306192	-0.00578235	-0.0439433	0.0648829	0.00144197	0.0440443	-0.00433459	0.471804	0.982831	0.644884	0.877155	-0.00431086	-0.0348991	0.0169903
P08074	CBR2	P08074_CBR2	-0.948976	-0.573467	1.20789	-1.16165	-1.04394	-0.634867	-0.646112	-0.595097	-0.610433	-0.573467	-0.488026	-0.816037	-0.913216	-0.798366	0.636915	-0.573467	-0.910502	-1.074	0.8045	0.759681	0.74213	0.988264	0.126355	-0.0371445	0.019237
G3X977	ITIH2	G3X977_ITIH2	0.015783	-0.018878	0.0328061	0.0172093	-0.261881	-0.181149	0.168642	-0.0800879	-0.145605	-0.128156	0.0524159	-0.0573917	-0.227692	-0.340075	-0.327348	-0.161653	-0.204233	-0.382702	0.0540024	0.444008	0.225896	0.0208524	-0.162101	-0.144652	-0.282287
Q3UMF0	COBLL1	Q3UMF0_COBLL1	0.0703893	0	-0.0320936	0.0745054	0.108357	-0.00723157	0.0551957	0.0285692	0.015783	0.0881416	0.0717627	-0.013043	0.0635029	0.0648829	0.0935602	0.0703893	0.116365	0.119024	0.117222	0.946103	0.648431	0.0683768	-0.00662545	0.0296882	0.0697679
P49817	CAV1	P49817_CAV1	0.0621217	-0.0424568	0.192825	-0.163268	0.0440443	0.279768	0.157044	0.0949116	0.051024	0.0703893	0.27739	0.045443	0.16092	0.621055	0.339137	0.233888	0.209141	0.154454	0.169859	0.578214	0.123767	0.151335	0.0850791	0.151088	0.211682
Q3UM45	PPP1R7	Q3UM45_PPP1R7	0.00432161	0.0313952	0.0342157	-0.0218044	0.0071955	0.0551957	-0.0306192	0.0186342	0.015783	0.0243197	0.0370307	-0.077041	-0.00144342	-0.07552	0.0200577	0.0214797	-0.013043	-0.0320936	0.542882	0.999912	0.491477	0.925574	-0.00207541	-0.0193018	-0.0143511
P63158	HMGB1	P63158_HMGB1	-0.00578235	0.0593553	0.107018	-0.121863	-0.0232698	-0.0159576	-0.0247367	0.111031	0.00432161	-0.0380063	0.0867838	-0.192645	-0.013043	0.0894981	0.286881	0.0949116	0.0962619	0.0468403	0.169537	0.999999	0.967288	0.216403	-0.0427441	-0.0398295	0.0688003
E9Q450	TPM1	E9Q450_TPM1	-0.0573917	0.0935602	-0.0380063	0.0313952	0.0243197	-0.0664274	-0.0588937	-0.0679388	0.0114956	-0.0291463	0.0579701	0.212881	0.217851	-0.0513992	-0.0740006	0.0214797	0.0827026	0.217851	0.30154	0.877354	0.54116	0.764161	-0.0555882	0.0612756	0.0553967
Q9DBD0	ICA	Q9DBD0_ICA	0.0731347	0.0071955	0.0129262	0.0086303	-0.147202	-0.0985055	0.226509	-0.104697	-0.0262051	-0.077041	-0.0439433	0.0440443	-0.171368	-0.244685	-0.171368	-0.0350469	-0.16004	-0.242977	0.144537	0.782732	0.246962	0.0879221	-0.109284	-0.0878193	-0.176482
P47962	RPL5	P47962_RPL5	-0.07552	-0.0454314	0.185232	0.0100637	-0.0588937	0.199123	0.164786	-0.16004	0.0827026	0.189034	0.0524159	0.155749	0.0745054	0.0989585	0.0579701	0.0703893	0.0200577	0.141433	0.572117	0.960596	0.406395	0.803283	0.100386	0.116642	0.0818636
Q9D1G1	RAB1B	Q9D1G1_RAB1B	0.0257376	-0.0709665	0.0690147	-0.077041	-0.205896	-0.0218044	-0.0634092	-0.123434	-0.0785637	-0.0484122	-0.018878	-0.164884	-0.0969617	0.190299	-0.046921	-0.137648	-0.125006	-0.136062	0.308095	0.375037	0.989489	0.311735	-0.0559492	-0.0257978	-0.10792
Q99PV0	PRPF8	Q99PV0_PRPF8	-0.0664274	-0.0365259	0.0976108	-0.0454314	0.051024	0.0908534	0.0328061	-0.0335695	0.0717627	-0.0365259	0.0690147	0.0200577	0.0468403	0.204141	0.232661	0.149259	0.132248	0.0881416	0.0358487	0.514082	0.30496	0.0137733	0.0920026	0.087819	0.181732
P99028	UQCRH	P99028_UQCRH	-0.0634092	-0.013043	-0.0588937	0.0257376	-0.0409718	-0.174621	-0.179515	-0.0908029	0.0356239	-0.0969617	-0.14401	-0.150401	-0.0679388	-0.140826	-0.171368	-0.128156	-0.205896	-0.0740006	0.0829439	0.329142	0.101242	0.0442197	-0.0548346	-0.104858	-0.113794
Q9R112	SQOR	Q9R112_SQOR	-0.011588	0.0313952	0.0524159	0.0840643	0.190299	-0.0634092	0.0257376	0.0976108	0.166073	0.0384362	-0.0159576	-0.0424568	-0.0262051	0.138814	-0.0709665	-0.131313	-0.0380063	0.0186342	0.101715	0.71801	0.955539	0.228863	0.0557052	-0.0578632	-0.096392
P62073	TIMM10	P62073_TIMM10	0.0172093	-0.00723157	-0.0262051	0.0551957	0.0579701	-0.0484122	-0.046921	-0.0800879	-0.0203404	0.121679	0.0496308	0.0243197	0.0342157	-0.0558912	-0.0724828	-0.00868224	0.0648829	0.0370307	0.380446	0.61359	0.827571	0.998693	-0.0519099	0.0292268	0.00918536
P30416	FKBP4	P30416_FKBP4	-0.0969617	-0.0203404	-0.0380063	-0.0985055	-0.139236	-0.0144996	-0.147202	-0.109359	-0.136062	0.0621217	-0.0424568	0.0635029	-0.100051	-0.166503	-0.139236	-0.158429	-0.166503	-0.131313	0.0925933	0.589501	0.864673	0.188174	-0.068578	0.0250272	-0.0813485
M0QWP1	AGRN	M0QWP1_AGRN	0.0690147	-0.0306192	0.00575927	-0.0159576	0.0229004	0.0257376	-0.027675	-0.0513992	-0.0394883	0.0071955	-0.046921	-0.0513992	0.0200577	-0.0380063	0.0867838	-0.00433459	0.144046	0.041243	0.0431672	0.813934	0.645494	0.175081	-0.0225758	-0.0329071	0.0691126
Q8BFZ9	ERLIN2	Q8BFZ9_ERLIN2	0.051024	-0.0454314	-0.00578235	-0.013043	-0.0454314	-0.018878	-0.0291463	-0.0664274	-0.0694519	-0.0380063	-0.0649175	-0.00868224	-0.0846703	-0.131313	0.0854247	-0.0306192	0.107018	0.0086303	0.0139008	0.374529	0.133545	0.357194	-0.0360187	-0.0555048	0.0564402
P28474	ADH5	P28474_ADH5	0.0299829	-0.0320936	-0.0394883	0.0593553	0.0342157	-0.0499049	0.00144197	-0.07552	-0.027675	0.0949116	-0.018878	0.0114956	0.0285692	-0.110916	-0.101598	-0.100051	0.0214797	0.0881416	0.878854	0.86412	0.999658	0.885492	-0.0266197	0.0125509	-0.0382303
Q61739	ITGA6	Q61739_ITGA6	0.0384362	0.0468403	0.0440443	0.0071955	0.0496308	0.309176	0.0579701	0.22404	0.107018	0.0229004	0.0922074	0.0989585	0.332278	0.154454	0.175045	0.207893	0.306845	0.189034	0.0788917	0.186629	0.238062	0.0316503	0.0657777	0.0577183	0.157223
Q8BK64	AHSA1	Q8BK64_AHSA1	0.0271541	-0.0218044	-0.0320936	-0.00578235	-0.0159576	0.187768	0.0881416	-0.00578235	-0.0499049	0.226509	0.116365	0.27262	0.119024	-0.0800879	0	0.0200577	0.112367	0.0648829	0.199832	0.767272	0.101866	0.71057	0.00801102	0.132817	0.0562637
Q9D7J9	ECHDC3	Q9D7J9_ECHDC3	-0.0101344	0.0551957	-0.0247367	0.129613	0.14274	-0.0335695	-0.0588937	-0.0320936	-0.0380063	-0.00723157	-0.0174171	-0.0634092	-0.107803	-0.0740006	-0.0664274	-0.0954196	0.0731347	0.0143553	0.30366	0.697318	0.158789	0.531988	-0.0561002	-0.0859398	-0.0485667
Q61937	NPM1	Q61937_NPM1	-0.0203404	0.0086303	0.0299829	-0.0816138	-0.00288828	0.0229004	-0.0892673	0.0496308	-0.0232698	0.0114956	-0.0394883	-0.129734	-0.027675	-0.00578235	0.0538064	-0.00433459	-0.0573917	-0.0144996	0.755489	0.992683	0.845231	0.983102	0.00296677	-0.02182	-0.00356204
O08759	UBE3A	O08759_UBE3A	-0.00433459	-0.00433459	-0.0144996	-0.0365259	0.0071955	0.0172093	0.015783	-0.00433459	0	0.0426443	0.00288251	-0.0573917	-0.00868224	0.0440443	0.0271541	-0.0203404	0.0662614	-0.013043	0.561781	0.571263	0.650967	0.386765	0.0166126	0.0122996	0.0164726
Q9CR16	PPID	Q9CR16_PPID	-0.0262051	-0.0232698	-0.0101344	-0.018878	-0.0409718	0.0440443	-0.0543923	-0.0320936	-0.046921	0.0648829	0.077243	0.0172093	-0.0846703	-0.0800879	-0.0247367	-0.0484122	-0.0877334	-0.0985055	0.3224	0.994299	0.893817	0.442338	-0.0198979	0.0382832	-0.0469989
Q5SSW2	PSME4	Q5SSW2_PSME4	-0.00868224	-0.0320936	-0.0800879	0.0538064	-0.0247367	-0.128156	-0.136062	-0.174621	-0.07552	-0.0394883	-0.114035	-0.0320936	-0.103147	-0.107803	-0.0846703	-0.190997	-0.106249	-0.171368	0.0274051	0.0483066	0.207003	0.0127397	-0.107768	-0.0827591	-0.118421
Q9CVB6	ARPC2	Q9CVB6_ARPC2	0.045443	0.0370307	0.0229004	0.0440443	-0.0724828	0.0690147	-0.0218044	0.0799754	0.0243197	-0.0394883	-0.0350469	-0.110916	0.041243	-0.0800879	0.00432161	0.00575927	-0.00578235	-0.0892673	0.113395	0.856056	0.0722528	0.272882	-0.0162178	-0.0800258	-0.0412679
P98192	GNPAT	P98192_GNPAT	0.0200577	-0.109359	-0.0159576	0.183963	0.126973	-0.0558912	0.00432161	-0.217591	-0.00288828	-0.0454314	-0.136062	-0.121863	-0.132894	0.123004	-0.0846703	-0.166503	-0.0380063	-0.0724828	0.524389	0.836804	0.542075	0.365986	-0.00493833	-0.123913	-0.0806266
Q7TMB8	CYFIP1	Q7TMB8_CYFIP1	0.0328061	0.00288251	0.108357	-0.0831412	-0.0439433	0.164786	0.0894981	0.111031	0.0949116	-0.00578235	0.0440443	0.0129262	0.0551957	0.128293	0.163499	0.159629	0.126973	0.0257376	0.199608	0.34283	0.824671	0.118554	0.0770673	0.0262	0.125457
A0A0R4J081	NDUFAF1	A0A0R4J081_NDUFAF1	-0.0513992	-0.0174171	-0.0513992	-0.00578235	0.0243197	-0.112475	-0.0800879	-0.011588	-0.0101344	-0.0394883	-0.0335695	-0.0877334	-0.0424568	-0.011588	-0.0320936	-0.106249	0.0172093	0.209141	0.54319	0.998053	0.989684	0.590402	0.0228201	-0.00508015	0.026966
Q3TVK3	DNPEP	Q3TVK3_DNPEP	-0.07552	-0.0513992	-0.00868224	-0.0573917	-0.101598	-0.0740006	-0.093879	-0.0619024	-0.0679388	-0.07552	-0.0816138	-0.121863	-0.0694519	-0.136062	-0.0439433	-0.0892673	-0.0649175	-0.0306192	0.0502399	0.196659	0.0328864	0.922335	-0.0196052	-0.0272184	-3.495e-05
Q3ULJ0	GPD1L	Q3ULJ0_GPD1L	-0.0439433	-0.00723157	-0.086201	0.0071955	0.0538064	0.0328061	0.0243197	0.0071955	-0.011588	0.130931	0.15056	0.0143553	0.0482362	-0.018878	0.0538064	0.051024	0.105678	0.15056	0.0186294	0.295497	0.0310195	0.0107065	0.0499071	0.0738236	0.10533
A0A0R4J093	CMPK1	A0A0R4J093_CMPK1	0.0100637	-0.0365259	-0.0306192	0.0384362	0.0299829	0	0.0257376	-0.0969617	-0.0247367	0.0703893	0.0200577	0.0579701	-0.0144996	-0.136062	-0.0320936	-0.0365259	0.0356239	0.0538064	0.969982	0.992206	0.999019	0.989839	0.0102777	0.0303354	0.0120429
Q9CPQ8	ATP5L	Q9CPQ8_ATP5L	-0.0709665	-0.0203404	-0.0144996	0.041243	0.0426443	0.0114956	-0.0484122	0.258217	-0.011588	-0.118727	-0.101598	-0.0306192	-0.0800879	0.27023	0.0648829	0.189034	-0.0664274	0.0662614	0.673589	0.74015	0.999903	0.668114	0.0289156	-0.0626679	0.0829922
P61222	ABCE1	P61222_ABCE1	-0.0394883	-0.0439433	-0.0262051	-0.0291463	-0.0969617	-0.0424568	-0.0846703	-0.110916	-0.0320936	-0.0247367	-0.100051	-0.0724828	-0.114035	-0.131313	-0.0831412	-0.155213	-0.077041	-0.0679388	0.0974884	0.258999	0.0862086	0.062209	-0.050353	-0.0657337	-0.0457738
A0A1B0GR11	TALDO1	A0A1B0GR11_TALDO1	-0.018878	0.0328061	0.0607392	-0.0247367	-0.0543923	-0.0335695	-0.0513992	0.0579701	-0.0499049	0.00575927	0	-0.131313	-0.0247367	-0.07552	0.173767	-0.0365259	-0.00578235	-0.027675	0.347633	0.691294	0.414828	0.980565	-0.056869	-0.0317007	-0.0236927
G3X8R0	REEP5	G3X8R0_REEP5	0.00288251	-0.0634092	0.195348	0.0758749	0.130931	0.158337	0.0370307	-0.0619024	0.0922074	0.172488	0.172488	0.0717627	-0.0785637	0.470927	0.264236	0.157044	0.0935602	-0.00288828	0.619373	0.993692	0.512096	0.775923	0.0528287	0.133109	0.0859234
A0A0R4J0I9	LRP1	A0A0R4J0I9_LRP1	0.0271541	-0.0709665	0.145351	-0.182786	-0.147202	0.0827026	0.0949116	0.121679	-0.0513992	-0.0203404	0.119024	-0.0664274	-0.0159576	0	0.183963	0.10165	0.141433	-0.0454314	0.47273	0.892095	0.974437	0.320457	0.104609	0.0059486	0.143448
O35643	AP1B1	O35643_AP1B1	0.0271541	-0.00868224	0.0271541	0.0342157	-0.00723157	0.0524159	-0.00433459	-0.0394883	-0.0262051	0.045443	-0.0247367	-0.00868224	-0.00288828	-0.0335695	-0.0499049	-0.0262051	-0.00288828	-0.0603973	0.112957	0.451507	0.45386	0.0456049	-0.0343857	-0.0358363	-0.0652091
Q9DB15	MRPL12	Q9DB15_MRPL12	-0.0203404	-0.018878	-0.0380063	0.0482362	0.0468403	-0.0558912	-0.110916	0.00432161	-0.0174171	0.121679	0.107018	0	0.0621217	-0.00868224	0.0607392	-0.00288828	0.0908534	0.202888	0.0548565	0.935774	0.328101	0.118643	0.0021921	0.0817309	0.0954055
A3KMP2	TTC38	A3KMP2_TTC38	0.0129262	-0.027675	-0.027675	0.0786098	0.0071955	0.015783	0.0342157	-0.0424568	-0.00723157	0.0299829	0.0356239	-0.0513992	-0.0218044	-0.118727	-0.106249	-0.118727	0.00432161	0.0071955	0.366786	0.993113	0.664473	0.27576	0.0145699	-0.01443	-0.0435893
P97351	RPS3A	P97351_RPS3A	-0.107803	-0.0923402	0.100305	-0.0709665	-0.0877334	0.0565835	-0.018878	-0.195946	-0.0923402	-0.0409718	-0.0740006	-0.00868224	-0.0985055	0.00144197	-0.0306192	-0.0649175	-0.120294	-0.168123	0.720903	0.924985	0.999982	0.635327	-0.00608005	0.0406815	-0.0109524
Q9CQH3	NDUFB5	Q9CQH3_NDUFB5	-0.0892673	0.015783	-0.0247367	0.0243197	0.0799754	-0.0573917	-0.00868224	0.0071955	0.169925	-0.0159576	0.0172093	-0.093879	-0.0409718	0.328836	0.0648829	0.0172093	0.0840643	-0.171368	0.846861	0.806258	0.799958	0.993141	0.0116724	-0.0114807	0.045523
Q921F2	TARDBP	Q921F2_TARDBP	-0.0634092	0.0086303	-0.0247367	-0.0709665	-0.0350469	-0.101598	-0.0203404	0.041243	-0.027675	-0.011588	0.0129262	-0.011588	0.0440443	-0.0603973	0.0813396	-0.0159576	0.0243197	0.0524159	0.109385	0.977657	0.543102	0.0713761	0.0163979	0.0324849	0.0824408
P54731	FAF1	P54731_FAF1	-0.0218044	0.0285692	-0.0159576	-0.0484122	-0.0558912	0.00288251	-0.046921	0.0114956	0.0071955	-0.0409718	-0.0203404	-0.0439433	-0.0499049	-0.013043	0.00432161	-0.0232698	-0.0306192	-0.0144996	0.616164	0.998978	0.540657	0.999415	0.0217635	-0.0220908	-3.7e-06
P55302	LRPAP1	P55302_LRPAP1	-0.0528949	-0.0365259	0.0356239	-0.0619024	0.015783	0.0717627	-0.0218044	0.0200577	-0.0424568	-0.0291463	0.0100637	-0.011588	-0.077041	-0.0740006	-0.0232698	-0.0394883	0.0243197	-0.0499049	0.351337	0.388979	0.984567	0.989503	0.0604934	0.0155641	0.0133313
O35206	COL15A1	O35206_COL15A1	0.0342157	0.0299829	0.0071955	-0.0101344	0.0229004	-0.0232698	-0.0664274	-0.00578235	-0.018878	-0.0892673	0.0717627	-0.093879	0.0129262	0.00432161	0.138814	0.0538064	0.0342157	0.0271541	0.0852488	0.614074	0.603439	0.39096	-0.0374672	-0.0142676	0.0254218
B7ZNL2	NAP1L4	B7ZNL2_NAP1L4	0.00575927	-0.0247367	-0.013043	-0.0174171	-0.013043	-0.0424568	-0.0634092	-0.027675	-0.0409718	0.0071955	-0.0218044	-0.100051	0.00575927	-0.137648	-0.0499049	-0.0619024	0.0229004	0.015783	0.550036	0.701945	0.437899	0.994006	-0.0257418	-0.00657435	-0.0018309
A0A087WQ31	CLASP1	A0A087WQ31_CLASP1	-0.0306192	0.0356239	0.00575927	-0.0439433	-0.115597	-0.0424568	-0.0969617	-0.131313	-0.0558912	-0.110916	-0.0558912	-0.190997	-0.179515	-0.0439433	-0.0439433	-0.117161	0.015783	-0.161653	0.0841666	0.135181	0.0362817	0.256341	-0.0845317	-0.098486	-0.0681222
P97429	ANXA4	P97429_ANXA4	-0.0409718	-0.112475	0.0908534	-0.168123	-0.137648	0.121679	-0.0424568	-0.0969617	-0.0740006	-0.101598	0.045443	-0.212568	-0.123434	0.200379	0.178874	0.0690147	0.0881416	-0.0424568	0.411819	0.997631	0.989962	0.32348	0.0027228	-0.0248746	0.155302
Q8BMK4	CKAP4	Q8BMK4_CKAP4	-0.00868224	-0.0969617	0.171207	0.0200577	0.235114	0.326537	0.191563	0.177599	0.0813396	0.0717627	0.235114	0.0867838	0	0.585924	0.246104	0.323082	0.304511	0.182692	0.153128	0.197564	0.219356	0.0832285	0.185875	0.0810961	0.26962
Q3V384	AFG1L	Q3V384_AFG1L	0.0426443	-0.00868224	0.0086303	0.0813396	0.0881416	-0.132894	-0.046921	-0.0954196	-0.0144996	0.0071955	-0.0619024	-0.0247367	-0.0528949	-0.0424568	-0.0291463	-0.0144996	0.0607392	-0.00433459	0.215193	0.163219	0.207333	0.805074	-0.0725583	-0.0680941	-0.0350544
A0A140LIU4	COX7A1	A0A140LIU4_COX7A1	0.0086303	0.0496308	-0.077041	0.0593553	0.0342157	-0.199255	-0.117161	0.0200577	-0.0232698	-0.0513992	-0.112475	0.0881416	0.0229004	-0.0603973	-0.209228	-0.153607	-0.0846703	0.0186342	0.29014	0.52358	0.890756	0.172825	-0.0524003	-0.0805297	-0.148269
E9QAU4	ETL4	E9QAU4_ETL4	0.0285692	-0.00578235	-0.0816138	-0.0350469	0.0271541	-0.0694519	-0.0679388	-0.086201	-0.0218044	-0.0513992	-0.00578235	-0.121863	-0.0454314	-0.0816138	0.0703893	-0.0954196	-0.0306192	0.0200577	0.479192	0.883955	0.571933	0.956655	-0.0475242	-0.0309846	0.0151339
Q9CU62	SMC1A	Q9CU62_SMC1A	-0.0262051	0.0607392	0.144046	-0.109359	-0.0588937	0.0243197	-0.00578235	0.158337	0.0370307	-0.0740006	0.0214797	-0.145605	-0.027675	0.0676387	0.159629	0.130931	0.0538064	0.0114956	0.261897	0.989753	0.725913	0.510756	0.00705265	-0.0449421	0.0751016
Q9CX34	SUGT1	Q9CX34_SUGT1	-0.0218044	0.00144197	-0.00433459	-0.0424568	-0.0144996	-0.00288828	-0.0634092	-0.027675	-0.0306192	0.0172093	0.0186342	-0.0740006	-0.0454314	-0.0558912	0.0676387	0.0468403	0.0214797	0.0398403	0.00776019	0.889928	0.888123	0.0260072	-0.0146055	-0.0323619	0.0564098
P35123	USP4	P35123_USP4	-0.152003	-0.0588937	-0.0800879	-0.103147	-0.140826	-0.0923402	-0.125006	-0.110916	-0.121863	-0.182786	-0.152003	-0.0846703	-0.15682	-0.158429	-0.0409718	-0.0664274	-0.115597	-0.137648	0.118146	0.737857	0.139675	0.972682	-0.0302455	-0.0652025	0.00060525
Q00897	SERPINA1D	Q00897_SERPINA1D	-0.00868224	0.0690147	0.0813396	-0.115597	-0.129734	0.0482362	0.243669	-0.0954196	-0.00144342	-0.0101344	0.111031	0.249749	0.0271541	-0.212568	-0.104697	0.0593553	-0.148801	-0.209228	0.511676	0.999718	0.982538	0.561638	-0.0316096	-0.00301213	-0.156915
P62932	FBXO40	P62932_FBXO40	-0.0365259	-0.0144996	-0.0709665	0.0328061	0.0342157	-0.0664274	-0.07552	-0.0892673	-0.0262051	-0.00868224	-0.0634092	-0.103147	-0.115597	0.0186342	-0.117161	-0.0831412	-0.00868224	-0.0101344	0.787059	0.853582	0.681038	0.706026	-0.0409146	-0.0378964	-0.021125
P10605	CTSB	P10605_CTSB	0.123004	0.0114956	0.0482362	0.175045	0.194087	-0.0831412	0.108357	-0.0232698	0.0129262	0.164786	-0.00433459	-0.0634092	0.0172093	-0.0785637	-0.110916	-0.184425	-0.0159576	-0.07552	0.0647535	0.771965	0.414961	0.0304443	-0.0726939	-0.0899547	-0.178838
Q569Z6	THRAP3	Q569Z6_THRAP3	-0.0543923	-0.0101344	0.0799754	-0.100051	-0.0454314	-0.077041	-0.125006	0.0172093	-0.0603973	-0.0454314	-0.0306192	-0.186065	-0.0159576	0.0496308	0.137504	0.041243	0.0440443	-0.00144342	0.125972	0.765631	0.910523	0.312107	-0.028134	0.00164415	0.074907
Q9JIF7	COPB1	Q9JIF7_COPB1	-0.0101344	0	0.108357	-0.0709665	-0.077041	0.0799754	-0.0232698	0.0745054	-0.013043	-0.00433459	0.0229004	-0.0484122	-0.0262051	0.0100637	0.051024	0.045443	0.0827026	-0.0380063	0.721939	0.999961	0.950965	0.818459	-0.0079758	0.00073261	0.0533007
Q8R001	MAPRE2	Q8R001_MAPRE2	0.015783	-0.0144996	-0.077041	0.0257376	-0.0335695	-0.0558912	-0.0785637	-0.0203404	-0.0954196	-0.0335695	-0.0664274	-0.192645	-0.0218044	-0.0969617	-0.0543923	-0.0619024	0.00432161	0.0894981	0.1725	0.510404	0.190308	0.99587	-0.0565329	-0.0670691	-0.025677
P21278	GNA11	P21278_GNA11	0.0100637	-0.0174171	0.0758749	-0.104697	0.0440443	0.132248	0.123004	0.0745054	0.113701	-0.00144342	0.115033	0.0172093	0.116365	0.358396	0.244887	0.129613	0.175045	0.10165	0.0921672	0.231154	0.121229	0.0457013	0.117378	0.11871	0.156006
Q6P8X1	SNX6	Q6P8X1_SNX6	0.0565835	-0.013043	0.077243	-0.0877334	-0.00288828	0.0786098	0.0717627	0.116365	0.0538064	0.045443	0.0854247	-0.0380063	0.0086303	-0.0320936	0.210389	0.151859	0.123004	0.0565835	0.0246864	0.377242	0.997671	0.0205976	0.0499924	-0.01314	0.115661
Q9CR21	NDUFAB1	Q9CR21_NDUFAB1	0.0908534	0.00144197	-0.0380063	0.151859	0.227741	-0.0694519	0.0551957	0.24732	0.107018	0.0962619	-0.0247367	0.267835	0.238787	0.100305	0.00144197	0.168642	0.123004	0.217851	0.691721	0.736745	0.542505	0.646482	0.0608703	0.0541573	0.0996753
Q9CXT8	PMPCB	Q9CXT8_PMPCB	0.00432161	0.00144197	-0.0320936	0.10165	0.0935602	-0.0954196	0.0114956	-0.0603973	-0.0218044	0.0827026	0.0482362	0.015783	-0.027675	-0.07552	-0.0954196	-0.0985055	0.129613	0.119024	0.929207	0.873025	0.995268	0.999455	-0.0246862	0.0129012	0.00892041
Q8R086	SUOX	Q8R086_SUOX	0.045443	-0.0394883	-0.0543923	0.0935602	-0.0174171	-0.07552	0.0299829	-0.215915	-0.086201	0.123004	0.0086303	0.111031	0.0551957	-0.192645	-0.0603973	-0.0634092	0.0745054	0.0086303	0.43972	0.429973	0.997221	0.97661	-0.0784973	0.0522184	-0.0288609
Q91V92	ACLY	Q91V92_ACLY	-0.347399	-0.046921	0.46048	-0.492079	-0.210897	0.206643	0.488515	0.499782	-0.103147	-0.279284	0.173767	0.409255	-0.013043	-0.155213	1.42653	0.652601	0.353888	-0.305788	0.248514	0.666248	0.941251	0.147601	0.403803	0.184117	0.700404
Q921S7	MRPL37	Q921S7_MRPL37	0.0426443	-0.00868224	-0.0218044	0.129613	0.141433	-0.0543923	0.00144197	-0.018878	0.0200577	0.0894981	0.0607392	0.0621217	0.0496308	-0.00723157	0.147958	0.0257376	0.169925	0.337996	0.0620053	0.975272	0.982486	0.0792732	-0.0155391	0.0437582	0.14196
Q3U7R1	ESYT1	Q3U7R1_ESYT1	0.0384362	-0.0892673	0.0908534	-0.0831412	-0.0679388	0.0676387	0.130931	0.051024	-0.0247367	0.015783	0.0370307	0.0468403	0.00575927	0.0867838	0.159629	0.10165	0.126973	-0.0306192	0.31802	0.715177	0.619717	0.164003	0.0733765	0.0593832	0.136664
P25444	RPS2	P25444_RPS2	-0.0634092	0	0.144046	-0.0724828	-0.134477	0.104337	-0.07552	-0.109359	-0.0101344	-0.0664274	0.0398403	-0.0709665	-0.15682	0.0214797	0.0468403	-0.0320936	-0.0954196	-0.166503	0.774867	0.777537	0.761844	0.634569	-0.0438154	-0.0347228	-0.032052
Q9CWJ9	ATIC	Q9CWJ9_ATIC	0.0813396	0.015783	0.0257376	0.0593553	-0.011588	0.0962619	0.102994	-0.046921	0.0426443	0.041243	-0.00144342	0.107018	0.0551957	-0.172994	-0.0247367	0.0243197	0.051024	0.0100637	0.817079	0.994805	0.729879	0.867788	9.785e-05	-0.00130345	-0.0253547
P16015	CA3	P16015_CA3	-0.212568	-0.0350469	0.941858	-1.62149	-0.685014	0.155749	0.624803	0.108357	-0.508403	-0.717857	-0.0484122	0.200379	-0.685014	-1.01159	1.05172	0.0328061	0.186501	-1.41889	0.836582	0.975281	0.950111	0.969291	0.232164	-0.561207	0.233461
P51410	RPL9	P51410_RPL9	-0.0262051	-0.0203404	0.0854247	0.0214797	0.0356239	0.0482362	-0.0846703	-0.0218044	-0.0588937	0.0299829	-0.0101344	-0.0831412	-0.139236	0.0285692	0.0496308	-0.00433459	-0.0454314	-0.0831412	0.686642	0.783145	0.494576	0.742551	-0.022374	-0.010704	-0.0254526
P97478	COQ7	P97478_COQ7	-0.0203404	0.0635029	0.00144197	0.0621217	0.0299829	-0.139236	-0.161653	-0.0365259	0.0143553	-0.120294	-0.0846703	-0.1976	-0.140826	-0.0484122	-0.07552	-0.0528949	-0.150401	-0.0513992	0.0273032	0.147321	0.0104041	0.0681128	-0.0683077	-0.152076	-0.0959893
P50171-2	HSD17B8	P50171-2_HSD17B8	-0.0320936	0.0745054	-0.0306192	0.0648829	0.0621217	0.00144197	-0.0499049	-0.0101344	0.0593553	0.0100637	0.041243	-0.123434	-0.0394883	0.00575927	-0.0262051	-0.0499049	0.0496308	0.136191	0.67459	0.997133	0.665424	0.995243	-0.0156899	-0.0113726	-0.005419
Q8R2K3	SSBP1	Q8R2K3_SSBP1	0.0384362	0.0551957	0.045443	0.0538064	0.0690147	-0.0101344	-0.0409718	-0.027675	0.0524159	0.0908534	0.0426443	-0.00723157	0.00575927	-0.132894	-0.013043	0.00144197	0	0.0356239	0.55156	0.548461	0.401938	0.54206	-0.0597591	-0.0438654	-0.0489037
Q9ESL4-2	MAP3K20	Q9ESL4-2_MAP3K20	0.045443	-0.027675	-0.0101344	0.0100637	0.0398403	-0.0543923	-0.0439433	0.0299829	-0.0380063	0.0426443	-0.0291463	-0.018878	-0.0306192	-0.0499049	-0.0159576	-0.0439433	0.0243197	0.0172093	0.823273	0.807177	0.708072	0.969991	-0.037971	-0.029111	0.0006612
Q8R1B4	EIF3C	Q8R1B4_EIF3C	-0.0543923	-0.018878	0.0114956	-0.0409718	-0.0365259	0.0440443	-0.0908029	-0.0306192	-0.0306192	-0.0144996	-0.0320936	-0.0846703	-0.0892673	0.0229004	0.0593553	-0.018878	-0.0380063	-0.121863	0.978727	0.999363	0.956055	0.998832	-0.0006943	-0.0021687	0.00148275
Q61702	ITIH1	Q61702_ITIH1	0.00288251	0.0172093	0.0621217	-0.018878	-0.202572	-0.0724828	0.172488	-0.0350469	-0.101598	-0.0664274	-0.0232698	0.0313952	-0.093879	-0.152003	-0.131313	-0.00144342	-0.0877334	-0.405451	0.259365	0.749091	0.640473	0.130049	-0.0825287	-0.0764733	-0.119569
Q8C5H8	NADK2	Q8C5H8_NADK2	-0.00288828	0.0100637	-0.0380063	0.00432161	0.0313952	-0.0877334	-0.013043	-0.0232698	0.0328061	-0.0634092	-0.0603973	-0.103147	-0.109359	-0.0499049	0.0271541	-0.0877334	-0.00433459	0.0840643	0.0627088	0.995929	0.0907658	0.968978	-0.0137597	-0.0641259	0.0106931
Q9WU79	PRODH	Q9WU79_PRODH	-0.0409718	-0.0218044	-0.00433459	-0.00144342	0.0328061	-0.0664274	-0.00433459	0.0229004	0.0579701	0.0214797	-0.00288828	0.115033	0.0635029	-0.0513992	-0.186065	-0.0985055	-0.103147	-0.0588937	0.00498752	0.776807	0.391912	0.0442963	0.0359699	0.0345492	-0.0877568
P53994	RAB2A	P53994_RAB2A	0.0200577	0.00575927	0.154454	-0.0892673	-0.205896	0.111031	-0.0649175	-0.0454314	-0.0439433	-0.077041	0.0607392	-0.16004	-0.077041	0.324235	0.0745054	-0.0454314	-0.0724828	-0.189351	0.743487	0.762908	0.999347	0.733787	-0.0583399	-0.0899495	-0.0718656
P70704	ATP8A1	P70704_ATP8A1	-0.0588937	-0.018878	0.0313952	-0.177882	-0.142417	0.119024	-0.0528949	0.0271541	0.0962619	-0.132894	-0.00433459	-0.171368	0.0398403	0.282143	0.121679	0.0496308	0.0840643	0.00288251	0.589915	0.755597	0.806816	0.381881	0.06604	0.0345513	0.105733
P10126	EEF1A1	P10126_EEF1A1	0.0551957	-0.0588937	0.261832	-0.189351	-0.153607	0.328836	0.202888	0.276199	0.0100637	0.206643	0.190299	0.244887	0.178874	0	0.249749	0.297485	0.361768	0.109695	0.237364	0.559075	0.38256	0.116883	0.204737	0.192148	0.275466
Q9Z1J3	NFS1	Q9Z1J3_NFS1	-0.00433459	0.0100637	-0.0218044	0.0328061	0.0370307	-0.0679388	-0.0831412	-0.121863	-0.011588	0.0200577	0.0200577	-0.110916	-0.0985055	-0.106249	-0.0543923	-0.117161	-0.00144342	-0.00578235	0.430278	0.377285	0.305027	0.486296	-0.0708034	-0.10137	-0.0329519
Q9DBB8	DHDH	Q9DBB8_DHDH	-0.0350469	0.0172093	0.0086303	0.0426443	-0.0320936	-0.0694519	-0.0664274	0.051024	-0.0588937	0.0100637	-0.0439433	-0.115597	-0.0306192	-0.0724828	0.0648829	0.0468403	-0.07552	-0.0159576	0.24226	0.43418	0.220807	0.999338	-0.0718135	-0.0568631	0.00252155
Q9JHQ5	LZTFL1	Q9JHQ5_LZTFL1	-0.0424568	-0.0740006	-0.0247367	-0.0619024	-0.121863	-0.046921	-0.0877334	-0.0218044	-0.103147	-0.0291463	-0.018878	-0.120294	-0.137648	-0.163268	-0.132894	-0.109359	-0.0800879	-0.121863	0.283073	0.715022	0.351778	0.167088	-0.0355538	-0.0681144	-0.0634314
Q9CRB6	TPPP3	Q9CRB6_TPPP3	0.0935602	-0.194295	0.390668	-0.481968	-0.411195	0.0593553	0.0827026	0.243669	-0.163268	-0.205896	0.0690147	-0.00288828	-0.0394883	-0.121863	0.0496308	0.102994	0.24123	-0.07552	0.814395	0.999781	0.999633	0.779659	0.109723	0.0108791	0.12668
Q9JK53	PRELP	Q9JK53_PRELP	0.259423	-0.0816138	0.335712	-0.520769	-0.330973	0.125651	0.176323	0.438293	-0.018878	-0.110916	0.222805	-0.231075	-0.0306192	0.0854247	0.366252	0.16221	0.351628	0.0257376	0.550868	0.93911	0.999806	0.486213	0.0367464	-0.119524	0.168014
Q8BTN3	TANGO2	Q8BTN3_TANGO2	0.0468403	0.0468403	-0.0679388	0.0676387	0.0593553	-0.0262051	-0.0439433	-0.115597	-0.0203404	0.0648829	0.00144197	-0.0649175	-0.0380063	-0.101598	-0.0262051	0.0143553	0.0745054	0.0840643	0.281107	0.442502	0.466964	0.978026	-0.0730454	-0.0848466	-0.00240995
Q91WU5	AS3MT	Q91WU5_AS3MT	-0.0101344	0.00288251	-0.0484122	0	0.00432161	-0.0543923	-0.0291463	-0.093879	-0.0291463	0.0299829	-0.0513992	-0.0528949	0.0313952	-0.0499049	0.00432161	-0.0350469	0	-0.0159576	0.560546	0.518484	0.993395	0.999344	-0.0240791	-0.0448377	-0.0029116
Q61247	SERPINF2	Q61247_SERPINF2	-0.0365259	0.0840643	0.0881416	-0.103147	-0.0335695	0.0565835	0.397255	0.0593553	0.0370307	0.172488	0.128293	0.202888	0.0962619	-0.136062	0.0200577	0.0662614	-0.179515	-0.26708	0.211136	0.634456	0.706873	0.648542	0.0328143	0.104524	-0.103498
P00405	MTCO2	P00405_MTCO2	-0.0144996	-0.00868224	0.015783	0.00575927	0.140124	0.0496308	0.0894981	0.0731347	0.190299	0.0285692	0.0607392	-0.00288828	0.119024	0.539035	0.182692	0.0482362	0.123004	0.0299829	0.394953	0.453169	0.228547	0.58052	0.0909596	0.0622007	0.0870816
Q6P9R2	OXSR1	Q6P9R2_OXSR1	-0.0174171	0.0086303	-0.027675	-0.0320936	-0.0985055	-0.0306192	-0.0816138	-0.0619024	-0.0439433	-0.0232698	-0.093879	-0.139236	-0.0649175	-0.132894	-0.0247367	-0.140826	-0.0513992	-0.0484122	0.0853077	0.221935	0.0338394	0.21495	-0.0393563	-0.071333	-0.0273596
Q8C605	PFKP	Q8C605_PFKP	-0.00433459	-0.0291463	0.10165	0.0565835	0.0717627	0.121679	0.0758749	0.169925	0.0894981	0.130931	0.0894981	0.00288251	0.0813396	0.0565835	0.180148	0.205393	0.0989585	-0.013043	0.236622	0.221059	0.643466	0.1639	0.0633736	0.0552151	0.113429
Q64521	GPD2	Q64521_GPD2	-0.200913	-0.0203404	0.379621	-0.109359	0.0243197	0.0129262	0.185232	0.243669	0.0949116	-0.0969617	-0.0664274	0.129613	0.189034	-0.107803	0.463622	0.141433	0.0229004	-0.134477	0.70655	0.768624	0.999992	0.741671	0.159761	-0.0015777	0.147016
E9Q0N0	ITSN1	E9Q0N0_ITSN1	-0.0634092	-0.0232698	-0.00288828	-0.0724828	-0.0694519	0.0071955	-0.0409718	0.123004	-0.086201	-0.0454314	-0.0439433	-0.0649175	-0.0679388	0.0143553	0.0114956	0.0271541	-0.0380063	-0.150401	0.880333	0.849377	0.999987	0.999736	0.0023677	-0.0020919	0.0300842
P47809	MAP2K4	P47809_MAP2K4	0.0524159	0.00432161	0.015783	0.100305	0.0482362	-0.0892673	0.00288251	0.0229004	0.0071955	0.0285692	-0.0831412	0.0426443	0.015783	-0.0603973	-0.0985055	-0.169745	0.0114956	0.0370307	0.236344	0.597736	0.456295	0.112945	-0.026904	-0.0183165	-0.0776044
A0A1Y7VJN6	IGHG3	A0A1Y7VJN6_IGHG3	0.280956	-0.246395	-0.181149	0.045443	-0.506353	-0.181149	-0.0513992	-0.0709665	-0.438307	-0.841663	-0.753896	0.503858	-0.177882	-0.293359	-0.535332	-0.54372	0.207893	-0.246395	0.670766	0.685414	0.51895	0.640668	-0.113296	-0.225506	-0.323011
Q5M8N4	SDR39U1	Q5M8N4_SDR39U1	-0.00868224	0.0717627	-0.00578235	-0.0203404	0.0398403	-0.0619024	-0.0439433	0	-0.0144996	-0.0335695	0.0370307	-0.0513992	-0.0694519	0.0200577	-0.0394883	0.0398403	-0.0528949	0.00144197	0.759727	0.701414	0.623724	0.800507	-0.0072673	-0.0263372	-0.0117909
P60766	CDC42	P60766_CDC42	0.0426443	-0.00868224	0.159629	-0.0320936	-0.013043	0.215368	0.117695	0.105678	0.138814	0.121679	0.189034	0.051024	0.147958	0.556797	0.286881	0.217851	0.269033	0.197865	0.110701	0.70706	0.12861	0.0853066	0.100714	0.130977	0.226461
A0A1L1STC6	SYNE1	A0A1L1STC6_SYNE1	0.0271541	-0.027675	0.0648829	-0.0619024	0.0114956	0.0676387	0.0356239	0.0703893	0	-0.0218044	-0.027675	-0.0816138	0.0200577	0.121679	0.112367	0.0384362	0.0949116	0.0143553	0.309808	0.641646	0.999946	0.270509	0.0358843	-0.021544	0.0669343
Q60668	HNRNPD	Q60668_HNRNPD	-0.0528949	-0.011588	-0.0350469	-0.0365259	-0.00868224	-0.0365259	-0.00144342	0.0745054	-0.0439433	0.0342157	-0.013043	-0.120294	0.0635029	0.00432161	0.077243	0.00575927	0.0524159	0.0962619	0.102389	0.672178	0.732541	0.0481613	0.0271042	0.040108	0.100616
Q8C0L9	GPCPD1	Q8C0L9_GPCPD1	-0.0513992	-0.00144342	-0.00578235	0.0635029	0.0731347	0.015783	0.0440443	-0.00288828	0.105678	0.077243	0.0565835	0.219091	0.0745054	-0.011588	-0.0513992	0.0086303	0.0731347	0.00288251	0.191289	0.535506	0.142343	0.996353	0.0476572	0.0781183	0.00936929
E9Q7G0	NUMA1	E9Q7G0_NUMA1	-0.00288828	-0.018878	0.051024	-0.00723157	0.0071955	-0.018878	-0.0335695	0.0243197	-0.077041	-0.0350469	0	-0.118727	-0.0335695	-0.0159576	0.0635029	-0.00868224	0.0285692	-0.0424568	0.261533	0.688149	0.258926	0.996669	-0.0138181	-0.0285096	0.0150034
A0A0A6YXW6	IGHA	A0A0A6YXW6_IGHA	-0.461959	-0.595097	-0.378944	0.789103	-0.448115	-1.36216	-0.118727	-0.234465	-1.08009	-0.962969	0.0384362	-0.657445	-0.694321	-0.0619024	-0.736966	-0.924125	-0.422752	-0.870387	0.373316	0.338512	0.669494	0.256984	-0.0276635	-0.236993	-0.383225
Q8R050	GSPT1	Q8R050_GSPT1	0.0328061	-0.0335695	0.0114956	0.0086303	-0.0380063	0.00432161	0.0143553	0.0482362	-0.0291463	0.0731347	-0.0320936	0.0384362	-0.0291463	-0.0846703	-0.0203404	0.00575927	0	0.00575927	0.978228	0.99555	0.946876	0.988944	-0.00574134	-0.0392093	-0.00718332
Q921U8-2	SMTN	Q921U8-2_SMTN	-0.0394883	0.0922074	0.0922074	-0.153607	-0.265345	0.181421	0.109695	0.173767	-0.0320936	0.0468403	0.197865	0.0186342	-0.046921	-0.0785637	0.228973	0.0186342	0.0229004	-0.332789	0.965817	0.976641	0.986081	0.998853	0.0833355	-0.00772535	-0.00559225
Q99L45	EIF2S2	Q99L45_EIF2S2	0.0758749	0.0243197	0.0384362	0.0524159	0.0214797	0.0468403	0.0579701	0.0071955	-0.0232698	0.137504	0.0342157	0.041243	0.0214797	-0.0573917	0.0229004	0.015783	0.00432161	0.0285692	0.737016	0.691085	0.944993	0.630523	-0.0239463	-0.0112103	-0.0260843
Q8BLF1	NCEH1	Q8BLF1_NCEH1	0.041243	-0.0306192	0.123004	0.0949116	0.172488	0.153157	0.138814	-0.0306192	0.163499	0.237564	0.164786	0.0786098	0.0482362	0.446786	0.128293	0.145351	0.190299	0.120352	0.284456	0.688046	0.148712	0.481403	0.0850797	0.0967087	0.0687447
Q9CRB8	MTFP1	Q9CRB8_MTFP1	0.015783	0.0114956	-0.00288828	0.00432161	0.0271541	-0.200913	-0.118727	-0.12658	-0.011588	-0.120294	-0.139236	-0.158429	-0.14401	0.00144197	-0.0679388	-0.205896	-0.0985055	-0.118727	0.0540423	0.129777	0.0448266	0.038036	-0.126636	-0.147145	-0.116525
Q91VC3	EIF4A3	Q91VC3_EIF4A3	-0.00578235	0.0426443	0.0621217	-0.0573917	0.0398403	0.0172093	-0.027675	0.0690147	0.00144197	-0.018878	-0.00723157	-0.0846703	-0.0394883	-0.0394883	0.105678	0.0129262	-0.00723157	-0.0499049	0.229552	0.978951	0.311858	0.997315	-0.00122168	-0.0579193	-0.0155837
A2A7S7	YARS	A2A7S7_YARS	0.0468403	0.0071955	0.0071955	0.0200577	0.0214797	0.041243	-0.018878	-0.00288828	-0.00433459	0.0496308	0.0243197	-0.00868224	-0.027675	-0.0664274	0.0086303	-0.0144996	-0.011588	-0.0424568	0.392875	0.852286	0.447195	0.266272	-0.0165149	-0.0223088	-0.0266704
P83741-3	WNK1	P83741-3_WNK1	-0.0694519	-0.0573917	-0.0291463	-0.0247367	-0.0800879	-0.0320936	-0.086201	-0.0306192	-0.0785637	-0.0203404	-0.0649175	-0.0101344	-0.0649175	-0.106249	-0.0573917	-0.0740006	-0.0454314	-0.123434	0.589734	0.777417	0.960782	0.419748	-0.0352947	-0.0216485	-0.0224271
Q99LY9	NDUFS5	Q99LY9_NDUFS5	-0.00868224	-0.109359	-0.192645	0.0799754	0.154454	-0.249822	-0.0740006	-0.0969617	-0.0603973	0.0551957	-0.0709665	0.0143553	0.0524159	0.00288251	-0.0380063	-0.0543923	0.0731347	-0.046921	0.637166	0.998899	0.630038	0.889986	-0.01498	0.0733759	0.016557
P23492	PNP	P23492_PNP	0.0356239	-0.0543923	0.0840643	-0.0380063	-0.155213	0.265437	0.157044	0.0214797	0.197865	0.015783	-0.0908029	0.195348	0.0299829	-0.131313	-0.0513992	0.0799754	-0.0409718	-0.139236	0.425158	0.566172	0.999961	0.914841	0.158235	0.0169742	-0.0449943
Q9JKR6	HYOU1	Q9JKR6_HYOU1	-0.0232698	0.00432161	0.0370307	-0.0846703	-0.0439433	0.126973	0.0114956	0.0854247	0.00432161	-0.0203404	-0.013043	0.120352	0.0468403	-0.0740006	0.0949116	0.0551957	0.0881416	-0.0232698	0.446806	0.472347	0.839048	0.308879	0.0209697	-0.00356891	0.0811427
Q9CQV8	YWHAB	Q9CQV8_YWHAB	-0.0101344	-0.011588	0.0384362	-0.0499049	-0.0101344	0.0313952	-0.00868224	-0.011588	0.0243197	0.0086303	0.0229004	-0.0800879	0.0143553	-0.101598	0.124328	0.051024	0.0662614	-0.0291463	0.129256	0.949661	0.877909	0.201185	0.00217896	0.0194915	0.0695039
Q9D1H6	NDUFAF4	Q9D1H6_NDUFAF4	0	0.0257376	0.0867838	-0.0923402	-0.0232698	0.0840643	0.00144197	0.0071955	0.134878	0.0758749	0.257011	-0.0247367	0.0813396	0.462576	0.0745054	0.0894981	0.108357	0.126973	0.185539	0.933284	0.116321	0.517057	-0.0056733	0.0684708	0.0860588
Q00519	XDH	Q00519_XDH	0.0538064	0.0579701	0.0426443	-0.0320936	0.0271541	-0.0877334	0.0370307	-0.0203404	0.0922074	0.0243197	0.0538064	-0.0573917	-0.0649175	0.10165	0.119024	0.0440443	0.0621217	0.0731347	0.361531	0.904462	0.92449	0.581482	-0.0210712	-0.0239057	0.0194028
Q9QZF2	GPC1	Q9QZF2_GPC1	-0.0144996	-0.147202	0.0908534	-0.0800879	-0.0528949	-0.0365259	0.0398403	-0.0262051	-0.046921	-0.0439433	0.0285692	-0.0603973	0.00432161	0.260628	-0.00578235	-0.0203404	0.0328061	0.0129262	0.5689	0.991078	0.439799	0.821808	0.0107679	0.0516154	0.0508657
P62814	ATP6V1B2	P62814_ATP6V1B2	0.015783	-0.011588	0.0468403	0.0086303	-0.027675	0.0384362	0.0214797	0.0621217	0.0271541	0	-0.0424568	0.0356239	0.121679	-0.0394883	0.105678	0.0662614	0.0384362	0.0482362	0.345924	0.976467	1	0.287892	0.0149475	-0.0122066	0.0450422
O89020	AFM	O89020_AFM	-0.0291463	-0.0439433	0.0648829	-0.117161	-0.239566	-0.192645	0.164786	-0.123434	-0.104697	-0.14401	0.0086303	-0.174621	-0.24127	-0.199255	-0.195946	-0.086201	-0.210897	-0.288065	0.224796	0.687186	0.290736	0.130756	-0.0868892	-0.138076	-0.166877
Q9CQ54	NDUFC2	Q9CQ54_NDUFC2	-0.0694519	0.0186342	-0.018878	0.0635029	0.0758749	-0.0380063	-0.0335695	0.0384362	0.104337	-0.018878	0.0356239	-0.00433459	0.0370307	0.347099	0.0129262	0.0370307	-0.0247367	-0.205896	0.376244	0.942936	0.531401	0.880283	0.0385581	0.0357458	-0.00578335
Q7TSH2	PHKB	Q7TSH2_PHKB	-0.0380063	0.0143553	0.0621217	-0.0831412	-0.0740006	-0.0218044	-0.0831412	-0.0499049	0.00432161	-0.0923402	-0.0365259	-0.0394883	-0.110916	0.0086303	-0.0262051	-0.190997	-0.120294	-0.210897	0.0471629	0.71594	0.560788	0.0214868	-0.0380794	-0.0276628	-0.14382
Q91YQ5	RPN1	Q91YQ5_RPN1	-0.00868224	-0.086201	0.180148	-0.0603973	-0.0350469	0.144046	0.0229004	-0.0262051	0.015783	-0.0454314	0.0370307	-0.0394883	-0.0679388	0.212881	0.0468403	0.0071955	0.0229004	-0.086201	0.973927	0.983174	0.993239	0.998399	0.0503228	-0.00494853	0.0495877
Q99NF7	PPM1B	Q99NF7_PPM1B	0.0186342	-0.0394883	0.0257376	0.0398403	-0.027675	0.015783	-0.0144996	0.0086303	0.0172093	-0.0543923	-0.00433459	-0.0588937	-0.0679388	0.0976108	-0.00288828	0	0.0086303	-0.0218044	0.782757	0.955721	0.614613	0.915685	-0.0135556	-0.0765782	-0.02363
Q5IRJ6-2	SLC30A9	Q5IRJ6-2_SLC30A9	-0.0203404	0.0313952	0.0468403	-0.0513992	0.0143553	-0.0306192	-0.07552	-0.0159576	0.0827026	-0.0664274	-0.0424568	-0.176251	-0.0588937	0.364012	-0.0159576	-0.0679388	0.0114956	-0.114035	0.920549	0.999557	0.99998	0.890246	-0.021485	-0.0644211	-0.0474756
Q3UMT1	PPP1R12C	Q3UMT1_PPP1R12C	-0.027675	-0.0144996	-0.0262051	-0.136062	-0.00288828	0.0676387	-0.0365259	0.214125	0.0229004	-0.0101344	0.077243	-0.0335695	0.0356239	0.0356239	0.0989585	0.0894981	0.0676387	0.0370307	0.0691964	0.0726235	0.257769	0.0400833	0.0498405	0.062564	0.105508
P08752	GNAI2	P08752_GNAI2	0.041243	-0.0144996	0.111031	-0.0588937	0.0524159	0.21661	0.0989585	0.124328	0.130931	0.0648829	0.191563	-0.0144996	0.107018	0.473008	0.237564	0.157044	0.231432	0.123004	0.204728	0.397841	0.180428	0.131668	0.110956	0.0936463	0.180866
Q8R0N6	ADHFE1	Q8R0N6_ADHFE1	-0.0664274	0.0482362	-0.0203404	0.0635029	0.126973	0.0398403	-0.018878	0.0551957	0.120352	0.0867838	0.0607392	-0.0649175	0.0398403	0.0370307	0.144046	0.0731347	0.119024	0.186501	0.0402011	0.322242	0.836958	0.0209048	0.0412478	0.0258924	0.117587
Q91W50	CSDE1	Q91W50_CSDE1	-0.0603973	-0.0484122	-0.0424568	-0.0558912	-0.027675	-0.0619024	-0.112475	-0.0573917	-0.0634092	-0.0306192	-0.0694519	-0.0969617	-0.166503	-0.131313	-0.0528949	-0.100051	-0.181149	-0.121863	0.143569	0.933997	0.241455	0.118272	-0.0097507	-0.04481	-0.0588053
Q8BJS4	SUN2	Q8BJS4_SUN2	-0.0816138	-0.0291463	0.189034	-0.00868224	0.136191	0.146655	0.120352	0.0551957	0.116365	0.0496308	0.112367	0.153157	0.0745054	0.334568	0.240009	0.141433	0.157044	0.166073	0.0951083	0.252426	0.106422	0.0514475	0.139266	0.131281	0.180473
Q059P4	FILIP1	Q059P4_FILIP1	-0.0232698	0.0243197	-0.0409718	-0.0232698	0.0186342	0.0524159	-0.0335695	-0.0247367	-0.00433459	0.0100637	-0.0724828	-0.00433459	-0.0101344	-0.0573917	-0.018878	-0.0174171	-0.0380063	-0.0409718	0.414397	0.718658	0.900679	0.869631	0.0189352	0.0131354	-0.00517235
Q61187	TSG101	Q61187_TSG101	-0.0679388	-0.0365259	0.00432161	-0.0985055	-0.0800879	0.0299829	-0.0800879	0.00288251	-0.0513992	-0.132894	-0.00288828	-0.150401	-0.153607	-0.018878	0.0551957	-0.0291463	-0.0439433	-0.077041	0.338405	0.96775	0.576835	0.858526	0.00083315	-0.0806617	0.0156875
Q60676	PPP5C	Q60676_PPP5C	-0.00868224	-0.0409718	-0.0558912	-0.027675	-0.0588937	-0.0484122	-0.018878	-0.0573917	-0.0603973	0.0342157	-0.0218044	-0.0159576	-0.018878	-0.0785637	-0.0306192	-0.0335695	-0.0144996	-0.0247367	0.355789	0.686696	0.776901	0.951132	-0.0230683	0.0154454	0.00664545
Q3V3R4	ITGA1	Q3V3R4_ITGA1	-0.0513992	0.00144197	0.0731347	-0.0694519	0.0285692	0.104337	-0.0350469	-0.0203404	0.051024	-0.109359	0.100305	-0.0877334	-0.0528949	0.382944	0.250962	0.112367	0.121679	0.0635029	0.395509	0.938881	0.816481	0.244352	0.0535478	-0.0279163	0.142002
Q9D6S7	MRRF	Q9D6S7_MRRF	-0.013043	0.0356239	0.0114956	0.124328	0.153157	0.015783	0.0114956	-0.181149	0.0398403	-0.0499049	0.0370307	-0.118727	-0.0892673	-0.0424568	-0.0291463	-0.0892673	-0.0528949	-0.07552	0.219324	0.869132	0.221573	0.196883	-0.00777675	-0.0734646	-0.0877672
A2AIX1	SEC16A	A2AIX1_SEC16A	-0.0513992	-0.00578235	0.0313952	-0.086201	-0.12658	-0.0159576	-0.0908029	0.0384362	-0.0101344	-0.101598	-0.0409718	-0.0954196	-0.0969617	-0.0262051	0.0086303	-0.0588937	-0.00433459	-0.07552	0.553349	0.960498	0.437061	0.998393	0.0126332	-0.0668288	-0.00302337
D3Z3G6	MAPK3	D3Z3G6_MAPK3	0.0935602	0.0299829	0.105678	-0.0101344	0.0285692	0.0662614	0.041243	0.0922074	0.0285692	0.00288251	0.0648829	-0.110916	-0.0350469	0.00575927	0.172488	0.0676387	0.0922074	-0.00288828	0.104362	0.999418	0.199717	0.823313	-0.0205285	-0.058889	0.0181515
Q8VE38	OXNAD1	Q8VE38_OXNAD1	0.0881416	0.0356239	-0.0320936	0.195348	0.207893	-0.0969617	0.0786098	-0.00288828	0.0676387	0.0593553	0.0186342	0.0468403	-0.00144342	-0.0350469	-0.239566	-0.202572	0.00144197	-0.0101344	0.0672135	0.975829	0.737776	0.0436967	0.00575595	-0.0432485	-0.168236
P47199	CRYZ	P47199_CRYZ	0	0.0551957	0.0440443	-0.0724828	-0.0619024	-0.077041	-0.0603973	-0.0335695	-0.027675	-0.0816138	0.0143553	-0.148801	-0.101598	-0.0649175	0.10165	0.0214797	-0.0454314	-0.0247367	0.0592318	0.261253	0.0811367	0.995766	-0.0824195	-0.103636	-0.0236506
Q61543	GLG1	Q61543_GLG1	0.0186342	-0.00144342	0.119024	-0.011588	0.0384362	0.077243	0.0229004	0.0949116	0.0799754	0.0143553	0.0827026	0.466758	0.360645	0.459432	0.202888	0.166073	0.23634	0.545968	0.0302296	0.974556	0.0567893	0.0593558	0.0686476	0.35205	0.211019
P13634	CA1	P13634_CA1	-0.00868224	0.0922074	0.111031	0.123004	-0.275786	0.731183	0.589763	0.0607392	0.530071	-0.249822	-0.2567	0.41684	0.306845	-0.171368	-0.109359	0.248535	-0.153607	-0.358454	0.241252	0.501324	0.971966	0.76411	0.428452	-0.272987	-0.233102
Q9WV55	VAPA	Q9WV55_VAPA	0.0482362	-0.00288828	0.0786098	-0.0159576	0.0935602	0.121679	0.147958	0.0908534	0.0949116	0.144046	0.183963	0.0827026	0.126973	0.477159	0.238787	0.21661	0.222805	0.115033	0.0426062	0.411542	0.0310216	0.0472612	0.0722376	0.121372	0.197034
E0CYV0	PCMT1	E0CYV0_PCMT1	0.045443	0.0299829	-0.0262051	0.10165	0.0827026	-0.0350469	0.0143553	-0.00144342	0.00144197	0.0676387	-0.00433459	-0.00868224	0.0703893	0.125651	-0.0619024	0.0827026	0.0342157	0.0786098	0.750584	0.826366	0.972422	0.998916	-0.036271	0.0299258	0.0186998
Q9CZJ2	HSPA12B	Q9CZJ2_HSPA12B	0.0813396	0.0271541	-0.0439433	-0.0218044	0.0243197	-0.0365259	0.041243	-0.0232698	-0.0232698	0.0922074	0.0579701	-0.0740006	0.0114956	0.0243197	0.0894981	0.015783	0.0840643	0.0579701	0.275177	0.944081	0.966845	0.337533	-0.0259446	0.0216449	0.0683423
A0A0R4IZY0	THOP1	A0A0R4IZY0_THOP1	-0.0232698	0.00432161	0.0285692	-0.0232698	0.0214797	-0.046921	-0.0649175	0.0440443	0.0468403	-0.0439433	-0.0634092	-0.086201	-0.0800879	-0.0785637	0.00575927	-0.0409718	0.0384362	0	0.0172126	0.997376	0.0322559	0.996169	0.0309538	-0.0690896	0.0123537
Q60714	SLC27A1	Q60714_SLC27A1	-0.0365259	-0.00723157	0.0745054	0.015783	0.0551957	-0.0218044	-0.018878	-0.0247367	0.0758749	-0.0424568	-0.0144996	-0.136062	-0.086201	0.305679	0.199123	0.0356239	0.0690147	0.0976108	0.521757	0.999992	0.999408	0.497114	-0.0231537	-0.0467325	0.079037
Q06185	ATP5I	Q06185_ATP5I	-0.0335695	-0.0740006	-0.0740006	0.0384362	0.0114956	-0.200913	-0.0573917	-0.0484122	-0.0679388	-0.166503	-0.0543923	-0.187707	-0.128156	0.0621217	-0.168123	-0.174621	-0.168123	-0.0800879	0.245691	0.803467	0.520235	0.129213	-0.00360665	-0.0743709	-0.114338
P32921	WARS	P32921_WARS	-0.0218044	0.00432161	0.0313952	0.136191	-0.0320936	-0.0174171	-0.0291463	-0.0528949	0.0538064	0.0440443	-0.027675	-0.0603973	-0.0892673	-0.0394883	-0.0709665	-0.00433459	-0.00578235	0.00432161	0.214473	0.291906	0.114701	0.282237	-0.0470047	-0.0573467	-0.0229169
Q3UHB1	NT5DC3	Q3UHB1_NT5DC3	0.0398403	0.0426443	-0.00144342	0.0881416	0.112367	0.077243	-0.011588	0.0186342	0.0922074	-0.0101344	-0.00578235	-0.0619024	-0.0159576	0.0257376	-0.0800879	-0.0439433	-0.013043	0.0328061	0.0265426	0.903627	0.166622	0.0973659	0.0360007	-0.0513767	-0.0697355
G5E924	HNRNPL	G5E924_HNRNPL	-0.00433459	-0.00288828	0.0356239	-0.0306192	-0.0454314	-0.027675	-0.018878	0.125651	0.0172093	0.0496308	0.0731347	-0.086201	0.051024	0.0908534	0.175045	0.136191	0.108357	0.104337	0.0180218	0.982689	0.650607	0.013077	-0.0152666	0.0546354	0.125885
Q8C483	SARS	Q8C483_SARS	0.0214797	0.00144197	0.045443	0.0356239	0.0313952	0.0172093	0.041243	0.00288251	0.0143553	0.141433	0.0257376	0.0143553	0.041243	-0.0831412	0.0799754	0.0565835	0.147958	0.10165	0.119064	0.99772	0.999827	0.131629	-0.0113425	-0.0028142	0.0622609
Q91V41	RAB14	Q91V41_RAB14	0.0356239	-0.0232698	0.112367	-0.077041	-0.077041	0.136191	0.0758749	0.0129262	0.0894981	0.0827026	0.157044	0.0908534	0.123004	0.465713	0.145351	0.0827026	0.0551957	0.0071955	0.124742	0.921474	0.0747613	0.755781	0.0696978	0.116827	0.0627721
Q5SS83	FLOT2	Q5SS83_FLOT2	-0.0634092	0.051024	0.133564	-0.0649175	0.0881416	0.172488	-0.011588	0.115033	0.113701	-0.027675	0.153157	-0.0846703	0.0313952	0.57918	0.293959	0.226509	0.185232	0.217851	0.296553	0.76742	0.549497	0.156426	0.119894	0.0375878	0.228373
Q9CQZ6	NDUFB3	Q9CQZ6_NDUFB3	-0.110916	-0.0306192	-0.0954196	0.0200577	0.00288251	-0.181149	-0.15682	-0.018878	-0.0365259	0.0186342	-0.117161	-0.117161	-0.0740006	0.0285692	-0.186065	-0.142417	-0.139236	-0.360305	0.0481398	0.943749	0.999961	0.0468216	0.0264935	-0.0109812	-0.101222
Q91WS0	CISD1	Q91WS0_CISD1	0.0200577	-0.018878	0.0426443	-0.0291463	-0.100051	-0.0320936	-0.0499049	-0.139236	-0.0664274	-0.0513992	-0.0439433	-0.0846703	-0.0262051	0.151859	-0.0573917	-0.129734	-0.0528949	-0.0969617	0.100832	0.142869	0.965688	0.129638	-0.0670173	-0.0445332	-0.0777666
Q8BH61	F13A1	Q8BH61_F13A1	0.0717627	-0.0528949	0.0989585	-0.0709665	-0.0954196	0.24123	0.194087	0.117695	0.0285692	0.159629	0.124328	0.186501	0.146655	0.0071955	0.172488	0.227741	0.205393	0.0114956	0.256148	0.461161	0.258365	0.152285	0.108261	0.137221	0.179507
Q91YP2	NLN	Q91YP2_NLN	-0.103147	0.0243197	0.045443	-0.00288828	-0.0380063	-0.0954196	-0.137648	0.0200577	0.0551957	-0.110916	-0.0954196	-0.242977	-0.174621	-0.0588937	-0.0558912	-0.0291463	-0.018878	-0.0320936	0.0457632	0.827987	0.0292279	0.90378	-0.048722	-0.121632	-0.0413357
P60335	PCBP1	P60335_PCBP1	0.015783	-0.0101344	0.00144197	0.0271541	-0.0218044	-0.046921	-0.0513992	-0.0262051	0	0.0949116	0.0384362	0.0384362	0.0976108	-0.0634092	0.0071955	0.0086303	0.0482362	0.0922074	0.0662824	0.410953	0.520422	0.60532	-0.0348176	0.0298237	0.0198208
F6VW30	YWHAQ	F6VW30_YWHAQ	0.0114956	-0.011588	0.102994	-0.132894	-0.0954196	0.0271541	0.0356239	0.0894981	0.0100637	0.0635029	0.0440443	0.015783	0.0676387	-0.0350469	0.191563	0.0935602	0.140124	0.00288251	0.169484	0.9459	0.759236	0.0995816	0.0272003	0.0440905	0.116888
Q61081	CDC37	Q61081_CDC37	-0.077041	-0.00288828	-0.0247367	-0.0877334	-0.104697	0.0071955	-0.109359	-0.0394883	-0.027675	-0.0664274	-0.013043	-0.0724828	-0.0923402	-0.0831412	0.0100637	-0.0232698	-0.0101344	-0.0350469	0.27497	0.986338	0.829675	0.470973	0.0114006	-0.021594	0.0341868
O35864	COPS5	O35864_COPS5	0.0440443	0.0565835	0.00575927	0.0440443	-0.0159576	0.0313952	-0.027675	-0.0159576	0.0243197	0.0328061	0	-0.077041	-0.0320936	-0.0694519	0.00432161	0.0356239	-0.0603973	-0.0800879	0.0975248	0.357539	0.0593563	0.0979104	-0.0600019	-0.0761379	-0.0720821
Q8BRK8	PRKAA2	Q8BRK8_PRKAA2	-0.0144996	0.0257376	0.0384362	0.0881416	0.0271541	0.051024	-0.0454314	0.0313952	0.0356239	0.0186342	0.0257376	0.0607392	-0.0528949	0.0731347	-0.103147	-0.0694519	0.0172093	0.0328061	0.273555	0.942865	0.982893	0.187319	-0.0006917	-0.0063493	-0.0582082
P70349	HINT1	P70349_HINT1	0.10165	0.125651	0.180148	0.175045	0.250962	0.221568	0.214125	0.0565835	0.191563	0.273814	0.205393	0.0894981	0.214125	0.0731347	0.104337	0.119024	0.0827026	0.0621217	0.198052	0.661512	0.880782	0.520228	0.063777	0.055045	-0.0568282
P15105	GLUL	P15105_GLUL	0.0648829	-0.0679388	-0.0785637	0.00144197	-0.027675	-0.163268	0.077243	-0.155213	-0.234465	-0.147202	0.00288251	-0.0588937	0.045443	-0.118727	-0.00288828	-0.12658	0.0962619	0.0468403	0.417825	0.466456	0.899072	0.970337	-0.121965	-0.0256453	0.0552244
Q9Z1R2	BAG6	Q9Z1R2_BAG6	-0.0603973	0.0384362	0.0214797	-0.0709665	-0.0454314	0.0496308	-0.0892673	0.0313952	0.0342157	-0.0350469	0.0100637	-0.0634092	-0.0954196	-0.0365259	0.104337	0.0703893	-0.0247367	-0.0740006	0.479015	0.970095	0.847225	0.714343	0.050854	-0.0170671	0.0422851
Q80U63	MFN2	Q80U63_MFN2	-0.0174171	-0.00578235	-0.00288828	-0.0664274	-0.14401	-0.027675	-0.140826	-0.046921	-0.027675	-0.0800879	-0.0573917	-0.204233	-0.125006	0.0243197	-0.0785637	-0.129734	-0.120294	-0.172994	0.158259	0.408652	0.274684	0.0720828	-0.0353213	-0.0684882	-0.113414
Q60598	CTTN	Q60598_CTTN	0.00575927	-0.0335695	0.0635029	-0.0528949	-0.0558912	0.0854247	-0.0394883	0.153157	-0.0159576	-0.0291463	0.0129262	-0.12658	0.0551957	-0.103147	0.045443	0.0758749	0.077243	-0.0439433	0.408642	0.86779	0.821411	0.733799	-0.00205248	-0.0152412	0.0745641
P54116	STOM	P54116_STOM	0.0285692	-0.0350469	0.0468403	-0.00723157	-0.147202	0.187768	0.0172093	-0.0985055	0.0285692	-0.114035	-0.07552	0.117695	-0.0247367	0.271426	0.0229004	0.0384362	0.0426443	-0.0785637	0.959368	0.997839	0.969713	0.999989	0.00654049	-0.0354055	0.0199995
Q01730	RSU1	Q01730_RSU1	-0.0306192	-0.00433459	0.0229004	-0.0923402	-0.0740006	0.195348	0.0143553	0.194087	0.0854247	-0.0247367	0.0200577	0.015783	0.207893	-0.0484122	0.0935602	0.180148	0.14274	0.0935602	0.120684	0.193904	0.612582	0.065449	0.102902	0.0332599	0.135627
Q61102	ABCB7	Q61102_ABCB7	-0.00288828	0.0143553	0.0370307	-0.0439433	-0.0101344	0.0200577	-0.0573917	-0.0218044	0.119024	-0.0528949	-0.0232698	-0.109359	-0.0573917	0.424385	0.112367	-0.0424568	0.0676387	0.0313952	0.955449	0.999124	0.952081	0.936847	-0.0158679	-0.0586284	0.0437834
Q8BGQ7	AARS	Q8BGQ7_AARS	0.0690147	0.041243	0.0662614	0.0551957	0.077243	0.112367	0.0786098	0.0468403	0.0922074	0.0976108	0.0100637	0.0579701	0.0299829	-0.00144342	0.0717627	0.0635029	0.0172093	-0.0409718	0.148383	0.626374	0.750057	0.490748	0.0178812	-0.0307456	-0.0203724
A2A5Y6	MAPT	A2A5Y6_MAPT	-0.0218044	0.0384362	-0.0350469	0.116365	0.0935602	-0.0709665	-0.0694519	-0.0694519	-0.07552	0.0370307	-0.0619024	-0.103147	-0.0409718	-0.0877334	-0.0528949	-0.0262051	0.0621217	0.115033	0.24942	0.40513	0.269892	1	-0.0777678	-0.0702183	0.0096424
P49442	INPP1	P49442_INPP1	0.015783	0.0186342	0.0086303	-0.00433459	0	0.0565835	-0.027675	0.0114956	0.0384362	-0.013043	0.0285692	-0.018878	-0.0174171	-0.0528949	0.0214797	0.0468403	0.0398403	0.0313952	0.0571162	0.963866	0.339127	0.354098	-0.00071105	-0.0296238	0.0234111
O88441	MTX2	O88441_MTX2	0.0214797	-0.046921	-0.107803	0.0071955	-0.018878	-0.171368	-0.0724828	-0.120294	-0.0634092	0.00288251	-0.0724828	-0.110916	-0.046921	-0.136062	-0.166503	-0.137648	-0.104697	-0.0679388	0.18732	0.293889	0.541989	0.0922724	-0.0526201	-0.0526201	-0.10131
P55096	ABCD3	P55096_ABCD3	-0.011588	-0.142417	0.117695	0.100305	0.00432161	-0.0558912	-0.0409718	-0.244685	-0.0291463	0.00288251	-0.0394883	0.00288251	-0.179515	0.286881	-0.0380063	-0.16004	-0.0892673	-0.207561	0.303481	0.577072	0.999997	0.288569	-0.0853303	-0.041476	-0.169012
G5E814	NDUFA11	G5E814_NDUFA11	0.077243	-0.0619024	-0.22095	0.204141	0.221568	-0.253257	0.0551957	-0.0528949	-0.100051	0.149259	-0.109359	0.0635029	0.0607392	-0.0218044	0.0186342	0.0468403	0.180148	0.0313952	0.779665	0.9855	0.979505	0.822261	-0.0605652	0.0530689	0.0314475
G3X928	SEC23IP	G3X928_SEC23IP	0	-0.0203404	0.0440443	-0.07552	-0.086201	0.00144197	-0.0320936	0.0285692	-0.0619024	0.0071955	-0.0203404	-0.0603973	0.0200577	-0.0409718	-0.0159576	0.0229004	0.0690147	-0.013043	0.458747	0.873234	0.992989	0.65534	-0.0219234	-0.0101702	0.0150989
Q3U741	DDX17	Q3U741_DDX17	0.0468403	0.0384362	0.0482362	-0.0365259	0.015783	-0.0320936	0.0243197	-0.00723157	-0.0335695	0.051024	0.0114956	-0.013043	-0.00723157	0.0143553	0.10165	-0.00433459	0.0551957	0.0468403	0.136742	0.406684	0.888797	0.580996	-0.0498698	-0.0311427	0.00837975
Q8K2C6	SIRT5	Q8K2C6_SIRT5	-0.011588	0.00432161	-0.0892673	0.0524159	0.0840643	-0.132894	-0.0908029	-0.0247367	-0.0101344	-0.046921	-0.0499049	-0.0694519	-0.0558912	-0.0484122	-0.100051	-0.0954196	-0.0679388	0.107018	0.832315	0.914643	0.676359	0.887833	-0.0211035	-0.0462717	-0.078046
P17427	AP2A2	P17427_AP2A2	0.0100637	-0.00578235	0.0243197	-0.0409718	-0.0558912	0	0.0370307	-0.00578235	-0.0159576	-0.0262051	0.0186342	-0.0513992	-0.0513992	0.0313952	0.0299829	-0.0218044	-0.0320936	-0.0846703	0.808852	0.993746	0.917099	0.685868	-0.00792303	-0.0283458	-0.0290897
P26262	KLKB1	P26262_KLKB1	-0.0262051	-0.0409718	0.0384362	-0.0846703	-0.184425	-0.107803	0.282143	-0.0365259	-0.0694519	-0.194295	-0.100051	-0.0320936	-0.177882	-0.200913	-0.150401	-0.0101344	-0.293359	-0.345564	0.156926	0.999825	0.427182	0.176843	-0.0358634	-0.144294	-0.188292
P82198	TGFBI	P82198_TGFBI	0.0935602	-0.0232698	0.194087	-0.248108	-0.150401	0.100305	0.0482362	0.190299	-0.103147	-0.0800879	0.0496308	-0.232769	-0.0831412	-0.0679388	0.117695	0.0908534	0.108357	-0.15682	0.578767	0.997987	0.683847	0.967196	0.013091	-0.115233	0.06446
Q91XH5	SPR	Q91XH5_SPR	-0.0262051	0.0496308	-0.0306192	0.0071955	0.00288251	0.041243	0.0271541	0.0172093	0.0143553	0.0621217	0.0962619	0.0565835	-0.0101344	-0.046921	0.0143553	0.0370307	0.015783	0.0313952	0.638195	0.737343	0.45224	0.663104	0.0267141	0.0660883	0.0330939
Q05BC3-3	EML1	Q05BC3-3_EML1	-0.013043	0.0854247	0.0313952	0.0370307	-0.0634092	0.0426443	-0.0439433	0	0.0186342	-0.0454314	0.0538064	-0.0877334	-0.171368	-0.0877334	0.0243197	-0.046921	-0.077041	-0.112475	0.0902575	0.553311	0.0536629	0.128096	-0.0342129	-0.121946	-0.096194
P40124	CAP1	P40124_CAP1	0.0551957	0.0440443	0.221568	0.0229004	-0.0247367	0.750178	0.283329	0.652601	0.422233	0.0922074	0.0827026	0.331132	0.748461	0.113701	0.176323	0.555816	0.540027	0.285698	0.233362	0.147107	0.532707	0.225604	0.372613	0.064081	0.363243
Q3U422	NDUFV3	Q3U422_NDUFV3	0.00432161	0.0143553	-0.0424568	0.0703893	0.102994	-0.00868224	-0.0380063	0.0100637	0.045443	0.100305	0.0662614	0.0243197	0.0243197	0.0229004	0.0257376	0.0827026	0.0690147	0.041243	0.426306	0.962238	0.458485	0.364431	0.000725245	0.0149812	0.0457904
Q6PD31	TRAK1	Q6PD31_TRAK1	-0.093879	-0.0484122	-0.0558912	-0.0262051	-0.0365259	-0.100051	-0.118727	-0.0709665	-0.0218044	-0.0232698	-0.077041	-0.107803	-0.0923402	-0.0985055	-0.0969617	-0.115597	-0.0831412	-0.0513992	0.597869	0.873882	0.593388	0.444323	-0.0188148	-0.0401885	-0.0378998
Q61584	FXR1	Q61584_FXR1	0.0356239	-0.0394883	-0.0101344	0.0894981	0.0538064	-0.0603973	-0.0335695	-0.0649175	-0.120294	0.116365	-0.0484122	0.0214797	-0.0394883	-0.0969617	-0.1976	-0.14401	-0.0439433	-0.109359	0.0497578	0.38495	0.864382	0.0262734	-0.0731421	-0.052233	-0.139429
Q9WUZ7	SH3BGR	Q9WUZ7_SH3BGR	0.0243197	0.0881416	-0.0218044	0.015783	0.045443	0.0328061	-0.0573917	-0.0558912	-0.0144996	0.0908534	0.10165	-0.0174171	-0.0144996	-0.0634092	0.0635029	0.0676387	0.0214797	0.0935602	0.296527	0.610353	0.993693	0.67302	-0.0345509	-0.0345509	0.0455195
E9PV45	USP24	E9PV45_USP24	-0.0709665	0	0.0440443	-0.07552	-0.0664274	0.0143553	-0.0800879	-0.00433459	0	-0.093879	-0.0232698	-0.0892673	0.105678	0.0758749	0.0243197	0.0200577	-0.0218044	0.0854247	0.593483	0.999951	0.927905	0.522373	0.0311487	0.0122135	0.0576719
Q99N96	MRPL1	Q99N96_MRPL1	-0.0203404	-0.027675	-0.0144996	0.0496308	0.0676387	-0.0335695	-0.117161	-0.0439433	-0.00578235	0.0200577	0.0799754	-0.100051	-0.0664274	-0.0499049	0.0468403	0	0.0129262	0.104337	0.351553	0.880395	0.918416	0.590839	-0.0161495	-0.0324849	0.0473033
Q9DAR7	DCPS	Q9DAR7_DCPS	-0.106249	0.0524159	0.00144197	-0.0985055	-0.0513992	-0.0380063	-0.0816138	0.0799754	-0.0101344	-0.011588	0.0524159	-0.1976	-0.0634092	0.00432161	0.181421	0.051024	-0.0877334	-0.0558912	0.7205	0.982172	0.999422	0.668237	0.0105255	0.0369438	0.0460982
Q924B0	IMPA1	Q924B0_IMPA1	-0.027675	-0.0306192	0.0100637	-0.0816138	-0.107803	0.0257376	0.0100637	-0.0365259	-0.00723157	0.00575927	0.0172093	0.00432161	0.0524159	-0.100051	0.00288251	0.0398403	0.0271541	-0.0365259	0.610819	0.981675	0.70077	0.491994	0.0219155	0.0349064	0.0441654
A6H611	MIPEP	A6H611_MIPEP	-0.0159576	0.0565835	-0.0335695	0.0214797	0.041243	-0.0394883	0.0370307	0.0342157	0.0676387	-0.00433459	0.0384362	-0.0528949	-0.0306192	0.0285692	0.0214797	-0.0320936	-0.00288828	0.0370307	0.600786	0.739508	0.940684	0.999918	0.0342696	-0.00709564	0.00653466
P99027	RPLP2	P99027_RPLP2	-0.0335695	0.0129262	0.0186342	0.015783	-0.018878	-0.0247367	-0.101598	-0.027675	-0.0320936	0.0962619	0.0398403	-0.00723157	0.0071955	-0.046921	-0.0247367	-0.018878	0.0482362	-0.00144342	0.149955	0.249343	0.898916	0.999301	-0.0420296	-0.0071591	-0.0245153
P19324	SERPINH1	P19324_SERPINH1	0.0593553	-0.0424568	0.0468403	0.00144197	-0.0694519	0.137504	0.0071955	-0.0694519	-0.109359	0.137504	0.0100637	0.123004	-0.0144996	-0.186065	0.0328061	-0.0785637	0.00288251	-0.106249	0.801696	0.882943	0.999962	0.758683	-0.093593	-0.0140774	-0.0619817
P05132	PRKACA	P05132_PRKACA	0.166073	0.0257376	0.0703893	0.222805	0.238787	0.111031	0.146655	-0.0394883	-0.00723157	0.163499	0.0786098	-0.0969617	-0.0218044	0.217851	0.0745054	-0.0513992	-0.0262051	-0.128156	0.248452	0.94583	0.801289	0.148287	-0.00720015	-0.0396214	-0.157033
Q9QYI3	DNAJC7	Q9QYI3_DNAJC7	-0.00868224	-0.013043	0.00144197	0.00575927	-0.0394883	0.0100637	-0.0603973	-0.0603973	-0.0558912	0.0731347	0.0172093	0.0129262	-0.0320936	-0.106249	0	-0.013043	-0.00868224	0.0172093	0.39831	0.381091	0.9984	0.999443	-0.0522711	0.0165463	-0.000720985
Q99M01	FARS2	Q99M01_FARS2	-0.027675	0.0129262	-0.00868224	0.0200577	0.0482362	-0.0785637	-0.0365259	-0.0831412	0.0100637	-0.0144996	0.0214797	-0.0499049	-0.0424568	-0.0159576	-0.0785637	-0.110916	-0.0320936	-0.0218044	0.244742	0.623701	0.807663	0.125901	-0.0386479	-0.0180796	-0.0574506
Q60631	GRB2	Q60631_GRB2	0.00432161	-0.0218044	-0.0262051	0.0214797	-0.0409718	0.0328061	-0.0740006	0.0482362	-0.0144996	-0.0247367	-0.027675	-0.117161	-0.00433459	-0.0558912	0.0229004	-0.00723157	-0.0724828	0.0186342	0.443629	0.997605	0.375491	0.998156	-0.0057582	-0.0189336	0.0144427
F7A8H6	GPX4	F7A8H6_GPX4	0.0524159	0.0172093	0.0200577	0.0593553	0.0935602	-0.118727	-0.0365259	-0.0335695	-0.0306192	0.0114956	-0.0740006	-0.0740006	-0.0679388	-0.00723157	-0.0588937	-0.120294	-0.00723157	0.0579701	0.243045	0.296401	0.147525	0.26019	-0.0698063	-0.104176	-0.0692994
A0A1L1SSC0	LRRFIP2	A0A1L1SSC0_LRRFIP2	-0.0740006	0.0648829	0.00144197	-0.0588937	-0.0232698	0.0690147	-0.0709665	0.125651	0.0662614	-0.0513992	0.102994	-0.128156	-0.027675	-0.0908029	0.0579701	0.0881416	0.0285692	-0.0350469	0.358767	0.621536	0.938876	0.635955	0.0949873	-0.0226733	0.0719955
Q9D8U8	SNX5	Q9D8U8_SNX5	0.0468403	0.00288251	0	-0.0203404	0.0200577	0.0813396	0.0758749	0.0243197	-0.0203404	0.0854247	0.141433	-0.0218044	0.0071955	-0.07552	0.0976108	0.0370307	0.133564	0.0662614	0.305443	0.780673	0.908022	0.175745	0.0228784	0.00575424	0.0804948
Q8C7X2	EMC1	Q8C7X2_EMC1	-0.0350469	-0.0174171	0.112367	0.0129262	-0.027675	0.10165	-0.0101344	-0.0499049	0.0621217	0.0143553	0.0468403	-0.0409718	-0.086201	0.238787	0.123004	-0.00723157	-0.0499049	-0.152003	0.854584	0.999921	0.987907	0.883368	-0.00788895	0.0166007	-0.0263228
P63094	GNAS	P63094_GNAS	-0.0350469	-0.0528949	0.0468403	-0.0724828	-0.00578235	0.132248	0.0200577	0.0607392	0.0854247	-0.0306192	0.121679	-0.07552	0.112367	0.452068	0.214125	0.14274	0.120352	0.168642	0.166748	0.565142	0.204508	0.0949157	0.10471	0.156338	0.199662
Q61655	DDX19A	Q61655_DDX19A	-0.0101344	0.015783	-0.0203404	-0.027675	-0.07552	-0.013043	-0.07552	-0.011588	-0.0454314	0.0114956	-0.0232698	-0.0724828	-0.0603973	-0.139236	-0.0101344	-0.0634092	-0.0908029	-0.12658	0.240874	0.509743	0.277495	0.133801	-0.030194	-0.0451599	-0.0618687
Q9QYA2	TOMM40	Q9QYA2_TOMM40	-0.0203404	0.00432161	0.0271541	0.00288251	0.0717627	0.0328061	-0.013043	-0.00578235	0.0551957	0.0299829	0.115033	-0.00288828	-0.0247367	0.265437	0.0496308	-0.0247367	0.0468403	0.0257376	0.448314	0.904746	0.294303	0.946473	0.029204	0.0263808	0.0326869
A0A087WR45	PROB1	A0A087WR45_PROB1	-0.0203404	0.0129262	0.0579701	-0.0159576	0.0114956	0.00432161	-0.0144996	0.0799754	0.00575927	-0.0159576	0.0285692	-0.0439433	-0.0439433	0.0676387	0.0496308	0.0285692	-0.0291463	-0.0409718	0.899005	0.97767	0.966127	0.991385	0.00727497	-0.0144419	0.00122715
O88587	COMT	O88587_COMT	0.134878	-0.0513992	-0.0144996	0.136191	0.271426	-0.0232698	0.105678	-0.0740006	0.00575927	0.124328	0.0229004	0.0172093	0.0342157	0.0468403	0.0799754	0.177599	0.191563	0.182692	0.296613	0.999338	0.999964	0.273872	-0.0544299	-0.0259735	0.119956
Q9DBS5	KLC4	Q9DBS5_KLC4	0.00575927	0.0071955	-0.0454314	0.0200577	-0.0499049	0.0243197	-0.0694519	-0.0335695	-0.0513992	-0.0454314	0.0565835	-0.0724828	-0.0846703	-0.171368	-0.00868224	-0.0499049	0.0398403	0.00144197	0.294603	0.67167	0.242522	0.999972	-0.0563823	-0.0789602	-0.0100975
Q99P72	RTN4	Q99P72_RTN4	0.0285692	-0.106249	0.190299	-0.07552	-0.00433459	0.24123	0.116365	0.0229004	0.0579701	0.041243	0.190299	0.0186342	-0.0499049	0.246104	0.197865	0.185232	0.206643	0.0894981	0.261275	0.578159	0.55626	0.125329	0.0814455	0.0647184	0.215024
P21956	MFGE8	P21956_MFGE8	0.204141	0.15056	0.228973	-0.53952	-0.364013	0.339137	0.368489	0.476122	0.0100637	0.207893	0.313826	0.361768	0.361768	0.104337	0.380729	0.295135	0.529071	-0.0709665	0.504311	0.748706	0.405102	0.406338	0.161787	0.136475	0.160582
Q8CI78	RMND1	Q8CI78_RMND1	0.0342157	0.0551957	0.0086303	-0.0144996	0.100305	0.153157	0.0551957	0.00144197	0.153157	0.0370307	0.168642	0.0356239	0.0356239	0.237564	0.10165	0.0285692	0.108357	0.10165	0.29693	0.273614	0.188914	0.39151	0.078882	0.0156077	0.080227
P53702	HCCS	P53702_HCCS	0.0731347	-0.027675	0.0100637	0	-0.00433459	0.0313952	-0.103147	-0.013043	0.0440443	-0.00144342	-0.0484122	-0.0350469	-0.0454314	0.226509	0.0813396	0	0.0200577	0.0285692	0.860471	0.936101	0.999022	0.96846	-0.00936644	-0.0400787	0.0192816
Q9JJL8	SARS2	Q9JJL8_SARS2	-0.0694519	0.0229004	0.0635029	0.0086303	0.0758749	0.0356239	-0.0499049	-0.0588937	0.0524159	0.0257376	0.0881416	0.0100637	0.0186342	0.141433	0.100305	0.0635029	0.0313952	0.0356239	0.338639	0.998313	0.382928	0.408955	0.0198585	0.00997225	0.033798
Q61166	MAPRE1	Q61166_MAPRE1	0.00144197	-0.0174171	0.0299829	-0.0320936	-0.136062	0.0976108	-0.0724828	0.125651	0.0071955	0.0186342	-0.0174171	-0.00723157	0.0827026	-0.0439433	0.0607392	0.0935602	-0.0144996	-0.0543923	0.965829	0.99529	0.99112	0.919141	0.0151831	0.000755995	0.0311074
Q9CQE8	RTRAF	Q9CQE8_RTRAF	-0.00288828	-0.00723157	0.0299829	-0.0144996	-0.0262051	0.0243197	-0.0262051	-0.00578235	-0.0588937	0.0827026	0.0257376	0	0.0328061	-0.0954196	0.0426443	0.00432161	0.0214797	0.0172093	0.520151	0.799577	0.98227	0.818372	-0.0211452	0.0307975	0.0244044
Q9WUK2-2	EIF4H	Q9WUK2-2_EIF4H	-0.0439433	0.0114956	-0.0409718	0.0200577	0.0565835	-0.00144342	-0.0634092	-0.013043	-0.0262051	0.0635029	0.0398403	-0.0218044	0.0717627	-0.0380063	0.0962619	0.00288251	0.0342157	0.0854247	0.131329	0.998242	0.475556	0.107967	0.0016951	0.0545784	0.0745583
Q8BXK9	CLIC5	Q8BXK9_CLIC5	0.0813396	-0.00433459	0.015783	0.0186342	0.137504	0.0935602	0.116365	-0.0306192	0.0786098	0.182692	0.167358	0.176323	0.104337	0.0257376	0.0813396	0.0813396	0.207893	0.175045	0.0688152	0.464727	0.0580079	0.0594056	0.0763516	0.150149	0.110984
Q9D7X8	GGCT	Q9D7X8_GGCT	-0.12658	-0.0365259	-0.0409718	-0.107803	-0.172994	-0.176251	-0.232769	-0.077041	-0.0800879	-0.205896	-0.184425	-0.199255	-0.186065	-0.168123	-0.263612	-0.239566	-0.0985055	-0.0394883	0.135228	0.296909	0.0615844	0.222594	-0.0986066	-0.111678	-0.0946483
Q6PD03	PPP2R5A	Q6PD03_PPP2R5A	-0.0409718	0.0607392	0.0593553	-0.0101344	0.0496308	-0.00144342	0.00432161	0.0922074	0.102994	-0.0291463	0.0086303	-0.086201	-0.0247367	0.147958	0.111031	0.108357	-0.0101344	-0.011588	0.644006	0.806795	0.977953	0.830121	0.0250204	-0.0493471	0.0245008
O09174	AMACR	O09174_AMACR	-0.0218044	-0.0573917	-0.0634092	0.0989585	0.0200577	-0.0484122	-0.0634092	-0.0816138	-0.00868224	0.0229004	-0.0424568	-0.103147	-0.179515	-0.0816138	-0.136062	-0.137648	-0.011588	0.0200577	0.507255	0.897974	0.372909	0.54004	-0.00881415	-0.0420158	-0.034227
A2AEX8	FHL1	A2AEX8_FHL1	0.117695	0.0426443	0.123004	-0.187707	-0.172994	0.211635	0.173767	0.14274	-0.00578235	0.108357	0.298658	0.333424	0.136191	-0.0543923	0.177599	0.0299829	0.257011	0.0071955	0.537241	0.934358	0.375143	0.693652	0.0625703	0.0560213	0.0236213
P13707	GPD1	P13707_GPD1	-0.152003	-0.0409718	0.317304	-0.0831412	-0.100051	0.0426443	0.24123	0.0299829	-0.100051	0.0356239	0.0579701	0.138814	-0.0513992	-0.22095	0.468844	0.0299829	-0.0543923	-0.227692	0.971839	0.999344	0.997949	0.977523	0.0920394	0.0976804	0.0498518
P48774	GSTM5	P48774_GSTM5	0.0172093	0.0384362	0.129613	0.0676387	-0.0892673	-0.018878	0.0243197	0.0356239	0.0813396	-0.0558912	-0.0439433	-0.118727	-0.0634092	0.0703893	0.0271541	0.0200577	0.0186342	0.0086303	0.0825981	0.323921	0.0330351	0.53835	-0.0287178	-0.108929	-0.0336915
Q99KH8	STK24	Q99KH8_STK24	0.015783	0.0299829	0.0524159	-0.027675	0.015783	0.125651	-0.0262051	0.133564	0.0440443	-0.0247367	-0.013043	0.240009	0.209141	0.0086303	0.0867838	0.121679	0.173767	0.288063	0.158966	0.830751	0.560768	0.0803521	0.0211614	-0.0142526	0.12484
Q8BJ71	NUP93	Q8BJ71_NUP93	-0.0101344	-0.00433459	0.0271541	-0.046921	0.00288251	0.0496308	0.0482362	-0.018878	0.0214797	0.045443	0.0607392	-0.0439433	0.0186342	0.0243197	0.16221	0.0551957	0.108357	0.0071955	0.0548397	0.621149	0.61283	0.0239776	0.0287142	0.0315542	0.0890108
A2ABY3	PCYT2	A2ABY3_PCYT2	-0.0454314	-0.00144342	-0.0484122	0.041243	-0.00433459	0.0129262	-0.018878	-0.107803	0	0.149259	0.104337	0.100305	0.0243197	-0.0954196	-0.0619024	-0.011588	0.0538064	0.0271541	0.263721	0.990529	0.285511	0.973064	0.0191028	0.123742	0.0312205
Q8BIJ7	RUFY1	Q8BIJ7_RUFY1	-0.0424568	-0.0709665	-0.077041	-0.0923402	-0.226004	-0.15682	-0.140826	-0.189351	-0.182786	-0.077041	-0.128156	-0.077041	-0.100051	-0.239566	-0.147202	-0.229382	-0.137648	-0.123434	0.021697	0.0100632	0.244406	0.0450301	-0.108782	-0.0260472	-0.0684212
Q9Z0U1	TJP2	Q9Z0U1_TJP2	-0.018878	0.00144197	0.0676387	-0.0649175	-0.0101344	0.168642	-0.00433459	0.205393	0.0758749	-0.018878	-0.0394883	0.0662614	0.115033	-0.0424568	0.125651	0.171207	0.163499	0.128293	0.0292886	0.173162	0.949984	0.0229394	0.0845929	-0.01016	0.154614
Q9WTX5	SKP1	Q9WTX5_SKP1	-0.0380063	-0.0785637	-0.118727	-0.0144996	-0.018878	-0.120294	-0.0694519	-0.0499049	-0.117161	-0.00578235	-0.00723157	-0.0262051	-0.0320936	-0.100051	-0.0740006	-0.0709665	-0.0291463	-0.00723157	0.437691	0.933528	0.604828	0.876108	-0.0111669	0.0320799	0.0082286
Q9DCM0	ETHE1	Q9DCM0_ETHE1	0.0257376	-0.0306192	-0.0740006	0.104337	0.130931	-0.0218044	0.0398403	-0.0694519	0.0607392	0.177599	0.0894981	0.0426443	0.0186342	-0.0409718	-0.131313	-0.0528949	0.0867838	0.159629	0.849873	0.969708	0.74459	0.997842	0.0422811	0.0450851	0.0193852
Q9JLB0	MPP6	Q9JLB0_MPP6	-0.0159576	0.0881416	0.0538064	-0.013043	0.0200577	-0.0218044	0.0071955	0.0976108	0.00288251	-0.0528949	-0.0573917	0.0745054	0.0214797	-0.00144342	0.0129262	-0.0380063	0.0524159	0.107018	0.732267	0.994009	0.705754	0.997725	-0.0131862	-0.0218251	0.0122893
Q8C0M9	ASRGL1	Q8C0M9_ASRGL1	0.0313952	0.0243197	-0.0603973	0.0922074	0.045443	-0.086201	-0.00868224	-0.011588	-0.013043	0.0551957	-0.0218044	-0.0800879	0.00144197	-0.0954196	-0.0409718	-0.0203404	-0.0306192	0.0313952	0.560054	0.601328	0.375364	0.630861	-0.0394454	-0.0496619	-0.0533373
Q8CC86	NAPRT	Q8CC86_NAPRT	0.0565835	0.00144197	-0.0247367	-0.07552	-0.184425	0.0621217	0.0894981	-0.0740006	-0.0306192	-0.046921	0.0384362	0.0426443	-0.0513992	-0.0831412	-0.0174171	-0.0513992	-0.0335695	-0.0740006	0.923119	0.969103	0.99407	0.842246	-0.0189718	-0.0352736	-0.030837
P18572	BSG	P18572_BSG	0.0538064	0.0186342	0.111031	0.0935602	0.181421	0.226509	0.175045	-0.0513992	0.129613	0.183963	0.186501	0.168642	0.113701	0.178874	0.10165	0.0786098	0.124328	0.0908534	0.170057	0.346423	0.0942146	0.843492	0.101362	0.105191	0.0225684
Q3UQ84	TARS2	Q3UQ84_TARS2	-0.00723157	-0.0262051	-0.0203404	0.0214797	0.0538064	-0.110916	-0.0424568	-0.0365259	-0.00723157	-0.0174171	-0.00868224	-0.0573917	-0.112475	0.051024	-0.0785637	-0.101598	-0.00288828	0.0271541	0.87486	0.891773	0.887642	0.756599	-0.0227399	-0.00363112	-0.02694
E9Q1G8	2007-09-01	E9Q1G8_SEPT7	0.0172093	-0.093879	-0.129734	-0.0218044	-0.0985055	-0.0543923	-0.0499049	-0.0350469	-0.166503	-0.00868224	-0.077041	-0.115597	0	-0.140826	0.0200577	-0.00288828	0.0976108	0.0690147	0.0245582	0.866755	0.981384	0.060347	0.0034494	-0.0191993	0.102378
Q9CPU0	GLO1	Q9CPU0_GLO1	0.0538064	0.00575927	0.0524159	0.051024	0.0200577	0.0257376	0.00144197	-0.0409718	0.0468403	0.0922074	0.0100637	0.0607392	0.0440443	-0.101598	-0.120294	-0.0603973	-0.0573917	0.0071955	0.0751141	0.706424	0.886837	0.040765	-0.0316623	-0.00767565	-0.110614
Q9Z2C5	MTM1	Q9Z2C5_MTM1	-0.0365259	0.0313952	-0.0306192	0.0328061	0.041243	-0.107803	-0.0679388	0	0.0229004	-0.00868224	-0.131313	0.041243	0.0200577	0.0129262	0.0172093	-0.0846703	-0.00723157	0.0086303	0.952604	0.891492	0.975181	0.958365	-0.000388	0.0125382	0.000311365
I3ITR1	AK157302	I3ITR1_AK157302	-0.0320936	0.0593553	0.0100637	0.0648829	0.0551957	-0.0484122	-0.132894	-0.0785637	0.00288251	0.00144197	-0.00723157	-0.0724828	-0.0709665	0.0086303	-0.0603973	-0.077041	-0.101598	-0.115597	0.0451873	0.165954	0.293964	0.0164898	-0.0831217	-0.0419411	-0.124029
[truncated: 4,171 more rows]
