# Supplementary material for: Multiomics Analyses Reveal Dynamic Bioenergetic Pathways and Functional Remodeling of the Heart During Intermittent Fasting
Source: bioRxiv preprint, doi:10.1101/2021.03.04.433999, version 2 (2023-05-07)
Supplement: Supplementary Table 4 [file 433999_file23.xlsx]

## Sheet: DEGs from IF12 vs AL
Gene ID	readcount_IF12_HE	readcount_AL_HE	log2FoldChange	pval	padj	Associated Gene Name	genetype	Description
ENSMUSG00000055116	251.882	17.8705	2.4295	6.5244e-58	8.8145e-54	Arntl	protein_coding	aryl hydrocarbon receptor nuclear translocator-like [Source:MGI Symbol;Acc:MGI:1096381]
ENSMUSG00000004098	487.853	195.917	1.2288	6.9581e-53	4.7002e-49	Col5a3	protein_coding	collagen, type V, alpha 3 [Source:MGI Symbol;Acc:MGI:1858212]
ENSMUSG00000025511	284.96	634.414	-1.0606	2.7217e-33	1.2257e-29	Tspan4	protein_coding	tetraspanin 4 [Source:MGI Symbol;Acc:MGI:1928097]
ENSMUSG00000015090	1362.1	3272.08	-1.127	2.3785e-29	8.0332e-26	Ptgds	protein_coding	prostaglandin D2 synthase (brain) [Source:MGI Symbol;Acc:MGI:99261]
ENSMUSG00000037379	158.318	28.121	1.6358	3.9026e-27	1.0545e-23	Spon2	protein_coding	spondin 2, extracellular matrix protein [Source:MGI Symbol;Acc:MGI:1923724]
ENSMUSG00000037411	335.559	1105.09	-1.3753	1.0769e-26	2.4248e-23	Serpine1	protein_coding	serine (or cysteine) peptidase inhibitor, clade E, member 1 [Source:MGI Symbol;Acc:MGI:97608]
ENSMUSG00000029675	975.576	415.366	1.0914	2.9115e-26	5.6192e-23	Eln	protein_coding	elastin [Source:MGI Symbol;Acc:MGI:95317]
ENSMUSG00000038776	655.651	1018.92	-0.61462	4.2357e-26	7.1531e-23	Ephx1	protein_coding	epoxide hydrolase 1, microsomal [Source:MGI Symbol;Acc:MGI:95405]
ENSMUSG00000003949	461.266	1052.48	-1.0375	6.6565e-22	9.9921e-19	Hlf	protein_coding	hepatic leukemia factor [Source:MGI Symbol;Acc:MGI:96108]
ENSMUSG00000029238	570.084	307.436	0.82356	1.0506e-21	1.4194e-18	Clock	protein_coding	circadian locomotor output cycles kaput [Source:MGI Symbol;Acc:MGI:99698]
ENSMUSG00000027217	268.588	135.852	0.88877	3.7362e-21	4.5887e-18	Tspan18	protein_coding	tetraspanin 18 [Source:MGI Symbol;Acc:MGI:1917186]
ENSMUSG00000040675	13.8141	60.9915	-1.4071	9.4705e-21	1.0662e-17	Mthfd1l	protein_coding	methylenetetrahydrofolate dehydrogenase (NADP+ dependent) 1-like [Source:MGI Symbol;Acc:MGI:1924836]
ENSMUSG00000026077	98.8514	26.0916	1.3313	2.1511e-19	2.2355e-16	Npas2	protein_coding	neuronal PAS domain protein 2 [Source:MGI Symbol;Acc:MGI:109232]
ENSMUSG00000027435	1312.81	827.61	0.62869	5.6037e-18	5.4076e-15	Cd93	protein_coding	CD93 antigen [Source:MGI Symbol;Acc:MGI:106664]
ENSMUSG00000046841	652.809	379.54	0.72614	6.7531e-18	6.0823e-15	Ckap4	protein_coding	cytoskeleton-associated protein 4 [Source:MGI Symbol;Acc:MGI:2444926]
ENSMUSG00000012428	953.89	611.29	0.60839	9.8244e-18	8.2955e-15	Steap4	protein_coding	STEAP family member 4 [Source:MGI Symbol;Acc:MGI:1923560]
ENSMUSG00000031502	4892.24	3237.82	0.56873	1.1111e-17	8.8298e-15	Col4a1	protein_coding	collagen, type IV, alpha 1 [Source:MGI Symbol;Acc:MGI:88454]
ENSMUSG00000022389	2017.75	3793.82	-0.81842	4.2745e-17	3.2082e-14	Tef	protein_coding	thyrotroph embryonic factor [Source:MGI Symbol;Acc:MGI:98663]
ENSMUSG00000023905	1187.57	570.35	0.90827	6.5894e-16	4.6854e-13	Tnfrsf12a	protein_coding	tumor necrosis factor receptor superfamily, member 12a [Source:MGI Symbol;Acc:MGI:1351484]
ENSMUSG00000046768	632.955	422.011	0.55841	9.5173e-16	6.4289e-13	Rhoj	protein_coding	ras homolog gene family, member J [Source:MGI Symbol;Acc:MGI:1931551]
ENSMUSG00000029328	1140.11	1558.68	-0.43859	1.1973e-15	7.7028e-13	Hnrnpdl	protein_coding	heterogeneous nuclear ribonucleoprotein D-like [Source:MGI Symbol;Acc:MGI:1355299]
ENSMUSG00000059824	257.332	2175.65	-1.2452	6.3144e-15	3.8776e-12	Dbp	protein_coding	D site albumin promoter binding protein [Source:MGI Symbol;Acc:MGI:94866]
ENSMUSG00000032010	1503.67	2470.13	-0.66218	7.093e-15	4.1663e-12	Usp2	protein_coding	ubiquitin specific peptidase 2 [Source:MGI Symbol;Acc:MGI:1858178]
ENSMUSG00000026043	3143.45	2014.68	0.60013	2.4617e-14	1.3857e-11	Col3a1	protein_coding	collagen, type III, alpha 1 [Source:MGI Symbol;Acc:MGI:88453]
ENSMUSG00000007877	17317.3	48303	-1.0833	2.8874e-14	1.5603e-11	Tcap	protein_coding	titin-cap [Source:MGI Symbol;Acc:MGI:1330233]
ENSMUSG00000056749	304.609	134.366	0.95634	4.9769e-14	2.4903e-11	Nfil3	protein_coding	nuclear factor, interleukin 3, regulated [Source:MGI Symbol;Acc:MGI:109495]
ENSMUSG00000048416	1421.01	2230.04	-0.6068	4.9647e-14	2.4903e-11	Mlf1	protein_coding	myeloid leukemia factor 1 [Source:MGI Symbol;Acc:MGI:1341819]
ENSMUSG00000046562	433.856	278.525	0.5994	5.5815e-14	2.6931e-11	Unc119b	protein_coding	unc-119 homolog B (C. elegans) [Source:MGI Symbol;Acc:MGI:2147162]
ENSMUSG00000044393	1091.68	1516.68	-0.45694	6.2851e-14	2.928e-11	Dsg2	protein_coding	desmoglein 2 [Source:MGI Symbol;Acc:MGI:1196466]
ENSMUSG00000020642	359.229	188.757	0.80542	9.1208e-14	3.8507e-11	Rnf144a	protein_coding	ring finger protein 144A [Source:MGI Symbol;Acc:MGI:1344401]
ENSMUSG00000004105	957.036	1382.14	-0.50676	8.8571e-14	3.8507e-11	Angptl2	protein_coding	angiopoietin-like 2 [Source:MGI Symbol;Acc:MGI:1347002]
ENSMUSG00000038417	823.088	1192.98	-0.51076	8.6092e-14	3.8507e-11	Fig4	protein_coding	FIG4 homolog (S. cerevisiae) [Source:MGI Symbol;Acc:MGI:2143585]
ENSMUSG00000032115	847.842	591.1	0.49836	9.5253e-14	3.8996e-11	Hyou1	protein_coding	hypoxia up-regulated 1 [Source:MGI Symbol;Acc:MGI:108030]
ENSMUSG00000020241	1514.95	1166.43	0.36811	1.2089e-13	4.8038e-11	Col6a2	protein_coding	collagen, type VI, alpha 2 [Source:MGI Symbol;Acc:MGI:88460]
ENSMUSG00000020375	643.448	889.384	-0.44914	2.6987e-13	1.0417e-10	Rufy1	protein_coding	RUN and FYVE domain containing 1 [Source:MGI Symbol;Acc:MGI:2429762]
ENSMUSG00000018167	389.362	635.384	-0.6483	3.0508e-13	1.1449e-10	Stard3	protein_coding	START domain containing 3 [Source:MGI Symbol;Acc:MGI:1929618]
ENSMUSG00000021775	993.923	1992.12	-0.84794	3.3695e-13	1.2303e-10	Nr1d2	protein_coding	nuclear receptor subfamily 1, group D, member 2 [Source:MGI Symbol;Acc:MGI:2449205]
ENSMUSG00000006403	28.4685	4.11204	1.1677	3.7324e-13	1.327e-10	Adamts4	protein_coding	a disintegrin-like and metallopeptidase (reprolysin type) with thrombospondin type 1 motif, 4 [Source:MGI Symbol;Acc:MGI:1339949]
ENSMUSG00000018566	5641.63	7307.19	-0.36408	4.0471e-13	1.3918e-10	Slc2a4	protein_coding	solute carrier family 2 (facilitated glucose transporter), member 4 [Source:MGI Symbol;Acc:MGI:95758]
ENSMUSG00000008035	1289.26	2102.03	-0.64641	4.1208e-13	1.3918e-10	Mid1ip1	protein_coding	Mid1 interacting protein 1 (gastrulation specific G12-like (zebrafish)) [Source:MGI Symbol;Acc:MGI:1915291]
ENSMUSG00000042487	259.71	134.679	0.80955	9.8265e-13	3.2379e-10	Leo1	protein_coding	Leo1, Paf1/RNA polymerase II complex component, homolog (S. cerevisiae) [Source:MGI Symbol;Acc:MGI:2685031]
ENSMUSG00000001119	1292.39	992.926	0.36993	1.3344e-12	4.1926e-10	Col6a1	protein_coding	collagen, type VI, alpha 1 [Source:MGI Symbol;Acc:MGI:88459]
ENSMUSG00000046598	973.443	1813.83	-0.77736	1.3181e-12	4.1926e-10	Bdh1	protein_coding	3-hydroxybutyrate dehydrogenase, type 1 [Source:MGI Symbol;Acc:MGI:1919161]
ENSMUSG00000068742	584.228	826.461	-0.47807	2.0546e-12	6.3087e-10	Cry2	protein_coding	cryptochrome 2 (photolyase-like) [Source:MGI Symbol;Acc:MGI:1270859]
ENSMUSG00000067653	7066.55	4188.03	0.67881	2.3791e-12	7.1425e-10	Ankrd23	protein_coding	ankyrin repeat domain 23 [Source:MGI Symbol;Acc:MGI:1925571]
ENSMUSG00000054477	215.398	347.732	-0.63147	3.7709e-12	1.1075e-09	Kcnn2	protein_coding	potassium intermediate/small conductance calcium-activated channel, subfamily N, member 2 [Source:MGI Symbol;Acc:MGI:2153182]
ENSMUSG00000020684	1420.16	2026.13	-0.48724	4.2598e-12	1.2245e-09	Rasl10b	protein_coding	RAS-like, family 10, member B [Source:MGI Symbol;Acc:MGI:2685575]
ENSMUSG00000025981	457.511	946.261	-0.85578	6.5167e-12	1.8342e-09	Coq10b	protein_coding	coenzyme Q10 homolog B (S. cerevisiae) [Source:MGI Symbol;Acc:MGI:1915126]
ENSMUSG00000026858	1284.41	924.128	0.45338	7.0287e-12	1.9379e-09	Fam73b	protein_coding	family with sequence similarity 73, member B [Source:MGI Symbol;Acc:MGI:1922035]
ENSMUSG00000006386	1057.06	743.967	0.48079	7.5865e-12	2.0499e-09	Tek	protein_coding	endothelial-specific receptor tyrosine kinase [Source:MGI Symbol;Acc:MGI:98664]
ENSMUSG00000043230	20.2402	1.27407	1.0456	9.1375e-12	2.4206e-09	Fam124b	protein_coding	family with sequence similarity 124, member B [Source:MGI Symbol;Acc:MGI:3026880]
ENSMUSG00000062077	2392.95	3060.09	-0.34545	1.0692e-11	2.7779e-09	Trim54	protein_coding	tripartite motif-containing 54 [Source:MGI Symbol;Acc:MGI:1889623]
ENSMUSG00000020641	392.529	192.05	0.84174	1.1337e-11	2.8899e-09	Rsad2	protein_coding	radical S-adenosyl methionine domain containing 2 [Source:MGI Symbol;Acc:MGI:1929628]
ENSMUSG00000041920	269.029	149.885	0.73539	1.2621e-11	3.1576e-09	Slc16a6	protein_coding	solute carrier family 16 (monocarboxylic acid transporters), member 6 [Source:MGI Symbol;Acc:MGI:2144585]
ENSMUSG00000030747	6267.12	8990.92	-0.49257	1.364e-11	3.3504e-09	Dgat2	protein_coding	diacylglycerol O-acyltransferase 2 [Source:MGI Symbol;Acc:MGI:1915050]
ENSMUSG00000031503	3777.82	2717.38	0.45207	5.9114e-11	1.4056e-08	Col4a2	protein_coding	collagen, type IV, alpha 2 [Source:MGI Symbol;Acc:MGI:88455]
ENSMUSG00000028339	1175.96	875.181	0.40916	5.9303e-11	1.4056e-08	Col15a1	protein_coding	collagen, type XV, alpha 1 [Source:MGI Symbol;Acc:MGI:88449]
ENSMUSG00000028878	599.082	823.239	-0.43741	6.3362e-11	1.4759e-08	Fam76a	protein_coding	family with sequence similarity 76, member A [Source:MGI Symbol;Acc:MGI:2385211]
ENSMUSG00000029246	291.274	450.63	-0.57969	7.1215e-11	1.6307e-08	Ppat	protein_coding	phosphoribosyl pyrophosphate amidotransferase [Source:MGI Symbol;Acc:MGI:2387203]
ENSMUSG00000023277	3282.46	2507.88	0.37537	7.7792e-11	1.7516e-08	Twf2	protein_coding	twinfilin, actin-binding protein, homolog 2 (Drosophila) [Source:MGI Symbol;Acc:MGI:1346078]
ENSMUSG00000023805	747.001	1020.19	-0.43074	9.3653e-11	2.0742e-08	Synj2	protein_coding	synaptojanin 2 [Source:MGI Symbol;Acc:MGI:1201671]
ENSMUSG00000044951	1988.54	3569.4	-0.7243	1.1365e-10	2.4764e-08	Mylk4	protein_coding	myosin light chain kinase family, member 4 [Source:MGI Symbol;Acc:MGI:3643758]
ENSMUSG00000023272	351.64	233.138	0.54879	1.1563e-10	2.4797e-08	Creld2	protein_coding	cysteine-rich with EGF-like domains 2 [Source:MGI Symbol;Acc:MGI:1923987]
ENSMUSG00000052485	66.7476	18.85	1.0232	1.3461e-10	2.8416e-08	Tmem171	protein_coding	transmembrane protein 171 [Source:MGI Symbol;Acc:MGI:2685751]
ENSMUSG00000020290	911.904	590.193	0.5754	1.7557e-10	3.6491e-08	Xpo1	protein_coding	exportin 1, CRM1 homolog (yeast) [Source:MGI Symbol;Acc:MGI:2144013]
ENSMUSG00000057342	461.044	313.833	0.51828	1.9513e-10	3.9943e-08	Sphk2	protein_coding	sphingosine kinase 2 [Source:MGI Symbol;Acc:MGI:1861380]
ENSMUSG00000028034	919.952	637.44	0.49777	2.1664e-10	4.3685e-08	Fubp1	protein_coding	far upstream element (FUSE) binding protein 1 [Source:MGI Symbol;Acc:MGI:1196294]
ENSMUSG00000038143	303.292	179.078	0.66545	3.577e-10	7.1066e-08	Stox2	protein_coding	storkhead box 2 [Source:MGI Symbol;Acc:MGI:1918319]
ENSMUSG00000027204	755.709	453.503	0.64768	5.2696e-10	1.0318e-07	Fbn1	protein_coding	fibrillin 1 [Source:MGI Symbol;Acc:MGI:95489]
ENSMUSG00000036461	311.504	210.351	0.52565	5.4225e-10	1.0318e-07	Elf1	protein_coding	E74-like factor 1 [Source:MGI Symbol;Acc:MGI:107180]
ENSMUSG00000030996	2144.05	3011.86	-0.4627	5.3465e-10	1.0318e-07	Art1	protein_coding	ADP-ribosyltransferase 1 [Source:MGI Symbol;Acc:MGI:107511]
ENSMUSG00000020937	307.844	195.761	0.58953	7.0736e-10	1.3273e-07	Plcd3	protein_coding	phospholipase C, delta 3 [Source:MGI Symbol;Acc:MGI:107451]
ENSMUSG00000021460	1653.68	2000.24	-0.26988	7.9994e-10	1.4804e-07	Auh	protein_coding	AU RNA binding protein/enoyl-coenzyme A hydratase [Source:MGI Symbol;Acc:MGI:1338011]
ENSMUSG00000029641	43.8308	15.6903	0.94569	8.261e-10	1.5082e-07	Rasl11a	protein_coding	RAS-like, family 11, member A [Source:MGI Symbol;Acc:MGI:1916145]
ENSMUSG00000001506	1715.02	1270.22	0.41238	1.2262e-09	2.2088e-07	Col1a1	protein_coding	collagen, type I, alpha 1 [Source:MGI Symbol;Acc:MGI:88467]
ENSMUSG00000001027	235.158	431.032	-0.72692	1.7753e-09	3.1558e-07	Scn4a	protein_coding	sodium channel, voltage-gated, type IV, alpha [Source:MGI Symbol;Acc:MGI:98250]
ENSMUSG00000020846	855.396	530.709	0.61161	1.8693e-09	3.2797e-07	Fam101b	protein_coding	family with sequence similarity 101, member B [Source:MGI Symbol;Acc:MGI:1923816]
ENSMUSG00000006221	29840.5	37977.8	-0.33696	2.1354e-09	3.6986e-07	Hspb7	protein_coding	heat shock protein family, member 7 (cardiovascular) [Source:MGI Symbol;Acc:MGI:1352494]
ENSMUSG00000032575	862.3	593.773	0.50064	2.4522e-09	4.1936e-07	Manf	protein_coding	mesencephalic astrocyte-derived neurotrophic factor [Source:MGI Symbol;Acc:MGI:1922090]
ENSMUSG00000039982	194.701	96.9274	0.78417	3.1131e-09	5.2572e-07	Dtx4	protein_coding	deltex 4 homolog (Drosophila) [Source:MGI Symbol;Acc:MGI:2672905]
ENSMUSG00000025823	526.272	376.659	0.4556	4.0806e-09	6.806e-07	Pdia4	protein_coding	protein disulfide isomerase associated 4 [Source:MGI Symbol;Acc:MGI:104864]
ENSMUSG00000003477	383.019	616.747	-0.60689	4.2422e-09	6.9893e-07	Inmt	protein_coding	indolethylamine N-methyltransferase [Source:MGI Symbol;Acc:MGI:102963]
ENSMUSG00000037926	1317.37	1029.34	0.34357	4.5312e-09	7.3755e-07	Ssh2	protein_coding	slingshot homolog 2 (Drosophila) [Source:MGI Symbol;Acc:MGI:2679255]
ENSMUSG00000022951	1648.18	1061.33	0.57024	4.6273e-09	7.4422e-07	Rcan1	protein_coding	regulator of calcineurin 1 [Source:MGI Symbol;Acc:MGI:1890564]
ENSMUSG00000022201	1105.67	864.282	0.34358	5.1944e-09	8.1601e-07	Zfr	protein_coding	zinc finger RNA binding protein [Source:MGI Symbol;Acc:MGI:1341890]
ENSMUSG00000042961	267.841	390.359	-0.50195	5.1441e-09	8.1601e-07	Egflam	protein_coding	EGF-like, fibronectin type III and laminin G domains [Source:MGI Symbol;Acc:MGI:2146149]
ENSMUSG00000063694	19705.5	23849.1	-0.26958	5.3255e-09	8.1759e-07	Cycs	protein_coding	cytochrome c, somatic [Source:MGI Symbol;Acc:MGI:88578]
ENSMUSG00000002996	1216.97	1533.94	-0.32433	5.2872e-09	8.1759e-07	Hbp1	protein_coding	high mobility group box transcription factor 1 [Source:MGI Symbol;Acc:MGI:894659]
ENSMUSG00000034163	359.93	224.835	0.60139	6.119e-09	9.2884e-07	Zfc3h1	protein_coding	zinc finger, C3H1-type containing [Source:MGI Symbol;Acc:MGI:2446143]
ENSMUSG00000029761	1024.17	821.734	0.3085	6.2803e-09	9.4275e-07	Cald1	protein_coding	caldesmon 1 [Source:MGI Symbol;Acc:MGI:88250]
ENSMUSG00000024413	430.777	666.364	-0.56568	6.6674e-09	9.8985e-07	Npc1	protein_coding	Niemann-Pick type C1 [Source:MGI Symbol;Acc:MGI:1097712]
ENSMUSG00000038239	14740.3	17413.3	-0.23655	6.8577e-09	1.007e-06	Hrc	protein_coding	histidine rich calcium binding protein [Source:MGI Symbol;Acc:MGI:96226]
ENSMUSG00000010048	782.279	1003.22	-0.34685	7.5322e-09	1.0942e-06	Ifrd2	protein_coding	interferon-related developmental regulator 2 [Source:MGI Symbol;Acc:MGI:1316708]
ENSMUSG00000017677	313.424	205.156	0.55263	7.8949e-09	1.1347e-06	Wsb1	protein_coding	WD repeat and SOCS box-containing 1 [Source:MGI Symbol;Acc:MGI:1926139]
ENSMUSG00000036932	1700.47	2065.31	-0.275	8.2355e-09	1.1712e-06	Aifm1	protein_coding	apoptosis-inducing factor, mitochondrion-associated 1 [Source:MGI Symbol;Acc:MGI:1349419]
ENSMUSG00000050640	114.451	191.445	-0.63835	8.7102e-09	1.2258e-06	Tmem150c	protein_coding	transmembrane protein 150C [Source:MGI Symbol;Acc:MGI:3041258]
ENSMUSG00000031137	925.528	1147.43	-0.30155	9.6383e-09	1.3424e-06	Fgf13	protein_coding	fibroblast growth factor 13 [Source:MGI Symbol;Acc:MGI:109178]
ENSMUSG00000037443	1121.11	890.062	0.32376	9.9131e-09	1.3666e-06	Cep85	protein_coding	centrosomal protein 85 [Source:MGI Symbol;Acc:MGI:1917262]
ENSMUSG00000024276	417.94	285.012	0.50791	1.0325e-08	1.409e-06	Zfp397	protein_coding	zinc finger protein 397 [Source:MGI Symbol;Acc:MGI:1916506]
ENSMUSG00000013236	897.525	1156.18	-0.35164	1.0751e-08	1.4525e-06	Ptprs	protein_coding	protein tyrosine phosphatase, receptor type, S [Source:MGI Symbol;Acc:MGI:97815]
ENSMUSG00000090066	1604.53	1132.67	0.46756	1.1679e-08	1.5622e-06	1110002E22Rik	protein_coding	RIKEN cDNA 1110002E22 gene [Source:MGI Symbol;Acc:MGI:1915066]
ENSMUSG00000038884	82.8453	41.5478	0.76713	1.4092e-08	1.8664e-06	A230050P20Rik	protein_coding	RIKEN cDNA A230050P20 gene [Source:MGI Symbol;Acc:MGI:2441788]
ENSMUSG00000025190	11205.8	13597.9	-0.27272	1.5089e-08	1.9791e-06	Got1	protein_coding	glutamic-oxaloacetic transaminase 1, soluble [Source:MGI Symbol;Acc:MGI:95791]
ENSMUSG00000020911	95.3947	47.5589	0.77122	1.5405e-08	2.0011e-06	Krt19	protein_coding	keratin 19 [Source:MGI Symbol;Acc:MGI:96693]
ENSMUSG00000015305	765.467	574.949	0.39315	1.8424e-08	2.3481e-06	Sash1	protein_coding	SAM and SH3 domain containing 1 [Source:MGI Symbol;Acc:MGI:1917347]
ENSMUSG00000000253	1976.45	2645.87	-0.3995	1.8311e-08	2.3481e-06	Gmpr	protein_coding	guanosine monophosphate reductase [Source:MGI Symbol;Acc:MGI:1913605]
ENSMUSG00000004945	1496.93	1827.06	-0.2808	1.9343e-08	2.4423e-06	Tmem242	protein_coding	transmembrane protein 242 [Source:MGI Symbol;Acc:MGI:1917794]
ENSMUSG00000053835	138.415	83.8422	0.62291	2.1605e-08	2.7026e-06	H2-T24	protein_coding	histocompatibility 2, T region locus 24 [Source:MGI Symbol;Acc:MGI:95958]
ENSMUSG00000037762	63.4052	26.0212	0.84582	2.3218e-08	2.8778e-06	Slc16a9	protein_coding	solute carrier family 16 (monocarboxylic acid transporters), member 9 [Source:MGI Symbol;Acc:MGI:1914109]
ENSMUSG00000095098	503.449	809.467	-0.59865	2.3535e-08	2.8906e-06	Ccdc85b	protein_coding	coiled-coil domain containing 85B [Source:MGI Symbol;Acc:MGI:2147607]
ENSMUSG00000026305	1380.13	1086	0.33283	2.4867e-08	2.9995e-06	Lrrfip1	protein_coding	leucine rich repeat (in FLII) interacting protein 1 [Source:MGI Symbol;Acc:MGI:1342770]
ENSMUSG00000026888	2921.58	3810.02	-0.36672	2.4687e-08	2.9995e-06	Grb14	protein_coding	growth factor receptor bound protein 14 [Source:MGI Symbol;Acc:MGI:1355324]
ENSMUSG00000000957	455.648	296.189	0.55242	2.8237e-08	3.3464e-06	Mmp14	protein_coding	matrix metallopeptidase 14 (membrane-inserted) [Source:MGI Symbol;Acc:MGI:101900]
ENSMUSG00000034614	764.32	1187.11	-0.56422	2.8137e-08	3.3464e-06	Pik3ip1	protein_coding	phosphoinositide-3-kinase interacting protein 1 [Source:MGI Symbol;Acc:MGI:1917016]
ENSMUSG00000031708	6745.69	8608.26	-0.33866	3.1902e-08	3.7155e-06	Tecr	protein_coding	trans-2,3-enoyl-CoA reductase [Source:MGI Symbol;Acc:MGI:1915408]
ENSMUSG00000078670	4260.83	5497.79	-0.35289	3.1839e-08	3.7155e-06	Fam174b	protein_coding	family with sequence similarity 174, member B [Source:MGI Symbol;Acc:MGI:3698178]
ENSMUSG00000061718	109.668	239.627	-0.80373	3.2773e-08	3.7843e-06	Ppp1r1b	protein_coding	protein phosphatase 1, regulatory (inhibitor) subunit 1B [Source:MGI Symbol;Acc:MGI:94860]
ENSMUSG00000014470	744.563	1122.14	-0.53305	3.8753e-08	4.4369e-06	Rnf166	protein_coding	ring finger protein 166 [Source:MGI Symbol;Acc:MGI:1915968]
ENSMUSG00000046997	161.61	87.536	0.70722	3.9631e-08	4.4993e-06	Spsb4	protein_coding	splA/ryanodine receptor domain and SOCS box containing 4 [Source:MGI Symbol;Acc:MGI:2183445]
ENSMUSG00000020674	1004.5	772.814	0.36051	4.1003e-08	4.6163e-06	Pxdn	protein_coding	peroxidasin homolog (Drosophila) [Source:MGI Symbol;Acc:MGI:1916925]
ENSMUSG00000032434	718.147	528.901	0.41423	4.3151e-08	4.7785e-06	Cmtm6	protein_coding	CKLF-like MARVEL transmembrane domain containing 6 [Source:MGI Symbol;Acc:MGI:2447165]
ENSMUSG00000053898	26304	33215.4	-0.32478	4.3118e-08	4.7785e-06	Ech1	protein_coding	enoyl coenzyme A hydratase 1, peroxisomal [Source:MGI Symbol;Acc:MGI:1858208]
ENSMUSG00000005417	2380.72	2017.61	0.23515	4.519e-08	4.9636e-06	Mprip	protein_coding	myosin phosphatase Rho interacting protein [Source:MGI Symbol;Acc:MGI:1349438]
ENSMUSG00000026701	2498.97	3017.97	-0.26596	4.621e-08	4.9999e-06	Prdx6	protein_coding	peroxiredoxin 6 [Source:MGI Symbol;Acc:MGI:894320]
ENSMUSG00000056612	677.391	876.945	-0.3566	4.6261e-08	4.9999e-06	Ppp1r14b	protein_coding	protein phosphatase 1, regulatory (inhibitor) subunit 14B [Source:MGI Symbol;Acc:MGI:107682]
ENSMUSG00000056121	1571.9	1938.4	-0.29415	4.8226e-08	5.1709e-06	Fez2	protein_coding	fasciculation and elongation protein zeta 2 (zygin II) [Source:MGI Symbol;Acc:MGI:2675856]
ENSMUSG00000032263	1295.75	1612.47	-0.30596	5.5977e-08	5.9548e-06	Bckdhb	protein_coding	branched chain ketoacid dehydrogenase E1, beta polypeptide [Source:MGI Symbol;Acc:MGI:88137]
ENSMUSG00000071172	1969.13	1432.27	0.42972	6.4024e-08	6.7575e-06	Srsf3	protein_coding	serine/arginine-rich splicing factor 3 [Source:MGI Symbol;Acc:MGI:98285]
ENSMUSG00000034525	850.672	602.499	0.46098	6.4691e-08	6.775e-06	BC018507	protein_coding	interactor of little elongation complex ELL subunit 1 [Source:MGI Symbol;Acc:MGI:2385865]
ENSMUSG00000026750	3329.04	3881.1	-0.21796	6.6282e-08	6.8882e-06	Psmb7	protein_coding	proteasome (prosome, macropain) subunit, beta type 7 [Source:MGI Symbol;Acc:MGI:107637]
ENSMUSG00000039197	1964.93	2364.35	-0.26112	6.7527e-08	6.964e-06	Adk	protein_coding	adenosine kinase [Source:MGI Symbol;Acc:MGI:87930]
ENSMUSG00000020638	243.475	150.55	0.59756	6.8631e-08	7.0243e-06	Cmpk2	protein_coding	cytidine monophosphate (UMP-CMP) kinase 2, mitochondrial [Source:MGI Symbol;Acc:MGI:99830]
ENSMUSG00000025701	200.998	300.055	-0.5196	7.0292e-08	7.1401e-06	Alox5	protein_coding	arachidonate 5-lipoxygenase [Source:MGI Symbol;Acc:MGI:87999]
ENSMUSG00000049588	166.796	97.8166	0.6429	7.2264e-08	7.2857e-06	Ccdc69	protein_coding	coiled-coil domain containing 69 [Source:MGI Symbol;Acc:MGI:1196234]
ENSMUSG00000069662	1176.52	825.087	0.47013	7.3484e-08	7.3539e-06	Marcks	protein_coding	myristoylated alanine rich protein kinase C substrate [Source:MGI Symbol;Acc:MGI:96907]
ENSMUSG00000029673	426.874	234.036	0.69302	7.4222e-08	7.373e-06	Auts2	protein_coding	autism susceptibility candidate 2 [Source:MGI Symbol;Acc:MGI:1919847]
ENSMUSG00000021024	2209.69	2564.66	-0.21175	7.5044e-08	7.4003e-06	Psma6	protein_coding	proteasome (prosome, macropain) subunit, alpha type 6 [Source:MGI Symbol;Acc:MGI:1347006]
ENSMUSG00000037885	289.833	412.227	-0.46795	7.603e-08	7.4432e-06	Stk35	protein_coding	serine/threonine kinase 35 [Source:MGI Symbol;Acc:MGI:1914583]
ENSMUSG00000028773	49801.2	63783.3	-0.34244	7.7618e-08	7.544e-06	Fabp3	protein_coding	fatty acid binding protein 3, muscle and heart [Source:MGI Symbol;Acc:MGI:95476]
ENSMUSG00000059734	2981.59	3737.16	-0.31494	8.2679e-08	7.9785e-06	Ndufs8	protein_coding	NADH dehydrogenase (ubiquinone) Fe-S protein 8 [Source:MGI Symbol;Acc:MGI:2385079]
ENSMUSG00000022338	314.652	413.307	-0.37519	8.7006e-08	8.3365e-06	Eny2	protein_coding	enhancer of yellow 2 homolog (Drosophila) [Source:MGI Symbol;Acc:MGI:1919286]
ENSMUSG00000026121	304.68	201.76	0.53115	8.9233e-08	8.3793e-06	Sema4c	protein_coding	sema domain, immunoglobulin domain (Ig), transmembrane domain (TM) and short cytoplasmic domain, (semaphorin) 4C [Source:MGI Symbol;Acc:MGI:109252]
ENSMUSG00000003154	840.161	585.653	0.47722	8.9313e-08	8.3793e-06	Foxj2	protein_coding	forkhead box J2 [Source:MGI Symbol;Acc:MGI:1926805]
ENSMUSG00000009545	585.534	826.032	-0.45959	8.8913e-08	8.3793e-06	Kcnq1	protein_coding	potassium voltage-gated channel, subfamily Q, member 1 [Source:MGI Symbol;Acc:MGI:108083]
ENSMUSG00000020484	1213.05	999.629	0.27234	9.3579e-08	8.719e-06	Xbp1	protein_coding	X-box binding protein 1 [Source:MGI Symbol;Acc:MGI:98970]
ENSMUSG00000096054	1367.98	1010.35	0.41087	9.5597e-08	8.846e-06	Syne1	protein_coding	spectrin repeat containing, nuclear envelope 1 [Source:MGI Symbol;Acc:MGI:1927152]
ENSMUSG00000071856	350.895	246.3	0.46566	9.7676e-08	8.9769e-06	Mcc	protein_coding	mutated in colorectal cancers [Source:MGI Symbol;Acc:MGI:96930]
ENSMUSG00000031461	26953	20791.6	0.35736	1.0616e-07	9.6905e-06	Myom2	protein_coding	myomesin 2 [Source:MGI Symbol;Acc:MGI:1328358]
ENSMUSG00000020386	1902.26	2320.47	-0.27933	1.1065e-07	1.0033e-05	Sar1b	protein_coding	SAR1 gene homolog B (S. cerevisiae) [Source:MGI Symbol;Acc:MGI:1913647]
ENSMUSG00000027248	2796.1	2317.43	0.26452	1.1392e-07	1.0193e-05	Pdia3	protein_coding	protein disulfide isomerase associated 3 [Source:MGI Symbol;Acc:MGI:95834]
ENSMUSG00000030706	929.445	1172.46	-0.32307	1.1326e-07	1.0193e-05	Mrpl48	protein_coding	mitochondrial ribosomal protein L48 [Source:MGI Symbol;Acc:MGI:1289321]
ENSMUSG00000028017	102.406	191.772	-0.70663	1.2051e-07	1.0711e-05	Egf	protein_coding	epidermal growth factor [Source:MGI Symbol;Acc:MGI:95290]
ENSMUSG00000048126	486.192	330.508	0.50355	1.2583e-07	1.1111e-05	Col6a3	protein_coding	collagen, type VI, alpha 3 [Source:MGI Symbol;Acc:MGI:88461]
ENSMUSG00000018427	558.569	307.62	0.68534	1.2938e-07	1.135e-05	Ypel2	protein_coding	yippee-like 2 (Drosophila) [Source:MGI Symbol;Acc:MGI:1925114]
ENSMUSG00000020810	1109.56	1492.27	-0.40246	1.3727e-07	1.1965e-05	Cygb	protein_coding	cytoglobin [Source:MGI Symbol;Acc:MGI:2149481]
ENSMUSG00000040086	2121.37	2549.4	-0.25911	1.4606e-07	1.2649e-05	Tnni3k	protein_coding	TNNI3 interacting kinase [Source:MGI Symbol;Acc:MGI:2443276]
ENSMUSG00000038319	1767.23	2564.52	-0.48787	1.6971e-07	1.4604e-05	Kcnh2	protein_coding	potassium voltage-gated channel, subfamily H (eag-related), member 2 [Source:MGI Symbol;Acc:MGI:1341722]
ENSMUSG00000032064	143.825	227.272	-0.57332	1.7185e-07	1.4694e-05	Dixdc1	protein_coding	DIX domain containing 1 [Source:MGI Symbol;Acc:MGI:2679721]
ENSMUSG00000055065	2691.86	1747.78	0.54841	1.7489e-07	1.486e-05	Ddx17	protein_coding	DEAD (Asp-Glu-Ala-Asp) box polypeptide 17 [Source:MGI Symbol;Acc:MGI:1914290]
ENSMUSG00000027875	1023.08	673.478	0.5343	1.8125e-07	1.5304e-05	Hmgcs2	protein_coding	3-hydroxy-3-methylglutaryl-Coenzyme A synthase 2 [Source:MGI Symbol;Acc:MGI:101939]
ENSMUSG00000010080	229.799	327.156	-0.468	1.9377e-07	1.626e-05	Epn3	protein_coding	epsin 3 [Source:MGI Symbol;Acc:MGI:1919139]
ENSMUSG00000009863	12198.7	14586	-0.25193	1.9717e-07	1.6345e-05	Sdhb	protein_coding	succinate dehydrogenase complex, subunit B, iron sulfur (Ip) [Source:MGI Symbol;Acc:MGI:1914930]
ENSMUSG00000002409	270.172	415.508	-0.54719	1.9721e-07	1.6345e-05	Dyrk1b	protein_coding	dual-specificity tyrosine-(Y)-phosphorylation regulated kinase 1b [Source:MGI Symbol;Acc:MGI:1330302]
ENSMUSG00000003541	371.475	572.017	-0.54612	2.0187e-07	1.6629e-05	Ier3	protein_coding	immediate early response 3 [Source:MGI Symbol;Acc:MGI:104814]
ENSMUSG00000024529	98.1703	56.4262	0.65462	2.0898e-07	1.6966e-05	Lox	protein_coding	lysyl oxidase [Source:MGI Symbol;Acc:MGI:96817]
ENSMUSG00000030884	15320	17632	-0.1999	2.0972e-07	1.6966e-05	Uqcrc2	protein_coding	ubiquinol cytochrome c reductase core protein 2 [Source:MGI Symbol;Acc:MGI:1914253]
ENSMUSG00000031990	331.794	444.202	-0.39677	2.0907e-07	1.6966e-05	Jam3	protein_coding	junction adhesion molecule 3 [Source:MGI Symbol;Acc:MGI:1933825]
ENSMUSG00000079355	46.6587	93.2155	-0.73202	2.9742e-07	2.3917e-05	Ackr4	protein_coding	atypical chemokine receptor 4 [Source:MGI Symbol;Acc:MGI:2181676]
ENSMUSG00000030889	105.11	52.2656	0.73436	3.1524e-07	2.5052e-05	Vwa3a	protein_coding	von Willebrand factor A domain containing 3A [Source:MGI Symbol;Acc:MGI:3041229]
ENSMUSG00000033318	95.3183	160.784	-0.6264	3.1371e-07	2.5052e-05	Gstt2	protein_coding	glutathione S-transferase, theta 2 [Source:MGI Symbol;Acc:MGI:106188]
ENSMUSG00000026389	676.131	855.427	-0.32562	3.186e-07	2.5172e-05	Steap3	protein_coding	STEAP family member 3 [Source:MGI Symbol;Acc:MGI:1915678]
ENSMUSG00000015671	1393.35	1728.73	-0.30061	3.2621e-07	2.5623e-05	Psma2	protein_coding	proteasome (prosome, macropain) subunit, alpha type 2 [Source:MGI Symbol;Acc:MGI:104885]
ENSMUSG00000059326	351.228	234.439	0.51821	3.354e-07	2.6193e-05	Csf2ra	protein_coding	colony stimulating factor 2 receptor, alpha, low-affinity (granulocyte-macrophage) [Source:MGI Symbol;Acc:MGI:1339754]
ENSMUSG00000042032	1540.2	1845.76	-0.25546	3.3761e-07	2.6213e-05	Mat2b	protein_coding	methionine adenosyltransferase II, beta [Source:MGI Symbol;Acc:MGI:1913667]
ENSMUSG00000071547	211.957	316.638	-0.51541	3.4882e-07	2.6929e-05	Nt5dc2	protein_coding	5'-nucleotidase domain containing 2 [Source:MGI Symbol;Acc:MGI:1917271]
ENSMUSG00000031217	610.285	435.182	0.44668	3.6287e-07	2.7854e-05	Efnb1	protein_coding	ephrin B1 [Source:MGI Symbol;Acc:MGI:102708]
ENSMUSG00000029359	1588.06	2097.37	-0.37887	3.6781e-07	2.8074e-05	Tesc	protein_coding	tescalcin [Source:MGI Symbol;Acc:MGI:1930803]
ENSMUSG00000030256	468.547	798.154	-0.62998	3.7782e-07	2.8676e-05	Bhlhe41	protein_coding	basic helix-loop-helix family, member e41 [Source:MGI Symbol;Acc:MGI:1930704]
ENSMUSG00000086645	6.21218	23.0291	-0.81426	3.8867e-07	2.9335e-05	Gm15743	antisense	predicted gene 15743 [Source:MGI Symbol;Acc:MGI:3783185]
ENSMUSG00000041653	52.5325	12.9383	0.80207	4.3153e-07	3.2389e-05	Pnpla3	protein_coding	patatin-like phospholipase domain containing 3 [Source:MGI Symbol;Acc:MGI:2151796]
ENSMUSG00000040624	222.031	138.314	0.5799	4.7755e-07	3.5645e-05	Plekhg1	protein_coding	pleckstrin homology domain containing, family G (with RhoGef domain) member 1 [Source:MGI Symbol;Acc:MGI:2676551]
ENSMUSG00000028603	5454.74	6400.08	-0.22595	4.9426e-07	3.669e-05	Scp2	protein_coding	sterol carrier protein 2, liver [Source:MGI Symbol;Acc:MGI:98254]
ENSMUSG00000029228	117.36	186.692	-0.57349	5.008e-07	3.6972e-05	Lnx1	protein_coding	ligand of numb-protein X 1 [Source:MGI Symbol;Acc:MGI:1278335]
ENSMUSG00000010307	258.8	426.88	-0.60318	5.0889e-07	3.7364e-05	Tmem86a	protein_coding	transmembrane protein 86A [Source:MGI Symbol;Acc:MGI:1915143]
ENSMUSG00000036850	1003.33	1244.99	-0.30084	5.2341e-07	3.8223e-05	Mrpl41	protein_coding	mitochondrial ribosomal protein L41 [Source:MGI Symbol;Acc:MGI:1333816]
ENSMUSG00000053110	1991.95	1670.99	0.24774	5.3782e-07	3.8649e-05	Yap1	protein_coding	yes-associated protein 1 [Source:MGI Symbol;Acc:MGI:103262]
ENSMUSG00000015750	1443.1	1777.25	-0.29119	5.3506e-07	3.8649e-05	Aph1a	protein_coding	anterior pharynx defective 1a homolog (C. elegans) [Source:MGI Symbol;Acc:MGI:2385110]
ENSMUSG00000022186	15988.3	19972.3	-0.3088	5.3515e-07	3.8649e-05	Oxct1	protein_coding	3-oxoacid CoA transferase 1 [Source:MGI Symbol;Acc:MGI:1914291]
ENSMUSG00000039735	471.71	346.418	0.41391	5.6791e-07	4.0595e-05	Fnbp1l	protein_coding	formin binding protein 1-like [Source:MGI Symbol;Acc:MGI:1925642]
ENSMUSG00000031791	6312.05	7586.25	-0.25842	5.8979e-07	4.15e-05	Tmem38a	protein_coding	transmembrane protein 38A [Source:MGI Symbol;Acc:MGI:1921416]
ENSMUSG00000036026	1250.01	1587.01	-0.32974	5.8395e-07	4.15e-05	Tmem63b	protein_coding	transmembrane protein 63b [Source:MGI Symbol;Acc:MGI:2387609]
ENSMUSG00000025271	220.94	398.732	-0.66512	5.8801e-07	4.15e-05	Pfkfb1	protein_coding	6-phosphofructo-2-kinase/fructose-2,6-biphosphatase 1 [Source:MGI Symbol;Acc:MGI:107816]
ENSMUSG00000101609	63.4338	26.6609	0.77963	6.0215e-07	4.215e-05	Kcnq1ot1	antisense	KCNQ1 overlapping transcript 1 [Source:MGI Symbol;Acc:MGI:1926855]
ENSMUSG00000031389	31.3522	10.6396	0.80184	6.2242e-07	4.3345e-05	Arhgap4	protein_coding	Rho GTPase activating protein 4 [Source:MGI Symbol;Acc:MGI:2159577]
ENSMUSG00000035268	3005.51	3857.66	-0.34301	6.2892e-07	4.3573e-05	Pkig	protein_coding	protein kinase inhibitor, gamma [Source:MGI Symbol;Acc:MGI:1343086]
ENSMUSG00000078307	13.8059	38.9581	-0.79752	6.7033e-07	4.6205e-05	AI593442	protein_coding	expressed sequence AI593442 [Source:MGI Symbol;Acc:MGI:2143099]
ENSMUSG00000033453	208.968	106.579	0.70903	6.9913e-07	4.7945e-05	Adamts15	protein_coding	a disintegrin-like and metallopeptidase (reprolysin type) with thrombospondin type 1 motif, 15 [Source:MGI Symbol;Acc:MGI:2449569]
ENSMUSG00000039218	2299.71	1543.13	0.50994	7.0393e-07	4.803e-05	Srrm2	protein_coding	serine/arginine repetitive matrix 2 [Source:MGI Symbol;Acc:MGI:1923206]
ENSMUSG00000032279	8472.03	9766.2	-0.20191	7.2008e-07	4.8886e-05	Idh3a	protein_coding	isocitrate dehydrogenase 3 (NAD+) alpha [Source:MGI Symbol;Acc:MGI:1915084]
ENSMUSG00000019326	424.28	293.496	0.47921	7.2505e-07	4.8977e-05	Aoc3	protein_coding	amine oxidase, copper containing 3 [Source:MGI Symbol;Acc:MGI:1306797]
ENSMUSG00000008932	8.49743	27.7467	-0.79699	7.4121e-07	4.982e-05	Slc1a7	protein_coding	solute carrier family 1 (glutamate transporter), member 7 [Source:MGI Symbol;Acc:MGI:2444087]
ENSMUSG00000034472	83.6845	156.547	-0.68418	8.0665e-07	5.3949e-05	Rasd2	protein_coding	RASD family, member 2 [Source:MGI Symbol;Acc:MGI:1922391]
ENSMUSG00000024683	1045.89	1286.36	-0.28892	8.1116e-07	5.3984e-05	Mrpl16	protein_coding	mitochondrial ribosomal protein L16 [Source:MGI Symbol;Acc:MGI:2137219]
ENSMUSG00000028957	300.186	512.464	-0.62329	9.1167e-07	6.0376e-05	Per3	protein_coding	period circadian clock 3 [Source:MGI Symbol;Acc:MGI:1277134]
ENSMUSG00000057137	77.0599	41.1307	0.68398	9.4202e-07	6.2081e-05	Tmem140	protein_coding	transmembrane protein 140 [Source:MGI Symbol;Acc:MGI:1915737]
ENSMUSG00000020719	7416.29	5658.5	0.36791	9.9274e-07	6.5106e-05	Ddx5	protein_coding	DEAD (Asp-Glu-Ala-Asp) box polypeptide 5 [Source:MGI Symbol;Acc:MGI:105037]
ENSMUSG00000039831	1121.51	835.137	0.39706	1.0983e-06	7.1685e-05	Arhgap29	protein_coding	Rho GTPase activating protein 29 [Source:MGI Symbol;Acc:MGI:2443818]
ENSMUSG00000021764	4037.09	4790.03	-0.24093	1.1146e-06	7.2046e-05	Ndufs4	protein_coding	NADH dehydrogenase (ubiquinone) Fe-S protein 4 [Source:MGI Symbol;Acc:MGI:1343135]
ENSMUSG00000035112	154.368	228.22	-0.49793	1.1132e-06	7.2046e-05	Wnk4	protein_coding	WNK lysine deficient protein kinase 4 [Source:MGI Symbol;Acc:MGI:1917097]
ENSMUSG00000038119	262.152	173.224	0.52266	1.1462e-06	7.3741e-05	Cdon	protein_coding	cell adhesion molecule-related/down-regulated by oncogenes [Source:MGI Symbol;Acc:MGI:1926387]
ENSMUSG00000058076	7619.21	8997.72	-0.2346	1.1816e-06	7.5658e-05	Sdhc	protein_coding	succinate dehydrogenase complex, subunit C, integral membrane protein [Source:MGI Symbol;Acc:MGI:1913302]
ENSMUSG00000027099	1559.16	1858.25	-0.24766	1.2392e-06	7.8729e-05	Mtx2	protein_coding	metaxin 2 [Source:MGI Symbol;Acc:MGI:1859652]
ENSMUSG00000024007	615.86	839.315	-0.41384	1.2412e-06	7.8729e-05	Ppil1	protein_coding	peptidylprolyl isomerase (cyclophilin)-like 1 [Source:MGI Symbol;Acc:MGI:1916066]
ENSMUSG00000030852	6002.9	4686.39	0.33942	1.2612e-06	7.9621e-05	Tacc2	protein_coding	transforming, acidic coiled-coil containing protein 2 [Source:MGI Symbol;Acc:MGI:1928899]
ENSMUSG00000044066	831.749	629.88	0.37556	1.3069e-06	8.2123e-05	Cep68	protein_coding	centrosomal protein 68 [Source:MGI Symbol;Acc:MGI:2667663]
ENSMUSG00000035064	659.124	867.138	-0.3728	1.3704e-06	8.5714e-05	Eef2k	protein_coding	eukaryotic elongation factor-2 kinase [Source:MGI Symbol;Acc:MGI:1195261]
ENSMUSG00000024099	7108.38	8528.62	-0.25547	1.4013e-06	8.724e-05	Ndufv2	protein_coding	NADH dehydrogenase (ubiquinone) flavoprotein 2 [Source:MGI Symbol;Acc:MGI:1920150]
ENSMUSG00000011256	652.18	236.934	0.77169	1.5727e-06	9.7466e-05	Adam19	protein_coding	a disintegrin and metallopeptidase domain 19 (meltrin beta) [Source:MGI Symbol;Acc:MGI:105377]
ENSMUSG00000000563	15647.3	18188.3	-0.21293	1.5911e-06	9.8157e-05	Atp5f1	protein_coding	ATP synthase, H+ transporting, mitochondrial F0 complex, subunit B1 [Source:MGI Symbol;Acc:MGI:1100495]
ENSMUSG00000042380	561.759	704.474	-0.31327	1.6035e-06	9.8471e-05	Smim12	protein_coding	small integral membrane protein 12 [Source:MGI Symbol;Acc:MGI:1933141]
ENSMUSG00000047746	3988.92	2879.99	0.43017	1.6544e-06	0.00010114	Fbxo40	protein_coding	F-box protein 40 [Source:MGI Symbol;Acc:MGI:2443753]
ENSMUSG00000016921	1314.99	1028.45	0.33736	1.696e-06	0.00010321	Srsf6	protein_coding	serine/arginine-rich splicing factor 6 [Source:MGI Symbol;Acc:MGI:1915246]
ENSMUSG00000021951	367.841	479.105	-0.36037	1.7066e-06	0.00010339	N6amt2	protein_coding	N-6 adenine-specific DNA methyltransferase 2 (putative) [Source:MGI Symbol;Acc:MGI:1915293]
ENSMUSG00000040174	236.591	313.981	-0.38229	1.7578e-06	0.00010602	Alkbh3	protein_coding	alkB, alkylation repair homolog 3 (E. coli) [Source:MGI Symbol;Acc:MGI:1916363]
ENSMUSG00000038403	3146.02	3972.51	-0.32134	1.7921e-06	0.00010761	Hfe2	protein_coding	hemochromatosis type 2 (juvenile) (human homolog) [Source:MGI Symbol;Acc:MGI:1916835]
ENSMUSG00000067235	49.7237	13.5274	0.75746	1.8696e-06	0.00011176	H2-Q10	protein_coding	histocompatibility 2, Q region locus 10 [Source:MGI Symbol;Acc:MGI:95929]
ENSMUSG00000051319	531.385	659.641	-0.29899	1.933e-06	0.00011504	1500011K16Rik	protein_coding	RIKEN cDNA 1500011K16 gene [Source:MGI Symbol;Acc:MGI:1915135]
ENSMUSG00000007891	15961.2	19116.6	-0.25292	2.0582e-06	0.00012196	Ctsd	protein_coding	cathepsin D [Source:MGI Symbol;Acc:MGI:88562]
ENSMUSG00000022551	14682.2	18198.5	-0.29753	2.1665e-06	0.00012781	Cyc1	protein_coding	cytochrome c-1 [Source:MGI Symbol;Acc:MGI:1913695]
ENSMUSG00000054469	1940.77	2588.58	-0.38708	2.343e-06	0.00013703	Lclat1	protein_coding	lysocardiolipin acyltransferase 1 [Source:MGI Symbol;Acc:MGI:2684937]
ENSMUSG00000031712	467.313	629.195	-0.39803	2.3429e-06	0.00013703	Il15	protein_coding	interleukin 15 [Source:MGI Symbol;Acc:MGI:103014]
ENSMUSG00000043439	27.1446	66.0535	-0.74851	2.3564e-06	0.00013722	E130012A19Rik	protein_coding	RIKEN cDNA E130012A19 gene [Source:MGI Symbol;Acc:MGI:2143991]
ENSMUSG00000053329	6243.47	7462.31	-0.25028	2.3986e-06	0.00013908	D10Jhu81e	protein_coding	DNA segment, Chr 10, Johns Hopkins University 81 expressed [Source:MGI Symbol;Acc:MGI:1351861]
ENSMUSG00000036880	18939.7	23908.7	-0.32045	2.4152e-06	0.00013944	Acaa2	protein_coding	acetyl-Coenzyme A acyltransferase 2 (mitochondrial 3-oxoacyl-Coenzyme A thiolase) [Source:MGI Symbol;Acc:MGI:1098623]
ENSMUSG00000056054	8.08056	29.2498	-0.75069	2.4267e-06	0.00013951	S100a8	protein_coding	S100 calcium binding protein A8 (calgranulin A) [Source:MGI Symbol;Acc:MGI:88244]
ENSMUSG00000028150	620.188	420.821	0.49295	2.4396e-06	0.00013966	Rorc	protein_coding	RAR-related orphan receptor gamma [Source:MGI Symbol;Acc:MGI:104856]
ENSMUSG00000027371	411.401	520.738	-0.32234	2.4715e-06	0.00014089	Fahd2a	protein_coding	fumarylacetoacetate hydrolase domain containing 2A [Source:MGI Symbol;Acc:MGI:1915376]
ENSMUSG00000074218	10583	13052.6	-0.29109	2.494e-06	0.00014157	Cox7a1	protein_coding	cytochrome c oxidase subunit VIIa 1 [Source:MGI Symbol;Acc:MGI:1316714]
ENSMUSG00000059208	2122.64	1812.62	0.22339	2.5103e-06	0.0001419	Hnrnpm	protein_coding	heterogeneous nuclear ribonucleoprotein M [Source:MGI Symbol;Acc:MGI:1926465]
ENSMUSG00000045193	952.809	1392.18	-0.48454	2.5835e-06	0.00014543	Cirbp	protein_coding	cold inducible RNA binding protein [Source:MGI Symbol;Acc:MGI:893588]
ENSMUSG00000032324	3260.21	3769.53	-0.20556	2.6335e-06	0.00014702	Tspan3	protein_coding	tetraspanin 3 [Source:MGI Symbol;Acc:MGI:1928098]
ENSMUSG00000062981	4876.84	5816.23	-0.24709	2.6304e-06	0.00014702	Mrpl42	protein_coding	mitochondrial ribosomal protein L42 [Source:MGI Symbol;Acc:MGI:1333774]
ENSMUSG00000032336	1462.38	1693.83	-0.20791	2.6952e-06	0.00014984	Nptn	protein_coding	neuroplastin [Source:MGI Symbol;Acc:MGI:108077]
ENSMUSG00000040054	634.535	514.119	0.29245	2.7859e-06	0.00015425	Baz2a	protein_coding	bromodomain adjacent to zinc finger domain, 2A [Source:MGI Symbol;Acc:MGI:2151152]
ENSMUSG00000070327	569.752	444.874	0.33932	2.8224e-06	0.00015564	Rnf213	protein_coding	ring finger protein 213 [Source:MGI Symbol;Acc:MGI:1289196]
ENSMUSG00000033377	884.381	700.823	0.32088	2.8662e-06	0.00015741	Palmd	protein_coding	palmdelphin [Source:MGI Symbol;Acc:MGI:2148896]
ENSMUSG00000027230	174.389	110.855	0.54989	2.9043e-06	0.0001577	Creb3l1	protein_coding	cAMP responsive element binding protein 3-like 1 [Source:MGI Symbol;Acc:MGI:1347062]
ENSMUSG00000038178	347.382	244.156	0.45489	2.9065e-06	0.0001577	Slc43a2	protein_coding	solute carrier family 43, member 2 [Source:MGI Symbol;Acc:MGI:2442746]
ENSMUSG00000003934	2556.54	3382.89	-0.37727	2.8876e-06	0.0001577	Efnb3	protein_coding	ephrin B3 [Source:MGI Symbol;Acc:MGI:109196]
ENSMUSG00000032786	2062.63	2531.33	-0.28475	2.9324e-06	0.00015847	Alas1	protein_coding	aminolevulinic acid synthase 1 [Source:MGI Symbol;Acc:MGI:87989]
ENSMUSG00000020321	32310	37158.1	-0.19816	2.9909e-06	0.00016098	Mdh1	protein_coding	malate dehydrogenase 1, NAD (soluble) [Source:MGI Symbol;Acc:MGI:97051]
ENSMUSG00000004849	544.265	698.321	-0.34055	3.0835e-06	0.00016531	Ap1s1	protein_coding	adaptor protein complex AP-1, sigma 1 [Source:MGI Symbol;Acc:MGI:1098244]
ENSMUSG00000002010	9565.32	11332.7	-0.23838	3.1378e-06	0.00016756	Idh3g	protein_coding	isocitrate dehydrogenase 3 (NAD+), gamma [Source:MGI Symbol;Acc:MGI:1099463]
ENSMUSG00000022337	1511.44	1775.17	-0.22649	3.2403e-06	0.00017235	Emc2	protein_coding	ER membrane protein complex subunit 2 [Source:MGI Symbol;Acc:MGI:1913986]
ENSMUSG00000035478	1488.1	1896.88	-0.3321	3.2599e-06	0.00017271	Mbd3	protein_coding	methyl-CpG binding domain protein 3 [Source:MGI Symbol;Acc:MGI:1333812]
ENSMUSG00000032705	270.027	193.556	0.43553	3.2919e-06	0.00017305	Exd2	protein_coding	exonuclease 3'-5' domain containing 2 [Source:MGI Symbol;Acc:MGI:1922485]
ENSMUSG00000052632	258.212	185.764	0.43131	3.2799e-06	0.00017305	Asap2	protein_coding	ArfGAP with SH3 domain, ankyrin repeat and PH domain 2 [Source:MGI Symbol;Acc:MGI:2685438]
ENSMUSG00000032314	14095.1	16133.8	-0.19172	3.342e-06	0.000175	Etfa	protein_coding	electron transferring flavoprotein, alpha polypeptide [Source:MGI Symbol;Acc:MGI:106092]
ENSMUSG00000052456	951.112	1148.79	-0.26357	3.371e-06	0.00017584	Asna1	protein_coding	arsA arsenite transporter, ATP-binding, homolog 1 (bacterial) [Source:MGI Symbol;Acc:MGI:1928379]
ENSMUSG00000005299	1255.45	1529.92	-0.27516	3.4158e-06	0.00017728	Letm1	protein_coding	leucine zipper-EF-hand containing transmembrane protein 1 [Source:MGI Symbol;Acc:MGI:1932557]
ENSMUSG00000075705	1732.63	2189.58	-0.32102	3.4249e-06	0.00017728	Msrb1	protein_coding	methionine sulfoxide reductase B1 [Source:MGI Symbol;Acc:MGI:1351642]
ENSMUSG00000014846	674.323	496.579	0.40822	3.483e-06	0.0001796	Tppp3	protein_coding	tubulin polymerization-promoting protein family member 3 [Source:MGI Symbol;Acc:MGI:1915221]
ENSMUSG00000056124	571.109	425.483	0.39343	3.5158e-06	0.0001806	B4galt6	protein_coding	UDP-Gal:betaGlcNAc beta 1,4-galactosyltransferase, polypeptide 6 [Source:MGI Symbol;Acc:MGI:1928380]
ENSMUSG00000022748	619.08	771.88	-0.30413	3.5319e-06	0.00018074	Cmss1	protein_coding	cms small ribosomal subunit 1 [Source:MGI Symbol;Acc:MGI:1913747]
ENSMUSG00000056367	615.443	819.168	-0.38389	3.576e-06	0.00018231	Actr3b	protein_coding	ARP3 actin-related protein 3B [Source:MGI Symbol;Acc:MGI:2661120]
ENSMUSG00000060206	112.209	71.8163	0.54247	3.6622e-06	0.00018593	Zfp462	protein_coding	zinc finger protein 462 [Source:MGI Symbol;Acc:MGI:107690]
ENSMUSG00000058013	362.647	279.784	0.35214	3.6746e-06	0.00018593	2019-09-11	protein_coding	septin 11 [Source:MGI Symbol;Acc:MGI:1277214]
ENSMUSG00000025993	560.626	419.851	0.38578	3.8207e-06	0.00019261	Slc40a1	protein_coding	solute carrier family 40 (iron-regulated transporter), member 1 [Source:MGI Symbol;Acc:MGI:1315204]
ENSMUSG00000030098	280.082	150.707	0.65583	3.8599e-06	0.00019315	Grip2	protein_coding	glutamate receptor interacting protein 2 [Source:MGI Symbol;Acc:MGI:2681173]
ENSMUSG00000060600	17050.4	21280.5	-0.30562	3.8601e-06	0.00019315	Eno3	protein_coding	enolase 3, beta muscle [Source:MGI Symbol;Acc:MGI:95395]
ENSMUSG00000022965	2276.68	2846.55	-0.30843	3.9035e-06	0.0001946	Ifngr2	protein_coding	interferon gamma receptor 2 [Source:MGI Symbol;Acc:MGI:107654]
ENSMUSG00000041126	1281.03	1590.88	-0.29952	3.9374e-06	0.00019557	H2afv	protein_coding	H2A histone family, member V [Source:MGI Symbol;Acc:MGI:1924855]
ENSMUSG00000029776	4338.92	4966.07	-0.19157	3.9943e-06	0.00019623	Hibadh	protein_coding	3-hydroxyisobutyrate dehydrogenase [Source:MGI Symbol;Acc:MGI:1889802]
ENSMUSG00000025487	1040.16	1249.27	-0.25589	3.9654e-06	0.00019623	Psmd13	protein_coding	proteasome (prosome, macropain) 26S subunit, non-ATPase, 13 [Source:MGI Symbol;Acc:MGI:1345192]
ENSMUSG00000024975	247.977	366.198	-0.49467	3.9809e-06	0.00019623	Pdcd4	protein_coding	programmed cell death 4 [Source:MGI Symbol;Acc:MGI:107490]
ENSMUSG00000041415	503.89	403.007	0.30812	4.1688e-06	0.00020259	Dicer1	protein_coding	dicer 1, ribonuclease type III [Source:MGI Symbol;Acc:MGI:2177178]
ENSMUSG00000038370	3076.97	3595.93	-0.21976	4.1442e-06	0.00020259	Pcp4l1	protein_coding	Purkinje cell protein 4-like 1 [Source:MGI Symbol;Acc:MGI:1913675]
ENSMUSG00000031230	367.913	604.439	-0.5812	4.1569e-06	0.00020259	Fgf16	protein_coding	fibroblast growth factor 16 [Source:MGI Symbol;Acc:MGI:1931627]
ENSMUSG00000024501	820.362	651.294	0.31629	4.1872e-06	0.00020266	Dpysl3	protein_coding	dihydropyrimidinase-like 3 [Source:MGI Symbol;Acc:MGI:1349762]
ENSMUSG00000039633	243.061	325.398	-0.3895	4.2001e-06	0.00020266	Lonrf1	protein_coding	LON peptidase N-terminal domain and ring finger 1 [Source:MGI Symbol;Acc:MGI:3609241]
ENSMUSG00000032035	1040.57	737.396	0.44574	4.248e-06	0.00020351	Ets1	protein_coding	E26 avian leukemia oncogene 1, 5' domain [Source:MGI Symbol;Acc:MGI:95455]
ENSMUSG00000020889	598.104	1167.34	-0.67732	4.2424e-06	0.00020351	Nr1d1	protein_coding	nuclear receptor subfamily 1, group D, member 1 [Source:MGI Symbol;Acc:MGI:2444210]
ENSMUSG00000037999	283.629	206.174	0.41952	4.3099e-06	0.00020575	Arap2	protein_coding	ArfGAP with RhoGAP domain, ankyrin repeat and PH domain 2 [Source:MGI Symbol;Acc:MGI:2684416]
ENSMUSG00000002900	1741.61	1471.11	0.23617	4.3875e-06	0.00020872	Lamb1	protein_coding	laminin B1 [Source:MGI Symbol;Acc:MGI:96743]
ENSMUSG00000030647	3561.59	4309.51	-0.26576	4.4834e-06	0.00021253	Ndufc2	protein_coding	NADH dehydrogenase (ubiquinone) 1, subcomplex unknown, 2 [Source:MGI Symbol;Acc:MGI:1344370]
ENSMUSG00000042340	94.7846	152.28	-0.56459	4.6348e-06	0.00021894	Ctf1	protein_coding	cardiotrophin 1 [Source:MGI Symbol;Acc:MGI:105115]
ENSMUSG00000029683	9842.66	12361.9	-0.31323	4.8107e-06	0.00022646	Lmod2	protein_coding	leiomodin 2 (cardiac) [Source:MGI Symbol;Acc:MGI:2135672]
ENSMUSG00000031782	7851.05	9209.22	-0.22482	4.9326e-06	0.00023091	Coq9	protein_coding	coenzyme Q9 homolog (yeast) [Source:MGI Symbol;Acc:MGI:1915164]
ENSMUSG00000028959	3565.26	4307.95	-0.26423	4.9395e-06	0.00023091	Fastk	protein_coding	Fas-activated serine/threonine kinase [Source:MGI Symbol;Acc:MGI:1913837]
ENSMUSG00000058624	312.265	219.914	0.45318	5.0931e-06	0.00023645	Gda	protein_coding	guanine deaminase [Source:MGI Symbol;Acc:MGI:95678]
ENSMUSG00000041650	1498.59	1725.95	-0.19968	5.082e-06	0.00023645	Pcca	protein_coding	propionyl-Coenzyme A carboxylase, alpha polypeptide [Source:MGI Symbol;Acc:MGI:97499]
ENSMUSG00000028455	811.106	996.163	-0.28459	5.1174e-06	0.00023677	Stoml2	protein_coding	stomatin (Epb7.2)-like 2 [Source:MGI Symbol;Acc:MGI:1913842]
ENSMUSG00000037353	176.063	115.364	0.52071	5.2028e-06	0.0002399	Letmd1	protein_coding	LETM1 domain containing 1 [Source:MGI Symbol;Acc:MGI:1915864]
ENSMUSG00000008200	261.591	190.467	0.41793	5.3977e-06	0.00024729	Fnbp4	protein_coding	formin binding protein 4 [Source:MGI Symbol;Acc:MGI:1860513]
ENSMUSG00000027961	1961.34	2352.1	-0.2547	5.4076e-06	0.00024729	Lrrc39	protein_coding	leucine rich repeat containing 39 [Source:MGI Symbol;Acc:MGI:1924557]
ENSMUSG00000101655	180.791	255.661	-0.44935	5.4181e-06	0.00024729	RP23-281H4.5	lincRNA	RIKEN cDNA 2310040G24 gene [Source:MGI Symbol;Acc:MGI:1916897]
ENSMUSG00000032637	1031.91	814.563	0.32496	5.4871e-06	0.00024793	Atxn2l	protein_coding	ataxin 2-like [Source:MGI Symbol;Acc:MGI:2446242]
ENSMUSG00000038462	13657.7	15982.6	-0.22155	5.486e-06	0.00024793	Uqcrfs1	protein_coding	ubiquinol-cytochrome c reductase, Rieske iron-sulfur polypeptide 1 [Source:MGI Symbol;Acc:MGI:1913944]
ENSMUSG00000006587	59.975	116.187	-0.6701	5.46e-06	0.00024793	Snai3	protein_coding	snail family zinc finger 3 [Source:MGI Symbol;Acc:MGI:1353563]
ENSMUSG00000015365	962.633	1205.64	-0.31021	5.5122e-06	0.00024823	Mov10l1	protein_coding	Moloney leukemia virus 10-like 1 [Source:MGI Symbol;Acc:MGI:1891384]
ENSMUSG00000022498	307.907	228.758	0.39705	5.5734e-06	0.00025016	Txndc11	protein_coding	thioredoxin domain containing 11 [Source:MGI Symbol;Acc:MGI:1923620]
ENSMUSG00000021754	337.736	227.35	0.49504	5.6804e-06	0.00025411	Map3k1	protein_coding	mitogen-activated protein kinase kinase kinase 1 [Source:MGI Symbol;Acc:MGI:1346872]
ENSMUSG00000040048	7305.15	8486.94	-0.21172	5.7868e-06	0.00025802	Ndufb10	protein_coding	NADH dehydrogenase (ubiquinone) 1 beta subcomplex, 10 [Source:MGI Symbol;Acc:MGI:1915592]
ENSMUSG00000032802	480.258	339.197	0.44917	5.8961e-06	0.00026174	Srxn1	protein_coding	sulfiredoxin 1 homolog (S. cerevisiae) [Source:MGI Symbol;Acc:MGI:104971]
ENSMUSG00000031618	372.213	498.078	-0.39006	5.9091e-06	0.00026174	Nr3c2	protein_coding	nuclear receptor subfamily 3, group C, member 2 [Source:MGI Symbol;Acc:MGI:99459]
ENSMUSG00000022865	587.771	447.717	0.36622	5.9776e-06	0.00026391	Cxadr	protein_coding	coxsackie virus and adenovirus receptor [Source:MGI Symbol;Acc:MGI:1201679]
ENSMUSG00000043953	221.043	377.738	-0.60242	6.1746e-06	0.00027172	Ccrl2	protein_coding	chemokine (C-C motif) receptor-like 2 [Source:MGI Symbol;Acc:MGI:1920904]
ENSMUSG00000029544	56.5765	26.8347	0.69435	6.3076e-06	0.00027578	Cabp1	protein_coding	calcium binding protein 1 [Source:MGI Symbol;Acc:MGI:1352750]
ENSMUSG00000043631	500.25	378.221	0.3737	6.2965e-06	0.00027578	Ecm2	protein_coding	extracellular matrix protein 2, female organ and adipocyte specific [Source:MGI Symbol;Acc:MGI:3039578]
ENSMUSG00000071656	66.1906	110.927	-0.59004	6.3771e-06	0.00027792	Lrrn4cl	protein_coding	LRRN4 C-terminal like [Source:MGI Symbol;Acc:MGI:1916102]
ENSMUSG00000028809	1098.23	856.979	0.33802	6.5512e-06	0.00028459	Srrm1	protein_coding	serine/arginine repetitive matrix 1 [Source:MGI Symbol;Acc:MGI:1858303]
ENSMUSG00000018379	1505.4	1121.5	0.3921	6.5837e-06	0.00028508	Srsf1	protein_coding	serine/arginine-rich splicing factor 1 [Source:MGI Symbol;Acc:MGI:98283]
ENSMUSG00000068220	3612.63	4582.08	-0.32493	6.6206e-06	0.00028577	Lgals1	protein_coding	lectin, galactose binding, soluble 1 [Source:MGI Symbol;Acc:MGI:96777]
ENSMUSG00000030223	71.5756	34.963	0.68526	6.7665e-06	0.00029113	Ptpro	protein_coding	protein tyrosine phosphatase, receptor type, O [Source:MGI Symbol;Acc:MGI:1097152]
ENSMUSG00000030591	1253.4	1468.87	-0.22372	6.832e-06	0.00029295	Psmd8	protein_coding	proteasome (prosome, macropain) 26S subunit, non-ATPase, 8 [Source:MGI Symbol;Acc:MGI:1888669]
ENSMUSG00000005150	483.442	612.021	-0.32348	6.8522e-06	0.00029295	Wdr83	protein_coding	WD repeat domain containing 83 [Source:MGI Symbol;Acc:MGI:1915086]
ENSMUSG00000020069	583.495	464.533	0.31277	6.8877e-06	0.00029354	Hnrnph3	protein_coding	heterogeneous nuclear ribonucleoprotein H3 [Source:MGI Symbol;Acc:MGI:1926462]
ENSMUSG00000027858	249.84	186.366	0.38865	7.0792e-06	0.00030076	Tspan2	protein_coding	tetraspanin 2 [Source:MGI Symbol;Acc:MGI:1917997]
ENSMUSG00000009418	504.759	372.877	0.39912	7.1335e-06	0.00030211	Nav1	protein_coding	neuron navigator 1 [Source:MGI Symbol;Acc:MGI:2183683]
ENSMUSG00000020180	1125.49	1359.51	-0.26338	7.3783e-06	0.0003115	Snrpd3	protein_coding	small nuclear ribonucleoprotein D3 [Source:MGI Symbol;Acc:MGI:1914582]
ENSMUSG00000021190	1268.47	1548.13	-0.27679	7.7245e-06	0.0003251	Lgmn	protein_coding	legumain [Source:MGI Symbol;Acc:MGI:1330838]
ENSMUSG00000054499	177.19	279.802	-0.54436	7.8791e-06	0.00033058	Dedd2	protein_coding	death effector domain-containing DNA binding protein 2 [Source:MGI Symbol;Acc:MGI:1914629]
ENSMUSG00000046785	716.237	581.335	0.2894	8.1e-06	0.0003388	Epm2aip1	protein_coding	EPM2A (laforin) interacting protein 1 [Source:MGI Symbol;Acc:MGI:1925031]
ENSMUSG00000024664	1017.16	1273.09	-0.30844	8.1412e-06	0.00033947	Fads3	protein_coding	fatty acid desaturase 3 [Source:MGI Symbol;Acc:MGI:1928740]
ENSMUSG00000024952	415.331	543.672	-0.36243	8.2622e-06	0.00034346	Rps6ka4	protein_coding	ribosomal protein S6 kinase, polypeptide 4 [Source:MGI Symbol;Acc:MGI:1930076]
ENSMUSG00000025428	83700.4	95077.7	-0.18091	8.518e-06	0.000353	Atp5a1	protein_coding	ATP synthase, H+ transporting, mitochondrial F1 complex, alpha subunit 1 [Source:MGI Symbol;Acc:MGI:88115]
ENSMUSG00000025558	648.292	512.413	0.32234	8.6297e-06	0.00035604	Dock9	protein_coding	dedicator of cytokinesis 9 [Source:MGI Symbol;Acc:MGI:106321]
ENSMUSG00000002500	3620.18	4567.26	-0.31795	8.6439e-06	0.00035604	Rpl3l	protein_coding	ribosomal protein L3-like [Source:MGI Symbol;Acc:MGI:1913461]
ENSMUSG00000021102	2398.65	3007.08	-0.31026	8.6925e-06	0.00035695	Glrx5	protein_coding	glutaredoxin 5 homolog (S. cerevisiae) [Source:MGI Symbol;Acc:MGI:1920296]
ENSMUSG00000027219	581.541	401.901	0.46718	8.7563e-06	0.00035848	Slc28a2	protein_coding	solute carrier family 28 (sodium-coupled nucleoside transporter), member 2 [Source:MGI Symbol;Acc:MGI:1913105]
ENSMUSG00000021241	835.369	993.385	-0.24241	8.9377e-06	0.0003648	Isca2	protein_coding	iron-sulfur cluster assembly 2 homolog (S. cerevisiae) [Source:MGI Symbol;Acc:MGI:1921566]
ENSMUSG00000033581	66.1346	35.4988	0.64384	9.1089e-06	0.00037067	Igf2bp2	protein_coding	insulin-like growth factor 2 mRNA binding protein 2 [Source:MGI Symbol;Acc:MGI:1890358]
ENSMUSG00000026313	362.769	532.885	-0.48081	9.2249e-06	0.00037426	Hdac4	protein_coding	histone deacetylase 4 [Source:MGI Symbol;Acc:MGI:3036234]
ENSMUSG00000043991	993.1	813.968	0.27568	9.4994e-06	0.00038424	Pura	protein_coding	purine rich element binding protein A [Source:MGI Symbol;Acc:MGI:103079]
ENSMUSG00000040521	570.885	705.533	-0.29243	9.5603e-06	0.00038555	Tsfm	protein_coding	Ts translation elongation factor, mitochondrial [Source:MGI Symbol;Acc:MGI:1913649]
ENSMUSG00000026042	394.549	305.076	0.34951	9.9122e-06	0.00039855	Col5a2	protein_coding	collagen, type V, alpha 2 [Source:MGI Symbol;Acc:MGI:88458]
ENSMUSG00000006818	9796.02	10954.4	-0.15928	1.0066e-05	0.00040353	Sod2	protein_coding	superoxide dismutase 2, mitochondrial [Source:MGI Symbol;Acc:MGI:98352]
ENSMUSG00000055489	23.2116	49.356	-0.68453	1.0106e-05	0.00040396	Ano5	protein_coding	anoctamin 5 [Source:MGI Symbol;Acc:MGI:3576659]
ENSMUSG00000074415	84.5785	42.503	0.6674	1.0425e-05	0.00041548	2610203C20Rik	processed_transcript	RIKEN cDNA 2610203C20 gene [Source:MGI Symbol;Acc:MGI:1917705]
ENSMUSG00000026222	471.712	323.447	0.47434	1.0654e-05	0.00042335	Sp100	protein_coding	nuclear antigen Sp100 [Source:MGI Symbol;Acc:MGI:109561]
ENSMUSG00000045868	55.1598	22.9882	0.70306	1.0764e-05	0.00042645	Gvin1	protein_coding	GTPase, very large interferon inducible 1 [Source:MGI Symbol;Acc:MGI:1921808]
ENSMUSG00000042605	852.225	680.133	0.30964	1.0915e-05	0.00043119	Atxn2	protein_coding	ataxin 2 [Source:MGI Symbol;Acc:MGI:1277223]
ENSMUSG00000040225	844.829	672.2	0.31311	1.1425e-05	0.00044655	Prrc2c	protein_coding	proline-rich coiled-coil 2C [Source:MGI Symbol;Acc:MGI:1913754]
ENSMUSG00000066900	1369.55	1592.2	-0.21245	1.1436e-05	0.00044655	Suds3	protein_coding	suppressor of defective silencing 3 homolog (S. cerevisiae) [Source:MGI Symbol;Acc:MGI:1919204]
ENSMUSG00000011148	2576.34	3218.99	-0.30569	1.1351e-05	0.00044655	Adssl1	protein_coding	adenylosuccinate synthetase like 1 [Source:MGI Symbol;Acc:MGI:87947]
ENSMUSG00000032875	1419.93	1794.33	-0.31971	1.1415e-05	0.00044655	Arhgef17	protein_coding	Rho guanine nucleotide exchange factor (GEF) 17 [Source:MGI Symbol;Acc:MGI:2673002]
ENSMUSG00000031016	219.52	389.178	-0.61566	1.1502e-05	0.00044783	Wee1	protein_coding	WEE 1 homolog 1 (S. pombe) [Source:MGI Symbol;Acc:MGI:103075]
ENSMUSG00000040797	50.0372	25.0069	0.66551	1.1753e-05	0.00045626	Iqsec3	protein_coding	IQ motif and Sec7 domain 3 [Source:MGI Symbol;Acc:MGI:2677208]
ENSMUSG00000021196	835.909	661.679	0.31942	1.1806e-05	0.000457	Pfkp	protein_coding	phosphofructokinase, platelet [Source:MGI Symbol;Acc:MGI:1891833]
ENSMUSG00000078190	36.9972	12.6353	0.70317	1.1964e-05	0.00046183	Dnm3os	antisense	dynamin 3, opposite strand [Source:MGI Symbol;Acc:MGI:3052332]
ENSMUSG00000071042	551.12	426.322	0.34757	1.2127e-05	0.00046678	Rasgrp3	protein_coding	RAS, guanyl releasing protein 3 [Source:MGI Symbol;Acc:MGI:3028579]
ENSMUSG00000011752	1651.9	1275.05	0.34999	1.2189e-05	0.00046784	Pgam1	protein_coding	phosphoglycerate mutase 1 [Source:MGI Symbol;Acc:MGI:97552]
ENSMUSG00000039997	435.009	280.979	0.52519	1.2649e-05	0.00048353	Ifi203	protein_coding	interferon activated gene 203 [Source:MGI Symbol;Acc:MGI:96428]
ENSMUSG00000020074	836.115	629.832	0.37786	1.267e-05	0.00048353	Ccar1	protein_coding	cell division cycle and apoptosis regulator 1 [Source:MGI Symbol;Acc:MGI:1914750]
ENSMUSG00000022265	3041.08	3726.41	-0.28118	1.2963e-05	0.00049332	Ank	protein_coding	progressive ankylosis [Source:MGI Symbol;Acc:MGI:3045421]
ENSMUSG00000037458	1382.34	1104.11	0.30854	1.31e-05	0.00049713	Azin1	protein_coding	antizyme inhibitor 1 [Source:MGI Symbol;Acc:MGI:1859169]
ENSMUSG00000013593	19290.8	22763	-0.2321	1.3204e-05	0.00049969	Ndufs2	protein_coding	NADH dehydrogenase (ubiquinone) Fe-S protein 2 [Source:MGI Symbol;Acc:MGI:2385112]
ENSMUSG00000061461	1175.26	1426.24	-0.26923	1.3326e-05	0.00050287	Smim20	protein_coding	small integral membrane protein 20 [Source:MGI Symbol;Acc:MGI:1913528]
ENSMUSG00000000275	572.644	459.969	0.30045	1.3509e-05	0.00050836	Trim25	protein_coding	tripartite motif-containing 25 [Source:MGI Symbol;Acc:MGI:102749]
ENSMUSG00000070570	516.593	736.628	-0.4509	1.3591e-05	0.00051005	Slc17a7	protein_coding	solute carrier family 17 (sodium-dependent inorganic phosphate cotransporter), member 7 [Source:MGI Symbol;Acc:MGI:1920211]
ENSMUSG00000022210	1798.84	2148.79	-0.24843	1.4149e-05	0.00052953	Dhrs4	protein_coding	dehydrogenase/reductase (SDR family) member 4 [Source:MGI Symbol;Acc:MGI:90169]
ENSMUSG00000002342	1017.94	1283.04	-0.31678	1.4511e-05	0.00054157	Tmem161a	protein_coding	transmembrane protein 161A [Source:MGI Symbol;Acc:MGI:2384577]
ENSMUSG00000001508	2170.08	2604.32	-0.25409	1.5271e-05	0.0005668	Sgca	protein_coding	sarcoglycan, alpha (dystrophin-associated glycoprotein) [Source:MGI Symbol;Acc:MGI:894698]
ENSMUSG00000075706	8660.63	10423	-0.25779	1.5259e-05	0.0005668	Gpx4	protein_coding	glutathione peroxidase 4 [Source:MGI Symbol;Acc:MGI:104767]
ENSMUSG00000031465	104.862	62.1446	0.58442	1.5363e-05	0.0005671	Angpt2	protein_coding	angiopoietin 2 [Source:MGI Symbol;Acc:MGI:1202890]
ENSMUSG00000005087	191.058	125.548	0.50973	1.5327e-05	0.0005671	Cd44	protein_coding	CD44 antigen [Source:MGI Symbol;Acc:MGI:88338]
ENSMUSG00000040249	2803.21	2450.55	0.19096	1.5486e-05	0.00057005	Lrp1	protein_coding	low density lipoprotein receptor-related protein 1 [Source:MGI Symbol;Acc:MGI:96828]
ENSMUSG00000026185	3285.42	2758.24	0.24429	1.5539e-05	0.00057045	Igfbp5	protein_coding	insulin-like growth factor binding protein 5 [Source:MGI Symbol;Acc:MGI:96440]
ENSMUSG00000001494	89.8214	47.5038	0.64003	1.5806e-05	0.00057868	Sost	protein_coding	sclerostin [Source:MGI Symbol;Acc:MGI:1921749]
ENSMUSG00000024006	538.818	386.779	0.42923	1.588e-05	0.00057982	Stk38	protein_coding	serine/threonine kinase 38 [Source:MGI Symbol;Acc:MGI:2442572]
ENSMUSG00000037526	170.384	229.614	-0.39276	1.6164e-05	0.0005886	Atg14	protein_coding	autophagy related 14 [Source:MGI Symbol;Acc:MGI:1261775]
ENSMUSG00000024158	852.472	1035.71	-0.26987	1.6324e-05	0.00059258	Hagh	protein_coding	hydroxyacyl glutathione hydrolase [Source:MGI Symbol;Acc:MGI:95745]
ENSMUSG00000036620	1060.24	1334.55	-0.31485	1.6361e-05	0.00059258	Mgat4b	protein_coding	mannoside acetylglucosaminyltransferase 4, isoenzyme B [Source:MGI Symbol;Acc:MGI:2143974]
ENSMUSG00000021646	1025.31	1211.23	-0.23411	1.6477e-05	0.00059521	Mccc2	protein_coding	methylcrotonoyl-Coenzyme A carboxylase 2 (beta) [Source:MGI Symbol;Acc:MGI:1925288]
ENSMUSG00000063146	279.136	203.312	0.41496	1.665e-05	0.00059826	Clip2	protein_coding	CAP-GLY domain containing linker protein 2 [Source:MGI Symbol;Acc:MGI:1313136]
ENSMUSG00000001870	1033.35	1222.71	-0.23584	1.6612e-05	0.00059826	Ltbp1	protein_coding	latent transforming growth factor beta binding protein 1 [Source:MGI Symbol;Acc:MGI:109151]
ENSMUSG00000047246	119.702	74.7345	0.5494	1.6798e-05	0.00059879	Hist1h2be	protein_coding	histone cluster 1, H2be [Source:MGI Symbol;Acc:MGI:2448380]
ENSMUSG00000020836	4871.09	3277.85	0.48865	1.6756e-05	0.00059879	Coro6	protein_coding	coronin 6 [Source:MGI Symbol;Acc:MGI:2183448]
ENSMUSG00000036181	2181.07	1778.52	0.28127	1.6782e-05	0.00059879	Hist1h1c	protein_coding	histone cluster 1, H1c [Source:MGI Symbol;Acc:MGI:1931526]
ENSMUSG00000049866	210.365	133.782	0.53369	1.7056e-05	0.00060639	Arl4c	protein_coding	ADP-ribosylation factor-like 4C [Source:MGI Symbol;Acc:MGI:2445172]
ENSMUSG00000030751	1785.7	2076.41	-0.21259	1.7119e-05	0.00060702	Psma1	protein_coding	proteasome (prosome, macropain) subunit, alpha type 1 [Source:MGI Symbol;Acc:MGI:1347005]
ENSMUSG00000024949	1658.73	1358.51	0.27715	1.7192e-05	0.00060804	Sf1	protein_coding	splicing factor 1 [Source:MGI Symbol;Acc:MGI:1095403]
ENSMUSG00000024181	1636.02	1985.39	-0.26844	1.7763e-05	0.00062658	Mrpl28	protein_coding	mitochondrial ribosomal protein L28 [Source:MGI Symbol;Acc:MGI:1915861]
ENSMUSG00000036395	38.159	13.429	0.68897	1.8043e-05	0.00063316	Glb1l2	protein_coding	galactosidase, beta 1-like 2 [Source:MGI Symbol;Acc:MGI:2388283]
ENSMUSG00000055485	219.291	146.569	0.49171	1.802e-05	0.00063316	Soga1	protein_coding	suppressor of glucose, autophagy associated 1 [Source:MGI Symbol;Acc:MGI:2444575]
ENSMUSG00000003476	389.008	566.261	-0.46993	1.8409e-05	0.00064432	Crhr2	protein_coding	corticotropin releasing hormone receptor 2 [Source:MGI Symbol;Acc:MGI:894312]
ENSMUSG00000044080	7768.44	9117.33	-0.2247	1.8592e-05	0.00064542	S100a1	protein_coding	S100 calcium binding protein A1 [Source:MGI Symbol;Acc:MGI:1338917]
ENSMUSG00000031987	5982.86	7081.33	-0.23587	1.8632e-05	0.00064542	Egln1	protein_coding	egl-9 family hypoxia-inducible factor 1 [Source:MGI Symbol;Acc:MGI:1932286]
ENSMUSG00000008136	16167.7	20274.7	-0.30925	1.8573e-05	0.00064542	Fhl2	protein_coding	four and a half LIM domains 2 [Source:MGI Symbol;Acc:MGI:1338762]
ENSMUSG00000038086	1301.83	1765.25	-0.39909	1.8623e-05	0.00064542	Hspb2	protein_coding	heat shock protein 2 [Source:MGI Symbol;Acc:MGI:1916503]
ENSMUSG00000062373	3532.41	4224.39	-0.24968	1.8972e-05	0.00065553	Tmem65	protein_coding	transmembrane protein 65 [Source:MGI Symbol;Acc:MGI:1922118]
ENSMUSG00000027602	10050.9	12983.6	-0.3446	1.924e-05	0.0006631	Map1lc3a	protein_coding	microtubule-associated protein 1 light chain 3 alpha [Source:MGI Symbol;Acc:MGI:1915661]
ENSMUSG00000037049	2172.41	2612.26	-0.25673	1.9713e-05	0.00067661	Smpd1	protein_coding	sphingomyelin phosphodiesterase 1, acid lysosomal [Source:MGI Symbol;Acc:MGI:98325]
ENSMUSG00000030103	527.752	822.528	-0.52591	1.9732e-05	0.00067661	Bhlhe40	protein_coding	basic helix-loop-helix family, member e40 [Source:MGI Symbol;Acc:MGI:1097714]
ENSMUSG00000022889	1270.17	1514.36	-0.24616	2.0397e-05	0.00069764	Mrpl39	protein_coding	mitochondrial ribosomal protein L39 [Source:MGI Symbol;Acc:MGI:1351620]
ENSMUSG00000026766	1680.13	1985.04	-0.23368	2.0621e-05	0.0007022	Mmadhc	protein_coding	methylmalonic aciduria (cobalamin deficiency) cblD type, with homocystinuria [Source:MGI Symbol;Acc:MGI:1923786]
ENSMUSG00000040128	1077.53	1476.69	-0.40962	2.0635e-05	0.0007022	Pnrc1	protein_coding	proline-rich nuclear receptor coactivator 1 [Source:MGI Symbol;Acc:MGI:1917838]
ENSMUSG00000027339	233.069	160.888	0.46588	2.0782e-05	0.00070542	Rassf2	protein_coding	Ras association (RalGDS/AF-6) domain family member 2 [Source:MGI Symbol;Acc:MGI:2442060]
ENSMUSG00000030652	1791.01	2171.66	-0.26726	2.1002e-05	0.00070935	Coq7	protein_coding	demethyl-Q 7 [Source:MGI Symbol;Acc:MGI:107207]
ENSMUSG00000096472	292.348	374.156	-0.33279	2.0958e-05	0.00070935	Cdkn2d	protein_coding	cyclin-dependent kinase inhibitor 2D (p19, inhibits CDK4) [Source:MGI Symbol;Acc:MGI:105387]
ENSMUSG00000070583	142.332	86.7221	0.56417	2.1427e-05	0.00071923	Fv1	protein_coding	Friend virus susceptibility 1 [Source:MGI Symbol;Acc:MGI:95595]
ENSMUSG00000029298	281.04	172.41	0.55529	2.1448e-05	0.00071923	Gbp9	protein_coding	guanylate-binding protein 9 [Source:MGI Symbol;Acc:MGI:3605620]
ENSMUSG00000020585	8778.89	9644.47	-0.13441	2.1454e-05	0.00071923	Laptm4a	protein_coding	lysosomal-associated protein transmembrane 4A [Source:MGI Symbol;Acc:MGI:108017]
ENSMUSG00000025220	1689.08	1305.24	0.34655	2.1641e-05	0.00072367	Mgea5	protein_coding	meningioma expressed antigen 5 (hyaluronidase) [Source:MGI Symbol;Acc:MGI:1932139]
ENSMUSG00000037364	816.83	626.452	0.35685	2.1731e-05	0.0007249	Srrt	protein_coding	serrate RNA effector molecule homolog (Arabidopsis) [Source:MGI Symbol;Acc:MGI:1933527]
ENSMUSG00000005397	2048.66	1711.8	0.25052	2.1998e-05	0.00073201	Nid1	protein_coding	nidogen 1 [Source:MGI Symbol;Acc:MGI:97342]
ENSMUSG00000046671	2186.21	2537.81	-0.20999	2.243e-05	0.00074455	Mtfr1l	protein_coding	mitochondrial fission regulator 1-like [Source:MGI Symbol;Acc:MGI:1924074]
ENSMUSG00000025545	1412.29	1647.26	-0.21623	2.2721e-05	0.00075236	Clybl	protein_coding	citrate lyase beta like [Source:MGI Symbol;Acc:MGI:1916884]
ENSMUSG00000057531	1304.15	1646.61	-0.31719	2.288e-05	0.00075578	Dtnbp1	protein_coding	dystrobrevin binding protein 1 [Source:MGI Symbol;Acc:MGI:2137586]
ENSMUSG00000056481	209.719	150.354	0.42598	2.3135e-05	0.00076234	Cd248	protein_coding	CD248 antigen, endosialin [Source:MGI Symbol;Acc:MGI:1917695]
ENSMUSG00000028223	9263.65	10531.1	-0.18177	2.3736e-05	0.00078021	Decr1	protein_coding	2,4-dienoyl CoA reductase 1, mitochondrial [Source:MGI Symbol;Acc:MGI:1914710]
ENSMUSG00000033707	1109.04	1430.93	-0.3431	2.3846e-05	0.00078193	Lrrc24	protein_coding	leucine rich repeat containing 24 [Source:MGI Symbol;Acc:MGI:3605040]
ENSMUSG00000020949	1860.88	2237.03	-0.25646	2.4577e-05	0.00080396	Fkbp3	protein_coding	FK506 binding protein 3 [Source:MGI Symbol;Acc:MGI:1353460]
ENSMUSG00000059714	3720.54	4553.02	-0.27861	2.4911e-05	0.00081291	Flot1	protein_coding	flotillin 1 [Source:MGI Symbol;Acc:MGI:1100500]
ENSMUSG00000046480	661.194	1006.73	-0.5056	2.5413e-05	0.00082729	Scn4b	protein_coding	sodium channel, type IV, beta [Source:MGI Symbol;Acc:MGI:2687406]
ENSMUSG00000002949	1593.08	1815.35	-0.1852	2.6224e-05	0.00085165	Timm44	protein_coding	translocase of inner mitochondrial membrane 44 [Source:MGI Symbol;Acc:MGI:1343262]
ENSMUSG00000038914	622.957	506.163	0.28489	2.6313e-05	0.00085213	Dido1	protein_coding	death inducer-obliterator 1 [Source:MGI Symbol;Acc:MGI:1344352]
ENSMUSG00000022215	1299.28	1833.47	-0.43804	2.6365e-05	0.00085213	Fitm1	protein_coding	fat storage-inducing transmembrane protein 1 [Source:MGI Symbol;Acc:MGI:1915930]
ENSMUSG00000020658	262.567	157.618	0.56598	2.6767e-05	0.00085897	Efr3b	protein_coding	EFR3 homolog B (S. cerevisiae) [Source:MGI Symbol;Acc:MGI:2444851]
ENSMUSG00000054435	389.662	292.782	0.3757	2.6672e-05	0.00085897	Gimap4	protein_coding	GTPase, IMAP family member 4 [Source:MGI Symbol;Acc:MGI:1349656]
ENSMUSG00000017765	674.585	864.798	-0.33474	2.6757e-05	0.00085897	Slc12a4	protein_coding	solute carrier family 12, member 4 [Source:MGI Symbol;Acc:MGI:1309465]
ENSMUSG00000025393	102373	113881	-0.15173	2.7154e-05	0.00086931	Atp5b	protein_coding	ATP synthase, H+ transporting mitochondrial F1 complex, beta subunit [Source:MGI Symbol;Acc:MGI:107801]
ENSMUSG00000025208	773.09	944.421	-0.27713	2.7516e-05	0.00087881	Mrpl43	protein_coding	mitochondrial ribosomal protein L43 [Source:MGI Symbol;Acc:MGI:2137229]
ENSMUSG00000021273	838.55	996.293	-0.24159	2.7626e-05	0.00088025	Fdft1	protein_coding	farnesyl diphosphate farnesyl transferase 1 [Source:MGI Symbol;Acc:MGI:102706]
ENSMUSG00000025041	669.652	543.24	0.28847	2.7852e-05	0.00088537	Nt5c2	protein_coding	5'-nucleotidase, cytosolic II [Source:MGI Symbol;Acc:MGI:2178563]
ENSMUSG00000044716	737.148	552.015	0.38073	2.8387e-05	0.00089397	Dok7	protein_coding	docking protein 7 [Source:MGI Symbol;Acc:MGI:3584043]
ENSMUSG00000037989	951.849	1211.17	-0.32601	2.8351e-05	0.00089397	Wnk2	protein_coding	WNK lysine deficient protein kinase 2 [Source:MGI Symbol;Acc:MGI:1922857]
ENSMUSG00000028111	105.742	151.075	-0.44762	2.8308e-05	0.00089397	Ctsk	protein_coding	cathepsin K [Source:MGI Symbol;Acc:MGI:107823]
ENSMUSG00000056071	10.5942	29.6689	-0.67267	2.8354e-05	0.00089397	S100a9	protein_coding	S100 calcium binding protein A9 (calgranulin B) [Source:MGI Symbol;Acc:MGI:1338947]
ENSMUSG00000022400	1258.13	1506.26	-0.25046	2.8564e-05	0.00089571	Rbx1	protein_coding	ring-box 1 [Source:MGI Symbol;Acc:MGI:1891829]
ENSMUSG00000001751	162.259	217.994	-0.38708	2.8575e-05	0.00089571	Naglu	protein_coding	alpha-N-acetylglucosaminidase (Sanfilippo disease IIIB) [Source:MGI Symbol;Acc:MGI:1351641]
ENSMUSG00000044986	202.458	268.817	-0.37432	2.8866e-05	0.00090272	Tst	protein_coding	thiosulfate sulfurtransferase, mitochondrial [Source:MGI Symbol;Acc:MGI:98852]
ENSMUSG00000020190	3506.23	4410.49	-0.31205	2.9038e-05	0.000906	Mknk2	protein_coding	MAP kinase-interacting serine/threonine kinase 2 [Source:MGI Symbol;Acc:MGI:894279]
ENSMUSG00000068735	561.04	343.525	0.55496	2.9117e-05	0.00090611	Trp53i11	protein_coding	transformation related protein 53 inducible protein 11 [Source:MGI Symbol;Acc:MGI:2670995]
ENSMUSG00000039481	832.286	1167.53	-0.43179	2.9175e-05	0.00090611	Nrtn	protein_coding	neurturin [Source:MGI Symbol;Acc:MGI:108417]
ENSMUSG00000057606	155.786	93.6765	0.56171	2.9261e-05	0.00090668	Colq	protein_coding	collagen-like tail subunit (single strand of homotrimer) of asymmetric acetylcholinesterase [Source:MGI Symbol;Acc:MGI:1338761]
ENSMUSG00000007850	2446.23	1901.08	0.33944	2.9561e-05	0.00091205	Hnrnph1	protein_coding	heterogeneous nuclear ribonucleoprotein H1 [Source:MGI Symbol;Acc:MGI:1891925]
ENSMUSG00000005873	5149.88	5807.14	-0.17068	2.9569e-05	0.00091205	Reep5	protein_coding	receptor accessory protein 5 [Source:MGI Symbol;Acc:MGI:1270152]
ENSMUSG00000053617	1072.5	812.904	0.3676	2.9709e-05	0.00091427	Sh3pxd2a	protein_coding	SH3 and PX domains 2A [Source:MGI Symbol;Acc:MGI:1298393]
ENSMUSG00000070424	271.496	382.521	-0.43517	2.9915e-05	0.00091853	Art5	protein_coding	ADP-ribosyltransferase 5 [Source:MGI Symbol;Acc:MGI:107948]
ENSMUSG00000045316	1099.59	1343.63	-0.27664	3.0356e-05	0.00092994	Fahd1	protein_coding	fumarylacetoacetate hydrolase domain containing 1 [Source:MGI Symbol;Acc:MGI:1915886]
ENSMUSG00000030016	663.973	517.818	0.33639	3.0783e-05	0.0009409	Zfml	protein_coding	zinc finger, matrin-like [Source:MGI Symbol;Acc:MGI:1203484]
ENSMUSG00000046318	134.867	191.156	-0.44228	3.0921e-05	0.00094299	Ccbe1	protein_coding	collagen and calcium binding EGF domains 1 [Source:MGI Symbol;Acc:MGI:2445053]
ENSMUSG00000030401	1489.53	1897.92	-0.3275	3.1547e-05	0.00095991	Rtn2	protein_coding	reticulon 2 (Z-band associated protein) [Source:MGI Symbol;Acc:MGI:107612]
ENSMUSG00000014633	563.233	705.53	-0.30718	3.1755e-05	0.00096406	Cmc2	protein_coding	COX assembly mitochondrial protein 2 [Source:MGI Symbol;Acc:MGI:1913781]
ENSMUSG00000034245	552.463	706.54	-0.33213	3.1938e-05	0.00096746	Hdac11	protein_coding	histone deacetylase 11 [Source:MGI Symbol;Acc:MGI:2385252]
ENSMUSG00000038845	4558.1	5343.74	-0.22293	3.204e-05	0.00096835	Phb	protein_coding	prohibitin [Source:MGI Symbol;Acc:MGI:97572]
ENSMUSG00000042364	552.764	442.348	0.30217	3.2463e-05	0.00097678	Snx18	protein_coding	sorting nexin 18 [Source:MGI Symbol;Acc:MGI:2137642]
ENSMUSG00000040850	3108.46	3921.39	-0.3153	3.2421e-05	0.00097678	Psme4	protein_coding	proteasome (prosome, macropain) activator subunit 4 [Source:MGI Symbol;Acc:MGI:2143994]
ENSMUSG00000079243	3100.73	2432.82	0.32772	3.2536e-05	0.0009768	Xirp1	protein_coding	xin actin-binding repeat containing 1 [Source:MGI Symbol;Acc:MGI:1333878]
ENSMUSG00000044894	13610	17593.3	-0.34403	3.2686e-05	0.00097912	Uqcrq	protein_coding	ubiquinol-cytochrome c reductase, complex III subunit VII [Source:MGI Symbol;Acc:MGI:107807]
ENSMUSG00000016308	581.957	699.105	-0.25305	3.2791e-05	0.00098009	Ube2a	protein_coding	ubiquitin-conjugating enzyme E2A [Source:MGI Symbol;Acc:MGI:102959]
ENSMUSG00000027800	1743.88	1337.27	0.35317	3.3732e-05	0.001006	Tm4sf1	protein_coding	transmembrane 4 superfamily member 1 [Source:MGI Symbol;Acc:MGI:104678]
ENSMUSG00000026069	25.5511	10.5162	0.66587	3.4492e-05	0.0010219	Il1rl1	protein_coding	interleukin 1 receptor-like 1 [Source:MGI Symbol;Acc:MGI:98427]
ENSMUSG00000041025	130.41	85.1805	0.50607	3.4539e-05	0.0010219	Iffo2	protein_coding	intermediate filament family orphan 2 [Source:MGI Symbol;Acc:MGI:2140675]
ENSMUSG00000062580	2219.65	2557.47	-0.20006	3.442e-05	0.0010219	Timm17a	protein_coding	translocase of inner mitochondrial membrane 17a [Source:MGI Symbol;Acc:MGI:1343131]
ENSMUSG00000040666	3156.75	3764.44	-0.24501	3.4567e-05	0.0010219	Sh3bgr	protein_coding	SH3-binding domain glutamic acid-rich protein [Source:MGI Symbol;Acc:MGI:1354740]
ENSMUSG00000026154	559.884	687.128	-0.28306	3.4863e-05	0.0010284	1110058L19Rik	protein_coding	RIKEN cDNA 1110058L19 gene [Source:MGI Symbol;Acc:MGI:1915252]
ENSMUSG00000027406	12412.4	14162.1	-0.18656	3.51e-05	0.0010331	Idh3b	protein_coding	isocitrate dehydrogenase 3 (NAD+) beta [Source:MGI Symbol;Acc:MGI:2158650]
ENSMUSG00000030869	6320.96	7398.89	-0.22077	3.522e-05	0.0010344	Ndufab1	protein_coding	NADH dehydrogenase (ubiquinone) 1, alpha/beta subcomplex, 1 [Source:MGI Symbol;Acc:MGI:1917566]
ENSMUSG00000079508	1970.02	2293.55	-0.214	3.5541e-05	0.0010416	Apoo	protein_coding	apolipoprotein O [Source:MGI Symbol;Acc:MGI:1915566]
ENSMUSG00000089824	147.983	104.858	0.43807	3.5839e-05	0.001046	Rbm12	protein_coding	RNA binding motif protein 12 [Source:MGI Symbol;Acc:MGI:1922960]
ENSMUSG00000015377	307.775	237.527	0.34871	3.6064e-05	0.001046	Dennd6b	protein_coding	DENN/MADD domain containing 6B [Source:MGI Symbol;Acc:MGI:1916690]
ENSMUSG00000022890	14696.8	17469.6	-0.2409	3.6081e-05	0.001046	Atp5j	protein_coding	ATP synthase, H+ transporting, mitochondrial F0 complex, subunit F [Source:MGI Symbol;Acc:MGI:107777]
ENSMUSG00000050552	617.324	748.458	-0.26684	3.592e-05	0.001046	Lamtor4	protein_coding	late endosomal/lysosomal adaptor, MAPK and MTOR activator 4 [Source:MGI Symbol;Acc:MGI:1913346]
ENSMUSG00000078815	40.6288	85.0392	-0.64846	3.6027e-05	0.001046	Cacng6	protein_coding	calcium channel, voltage-dependent, gamma subunit 6 [Source:MGI Symbol;Acc:MGI:1859168]
ENSMUSG00000004939	115.186	70.999	0.55057	3.6987e-05	0.00107	Nmrk2	protein_coding	nicotinamide riboside kinase 2 [Source:MGI Symbol;Acc:MGI:1916814]
ENSMUSG00000054752	1120.36	895.424	0.30585	3.7672e-05	0.0010875	Fsd1l	protein_coding	fibronectin type III and SPRY domain containing 1-like [Source:MGI Symbol;Acc:MGI:2442443]
ENSMUSG00000018882	962.639	1142.81	-0.23989	3.8153e-05	0.001099	Mrpl45	protein_coding	mitochondrial ribosomal protein L45 [Source:MGI Symbol;Acc:MGI:1914286]
ENSMUSG00000089989	60.2875	28.6995	0.64893	3.8563e-05	0.0011038	Flt3l	protein_coding	FMS-like tyrosine kinase 3 ligand [Source:MGI Symbol;Acc:MGI:95560]
ENSMUSG00000022816	1383.01	1161.31	0.24297	3.8558e-05	0.0011038	Fstl1	protein_coding	follistatin-like 1 [Source:MGI Symbol;Acc:MGI:102793]
ENSMUSG00000048755	636.192	781.322	-0.28312	3.8427e-05	0.0011038	Mcat	protein_coding	malonyl CoA:ACP acyltransferase (mitochondrial) [Source:MGI Symbol;Acc:MGI:2388651]
ENSMUSG00000018909	477.028	370.775	0.338	3.8943e-05	0.0011119	Arrb1	protein_coding	arrestin, beta 1 [Source:MGI Symbol;Acc:MGI:99473]
ENSMUSG00000022452	2509.65	3054.94	-0.27102	3.901e-05	0.0011119	Smdt1	protein_coding	single-pass membrane protein with aspartate rich tail 1 [Source:MGI Symbol;Acc:MGI:1916279]
ENSMUSG00000028427	561.452	393.079	0.44562	3.9482e-05	0.001123	Aqp7	protein_coding	aquaporin 7 [Source:MGI Symbol;Acc:MGI:1314647]
ENSMUSG00000075254	1743.25	1378.59	0.31841	3.9722e-05	0.001125	Heg1	protein_coding	HEG homolog 1 (zebrafish) [Source:MGI Symbol;Acc:MGI:1924696]
ENSMUSG00000040532	515.8	652.532	-0.31718	3.9683e-05	0.001125	Abhd11	protein_coding	abhydrolase domain containing 11 [Source:MGI Symbol;Acc:MGI:1916008]
ENSMUSG00000074890	253.052	191.36	0.36907	3.9943e-05	0.0011289	Lcmt2	protein_coding	leucine carboxyl methyltransferase 2 [Source:MGI Symbol;Acc:MGI:1353659]
ENSMUSG00000042284	358.288	264.545	0.39626	4.0445e-05	0.0011407	Itga1	protein_coding	integrin alpha 1 [Source:MGI Symbol;Acc:MGI:96599]
ENSMUSG00000006235	24.158	49.2481	-0.6389	4.0875e-05	0.0011505	Epor	protein_coding	erythropoietin receptor [Source:MGI Symbol;Acc:MGI:95408]
ENSMUSG00000000579	69.4647	40.9798	0.57066	4.1123e-05	0.001155	Dynlt1c	protein_coding	dynein light chain Tctex-type 1C [Source:MGI Symbol;Acc:MGI:3807476]
ENSMUSG00000057335	277.003	211.753	0.35613	4.1485e-05	0.0011628	Cep170	protein_coding	centrosomal protein 170 [Source:MGI Symbol;Acc:MGI:1918348]
ENSMUSG00000008690	1055.49	1241.82	-0.22762	4.1699e-05	0.0011664	Ncaph2	protein_coding	non-SMC condensin II complex, subunit H2 [Source:MGI Symbol;Acc:MGI:1289164]
ENSMUSG00000030399	11800.2	14046.6	-0.24261	4.2016e-05	0.0011728	Ckm	protein_coding	creatine kinase, muscle [Source:MGI Symbol;Acc:MGI:88413]
ENSMUSG00000075467	926.765	1129.16	-0.27249	4.2127e-05	0.0011735	Dnlz	protein_coding	DNL-type zinc finger [Source:MGI Symbol;Acc:MGI:106559]
ENSMUSG00000029864	1434.57	1700.15	-0.23685	4.2693e-05	0.0011868	Gstk1	protein_coding	glutathione S-transferase kappa 1 [Source:MGI Symbol;Acc:MGI:1923513]
ENSMUSG00000028648	4312.96	5108.03	-0.23612	4.3216e-05	0.0011974	Ndufs5	protein_coding	NADH dehydrogenase (ubiquinone) Fe-S protein 5 [Source:MGI Symbol;Acc:MGI:1890889]
ENSMUSG00000021622	24084.8	29539.3	-0.28048	4.3252e-05	0.0011974	Ckmt2	protein_coding	creatine kinase, mitochondrial 2 [Source:MGI Symbol;Acc:MGI:1923972]
ENSMUSG00000051790	253.915	195.309	0.35089	4.3525e-05	0.0012025	Nlgn2	protein_coding	neuroligin 2 [Source:MGI Symbol;Acc:MGI:2681835]
ENSMUSG00000024045	757.975	578.472	0.35951	4.5092e-05	0.0012432	Akap8	protein_coding	A kinase (PRKA) anchor protein 8 [Source:MGI Symbol;Acc:MGI:1928488]
ENSMUSG00000046756	1228.99	1487.45	-0.26379	4.5205e-05	0.0012438	Mrps7	protein_coding	mitchondrial ribosomal protein S7 [Source:MGI Symbol;Acc:MGI:1354367]
ENSMUSG00000025203	717.392	485.309	0.47698	4.5593e-05	0.0012515	Scd2	protein_coding	stearoyl-Coenzyme A desaturase 2 [Source:MGI Symbol;Acc:MGI:98240]
ENSMUSG00000026853	7857.03	9037.8	-0.19738	4.5671e-05	0.0012515	Crat	protein_coding	carnitine acetyltransferase [Source:MGI Symbol;Acc:MGI:109501]
ENSMUSG00000020402	15602.9	17193.9	-0.1386	4.5965e-05	0.001257	Vdac1	protein_coding	voltage-dependent anion channel 1 [Source:MGI Symbol;Acc:MGI:106919]
ENSMUSG00000063410	767.887	602.474	0.32585	4.7058e-05	0.0012844	Stk24	protein_coding	serine/threonine kinase 24 [Source:MGI Symbol;Acc:MGI:2385007]
ENSMUSG00000054312	1777.08	2126.89	-0.24905	4.7605e-05	0.0012967	Mrps21	protein_coding	mitochondrial ribosomal protein S21 [Source:MGI Symbol;Acc:MGI:1913542]
ENSMUSG00000023800	104.767	68.5792	0.501	4.8019e-05	0.0013027	Tiam2	protein_coding	T cell lymphoma invasion and metastasis 2 [Source:MGI Symbol;Acc:MGI:1344338]
ENSMUSG00000006717	2977.59	3574	-0.25313	4.7963e-05	0.0013027	Acot13	protein_coding	acyl-CoA thioesterase 13 [Source:MGI Symbol;Acc:MGI:1914084]
ENSMUSG00000027189	815.549	681.137	0.25088	4.8943e-05	0.0013251	Trim44	protein_coding	tripartite motif-containing 44 [Source:MGI Symbol;Acc:MGI:1931835]
ENSMUSG00000022546	662.748	898.119	-0.39472	4.9289e-05	0.0013318	Gpt	protein_coding	glutamic pyruvic transaminase, soluble [Source:MGI Symbol;Acc:MGI:95802]
ENSMUSG00000098912	30.66	12.8571	0.65096	5.2151e-05	0.0014046	1500004A13Rik	processed_transcript	RIKEN cDNA 1500004A13 gene [Source:MGI Symbol;Acc:MGI:2442808]
ENSMUSG00000020623	53.6958	85.7768	-0.53261	5.2192e-05	0.0014046	Map2k6	protein_coding	mitogen-activated protein kinase kinase 6 [Source:MGI Symbol;Acc:MGI:1346870]
ENSMUSG00000022223	1696.72	2046.65	-0.25989	5.3072e-05	0.0014247	Sdr39u1	protein_coding	short chain dehydrogenase/reductase family 39U, member 1 [Source:MGI Symbol;Acc:MGI:1916876]
ENSMUSG00000100691	138.436	197.339	-0.44638	5.3148e-05	0.0014247	RP23-410L16.1	lincRNA	RIKEN cDNA 2010320M18 gene [Source:MGI Symbol;Acc:MGI:1919343]
ENSMUSG00000030612	527.785	647.919	-0.28093	5.3603e-05	0.001434	Mrpl46	protein_coding	mitochondrial ribosomal protein L46 [Source:MGI Symbol;Acc:MGI:1914558]
ENSMUSG00000040711	157.582	102.925	0.5029	5.3744e-05	0.0014349	Sh3pxd2b	protein_coding	SH3 and PX domains 2B [Source:MGI Symbol;Acc:MGI:2442062]
ENSMUSG00000019487	2016.66	2450.37	-0.26813	5.3892e-05	0.0014361	Trip10	protein_coding	thyroid hormone receptor interactor 10 [Source:MGI Symbol;Acc:MGI:2146901]
ENSMUSG00000023089	14382.9	16699.4	-0.20967	5.4041e-05	0.0014372	Ndufa5	protein_coding	NADH dehydrogenase (ubiquinone) 1 alpha subcomplex, 5 [Source:MGI Symbol;Acc:MGI:1915452]
ENSMUSG00000021124	1522.99	1751.42	-0.19666	5.474e-05	0.0014529	Vti1b	protein_coding	vesicle transport through interaction with t-SNAREs 1B [Source:MGI Symbol;Acc:MGI:1855688]
ENSMUSG00000008892	5497.59	6206.73	-0.17212	5.49e-05	0.0014543	Vdac3	protein_coding	voltage-dependent anion channel 3 [Source:MGI Symbol;Acc:MGI:106922]
ENSMUSG00000040479	1112.51	889.826	0.30292	5.51e-05	0.0014568	Dgkz	protein_coding	diacylglycerol kinase zeta [Source:MGI Symbol;Acc:MGI:1278339]
ENSMUSG00000024990	46.6482	15.5019	0.63879	5.5984e-05	0.0014772	Rbp4	protein_coding	retinol binding protein 4, plasma [Source:MGI Symbol;Acc:MGI:97879]
ENSMUSG00000055923	212.323	155.539	0.40347	5.6245e-05	0.0014812	Aasdh	protein_coding	aminoadipate-semialdehyde dehydrogenase [Source:MGI Symbol;Acc:MGI:2442517]
ENSMUSG00000020277	2378.49	2775.74	-0.21639	5.6904e-05	0.0014873	Pfkl	protein_coding	phosphofructokinase, liver, B-type [Source:MGI Symbol;Acc:MGI:97547]
ENSMUSG00000029993	1070.89	1252.23	-0.21919	5.6917e-05	0.0014873	Nfu1	protein_coding	NFU1 iron-sulfur cluster scaffold homolog (S. cerevisiae) [Source:MGI Symbol;Acc:MGI:1913290]
ENSMUSG00000001604	1520.2	1873.91	-0.28644	5.6885e-05	0.0014873	Tcea3	protein_coding	transcription elongation factor A (SII), 3 [Source:MGI Symbol;Acc:MGI:1196908]
ENSMUSG00000057193	1143.48	1421.45	-0.29673	5.6612e-05	0.0014873	Slc44a2	protein_coding	solute carrier family 44, member 2 [Source:MGI Symbol;Acc:MGI:1915932]
ENSMUSG00000055254	71.0203	28.9116	0.64762	5.7948e-05	0.0015114	Ntrk2	protein_coding	neurotrophic tyrosine kinase, receptor, type 2 [Source:MGI Symbol;Acc:MGI:97384]
ENSMUSG00000030084	438.274	356.766	0.28205	5.8432e-05	0.001521	Plxna1	protein_coding	plexin A1 [Source:MGI Symbol;Acc:MGI:107685]
ENSMUSG00000041235	315.102	235.583	0.38145	5.9764e-05	0.0015527	Chd7	protein_coding	chromodomain helicase DNA binding protein 7 [Source:MGI Symbol;Acc:MGI:2444748]
ENSMUSG00000024914	4292.47	5192.22	-0.26279	6.0144e-05	0.0015596	Drap1	protein_coding	Dr1 associated protein 1 (negative cofactor 2 alpha) [Source:MGI Symbol;Acc:MGI:1913806]
ENSMUSG00000006542	56.9948	31.9051	0.58987	6.0366e-05	0.0015623	Prkag3	protein_coding	protein kinase, AMP-activated, gamma 3 non-catatlytic subunit [Source:MGI Symbol;Acc:MGI:1891343]
ENSMUSG00000043858	343.922	260.154	0.36811	6.1051e-05	0.0015741	Nup62	protein_coding	nucleoporin 62 [Source:MGI Symbol;Acc:MGI:1351500]
ENSMUSG00000026193	889.016	733.003	0.26676	6.0993e-05	0.0015741	Fn1	protein_coding	fibronectin 1 [Source:MGI Symbol;Acc:MGI:95566]
ENSMUSG00000029201	274.912	208.999	0.36362	6.1734e-05	0.0015866	Ugdh	protein_coding	UDP-glucose dehydrogenase [Source:MGI Symbol;Acc:MGI:1306785]
ENSMUSG00000032511	3360.59	4427.72	-0.36346	6.1774e-05	0.0015866	Scn5a	protein_coding	sodium channel, voltage-gated, type V, alpha [Source:MGI Symbol;Acc:MGI:98251]
ENSMUSG00000026526	7647.96	8647.64	-0.17411	6.191e-05	0.0015871	Fh1	protein_coding	fumarate hydratase 1 [Source:MGI Symbol;Acc:MGI:95530]
ENSMUSG00000029094	309.481	233.875	0.36607	6.2205e-05	0.0015917	Afap1	protein_coding	actin filament associated protein 1 [Source:MGI Symbol;Acc:MGI:1917542]
ENSMUSG00000063450	846.743	678.93	0.30141	6.3843e-05	0.0016305	Syne2	protein_coding	spectrin repeat containing, nuclear envelope 2 [Source:MGI Symbol;Acc:MGI:2449316]
ENSMUSG00000021097	54.4631	30.0057	0.59494	6.4208e-05	0.0016367	Clmn	protein_coding	calmin [Source:MGI Symbol;Acc:MGI:2136957]
ENSMUSG00000028059	713.758	555.65	0.33496	6.4855e-05	0.0016501	Arhgef2	protein_coding	rho/rac guanine nucleotide exchange factor (GEF) 2 [Source:MGI Symbol;Acc:MGI:103264]
ENSMUSG00000022136	1166.55	940.264	0.29467	6.5938e-05	0.0016745	Dnajc3	protein_coding	DnaJ (Hsp40) homolog, subfamily C, member 3 [Source:MGI Symbol;Acc:MGI:107373]
ENSMUSG00000052981	324.092	240.097	0.38729	6.6827e-05	0.0016921	Ube2ql1	protein_coding	ubiquitin-conjugating enzyme E2Q family-like 1 [Source:MGI Symbol;Acc:MGI:1924230]
ENSMUSG00000034165	647.486	814.471	-0.30985	6.6884e-05	0.0016921	Ccnd3	protein_coding	cyclin D3 [Source:MGI Symbol;Acc:MGI:88315]
ENSMUSG00000032294	21437.3	25067.5	-0.21893	6.828e-05	0.0017242	Pkm	protein_coding	pyruvate kinase, muscle [Source:MGI Symbol;Acc:MGI:97591]
ENSMUSG00000023078	71.1525	30.2542	0.64038	6.8724e-05	0.0017322	Cxcl13	protein_coding	chemokine (C-X-C motif) ligand 13 [Source:MGI Symbol;Acc:MGI:1888499]
ENSMUSG00000040681	1008.79	867.044	0.21373	6.8904e-05	0.0017335	Hmgn1	protein_coding	high mobility group nucleosomal binding domain 1 [Source:MGI Symbol;Acc:MGI:96120]
ENSMUSG00000004562	530.923	430.643	0.28575	6.9205e-05	0.0017379	Arhgef40	protein_coding	Rho guanine nucleotide exchange factor (GEF) 40 [Source:MGI Symbol;Acc:MGI:2685515]
ENSMUSG00000031783	962.67	1147.1	-0.24329	7.0456e-05	0.001766	Polr2c	protein_coding	polymerase (RNA) II (DNA directed) polypeptide C [Source:MGI Symbol;Acc:MGI:109299]
ENSMUSG00000058709	957.423	1138	-0.24048	7.1476e-05	0.0017882	Egln2	protein_coding	egl-9 family hypoxia-inducible factor 2 [Source:MGI Symbol;Acc:MGI:1932287]
ENSMUSG00000021495	444.095	280.651	0.52321	7.3078e-05	0.0018249	Fam193b	protein_coding	family with sequence similarity 193, member B [Source:MGI Symbol;Acc:MGI:2385851]
ENSMUSG00000026135	169.535	120.542	0.4304	7.3259e-05	0.0018261	Zfp142	protein_coding	zinc finger protein 142 [Source:MGI Symbol;Acc:MGI:1924514]
ENSMUSG00000016239	18.0406	6.37805	0.63268	7.383e-05	0.0018369	Lonrf3	protein_coding	LON peptidase N-terminal domain and ring finger 3 [Source:MGI Symbol;Acc:MGI:1921615]
ENSMUSG00000022475	779.473	614.982	0.31905	7.4068e-05	0.0018394	Hdac7	protein_coding	histone deacetylase 7 [Source:MGI Symbol;Acc:MGI:1891835]
ENSMUSG00000038762	1453.07	1644.36	-0.17516	7.4529e-05	0.0018475	Abcf1	protein_coding	ATP-binding cassette, sub-family F (GCN20), member 1 [Source:MGI Symbol;Acc:MGI:1351658]
ENSMUSG00000058006	211.47	153.926	0.40835	7.6453e-05	0.0018917	Mdn1	protein_coding	midasin homolog (yeast) [Source:MGI Symbol;Acc:MGI:1926159]
ENSMUSG00000055900	245.192	317.268	-0.34154	7.7638e-05	0.0019175	Tmem69	protein_coding	transmembrane protein 69 [Source:MGI Symbol;Acc:MGI:3045357]
ENSMUSG00000057604	624.338	483.961	0.33862	7.8489e-05	0.001935	Lmcd1	protein_coding	LIM and cysteine-rich domains 1 [Source:MGI Symbol;Acc:MGI:1353635]
ENSMUSG00000037071	5907.13	347.186	0.46581	7.8838e-05	0.0019401	Scd1	protein_coding	stearoyl-Coenzyme A desaturase 1 [Source:MGI Symbol;Acc:MGI:98239]
ENSMUSG00000026939	413.876	508.389	-0.28296	7.9469e-05	0.001952	Tmem141	protein_coding	transmembrane protein 141 [Source:MGI Symbol;Acc:MGI:1098773]
ENSMUSG00000064302	5077.98	3880.4	0.35489	8.0369e-05	0.0019573	Clasp1	protein_coding	CLIP associating protein 1 [Source:MGI Symbol;Acc:MGI:1923957]
ENSMUSG00000079658	1019.75	1186.05	-0.21186	8.0245e-05	0.0019573	Tceb1	protein_coding	transcription elongation factor B (SIII), polypeptide 1 [Source:MGI Symbol;Acc:MGI:1915173]
ENSMUSG00000001100	2040.24	2384.5	-0.21882	8.0487e-05	0.0019573	Poldip2	protein_coding	polymerase (DNA-directed), delta interacting protein 2 [Source:MGI Symbol;Acc:MGI:1915061]
ENSMUSG00000002661	739.951	884.169	-0.2468	8.0173e-05	0.0019573	Alkbh7	protein_coding	alkB, alkylation repair homolog 7 (E. coli) [Source:MGI Symbol;Acc:MGI:1913650]
ENSMUSG00000002767	1528.57	1886.79	-0.28768	8.0317e-05	0.0019573	Mrpl2	protein_coding	mitochondrial ribosomal protein L2 [Source:MGI Symbol;Acc:MGI:1351622]
ENSMUSG00000020766	218.887	289.391	-0.36588	8.0552e-05	0.0019573	Galk1	protein_coding	galactokinase 1 [Source:MGI Symbol;Acc:MGI:95730]
ENSMUSG00000027809	11500	13082.3	-0.18221	8.0846e-05	0.0019609	Etfdh	protein_coding	electron transferring flavoprotein, dehydrogenase [Source:MGI Symbol;Acc:MGI:106100]
ENSMUSG00000026070	35.7802	15.0328	0.63415	8.1985e-05	0.001977	Il18r1	protein_coding	interleukin 18 receptor 1 [Source:MGI Symbol;Acc:MGI:105383]
ENSMUSG00000021990	411.983	321.008	0.33316	8.2095e-05	0.001977	Spata13	protein_coding	spermatogenesis associated 13 [Source:MGI Symbol;Acc:MGI:104838]
ENSMUSG00000027984	10539.7	12200.3	-0.20555	8.1845e-05	0.001977	Hadh	protein_coding	hydroxyacyl-Coenzyme A dehydrogenase [Source:MGI Symbol;Acc:MGI:96009]
ENSMUSG00000037089	539.282	684.218	-0.32065	8.189e-05	0.001977	Slc35b2	protein_coding	solute carrier family 35, member B2 [Source:MGI Symbol;Acc:MGI:1921086]
ENSMUSG00000062070	5777.01	6736.59	-0.21514	8.3203e-05	0.0020001	Pgk1	protein_coding	phosphoglycerate kinase 1 [Source:MGI Symbol;Acc:MGI:97555]
ENSMUSG00000024299	388.441	236.131	0.54401	8.5376e-05	0.0020487	Adamts10	protein_coding	a disintegrin-like and metallopeptidase (reprolysin type) with thrombospondin type 1 motif, 10 [Source:MGI Symbol;Acc:MGI:2449112]
ENSMUSG00000028385	161.816	116.667	0.41624	8.5651e-05	0.0020517	Snx30	protein_coding	sorting nexin family member 30 [Source:MGI Symbol;Acc:MGI:2443882]
ENSMUSG00000055553	1045.53	1249.64	-0.24757	8.5873e-05	0.0020534	Kxd1	protein_coding	KxDL motif containing 1 [Source:MGI Symbol;Acc:MGI:1922870]
ENSMUSG00000071793	150.632	93.5997	0.53094	8.6687e-05	0.0020692	2610005L07Rik	pseudogene	RIKEN cDNA 2610005L07 gene [Source:MGI Symbol;Acc:MGI:1914283]
ENSMUSG00000031059	8566.7	9980.2	-0.21392	8.7157e-05	0.0020767	Ndufb11	protein_coding	NADH dehydrogenase (ubiquinone) 1 beta subcomplex, 11 [Source:MGI Symbol;Acc:MGI:1349919]
ENSMUSG00000037916	13967.9	16012.2	-0.19244	8.7808e-05	0.0020885	Ndufv1	protein_coding	NADH dehydrogenase (ubiquinone) flavoprotein 1 [Source:MGI Symbol;Acc:MGI:107851]
ENSMUSG00000008384	123.357	184.37	-0.48055	8.823e-05	0.0020949	Sertad1	protein_coding	SERTA domain containing 1 [Source:MGI Symbol;Acc:MGI:1913438]
ENSMUSG00000029019	6147.33	2636.29	0.63084	8.8618e-05	0.0021004	Nppb	protein_coding	natriuretic peptide type B [Source:MGI Symbol;Acc:MGI:97368]
ENSMUSG00000026914	577.563	696.959	-0.25882	8.8857e-05	0.0021024	Psmd14	protein_coding	proteasome (prosome, macropain) 26S subunit, non-ATPase, 14 [Source:MGI Symbol;Acc:MGI:1913284]
ENSMUSG00000019795	1924.44	2213.67	-0.19678	8.919e-05	0.0021066	Pcmt1	protein_coding	protein-L-isoaspartate (D-aspartate) O-methyltransferase 1 [Source:MGI Symbol;Acc:MGI:97502]
ENSMUSG00000037373	2855.28	3345.92	-0.22186	8.9347e-05	0.0021066	Ctbp1	protein_coding	C-terminal binding protein 1 [Source:MGI Symbol;Acc:MGI:1201685]
ENSMUSG00000064202	213.51	280.44	-0.35826	9.3651e-05	0.0022042	4430402I18Rik	protein_coding	RIKEN cDNA 4430402I18 gene [Source:MGI Symbol;Acc:MGI:1918036]
ENSMUSG00000062627	168.737	118.543	0.43992	9.4539e-05	0.0022212	Mysm1	protein_coding	myb-like, SWIRM and MPN domains 1 [Source:MGI Symbol;Acc:MGI:2444584]
ENSMUSG00000029545	3039.16	3711.22	-0.27406	9.4896e-05	0.0022258	Acads	protein_coding	acyl-Coenzyme A dehydrogenase, short chain [Source:MGI Symbol;Acc:MGI:87868]
ENSMUSG00000047547	1324.64	1555.97	-0.22435	9.5251e-05	0.0022302	Cltb	protein_coding	clathrin, light polypeptide (Lcb) [Source:MGI Symbol;Acc:MGI:1921575]
ENSMUSG00000040136	714.76	837.348	-0.22144	9.5447e-05	0.0022309	Abcc8	protein_coding	ATP-binding cassette, sub-family C (CFTR/MRP), member 8 [Source:MGI Symbol;Acc:MGI:1352629]
ENSMUSG00000063576	1394.56	1702.92	-0.27387	9.5815e-05	0.0022357	Klhdc3	protein_coding	kelch domain containing 3 [Source:MGI Symbol;Acc:MGI:2651568]
ENSMUSG00000006057	23990.7	29221.2	-0.27065	9.7677e-05	0.0022752	Atp5g1	protein_coding	ATP synthase, H+ transporting, mitochondrial F0 complex, subunit C1 (subunit 9) [Source:MGI Symbol;Acc:MGI:107653]
ENSMUSG00000004897	1838.12	2158.35	-0.2237	9.8894e-05	0.0022996	Hdgf	protein_coding	hepatoma-derived growth factor [Source:MGI Symbol;Acc:MGI:1194494]
ENSMUSG00000028973	1397.72	1629.45	-0.21518	0.00010224	0.0023734	Abcb8	protein_coding	ATP-binding cassette, sub-family B (MDR/TAP), member 8 [Source:MGI Symbol;Acc:MGI:1351667]
ENSMUSG00000049858	341.534	426.266	-0.30007	0.00010469	0.002426	Suox	protein_coding	sulfite oxidase [Source:MGI Symbol;Acc:MGI:2446117]
ENSMUSG00000020514	362.23	443.896	-0.27917	0.00010553	0.0024412	Mrpl22	protein_coding	mitochondrial ribosomal protein L22 [Source:MGI Symbol;Acc:MGI:1333794]
ENSMUSG00000018893	164600	197887	-0.25421	0.00010599	0.0024477	Mb	protein_coding	myoglobin [Source:MGI Symbol;Acc:MGI:96922]
ENSMUSG00000024011	804.642	635.103	0.31907	0.00010625	0.002448	Pi16	protein_coding	peptidase inhibitor 16 [Source:MGI Symbol;Acc:MGI:1921366]
ENSMUSG00000031958	957.53	1163.09	-0.2677	0.00010655	0.002448	Ldhd	protein_coding	lactate dehydrogenase D [Source:MGI Symbol;Acc:MGI:106428]
ENSMUSG00000061535	97.0355	136.273	-0.42466	0.00010646	0.002448	C1qtnf7	protein_coding	C1q and tumor necrosis factor related protein 7 [Source:MGI Symbol;Acc:MGI:1925911]
ENSMUSG00000060376	6288.45	7756.66	-0.28598	0.00010695	0.0024531	Bckdha	protein_coding	branched chain ketoacid dehydrogenase E1, alpha polypeptide [Source:MGI Symbol;Acc:MGI:107701]
ENSMUSG00000003847	715.908	567.272	0.31425	0.00010948	0.0025026	Nfat5	protein_coding	nuclear factor of activated T cells 5 [Source:MGI Symbol;Acc:MGI:1859333]
ENSMUSG00000045160	2098.88	2567.7	-0.27611	0.00010946	0.0025026	Bola3	protein_coding	bolA-like 3 (E. coli) [Source:MGI Symbol;Acc:MGI:1925903]
ENSMUSG00000061313	277.928	204.547	0.39172	0.00011074	0.0025271	Ddhd2	protein_coding	DDHD domain containing 2 [Source:MGI Symbol;Acc:MGI:1919358]
ENSMUSG00000020708	1940.18	2262.99	-0.21511	0.00011116	0.0025326	Psmc5	protein_coding	protease (prosome, macropain) 26S subunit, ATPase 5 [Source:MGI Symbol;Acc:MGI:105047]
ENSMUSG00000038766	337.67	266.048	0.32235	0.00011137	0.002533	Gabpb2	protein_coding	GA repeat binding protein, beta 2 [Source:MGI Symbol;Acc:MGI:95612]
ENSMUSG00000070803	566.229	353.426	0.52327	0.00011171	0.0025364	Cited4	protein_coding	Cbp/p300-interacting transactivator, with Glu/Asp-rich carboxy-terminal domain, 4 [Source:MGI Symbol;Acc:MGI:1861694]
ENSMUSG00000005354	3213.57	3868.55	-0.25592	0.00011237	0.0025472	Txn2	protein_coding	thioredoxin 2 [Source:MGI Symbol;Acc:MGI:1929468]
ENSMUSG00000019437	119.805	82.5843	0.45019	0.0001133	0.0025546	Tlcd1	protein_coding	TLC domain containing 1 [Source:MGI Symbol;Acc:MGI:1915572]
ENSMUSG00000021993	1669.2	1900.44	-0.18379	0.00011303	0.0025546	Mipep	protein_coding	mitochondrial intermediate peptidase [Source:MGI Symbol;Acc:MGI:1917728]
ENSMUSG00000052738	5864.22	6713.67	-0.19056	0.00011328	0.0025546	Suclg1	protein_coding	succinate-CoA ligase, GDP-forming, alpha subunit [Source:MGI Symbol;Acc:MGI:1927234]
ENSMUSG00000039195	228.713	304.527	-0.37277	0.00011345	0.0025546	1110008P14Rik	protein_coding	RIKEN cDNA 1110008P14 gene [Source:MGI Symbol;Acc:MGI:1920987]
ENSMUSG00000022179	90.079	55.9436	0.52283	0.00011435	0.0025706	4931414P19Rik	protein_coding	RIKEN cDNA 4931414P19 gene [Source:MGI Symbol;Acc:MGI:1921609]
ENSMUSG00000015476	52.6422	30.4507	0.56041	0.00011694	0.0026243	Prrt1	protein_coding	proline-rich transmembrane protein 1 [Source:MGI Symbol;Acc:MGI:1932118]
ENSMUSG00000055866	187.519	535.819	-0.61057	0.00011713	0.0026243	Per2	protein_coding	period circadian clock 2 [Source:MGI Symbol;Acc:MGI:1195265]
ENSMUSG00000047146	78.3719	49.7003	0.51034	0.00011966	0.0026764	Tet1	protein_coding	tet methylcytosine dioxygenase 1 [Source:MGI Symbol;Acc:MGI:1098693]
ENSMUSG00000037921	66.0337	35.5101	0.58607	0.00012014	0.0026797	Ddx60	protein_coding	DEAD (Asp-Glu-Ala-Asp) box polypeptide 60 [Source:MGI Symbol;Acc:MGI:2384570]
ENSMUSG00000055436	791.364	619.278	0.32892	0.0001202	0.0026797	Srsf11	protein_coding	serine/arginine-rich splicing factor 11 [Source:MGI Symbol;Acc:MGI:1916457]
ENSMUSG00000027583	247.814	185.134	0.37892	0.00012062	0.002682	Zbtb46	protein_coding	zinc finger and BTB domain containing 46 [Source:MGI Symbol;Acc:MGI:1919397]
ENSMUSG00000019505	7663.54	9423.83	-0.28204	0.0001207	0.002682	Ubb	protein_coding	ubiquitin B [Source:MGI Symbol;Acc:MGI:98888]
ENSMUSG00000040998	85.4818	52.6186	0.53149	0.00012156	0.0026883	Npnt	protein_coding	nephronectin [Source:MGI Symbol;Acc:MGI:2148811]
ENSMUSG00000024991	3068.92	2554.33	0.25352	0.00012158	0.0026883	Eif3a	protein_coding	eukaryotic translation initiation factor 3, subunit A [Source:MGI Symbol;Acc:MGI:95301]
ENSMUSG00000071014	1618.62	2015.38	-0.29728	0.00012129	0.0026883	Ndufb6	protein_coding	NADH dehydrogenase (ubiquinone) 1 beta subcomplex, 6 [Source:MGI Symbol;Acc:MGI:2684983]
ENSMUSG00000027282	1753.31	2005	-0.18909	0.00012216	0.0026968	Mtch2	protein_coding	mitochondrial carrier homolog 2 (C. elegans) [Source:MGI Symbol;Acc:MGI:1929260]
ENSMUSG00000039275	570.305	463.321	0.28481	0.00012366	0.0027253	Foxk2	protein_coding	forkhead box K2 [Source:MGI Symbol;Acc:MGI:1916087]
ENSMUSG00000037362	198.519	134.168	0.46801	0.00012578	0.0027676	Nov	protein_coding	nephroblastoma overexpressed gene [Source:MGI Symbol;Acc:MGI:109185]
ENSMUSG00000032315	4.12487	16.3543	-0.57338	0.00012607	0.0027694	Cyp1a1	protein_coding	cytochrome P450, family 1, subfamily a, polypeptide 1 [Source:MGI Symbol;Acc:MGI:88588]
ENSMUSG00000082286	165.992	98.187	0.55126	0.00012705	0.0027851	Pisd-ps1	pseudogene	phosphatidylserine decarboxylase, pseudogene 1 [Source:MGI Symbol;Acc:MGI:3842428]
ENSMUSG00000026202	8404.62	10648.7	-0.31723	0.00012719	0.0027851	Tuba4a	protein_coding	tubulin, alpha 4A [Source:MGI Symbol;Acc:MGI:1095410]
ENSMUSG00000027677	332.114	218.529	0.48786	0.00012835	0.0027945	Ttc14	protein_coding	tetratricopeptide repeat domain 14 [Source:MGI Symbol;Acc:MGI:1914370]
ENSMUSG00000071866	3485.37	4078.95	-0.21954	0.00012832	0.0027945	Ppia	protein_coding	peptidylprolyl isomerase A [Source:MGI Symbol;Acc:MGI:97749]
ENSMUSG00000052429	982.78	1175.29	-0.2481	0.00012845	0.0027945	Prmt1	protein_coding	protein arginine N-methyltransferase 1 [Source:MGI Symbol;Acc:MGI:107846]
ENSMUSG00000028461	273.37	342.725	-0.30484	0.00012811	0.0027945	Ccdc107	protein_coding	coiled-coil domain containing 107 [Source:MGI Symbol;Acc:MGI:1913423]
ENSMUSG00000014444	405.44	325.396	0.29851	0.00012944	0.0028114	Piezo1	protein_coding	piezo-type mechanosensitive ion channel component 1 [Source:MGI Symbol;Acc:MGI:3603204]
ENSMUSG00000027318	65.0892	35.5318	0.58284	0.00013019	0.0028173	Adam33	protein_coding	a disintegrin and metallopeptidase domain 33 [Source:MGI Symbol;Acc:MGI:1341813]
ENSMUSG00000078812	5306.78	6274.38	-0.23279	0.00013033	0.0028173	Eif5a	protein_coding	eukaryotic translation initiation factor 5A [Source:MGI Symbol;Acc:MGI:106248]
ENSMUSG00000049115	612.837	800.523	-0.3525	0.00013007	0.0028173	Agtr1a	protein_coding	angiotensin II receptor, type 1a [Source:MGI Symbol;Acc:MGI:87964]
ENSMUSG00000031505	627.303	745.167	-0.23964	0.00013217	0.0028525	Carkd	protein_coding	carbohydrate kinase domain containing [Source:MGI Symbol;Acc:MGI:1913353]
ENSMUSG00000027165	904.52	1058.22	-0.21779	0.00013386	0.0028797	B230118H07Rik	protein_coding	RIKEN cDNA B230118H07 gene [Source:MGI Symbol;Acc:MGI:1915420]
ENSMUSG00000007029	552.196	656.999	-0.24043	0.00013384	0.0028797	Vars	protein_coding	valyl-tRNA synthetase [Source:MGI Symbol;Acc:MGI:90675]
ENSMUSG00000022255	862.124	678.358	0.31966	0.00013517	0.0029033	Mtdh	protein_coding	metadherin [Source:MGI Symbol;Acc:MGI:1914404]
ENSMUSG00000026463	479.707	385.302	0.29706	0.00013706	0.0029392	Atp2b4	protein_coding	ATPase, Ca++ transporting, plasma membrane 4 [Source:MGI Symbol;Acc:MGI:88111]
ENSMUSG00000029655	405.167	316.506	0.32985	0.00013777	0.0029498	N4bp2l2	protein_coding	NEDD4 binding protein 2-like 2 [Source:MGI Symbol;Acc:MGI:2687207]
ENSMUSG00000032724	736.836	577.92	0.32335	0.0001394	0.00298	Abtb2	protein_coding	ankyrin repeat and BTB (POZ) domain containing 2 [Source:MGI Symbol;Acc:MGI:2139365]
ENSMUSG00000022504	46.7359	17.5072	0.60882	0.00014046	0.0029842	Ciita	protein_coding	class II transactivator [Source:MGI Symbol;Acc:MGI:108445]
ENSMUSG00000026626	2455.64	2029.9	0.26128	0.0001403	0.0029842	Ppp2r5a	protein_coding	protein phosphatase 2, regulatory subunit B', alpha [Source:MGI Symbol;Acc:MGI:2388479]
ENSMUSG00000028672	1049.73	1241.04	-0.23357	0.00014049	0.0029842	Hmgcl	protein_coding	3-hydroxy-3-methylglutaryl-Coenzyme A lyase [Source:MGI Symbol;Acc:MGI:96158]
ENSMUSG00000004610	12330.2	15160.3	-0.28151	0.00014002	0.0029842	Etfb	protein_coding	electron transferring flavoprotein, beta polypeptide [Source:MGI Symbol;Acc:MGI:106098]
ENSMUSG00000063179	390.659	489.034	-0.30472	0.00014086	0.0029874	Pstk	protein_coding	phosphoseryl-tRNA kinase [Source:MGI Symbol;Acc:MGI:2685945]
ENSMUSG00000026568	4453.44	5286.65	-0.23787	0.00014195	0.0030059	Mpc2	protein_coding	mitochondrial pyruvate carrier 2 [Source:MGI Symbol;Acc:MGI:1917706]
ENSMUSG00000061518	11924.8	14543.3	-0.27157	0.00014321	0.0030279	Cox5b	protein_coding	cytochrome c oxidase subunit Vb [Source:MGI Symbol;Acc:MGI:88475]
ENSMUSG00000033943	601.732	472.584	0.3246	0.00014486	0.0030578	Mga	protein_coding	MAX gene associated [Source:MGI Symbol;Acc:MGI:1352483]
ENSMUSG00000074661	268.632	342.424	-0.32289	0.00014559	0.0030685	Pde4d	protein_coding	-
ENSMUSG00000032449	828.041	632.136	0.35404	0.00014853	0.0031255	Slc25a36	protein_coding	solute carrier family 25, member 36 [Source:MGI Symbol;Acc:MGI:1924909]
ENSMUSG00000062115	575.457	471.451	0.2709	0.00014889	0.0031283	Rai1	protein_coding	retinoic acid induced 1 [Source:MGI Symbol;Acc:MGI:103291]
ENSMUSG00000034751	536.192	429.006	0.30174	0.00015056	0.0031584	Mast4	protein_coding	microtubule associated serine/threonine kinase family member 4 [Source:MGI Symbol;Acc:MGI:1918885]
ENSMUSG00000031373	48.6109	14.3236	0.57847	0.00015257	0.0031958	Car5b	protein_coding	carbonic anhydrase 5b, mitochondrial [Source:MGI Symbol;Acc:MGI:1926249]
ENSMUSG00000034570	398.161	306.751	0.34517	0.00015427	0.0032263	Inpp5j	protein_coding	inositol polyphosphate 5-phosphatase J [Source:MGI Symbol;Acc:MGI:2158663]
ENSMUSG00000052337	7776.03	8720.62	-0.16254	0.00015567	0.0032506	Immt	protein_coding	inner membrane protein, mitochondrial [Source:MGI Symbol;Acc:MGI:1923864]
ENSMUSG00000001150	404.437	320.603	0.31331	0.00015682	0.0032544	Mcm3ap	protein_coding	minichromosome maintenance deficient 3 (S. cerevisiae) associated protein [Source:MGI Symbol;Acc:MGI:1930089]
ENSMUSG00000030352	1116.73	946.989	0.22944	0.0001568	0.0032544	Tspan9	protein_coding	tetraspanin 9 [Source:MGI Symbol;Acc:MGI:1924558]
ENSMUSG00000020717	2832.61	2478.24	0.18795	0.00015625	0.0032544	Pecam1	protein_coding	platelet/endothelial cell adhesion molecule 1 [Source:MGI Symbol;Acc:MGI:97537]
ENSMUSG00000005510	7011.92	8089.91	-0.20059	0.00015672	0.0032544	Ndufs3	protein_coding	NADH dehydrogenase (ubiquinone) Fe-S protein 3 [Source:MGI Symbol;Acc:MGI:1915599]
ENSMUSG00000020738	1895.23	2166.19	-0.18804	0.00015853	0.0032849	Sumo2	protein_coding	SMT3 suppressor of mif two 3 homolog 2 (yeast) [Source:MGI Symbol;Acc:MGI:2158813]
ENSMUSG00000024953	7997.84	9576.82	-0.24862	0.00015885	0.0032866	Prdx5	protein_coding	peroxiredoxin 5 [Source:MGI Symbol;Acc:MGI:1859821]
ENSMUSG00000048279	660.038	518.547	0.32177	0.00016153	0.0033368	Sacs	protein_coding	sacsin [Source:MGI Symbol;Acc:MGI:1354724]
ENSMUSG00000025825	2424.16	2869.76	-0.23419	0.00016375	0.0033774	Iscu	protein_coding	IscU iron-sulfur cluster scaffold homolog (E. coli) [Source:MGI Symbol;Acc:MGI:1913633]
ENSMUSG00000000120	40.4195	18.419	0.60538	0.00016481	0.0033891	Ngfr	protein_coding	nerve growth factor receptor (TNFR superfamily, member 16) [Source:MGI Symbol;Acc:MGI:97323]
ENSMUSG00000022193	1816.48	2168.2	-0.24475	0.00016464	0.0033891	Psmb5	protein_coding	proteasome (prosome, macropain) subunit, beta type 5 [Source:MGI Symbol;Acc:MGI:1194513]
ENSMUSG00000025968	9632.27	10941.5	-0.17986	0.00016654	0.0034165	Ndufs1	protein_coding	NADH dehydrogenase (ubiquinone) Fe-S protein 1 [Source:MGI Symbol;Acc:MGI:2443241]
ENSMUSG00000021606	7895.86	9464.18	-0.2498	0.00016665	0.0034165	Ndufs6	protein_coding	NADH dehydrogenase (ubiquinone) Fe-S protein 6 [Source:MGI Symbol;Acc:MGI:107932]
ENSMUSG00000028756	14882	17602.5	-0.23298	0.00016712	0.0034209	Pink1	protein_coding	PTEN induced putative kinase 1 [Source:MGI Symbol;Acc:MGI:1916193]
ENSMUSG00000020900	638.489	497.969	0.33039	0.00016977	0.00347	Myh10	protein_coding	myosin, heavy polypeptide 10, non-muscle [Source:MGI Symbol;Acc:MGI:1930780]
ENSMUSG00000021994	230.647	167.442	0.40202	0.00017077	0.0034719	Wnt5a	protein_coding	wingless-type MMTV integration site family, member 5A [Source:MGI Symbol;Acc:MGI:98958]
ENSMUSG00000041168	3031.16	3416.09	-0.16942	0.00017128	0.0034719	Lonp1	protein_coding	lon peptidase 1, mitochondrial [Source:MGI Symbol;Acc:MGI:1921392]
ENSMUSG00000068921	1587.95	1817.34	-0.18946	0.00017113	0.0034719	Dap3	protein_coding	death associated protein 3 [Source:MGI Symbol;Acc:MGI:1929538]
ENSMUSG00000032306	1535.22	1775.34	-0.20401	0.00017128	0.0034719	Mpi	protein_coding	mannose phosphate isomerase [Source:MGI Symbol;Acc:MGI:97075]
ENSMUSG00000069744	1208.55	1478.97	-0.27552	0.00017141	0.0034719	Psmb3	protein_coding	proteasome (prosome, macropain) subunit, beta type 3 [Source:MGI Symbol;Acc:MGI:1347014]
ENSMUSG00000041762	227.299	289.8	-0.3245	0.00017091	0.0034719	Gpr155	protein_coding	G protein-coupled receptor 155 [Source:MGI Symbol;Acc:MGI:1915776]
ENSMUSG00000028684	848.274	1011.35	-0.24286	0.00017179	0.0034744	Urod	protein_coding	uroporphyrinogen decarboxylase [Source:MGI Symbol;Acc:MGI:98916]
ENSMUSG00000051154	812.666	980.404	-0.25753	0.00017237	0.003481	Commd3	protein_coding	COMM domain containing 3 [Source:MGI Symbol;Acc:MGI:88218]
ENSMUSG00000048612	179.012	133.069	0.38128	0.00017357	0.0034902	Myof	protein_coding	myoferlin [Source:MGI Symbol;Acc:MGI:1919192]
ENSMUSG00000083012	1534.3	1165.67	0.35785	0.00017341	0.0034902	Fam220a	protein_coding	family with sequence similarity 220, member A [Source:MGI Symbol;Acc:MGI:1914488]
ENSMUSG00000022507	745.912	881.114	-0.2312	0.00017361	0.0034902	1810013L24Rik	protein_coding	RIKEN cDNA 1810013L24 gene [Source:MGI Symbol;Acc:MGI:1916303]
ENSMUSG00000043243	24.2696	10.2319	0.6041	0.00017537	0.0035117	Fam129c	protein_coding	family with sequence similarity 129, member C [Source:MGI Symbol;Acc:MGI:3686743]
ENSMUSG00000022370	1152.4	1374.22	-0.24301	0.00017545	0.0035117	Mrpl13	protein_coding	mitochondrial ribosomal protein L13 [Source:MGI Symbol;Acc:MGI:2137218]
ENSMUSG00000053716	862.444	1090.37	-0.31337	0.00017504	0.0035117	Dusp7	protein_coding	dual specificity phosphatase 7 [Source:MGI Symbol;Acc:MGI:2387100]
ENSMUSG00000038811	128.764	83.0943	0.49714	0.00017653	0.0035227	Gngt2	protein_coding	guanine nucleotide binding protein (G protein), gamma transducing activity polypeptide 2 [Source:MGI Symbol;Acc:MGI:893584]
ENSMUSG00000030516	1261.72	1073.18	0.22546	0.00017645	0.0035227	Tjp1	protein_coding	tight junction protein 1 [Source:MGI Symbol;Acc:MGI:98759]
ENSMUSG00000004044	4843.28	4140.76	0.21831	0.00017848	0.0035564	Ptrf	protein_coding	polymerase I and transcript release factor [Source:MGI Symbol;Acc:MGI:1277968]
ENSMUSG00000024958	369.732	475.886	-0.33518	0.00017959	0.0035732	Gpr137	protein_coding	G protein-coupled receptor 137 [Source:MGI Symbol;Acc:MGI:2147529]
ENSMUSG00000053477	1524.11	1234.14	0.28566	0.00018179	0.0036118	Tcf4	protein_coding	transcription factor 4 [Source:MGI Symbol;Acc:MGI:98506]
ENSMUSG00000072949	652.182	445.279	0.45487	0.00018223	0.0036152	Acot1	protein_coding	acyl-CoA thioesterase 1 [Source:MGI Symbol;Acc:MGI:1349396]
ENSMUSG00000010914	1833.62	2157.1	-0.22595	0.00018252	0.0036156	Pdhx	protein_coding	pyruvate dehydrogenase complex, component X [Source:MGI Symbol;Acc:MGI:1351627]
ENSMUSG00000022553	1666.4	1954.18	-0.22245	0.00018318	0.0036233	Maf1	protein_coding	MAF1 homolog (S. cerevisiae) [Source:MGI Symbol;Acc:MGI:1916127]
ENSMUSG00000068036	1297.46	937.401	0.40701	0.00018398	0.0036285	Mllt4	protein_coding	myeloid/lymphoid or mixed-lineage leukemia (trithorax homolog, Drosophila); translocated to, 4 [Source:MGI Symbol;Acc:MGI:1314653]
ENSMUSG00000028452	4906.62	5565.51	-0.17758	0.00018395	0.0036285	Vcp	protein_coding	valosin containing protein [Source:MGI Symbol;Acc:MGI:99919]
ENSMUSG00000032047	12410.3	13997	-0.17015	0.00018483	0.00364	Acat1	protein_coding	acetyl-Coenzyme A acetyltransferase 1 [Source:MGI Symbol;Acc:MGI:87870]
ENSMUSG00000039007	665.338	792.027	-0.24229	0.00018519	0.0036417	Cpq	protein_coding	carboxypeptidase Q [Source:MGI Symbol;Acc:MGI:1889205]
ENSMUSG00000025465	5854.93	6715.2	-0.19282	0.00018653	0.0036627	Echs1	protein_coding	enoyl Coenzyme A hydratase, short chain, 1, mitochondrial [Source:MGI Symbol;Acc:MGI:2136460]
ENSMUSG00000042599	454.2	347.734	0.34986	0.00018809	0.0036881	Kdm7a	protein_coding	lysine (K)-specific demethylase 7A [Source:MGI Symbol;Acc:MGI:2443388]
ENSMUSG00000035954	193.212	142.081	0.38965	0.00018941	0.0037045	Dock4	protein_coding	dedicator of cytokinesis 4 [Source:MGI Symbol;Acc:MGI:1918006]
ENSMUSG00000049659	390.448	321.721	0.26763	0.00018948	0.0037045	Aftph	protein_coding	aftiphilin [Source:MGI Symbol;Acc:MGI:1923012]
ENSMUSG00000003423	466.105	572.228	-0.27894	0.00019142	0.0037372	Pih1d1	protein_coding	PIH1 domain containing 1 [Source:MGI Symbol;Acc:MGI:1916095]
ENSMUSG00000036309	2542.15	2938.99	-0.20325	0.00019227	0.0037482	Skp1a	protein_coding	S-phase kinase-associated protein 1A [Source:MGI Symbol;Acc:MGI:103575]
ENSMUSG00000024026	1808.9	2039.82	-0.17056	0.00019256	0.0037485	Glo1	protein_coding	glyoxalase 1 [Source:MGI Symbol;Acc:MGI:95742]
ENSMUSG00000026411	278.894	369.625	-0.36644	0.00019333	0.003758	Tmem9	protein_coding	transmembrane protein 9 [Source:MGI Symbol;Acc:MGI:1913491]
ENSMUSG00000002625	570.197	456.67	0.30111	0.00019384	0.0037625	Akap8l	protein_coding	A kinase (PRKA) anchor protein 8-like [Source:MGI Symbol;Acc:MGI:1860606]
ENSMUSG00000007721	837.455	1022.99	-0.27266	0.00019479	0.0037756	Ccdc124	protein_coding	coiled-coil domain containing 124 [Source:MGI Symbol;Acc:MGI:1916403]
ENSMUSG00000037204	336.347	411.179	-0.27344	0.00019576	0.003789	Atg101	protein_coding	autophagy related 101 [Source:MGI Symbol;Acc:MGI:1915368]
ENSMUSG00000039640	707.432	892.806	-0.31217	0.00019884	0.0038432	Mrpl12	protein_coding	mitochondrial ribosomal protein L12 [Source:MGI Symbol;Acc:MGI:1926273]
ENSMUSG00000028248	696.848	479.695	0.44899	0.0001998	0.0038561	Pnisr	protein_coding	PNN interacting serine/arginine-rich [Source:MGI Symbol;Acc:MGI:1913875]
ENSMUSG00000010608	882.817	707.635	0.29895	0.00020414	0.0039343	Rbm25	protein_coding	RNA binding motif protein 25 [Source:MGI Symbol;Acc:MGI:1914289]
ENSMUSG00000034783	47.465	25.092	0.57893	0.0002047	0.0039394	Cd207	protein_coding	CD207 antigen [Source:MGI Symbol;Acc:MGI:2180021]
ENSMUSG00000026399	163.354	121.427	0.37825	0.00020553	0.0039486	Cd55	protein_coding	CD55 antigen [Source:MGI Symbol;Acc:MGI:104850]
ENSMUSG00000022505	825.858	1015.24	-0.28148	0.00020576	0.0039486	Emp2	protein_coding	epithelial membrane protein 2 [Source:MGI Symbol;Acc:MGI:1098726]
ENSMUSG00000086859	165.359	109.327	0.48038	0.00020629	0.0039533	2810008D09Rik	lincRNA	RIKEN cDNA 2810008D09 gene [Source:MGI Symbol;Acc:MGI:1924222]
ENSMUSG00000034647	226.526	306.065	-0.38375	0.00020719	0.0039648	Ankrd12	protein_coding	ankyrin repeat domain 12 [Source:MGI Symbol;Acc:MGI:1914357]
ENSMUSG00000001750	198.631	127.097	0.5005	0.00020792	0.0039731	Tcirg1	protein_coding	T cell, immune regulator 1, ATPase, H+ transporting, lysosomal V0 protein A3 [Source:MGI Symbol;Acc:MGI:1350931]
ENSMUSG00000031967	1234.82	1425.4	-0.20173	0.00020942	0.0039961	Afg3l1	protein_coding	AFG3-like AAA ATPase 1 [Source:MGI Symbol;Acc:MGI:1928277]
ENSMUSG00000041035	244.093	307.091	-0.30812	0.00021138	0.0040239	Dpcd	protein_coding	deleted in primary ciliary dyskinesia [Source:MGI Symbol;Acc:MGI:1924407]
ENSMUSG00000075408	51.39	85.442	-0.53075	0.00021147	0.0040239	6030408B16Rik	lincRNA	RIKEN cDNA 6030408B16 gene [Source:MGI Symbol;Acc:MGI:1924967]
ENSMUSG00000031906	75.8471	47.3832	0.51592	0.00021208	0.0040242	Smpd3	protein_coding	sphingomyelin phosphodiesterase 3, neutral [Source:MGI Symbol;Acc:MGI:1927578]
ENSMUSG00000024617	971.208	1166.48	-0.25215	0.00021195	0.0040242	Camk2a	protein_coding	calcium/calmodulin-dependent protein kinase II alpha [Source:MGI Symbol;Acc:MGI:88256]
ENSMUSG00000034205	195.582	142.342	0.39738	0.00021269	0.0040245	Loxl2	protein_coding	lysyl oxidase-like 2 [Source:MGI Symbol;Acc:MGI:2137913]
ENSMUSG00000020015	352.793	277.45	0.32259	0.00021242	0.0040245	Cdk17	protein_coding	cyclin-dependent kinase 17 [Source:MGI Symbol;Acc:MGI:97517]
ENSMUSG00000029017	2402.53	2731.65	-0.18096	0.00021353	0.0040308	Pmpcb	protein_coding	peptidase (mitochondrial processing) beta [Source:MGI Symbol;Acc:MGI:1920328]
ENSMUSG00000033938	4594.29	5577.49	-0.26516	0.00021362	0.0040308	Ndufb7	protein_coding	NADH dehydrogenase (ubiquinone) 1 beta subcomplex, 7 [Source:MGI Symbol;Acc:MGI:1914166]
ENSMUSG00000057933	26.3707	9.63884	0.58758	0.00021575	0.0040652	Gsta2	protein_coding	glutathione S-transferase, alpha 2 (Yc2) [Source:MGI Symbol;Acc:MGI:95863]
ENSMUSG00000040669	193.532	251.719	-0.34237	0.00021615	0.0040671	Phc1	protein_coding	polyhomeotic-like 1 (Drosophila) [Source:MGI Symbol;Acc:MGI:103248]
ENSMUSG00000028639	15923.8	17698.6	-0.15003	0.00021797	0.0040957	Ybx1	protein_coding	Y box protein 1 [Source:MGI Symbol;Acc:MGI:99146]
ENSMUSG00000070544	896.297	733.775	0.27417	0.00021993	0.0041268	Top1	protein_coding	topoisomerase (DNA) I [Source:MGI Symbol;Acc:MGI:98788]
ENSMUSG00000039050	792.604	945.228	-0.24342	0.00022441	0.004205	Osbpl2	protein_coding	oxysterol binding protein-like 2 [Source:MGI Symbol;Acc:MGI:2442832]
ENSMUSG00000027384	280.884	351.912	-0.30426	0.0002254	0.0042119	Ndufaf5	protein_coding	NADH dehydrogenase (ubiquinone) complex I, assembly factor 5 [Source:MGI Symbol;Acc:MGI:1916737]
ENSMUSG00000062210	882.325	1113.62	-0.31204	0.00022516	0.0042119	Tnfaip8	protein_coding	tumor necrosis factor, alpha-induced protein 8 [Source:MGI Symbol;Acc:MGI:2147191]
ENSMUSG00000055675	86.6441	53.5995	0.51972	0.00022611	0.0042193	Kbtbd11	protein_coding	kelch repeat and BTB (POZ) domain containing 11 [Source:MGI Symbol;Acc:MGI:1922151]
ENSMUSG00000017188	1057.41	1241.82	-0.22375	0.00022784	0.0042456	Coa3	protein_coding	cytochrome C oxidase assembly factor 3 [Source:MGI Symbol;Acc:MGI:1098757]
ENSMUSG00000001348	48.0432	14.681	0.56276	0.00022901	0.0042559	Acp5	protein_coding	acid phosphatase 5, tartrate resistant [Source:MGI Symbol;Acc:MGI:87883]
ENSMUSG00000022428	308.909	403.511	-0.34939	0.00022902	0.0042559	Cby1	protein_coding	chibby homolog 1 (Drosophila) [Source:MGI Symbol;Acc:MGI:1920989]
ENSMUSG00000020284	226.016	284.252	-0.30843	0.00023038	0.0042753	1810043G02Rik	protein_coding	RIKEN cDNA 1810043G02 gene [Source:MGI Symbol;Acc:MGI:1915134]
ENSMUSG00000062960	3195.06	2298.68	0.40918	0.0002314	0.0042865	Kdr	protein_coding	kinase insert domain protein receptor [Source:MGI Symbol;Acc:MGI:96683]
ENSMUSG00000040596	293.823	219.67	0.37413	0.00023161	0.0042865	Pogk	protein_coding	pogo transposable element with KRAB domain [Source:MGI Symbol;Acc:MGI:1918842]
ENSMUSG00000054199	199.754	154.02	0.34074	0.00023295	0.0043044	Gon4l	protein_coding	gon-4-like (C.elegans) [Source:MGI Symbol;Acc:MGI:1917579]
ENSMUSG00000038400	667.105	518.372	0.33415	0.00023354	0.0043044	Pmepa1	protein_coding	prostate transmembrane protein, androgen induced 1 [Source:MGI Symbol;Acc:MGI:1929600]
ENSMUSG00000005161	5202.55	6170.54	-0.2361	0.00023335	0.0043044	Prdx2	protein_coding	peroxiredoxin 2 [Source:MGI Symbol;Acc:MGI:109486]
ENSMUSG00000028932	1690.64	1942.35	-0.19477	0.00023426	0.0043117	Psmc2	protein_coding	proteasome (prosome, macropain) 26S subunit, ATPase 2 [Source:MGI Symbol;Acc:MGI:109555]
ENSMUSG00000046711	658.474	824.031	-0.30179	0.00023461	0.0043124	Hmga1	protein_coding	high mobility group AT-hook 1 [Source:MGI Symbol;Acc:MGI:96160]
ENSMUSG00000028128	271.017	348.44	-0.3313	0.00023638	0.0043389	F3	protein_coding	coagulation factor III [Source:MGI Symbol;Acc:MGI:88381]
ENSMUSG00000010911	900.623	1058.63	-0.22473	0.00023847	0.0043715	Apip	protein_coding	APAF1 interacting protein [Source:MGI Symbol;Acc:MGI:1926788]
ENSMUSG00000028393	643.85	811.36	-0.30968	0.0002388	0.0043715	Alad	protein_coding	aminolevulinate, delta-, dehydratase [Source:MGI Symbol;Acc:MGI:96853]
ENSMUSG00000035781	714.921	833.621	-0.21433	0.00023949	0.0043783	R3hdm4	protein_coding	R3H domain containing 4 [Source:MGI Symbol;Acc:MGI:1924814]
ENSMUSG00000022961	2570.83	1867.26	0.40064	0.00024204	0.0044188	Son	protein_coding	Son DNA binding protein [Source:MGI Symbol;Acc:MGI:98353]
ENSMUSG00000031214	145.639	101.05	0.44312	0.00024241	0.0044189	Ophn1	protein_coding	oligophrenin 1 [Source:MGI Symbol;Acc:MGI:2151070]
ENSMUSG00000019837	324.212	397.407	-0.27756	0.0002427	0.0044189	Gtf3c6	protein_coding	general transcription factor IIIC, polypeptide 6, alpha [Source:MGI Symbol;Acc:MGI:1914621]
ENSMUSG00000028047	97.4089	66.3087	0.45694	0.00024353	0.0044281	Thbs3	protein_coding	thrombospondin 3 [Source:MGI Symbol;Acc:MGI:98739]
ENSMUSG00000020022	5649.33	6664.35	-0.22911	0.00024536	0.0044494	Ndufa12	protein_coding	NADH dehydrogenase (ubiquinone) 1 alpha subcomplex, 12 [Source:MGI Symbol;Acc:MGI:1913664]
ENSMUSG00000002279	327.297	405.308	-0.2905	0.00024514	0.0044494	Lmf1	protein_coding	lipase maturation factor 1 [Source:MGI Symbol;Acc:MGI:1923733]
ENSMUSG00000001663	396.364	513.334	-0.33949	0.00024851	0.0045004	Gstt1	protein_coding	glutathione S-transferase, theta 1 [Source:MGI Symbol;Acc:MGI:107379]
ENSMUSG00000052713	166.237	106.373	0.49505	0.00025051	0.0045259	Zfp608	protein_coding	zinc finger protein 608 [Source:MGI Symbol;Acc:MGI:2442338]
ENSMUSG00000051306	157.481	117.409	0.37818	0.00025058	0.0045259	Usp42	protein_coding	ubiquitin specific peptidase 42 [Source:MGI Symbol;Acc:MGI:1924050]
ENSMUSG00000002741	1248.28	1423.2	-0.18477	0.00025123	0.0045315	Ykt6	protein_coding	YKT6 homolog (S. Cerevisiae) [Source:MGI Symbol;Acc:MGI:1927550]
ENSMUSG00000033577	284.373	219.052	0.33788	0.00025306	0.0045585	Myo6	protein_coding	myosin VI [Source:MGI Symbol;Acc:MGI:104785]
ENSMUSG00000002308	242.244	310.149	-0.32594	0.00025535	0.0045937	Cd320	protein_coding	CD320 antigen [Source:MGI Symbol;Acc:MGI:1860083]
ENSMUSG00000028745	3262.51	3596.52	-0.13886	0.00025699	0.0046066	Capzb	protein_coding	capping protein (actin filament) muscle Z-line, beta [Source:MGI Symbol;Acc:MGI:104652]
ENSMUSG00000024507	1745.32	2033.79	-0.21393	0.00025666	0.0046066	Hsd17b4	protein_coding	hydroxysteroid (17-beta) dehydrogenase 4 [Source:MGI Symbol;Acc:MGI:105089]
ENSMUSG00000021799	60.3407	89.5467	-0.46118	0.00025709	0.0046066	Opn4	protein_coding	opsin 4 (melanopsin) [Source:MGI Symbol;Acc:MGI:1353425]
ENSMUSG00000024346	937.92	1078.12	-0.19519	0.00025833	0.0046226	Pfdn1	protein_coding	prefoldin 1 [Source:MGI Symbol;Acc:MGI:1914449]
ENSMUSG00000071650	965.022	823.351	0.22198	0.00025936	0.0046348	Ganab	protein_coding	alpha glucosidase 2 alpha neutral subunit [Source:MGI Symbol;Acc:MGI:1097667]
ENSMUSG00000053398	49.8387	29.5263	0.53288	0.00026202	0.0046646	Phgdh	protein_coding	3-phosphoglycerate dehydrogenase [Source:MGI Symbol;Acc:MGI:1355330]
ENSMUSG00000019864	938.914	1119.16	-0.24271	0.00026206	0.0046646	Rtn4ip1	protein_coding	reticulon 4 interacting protein 1 [Source:MGI Symbol;Acc:MGI:2178759]
ENSMUSG00000030595	346.923	434.964	-0.3036	0.00026185	0.0046646	Nfkbib	protein_coding	nuclear factor of kappa light polypeptide gene enhancer in B cells inhibitor, beta [Source:MGI Symbol;Acc:MGI:104752]
ENSMUSG00000035545	1096.69	737.032	0.46354	0.00026374	0.0046883	Leng8	protein_coding	leukocyte receptor cluster (LRC) member 8 [Source:MGI Symbol;Acc:MGI:2142195]
ENSMUSG00000036241	2777.44	3081.85	-0.148	0.00026561	0.0047092	Ube2r2	protein_coding	ubiquitin-conjugating enzyme E2R 2 [Source:MGI Symbol;Acc:MGI:1914865]
ENSMUSG00000033044	1743.46	2061.2	-0.23201	0.0002654	0.0047092	Dhrs7c	protein_coding	dehydrogenase/reductase (SDR family) member 7C [Source:MGI Symbol;Acc:MGI:1915710]
ENSMUSG00000024440	313.244	204.792	0.48146	0.00026694	0.0047265	Pcdh12	protein_coding	protocadherin 12 [Source:MGI Symbol;Acc:MGI:1855700]
ENSMUSG00000021417	1820.05	2122.32	-0.21426	0.00026924	0.004761	Eci2	protein_coding	enoyl-Coenzyme A delta isomerase 2 [Source:MGI Symbol;Acc:MGI:1346064]
ENSMUSG00000039914	3304.74	3773.22	-0.18641	0.00026959	0.0047611	Coq10a	protein_coding	coenzyme Q10 homolog A (yeast) [Source:MGI Symbol;Acc:MGI:2684847]
ENSMUSG00000047497	20.9868	7.58192	0.57514	0.00027185	0.0047838	Adamts12	protein_coding	a disintegrin-like and metallopeptidase (reprolysin type) with thrombospondin type 1 motif, 12 [Source:MGI Symbol;Acc:MGI:2146046]
ENSMUSG00000023020	2519.53	2937.53	-0.21399	0.00027194	0.0047838	Cox14	protein_coding	cytochrome c oxidase assembly protein 14 [Source:MGI Symbol;Acc:MGI:1913629]
ENSMUSG00000024053	671.223	883.486	-0.35581	0.00027151	0.0047838	Emilin2	protein_coding	elastin microfibril interfacer 2 [Source:MGI Symbol;Acc:MGI:2389136]
ENSMUSG00000037740	679.963	840.056	-0.28651	0.00027272	0.0047912	Mrps26	protein_coding	mitochondrial ribosomal protein S26 [Source:MGI Symbol;Acc:MGI:1333830]
ENSMUSG00000021704	213.688	146.322	0.45073	0.00027454	0.0048169	Mtx3	protein_coding	metaxin 3 [Source:MGI Symbol;Acc:MGI:2686040]
ENSMUSG00000031652	473.284	398.079	0.24027	0.00028008	0.0049077	N4bp1	protein_coding	NEDD4 binding protein 1 [Source:MGI Symbol;Acc:MGI:2136825]
ENSMUSG00000048154	1069.66	867.824	0.28424	0.0002809	0.0049157	Kmt2d	protein_coding	lysine (K)-specific methyltransferase 2D [Source:MGI Symbol;Acc:MGI:2682319]
ENSMUSG00000091898	31259.8	35589.6	-0.18245	0.00028199	0.0049285	Tnnc1	protein_coding	troponin C, cardiac/slow skeletal [Source:MGI Symbol;Acc:MGI:98779]
ENSMUSG00000038216	14.334	35.3197	-0.58228	0.00028288	0.0049375	Pnmt	protein_coding	phenylethanolamine-N-methyltransferase [Source:MGI Symbol;Acc:MGI:97724]
ENSMUSG00000028538	738.459	849.319	-0.19642	0.00028381	0.0049475	St3gal3	protein_coding	ST3 beta-galactoside alpha-2,3-sialyltransferase 3 [Source:MGI Symbol;Acc:MGI:1316659]
ENSMUSG00000022822	627.556	446.599	0.41829	0.0002857	0.004967	Abcc5	protein_coding	ATP-binding cassette, sub-family C (CFTR/MRP), member 5 [Source:MGI Symbol;Acc:MGI:1351644]
ENSMUSG00000031983	1484.64	1211.45	0.2755	0.0002864	0.004967	2310022B05Rik	protein_coding	RIKEN cDNA 2310022B05 gene [Source:MGI Symbol;Acc:MGI:1916801]
ENSMUSG00000064254	519.934	661.861	-0.32041	0.00028639	0.004967	Ethe1	protein_coding	ethylmalonic encephalopathy 1 [Source:MGI Symbol;Acc:MGI:1913321]
ENSMUSG00000045237	161.075	208.893	-0.33988	0.0002864	0.004967	1110012L19Rik	protein_coding	RIKEN cDNA 1110012L19 gene [Source:MGI Symbol;Acc:MGI:1915868]
ENSMUSG00000018363	772.101	625.09	0.28652	0.00029084	0.0050375	Smurf2	protein_coding	SMAD specific E3 ubiquitin protein ligase 2 [Source:MGI Symbol;Acc:MGI:1913563]
ENSMUSG00000030546	203.759	38.6979	0.4882	0.00029244	0.0050587	Plin1	protein_coding	perilipin 1 [Source:MGI Symbol;Acc:MGI:1890505]
ENSMUSG00000027712	1695.52	1419.57	0.24448	0.00029308	0.0050632	Anxa5	protein_coding	annexin A5 [Source:MGI Symbol;Acc:MGI:106008]
ENSMUSG00000046182	254.382	339.077	-0.36932	0.00029595	0.0050998	Gsg1l	protein_coding	GSG1-like [Source:MGI Symbol;Acc:MGI:2685483]
ENSMUSG00000036452	688.655	920.654	-0.37067	0.0002959	0.0050998	Arhgap26	protein_coding	Rho GTPase activating protein 26 [Source:MGI Symbol;Acc:MGI:1918552]
ENSMUSG00000064215	657.842	442.673	0.46107	0.00029702	0.0051117	Ifi27	protein_coding	interferon, alpha-inducible protein 27 [Source:MGI Symbol;Acc:MGI:1277180]
ENSMUSG00000022353	596.99	472.129	0.31188	0.00029766	0.0051162	Mtss1	protein_coding	metastasis suppressor 1 [Source:MGI Symbol;Acc:MGI:2384818]
ENSMUSG00000050565	924.504	1070.18	-0.20334	0.00030084	0.0051643	Tor1aip2	protein_coding	torsin A interacting protein 2 [Source:MGI Symbol;Acc:MGI:3582695]
ENSMUSG00000030225	57.8758	87.5998	-0.47476	0.00030305	0.0051957	Dera	protein_coding	2-deoxyribose-5-phosphate aldolase homolog (C. elegans) [Source:MGI Symbol;Acc:MGI:1913762]
ENSMUSG00000000056	1330.7	1685.19	-0.31375	0.00030434	0.0052111	Narf	protein_coding	nuclear prelamin A recognition factor [Source:MGI Symbol;Acc:MGI:1914858]
ENSMUSG00000024193	645.471	531.67	0.26313	0.00030618	0.0052294	Phf1	protein_coding	PHD finger protein 1 [Source:MGI Symbol;Acc:MGI:98647]
ENSMUSG00000002748	1312.22	1095.03	0.24979	0.00030616	0.0052294	Baz1b	protein_coding	bromodomain adjacent to zinc finger domain, 1B [Source:MGI Symbol;Acc:MGI:1353499]
ENSMUSG00000039031	376.114	264.799	0.42413	0.00030818	0.0052509	Arhgap18	protein_coding	Rho GTPase activating protein 18 [Source:MGI Symbol;Acc:MGI:1921160]
ENSMUSG00000031533	679.079	794.403	-0.21799	0.00030822	0.0052509	Mrps31	protein_coding	mitochondrial ribosomal protein S31 [Source:MGI Symbol;Acc:MGI:1913153]
ENSMUSG00000040564	24.0711	7.00011	0.54137	0.00030968	0.0052692	Apoc1	protein_coding	apolipoprotein C-I [Source:MGI Symbol;Acc:MGI:88053]
ENSMUSG00000060012	148.15	108.138	0.39122	0.00031067	0.0052794	Kif13b	protein_coding	kinesin family member 13B [Source:MGI Symbol;Acc:MGI:1098265]
ENSMUSG00000006412	718.417	847.712	-0.22973	0.00031642	0.0053637	Pfdn2	protein_coding	prefoldin 2 [Source:MGI Symbol;Acc:MGI:1276111]
ENSMUSG00000067071	361.13	482.035	-0.36982	0.00031603	0.0053637	Hes6	protein_coding	hairy and enhancer of split 6 [Source:MGI Symbol;Acc:MGI:1859852]
ENSMUSG00000025959	179.354	127.828	0.41731	0.00031872	0.0053945	Klf7	protein_coding	Kruppel-like factor 7 (ubiquitous) [Source:MGI Symbol;Acc:MGI:1935151]
ENSMUSG00000075514	521.987	693.685	-0.36487	0.00031904	0.0053945	Gm13375	antisense	predicted gene 13375 [Source:MGI Symbol;Acc:MGI:3649913]
ENSMUSG00000030541	46530.5	54458.7	-0.21862	0.00031979	0.0054005	Idh2	protein_coding	isocitrate dehydrogenase 2 (NADP+), mitochondrial [Source:MGI Symbol;Acc:MGI:96414]
ENSMUSG00000032398	397.164	475.753	-0.24846	0.0003212	0.0054081	Snapc5	protein_coding	small nuclear RNA activating complex, polypeptide 5 [Source:MGI Symbol;Acc:MGI:1914282]
ENSMUSG00000019478	209.753	271.309	-0.33683	0.00032144	0.0054081	Rab4a	protein_coding	RAB4A, member RAS oncogene family [Source:MGI Symbol;Acc:MGI:105069]
ENSMUSG00000004996	229.323	319.225	-0.40926	0.0003209	0.0054081	Mri1	protein_coding	methylthioribose-1-phosphate isomerase homolog (S. cerevisiae) [Source:MGI Symbol;Acc:MGI:1915123]
ENSMUSG00000047485	100.65	66.0766	0.47688	0.00032409	0.0054343	Klhl34	protein_coding	kelch-like 34 [Source:MGI Symbol;Acc:MGI:2685234]
ENSMUSG00000025026	1022.63	862.585	0.23426	0.00032421	0.0054343	Add3	protein_coding	adducin 3 (gamma) [Source:MGI Symbol;Acc:MGI:1351615]
ENSMUSG00000049680	918.889	783.486	0.22186	0.00032374	0.0054343	Urgcp	protein_coding	upregulator of cell proliferation [Source:MGI Symbol;Acc:MGI:1919296]
ENSMUSG00000030876	933.282	1071.91	-0.19458	0.00032624	0.0054616	Mettl9	protein_coding	methyltransferase like 9 [Source:MGI Symbol;Acc:MGI:1914862]
ENSMUSG00000074656	1395.71	1607.47	-0.19748	0.00032907	0.0054914	Eif2s2	protein_coding	eukaryotic translation initiation factor 2, subunit 2 (beta) [Source:MGI Symbol;Acc:MGI:1914454]
ENSMUSG00000002984	897.395	1037.48	-0.20341	0.00032924	0.0054914	Tomm40	protein_coding	translocase of outer mitochondrial membrane 40 homolog (yeast) [Source:MGI Symbol;Acc:MGI:1858259]
ENSMUSG00000019975	262.193	328.552	-0.30296	0.00032893	0.0054914	Ikbip	protein_coding	IKBKB interacting protein [Source:MGI Symbol;Acc:MGI:1914704]
ENSMUSG00000029840	980.667	823.404	0.24165	0.00033068	0.0055086	Mtpn	protein_coding	myotrophin [Source:MGI Symbol;Acc:MGI:99445]
ENSMUSG00000027673	4065.33	4734.08	-0.21186	0.0003348	0.0055703	Ndufb5	protein_coding	NADH dehydrogenase (ubiquinone) 1 beta subcomplex, 5 [Source:MGI Symbol;Acc:MGI:1913296]
ENSMUSG00000028488	27.6554	51.5238	-0.55761	0.00034256	0.0056924	Sh3gl2	protein_coding	SH3-domain GRB2-like 2 [Source:MGI Symbol;Acc:MGI:700009]
ENSMUSG00000022562	982.513	1153.64	-0.22285	0.00034353	0.0057016	Oplah	protein_coding	5-oxoprolinase (ATP-hydrolysing) [Source:MGI Symbol;Acc:MGI:1922725]
ENSMUSG00000027582	262.041	200.508	0.34902	0.00034576	0.0057315	Zgpat	protein_coding	zinc finger, CCCH-type with G patch domain [Source:MGI Symbol;Acc:MGI:2449939]
ENSMUSG00000028568	1029.06	1174.8	-0.18716	0.00034666	0.0057343	Btf3l4	protein_coding	basic transcription factor 3-like 4 [Source:MGI Symbol;Acc:MGI:1915312]
ENSMUSG00000032679	1987.61	2280.47	-0.19262	0.00034677	0.0057343	Cd59a	protein_coding	CD59a antigen [Source:MGI Symbol;Acc:MGI:109177]
ENSMUSG00000100658	20.4115	7.78544	0.56693	0.00034871	0.0057592	RP23-217K18.4	lincRNA	RIKEN cDNA F730311O21 gene [Source:MGI Symbol;Acc:MGI:3643355]
ENSMUSG00000010476	200.272	153.434	0.34476	0.00035003	0.0057739	Ebf3	protein_coding	early B cell factor 3 [Source:MGI Symbol;Acc:MGI:894289]
ENSMUSG00000029726	539.479	677.664	-0.30492	0.00035386	0.00583	Mepce	protein_coding	methylphosphate capping enzyme [Source:MGI Symbol;Acc:MGI:106477]
ENSMUSG00000030067	348.793	277.34	0.30633	0.00035456	0.0058345	Foxp1	protein_coding	forkhead box P1 [Source:MGI Symbol;Acc:MGI:1914004]
ENSMUSG00000036278	5980.72	7374.29	-0.28274	0.00035839	0.0058904	Macrod1	protein_coding	MACRO domain containing 1 [Source:MGI Symbol;Acc:MGI:2147583]
ENSMUSG00000024130	264.595	199.893	0.35819	0.00036021	0.005913	Abca3	protein_coding	ATP-binding cassette, sub-family A (ABC1), member 3 [Source:MGI Symbol;Acc:MGI:1351617]
ENSMUSG00000022237	615.604	465.036	0.36013	0.0003623	0.0059246	Ankrd33b	protein_coding	ankyrin repeat domain 33B [Source:MGI Symbol;Acc:MGI:1917904]
ENSMUSG00000039804	464.402	363.374	0.32311	0.00036265	0.0059246	Ncoa5	protein_coding	nuclear receptor coactivator 5 [Source:MGI Symbol;Acc:MGI:2385165]
ENSMUSG00000029231	618.438	495.86	0.29514	0.00036311	0.0059246	Pdgfra	protein_coding	platelet derived growth factor receptor, alpha polypeptide [Source:MGI Symbol;Acc:MGI:97530]
ENSMUSG00000057388	983.648	1162.07	-0.23023	0.00036275	0.0059246	Mrpl18	protein_coding	mitochondrial ribosomal protein L18 [Source:MGI Symbol;Acc:MGI:1914931]
ENSMUSG00000062563	72.2806	117.156	-0.50876	0.0003629	0.0059246	Cys1	protein_coding	cystin 1 [Source:MGI Symbol;Acc:MGI:2177632]
ENSMUSG00000029101	497.547	414.69	0.25019	0.00036645	0.0059433	Rgs12	protein_coding	regulator of G-protein signaling 12 [Source:MGI Symbol;Acc:MGI:1918979]
ENSMUSG00000027940	986.437	851.308	0.20561	0.00036579	0.0059433	Tpm3	protein_coding	tropomyosin 3, gamma [Source:MGI Symbol;Acc:MGI:1890149]
ENSMUSG00000000171	6450.04	7426.69	-0.19748	0.00036514	0.0059433	Sdhd	protein_coding	succinate dehydrogenase complex, subunit D, integral membrane protein [Source:MGI Symbol;Acc:MGI:1914175]
ENSMUSG00000000184	1310.56	1590.07	-0.26324	0.00036575	0.0059433	Ccnd2	protein_coding	cyclin D2 [Source:MGI Symbol;Acc:MGI:88314]
ENSMUSG00000022357	120.874	251.067	-0.57163	0.00036645	0.0059433	Klhl38	protein_coding	kelch-like 38 [Source:MGI Symbol;Acc:MGI:3045310]
ENSMUSG00000022361	341.823	272.459	0.30348	0.00036726	0.0059492	Zhx1	protein_coding	zinc fingers and homeoboxes 1 [Source:MGI Symbol;Acc:MGI:109271]
ENSMUSG00000032959	5536.48	6375.04	-0.19723	0.00036909	0.0059717	Pebp1	protein_coding	phosphatidylethanolamine binding protein 1 [Source:MGI Symbol;Acc:MGI:1344408]
ENSMUSG00000024870	2956.35	3485.22	-0.228	0.00037486	0.0060506	Rab1b	protein_coding	RAB1B, member RAS oncogene family [Source:MGI Symbol;Acc:MGI:1923558]
ENSMUSG00000045100	524.498	624.215	-0.24021	0.00037473	0.0060506	Slc25a26	protein_coding	solute carrier family 25 (mitochondrial carrier, phosphate carrier), member 26 [Source:MGI Symbol;Acc:MGI:1914832]
ENSMUSG00000040363	464.739	372.876	0.29391	0.00037944	0.00611	Bcor	protein_coding	BCL6 interacting corepressor [Source:MGI Symbol;Acc:MGI:1918708]
ENSMUSG00000027108	559.842	677.778	-0.26135	0.00037915	0.00611	Ola1	protein_coding	Obg-like ATPase 1 [Source:MGI Symbol;Acc:MGI:1914309]
ENSMUSG00000062963	900.583	1036.4	-0.19611	0.00038016	0.0061143	Ufc1	protein_coding	ubiquitin-fold modifier conjugating enzyme 1 [Source:MGI Symbol;Acc:MGI:1913405]
ENSMUSG00000019179	21656.9	25196.9	-0.21075	0.00038061	0.0061143	Mdh2	protein_coding	malate dehydrogenase 2, NAD (mitochondrial) [Source:MGI Symbol;Acc:MGI:97050]
ENSMUSG00000091649	33.4894	14.5085	0.57166	0.00038305	0.0061282	Phf11b	protein_coding	PHD finger protein 11B [Source:MGI Symbol;Acc:MGI:3645789]
ENSMUSG00000021608	244.644	180.859	0.38262	0.00038219	0.0061282	Lpcat1	protein_coding	lysophosphatidylcholine acyltransferase 1 [Source:MGI Symbol;Acc:MGI:2384812]
ENSMUSG00000040713	2300.78	2575.98	-0.15997	0.00038292	0.0061282	Creg1	protein_coding	cellular repressor of E1A-stimulated genes 1 [Source:MGI Symbol;Acc:MGI:1344382]
ENSMUSG00000017969	385.16	470.619	-0.271	0.00038329	0.0061282	Ptgis	protein_coding	prostaglandin I2 (prostacyclin) synthase [Source:MGI Symbol;Acc:MGI:1097156]
ENSMUSG00000029499	574.806	678.261	-0.22988	0.00038879	0.0062087	Pxmp2	protein_coding	peroxisomal membrane protein 2 [Source:MGI Symbol;Acc:MGI:107487]
ENSMUSG00000025986	222.096	160.214	0.40386	0.00039081	0.0062263	Slc39a10	protein_coding	solute carrier family 39 (zinc transporter), member 10 [Source:MGI Symbol;Acc:MGI:1914515]
ENSMUSG00000022797	325.405	469.075	-0.43582	0.00039055	0.0062263	Tfrc	protein_coding	transferrin receptor [Source:MGI Symbol;Acc:MGI:98822]
ENSMUSG00000025917	1185.27	1348.25	-0.18129	0.00039226	0.0062347	Cops5	protein_coding	COP9 (constitutive photomorphogenic) homolog, subunit 5 (Arabidopsis thaliana) [Source:MGI Symbol;Acc:MGI:1349415]
ENSMUSG00000089917	435.628	519.466	-0.243	0.00039198	0.0062347	Uckl1	protein_coding	uridine-cytidine kinase 1-like 1 [Source:MGI Symbol;Acc:MGI:1915806]
ENSMUSG00000010721	226.46	134.71	0.52431	0.00039285	0.0062366	Lmbr1	protein_coding	limb region 1 [Source:MGI Symbol;Acc:MGI:1861746]
ENSMUSG00000020029	4947.18	6142.38	-0.29031	0.00039433	0.0062513	Nudt4	protein_coding	nudix (nucleoside diphosphate linked moiety X)-type motif 4 [Source:MGI Symbol;Acc:MGI:1918457]
ENSMUSG00000024944	582.034	731.728	-0.30449	0.0003947	0.0062513	Arl2	protein_coding	ADP-ribosylation factor-like 2 [Source:MGI Symbol;Acc:MGI:1928393]
ENSMUSG00000026817	10255.6	11836.8	-0.2004	0.00039823	0.0062955	Ak1	protein_coding	adenylate kinase 1 [Source:MGI Symbol;Acc:MGI:87977]
ENSMUSG00000056671	82.9306	123.251	-0.45866	0.00039842	0.0062955	Prelid2	protein_coding	PRELI domain containing 2 [Source:MGI Symbol;Acc:MGI:1924869]
ENSMUSG00000049686	231.045	290.678	-0.30581	0.00040008	0.0063143	Orai1	protein_coding	ORAI calcium release-activated calcium modulator 1 [Source:MGI Symbol;Acc:MGI:1925542]
ENSMUSG00000021838	1236.89	914.446	0.38021	0.00040302	0.0063511	Samd4	protein_coding	sterile alpha motif domain containing 4 [Source:MGI Symbol;Acc:MGI:1921730]
ENSMUSG00000068184	369.79	453.412	-0.27524	0.00040335	0.0063511	Ndufaf2	protein_coding	NADH dehydrogenase (ubiquinone) 1 alpha subcomplex, assembly factor 2 [Source:MGI Symbol;Acc:MGI:1922847]
ENSMUSG00000019907	523.638	390.04	0.37365	0.00040445	0.006361	Ppp1r12a	protein_coding	protein phosphatase 1, regulatory (inhibitor) subunit 12A [Source:MGI Symbol;Acc:MGI:1309528]
ENSMUSG00000000384	1056.61	1213.79	-0.19386	0.00040769	0.0064046	Tbrg4	protein_coding	transforming growth factor beta regulated gene 4 [Source:MGI Symbol;Acc:MGI:1100868]
ENSMUSG00000004815	89.1025	57.483	0.48372	0.00040891	0.0064163	Dgkq	protein_coding	diacylglycerol kinase, theta [Source:MGI Symbol;Acc:MGI:102918]
ENSMUSG00000010376	1585.91	1889.41	-0.24074	0.00041347	0.0064774	Nedd8	protein_coding	neural precursor cell expressed, developmentally down-regulated gene 8 [Source:MGI Symbol;Acc:MGI:97301]
ENSMUSG00000039771	354.925	438.357	-0.2855	0.00041377	0.0064774	Polr2j	protein_coding	polymerase (RNA) II (DNA directed) polypeptide J [Source:MGI Symbol;Acc:MGI:109582]
ENSMUSG00000044864	869.524	700.187	0.28997	0.00041481	0.0064784	Ankrd50	protein_coding	ankyrin repeat domain 50 [Source:MGI Symbol;Acc:MGI:2139777]
ENSMUSG00000021361	1167.46	1351.2	-0.20416	0.00041567	0.0064784	Tmem14c	protein_coding	transmembrane protein 14C [Source:MGI Symbol;Acc:MGI:1913404]
ENSMUSG00000056973	1882.81	2191.81	-0.211	0.00041575	0.0064784	Ces1d	protein_coding	carboxylesterase 1D [Source:MGI Symbol;Acc:MGI:2148202]
ENSMUSG00000020079	405.646	486.241	-0.2486	0.00041563	0.0064784	Supv3l1	protein_coding	suppressor of var1, 3-like 1 (S. cerevisiae) [Source:MGI Symbol;Acc:MGI:2441711]
ENSMUSG00000006315	970.56	1149.83	-0.23379	0.0004166	0.0064842	Tmem147	protein_coding	transmembrane protein 147 [Source:MGI Symbol;Acc:MGI:1915011]
ENSMUSG00000040883	739.248	878.813	-0.23789	0.00041941	0.0065204	Tmem205	protein_coding	transmembrane protein 205 [Source:MGI Symbol;Acc:MGI:3045495]
ENSMUSG00000045827	349.985	278.921	0.30149	0.00042131	0.0065424	Serpinb9	protein_coding	serine (or cysteine) peptidase inhibitor, clade B, member 9 [Source:MGI Symbol;Acc:MGI:106603]
ENSMUSG00000061838	3010.81	3371.32	-0.16012	0.00042319	0.0065615	Suclg2	protein_coding	succinate-Coenzyme A ligase, GDP-forming, beta subunit [Source:MGI Symbol;Acc:MGI:1306824]
ENSMUSG00000014075	87.0188	119.596	-0.39603	0.00042351	0.0065615	Tctex1d2	protein_coding	Tctex1 domain containing 2 [Source:MGI Symbol;Acc:MGI:1913311]
ENSMUSG00000015850	997.442	1237.37	-0.28952	0.0004278	0.0066204	Adamtsl4	protein_coding	ADAMTS-like 4 [Source:MGI Symbol;Acc:MGI:2389008]
ENSMUSG00000026520	280.734	354.482	-0.3106	0.00042996	0.0066393	Pycr2	protein_coding	pyrroline-5-carboxylate reductase family, member 2 [Source:MGI Symbol;Acc:MGI:1277956]
ENSMUSG00000039347	233.331	298.279	-0.32189	0.00043001	0.0066393	Atp6v0e2	protein_coding	ATPase, H+ transporting, lysosomal V0 subunit E2 [Source:MGI Symbol;Acc:MGI:1923502]
ENSMUSG00000067780	73.6077	46.0375	0.4993	0.00043238	0.0066683	Pi15	protein_coding	peptidase inhibitor 15 [Source:MGI Symbol;Acc:MGI:1934659]
ENSMUSG00000044018	1038.58	1209.06	-0.21085	0.00043307	0.0066714	Mrpl50	protein_coding	mitochondrial ribosomal protein L50 [Source:MGI Symbol;Acc:MGI:107329]
ENSMUSG00000038612	3845.55	4658.84	-0.26122	0.00043449	0.0066856	Mcl1	protein_coding	myeloid cell leukemia sequence 1 [Source:MGI Symbol;Acc:MGI:101769]
ENSMUSG00000021932	178.057	226.703	-0.31793	0.00043904	0.0067479	Rnaseh2b	protein_coding	ribonuclease H2, subunit B [Source:MGI Symbol;Acc:MGI:1914403]
ENSMUSG00000018168	17.6118	6.16714	0.54781	0.00043959	0.0067488	Ikzf3	protein_coding	IKAROS family zinc finger 3 [Source:MGI Symbol;Acc:MGI:1342542]
ENSMUSG00000021782	203.12	149.956	0.38124	0.00044325	0.0067971	Dlg5	protein_coding	discs, large homolog 5 (Drosophila) [Source:MGI Symbol;Acc:MGI:1918478]
ENSMUSG00000033799	267.607	207.948	0.33257	0.00044776	0.0068585	Fam208b	protein_coding	family with sequence similarity 208, member B [Source:MGI Symbol;Acc:MGI:2145274]
ENSMUSG00000019710	510.931	593.964	-0.2085	0.00044923	0.0068719	Mrpl24	protein_coding	mitochondrial ribosomal protein L24 [Source:MGI Symbol;Acc:MGI:1914957]
ENSMUSG00000029465	954.971	1133.85	-0.23607	0.00044965	0.0068719	Arpc3	protein_coding	actin related protein 2/3 complex, subunit 3 [Source:MGI Symbol;Acc:MGI:1928375]
ENSMUSG00000051343	1417.07	1131.19	0.29965	0.00045284	0.0069051	Rab11fip5	protein_coding	RAB11 family interacting protein 5 (class I) [Source:MGI Symbol;Acc:MGI:1098586]
ENSMUSG00000059447	38923.8	43391.5	-0.15383	0.00045245	0.0069051	Hadhb	protein_coding	hydroxyacyl-Coenzyme A dehydrogenase/3-ketoacyl-Coenzyme A thiolase/enoyl-Coenzyme A hydratase (trifunctional protein), beta subunit [Source:MGI Symbol;Acc:MGI:2136381]
ENSMUSG00000050821	470.558	588.372	-0.29944	0.00045424	0.0069186	Fam131a	protein_coding	family with sequence similarity 131, member A [Source:MGI Symbol;Acc:MGI:1925658]
ENSMUSG00000042524	1967.85	1688.48	0.21243	0.00045673	0.0069487	Sun2	protein_coding	Sad1 and UNC84 domain containing 2 [Source:MGI Symbol;Acc:MGI:2443011]
ENSMUSG00000020661	665.654	518.616	0.32679	0.00045729	0.0069494	Dnmt3a	protein_coding	DNA methyltransferase 3A [Source:MGI Symbol;Acc:MGI:1261827]
ENSMUSG00000005534	2697.36	2079.46	0.33819	0.00045813	0.0069543	Insr	protein_coding	insulin receptor [Source:MGI Symbol;Acc:MGI:96575]
ENSMUSG00000024457	369.931	301.022	0.27959	0.00045904	0.0069598	Trim26	protein_coding	tripartite motif-containing 26 [Source:MGI Symbol;Acc:MGI:1337056]
ENSMUSG00000024038	3763.88	4348.98	-0.20153	0.00045952	0.0069598	Ndufv3	protein_coding	NADH dehydrogenase (ubiquinone) flavoprotein 3 [Source:MGI Symbol;Acc:MGI:1890894]
ENSMUSG00000022863	209.187	166.14	0.30665	0.00046171	0.006984	Btg3	protein_coding	B cell translocation gene 3 [Source:MGI Symbol;Acc:MGI:109532]
ENSMUSG00000001729	2985.45	3465.69	-0.2079	0.00046215	0.006984	Akt1	protein_coding	thymoma viral proto-oncogene 1 [Source:MGI Symbol;Acc:MGI:87986]
ENSMUSG00000000131	480.733	325.26	0.45199	0.00046372	0.0069998	Xpo6	protein_coding	exportin 6 [Source:MGI Symbol;Acc:MGI:2429950]
ENSMUSG00000035642	555.245	676.946	-0.26823	0.00046501	0.0070115	Aamdc	protein_coding	adipogenesis associated Mth938 domain containing [Source:MGI Symbol;Acc:MGI:1913523]
ENSMUSG00000070873	38.0417	21.144	0.53831	0.0004759	0.0071532	Lilra5	protein_coding	leukocyte immunoglobulin-like receptor, subfamily A (with TM domain), member 5 [Source:MGI Symbol;Acc:MGI:3647196]
ENSMUSG00000020844	400.304	318.252	0.30704	0.00047539	0.0071532	Nxn	protein_coding	nucleoredoxin [Source:MGI Symbol;Acc:MGI:109331]
ENSMUSG00000025791	3396.12	3911.67	-0.19773	0.000476	0.0071532	Pgm2	protein_coding	phosphoglucomutase 2 [Source:MGI Symbol;Acc:MGI:97565]
ENSMUSG00000031818	21318.6	24979.4	-0.21956	0.00047834	0.0071645	Cox4i1	protein_coding	cytochrome c oxidase subunit IV isoform 1 [Source:MGI Symbol;Acc:MGI:88473]
ENSMUSG00000001445	667.786	818.684	-0.27627	0.00047829	0.0071645	Mrpl10	protein_coding	mitochondrial ribosomal protein L10 [Source:MGI Symbol;Acc:MGI:1333801]
ENSMUSG00000025218	189.04	243.005	-0.32802	0.00047738	0.0071645	Poll	protein_coding	polymerase (DNA directed), lambda [Source:MGI Symbol;Acc:MGI:1889000]
ENSMUSG00000013539	2486.38	2860.46	-0.19566	0.00048097	0.007196	Tango2	protein_coding	transport and golgi organization 2 [Source:MGI Symbol;Acc:MGI:101825]
ENSMUSG00000037490	164.223	118.151	0.40109	0.00048239	0.0072092	Slc2a12	protein_coding	solute carrier family 2 (facilitated glucose transporter), member 12 [Source:MGI Symbol;Acc:MGI:3052471]
ENSMUSG00000031486	410.791	323.503	0.31436	0.00048344	0.0072169	Gpr124	protein_coding	G protein-coupled receptor 124 [Source:MGI Symbol;Acc:MGI:1925810]
ENSMUSG00000002668	35.3245	19.2431	0.54566	0.00048428	0.0072215	Dennd1c	protein_coding	DENN/MADD domain containing 1C [Source:MGI Symbol;Acc:MGI:1918035]
ENSMUSG00000024764	291.352	222.692	0.34578	0.0004851	0.0072256	Naa40	protein_coding	N(alpha)-acetyltransferase 40, NatD catalytic subunit, homolog (S. cerevisiae) [Source:MGI Symbol;Acc:MGI:1918249]
ENSMUSG00000024429	696.618	839.752	-0.25531	0.00048629	0.0072355	Gnl1	protein_coding	guanine nucleotide binding protein-like 1 [Source:MGI Symbol;Acc:MGI:95764]
ENSMUSG00000026260	7779.6	8758.43	-0.1671	0.00049121	0.0073006	Ndufa10	protein_coding	NADH dehydrogenase (ubiquinone) 1 alpha subcomplex 10 [Source:MGI Symbol;Acc:MGI:1914523]
ENSMUSG00000032243	57.6054	31.5989	0.54244	0.00049262	0.0073135	Itga11	protein_coding	integrin alpha 11 [Source:MGI Symbol;Acc:MGI:2442114]
ENSMUSG00000019494	2023.91	2333.61	-0.19908	0.00049787	0.0073833	Cops6	protein_coding	COP9 (constitutive photomorphogenic) homolog, subunit 6 (Arabidopsis thaliana) [Source:MGI Symbol;Acc:MGI:1349439]
ENSMUSG00000040651	339.678	251.867	0.37685	0.00049887	0.0073901	Fam208a	protein_coding	family with sequence similarity 208, member A [Source:MGI Symbol;Acc:MGI:1921694]
ENSMUSG00000024208	1321.2	1610.61	-0.26829	0.00049951	0.0073915	Uqcc2	protein_coding	ubiquinol-cytochrome c reductase complex assembly factor 2 [Source:MGI Symbol;Acc:MGI:1914517]
ENSMUSG00000020644	196.166	125.752	0.48361	0.00050046	0.0073973	Id2	protein_coding	inhibitor of DNA binding 2 [Source:MGI Symbol;Acc:MGI:96397]
ENSMUSG00000044938	1738.07	1474.12	0.22789	0.00050183	0.0074095	Klhl31	protein_coding	kelch-like 31 [Source:MGI Symbol;Acc:MGI:3045305]
ENSMUSG00000078234	142.215	79.9481	0.53487	0.00050363	0.0074279	Klhdc7a	protein_coding	kelch domain containing 7A [Source:MGI Symbol;Acc:MGI:2444612]
ENSMUSG00000025781	18790.5	21334.4	-0.17846	0.00050458	0.0074339	Atp5c1	protein_coding	ATP synthase, H+ transporting, mitochondrial F1 complex, gamma polypeptide 1 [Source:MGI Symbol;Acc:MGI:1261437]
ENSMUSG00000068748	27.8445	13.9994	0.55558	0.00050802	0.0074765	Ptprz1	protein_coding	protein tyrosine phosphatase, receptor type Z, polypeptide 1 [Source:MGI Symbol;Acc:MGI:97816]
ENSMUSG00000030417	1209.35	1382.84	-0.18688	0.0005087	0.0074783	Pdcd5	protein_coding	programmed cell death 5 [Source:MGI Symbol;Acc:MGI:1913538]
ENSMUSG00000020640	421.339	326.251	0.33244	0.00051093	0.0075023	Itsn2	protein_coding	intersectin 2 [Source:MGI Symbol;Acc:MGI:1338049]
ENSMUSG00000031231	10700	12535.4	-0.21928	0.00051144	0.0075023	Cox7b	protein_coding	cytochrome c oxidase subunit VIIb [Source:MGI Symbol;Acc:MGI:1913392]
ENSMUSG00000040865	361.661	284.993	0.31706	0.0005128	0.007514	Ino80d	protein_coding	INO80 complex subunit D [Source:MGI Symbol;Acc:MGI:3027003]
ENSMUSG00000049960	671.784	805.449	-0.24801	0.00051712	0.0075692	Mrps16	protein_coding	mitochondrial ribosomal protein S16 [Source:MGI Symbol;Acc:MGI:1913492]
ENSMUSG00000035597	280.131	191.912	0.44256	0.00051854	0.0075786	Prpf39	protein_coding	PRP39 pre-mRNA processing factor 39 homolog (yeast) [Source:MGI Symbol;Acc:MGI:104602]
ENSMUSG00000003438	867.466	1001.37	-0.20059	0.00051943	0.0075786	Timm50	protein_coding	translocase of inner mitochondrial membrane 50 [Source:MGI Symbol;Acc:MGI:1913775]
ENSMUSG00000039096	208.212	265.56	-0.32278	0.00051945	0.0075786	Rsad1	protein_coding	radical S-adenosyl methionine domain containing 1 [Source:MGI Symbol;Acc:MGI:3039628]
ENSMUSG00000021185	938.886	1090.75	-0.20841	0.00052143	0.0075993	9030617O03Rik	protein_coding	RIKEN cDNA 9030617O03 gene [Source:MGI Symbol;Acc:MGI:2444813]
ENSMUSG00000061046	111.627	161.652	-0.43594	0.00052349	0.0076211	Haghl	protein_coding	hydroxyacylglutathione hydrolase-like [Source:MGI Symbol;Acc:MGI:1919877]
ENSMUSG00000034566	15753.8	17882.3	-0.1781	0.00052484	0.0076325	Atp5h	protein_coding	ATP synthase, H+ transporting, mitochondrial F0 complex, subunit D [Source:MGI Symbol;Acc:MGI:1918929]
ENSMUSG00000001930	1071.9	891.323	0.25241	0.00052979	0.0076961	Vwf	protein_coding	Von Willebrand factor homolog [Source:MGI Symbol;Acc:MGI:98941]
ENSMUSG00000060679	1298.57	1514.89	-0.21445	0.00053048	0.0076979	Mrps9	protein_coding	mitochondrial ribosomal protein S9 [Source:MGI Symbol;Acc:MGI:1916777]
ENSMUSG00000025260	2408.96	2807.51	-0.21293	0.00053386	0.0077386	Hsd17b10	protein_coding	hydroxysteroid (17-beta) dehydrogenase 10 [Source:MGI Symbol;Acc:MGI:1333871]
ENSMUSG00000028247	866.049	1006.31	-0.20899	0.00054171	0.0078441	Coq3	protein_coding	coenzyme Q3 homolog, methyltransferase (yeast) [Source:MGI Symbol;Acc:MGI:101813]
ENSMUSG00000031673	157.812	121.596	0.33954	0.00054273	0.0078504	Cdh11	protein_coding	cadherin 11 [Source:MGI Symbol;Acc:MGI:99217]
ENSMUSG00000030846	833.21	675.078	0.28385	0.00054479	0.0078718	Tial1	protein_coding	Tia1 cytotoxic granule-associated RNA binding protein-like 1 [Source:MGI Symbol;Acc:MGI:107913]
ENSMUSG00000040112	1141.38	1313.97	-0.19602	0.00054922	0.0079274	Mrps35	protein_coding	mitochondrial ribosomal protein S35 [Source:MGI Symbol;Acc:MGI:2385255]
ENSMUSG00000033429	1101.12	1278.41	-0.20824	0.0005508	0.0079417	Mcee	protein_coding	methylmalonyl CoA epimerase [Source:MGI Symbol;Acc:MGI:1920974]
ENSMUSG00000022610	426.592	509.388	-0.24256	0.00055141	0.007942	Mapk12	protein_coding	mitogen-activated protein kinase 12 [Source:MGI Symbol;Acc:MGI:1353438]
ENSMUSG00000017737	55.388	32.6608	0.51745	0.00055321	0.0079424	Mmp9	protein_coding	matrix metallopeptidase 9 [Source:MGI Symbol;Acc:MGI:97011]
ENSMUSG00000062329	324.549	258.363	0.30406	0.00055267	0.0079424	Cytl1	protein_coding	cytokine-like 1 [Source:MGI Symbol;Acc:MGI:2684993]
ENSMUSG00000050440	102.479	165.379	-0.49779	0.00055274	0.0079424	Hamp	protein_coding	hepcidin antimicrobial peptide [Source:MGI Symbol;Acc:MGI:1933533]
ENSMUSG00000031207	2571.34	2304.16	0.15505	0.00055583	0.0079716	Msn	protein_coding	moesin [Source:MGI Symbol;Acc:MGI:97167]
ENSMUSG00000020163	9018.43	10730.5	-0.23865	0.00055663	0.0079746	Uqcr11	protein_coding	ubiquinol-cytochrome c reductase, complex III subunit XI [Source:MGI Symbol;Acc:MGI:1913844]
ENSMUSG00000003812	101.102	139.93	-0.39867	0.00055727	0.0079754	Dnase2a	protein_coding	deoxyribonuclease II alpha [Source:MGI Symbol;Acc:MGI:1329019]
ENSMUSG00000000149	2088.54	2553.36	-0.27161	0.00055996	0.0080053	Gna12	protein_coding	guanine nucleotide binding protein, alpha 12 [Source:MGI Symbol;Acc:MGI:95767]
ENSMUSG00000023411	155.729	117.324	0.36265	0.00056169	0.0080216	Nfatc4	protein_coding	nuclear factor of activated T cells, cytoplasmic, calcineurin dependent 4 [Source:MGI Symbol;Acc:MGI:1920431]
ENSMUSG00000024654	866.54	995.161	-0.19362	0.00056309	0.0080332	Asrgl1	protein_coding	asparaginase like 1 [Source:MGI Symbol;Acc:MGI:1913764]
ENSMUSG00000005575	2474.97	2937.17	-0.23554	0.00056386	0.0080355	Ube2m	protein_coding	ubiquitin-conjugating enzyme E2M [Source:MGI Symbol;Acc:MGI:108278]
ENSMUSG00000001829	1318.77	1506.56	-0.1869	0.00056467	0.0080387	Clpb	protein_coding	ClpB caseinolytic peptidase B [Source:MGI Symbol;Acc:MGI:1100517]
ENSMUSG00000036398	947.425	1103.48	-0.21156	0.00056805	0.0080698	Ppp1r11	protein_coding	protein phosphatase 1, regulatory (inhibitor) subunit 11 [Source:MGI Symbol;Acc:MGI:1923747]
ENSMUSG00000028420	403.607	485.929	-0.25352	0.00056795	0.0080698	Tmem38b	protein_coding	transmembrane protein 38B [Source:MGI Symbol;Acc:MGI:1098718]
ENSMUSG00000024747	24.5868	5.17726	0.46677	0.0005688	0.008072	Aldh1a7	protein_coding	aldehyde dehydrogenase family 1, subfamily A7 [Source:MGI Symbol;Acc:MGI:1347050]
ENSMUSG00000001441	1432.13	1653.19	-0.19955	0.00056967	0.0080758	Npepps	protein_coding	aminopeptidase puromycin sensitive [Source:MGI Symbol;Acc:MGI:1101358]
ENSMUSG00000070699	195.831	256.515	-0.34841	0.00057056	0.0080799	Sars2	protein_coding	seryl-aminoacyl-tRNA synthetase 2 [Source:MGI Symbol;Acc:MGI:1919234]
ENSMUSG00000026395	165.532	93.0065	0.53218	0.00057203	0.0080923	Ptprc	protein_coding	protein tyrosine phosphatase, receptor type, C [Source:MGI Symbol;Acc:MGI:97810]
ENSMUSG00000023939	698.644	883.864	-0.31063	0.0005739	0.0081102	Mrpl14	protein_coding	mitochondrial ribosomal protein L14 [Source:MGI Symbol;Acc:MGI:1333864]
ENSMUSG00000037032	1889.71	2343.32	-0.28802	0.00057472	0.0081133	Apbb1	protein_coding	amyloid beta (A4) precursor protein-binding, family B, member 1 [Source:MGI Symbol;Acc:MGI:107765]
ENSMUSG00000056494	58.8033	36.7572	0.49434	0.00057926	0.0081689	Cngb3	protein_coding	cyclic nucleotide gated channel beta 3 [Source:MGI Symbol;Acc:MGI:1353562]
ENSMUSG00000041193	738.756	936.044	-0.31259	0.00058047	0.0081775	Pla2g5	protein_coding	phospholipase A2, group V [Source:MGI Symbol;Acc:MGI:101899]
ENSMUSG00000026576	4096.74	4631.05	-0.17258	0.00058774	0.0082711	Atp1b1	protein_coding	ATPase, Na+/K+ transporting, beta 1 polypeptide [Source:MGI Symbol;Acc:MGI:88108]
ENSMUSG00000021967	533.758	665.869	-0.29504	0.00058928	0.0082842	Mrpl57	protein_coding	mitochondrial ribosomal protein L53 [Source:MGI Symbol;Acc:MGI:1915090]
ENSMUSG00000022354	9153.52	10579.6	-0.20171	0.00059264	0.008309	Ndufb9	protein_coding	NADH dehydrogenase (ubiquinone) 1 beta subcomplex, 9 [Source:MGI Symbol;Acc:MGI:1913468]
ENSMUSG00000021390	1583.53	1868.81	-0.22876	0.00059219	0.008309	Ogn	protein_coding	osteoglycin [Source:MGI Symbol;Acc:MGI:109278]
ENSMUSG00000020388	283.739	360.293	-0.3138	0.00059289	0.008309	Pdlim4	protein_coding	PDZ and LIM domain 4 [Source:MGI Symbol;Acc:MGI:1353470]
ENSMUSG00000063511	976.107	762.695	0.32354	0.0005991	0.00837	Snrnp70	protein_coding	small nuclear ribonucleoprotein 70 (U1) [Source:MGI Symbol;Acc:MGI:98341]
ENSMUSG00000027227	2788.97	3297.14	-0.23057	0.00059823	0.00837	Sord	protein_coding	sorbitol dehydrogenase [Source:MGI Symbol;Acc:MGI:98266]
ENSMUSG00000027030	1515.64	1842.21	-0.26432	0.00059899	0.00837	Stk39	protein_coding	serine/threonine kinase 39 [Source:MGI Symbol;Acc:MGI:1858416]
ENSMUSG00000004937	1569.73	1854.29	-0.22991	0.00060475	0.0084403	Sgta	protein_coding	small glutamine-rich tetratricopeptide repeat (TPR)-containing, alpha [Source:MGI Symbol;Acc:MGI:1098703]
ENSMUSG00000070780	23.22	8.85921	0.54075	0.000606	0.0084489	Rbm47	protein_coding	RNA binding motif protein 47 [Source:MGI Symbol;Acc:MGI:2384294]
ENSMUSG00000028085	861.345	987.429	-0.19025	0.00060828	0.008472	Pet112	protein_coding	glutamyl-tRNA(Gln) amidotransferase, subunit B [Source:MGI Symbol;Acc:MGI:2442496]
ENSMUSG00000028480	83.166	56.4921	0.44569	0.00060959	0.0084815	Glipr2	protein_coding	GLI pathogenesis-related 2 [Source:MGI Symbol;Acc:MGI:1917770]
ENSMUSG00000008153	33.5397	9.67389	0.504	0.00061106	0.0084932	Clstn3	protein_coding	calsyntenin 3 [Source:MGI Symbol;Acc:MGI:2178323]
ENSMUSG00000024163	1153.24	993.706	0.20781	0.00061463	0.0085341	Mapk8ip3	protein_coding	mitogen-activated protein kinase 8 interacting protein 3 [Source:MGI Symbol;Acc:MGI:1353598]
ENSMUSG00000027550	169.645	123.201	0.3925	0.00061748	0.0085573	Lrrcc1	protein_coding	leucine rich repeat and coiled-coil domain containing 1 [Source:MGI Symbol;Acc:MGI:1918960]
ENSMUSG00000068699	6459.93	5318.66	0.26351	0.00061757	0.0085573	Flnc	protein_coding	filamin C, gamma [Source:MGI Symbol;Acc:MGI:95557]
ENSMUSG00000019787	3494.66	4142.03	-0.2336	0.00061906	0.0085645	Trdn	protein_coding	triadin [Source:MGI Symbol;Acc:MGI:1924007]
ENSMUSG00000021219	289.266	362.331	-0.29928	0.00061936	0.0085645	Rgs6	protein_coding	regulator of G-protein signaling 6 [Source:MGI Symbol;Acc:MGI:1354730]
ENSMUSG00000007833	238.413	295.627	-0.28734	0.00062046	0.008571	Aldh16a1	protein_coding	aldehyde dehydrogenase 16 family, member A1 [Source:MGI Symbol;Acc:MGI:1916998]
ENSMUSG00000000399	8336.49	9561.78	-0.19161	0.00062126	0.0085733	Ndufa9	protein_coding	NADH dehydrogenase (ubiquinone) 1 alpha subcomplex, 9 [Source:MGI Symbol;Acc:MGI:1913358]
ENSMUSG00000060224	25.4749	13.1118	0.54567	0.00062275	0.0085841	Pyroxd2	protein_coding	pyridine nucleotide-disulphide oxidoreductase domain 2 [Source:MGI Symbol;Acc:MGI:1921830]
ENSMUSG00000004096	711.203	821.543	-0.20163	0.0006238	0.0085841	Cwc15	protein_coding	CWC15 homolog (S. cerevisiae) [Source:MGI Symbol;Acc:MGI:1913320]
ENSMUSG00000020676	60.5431	96.6217	-0.4899	0.00062396	0.0085841	Ccl11	protein_coding	chemokine (C-C motif) ligand 11 [Source:MGI Symbol;Acc:MGI:103576]
ENSMUSG00000091243	65.2762	33.3151	0.5453	0.00062695	0.0086166	Vgll3	protein_coding	vestigial like 3 (Drosophila) [Source:MGI Symbol;Acc:MGI:1920819]
ENSMUSG00000030966	119.886	80.1992	0.45407	0.00062847	0.0086255	Trim21	protein_coding	tripartite motif-containing 21 [Source:MGI Symbol;Acc:MGI:106657]
ENSMUSG00000021368	276.896	336.875	-0.26742	0.00062888	0.0086255	Tbc1d7	protein_coding	TBC1 domain family, member 7 [Source:MGI Symbol;Acc:MGI:1914296]
ENSMUSG00000074781	1330.78	1504.79	-0.17332	0.00063109	0.0086471	Ube2n	protein_coding	ubiquitin-conjugating enzyme E2N [Source:MGI Symbol;Acc:MGI:1934835]
ENSMUSG00000038990	213.965	163.539	0.34375	0.00063295	0.0086638	Cables2	protein_coding	CDK5 and Abl enzyme substrate 2 [Source:MGI Symbol;Acc:MGI:2182335]
ENSMUSG00000037656	2852.87	3295.38	-0.20113	0.00063371	0.0086655	Slc20a2	protein_coding	solute carrier family 20, member 2 [Source:MGI Symbol;Acc:MGI:97851]
ENSMUSG00000038594	81.611	53.3062	0.46847	0.00063541	0.0086791	Cep85l	protein_coding	centrosomal protein 85-like [Source:MGI Symbol;Acc:MGI:3642684]
ENSMUSG00000028062	875.613	1012.33	-0.20244	0.00063985	0.0086791	Lamtor2	protein_coding	late endosomal/lysosomal adaptor, MAPK and MTOR activator 2 [Source:MGI Symbol;Acc:MGI:1932697]
ENSMUSG00000031776	1210.74	1401.71	-0.20483	0.00063934	0.0086791	Arl2bp	protein_coding	ADP-ribosylation factor-like 2 binding protein [Source:MGI Symbol;Acc:MGI:1349429]
ENSMUSG00000016427	4820.31	5753.3	-0.24229	0.00063603	0.0086791	Ndufa1	protein_coding	NADH dehydrogenase (ubiquinone) 1 alpha subcomplex, 1 [Source:MGI Symbol;Acc:MGI:1929511]
ENSMUSG00000028622	1234.93	1484.52	-0.25157	0.00063678	0.0086791	Mrpl37	protein_coding	mitochondrial ribosomal protein L37 [Source:MGI Symbol;Acc:MGI:1926268]
ENSMUSG00000020153	9040.1	11019.2	-0.26761	0.00063926	0.0086791	Ndufs7	protein_coding	NADH dehydrogenase (ubiquinone) Fe-S protein 7 [Source:MGI Symbol;Acc:MGI:1922656]
ENSMUSG00000037095	621.246	800.357	-0.329	0.00063819	0.0086791	Lrg1	protein_coding	leucine-rich alpha-2-glycoprotein 1 [Source:MGI Symbol;Acc:MGI:1924155]
ENSMUSG00000042992	112.363	152.606	-0.38376	0.00063885	0.0086791	Loh12cr1	protein_coding	loss of heterozygosity, 12, chromosomal region 1 homolog (human) [Source:MGI Symbol;Acc:MGI:1915024]
ENSMUSG00000018008	143.286	90.7082	0.48573	0.00064262	0.0087079	Cyth4	protein_coding	cytohesin 4 [Source:MGI Symbol;Acc:MGI:2441702]
ENSMUSG00000054717	275.793	200.773	0.38853	0.00064756	0.0087573	Hmgb2	protein_coding	high mobility group box 2 [Source:MGI Symbol;Acc:MGI:96157]
ENSMUSG00000027170	1248.89	1414.51	-0.17548	0.00064753	0.0087573	Eif3m	protein_coding	eukaryotic translation initiation factor 3, subunit M [Source:MGI Symbol;Acc:MGI:1351744]
ENSMUSG00000021706	249.149	192.348	0.33683	0.00064927	0.0087716	Zfyve16	protein_coding	zinc finger, FYVE domain containing 16 [Source:MGI Symbol;Acc:MGI:2145181]
ENSMUSG00000021662	110.292	144.608	-0.34601	0.00065009	0.0087739	Arhgef28	protein_coding	Rho guanine nucleotide exchange factor (GEF) 28 [Source:MGI Symbol;Acc:MGI:1346016]
ENSMUSG00000032688	140.583	104.234	0.377	0.00065486	0.008777	Malt1	protein_coding	mucosa associated lymphoid tissue lymphoma translocation gene 1 [Source:MGI Symbol;Acc:MGI:2445027]
ENSMUSG00000039167	831.59	684.51	0.26337	0.00065435	0.008777	Eltd1	protein_coding	EGF, latrophilin seven transmembrane domain containing 1 [Source:MGI Symbol;Acc:MGI:2655562]
ENSMUSG00000022235	620.021	715.915	-0.20095	0.00065196	0.008777	Cmbl	protein_coding	carboxymethylenebutenolidase-like (Pseudomonas) [Source:MGI Symbol;Acc:MGI:1916824]
ENSMUSG00000003809	1353.27	1565.23	-0.20243	0.00065421	0.008777	Gcdh	protein_coding	glutaryl-Coenzyme A dehydrogenase [Source:MGI Symbol;Acc:MGI:104541]
ENSMUSG00000001482	1086.14	1260.37	-0.20751	0.00065288	0.008777	Def8	protein_coding	differentially expressed in FDCP 8 [Source:MGI Symbol;Acc:MGI:1346331]
ENSMUSG00000026172	475.217	574.461	-0.25785	0.00065318	0.008777	Bcs1l	protein_coding	BCS1-like (yeast) [Source:MGI Symbol;Acc:MGI:1914071]
ENSMUSG00000026437	281.024	369.048	-0.34933	0.00065166	0.008777	Cdk18	protein_coding	cyclin-dependent kinase 18 [Source:MGI Symbol;Acc:MGI:97518]
ENSMUSG00000067786	59.9967	33.9381	0.52706	0.000657	0.0087969	Nnat	protein_coding	neuronatin [Source:MGI Symbol;Acc:MGI:104716]
ENSMUSG00000026234	3880.52	4284.28	-0.14041	0.00065869	0.0088108	Ncl	protein_coding	nucleolin [Source:MGI Symbol;Acc:MGI:97286]
ENSMUSG00000037138	68.1403	42.6136	0.49017	0.00066078	0.0088177	Aff3	protein_coding	AF4/FMR2 family, member 3 [Source:MGI Symbol;Acc:MGI:106927]
ENSMUSG00000030123	2228.88	1791.79	0.29063	0.00066117	0.0088177	Plxnd1	protein_coding	plexin D1 [Source:MGI Symbol;Acc:MGI:2154244]
ENSMUSG00000040269	832.491	1046.79	-0.30358	0.00066084	0.0088177	Mrps28	protein_coding	mitochondrial ribosomal protein S28 [Source:MGI Symbol;Acc:MGI:1913480]
ENSMUSG00000034932	536.886	644.724	-0.24986	0.00066213	0.0088218	Mrpl54	protein_coding	mitochondrial ribosomal protein L54 [Source:MGI Symbol;Acc:MGI:1913297]
ENSMUSG00000089817	36.9885	20.394	0.53413	0.0006637	0.0088341	Gm7162	pseudogene	predicted gene 7162 [Source:MGI Symbol;Acc:MGI:3645097]
ENSMUSG00000027878	333.802	253.338	0.35395	0.00066494	0.0088362	Notch2	protein_coding	notch 2 [Source:MGI Symbol;Acc:MGI:97364]
ENSMUSG00000021000	849.903	990.217	-0.21165	0.00066544	0.0088362	Ctage5	protein_coding	CTAGE family, member 5 [Source:MGI Symbol;Acc:MGI:1346056]
ENSMUSG00000018286	2276.01	2743.84	-0.25452	0.00066582	0.0088362	Psmb6	protein_coding	proteasome (prosome, macropain) subunit, beta type 6 [Source:MGI Symbol;Acc:MGI:104880]
ENSMUSG00000039410	297.913	225.399	0.35471	0.00066846	0.0088626	Prdm16	protein_coding	PR domain containing 16 [Source:MGI Symbol;Acc:MGI:1917923]
ENSMUSG00000036492	37.4194	20.9051	0.52755	0.00067399	0.0089183	Rnf39	protein_coding	ring finger protein 39 [Source:MGI Symbol;Acc:MGI:2156378]
ENSMUSG00000043131	612.562	519.459	0.22852	0.00067378	0.0089183	Mob1a	protein_coding	MOB kinase activator 1A [Source:MGI Symbol;Acc:MGI:2442631]
ENSMUSG00000022974	214.447	147.343	0.43713	0.00067673	0.0089458	Paxbp1	protein_coding	PAX3 and PAX7 binding protein 1 [Source:MGI Symbol;Acc:MGI:1914617]
ENSMUSG00000025650	16.0874	5.26715	0.51587	0.00068115	0.0089714	Col7a1	protein_coding	collagen, type VII, alpha 1 [Source:MGI Symbol;Acc:MGI:88462]
ENSMUSG00000024897	147.561	108.277	0.38445	0.00067962	0.0089714	Apba1	protein_coding	amyloid beta (A4) precursor protein binding, family A, member 1 [Source:MGI Symbol;Acc:MGI:1860297]
ENSMUSG00000020790	417.763	340.955	0.27396	0.00068151	0.0089714	Ankfy1	protein_coding	ankyrin repeat and FYVE domain containing 1 [Source:MGI Symbol;Acc:MGI:1337008]
ENSMUSG00000063229	12940.3	14986.2	-0.20412	0.00068199	0.0089714	Ldha	protein_coding	lactate dehydrogenase A [Source:MGI Symbol;Acc:MGI:96759]
ENSMUSG00000027742	1192.02	1382.63	-0.20689	0.00068086	0.0089714	Cog6	protein_coding	component of oligomeric golgi complex 6 [Source:MGI Symbol;Acc:MGI:1914792]
ENSMUSG00000047821	112.384	77.1757	0.43651	0.00068475	0.0089742	Trim16	protein_coding	tripartite motif-containing 16 [Source:MGI Symbol;Acc:MGI:2137356]
ENSMUSG00000028820	1551.16	1213.76	0.32101	0.00068619	0.0089742	Sfpq	protein_coding	splicing factor proline/glutamine rich (polypyrimidine tract binding protein associated) [Source:MGI Symbol;Acc:MGI:1918764]
ENSMUSG00000040147	1164.9	1332.35	-0.18723	0.00068315	0.0089742	Maob	protein_coding	monoamine oxidase B [Source:MGI Symbol;Acc:MGI:96916]
ENSMUSG00000087679	939.987	1089.65	-0.20633	0.00068583	0.0089742	C330006A16Rik	lincRNA	RIKEN cDNA C330006A16 gene [Source:MGI Symbol;Acc:MGI:1924939]
ENSMUSG00000086863	375.677	467.87	-0.29195	0.00068589	0.0089742	Gm15543	antisense	predicted gene 15543 [Source:MGI Symbol;Acc:MGI:3782992]
ENSMUSG00000020649	28.4414	51.4849	-0.53048	0.00068573	0.0089742	Rrm2	protein_coding	ribonucleotide reductase M2 [Source:MGI Symbol;Acc:MGI:98181]
ENSMUSG00000085180	25.6591	11.2915	0.54522	0.00069049	0.0090217	AI838599	lincRNA	expressed sequence AI838599 [Source:MGI Symbol;Acc:MGI:3510989]
ENSMUSG00000033022	314.673	87.9762	0.49126	0.00069231	0.0090289	Cdo1	protein_coding	cysteine dioxygenase 1, cytosolic [Source:MGI Symbol;Acc:MGI:105925]
ENSMUSG00000020843	489.886	582.208	-0.23696	0.00069237	0.0090289	Timm22	protein_coding	translocase of inner mitochondrial membrane 22 [Source:MGI Symbol;Acc:MGI:1929742]
ENSMUSG00000025656	240.326	293.408	-0.27065	0.00069419	0.0090439	Arhgef9	protein_coding	CDC42 guanine nucleotide exchange factor (GEF) 9 [Source:MGI Symbol;Acc:MGI:2442233]
ENSMUSG00000030246	26617.2	31137.3	-0.21699	0.00069568	0.0090546	Ldhb	protein_coding	lactate dehydrogenase B [Source:MGI Symbol;Acc:MGI:96763]
ENSMUSG00000026944	749.814	873.84	-0.21189	0.00069937	0.0090938	Abca2	protein_coding	ATP-binding cassette, sub-family A (ABC1), member 2 [Source:MGI Symbol;Acc:MGI:99606]
ENSMUSG00000029335	12.7876	26.4988	-0.54466	0.0007054	0.0091634	Bmp3	protein_coding	bone morphogenetic protein 3 [Source:MGI Symbol;Acc:MGI:88179]
ENSMUSG00000041733	1900.59	2128.01	-0.15971	0.00070734	0.0091798	Coq5	protein_coding	coenzyme Q5 homolog, methyltransferase (yeast) [Source:MGI Symbol;Acc:MGI:1098643]
ENSMUSG00000021413	555.874	423.302	0.34965	0.00070809	0.0091807	Prpf4b	protein_coding	PRP4 pre-mRNA processing factor 4 homolog B (yeast) [Source:MGI Symbol;Acc:MGI:109584]
ENSMUSG00000029632	14203.4	16265.1	-0.18943	0.00070882	0.0091813	Ndufa4	protein_coding	NADH dehydrogenase (ubiquinone) 1 alpha subcomplex, 4 [Source:MGI Symbol;Acc:MGI:107686]
ENSMUSG00000030138	475.266	403.617	0.22603	0.00071025	0.009187	Bms1	protein_coding	BMS1 homolog, ribosome assembly protein (yeast) [Source:MGI Symbol;Acc:MGI:2446132]
ENSMUSG00000066279	39.5416	63.264	-0.48696	0.00071062	0.009187	Chrna10	protein_coding	cholinergic receptor, nicotinic, alpha polypeptide 10 [Source:MGI Symbol;Acc:MGI:3609260]
ENSMUSG00000030224	2194.55	2461.56	-0.16203	0.00071205	0.0091967	Strap	protein_coding	serine/threonine kinase receptor associated protein [Source:MGI Symbol;Acc:MGI:1329037]
ENSMUSG00000057229	537.277	640.083	-0.24052	0.00071374	0.0092098	Atp5sl	protein_coding	ATP5S-like [Source:MGI Symbol;Acc:MGI:1913599]
ENSMUSG00000024410	371.34	444.574	-0.24616	0.00071698	0.0092427	3110002H16Rik	protein_coding	RIKEN cDNA 3110002H16 gene [Source:MGI Symbol;Acc:MGI:1916528]
ENSMUSG00000028156	2161.38	2500.82	-0.20342	0.00072009	0.0092621	Eif4e	protein_coding	eukaryotic translation initiation factor 4E [Source:MGI Symbol;Acc:MGI:95305]
ENSMUSG00000037003	2244.31	2682.3	-0.24375	0.00072054	0.0092621	Tenc1	protein_coding	tensin like C1 domain-containing phosphatase [Source:MGI Symbol;Acc:MGI:2387586]
ENSMUSG00000078532	93.4075	145.192	-0.47463	0.00071937	0.0092621	Nkain1	protein_coding	Na+/K+ transporting ATPase interacting 1 [Source:MGI Symbol;Acc:MGI:1914399]
ENSMUSG00000032702	1120.21	966.027	0.2063	0.00072175	0.0092688	Kank1	protein_coding	KN motif and ankyrin repeat domains 1 [Source:MGI Symbol;Acc:MGI:2147707]
ENSMUSG00000037876	641.031	531.154	0.25478	0.00072531	0.0093057	Jmjd1c	protein_coding	jumonji domain containing 1C [Source:MGI Symbol;Acc:MGI:1918614]
ENSMUSG00000022450	3856.76	4619.41	-0.24622	0.00072789	0.0093212	Ndufa6	protein_coding	NADH dehydrogenase (ubiquinone) 1 alpha subcomplex, 6 (B14) [Source:MGI Symbol;Acc:MGI:1914380]
ENSMUSG00000074797	391.757	474.028	-0.26067	0.00072768	0.0093212	Itpa	protein_coding	inosine triphosphatase (nucleoside triphosphate pyrophosphatase) [Source:MGI Symbol;Acc:MGI:96622]
ENSMUSG00000085028	50.3057	27.5766	0.53125	0.00073402	0.0093907	Slc2a4rg-ps	pseudogene	Slc2a4 regulator, pseudogene [Source:MGI Symbol;Acc:MGI:3651388]
ENSMUSG00000031328	2255.19	1848.62	0.2687	0.00073936	0.0094501	Flna	protein_coding	filamin, alpha [Source:MGI Symbol;Acc:MGI:95556]
ENSMUSG00000025525	738.796	863.709	-0.21605	0.00074948	0.0095704	Apool	protein_coding	apolipoprotein O-like [Source:MGI Symbol;Acc:MGI:1915367]
ENSMUSG00000073616	898.64	1049.33	-0.21484	0.00075361	0.0096141	Myeov2	protein_coding	myeloma overexpressed 2 [Source:MGI Symbol;Acc:MGI:1914165]
ENSMUSG00000029148	1148.32	1315.44	-0.19046	0.00075696	0.0096477	Nrbp1	protein_coding	nuclear receptor binding protein 1 [Source:MGI Symbol;Acc:MGI:2183436]
ENSMUSG00000042254	106.748	75.6178	0.41102	0.0007578	0.0096493	Cilp	protein_coding	cartilage intermediate layer protein, nucleotide pyrophosphohydrolase [Source:MGI Symbol;Acc:MGI:2444507]
ENSMUSG00000037965	441.635	341.29	0.33509	0.00076216	0.0096692	Zc3h7a	protein_coding	zinc finger CCCH type containing 7 A [Source:MGI Symbol;Acc:MGI:2445044]
ENSMUSG00000066551	3303.85	3629.24	-0.13397	0.00076176	0.0096692	Hmgb1	protein_coding	high mobility group box 1 [Source:MGI Symbol;Acc:MGI:96113]
ENSMUSG00000022214	1999.56	2241.1	-0.16099	0.00076115	0.0096692	Dcaf11	protein_coding	DDB1 and CUL4 associated factor 11 [Source:MGI Symbol;Acc:MGI:90168]
ENSMUSG00000004748	3019.73	3543.24	-0.22091	0.00076223	0.0096692	Mtfp1	protein_coding	mitochondrial fission process 1 [Source:MGI Symbol;Acc:MGI:1916686]
ENSMUSG00000031490	1569.67	1904.11	-0.2617	0.00076435	0.0096871	Eif4ebp1	protein_coding	eukaryotic translation initiation factor 4E binding protein 1 [Source:MGI Symbol;Acc:MGI:103267]
ENSMUSG00000041189	89.8624	61.999	0.42859	0.00077722	0.0098203	Chrnb1	protein_coding	cholinergic receptor, nicotinic, beta polypeptide 1 (muscle) [Source:MGI Symbol;Acc:MGI:87890]
ENSMUSG00000032217	341.058	270.675	0.30515	0.00077915	0.0098203	Rnf111	protein_coding	ring finger 111 [Source:MGI Symbol;Acc:MGI:1934919]
ENSMUSG00000020994	734.031	585.43	0.30094	0.00077736	0.0098203	Pnn	protein_coding	pinin [Source:MGI Symbol;Acc:MGI:1100514]
ENSMUSG00000003746	704.756	567.531	0.28858	0.00077749	0.0098203	Man1a	protein_coding	mannosidase 1, alpha [Source:MGI Symbol;Acc:MGI:104677]
ENSMUSG00000029454	1017.45	1155.54	-0.17878	0.00077826	0.0098203	Mapkapk5	protein_coding	MAP kinase-activated protein kinase 5 [Source:MGI Symbol;Acc:MGI:1333110]
ENSMUSG00000000088	2966.89	3584.37	-0.25661	0.00077923	0.0098203	Cox5a	protein_coding	cytochrome c oxidase subunit Va [Source:MGI Symbol;Acc:MGI:88474]
ENSMUSG00000027803	1230.43	1056.17	0.21157	0.00079195	0.0099714	Wwtr1	protein_coding	WW domain containing transcription regulator 1 [Source:MGI Symbol;Acc:MGI:1917649]
ENSMUSG00000002395	1247.47	1445.81	-0.20495	0.00079995	0.010063	Use1	protein_coding	unconventional SNARE in the ER 1 homolog (S. cerevisiae) [Source:MGI Symbol;Acc:MGI:1914273]
ENSMUSG00000020219	1207.87	1513.15	-0.29819	0.00080301	0.010092	Timm13	protein_coding	translocase of inner mitochondrial membrane 13 [Source:MGI Symbol;Acc:MGI:1353432]
ENSMUSG00000022635	807.23	923.496	-0.18704	0.00080758	0.010135	Zcrb1	protein_coding	zinc finger CCHC-type and RNA binding motif 1 [Source:MGI Symbol;Acc:MGI:1914447]
ENSMUSG00000038633	703.263	829.439	-0.22528	0.00080791	0.010135	Degs1	protein_coding	degenerative spermatocyte homolog 1 (Drosophila) [Source:MGI Symbol;Acc:MGI:1097711]
ENSMUSG00000005533	122.654	85.8022	0.41819	0.00081212	0.01016	Igf1r	protein_coding	insulin-like growth factor I receptor [Source:MGI Symbol;Acc:MGI:96433]
ENSMUSG00000086605	185.451	139.547	0.35907	0.00081212	0.01016	Gm14290	lincRNA	predicted gene 14290 [Source:MGI Symbol;Acc:MGI:3649702]
ENSMUSG00000035953	306.058	366.885	-0.24854	0.00081222	0.01016	Tmem55b	protein_coding	transmembrane protein 55b [Source:MGI Symbol;Acc:MGI:2448501]
ENSMUSG00000046201	585.899	499.999	0.21896	0.00081429	0.010177	Scaf8	protein_coding	SR-related CTD-associated factor 8 [Source:MGI Symbol;Acc:MGI:1925212]
ENSMUSG00000020340	2217.74	2756.92	-0.28955	0.00081511	0.010178	Cyfip2	protein_coding	cytoplasmic FMR1 interacting protein 2 [Source:MGI Symbol;Acc:MGI:1924134]
ENSMUSG00000001334	5387.6	6218.53	-0.19956	0.00081992	0.010228	Fndc5	protein_coding	fibronectin type III domain containing 5 [Source:MGI Symbol;Acc:MGI:1917614]
ENSMUSG00000019782	823.334	958.734	-0.21034	0.00082413	0.010271	Rwdd1	protein_coding	RWD domain containing 1 [Source:MGI Symbol;Acc:MGI:1913771]
ENSMUSG00000072964	357.047	434.23	-0.26614	0.00082616	0.010287	Bhlhb9	protein_coding	basic helix-loop-helix domain containing, class B9 [Source:MGI Symbol;Acc:MGI:1917487]
ENSMUSG00000034957	391.605	254.07	0.4675	0.00082814	0.010302	Cebpa	protein_coding	CCAAT/enhancer binding protein (C/EBP), alpha [Source:MGI Symbol;Acc:MGI:99480]
ENSMUSG00000024002	727.028	631.57	0.1974	0.0008299	0.010315	Brd4	protein_coding	bromodomain containing 4 [Source:MGI Symbol;Acc:MGI:1888520]
ENSMUSG00000073434	44.3678	24.5147	0.52597	0.00083435	0.010349	Wdr90	protein_coding	WD repeat domain 90 [Source:MGI Symbol;Acc:MGI:1921267]
ENSMUSG00000036412	18.5445	6.40234	0.51414	0.00083374	0.010349	Arsi	protein_coding	arylsulfatase i [Source:MGI Symbol;Acc:MGI:2670959]
ENSMUSG00000061288	160.789	116.995	0.39124	0.00083633	0.010349	Taok3	protein_coding	TAO kinase 3 [Source:MGI Symbol;Acc:MGI:3041177]
ENSMUSG00000026365	2904.93	2400.44	0.25842	0.00083649	0.010349	Cfh	protein_coding	complement component factor h [Source:MGI Symbol;Acc:MGI:88385]
ENSMUSG00000015112	2049.14	2425.31	-0.23163	0.00083526	0.010349	Slc25a13	protein_coding	solute carrier family 25 (mitochondrial carrier, adenine nucleotide translocator), member 13 [Source:MGI Symbol;Acc:MGI:1354721]
ENSMUSG00000033918	680.969	794.138	-0.21448	0.00083797	0.010358	Parl	protein_coding	presenilin associated, rhomboid-like [Source:MGI Symbol;Acc:MGI:1277152]
ENSMUSG00000047793	117.576	69.4379	0.50795	0.00084292	0.010409	Sned1	protein_coding	sushi, nidogen and EGF-like domains 1 [Source:MGI Symbol;Acc:MGI:3045960]
ENSMUSG00000018574	8711.27	10079.4	-0.20279	0.00084548	0.010431	Acadvl	protein_coding	acyl-Coenzyme A dehydrogenase, very long chain [Source:MGI Symbol;Acc:MGI:895149]
ENSMUSG00000089788	49.3811	27.6053	0.52232	0.00085302	0.010515	Gm16586	antisense	predicted gene 16586 [Source:MGI Symbol;Acc:MGI:4415006]
ENSMUSG00000018770	22820.6	26979.6	-0.22992	0.00085491	0.010524	Atp5g3	protein_coding	ATP synthase, H+ transporting, mitochondrial F0 complex, subunit C3 (subunit 9) [Source:MGI Symbol;Acc:MGI:2442035]
ENSMUSG00000039910	826.826	1151.63	-0.39951	0.0008553	0.010524	Cited2	protein_coding	Cbp/p300-interacting transactivator, with Glu/Asp-rich carboxy-terminal domain, 2 [Source:MGI Symbol;Acc:MGI:1306784]
ENSMUSG00000024219	1476.74	1177.18	0.30001	0.00085691	0.010527	Anks1	protein_coding	ankyrin repeat and SAM domain containing 1 [Source:MGI Symbol;Acc:MGI:2446180]
ENSMUSG00000018287	1463.88	1712.49	-0.21691	0.00085716	0.010527	Spag7	protein_coding	sperm associated antigen 7 [Source:MGI Symbol;Acc:MGI:107380]
ENSMUSG00000044502	1886.78	2115.08	-0.16149	0.00086327	0.010593	Bod1	protein_coding	biorientation of chromosomes in cell division 1 [Source:MGI Symbol;Acc:MGI:1916806]
ENSMUSG00000025478	97.2396	132.878	-0.3853	0.00086513	0.010606	Dpysl4	protein_coding	dihydropyrimidinase-like 4 [Source:MGI Symbol;Acc:MGI:1349764]
ENSMUSG00000020456	30415.1	34505.7	-0.17695	0.00086986	0.010654	Ogdh	protein_coding	oxoglutarate (alpha-ketoglutarate) dehydrogenase (lipoamide) [Source:MGI Symbol;Acc:MGI:1098267]
ENSMUSG00000034442	496.683	618.477	-0.28994	0.00087066	0.010655	Trmt5	protein_coding	TRM5 tRNA methyltransferase 5 [Source:MGI Symbol;Acc:MGI:1923607]
ENSMUSG00000028744	75.8688	106.093	-0.40395	0.00087569	0.010706	Pqlc2	protein_coding	PQ loop repeat containing 2 [Source:MGI Symbol;Acc:MGI:2384837]
ENSMUSG00000020664	8366.8	9370.03	-0.15978	0.00087707	0.010709	Dld	protein_coding	dihydrolipoamide dehydrogenase [Source:MGI Symbol;Acc:MGI:107450]
ENSMUSG00000025381	559.22	682.595	-0.26889	0.00087746	0.010709	Cnpy2	protein_coding	canopy 2 homolog (zebrafish) [Source:MGI Symbol;Acc:MGI:1928477]
ENSMUSG00000035606	230.187	338.909	-0.43973	0.00087923	0.010721	Ky	protein_coding	kyphoscoliosis peptidase [Source:MGI Symbol;Acc:MGI:96709]
ENSMUSG00000053964	962.118	536.176	0.52056	0.00088271	0.010753	Lgals4	protein_coding	lectin, galactose binding, soluble 4 [Source:MGI Symbol;Acc:MGI:107536]
ENSMUSG00000054455	2318.39	2560.31	-0.14106	0.00088451	0.010766	Vapb	protein_coding	vesicle-associated membrane protein, associated protein B and C [Source:MGI Symbol;Acc:MGI:1928744]
ENSMUSG00000039087	629.34	528.225	0.239	0.00088785	0.010788	Rreb1	protein_coding	ras responsive element binding protein 1 [Source:MGI Symbol;Acc:MGI:2443664]
ENSMUSG00000052712	2943.91	3284.32	-0.15472	0.00088823	0.010788	BC004004	protein_coding	cDNA sequence BC004004 [Source:MGI Symbol;Acc:MGI:2136782]
ENSMUSG00000019945	324.218	396.563	-0.26967	0.00088876	0.010788	1700040L02Rik	protein_coding	RIKEN cDNA 1700040L02 gene [Source:MGI Symbol;Acc:MGI:1920537]
ENSMUSG00000018401	394.743	311.096	0.31362	0.00089149	0.010805	Mtmr4	protein_coding	myotubularin related protein 4 [Source:MGI Symbol;Acc:MGI:2180699]
ENSMUSG00000049751	1683.42	1948.24	-0.20299	0.00089172	0.010805	Rpl36al	protein_coding	ribosomal protein L36A-like [Source:MGI Symbol;Acc:MGI:1913733]
ENSMUSG00000022894	445.315	333.01	0.36137	0.00089572	0.010834	Adamts5	protein_coding	a disintegrin-like and metallopeptidase (reprolysin type) with thrombospondin type 1 motif, 5 (aggrecanase-2) [Source:MGI Symbol;Acc:MGI:1346321]
ENSMUSG00000027722	151.436	113.875	0.35557	0.00089502	0.010834	Spata5	protein_coding	spermatogenesis associated 5 [Source:MGI Symbol;Acc:MGI:1927170]
ENSMUSG00000021287	67.8793	41.3067	0.4961	0.00089726	0.010843	Xrcc3	protein_coding	X-ray repair complementing defective repair in Chinese hamster cells 3 [Source:MGI Symbol;Acc:MGI:1921585]
ENSMUSG00000059005	3413.24	3062.02	0.15384	0.00090356	0.010899	Hnrnpa3	protein_coding	heterogeneous nuclear ribonucleoprotein A3 [Source:MGI Symbol;Acc:MGI:1917171]
ENSMUSG00000013858	2408.36	2813.82	-0.21521	0.00090279	0.010899	Tmem259	protein_coding	transmembrane protein 259 [Source:MGI Symbol;Acc:MGI:2177957]
ENSMUSG00000003464	2235.48	2527.08	-0.17271	0.0009047	0.010903	Pex19	protein_coding	peroxisomal biogenesis factor 19 [Source:MGI Symbol;Acc:MGI:1334458]
ENSMUSG00000061589	669.001	543.733	0.27895	0.00090879	0.010943	Dot1l	protein_coding	DOT1-like, histone H3 methyltransferase (S. cerevisiae) [Source:MGI Symbol;Acc:MGI:2143886]
ENSMUSG00000030921	171.522	124.522	0.39002	0.00091393	0.010995	Trim30a	protein_coding	tripartite motif-containing 30A [Source:MGI Symbol;Acc:MGI:98178]
ENSMUSG00000026872	503.639	396.673	0.31067	0.00091756	0.011029	Zeb2	protein_coding	zinc finger E-box binding homeobox 2 [Source:MGI Symbol;Acc:MGI:1344407]
ENSMUSG00000028383	4133.5	4730.46	-0.18866	0.00091849	0.01103	Hsdl2	protein_coding	hydroxysteroid dehydrogenase like 2 [Source:MGI Symbol;Acc:MGI:1919729]
ENSMUSG00000030002	754.609	566.041	0.36143	0.00091974	0.011035	Dusp11	protein_coding	dual specificity phosphatase 11 (RNA/RNP complex 1-interacting) [Source:MGI Symbol;Acc:MGI:1919352]
ENSMUSG00000037949	833.42	1063.39	-0.31735	0.0009208	0.011038	Ano10	protein_coding	anoctamin 10 [Source:MGI Symbol;Acc:MGI:2143103]
ENSMUSG00000006362	381	316.383	0.25394	0.00092501	0.011079	Cbfa2t3	protein_coding	core-binding factor, runt domain, alpha subunit 2, translocated to, 3 (human) [Source:MGI Symbol;Acc:MGI:1338013]
ENSMUSG00000001998	115.194	80.5372	0.42282	0.00092958	0.011124	Ap4e1	protein_coding	adaptor-related protein complex AP-4, epsilon 1 [Source:MGI Symbol;Acc:MGI:1336993]
ENSMUSG00000024471	1169.68	900.336	0.33596	0.0009328	0.01115	Myot	protein_coding	myotilin [Source:MGI Symbol;Acc:MGI:1889800]
ENSMUSG00000101941	16.8512	32.1679	-0.52768	0.00093344	0.01115	RP23-464K22.1	lincRNA	predicted gene 28979 [Source:MGI Symbol;Acc:MGI:5579685]
ENSMUSG00000044788	115.137	80.8675	0.41221	0.00093693	0.011182	Fads6	protein_coding	fatty acid desaturase domain family, member 6 [Source:MGI Symbol;Acc:MGI:3039592]
ENSMUSG00000044533	12106.1	13947.4	-0.19706	0.00093967	0.011205	Rps2	protein_coding	ribosomal protein S2 [Source:MGI Symbol;Acc:MGI:105110]
ENSMUSG00000024013	61.4545	32.7537	0.52582	0.00094355	0.01123	Fgd2	protein_coding	FYVE, RhoGEF and PH domain containing 2 [Source:MGI Symbol;Acc:MGI:1347084]
ENSMUSG00000035164	111.635	74.202	0.45107	0.00094593	0.01123	Zc3h12c	protein_coding	zinc finger CCCH type containing 12C [Source:MGI Symbol;Acc:MGI:3026959]
ENSMUSG00000050608	4707.96	5381.19	-0.18669	0.00094481	0.01123	Minos1	protein_coding	mitochondrial inner membrane organizing system 1 [Source:MGI Symbol;Acc:MGI:1913628]
ENSMUSG00000059534	6904.68	8145.32	-0.22706	0.0009442	0.01123	Uqcr10	protein_coding	ubiquinol-cytochrome c reductase, complex III subunit X [Source:MGI Symbol;Acc:MGI:1913402]
ENSMUSG00000053279	457.348	576.886	-0.30422	0.00094598	0.01123	Aldh1a1	protein_coding	aldehyde dehydrogenase family 1, subfamily A1 [Source:MGI Symbol;Acc:MGI:1353450]
ENSMUSG00000027750	635.996	544.004	0.21579	0.00094858	0.011242	Postn	protein_coding	periostin, osteoblast specific factor [Source:MGI Symbol;Acc:MGI:1926321]
ENSMUSG00000030842	1413.2	1642.03	-0.20835	0.00094811	0.011242	Lamtor1	protein_coding	late endosomal/lysosomal adaptor, MAPK and MTOR activator 1 [Source:MGI Symbol;Acc:MGI:1913758]
ENSMUSG00000091537	1684.88	2024.72	-0.24943	0.00095074	0.011257	Tma7	protein_coding	translational machinery associated 7 homolog (S. cerevisiae) [Source:MGI Symbol;Acc:MGI:1913417]
ENSMUSG00000021367	78.6101	51.8344	0.45565	0.0009557	0.011286	Edn1	protein_coding	endothelin 1 [Source:MGI Symbol;Acc:MGI:95283]
ENSMUSG00000021457	505.734	421.282	0.25039	0.00095498	0.011286	Syk	protein_coding	spleen tyrosine kinase [Source:MGI Symbol;Acc:MGI:99515]
ENSMUSG00000030335	2238.71	2545	-0.17956	0.00095421	0.011286	Mrpl51	protein_coding	mitochondrial ribosomal protein L51 [Source:MGI Symbol;Acc:MGI:1913743]
ENSMUSG00000035242	13391.4	16131.5	-0.25253	0.00095832	0.011307	Oaz1	protein_coding	ornithine decarboxylase antizyme 1 [Source:MGI Symbol;Acc:MGI:109433]
ENSMUSG00000037461	183.225	139.81	0.34632	0.00096931	0.011412	Ints7	protein_coding	integrator complex subunit 7 [Source:MGI Symbol;Acc:MGI:1924315]
ENSMUSG00000071757	536.959	431.071	0.29131	0.00096808	0.011412	Zhx2	protein_coding	zinc fingers and homeoboxes 2 [Source:MGI Symbol;Acc:MGI:2683087]
ENSMUSG00000054733	630.172	744.239	-0.22908	0.00096974	0.011412	Msra	protein_coding	methionine sulfoxide reductase A [Source:MGI Symbol;Acc:MGI:106916]
ENSMUSG00000032355	1394.9	1614.38	-0.20296	0.00097068	0.011413	Mlip	protein_coding	muscular LMNA-interacting protein [Source:MGI Symbol;Acc:MGI:1916892]
ENSMUSG00000006715	817.922	1009.21	-0.27992	0.00097381	0.01144	Gmnn	protein_coding	geminin [Source:MGI Symbol;Acc:MGI:1927344]
ENSMUSG00000030403	831.505	669.784	0.28618	0.00097627	0.011459	Vasp	protein_coding	vasodilator-stimulated phosphoprotein [Source:MGI Symbol;Acc:MGI:109268]
ENSMUSG00000090086	222.738	107.275	0.53056	0.00098675	0.011572	AI480526	lincRNA	expressed sequence AI480526 [Source:MGI Symbol;Acc:MGI:2140910]
ENSMUSG00000003814	4809.69	4312.46	0.15422	0.00099133	0.011616	Calr	protein_coding	calreticulin [Source:MGI Symbol;Acc:MGI:88252]
ENSMUSG00000003559	803.164	915.879	-0.18339	0.00099359	0.011622	As3mt	protein_coding	arsenic (+3 oxidation state) methyltransferase [Source:MGI Symbol;Acc:MGI:1929882]
ENSMUSG00000030603	1058.59	1234.86	-0.21246	0.00099275	0.011622	Psmc4	protein_coding	proteasome (prosome, macropain) 26S subunit, ATPase, 4 [Source:MGI Symbol;Acc:MGI:1346093]
ENSMUSG00000020521	419.352	340.509	0.27877	0.00099465	0.011624	Rnft1	protein_coding	ring finger protein, transmembrane 1 [Source:MGI Symbol;Acc:MGI:1924142]
ENSMUSG00000022197	1329.07	1059.49	0.29972	0.00099838	0.011638	Pdzd2	protein_coding	PDZ domain containing 2 [Source:MGI Symbol;Acc:MGI:1922394]
ENSMUSG00000041577	941.326	759.336	0.28522	0.00099927	0.011638	Prelp	protein_coding	proline arginine-rich end leucine-rich repeat [Source:MGI Symbol;Acc:MGI:2151110]
ENSMUSG00000005881	1115.87	1306.57	-0.21789	0.00099818	0.011638	Ergic3	protein_coding	ERGIC and golgi 3 [Source:MGI Symbol;Acc:MGI:1913616]
ENSMUSG00000036860	894.905	1051.73	-0.2229	0.00099811	0.011638	Mrpl55	protein_coding	mitochondrial ribosomal protein L55 [Source:MGI Symbol;Acc:MGI:1914462]
ENSMUSG00000011179	1376.02	1200.32	0.19	0.0010027	0.011668	Odc1	protein_coding	ornithine decarboxylase, structural 1 [Source:MGI Symbol;Acc:MGI:97402]
ENSMUSG00000033307	865.415	1070.45	-0.2827	0.0010043	0.011671	Mif	protein_coding	macrophage migration inhibitory factor [Source:MGI Symbol;Acc:MGI:96982]
ENSMUSG00000028545	131.054	177.437	-0.37543	0.0010047	0.011671	Bend5	protein_coding	BEN domain containing 5 [Source:MGI Symbol;Acc:MGI:1914871]
ENSMUSG00000027010	3738.68	4243.51	-0.17769	0.0010062	0.011678	Slc25a12	protein_coding	solute carrier family 25 (mitochondrial carrier, Aralar), member 12 [Source:MGI Symbol;Acc:MGI:1926080]
ENSMUSG00000002980	4741.45	5717.53	-0.25363	0.0010101	0.011714	Bcam	protein_coding	basal cell adhesion molecule [Source:MGI Symbol;Acc:MGI:1929940]
ENSMUSG00000032435	958.673	820.926	0.21415	0.0010118	0.011723	Dync1li1	protein_coding	dynein cytoplasmic 1 light intermediate chain 1 [Source:MGI Symbol;Acc:MGI:2135610]
ENSMUSG00000001018	1049.43	1190.73	-0.17795	0.0010154	0.011755	Snapin	protein_coding	SNAP-associated protein [Source:MGI Symbol;Acc:MGI:1333745]
ENSMUSG00000022878	235.626	49.2175	0.43155	0.0010209	0.011792	Adipoq	protein_coding	adiponectin, C1Q and collagen domain containing [Source:MGI Symbol;Acc:MGI:106675]
ENSMUSG00000031616	845.235	615.815	0.38558	0.0010212	0.011792	Ednra	protein_coding	endothelin receptor type A [Source:MGI Symbol;Acc:MGI:105923]
ENSMUSG00000044573	531.687	616.987	-0.20699	0.0010195	0.011792	Acp1	protein_coding	acid phosphatase 1, soluble [Source:MGI Symbol;Acc:MGI:87881]
ENSMUSG00000015016	519.485	626.634	-0.25459	0.001023	0.011802	Acsf3	protein_coding	acyl-CoA synthetase family member 3 [Source:MGI Symbol;Acc:MGI:2182591]
ENSMUSG00000013701	2556.69	2871.75	-0.16374	0.0010252	0.011818	Timm23	protein_coding	translocase of inner mitochondrial membrane 23 [Source:MGI Symbol;Acc:MGI:1858317]
ENSMUSG00000032116	677.004	578.134	0.21805	0.0010298	0.011861	Stt3a	protein_coding	STT3, subunit of the oligosaccharyltransferase complex, homolog A (S. cerevisiae) [Source:MGI Symbol;Acc:MGI:105124]
ENSMUSG00000035357	487.823	397.46	0.27254	0.0010343	0.011903	Pdzrn3	protein_coding	PDZ domain containing RING finger 3 [Source:MGI Symbol;Acc:MGI:1933157]
ENSMUSG00000071337	312.535	227.157	0.38842	0.001036	0.011912	Tia1	protein_coding	cytotoxic granule-associated RNA binding protein 1 [Source:MGI Symbol;Acc:MGI:107914]
ENSMUSG00000055204	1222.23	1015.69	0.25165	0.0010402	0.011939	Ankrd17	protein_coding	ankyrin repeat domain 17 [Source:MGI Symbol;Acc:MGI:1932101]
ENSMUSG00000060860	944.263	1154.74	-0.27004	0.0010393	0.011939	Ube2s	protein_coding	ubiquitin-conjugating enzyme E2S [Source:MGI Symbol;Acc:MGI:1925141]
ENSMUSG00000022148	34.6147	17.7417	0.52551	0.001044	0.011963	Fyb	protein_coding	FYN binding protein [Source:MGI Symbol;Acc:MGI:1346327]
ENSMUSG00000087006	150.314	104.764	0.41854	0.0010435	0.011963	Gm13889	protein_coding	predicted gene 13889 [Source:MGI Symbol;Acc:MGI:3652053]
ENSMUSG00000029068	1046.26	741.399	0.40734	0.0010482	0.012001	Ccnl2	protein_coding	cyclin L2 [Source:MGI Symbol;Acc:MGI:1927119]
ENSMUSG00000034037	577.224	468.433	0.27968	0.0010514	0.012019	Fgd5	protein_coding	FYVE, RhoGEF and PH domain containing 5 [Source:MGI Symbol;Acc:MGI:2443369]
ENSMUSG00000026837	608.582	511.222	0.23718	0.0010521	0.012019	Col5a1	protein_coding	collagen, type V, alpha 1 [Source:MGI Symbol;Acc:MGI:88457]
ENSMUSG00000038412	2078.51	2404.65	-0.20233	0.0010524	0.012019	Higd1a	protein_coding	HIG1 domain family, member 1A [Source:MGI Symbol;Acc:MGI:1930666]
ENSMUSG00000101970	46.7994	23.6473	0.52602	0.0010611	0.012108	RP23-32A8.1	processed_transcript	-
ENSMUSG00000024767	775.296	922.234	-0.23806	0.0010637	0.012127	Otub1	protein_coding	OTU domain, ubiquitin aldehyde binding 1 [Source:MGI Symbol;Acc:MGI:2147616]
ENSMUSG00000027397	230.665	163.179	0.41025	0.0010682	0.012158	Slc20a1	protein_coding	solute carrier family 20, member 1 [Source:MGI Symbol;Acc:MGI:108392]
ENSMUSG00000040565	280.2	204.115	0.38661	0.0010673	0.012158	Btaf1	protein_coding	BTAF1 RNA polymerase II, B-TFIID transcription factor-associated, (Mot1 homolog, S. cerevisiae) [Source:MGI Symbol;Acc:MGI:2147538]
ENSMUSG00000036661	231.738	162.19	0.4178	0.0010742	0.012209	Dennd3	protein_coding	DENN/MADD domain containing 3 [Source:MGI Symbol;Acc:MGI:2146009]
ENSMUSG00000021546	3779.1	4130.98	-0.12691	0.0010745	0.012209	Hnrnpk	protein_coding	heterogeneous nuclear ribonucleoprotein K [Source:MGI Symbol;Acc:MGI:99894]
ENSMUSG00000001642	3092.42	3689.34	-0.24064	0.0010776	0.012231	Akr1b3	protein_coding	aldo-keto reductase family 1, member B3 (aldose reductase) [Source:MGI Symbol;Acc:MGI:1353494]
ENSMUSG00000028651	187.468	235.831	-0.30378	0.0010782	0.012231	Ppie	protein_coding	peptidylprolyl isomerase E (cyclophilin E) [Source:MGI Symbol;Acc:MGI:1917118]
ENSMUSG00000027999	589.798	701.366	-0.23711	0.0010799	0.01224	Pla2g12a	protein_coding	phospholipase A2, group XIIA [Source:MGI Symbol;Acc:MGI:1913600]
ENSMUSG00000030611	271.032	336.705	-0.2878	0.0010837	0.012272	Mrps11	protein_coding	mitochondrial ribosomal protein S11 [Source:MGI Symbol;Acc:MGI:1915244]
ENSMUSG00000036835	853.074	983.002	-0.19789	0.0010866	0.012295	Psenen	protein_coding	presenilin enhancer 2 homolog (C. elegans) [Source:MGI Symbol;Acc:MGI:1913590]
ENSMUSG00000032252	235.609	186.973	0.30238	0.0010922	0.012328	Glce	protein_coding	glucuronyl C5-epimerase [Source:MGI Symbol;Acc:MGI:2136405]
ENSMUSG00000039968	397.658	324.817	0.27136	0.0010912	0.012328	Rsbn1l	protein_coding	round spermatid basic protein 1-like [Source:MGI Symbol;Acc:MGI:3036237]
ENSMUSG00000018821	134.823	188.545	-0.40014	0.0010923	0.012328	Avpi1	protein_coding	arginine vasopressin-induced 1 [Source:MGI Symbol;Acc:MGI:1916784]
ENSMUSG00000025491	28.2287	47.5947	-0.49668	0.0010941	0.012338	Ifitm1	protein_coding	interferon induced transmembrane protein 1 [Source:MGI Symbol;Acc:MGI:1915963]
ENSMUSG00000035697	143.874	90.6694	0.4762	0.0010961	0.01234	Hmha1	protein_coding	histocompatibility (minor) HA-1 [Source:MGI Symbol;Acc:MGI:1917969]
ENSMUSG00000020572	4043.06	4937.36	-0.26808	0.0010967	0.01234	Nampt	protein_coding	nicotinamide phosphoribosyltransferase [Source:MGI Symbol;Acc:MGI:1929865]
ENSMUSG00000043644	110.281	151.445	-0.38406	0.0010969	0.01234	0610009L18Rik	protein_coding	RIKEN cDNA 0610009L18 gene [Source:MGI Symbol;Acc:MGI:1914088]
ENSMUSG00000030761	141.493	104.47	0.37569	0.0010994	0.012357	Myo7a	protein_coding	myosin VIIA [Source:MGI Symbol;Acc:MGI:104510]
ENSMUSG00000034621	365.342	297.557	0.27613	0.0011019	0.012374	Gpatch8	protein_coding	G patch domain containing 8 [Source:MGI Symbol;Acc:MGI:1918667]
ENSMUSG00000050912	1121.44	989.215	0.17625	0.0011034	0.012382	Tmem123	protein_coding	transmembrane protein 123 [Source:MGI Symbol;Acc:MGI:1919179]
ENSMUSG00000034438	16.8576	5.84627	0.49582	0.0011154	0.012484	Gbp8	protein_coding	guanylate-binding protein 8 [Source:MGI Symbol;Acc:MGI:1923324]
ENSMUSG00000020003	578.263	674.488	-0.21274	0.0011144	0.012484	Pex7	protein_coding	peroxisomal biogenesis factor 7 [Source:MGI Symbol;Acc:MGI:1321392]
ENSMUSG00000031158	517.13	631.426	-0.26904	0.0011144	0.012484	Timm17b	protein_coding	translocase of inner mitochondrial membrane 17b [Source:MGI Symbol;Acc:MGI:1343176]
ENSMUSG00000002846	527.268	613.75	-0.21099	0.0011192	0.012517	Timmdc1	protein_coding	translocase of inner mitochondrial membrane domain containing 1 [Source:MGI Symbol;Acc:MGI:1922139]
ENSMUSG00000026544	284.303	343.431	-0.25717	0.0011203	0.012518	Dusp23	protein_coding	dual specificity phosphatase 23 [Source:MGI Symbol;Acc:MGI:1915690]
ENSMUSG00000000266	351.709	287.929	0.26772	0.0011257	0.012569	Mid2	protein_coding	midline 2 [Source:MGI Symbol;Acc:MGI:1344333]
ENSMUSG00000025510	3783.88	4296.19	-0.17804	0.0011353	0.012655	Cd151	protein_coding	CD151 antigen [Source:MGI Symbol;Acc:MGI:1096360]
ENSMUSG00000042350	725.977	875.15	-0.25423	0.0011344	0.012655	Arel1	protein_coding	apoptosis resistant E3 ubiquitin protein ligase 1 [Source:MGI Symbol;Acc:MGI:1915747]
ENSMUSG00000071064	321.646	217.904	0.43564	0.0011493	0.012797	Zfp827	protein_coding	zinc finger protein 827 [Source:MGI Symbol;Acc:MGI:2444807]
ENSMUSG00000029009	200.43	157.064	0.31587	0.0011499	0.012797	Mthfr	protein_coding	5,10-methylenetetrahydrofolate reductase [Source:MGI Symbol;Acc:MGI:106639]
ENSMUSG00000029033	189.458	234.844	-0.28769	0.0011552	0.012845	Acap3	protein_coding	ArfGAP with coiled-coil, ankyrin repeat and PH domains 3 [Source:MGI Symbol;Acc:MGI:2153589]
ENSMUSG00000003345	2033.39	2376.44	-0.21554	0.0011639	0.012931	Csnk1g2	protein_coding	casein kinase 1, gamma 2 [Source:MGI Symbol;Acc:MGI:1920014]
ENSMUSG00000058440	242.34	195.535	0.28271	0.0011665	0.012949	Nrf1	protein_coding	nuclear respiratory factor 1 [Source:MGI Symbol;Acc:MGI:1332235]
ENSMUSG00000038685	119.911	90.6676	0.35196	0.0011734	0.013005	Rtel1	protein_coding	regulator of telomere elongation helicase 1 [Source:MGI Symbol;Acc:MGI:2139369]
ENSMUSG00000020962	387.048	320.829	0.25287	0.0011726	0.013005	Gtf2a1	protein_coding	general transcription factor II A, 1 [Source:MGI Symbol;Acc:MGI:1933277]
ENSMUSG00000086741	27.5726	13.2692	0.52262	0.0011746	0.013007	Gm15816	antisense	predicted gene 15816 [Source:MGI Symbol;Acc:MGI:3802114]
ENSMUSG00000035967	172.853	120.114	0.42169	0.0011871	0.013135	Ddx26b	protein_coding	DEAD/H (Asp-Glu-Ala-Asp/His) box polypeptide 26B [Source:MGI Symbol;Acc:MGI:2442593]
ENSMUSG00000015714	582.818	498.603	0.21622	0.0011928	0.013187	Cers2	protein_coding	ceramide synthase 2 [Source:MGI Symbol;Acc:MGI:1924143]
ENSMUSG00000039770	790.27	919.426	-0.20985	0.0011972	0.013225	Ypel5	protein_coding	yippee-like 5 (Drosophila) [Source:MGI Symbol;Acc:MGI:1916937]
ENSMUSG00000022508	257.613	369.794	-0.41732	0.0012013	0.013259	Bcl6	protein_coding	B cell leukemia/lymphoma 6 [Source:MGI Symbol;Acc:MGI:107187]
ENSMUSG00000027131	542.557	649.804	-0.24606	0.0012051	0.013291	Emc4	protein_coding	ER membrane protein complex subunit 4 [Source:MGI Symbol;Acc:MGI:1915282]
ENSMUSG00000060038	212.943	261.482	-0.27588	0.0012114	0.013349	Dhps	protein_coding	deoxyhypusine synthase [Source:MGI Symbol;Acc:MGI:2683592]
ENSMUSG00000074151	142.652	60.5855	0.51475	0.0012145	0.013372	Nlrc5	protein_coding	NLR family, CARD domain containing 5 [Source:MGI Symbol;Acc:MGI:3612191]
ENSMUSG00000030102	664.753	557.033	0.24032	0.0012196	0.013418	Itpr1	protein_coding	inositol 1,4,5-trisphosphate receptor 1 [Source:MGI Symbol;Acc:MGI:96623]
ENSMUSG00000028743	645.877	798.497	-0.28143	0.001221	0.013422	Akr7a5	protein_coding	aldo-keto reductase family 7, member A5 (aflatoxin aldehyde reductase) [Source:MGI Symbol;Acc:MGI:107796]
ENSMUSG00000020415	1688.73	1891.92	-0.16	0.0012241	0.013445	Pttg1	protein_coding	pituitary tumor-transforming gene 1 [Source:MGI Symbol;Acc:MGI:1353578]
ENSMUSG00000047976	94.0636	62.9303	0.44466	0.0012343	0.013546	Kcna1	protein_coding	potassium voltage-gated channel, shaker-related subfamily, member 1 [Source:MGI Symbol;Acc:MGI:96654]
ENSMUSG00000020527	62.7752	38.3714	0.48656	0.0012421	0.013609	Myo19	protein_coding	myosin XIX [Source:MGI Symbol;Acc:MGI:1913446]
ENSMUSG00000003346	784.774	953.475	-0.26275	0.0012412	0.013609	Abhd17a	protein_coding	abhydrolase domain containing 17A [Source:MGI Symbol;Acc:MGI:106388]
ENSMUSG00000043866	534.007	666.26	-0.29177	0.0012433	0.013612	Taf10	protein_coding	TAF10 RNA polymerase II, TATA box binding protein (TBP)-associated factor [Source:MGI Symbol;Acc:MGI:1346320]
ENSMUSG00000015757	418.181	350.295	0.24183	0.0012536	0.013714	Ppil4	protein_coding	peptidylprolyl isomerase (cyclophilin)-like 4 [Source:MGI Symbol;Acc:MGI:1914668]
ENSMUSG00000033182	250.225	186.521	0.36497	0.0012562	0.013731	Kbtbd12	protein_coding	kelch repeat and BTB (POZ) domain containing 12 [Source:MGI Symbol;Acc:MGI:1918481]
ENSMUSG00000035443	32.6795	52.7834	-0.47915	0.0012591	0.013751	Thyn1	protein_coding	thymocyte nuclear protein 1 [Source:MGI Symbol;Acc:MGI:1925112]
ENSMUSG00000033059	15049.1	17170.3	-0.18414	0.0012615	0.013767	Pygb	protein_coding	brain glycogen phosphorylase [Source:MGI Symbol;Acc:MGI:97828]
ENSMUSG00000033365	1126.99	1326.32	-0.22462	0.0012654	0.013794	Ipo13	protein_coding	importin 13 [Source:MGI Symbol;Acc:MGI:2385205]
ENSMUSG00000026820	816.932	963.99	-0.22794	0.001266	0.013794	Ptges2	protein_coding	prostaglandin E synthase 2 [Source:MGI Symbol;Acc:MGI:1917592]
ENSMUSG00000026895	7462.28	8508.9	-0.18323	0.0012691	0.013816	Ndufa8	protein_coding	NADH dehydrogenase (ubiquinone) 1 alpha subcomplex, 8 [Source:MGI Symbol;Acc:MGI:1915625]
ENSMUSG00000020614	83.8622	56.3074	0.44203	0.0012718	0.013829	Fam20a	protein_coding	family with sequence similarity 20, member A [Source:MGI Symbol;Acc:MGI:2388266]
ENSMUSG00000059895	8840.43	10918.2	-0.28045	0.0012724	0.013829	Ptp4a3	protein_coding	protein tyrosine phosphatase 4a3 [Source:MGI Symbol;Acc:MGI:1277098]
ENSMUSG00000036199	7569.33	9174.23	-0.25896	0.0012752	0.013849	Ndufa13	protein_coding	NADH dehydrogenase (ubiquinone) 1 alpha subcomplex, 13 [Source:MGI Symbol;Acc:MGI:1914434]
ENSMUSG00000030554	289.2	224.514	0.32274	0.0012774	0.013862	Synm	protein_coding	synemin, intermediate filament protein [Source:MGI Symbol;Acc:MGI:2661187]
ENSMUSG00000008398	649.808	492.022	0.3481	0.0012814	0.013894	Elk3	protein_coding	ELK3, member of ETS oncogene family [Source:MGI Symbol;Acc:MGI:101762]
ENSMUSG00000044694	29.4649	14.3979	0.51847	0.0012862	0.013918	2010007H06Rik	antisense	RIKEN cDNA 2010007H06 gene [Source:MGI Symbol;Acc:MGI:1917099]
ENSMUSG00000021910	2952.89	2614.06	0.17142	0.0012878	0.013918	Nisch	protein_coding	nischarin [Source:MGI Symbol;Acc:MGI:1928323]
ENSMUSG00000032109	339.9	409.359	-0.2523	0.0012863	0.013918	Nlrx1	protein_coding	NLR family member X1 [Source:MGI Symbol;Acc:MGI:2429611]
ENSMUSG00000034863	643.855	833.483	-0.3303	0.0012876	0.013918	Ano8	protein_coding	anoctamin 8 [Source:MGI Symbol;Acc:MGI:2687327]
ENSMUSG00000059146	19.0767	7.63876	0.50507	0.0012945	0.01398	Ntrk3	protein_coding	neurotrophic tyrosine kinase, receptor, type 3 [Source:MGI Symbol;Acc:MGI:97385]
ENSMUSG00000025651	20020.4	23209.5	-0.20459	0.0012988	0.014015	Uqcrc1	protein_coding	ubiquinol-cytochrome c reductase core protein 1 [Source:MGI Symbol;Acc:MGI:107876]
ENSMUSG00000023938	451.405	530.654	-0.22343	0.0012999	0.014016	Aars2	protein_coding	alanyl-tRNA synthetase 2, mitochondrial (putative) [Source:MGI Symbol;Acc:MGI:2681839]
ENSMUSG00000025885	566.005	652.441	-0.19691	0.0013046	0.014055	Myo5b	protein_coding	myosin VB [Source:MGI Symbol;Acc:MGI:106598]
ENSMUSG00000027474	329.983	251.157	0.34506	0.0013172	0.014179	Ccm2l	protein_coding	cerebral cavernous malformation 2-like [Source:MGI Symbol;Acc:MGI:2385159]
ENSMUSG00000030802	1692.11	1965.62	-0.20748	0.0013323	0.014331	Bckdk	protein_coding	branched chain ketoacid dehydrogenase kinase [Source:MGI Symbol;Acc:MGI:1276121]
ENSMUSG00000026785	207.77	149.442	0.39552	0.0013352	0.014351	Pkn3	protein_coding	protein kinase N3 [Source:MGI Symbol;Acc:MGI:2388285]
ENSMUSG00000029433	657.289	755.322	-0.19356	0.0013372	0.014355	Diablo	protein_coding	diablo homolog (Drosophila) [Source:MGI Symbol;Acc:MGI:1913843]
ENSMUSG00000030872	920.813	1068.03	-0.20633	0.0013378	0.014355	Gga2	protein_coding	golgi associated, gamma adaptin ear containing, ARF binding protein 2 [Source:MGI Symbol;Acc:MGI:1921355]
ENSMUSG00000010492	24.7785	44.9357	-0.50861	0.0013418	0.014388	Uckl1os	antisense	uridine-cytidine kinase 1-like 1, opposite strand [Source:MGI Symbol;Acc:MGI:3801877]
ENSMUSG00000002104	232.464	303.055	-0.33754	0.0013441	0.014401	Rapsn	protein_coding	receptor-associated protein of the synapse [Source:MGI Symbol;Acc:MGI:99422]
ENSMUSG00000039405	198.74	154.85	0.32103	0.0013513	0.014466	Prss23	protein_coding	protease, serine 23 [Source:MGI Symbol;Acc:MGI:1923703]
ENSMUSG00000001128	156.372	113.882	0.38431	0.0013557	0.014501	Cfp	protein_coding	complement factor properdin [Source:MGI Symbol;Acc:MGI:97545]
ENSMUSG00000026255	72.0555	47.1874	0.45327	0.0013656	0.014596	Efhd1	protein_coding	EF hand domain containing 1 [Source:MGI Symbol;Acc:MGI:1921607]
ENSMUSG00000072640	511.032	610.299	-0.24175	0.0013683	0.014613	Lyrm9	protein_coding	LYR motif containing 9 [Source:MGI Symbol;Acc:MGI:1913524]
ENSMUSG00000014769	1817.21	2117.11	-0.21074	0.001372	0.014641	Psmb1	protein_coding	proteasome (prosome, macropain) subunit, beta type 1 [Source:MGI Symbol;Acc:MGI:104884]
ENSMUSG00000019822	429.299	536.523	-0.29273	0.001375	0.014662	Smpd2	protein_coding	sphingomyelin phosphodiesterase 2, neutral [Source:MGI Symbol;Acc:MGI:1278330]
ENSMUSG00000002379	3996.41	4800.82	-0.24826	0.001381	0.014679	Ndufa11	protein_coding	NADH dehydrogenase (ubiquinone) 1 alpha subcomplex 11 [Source:MGI Symbol;Acc:MGI:1917125]
ENSMUSG00000032180	674.736	830.535	-0.27709	0.00138	0.014679	Tmed1	protein_coding	transmembrane emp24 domain containing 1 [Source:MGI Symbol;Acc:MGI:106201]
ENSMUSG00000020303	269.228	378.998	-0.40269	0.0013802	0.014679	Stc2	protein_coding	stanniocalcin 2 [Source:MGI Symbol;Acc:MGI:1316731]
ENSMUSG00000035828	1589.8	2554.55	-0.47481	0.0013787	0.014679	Pim3	protein_coding	proviral integration site 3 [Source:MGI Symbol;Acc:MGI:1355297]
ENSMUSG00000047085	573.198	400.536	0.41226	0.001386	0.014712	Lrrc4b	protein_coding	leucine rich repeat containing 4B [Source:MGI Symbol;Acc:MGI:3027390]
ENSMUSG00000024862	1112.69	1324.55	-0.23775	0.0013872	0.014712	Klc2	protein_coding	kinesin light chain 2 [Source:MGI Symbol;Acc:MGI:107953]
ENSMUSG00000060882	307.755	368.346	-0.24447	0.0013873	0.014712	Kcnd2	protein_coding	potassium voltage-gated channel, Shal-related family, member 2 [Source:MGI Symbol;Acc:MGI:102663]
ENSMUSG00000030057	5478.68	5940.72	-0.11543	0.0013929	0.014759	Cnbp	protein_coding	cellular nucleic acid binding protein [Source:MGI Symbol;Acc:MGI:88431]
ENSMUSG00000033191	1922.23	1620.44	0.23263	0.0013956	0.014776	Tie1	protein_coding	tyrosine kinase with immunoglobulin-like and EGF-like domains 1 [Source:MGI Symbol;Acc:MGI:99906]
ENSMUSG00000023439	237.447	180.874	0.34236	0.0013997	0.014808	Gnb3	protein_coding	guanine nucleotide binding protein (G protein), beta 3 [Source:MGI Symbol;Acc:MGI:95785]
ENSMUSG00000014498	651.985	510.051	0.31716	0.0014014	0.01481	Ankrd52	protein_coding	ankyrin repeat domain 52 [Source:MGI Symbol;Acc:MGI:2444029]
ENSMUSG00000062908	27038.4	29742.4	-0.13516	0.0014021	0.01481	Acadm	protein_coding	acyl-Coenzyme A dehydrogenase, medium chain [Source:MGI Symbol;Acc:MGI:87867]
ENSMUSG00000053293	264.633	213.165	0.28563	0.0014046	0.014825	Pom121	protein_coding	nuclear pore membrane protein 121 [Source:MGI Symbol;Acc:MGI:2137624]
ENSMUSG00000060441	43.9413	25.7008	0.49099	0.0014084	0.014853	Trim5	protein_coding	tripartite motif-containing 5 [Source:MGI Symbol;Acc:MGI:3646853]
ENSMUSG00000056579	651.288	548.331	0.23585	0.0014095	0.014854	Tug1	processed_transcript	taurine upregulated gene 1 [Source:MGI Symbol;Acc:MGI:2144114]
ENSMUSG00000063415	535.5	110.139	0.41135	0.0014107	0.014855	Cyp26b1	protein_coding	cytochrome P450, family 26, subfamily b, polypeptide 1 [Source:MGI Symbol;Acc:MGI:2176159]
ENSMUSG00000047187	3164.07	3530.86	-0.15445	0.0014119	0.014855	Rab2a	protein_coding	RAB2A, member RAS oncogene family [Source:MGI Symbol;Acc:MGI:1928750]
ENSMUSG00000020863	1128.37	866.775	0.33561	0.001421	0.01494	Luc7l3	protein_coding	LUC7-like 3 (S. cerevisiae) [Source:MGI Symbol;Acc:MGI:1914934]
ENSMUSG00000002477	193.587	236.966	-0.27184	0.0014314	0.015037	Snrpd1	protein_coding	small nuclear ribonucleoprotein D1 [Source:MGI Symbol;Acc:MGI:98344]
ENSMUSG00000051451	416.828	342.235	0.26379	0.0014333	0.015046	Crebzf	protein_coding	CREB/ATF bZIP transcription factor [Source:MGI Symbol;Acc:MGI:2675296]
ENSMUSG00000026589	46.0142	26.4916	0.49647	0.0014357	0.01506	Sec16b	protein_coding	SEC16 homolog B (S. cerevisiae) [Source:MGI Symbol;Acc:MGI:2148802]
ENSMUSG00000028413	1405.49	1195.02	0.2225	0.0014409	0.01509	B4galt1	protein_coding	UDP-Gal:betaGlcNAc beta 1,4- galactosyltransferase, polypeptide 1 [Source:MGI Symbol;Acc:MGI:95705]
ENSMUSG00000028821	882.477	998.895	-0.17449	0.0014399	0.01509	Syf2	protein_coding	SYF2 homolog, RNA splicing factor (S. cerevisiae) [Source:MGI Symbol;Acc:MGI:1915842]
ENSMUSG00000040652	3263.95	3660.06	-0.16127	0.0014428	0.015098	Oaz2	protein_coding	ornithine decarboxylase antizyme 2 [Source:MGI Symbol;Acc:MGI:109492]
ENSMUSG00000055128	280.871	345.146	-0.27388	0.0014465	0.015125	Cgrrf1	protein_coding	cell growth regulator with ring finger domain 1 [Source:MGI Symbol;Acc:MGI:1916368]
ENSMUSG00000003531	373.741	451.324	-0.2549	0.001462	0.015276	Dgcr6	protein_coding	DiGeorge syndrome critical region gene 6 [Source:MGI Symbol;Acc:MGI:1202877]
ENSMUSG00000050737	47.1726	26.3359	0.50234	0.001466	0.015306	Ptges	protein_coding	prostaglandin E synthase [Source:MGI Symbol;Acc:MGI:1927593]
ENSMUSG00000034898	1111.79	822.776	0.36837	0.0014722	0.015333	Filip1	protein_coding	filamin A interacting protein 1 [Source:MGI Symbol;Acc:MGI:1917848]
ENSMUSG00000021114	1651.05	1857.27	-0.16529	0.0014731	0.015333	Atp6v1d	protein_coding	ATPase, H+ transporting, lysosomal V1 subunit D [Source:MGI Symbol;Acc:MGI:1921084]
ENSMUSG00000043154	4544.79	5187.65	-0.18467	0.0014717	0.015333	Ppp2r3a	protein_coding	protein phosphatase 2, regulatory subunit B'', alpha [Source:MGI Symbol;Acc:MGI:2442104]
ENSMUSG00000038628	251.611	308.417	-0.27274	0.0014722	0.015333	Polr3k	protein_coding	polymerase (RNA) III (DNA directed) polypeptide K [Source:MGI Symbol;Acc:MGI:1914255]
ENSMUSG00000022956	8795.85	10092.3	-0.19114	0.0014807	0.0154	Atp5o	protein_coding	ATP synthase, H+ transporting, mitochondrial F1 complex, O subunit [Source:MGI Symbol;Acc:MGI:106341]
ENSMUSG00000002052	947.162	816.92	0.205	0.0014826	0.015407	Supt6	protein_coding	suppressor of Ty 6 [Source:MGI Symbol;Acc:MGI:107726]
ENSMUSG00000024384	513.164	441.55	0.20861	0.0014929	0.015491	Iws1	protein_coding	IWS1 homolog (S. cerevisiae) [Source:MGI Symbol;Acc:MGI:1920723]
ENSMUSG00000047067	210.462	263.542	-0.29576	0.0014928	0.015491	Dusp28	protein_coding	dual specificity phosphatase 28 [Source:MGI Symbol;Acc:MGI:1914696]
ENSMUSG00000061778	169.705	129.684	0.34089	0.0015047	0.015589	Mospd2	protein_coding	motile sperm domain containing 2 [Source:MGI Symbol;Acc:MGI:1924013]
ENSMUSG00000020743	643.216	534.399	0.24937	0.0015039	0.015589	Mif4gd	protein_coding	MIF4G domain containing [Source:MGI Symbol;Acc:MGI:1916924]
ENSMUSG00000030826	2513.58	3036.56	-0.25471	0.0015063	0.015594	Bcat2	protein_coding	branched chain aminotransferase 2, mitochondrial [Source:MGI Symbol;Acc:MGI:1276534]
ENSMUSG00000029338	2163.87	2480.75	-0.19015	0.0015106	0.015614	Antxr2	protein_coding	anthrax toxin receptor 2 [Source:MGI Symbol;Acc:MGI:1919164]
ENSMUSG00000038803	77.5741	105.406	-0.37313	0.0015101	0.015614	Ost4	protein_coding	oligosaccharyltransferase 4 homolog (S. cerevisiae) [Source:MGI Symbol;Acc:MGI:1914945]
ENSMUSG00000031634	281.23	339.702	-0.25436	0.0015284	0.015786	Ufsp2	protein_coding	UFM1-specific peptidase 2 [Source:MGI Symbol;Acc:MGI:1913679]
ENSMUSG00000086740	38.2405	21.4969	0.49909	0.0015347	0.01584	Gm17029	antisense	predicted gene 17029 [Source:MGI Symbol;Acc:MGI:4937856]
ENSMUSG00000029319	1919.36	2140.54	-0.15371	0.0015371	0.015853	Coq2	protein_coding	coenzyme Q2 homolog, prenyltransferase (yeast) [Source:MGI Symbol;Acc:MGI:1919133]
ENSMUSG00000028837	998.188	1168.6	-0.21673	0.0015465	0.015937	Psmb2	protein_coding	proteasome (prosome, macropain) subunit, beta type 2 [Source:MGI Symbol;Acc:MGI:1347045]
ENSMUSG00000030513	1043.89	926.851	0.16613	0.0015486	0.015947	Pcsk6	protein_coding	proprotein convertase subtilisin/kexin type 6 [Source:MGI Symbol;Acc:MGI:102897]
ENSMUSG00000030731	45.0138	67.3193	-0.44041	0.0015537	0.015987	Syt3	protein_coding	synaptotagmin III [Source:MGI Symbol;Acc:MGI:99665]
ENSMUSG00000021420	981.967	1105.43	-0.1669	0.001557	0.016008	Fars2	protein_coding	phenylalanine-tRNA synthetase 2 (mitochondrial) [Source:MGI Symbol;Acc:MGI:1917205]
ENSMUSG00000022010	5136.27	5989.45	-0.2116	0.0015628	0.016056	Tsc22d1	protein_coding	TSC22 domain family, member 1 [Source:MGI Symbol;Acc:MGI:109127]
ENSMUSG00000040170	762.49	1060.73	-0.39055	0.0015643	0.016059	Fmo2	protein_coding	flavin containing monooxygenase 2 [Source:MGI Symbol;Acc:MGI:1916776]
ENSMUSG00000025170	79.6421	108.701	-0.37183	0.0015667	0.016072	Rab40b	protein_coding	Rab40B, member RAS oncogene family [Source:MGI Symbol;Acc:MGI:2183451]
ENSMUSG00000032058	145.338	109.981	0.34843	0.0015785	0.016181	Ppp2r1b	protein_coding	protein phosphatase 2, regulatory subunit A, beta [Source:MGI Symbol;Acc:MGI:1920949]
ENSMUSG00000034161	128.021	88.8481	0.41338	0.0015799	0.016182	Scx	protein_coding	scleraxis [Source:MGI Symbol;Acc:MGI:102934]
ENSMUSG00000027639	683.912	525.608	0.33375	0.0015831	0.016203	Samhd1	protein_coding	SAM domain and HD domain, 1 [Source:MGI Symbol;Acc:MGI:1927468]
ENSMUSG00000031438	903.585	1050.34	-0.20757	0.0015847	0.016207	Rnf128	protein_coding	ring finger protein 128 [Source:MGI Symbol;Acc:MGI:1914139]
ENSMUSG00000031489	34.6951	4.46438	0.36317	0.001591	0.016253	Adrb3	protein_coding	adrenergic receptor, beta 3 [Source:MGI Symbol;Acc:MGI:87939]
ENSMUSG00000038546	625.256	533.009	0.2198	0.0015916	0.016253	Ranbp9	protein_coding	RAN binding protein 9 [Source:MGI Symbol;Acc:MGI:1928741]
ENSMUSG00000049404	26.0364	13.3049	0.50789	0.0015969	0.016255	Rarres1	protein_coding	retinoic acid receptor responder (tazarotene induced) 1 [Source:MGI Symbol;Acc:MGI:1924461]
ENSMUSG00000049001	122.752	88.5845	0.39089	0.0015959	0.016255	Ndnf	protein_coding	neuron-derived neurotrophic factor [Source:MGI Symbol;Acc:MGI:1915419]
ENSMUSG00000041220	132.103	16.3061	0.35956	0.0015978	0.016255	Elovl6	protein_coding	ELOVL family member 6, elongation of long chain fatty acids (yeast) [Source:MGI Symbol;Acc:MGI:2156528]
ENSMUSG00000022032	525.117	432.1	0.26126	0.0015954	0.016255	Scara5	protein_coding	scavenger receptor class A, member 5 (putative) [Source:MGI Symbol;Acc:MGI:1918395]
ENSMUSG00000038910	246.407	302.858	-0.27471	0.0015978	0.016255	Plcl2	protein_coding	phospholipase C-like 2 [Source:MGI Symbol;Acc:MGI:1352756]
ENSMUSG00000024790	134.89	186.756	-0.38738	0.0016007	0.016272	Sac3d1	protein_coding	SAC3 domain containing 1 [Source:MGI Symbol;Acc:MGI:1913656]
ENSMUSG00000045948	612.267	733.09	-0.24414	0.0016051	0.016292	Mrps12	protein_coding	mitochondrial ribosomal protein S12 [Source:MGI Symbol;Acc:MGI:1346333]
ENSMUSG00000019433	436.757	528.155	-0.25654	0.0016051	0.016292	Gipc1	protein_coding	GIPC PDZ domain containing family, member 1 [Source:MGI Symbol;Acc:MGI:1926252]
ENSMUSG00000060923	1117.23	1303.77	-0.21241	0.0016075	0.016304	Acyp2	protein_coding	acylphosphatase 2, muscle type [Source:MGI Symbol;Acc:MGI:1922822]
ENSMUSG00000028977	869.525	690.6	0.29992	0.0016103	0.016321	Casz1	protein_coding	castor zinc finger 1 [Source:MGI Symbol;Acc:MGI:1196251]
ENSMUSG00000085396	101.385	59.6637	0.48865	0.001626	0.016467	Firre	processed_transcript	functional intergenic repeating RNA element [Source:MGI Symbol;Acc:MGI:2147989]
ENSMUSG00000063802	509.465	603.109	-0.23086	0.0016329	0.016525	Hspbp1	protein_coding	HSPA (heat shock 70kDa) binding protein, cytoplasmic cochaperone 1 [Source:MGI Symbol;Acc:MGI:1913495]
ENSMUSG00000036561	650.974	748.347	-0.19523	0.0016342	0.016526	Ppp6r2	protein_coding	protein phosphatase 6, regulatory subunit 2 [Source:MGI Symbol;Acc:MGI:1918724]
ENSMUSG00000039662	800.314	911.278	-0.1813	0.0016426	0.016598	Icmt	protein_coding	isoprenylcysteine carboxyl methyltransferase [Source:MGI Symbol;Acc:MGI:1888594]
ENSMUSG00000036570	6651.02	7846.22	-0.22593	0.0016458	0.016617	Fxyd1	protein_coding	FXYD domain-containing ion transport regulator 1 [Source:MGI Symbol;Acc:MGI:1889273]
ENSMUSG00000032370	358.469	423.482	-0.22866	0.001648	0.016628	Lactb	protein_coding	lactamase, beta [Source:MGI Symbol;Acc:MGI:1933395]
ENSMUSG00000030814	463.62	599.211	-0.32703	0.0016504	0.016639	Bcl7c	protein_coding	B cell CLL/lymphoma 7C [Source:MGI Symbol;Acc:MGI:1332237]
ENSMUSG00000002997	195.451	52.0898	0.43425	0.0016585	0.016686	Prkar2b	protein_coding	protein kinase, cAMP dependent regulatory, type II beta [Source:MGI Symbol;Acc:MGI:97760]
ENSMUSG00000054027	1155.41	967.057	0.24191	0.0016587	0.016686	Nt5dc3	protein_coding	5'-nucleotidase domain containing 3 [Source:MGI Symbol;Acc:MGI:3513266]
ENSMUSG00000011096	1268.96	1544.95	-0.26349	0.0016576	0.016686	Akt1s1	protein_coding	AKT1 substrate 1 (proline-rich) [Source:MGI Symbol;Acc:MGI:1914855]
ENSMUSG00000028825	198.764	252.716	-0.31304	0.001661	0.016696	Rhd	protein_coding	Rh blood group, D antigen [Source:MGI Symbol;Acc:MGI:1202882]
ENSMUSG00000025348	2531.58	3037.2	-0.24641	0.0016734	0.016808	Itga7	protein_coding	integrin alpha 7 [Source:MGI Symbol;Acc:MGI:102700]
ENSMUSG00000036986	155.142	112.255	0.38333	0.0016782	0.016845	Pml	protein_coding	promyelocytic leukemia [Source:MGI Symbol;Acc:MGI:104662]
ENSMUSG00000054387	535.023	363.144	0.42894	0.0016835	0.016872	Mdm4	protein_coding	transformed mouse 3T3 cell double minute 4 [Source:MGI Symbol;Acc:MGI:107934]
ENSMUSG00000015943	281.064	342.887	-0.26787	0.0016824	0.016872	Bola1	protein_coding	bolA-like 1 (E. coli) [Source:MGI Symbol;Acc:MGI:1916418]
ENSMUSG00000029528	1039.6	902.588	0.19651	0.0016893	0.016918	Pxn	protein_coding	paxillin [Source:MGI Symbol;Acc:MGI:108295]
ENSMUSG00000028164	486.553	413.308	0.22329	0.0016975	0.016988	Manba	protein_coding	mannosidase, beta A, lysosomal [Source:MGI Symbol;Acc:MGI:88175]
ENSMUSG00000002102	2952.8	3288.13	-0.15156	0.0017022	0.017009	Psmc3	protein_coding	proteasome (prosome, macropain) 26S subunit, ATPase 3 [Source:MGI Symbol;Acc:MGI:1098754]
ENSMUSG00000005779	2305.71	2658.5	-0.19741	0.0017019	0.017009	Psmb4	protein_coding	proteasome (prosome, macropain) subunit, beta type 4 [Source:MGI Symbol;Acc:MGI:1098257]
ENSMUSG00000017288	361.35	427.322	-0.22891	0.0017102	0.017076	Vps53	protein_coding	vacuolar protein sorting 53 (yeast) [Source:MGI Symbol;Acc:MGI:1915549]
ENSMUSG00000000325	359.263	287.998	0.29021	0.001715	0.017102	Arvcf	protein_coding	armadillo repeat gene deleted in velo-cardio-facial syndrome [Source:MGI Symbol;Acc:MGI:109620]
ENSMUSG00000024759	382.663	314.213	0.26209	0.0017152	0.017102	Atl3	protein_coding	atlastin GTPase 3 [Source:MGI Symbol;Acc:MGI:1924270]
ENSMUSG00000023067	1062.95	410.45	0.48469	0.0017225	0.017119	Cdkn1a	protein_coding	cyclin-dependent kinase inhibitor 1A (P21) [Source:MGI Symbol;Acc:MGI:104556]
ENSMUSG00000024462	281.511	226.231	0.28996	0.0017195	0.017119	Gabbr1	protein_coding	gamma-aminobutyric acid (GABA) B receptor, 1 [Source:MGI Symbol;Acc:MGI:1860139]
ENSMUSG00000029199	806.95	921.342	-0.18578	0.0017215	0.017119	Lias	protein_coding	lipoic acid synthetase [Source:MGI Symbol;Acc:MGI:1934604]
ENSMUSG00000031458	209.85	267.64	-0.31459	0.0017221	0.017119	Coprs	protein_coding	coordinator of PRMT5, differentiation stimulator [Source:MGI Symbol;Acc:MGI:1913673]
ENSMUSG00000048756	1635.45	2222.19	-0.37102	0.0017233	0.017119	Foxo3	protein_coding	forkhead box O3 [Source:MGI Symbol;Acc:MGI:1890081]
ENSMUSG00000032171	939.122	1106.45	-0.22439	0.001736	0.017229	Pin1	protein_coding	protein (peptidyl-prolyl cis/trans isomerase) NIMA-interacting 1 [Source:MGI Symbol;Acc:MGI:1346036]
ENSMUSG00000036002	396.043	484.04	-0.26843	0.0017369	0.017229	Fam214b	protein_coding	family with sequence similarity 214, member B [Source:MGI Symbol;Acc:MGI:2441854]
ENSMUSG00000025092	541.385	438.057	0.27943	0.0017421	0.017267	Hspa12a	protein_coding	heat shock protein 12A [Source:MGI Symbol;Acc:MGI:1920692]
ENSMUSG00000047379	941.382	1075.39	-0.18599	0.0017461	0.017294	B3gnt1	protein_coding	UDP-GlcNAc:betaGal beta-1,3-N-acetylglucosaminyltransferase 1 [Source:MGI Symbol;Acc:MGI:1919680]
ENSMUSG00000038722	346.35	415.029	-0.24601	0.0017484	0.017294	Bud31	protein_coding	BUD31 homolog (yeast) [Source:MGI Symbol;Acc:MGI:2141291]
ENSMUSG00000028670	562.002	680.242	-0.25661	0.0017486	0.017294	Lypla2	protein_coding	lysophospholipase 2 [Source:MGI Symbol;Acc:MGI:1347000]
ENSMUSG00000010277	4930.02	5477.51	-0.14864	0.0017606	0.017396	2610507B11Rik	protein_coding	RIKEN cDNA 2610507B11 gene [Source:MGI Symbol;Acc:MGI:1919753]
ENSMUSG00000023088	354.528	422.383	-0.23907	0.0017615	0.017396	Abcc1	protein_coding	ATP-binding cassette, sub-family C (CFTR/MRP), member 1 [Source:MGI Symbol;Acc:MGI:102676]
ENSMUSG00000026032	4313.2	4983.44	-0.19987	0.0017675	0.017443	Ndufb3	protein_coding	NADH dehydrogenase (ubiquinone) 1 beta subcomplex 3 [Source:MGI Symbol;Acc:MGI:1913745]
ENSMUSG00000078851	77.9907	51.4995	0.44185	0.0017716	0.017456	Hist3h2a	protein_coding	histone cluster 3, H2a [Source:MGI Symbol;Acc:MGI:2448458]
ENSMUSG00000018846	475.312	388.224	0.27024	0.0017762	0.017456	Pank3	protein_coding	pantothenate kinase 3 [Source:MGI Symbol;Acc:MGI:2387464]
ENSMUSG00000026003	20402.5	21780.3	-0.093451	0.0017747	0.017456	Acadl	protein_coding	acyl-Coenzyme A dehydrogenase, long-chain [Source:MGI Symbol;Acc:MGI:87866]
ENSMUSG00000030127	1508.82	1733.94	-0.19332	0.0017704	0.017456	Cops7a	protein_coding	COP9 (constitutive photomorphogenic) homolog, subunit 7a (Arabidopsis thaliana) [Source:MGI Symbol;Acc:MGI:1349400]
ENSMUSG00000039345	426.803	526.98	-0.27936	0.0017766	0.017456	Mettl22	protein_coding	methyltransferase like 22 [Source:MGI Symbol;Acc:MGI:2384301]
ENSMUSG00000026107	706.636	896.403	-0.30729	0.0017749	0.017456	Nabp1	protein_coding	nucleic acid binding protein 1 [Source:MGI Symbol;Acc:MGI:1923258]
ENSMUSG00000096780	247.075	164.108	0.44043	0.0017813	0.017489	Tmem181b-ps	pseudogene	transmembrane protein 181B, pseudogene [Source:MGI Symbol;Acc:MGI:3779544]
ENSMUSG00000027513	420.749	70.0682	0.37655	0.0017881	0.017518	Pck1	protein_coding	phosphoenolpyruvate carboxykinase 1, cytosolic [Source:MGI Symbol;Acc:MGI:97501]
ENSMUSG00000003308	863.223	998.93	-0.20292	0.001788	0.017518	Keap1	protein_coding	kelch-like ECH-associated protein 1 [Source:MGI Symbol;Acc:MGI:1858732]
ENSMUSG00000014551	589.998	690.721	-0.21602	0.0017871	0.017518	Mrps25	protein_coding	mitochondrial ribosomal protein S25 [Source:MGI Symbol;Acc:MGI:1928140]
ENSMUSG00000021917	1173.67	1325.28	-0.16997	0.0017996	0.017605	Spcs1	protein_coding	signal peptidase complex subunit 1 homolog (S. cerevisiae) [Source:MGI Symbol;Acc:MGI:1916269]
ENSMUSG00000001555	416.848	515.158	-0.28058	0.001799	0.017605	Fkbp10	protein_coding	FK506 binding protein 10 [Source:MGI Symbol;Acc:MGI:104769]
ENSMUSG00000015697	278.018	219.05	0.31049	0.0018045	0.017625	Setdb1	protein_coding	SET domain, bifurcated 1 [Source:MGI Symbol;Acc:MGI:1934229]
ENSMUSG00000033065	18982.4	21403.4	-0.16822	0.0018055	0.017625	Pfkm	protein_coding	phosphofructokinase, muscle [Source:MGI Symbol;Acc:MGI:97548]
ENSMUSG00000021235	808.317	929.833	-0.19475	0.0018042	0.017625	Coq6	protein_coding	coenzyme Q6 homolog (yeast) [Source:MGI Symbol;Acc:MGI:1924408]
ENSMUSG00000064326	209.195	261.358	-0.28998	0.0018172	0.017726	Siva1	protein_coding	SIVA1, apoptosis-inducing factor [Source:MGI Symbol;Acc:MGI:1353606]
ENSMUSG00000048040	35.9556	13.1983	0.47474	0.0018231	0.017745	Arxes2	protein_coding	adipocyte-related X-chromosome expressed sequence 2 [Source:MGI Symbol;Acc:MGI:1924226]
ENSMUSG00000078684	105.707	75.0734	0.39529	0.0018205	0.017745	5830417I10Rik	pseudogene	RIKEN cDNA 5830417I10 gene [Source:MGI Symbol;Acc:MGI:1923272]
ENSMUSG00000074909	322.357	254.376	0.30897	0.0018219	0.017745	Ranbp6	protein_coding	RAN binding protein 6 [Source:MGI Symbol;Acc:MGI:2683212]
ENSMUSG00000039670	314.177	381.991	-0.26257	0.0018359	0.017857	Oxld1	protein_coding	oxidoreductase like domain containing 1 [Source:MGI Symbol;Acc:MGI:1913681]
ENSMUSG00000041390	400.594	317.531	0.30029	0.0018391	0.017862	Mdfic	protein_coding	MyoD family inhibitor domain containing [Source:MGI Symbol;Acc:MGI:104611]
ENSMUSG00000028964	3772.59	4318.89	-0.18799	0.0018383	0.017862	Park7	protein_coding	Parkinson disease (autosomal recessive, early onset) 7 [Source:MGI Symbol;Acc:MGI:2135637]
ENSMUSG00000028919	638.477	517.28	0.27698	0.0018447	0.017904	Arhgef19	protein_coding	Rho guanine nucleotide exchange factor (GEF) 19 [Source:MGI Symbol;Acc:MGI:1925912]
ENSMUSG00000019370	3648.61	4209.21	-0.19811	0.0018474	0.017917	Calm3	protein_coding	calmodulin 3 [Source:MGI Symbol;Acc:MGI:103249]
ENSMUSG00000024234	251.085	205.265	0.26549	0.001849	0.01792	Mtpap	protein_coding	mitochondrial poly(A) polymerase [Source:MGI Symbol;Acc:MGI:1914690]
ENSMUSG00000021009	658.377	546.313	0.25219	0.0018582	0.017993	Ptpn21	protein_coding	protein tyrosine phosphatase, non-receptor type 21 [Source:MGI Symbol;Acc:MGI:1344406]
ENSMUSG00000038393	3477.94	6201.38	-0.49272	0.0018592	0.017993	Txnip	protein_coding	thioredoxin interacting protein [Source:MGI Symbol;Acc:MGI:1889549]
ENSMUSG00000026688	3326.92	3821.65	-0.19234	0.0018656	0.018042	Mgst3	protein_coding	microsomal glutathione S-transferase 3 [Source:MGI Symbol;Acc:MGI:1913697]
ENSMUSG00000004677	529.035	419.442	0.30209	0.0018682	0.018054	Myo9b	protein_coding	myosin IXb [Source:MGI Symbol;Acc:MGI:106624]
ENSMUSG00000021963	1361.51	1540.38	-0.17279	0.0018709	0.018067	Sap18	protein_coding	Sin3-associated polypeptide 18 [Source:MGI Symbol;Acc:MGI:1277978]
ENSMUSG00000078922	87.1299	41.5938	0.50019	0.0018754	0.018097	Tgtp1	protein_coding	T cell specific GTPase 1 [Source:MGI Symbol;Acc:MGI:98734]
ENSMUSG00000022636	66.2411	43.9768	0.43973	0.0018822	0.018147	Alcam	protein_coding	activated leukocyte cell adhesion molecule [Source:MGI Symbol;Acc:MGI:1313266]
ENSMUSG00000053358	82.4199	110.922	-0.36253	0.0018832	0.018147	Gm9905	protein_coding	predicted gene 9905 [Source:MGI Symbol;Acc:MGI:3642311]
ENSMUSG00000023064	188.237	236.798	-0.29966	0.0018893	0.018193	Sncg	protein_coding	synuclein, gamma [Source:MGI Symbol;Acc:MGI:1298397]
ENSMUSG00000025153	1982.29	513.508	0.42243	0.001893	0.018216	Fasn	protein_coding	fatty acid synthase [Source:MGI Symbol;Acc:MGI:95485]
ENSMUSG00000075701	507.235	588.132	-0.20268	0.0018964	0.018236	Vimp	protein_coding	VCP-interacting membrane protein [Source:MGI Symbol;Acc:MGI:95994]
ENSMUSG00000026923	599.718	481.586	0.28732	0.0019007	0.01824	Notch1	protein_coding	notch 1 [Source:MGI Symbol;Acc:MGI:97363]
ENSMUSG00000084786	3178.25	3627.22	-0.18404	0.0018991	0.01824	Ubl5	protein_coding	ubiquitin-like 5 [Source:MGI Symbol;Acc:MGI:1913427]
ENSMUSG00000042541	1841.57	2143.47	-0.20895	0.001901	0.01824	Shfm1	protein_coding	split hand/foot malformation (ectrodactyly) type 1 [Source:MGI Symbol;Acc:MGI:109238]
ENSMUSG00000030104	249.044	186.15	0.35903	0.0019187	0.018397	Edem1	protein_coding	ER degradation enhancer, mannosidase alpha-like 1 [Source:MGI Symbol;Acc:MGI:2180139]
ENSMUSG00000024826	884.342	752.276	0.22139	0.0019214	0.01841	Dpf2	protein_coding	D4, zinc and double PHD fingers family 2 [Source:MGI Symbol;Acc:MGI:109529]
ENSMUSG00000022848	897.842	1023.1	-0.18244	0.0019303	0.018469	Dirc2	protein_coding	disrupted in renal carcinoma 2 (human) [Source:MGI Symbol;Acc:MGI:2387188]
ENSMUSG00000004285	928.58	1090.16	-0.2196	0.0019307	0.018469	Atp6v1f	protein_coding	ATPase, H+ transporting, lysosomal V1 subunit F [Source:MGI Symbol;Acc:MGI:1913394]
ENSMUSG00000027834	136.012	177.975	-0.33647	0.0019317	0.018469	Serpini1	protein_coding	serine (or cysteine) peptidase inhibitor, clade I, member 1 [Source:MGI Symbol;Acc:MGI:1194506]
ENSMUSG00000028953	804.061	918.574	-0.18567	0.0019364	0.018501	Abcf2	protein_coding	ATP-binding cassette, sub-family F (GCN20), member 2 [Source:MGI Symbol;Acc:MGI:1351657]
ENSMUSG00000046532	109.373	81.0811	0.36556	0.0019413	0.018522	Ar	protein_coding	androgen receptor [Source:MGI Symbol;Acc:MGI:88064]
ENSMUSG00000083282	796.029	923.462	-0.20548	0.0019407	0.018522	Ctsf	protein_coding	cathepsin F [Source:MGI Symbol;Acc:MGI:1861434]
ENSMUSG00000046743	230.95	167.498	0.38104	0.0019461	0.018554	Fat4	protein_coding	FAT tumor suppressor homolog 4 (Drosophila) [Source:MGI Symbol;Acc:MGI:3045256]
ENSMUSG00000032534	526.962	608.775	-0.19923	0.0019518	0.018596	Cep63	protein_coding	centrosomal protein 63 [Source:MGI Symbol;Acc:MGI:2158560]
ENSMUSG00000085793	205.182	247.945	-0.25329	0.0019542	0.018605	Lin52	protein_coding	lin-52 homolog (C. elegans) [Source:MGI Symbol;Acc:MGI:3045391]
ENSMUSG00000020496	2745.17	3130.89	-0.18332	0.0019566	0.018615	Rnf187	protein_coding	ring finger protein 187 [Source:MGI Symbol;Acc:MGI:1914224]
ENSMUSG00000018362	555.659	668.317	-0.24742	0.0019625	0.018659	Kpna2	protein_coding	karyopherin (importin) alpha 2 [Source:MGI Symbol;Acc:MGI:103561]
ENSMUSG00000035413	356.943	452.208	-0.3065	0.0019665	0.018683	Tmem98	protein_coding	transmembrane protein 98 [Source:MGI Symbol;Acc:MGI:1923457]
ENSMUSG00000023904	1305.01	1561.15	-0.24232	0.0019719	0.018721	Hcfc1r1	protein_coding	host cell factor C1 regulator 1 (XPO1-dependent) [Source:MGI Symbol;Acc:MGI:2663619]
ENSMUSG00000097397	15.6238	6.43171	0.48655	0.0019763	0.01875	Gm16861	lincRNA	predicted gene, 16861 [Source:MGI Symbol;Acc:MGI:4439785]
ENSMUSG00000031245	433.27	506.558	-0.21569	0.0019822	0.018793	Hmgn5	protein_coding	high-mobility group nucleosome binding domain 5 [Source:MGI Symbol;Acc:MGI:1355295]
ENSMUSG00000037031	233.865	173.895	0.35946	0.0019974	0.018923	Tspan15	protein_coding	tetraspanin 15 [Source:MGI Symbol;Acc:MGI:1917673]
ENSMUSG00000032198	855.301	692.714	0.27893	0.0019991	0.018926	Dock6	protein_coding	dedicator of cytokinesis 6 [Source:MGI Symbol;Acc:MGI:1914789]
ENSMUSG00000028093	424.158	500.838	-0.22743	0.0020029	0.018949	Acp6	protein_coding	acid phosphatase 6, lysophosphatidic [Source:MGI Symbol;Acc:MGI:1931010]
ENSMUSG00000042251	195.349	246.527	-0.30155	0.0020077	0.018981	Pm20d1	protein_coding	peptidase M20 domain containing 1 [Source:MGI Symbol;Acc:MGI:2442939]
ENSMUSG00000072704	1408.75	1588.33	-0.16815	0.0020093	0.018983	2700089E24Rik	protein_coding	RIKEN cDNA 2700089E24 gene [Source:MGI Symbol;Acc:MGI:1914379]
ENSMUSG00000010607	284.667	346.623	-0.26378	0.0020136	0.01901	Pigyl	protein_coding	phosphatidylinositol glycan anchor biosynthesis, class Y-like [Source:MGI Symbol;Acc:MGI:1913518]
ENSMUSG00000031969	836.195	958.235	-0.19015	0.0020223	0.019079	Acad8	protein_coding	acyl-Coenzyme A dehydrogenase family, member 8 [Source:MGI Symbol;Acc:MGI:1914198]
ENSMUSG00000029512	1294.26	1504.24	-0.20714	0.0020287	0.019126	Ulk1	protein_coding	unc-51 like kinase 1 [Source:MGI Symbol;Acc:MGI:1270126]
ENSMUSG00000034799	68.103	42.6648	0.46489	0.002032	0.019138	Unc13a	protein_coding	unc-13 homolog A (C. elegans) [Source:MGI Symbol;Acc:MGI:3051532]
ENSMUSG00000041319	91.5778	120.679	-0.34436	0.0020328	0.019138	Thoc6	protein_coding	THO complex 6 homolog (Drosophila) [Source:MGI Symbol;Acc:MGI:2677480]
ENSMUSG00000068245	126.429	90.2697	0.39195	0.0020385	0.019179	Phf11d	protein_coding	PHD finger protein 11D [Source:MGI Symbol;Acc:MGI:1277133]
ENSMUSG00000024097	801.841	667.748	0.24846	0.0020439	0.019216	Srsf7	protein_coding	serine/arginine-rich splicing factor 7 [Source:MGI Symbol;Acc:MGI:1926232]
ENSMUSG00000039601	5865.42	6631.96	-0.17171	0.0020483	0.019244	Rcan2	protein_coding	regulator of calcineurin 2 [Source:MGI Symbol;Acc:MGI:1858219]
ENSMUSG00000001056	319.419	399.085	-0.29161	0.0020581	0.019322	Nhp2	protein_coding	NHP2 ribonucleoprotein [Source:MGI Symbol;Acc:MGI:1098547]
ENSMUSG00000073176	117.346	86.4286	0.36688	0.0020626	0.019325	Zfp449	protein_coding	zinc finger protein 449 [Source:MGI Symbol;Acc:MGI:1925869]
ENSMUSG00000021366	543.177	459.03	0.22838	0.0020612	0.019325	Hivep1	protein_coding	human immunodeficiency virus type I enhancer binding protein 1 [Source:MGI Symbol;Acc:MGI:96100]
ENSMUSG00000014606	9576.36	10971.5	-0.18895	0.0020625	0.019325	Slc25a11	protein_coding	solute carrier family 25 (mitochondrial carrier oxoglutarate carrier), member 11 [Source:MGI Symbol;Acc:MGI:1915113]
ENSMUSG00000028885	18.5057	32.4868	-0.48667	0.0020643	0.019326	Smpdl3b	protein_coding	sphingomyelin phosphodiesterase, acid-like 3B [Source:MGI Symbol;Acc:MGI:1916022]
ENSMUSG00000005373	228.507	160.951	0.40267	0.0020713	0.019379	Mlxipl	protein_coding	MLX interacting protein-like [Source:MGI Symbol;Acc:MGI:1927999]
ENSMUSG00000006304	2012.45	2220.34	-0.13937	0.0020775	0.019424	Arpc2	protein_coding	actin related protein 2/3 complex, subunit 2 [Source:MGI Symbol;Acc:MGI:1923959]
ENSMUSG00000029198	1584.27	1799.82	-0.17836	0.0020828	0.01946	Grpel1	protein_coding	GrpE-like 1, mitochondrial [Source:MGI Symbol;Acc:MGI:1334417]
ENSMUSG00000027332	8416.25	9430.45	-0.15985	0.0020888	0.019476	Ivd	protein_coding	isovaleryl coenzyme A dehydrogenase [Source:MGI Symbol;Acc:MGI:1929242]
ENSMUSG00000061474	1154.29	1318.72	-0.18469	0.0020874	0.019476	Mrps36	protein_coding	mitochondrial ribosomal protein S36 [Source:MGI Symbol;Acc:MGI:1913378]
ENSMUSG00000025204	2910.04	3621.74	-0.2868	0.0020868	0.019476	Ndufb8	protein_coding	NADH dehydrogenase (ubiquinone) 1 beta subcomplex 8 [Source:MGI Symbol;Acc:MGI:1914514]
ENSMUSG00000002068	11.0546	22.6707	-0.49528	0.0020958	0.019527	Ccne1	protein_coding	cyclin E1 [Source:MGI Symbol;Acc:MGI:88316]
ENSMUSG00000043411	451.367	376.096	0.24797	0.0021028	0.019579	Usp48	protein_coding	ubiquitin specific peptidase 48 [Source:MGI Symbol;Acc:MGI:2158502]
ENSMUSG00000054920	307.02	252.792	0.25931	0.0021078	0.019585	Klhl5	protein_coding	kelch-like 5 [Source:MGI Symbol;Acc:MGI:1919028]
ENSMUSG00000061979	636.364	754.055	-0.23129	0.0021075	0.019585	Wbscr16	protein_coding	Williams-Beuren syndrome chromosome region 16 homolog (human) [Source:MGI Symbol;Acc:MGI:2137600]
ENSMUSG00000029162	312.787	377.509	-0.25295	0.0021055	0.019585	Khk	protein_coding	ketohexokinase [Source:MGI Symbol;Acc:MGI:1096353]
ENSMUSG00000035049	22.2371	11.0239	0.49468	0.0021307	0.019719	Rrp12	protein_coding	ribosomal RNA processing 12 homolog (S. cerevisiae) [Source:MGI Symbol;Acc:MGI:2147437]
ENSMUSG00000001281	54.7177	29.7054	0.49125	0.0021309	0.019719	Itgb7	protein_coding	integrin beta 7 [Source:MGI Symbol;Acc:MGI:96616]
ENSMUSG00000059495	3091.66	2605.09	0.23277	0.0021307	0.019719	Arhgef12	protein_coding	Rho guanine nucleotide exchange factor (GEF) 12 [Source:MGI Symbol;Acc:MGI:1916882]
ENSMUSG00000055943	1111.93	1263.76	-0.17803	0.002131	0.019719	Emc7	protein_coding	ER membrane protein complex subunit 7 [Source:MGI Symbol;Acc:MGI:1920274]
ENSMUSG00000041236	668.715	767.114	-0.19108	0.0021274	0.019719	Vps41	protein_coding	vacuolar protein sorting 41 (yeast) [Source:MGI Symbol;Acc:MGI:1929215]
ENSMUSG00000063931	386.076	465.61	-0.25364	0.0021298	0.019719	Pepd	protein_coding	peptidase D [Source:MGI Symbol;Acc:MGI:97542]
ENSMUSG00000040829	52.6911	34.5896	0.44158	0.0021411	0.019774	Zmynd15	protein_coding	zinc finger, MYND-type containing 15 [Source:MGI Symbol;Acc:MGI:3603821]
ENSMUSG00000031065	2420.15	2745.98	-0.17673	0.002141	0.019774	Cdk16	protein_coding	cyclin-dependent kinase 16 [Source:MGI Symbol;Acc:MGI:97516]
ENSMUSG00000040485	17.2425	33.2663	-0.49369	0.0021413	0.019774	Lrrc52	protein_coding	leucine rich repeat containing 52 [Source:MGI Symbol;Acc:MGI:1924118]
ENSMUSG00000021188	822.961	652.258	0.30152	0.0021451	0.019795	Trip11	protein_coding	thyroid hormone receptor interactor 11 [Source:MGI Symbol;Acc:MGI:1924393]
ENSMUSG00000031429	174.517	215.762	-0.28041	0.0021472	0.019801	Psmd10	protein_coding	proteasome (prosome, macropain) 26S subunit, non-ATPase, 10 [Source:MGI Symbol;Acc:MGI:1858898]
ENSMUSG00000037826	1843.79	2069.5	-0.16218	0.0021543	0.019853	Ppm1k	protein_coding	protein phosphatase 1K (PP2C domain containing) [Source:MGI Symbol;Acc:MGI:2442111]
ENSMUSG00000031902	323.603	270.615	0.24183	0.0021671	0.019958	Nfatc3	protein_coding	nuclear factor of activated T cells, cytoplasmic, calcineurin dependent 3 [Source:MGI Symbol;Acc:MGI:103296]
ENSMUSG00000046070	82.6645	113.824	-0.38023	0.0021705	0.019975	Igfals	protein_coding	insulin-like growth factor binding protein, acid labile subunit [Source:MGI Symbol;Acc:MGI:107973]
ENSMUSG00000038732	37.5859	22.7319	0.47218	0.0021797	0.020046	Mboat1	protein_coding	membrane bound O-acyltransferase domain containing 1 [Source:MGI Symbol;Acc:MGI:2387184]
ENSMUSG00000039615	705.266	831.923	-0.22611	0.0021878	0.020106	Stub1	protein_coding	STIP1 homology and U-Box containing protein 1 [Source:MGI Symbol;Acc:MGI:1891731]
ENSMUSG00000054716	305.157	378.324	-0.28199	0.0021892	0.020106	Zfp771	protein_coding	zinc finger protein 771 [Source:MGI Symbol;Acc:MGI:2442050]
ENSMUSG00000079363	341.016	146.559	0.48385	0.0021933	0.02013	Gbp4	protein_coding	guanylate binding protein 4 [Source:MGI Symbol;Acc:MGI:97072]
ENSMUSG00000053719	10.3138	21.3543	-0.49284	0.0022001	0.020179	Klk1b26	protein_coding	kallikrein 1-related petidase b26 [Source:MGI Symbol;Acc:MGI:891981]
ENSMUSG00000028134	290.418	231.187	0.29706	0.0022027	0.020189	Ptbp2	protein_coding	polypyrimidine tract binding protein 2 [Source:MGI Symbol;Acc:MGI:1860489]
ENSMUSG00000040253	434.633	219.91	0.49294	0.0022087	0.02023	Gbp7	protein_coding	guanylate binding protein 7 [Source:MGI Symbol;Acc:MGI:2444421]
ENSMUSG00000032648	18534.9	20820.7	-0.16307	0.0022197	0.020317	Pygm	protein_coding	muscle glycogen phosphorylase [Source:MGI Symbol;Acc:MGI:97830]
ENSMUSG00000007035	16.0943	7.24462	0.48831	0.0022267	0.020367	Msh5	protein_coding	mutS homolog 5 (E. coli) [Source:MGI Symbol;Acc:MGI:1329021]
ENSMUSG00000044707	24.5359	12.3503	0.49247	0.0022306	0.020376	Ccnjl	protein_coding	cyclin J-like [Source:MGI Symbol;Acc:MGI:2685723]
ENSMUSG00000078941	149.251	191.178	-0.31392	0.0022303	0.020376	Ak6	protein_coding	adenylate kinase 6 [Source:MGI Symbol;Acc:MGI:5510732]
ENSMUSG00000065990	1514.56	1754.61	-0.20339	0.0022356	0.020408	Aurkaip1	protein_coding	aurora kinase A interacting protein 1 [Source:MGI Symbol;Acc:MGI:1913327]
ENSMUSG00000047466	281.16	224.985	0.29016	0.002239	0.020424	8030462N17Rik	protein_coding	RIKEN cDNA 8030462N17 gene [Source:MGI Symbol;Acc:MGI:2444951]
ENSMUSG00000062931	141.408	177.191	-0.29237	0.0022413	0.020432	Zfp938	protein_coding	zinc finger protein 938 [Source:MGI Symbol;Acc:MGI:3621440]
ENSMUSG00000004032	531.492	623.29	-0.21762	0.0022469	0.020469	Gstm5	protein_coding	glutathione S-transferase, mu 5 [Source:MGI Symbol;Acc:MGI:1309466]
ENSMUSG00000033220	103.686	56.3687	0.48846	0.00226	0.020572	Rac2	protein_coding	RAS-related C3 botulinum substrate 2 [Source:MGI Symbol;Acc:MGI:97846]
ENSMUSG00000044167	391.929	324.719	0.2514	0.0022613	0.020572	Foxo1	protein_coding	forkhead box O1 [Source:MGI Symbol;Acc:MGI:1890077]
ENSMUSG00000024962	5049.75	5762.38	-0.18365	0.002264	0.020583	Vegfb	protein_coding	vascular endothelial growth factor B [Source:MGI Symbol;Acc:MGI:106199]
ENSMUSG00000029826	339.079	278.466	0.26183	0.002269	0.020614	Zc3hav1	protein_coding	zinc finger CCCH type, antiviral 1 [Source:MGI Symbol;Acc:MGI:1926031]
ENSMUSG00000035142	213.408	258.41	-0.25867	0.0022725	0.020624	Nubpl	protein_coding	nucleotide binding protein-like [Source:MGI Symbol;Acc:MGI:1924076]
ENSMUSG00000049422	10261	12762.7	-0.28553	0.002273	0.020624	Chchd10	protein_coding	coiled-coil-helix-coiled-coil-helix domain containing 10 [Source:MGI Symbol;Acc:MGI:2143558]
ENSMUSG00000021520	6954.43	7945.33	-0.18519	0.0022901	0.020764	Uqcrb	protein_coding	ubiquinol-cytochrome c reductase binding protein [Source:MGI Symbol;Acc:MGI:1914780]
ENSMUSG00000074364	2256.37	1929.34	0.21472	0.0022923	0.02077	Ehd2	protein_coding	EH-domain containing 2 [Source:MGI Symbol;Acc:MGI:2154274]
ENSMUSG00000033170	676.938	567.55	0.23864	0.0022955	0.020786	Card10	protein_coding	caspase recruitment domain family, member 10 [Source:MGI Symbol;Acc:MGI:2146012]
ENSMUSG00000043065	125.638	94.9323	0.34739	0.0023032	0.020842	Spice1	protein_coding	spindle and centriole associated protein 1 [Source:MGI Symbol;Acc:MGI:1196252]
ENSMUSG00000030301	399.676	469.612	-0.22164	0.0023128	0.020914	Ccdc91	protein_coding	coiled-coil domain containing 91 [Source:MGI Symbol;Acc:MGI:1914265]
ENSMUSG00000032596	247.717	170.433	0.41471	0.0023181	0.020948	Uba7	protein_coding	ubiquitin-like modifier activating enzyme 7 [Source:MGI Symbol;Acc:MGI:1349462]
ENSMUSG00000028165	1152.99	1301.72	-0.16998	0.0023287	0.02103	Cisd2	protein_coding	CDGSH iron sulfur domain 2 [Source:MGI Symbol;Acc:MGI:1914256]
ENSMUSG00000036270	553.958	469.698	0.22445	0.002334	0.021036	Edc4	protein_coding	enhancer of mRNA decapping 4 [Source:MGI Symbol;Acc:MGI:2446249]
ENSMUSG00000024844	1179.73	1407.9	-0.23932	0.002331	0.021036	Banf1	protein_coding	barrier to autointegration factor 1 [Source:MGI Symbol;Acc:MGI:1346330]
ENSMUSG00000022671	204.413	257.363	-0.29873	0.0023336	0.021036	Mzt2	protein_coding	mitotic spindle organizing protein 2 [Source:MGI Symbol;Acc:MGI:1922845]
ENSMUSG00000019699	362.555	301.751	0.24841	0.0023479	0.021147	Akt3	protein_coding	thymoma viral proto-oncogene 3 [Source:MGI Symbol;Acc:MGI:1345147]
ENSMUSG00000071708	1033.31	1205.3	-0.21112	0.0023512	0.021162	Sms	protein_coding	spermine synthase [Source:MGI Symbol;Acc:MGI:109490]
ENSMUSG00000039682	1033.59	1173.5	-0.17699	0.0023562	0.021194	Lap3	protein_coding	leucine aminopeptidase 3 [Source:MGI Symbol;Acc:MGI:1914238]
ENSMUSG00000022376	12.1698	24.2416	-0.48976	0.0023591	0.021206	Adcy8	protein_coding	adenylate cyclase 8 [Source:MGI Symbol;Acc:MGI:1341110]
ENSMUSG00000050188	202.648	255.094	-0.2994	0.0023638	0.021233	Lsm10	protein_coding	U7 snRNP-specific Sm-like protein LSM10 [Source:MGI Symbol;Acc:MGI:2151045]
ENSMUSG00000001435	348.075	283.466	0.27076	0.0023717	0.02129	Col18a1	protein_coding	collagen, type XVIII, alpha 1 [Source:MGI Symbol;Acc:MGI:88451]
ENSMUSG00000074676	45.127	25.6157	0.48144	0.002378	0.021304	Foxs1	protein_coding	forkhead box S1 [Source:MGI Symbol;Acc:MGI:95546]
ENSMUSG00000010660	348.675	277.778	0.29587	0.0023754	0.021304	Plcd1	protein_coding	phospholipase C, delta 1 [Source:MGI Symbol;Acc:MGI:97614]
ENSMUSG00000029452	60.4085	83.8175	-0.38126	0.0023768	0.021304	Tmem116	protein_coding	transmembrane protein 116 [Source:MGI Symbol;Acc:MGI:1924712]
ENSMUSG00000091694	42.871	17.9787	0.47639	0.0023843	0.021335	Apol11b	protein_coding	apolipoprotein L 11b [Source:MGI Symbol;Acc:MGI:3036248]
ENSMUSG00000036246	90.6012	60.2849	0.435	0.0023846	0.021335	Gmip	protein_coding	Gem-interacting protein [Source:MGI Symbol;Acc:MGI:1926066]
ENSMUSG00000038793	23.8992	39.509	-0.46805	0.0023874	0.021346	Lefty1	protein_coding	left right determination factor 1 [Source:MGI Symbol;Acc:MGI:107405]
ENSMUSG00000052291	24.552	11.8542	0.48774	0.0023922	0.021365	5330438D12Rik	pseudogene	RIKEN cDNA 5330438D12 gene [Source:MGI Symbol;Acc:MGI:3026931]
ENSMUSG00000034235	265.534	337.902	-0.30888	0.0023927	0.021365	Usp54	protein_coding	ubiquitin specific peptidase 54 [Source:MGI Symbol;Acc:MGI:1926037]
ENSMUSG00000032334	963.202	775.263	0.28356	0.0023973	0.021378	Loxl1	protein_coding	lysyl oxidase-like 1 [Source:MGI Symbol;Acc:MGI:106096]
ENSMUSG00000035637	719.518	836.132	-0.20622	0.0023971	0.021378	Grhpr	protein_coding	glyoxylate reductase/hydroxypyruvate reductase [Source:MGI Symbol;Acc:MGI:1923488]
ENSMUSG00000029404	521.608	650.363	-0.28842	0.0024063	0.021444	Arl6ip4	protein_coding	ADP-ribosylation factor-like 6 interacting protein 4 [Source:MGI Symbol;Acc:MGI:1929500]
ENSMUSG00000005514	996.501	1205.12	-0.25364	0.0024156	0.021513	Por	protein_coding	P450 (cytochrome) oxidoreductase [Source:MGI Symbol;Acc:MGI:97744]
ENSMUSG00000039556	82.2917	111.885	-0.36675	0.0024204	0.021541	Ppp1r3f	protein_coding	protein phosphatase 1, regulatory (inhibitor) subunit 3F [Source:MGI Symbol;Acc:MGI:1859617]
ENSMUSG00000000276	369.626	287.678	0.31577	0.0024353	0.02166	Dgke	protein_coding	diacylglycerol kinase, epsilon [Source:MGI Symbol;Acc:MGI:1889276]
ENSMUSG00000032459	253.378	305.249	-0.25279	0.0024383	0.021672	Mrps22	protein_coding	mitochondrial ribosomal protein S22 [Source:MGI Symbol;Acc:MGI:1928137]
ENSMUSG00000018160	526.512	444.337	0.23202	0.0024527	0.021772	Med1	protein_coding	mediator complex subunit 1 [Source:MGI Symbol;Acc:MGI:1100846]
ENSMUSG00000028645	264.328	337.408	-0.31119	0.002452	0.021772	Slc2a1	protein_coding	solute carrier family 2 (facilitated glucose transporter), member 1 [Source:MGI Symbol;Acc:MGI:95755]
ENSMUSG00000079557	1219.79	1389.66	-0.18183	0.0024655	0.02187	2019-03-02	protein_coding	membrane-associated ring finger (C3HC4) 2 [Source:MGI Symbol;Acc:MGI:1925915]
ENSMUSG00000002781	2089.26	2406.33	-0.19578	0.0024681	0.021879	Tmem143	protein_coding	transmembrane protein 143 [Source:MGI Symbol;Acc:MGI:1917459]
ENSMUSG00000086938	217.679	156.907	0.38446	0.0024827	0.021994	4930481A15Rik	protein_coding	RIKEN cDNA 4930481A15 gene [Source:MGI Symbol;Acc:MGI:1922181]
ENSMUSG00000031820	664.491	765.033	-0.19486	0.0024896	0.022041	Babam1	protein_coding	BRISC and BRCA1 A complex member 1 [Source:MGI Symbol;Acc:MGI:1915501]
ENSMUSG00000023861	319.735	410.06	-0.31457	0.0024995	0.022114	Mpc1	protein_coding	mitochondrial pyruvate carrier 1 [Source:MGI Symbol;Acc:MGI:1915240]
ENSMUSG00000033020	1103.87	1278.63	-0.20174	0.0025121	0.022211	Polr2f	protein_coding	polymerase (RNA) II (DNA directed) polypeptide F [Source:MGI Symbol;Acc:MGI:1349393]
ENSMUSG00000078921	267.635	107.944	0.46839	0.0025169	0.022239	Tgtp2	protein_coding	T cell specific GTPase 2 [Source:MGI Symbol;Acc:MGI:3710083]
ENSMUSG00000041632	549.991	641.81	-0.21256	0.0025196	0.022249	Mrps27	protein_coding	mitochondrial ribosomal protein S27 [Source:MGI Symbol;Acc:MGI:1919064]
ENSMUSG00000068523	1411.22	1621.18	-0.19199	0.0025341	0.022362	Gng5	protein_coding	guanine nucleotide binding protein (G protein), gamma 5 [Source:MGI Symbol;Acc:MGI:109164]
ENSMUSG00000023104	289.484	339.936	-0.21882	0.0025437	0.022432	Rfc2	protein_coding	replication factor C (activator 1) 2 [Source:MGI Symbol;Acc:MGI:1341868]
ENSMUSG00000052446	102.655	69.5877	0.42253	0.0025497	0.022468	Zfp961	protein_coding	zinc finger protein 961 [Source:MGI Symbol;Acc:MGI:3583954]
ENSMUSG00000008450	574.011	659.831	-0.19375	0.0025511	0.022468	Nutf2	protein_coding	nuclear transport factor 2 [Source:MGI Symbol;Acc:MGI:1915301]
ENSMUSG00000042408	168.901	126.261	0.35688	0.002556	0.022479	Zmym6	protein_coding	zinc finger, MYM-type 6 [Source:MGI Symbol;Acc:MGI:106505]
ENSMUSG00000052310	861.313	987.393	-0.1909	0.0025541	0.022479	Slc39a1	protein_coding	solute carrier family 39 (zinc transporter), member 1 [Source:MGI Symbol;Acc:MGI:1353474]
ENSMUSG00000031641	625.561	749.053	-0.24234	0.0025574	0.022479	Cbr4	protein_coding	carbonyl reductase 4 [Source:MGI Symbol;Acc:MGI:2384567]
ENSMUSG00000034994	30589.8	35253.4	-0.19601	0.0025689	0.022566	Eef2	protein_coding	eukaryotic translation elongation factor 2 [Source:MGI Symbol;Acc:MGI:95288]
ENSMUSG00000046056	30.8525	17.1717	0.48072	0.002571	0.02257	Sbsn	protein_coding	suprabasin [Source:MGI Symbol;Acc:MGI:2446326]
ENSMUSG00000021814	1255.29	1414.02	-0.16662	0.0025764	0.022602	Anxa7	protein_coding	annexin A7 [Source:MGI Symbol;Acc:MGI:88031]
ENSMUSG00000021281	470.976	354.111	0.3483	0.0025789	0.022609	Tnfaip2	protein_coding	tumor necrosis factor, alpha-induced protein 2 [Source:MGI Symbol;Acc:MGI:104960]
ENSMUSG00000087260	588.209	679.036	-0.19769	0.0025843	0.022642	Lamtor5	protein_coding	late endosomal/lysosomal adaptor, MAPK and MTOR activator 5 [Source:MGI Symbol;Acc:MGI:1915826]
ENSMUSG00000037072	1491.31	1659.87	-0.14999	0.0025871	0.022652	2019-09-15	protein_coding	selenoprotein [Source:MGI Symbol;Acc:MGI:1927947]
ENSMUSG00000022412	408.315	348.019	0.21874	0.0025911	0.022672	Mief1	protein_coding	mitochondrial elongation factor 1 [Source:MGI Symbol;Acc:MGI:2146020]
ENSMUSG00000046275	133.39	73.9054	0.48091	0.0025986	0.022723	Tusc5	protein_coding	tumor suppressor candidate 5 [Source:MGI Symbol;Acc:MGI:3029307]
ENSMUSG00000037652	482.434	396.659	0.26243	0.0026138	0.022841	Phc3	protein_coding	polyhomeotic-like 3 (Drosophila) [Source:MGI Symbol;Acc:MGI:2181434]
ENSMUSG00000036333	1129.57	969.408	0.21046	0.0026198	0.022879	Kidins220	protein_coding	kinase D-interacting substrate 220 [Source:MGI Symbol;Acc:MGI:1924730]
ENSMUSG00000074749	983.205	1130.13	-0.19241	0.0026245	0.022905	Kiz	protein_coding	kizuna centrosomal protein [Source:MGI Symbol;Acc:MGI:2684960]
ENSMUSG00000068227	28.8965	10.3152	0.44825	0.0026366	0.022951	Il2rb	protein_coding	interleukin 2 receptor, beta chain [Source:MGI Symbol;Acc:MGI:96550]
ENSMUSG00000029778	153.919	117.987	0.32845	0.0026366	0.022951	Adcyap1r1	protein_coding	adenylate cyclase activating polypeptide 1 receptor 1 [Source:MGI Symbol;Acc:MGI:108449]
ENSMUSG00000053553	90.0702	125.642	-0.38927	0.0026358	0.022951	3110082I17Rik	protein_coding	RIKEN cDNA 3110082I17 gene [Source:MGI Symbol;Acc:MGI:1920462]
ENSMUSG00000037465	125.196	177.209	-0.39521	0.0026327	0.022951	Klf10	protein_coding	Kruppel-like factor 10 [Source:MGI Symbol;Acc:MGI:1101353]
ENSMUSG00000025958	442.744	354.988	0.2898	0.0026426	0.022959	Creb1	protein_coding	cAMP responsive element binding protein 1 [Source:MGI Symbol;Acc:MGI:88494]
ENSMUSG00000030035	990.499	1160.3	-0.21635	0.0026421	0.022959	Wbp1	protein_coding	WW domain binding protein 1 [Source:MGI Symbol;Acc:MGI:104710]
ENSMUSG00000086784	1024.23	1205.42	-0.22199	0.0026393	0.022959	Isoc2a	protein_coding	isochorismatase domain containing 2a [Source:MGI Symbol;Acc:MGI:3609243]
ENSMUSG00000005045	22.0279	11.2054	0.48369	0.0026692	0.023175	Chd5	protein_coding	chromodomain helicase DNA binding protein 5 [Source:MGI Symbol;Acc:MGI:3036258]
ENSMUSG00000041115	1051.51	1235.03	-0.2201	0.0026744	0.023205	Iqsec2	protein_coding	IQ motif and Sec7 domain 2 [Source:MGI Symbol;Acc:MGI:3528396]
ENSMUSG00000021957	649.151	339.518	0.48313	0.0026848	0.023236	Tkt	protein_coding	transketolase [Source:MGI Symbol;Acc:MGI:105992]
ENSMUSG00000067158	123.381	94.3439	0.33316	0.0026846	0.023236	Col4a4	protein_coding	collagen, type IV, alpha 4 [Source:MGI Symbol;Acc:MGI:104687]
ENSMUSG00000022150	413.203	339.485	0.25952	0.00268	0.023236	Dab2	protein_coding	disabled 2, mitogen-responsive phosphoprotein [Source:MGI Symbol;Acc:MGI:109175]
ENSMUSG00000029146	1169.36	1367.51	-0.21477	0.0026839	0.023236	Snx17	protein_coding	sorting nexin 17 [Source:MGI Symbol;Acc:MGI:2387801]
ENSMUSG00000000838	213.136	168.591	0.30303	0.0026958	0.023316	Fmr1	protein_coding	fragile X mental retardation syndrome 1 [Source:MGI Symbol;Acc:MGI:95564]
ENSMUSG00000026532	302.4	361.561	-0.24061	0.0026992	0.023331	Spta1	protein_coding	spectrin alpha, erythrocytic 1 [Source:MGI Symbol;Acc:MGI:98385]
ENSMUSG00000025078	281.787	211.287	0.35244	0.0027064	0.023349	Nhlrc2	protein_coding	NHL repeat containing 2 [Source:MGI Symbol;Acc:MGI:1914116]
ENSMUSG00000053877	693.616	613.477	0.17117	0.0027061	0.023349	Srcap	protein_coding	Snf2-related CREBBP activator protein [Source:MGI Symbol;Acc:MGI:2444036]
ENSMUSG00000020311	602.87	691.998	-0.19234	0.0027057	0.023349	Erlec1	protein_coding	endoplasmic reticulum lectin 1 [Source:MGI Symbol;Acc:MGI:1914003]
ENSMUSG00000044442	389.192	461.098	-0.23097	0.0027162	0.023418	N6amt1	protein_coding	N-6 adenine-specific DNA methyltransferase 1 (putative) [Source:MGI Symbol;Acc:MGI:1915018]
ENSMUSG00000009076	119.203	153.264	-0.31997	0.0027192	0.023418	Zmat5	protein_coding	zinc finger, matrin type 5 [Source:MGI Symbol;Acc:MGI:1914428]
ENSMUSG00000053560	246.588	357.015	-0.40908	0.0027197	0.023418	Ier2	protein_coding	immediate early response 2 [Source:MGI Symbol;Acc:MGI:104815]
ENSMUSG00000023456	13734.2	15522.2	-0.17092	0.0027249	0.023448	Tpi1	protein_coding	triosephosphate isomerase 1 [Source:MGI Symbol;Acc:MGI:98797]
ENSMUSG00000078920	91.2755	45.8927	0.48225	0.0027462	0.023577	Ifi47	protein_coding	interferon gamma inducible protein 47 [Source:MGI Symbol;Acc:MGI:99448]
ENSMUSG00000023994	349.738	291.517	0.24749	0.0027436	0.023577	Nfya	protein_coding	nuclear transcription factor-Y alpha [Source:MGI Symbol;Acc:MGI:97316]
ENSMUSG00000022723	728.882	615.887	0.22872	0.0027462	0.023577	Crybg3	protein_coding	beta-gamma crystallin domain containing 3 [Source:MGI Symbol;Acc:MGI:2676311]
ENSMUSG00000022634	392.191	459.227	-0.21652	0.002747	0.023577	Yaf2	protein_coding	YY1 associated factor 2 [Source:MGI Symbol;Acc:MGI:1914307]
ENSMUSG00000038508	33.5667	62.9737	-0.48109	0.0027486	0.023577	Gdf15	protein_coding	growth differentiation factor 15 [Source:MGI Symbol;Acc:MGI:1346047]
ENSMUSG00000032409	169.403	125.539	0.35955	0.0027615	0.023642	Atr	protein_coding	ataxia telangiectasia and Rad3 related [Source:MGI Symbol;Acc:MGI:108028]
ENSMUSG00000025745	29928.9	33270.7	-0.149	0.0027612	0.023642	Hadha	protein_coding	hydroxyacyl-Coenzyme A dehydrogenase/3-ketoacyl-Coenzyme A thiolase/enoyl-Coenzyme A hydratase (trifunctional protein), alpha subunit [Source:MGI Symbol;Acc:MGI:2135593]
ENSMUSG00000044197	1270.22	1448	-0.18221	0.0027593	0.023642	Gpr146	protein_coding	G protein-coupled receptor 146 [Source:MGI Symbol;Acc:MGI:1933113]
ENSMUSG00000028741	286.274	342.249	-0.24131	0.0027632	0.023642	Mrto4	protein_coding	MRT4, mRNA turnover 4, homolog (S. cerevisiae) [Source:MGI Symbol;Acc:MGI:1917152]
ENSMUSG00000029911	440.488	513.858	-0.21167	0.0027713	0.023696	Ssbp1	protein_coding	single-stranded DNA binding protein 1 [Source:MGI Symbol;Acc:MGI:1920040]
ENSMUSG00000033916	1496.35	1695.88	-0.17464	0.0027755	0.023718	Chmp2a	protein_coding	charged multivesicular body protein 2A [Source:MGI Symbol;Acc:MGI:1916203]
ENSMUSG00000102091	16.8822	7.37891	0.47266	0.002789	0.023817	Olfr1034	protein_coding	olfactory receptor 1034 [Source:MGI Symbol;Acc:MGI:3030868]
ENSMUSG00000047757	24.7487	13.6623	0.47695	0.0028121	0.024	Fancb	protein_coding	Fanconi anemia, complementation group B [Source:MGI Symbol;Acc:MGI:2448558]
ENSMUSG00000020477	1111.28	1293.25	-0.20876	0.0028155	0.024013	Mrps24	protein_coding	mitochondrial ribosomal protein S24 [Source:MGI Symbol;Acc:MGI:1928142]
ENSMUSG00000020056	275.145	327.454	-0.23664	0.0028266	0.024093	Ccdc53	protein_coding	coiled-coil domain containing 53 [Source:MGI Symbol;Acc:MGI:1914532]
ENSMUSG00000021256	131.96	99.3524	0.34479	0.002831	0.024115	Vash1	protein_coding	vasohibin 1 [Source:MGI Symbol;Acc:MGI:2442543]
ENSMUSG00000045667	246.424	317.957	-0.32187	0.0028363	0.024145	Smtnl2	protein_coding	smoothelin-like 2 [Source:MGI Symbol;Acc:MGI:2442764]
ENSMUSG00000017478	614.596	531.217	0.20142	0.0028388	0.024151	Zc3h18	protein_coding	zinc finger CCCH-type containing 18 [Source:MGI Symbol;Acc:MGI:1923264]
ENSMUSG00000024812	416.568	349.132	0.23768	0.0028449	0.024188	Tjp2	protein_coding	tight junction protein 2 [Source:MGI Symbol;Acc:MGI:1341872]
ENSMUSG00000033004	807.406	696.038	0.20498	0.0028473	0.024193	Mycbp2	protein_coding	MYC binding protein 2 [Source:MGI Symbol;Acc:MGI:2179432]
ENSMUSG00000055805	362.339	277.88	0.32967	0.002859	0.024262	Fmnl1	protein_coding	formin-like 1 [Source:MGI Symbol;Acc:MGI:1888994]
ENSMUSG00000024644	452.947	541.539	-0.24038	0.0028585	0.024262	Cndp2	protein_coding	CNDP dipeptidase 2 (metallopeptidase M20 family) [Source:MGI Symbol;Acc:MGI:1913304]
ENSMUSG00000020621	852.862	964.077	-0.17163	0.0028786	0.024413	Rdh14	protein_coding	retinol dehydrogenase 14 (all-trans and 9-cis) [Source:MGI Symbol;Acc:MGI:1920402]
ENSMUSG00000040524	450.071	372.528	0.25297	0.0028845	0.024448	Zfp609	protein_coding	zinc finger protein 609 [Source:MGI Symbol;Acc:MGI:2674092]
ENSMUSG00000028760	871.701	769.977	0.17345	0.0028928	0.024502	Eif4g3	protein_coding	eukaryotic translation initiation factor 4 gamma, 3 [Source:MGI Symbol;Acc:MGI:1923935]
ENSMUSG00000019848	469.548	394.512	0.2365	0.0028982	0.024533	Popdc3	protein_coding	popeye domain containing 3 [Source:MGI Symbol;Acc:MGI:1930153]
ENSMUSG00000020048	3156.83	2743.11	0.19419	0.0029144	0.024652	Hsp90b1	protein_coding	heat shock protein 90, beta (Grp94), member 1 [Source:MGI Symbol;Acc:MGI:98817]
ENSMUSG00000025940	1812.91	2040.63	-0.16572	0.0029159	0.024652	Tmem70	protein_coding	transmembrane protein 70 [Source:MGI Symbol;Acc:MGI:1915068]
ENSMUSG00000024483	628.104	519.035	0.25474	0.0029186	0.024659	Ankhd1	protein_coding	ankyrin repeat and KH domain containing 1 [Source:MGI Symbol;Acc:MGI:1921733]
ENSMUSG00000064264	180.673	239.367	-0.34539	0.0029321	0.024758	Zfp428	protein_coding	zinc finger protein 428 [Source:MGI Symbol;Acc:MGI:1916463]
ENSMUSG00000021748	12739	14034.8	-0.13691	0.0029392	0.024802	Pdhb	protein_coding	pyruvate dehydrogenase (lipoamide) beta [Source:MGI Symbol;Acc:MGI:1915513]
ENSMUSG00000046865	366.939	449.801	-0.26858	0.0029489	0.024869	Fbl	protein_coding	fibrillarin [Source:MGI Symbol;Acc:MGI:95486]
ENSMUSG00000074272	251.989	188.215	0.35514	0.0029615	0.024944	Ceacam1	protein_coding	carcinoembryonic antigen-related cell adhesion molecule 1 [Source:MGI Symbol;Acc:MGI:1347245]
ENSMUSG00000029434	416.288	488.104	-0.21944	0.0029599	0.024944	Vps33a	protein_coding	vacuolar protein sorting 33A (yeast) [Source:MGI Symbol;Acc:MGI:1924823]
ENSMUSG00000062866	1027.71	874.767	0.22067	0.0029725	0.025021	Phactr2	protein_coding	phosphatase and actin regulator 2 [Source:MGI Symbol;Acc:MGI:2446138]
ENSMUSG00000031200	38.3354	22.0656	0.47194	0.0029773	0.02503	Mtcp1	protein_coding	mature T cell proliferation 1 [Source:MGI Symbol;Acc:MGI:102699]
ENSMUSG00000028416	2933.18	3273.2	-0.154	0.0029768	0.02503	Bag1	protein_coding	BCL2-associated athanogene 1 [Source:MGI Symbol;Acc:MGI:108047]
ENSMUSG00000031447	5561.61	6118.69	-0.13485	0.0029863	0.02509	Lamp1	protein_coding	lysosomal-associated membrane protein 1 [Source:MGI Symbol;Acc:MGI:96745]
ENSMUSG00000072214	94.2594	67.0121	0.38827	0.0029938	0.025137	2019-09-05	protein_coding	septin 5 [Source:MGI Symbol;Acc:MGI:1195461]
ENSMUSG00000052336	51.3162	25.1965	0.47728	0.0030053	0.025157	Cx3cr1	protein_coding	chemokine (C-X3-C motif) receptor 1 [Source:MGI Symbol;Acc:MGI:1333815]
ENSMUSG00000093470	129.699	92.3805	0.39111	0.0030092	0.025157	Gm20645	lincRNA	predicted gene 20645 [Source:MGI Symbol;Acc:MGI:5313092]
ENSMUSG00000048076	4220.74	4634.61	-0.13248	0.0030046	0.025157	Arf1	protein_coding	ADP-ribosylation factor 1 [Source:MGI Symbol;Acc:MGI:99431]
ENSMUSG00000074884	4210.75	4810.56	-0.18471	0.0030079	0.025157	Serf2	protein_coding	small EDRK-rich factor 2 [Source:MGI Symbol;Acc:MGI:1337041]
ENSMUSG00000025499	853.982	986.474	-0.1991	0.0030057	0.025157	Hras	protein_coding	Harvey rat sarcoma virus oncogene [Source:MGI Symbol;Acc:MGI:96224]
ENSMUSG00000006941	763.591	884.254	-0.2011	0.0030082	0.025157	Eif1b	protein_coding	eukaryotic translation initiation factor 1B [Source:MGI Symbol;Acc:MGI:1916219]
ENSMUSG00000070394	1140.4	1385.6	-0.25859	0.0030049	0.025157	Tmem256	protein_coding	transmembrane protein 256 [Source:MGI Symbol;Acc:MGI:1916436]
ENSMUSG00000031519	364.925	440.317	-0.25342	0.0030136	0.025179	Asb5	protein_coding	ankyrin repeat and SOCs box-containing 5 [Source:MGI Symbol;Acc:MGI:1923544]
ENSMUSG00000038151	49.9581	23.3114	0.4743	0.0030226	0.025239	Prdm1	protein_coding	PR domain containing 1, with ZNF domain [Source:MGI Symbol;Acc:MGI:99655]
ENSMUSG00000061898	74.371	51.8295	0.39963	0.0030482	0.025436	Rbak	protein_coding	RB-associated KRAB repressor [Source:MGI Symbol;Acc:MGI:1927369]
ENSMUSG00000048537	2023.11	2304.58	-0.18139	0.0030552	0.025478	Phldb1	protein_coding	pleckstrin homology-like domain, family B, member 1 [Source:MGI Symbol;Acc:MGI:2143230]
ENSMUSG00000021607	518.655	607.19	-0.21649	0.0030577	0.025478	Mrpl36	protein_coding	mitochondrial ribosomal protein L36 [Source:MGI Symbol;Acc:MGI:2137228]
ENSMUSG00000043445	599.556	709.625	-0.23013	0.0030588	0.025478	Pgp	protein_coding	phosphoglycolate phosphatase [Source:MGI Symbol;Acc:MGI:1914328]
ENSMUSG00000017778	14267.5	16225.4	-0.17877	0.0030745	0.025593	Cox7c	protein_coding	cytochrome c oxidase subunit VIIc [Source:MGI Symbol;Acc:MGI:103226]
ENSMUSG00000001300	489.77	389.478	0.29388	0.0031078	0.025854	Efnb2	protein_coding	ephrin B2 [Source:MGI Symbol;Acc:MGI:105097]
ENSMUSG00000029462	627.77	727.673	-0.2019	0.0031116	0.025869	Vps29	protein_coding	vacuolar protein sorting 29 (S. pombe) [Source:MGI Symbol;Acc:MGI:1928344]
ENSMUSG00000022477	38225.2	42516	-0.14961	0.0031338	0.026022	Aco2	protein_coding	aconitase 2, mitochondrial [Source:MGI Symbol;Acc:MGI:87880]
ENSMUSG00000020326	9781.6	11600.7	-0.23064	0.0031338	0.026022	Ccng1	protein_coding	cyclin G1 [Source:MGI Symbol;Acc:MGI:102890]
ENSMUSG00000032348	1095.44	1223.86	-0.15543	0.0031444	0.026094	Gsta4	protein_coding	glutathione S-transferase, alpha 4 [Source:MGI Symbol;Acc:MGI:1309515]
ENSMUSG00000030257	33.4528	19.4379	0.46654	0.0031486	0.026112	Srgap3	protein_coding	SLIT-ROBO Rho GTPase activating protein 3 [Source:MGI Symbol;Acc:MGI:2152938]
ENSMUSG00000031295	229.682	279.052	-0.25657	0.0031596	0.026187	Phka2	protein_coding	phosphorylase kinase alpha 2 [Source:MGI Symbol;Acc:MGI:97577]
ENSMUSG00000042625	739.525	625.71	0.22824	0.0031626	0.026197	Safb2	protein_coding	scaffold attachment factor B2 [Source:MGI Symbol;Acc:MGI:2146808]
ENSMUSG00000045392	35.6586	18.3205	0.47513	0.0031759	0.026259	Olfr1033	protein_coding	olfactory receptor 1033 [Source:MGI Symbol;Acc:MGI:3030867]
ENSMUSG00000030830	74.8713	46.5602	0.44977	0.0031756	0.026259	Itgal	protein_coding	integrin alpha L [Source:MGI Symbol;Acc:MGI:96606]
ENSMUSG00000053332	533.227	450.968	0.22818	0.003176	0.026259	Gas5	processed_transcript	growth arrest specific 5 [Source:MGI Symbol;Acc:MGI:95659]
ENSMUSG00000034422	468.533	334.03	0.38626	0.0031834	0.026305	Parp14	protein_coding	poly (ADP-ribose) polymerase family, member 14 [Source:MGI Symbol;Acc:MGI:1919489]
ENSMUSG00000021737	990.906	1120	-0.17147	0.0031858	0.026308	Psmd6	protein_coding	proteasome (prosome, macropain) 26S subunit, non-ATPase, 6 [Source:MGI Symbol;Acc:MGI:1913663]
ENSMUSG00000039067	1766.14	1950.32	-0.14017	0.0031908	0.026333	Psmd7	protein_coding	proteasome (prosome, macropain) 26S subunit, non-ATPase, 7 [Source:MGI Symbol;Acc:MGI:1351511]
ENSMUSG00000037710	2633.95	2927.3	-0.14845	0.0032057	0.02644	Cisd1	protein_coding	CDGSH iron sulfur domain 1 [Source:MGI Symbol;Acc:MGI:1261855]
ENSMUSG00000032002	600.95	702.252	-0.21212	0.0032108	0.026466	Dcun1d5	protein_coding	DCN1, defective in cullin neddylation 1, domain containing 5 (S. cerevisiae) [Source:MGI Symbol;Acc:MGI:1924113]
ENSMUSG00000064356	149.978	195.917	-0.33377	0.0032181	0.02651	mt-Atp8	protein_coding	mitochondrially encoded ATP synthase 8 [Source:MGI Symbol;Acc:MGI:99926]
ENSMUSG00000004264	2344.45	2669.72	-0.18086	0.0032322	0.02661	Phb2	protein_coding	prohibitin 2 [Source:MGI Symbol;Acc:MGI:102520]
ENSMUSG00000028124	579.98	484.4	0.24301	0.0032364	0.026623	Gclm	protein_coding	glutamate-cysteine ligase, modifier subunit [Source:MGI Symbol;Acc:MGI:104995]
ENSMUSG00000037434	324.077	383.86	-0.23036	0.0032377	0.026623	Slc30a1	protein_coding	solute carrier family 30 (zinc transporter), member 1 [Source:MGI Symbol;Acc:MGI:1345281]
ENSMUSG00000001156	97.7136	126.287	-0.32152	0.0032469	0.026683	Mxd1	protein_coding	MAX dimerization protein 1 [Source:MGI Symbol;Acc:MGI:96908]
ENSMUSG00000026339	287.869	233.375	0.27552	0.0032566	0.026733	Ccdc93	protein_coding	coiled-coil domain containing 93 [Source:MGI Symbol;Acc:MGI:1918079]
ENSMUSG00000027130	341.795	290.56	0.22281	0.003257	0.026733	Slc12a6	protein_coding	solute carrier family 12, member 6 [Source:MGI Symbol;Acc:MGI:2135960]
ENSMUSG00000022962	682.021	769.161	-0.16847	0.0032596	0.026738	Gart	protein_coding	phosphoribosylglycinamide formyltransferase [Source:MGI Symbol;Acc:MGI:95654]
ENSMUSG00000049670	32.4885	50.0827	-0.43558	0.0032691	0.026799	Morn4	protein_coding	MORN repeat containing 4 [Source:MGI Symbol;Acc:MGI:2449568]
ENSMUSG00000039852	917.603	1059.23	-0.19777	0.0032905	0.026958	Rere	protein_coding	arginine glutamic acid dipeptide (RE) repeats [Source:MGI Symbol;Acc:MGI:2683486]
ENSMUSG00000071648	272.651	333.142	-0.26523	0.0032963	0.02699	Rom1	protein_coding	rod outer segment membrane protein 1 [Source:MGI Symbol;Acc:MGI:97998]
ENSMUSG00000033066	174.529	136.182	0.31428	0.0033099	0.027084	Gas7	protein_coding	growth arrest specific 7 [Source:MGI Symbol;Acc:MGI:1202388]
ENSMUSG00000060950	122.254	91.6399	0.34924	0.0033172	0.027128	Trmt61a	protein_coding	tRNA methyltransferase 61A [Source:MGI Symbol;Acc:MGI:2443487]
ENSMUSG00000005103	1648.36	1421.19	0.20373	0.003321	0.027142	Wdr1	protein_coding	WD repeat domain 1 [Source:MGI Symbol;Acc:MGI:1337100]
ENSMUSG00000055413	73.6373	38.9928	0.47258	0.0033267	0.027168	H2-Q5	polymorphic_pseudogene	histocompatibility 2, Q region locus 5 [Source:MGI Symbol;Acc:MGI:95934]
ENSMUSG00000027222	361.899	450.791	-0.2857	0.0033282	0.027168	Pex16	protein_coding	peroxisomal biogenesis factor 16 [Source:MGI Symbol;Acc:MGI:1338829]
ENSMUSG00000025486	784.044	907.748	-0.20288	0.0033326	0.027173	Sirt3	protein_coding	sirtuin 3 [Source:MGI Symbol;Acc:MGI:1927665]
ENSMUSG00000038208	199.112	245.857	-0.27793	0.0033327	0.027173	Pgap3	protein_coding	post-GPI attachment to proteins 3 [Source:MGI Symbol;Acc:MGI:2444461]
ENSMUSG00000048218	144.752	109.095	0.34842	0.0033395	0.027195	Amigo2	protein_coding	adhesion molecule with Ig like domain 2 [Source:MGI Symbol;Acc:MGI:2145995]
ENSMUSG00000051483	472.309	553.608	-0.21821	0.0033392	0.027195	Cbr1	protein_coding	carbonyl reductase 1 [Source:MGI Symbol;Acc:MGI:88284]
ENSMUSG00000025930	41.1955	19.9398	0.47084	0.0033466	0.027237	Msc	protein_coding	musculin [Source:MGI Symbol;Acc:MGI:1333884]
ENSMUSG00000027937	516.35	587.731	-0.179	0.0033507	0.027253	Jtb	protein_coding	jumping translocation breakpoint [Source:MGI Symbol;Acc:MGI:1346082]
ENSMUSG00000037149	1483.61	1643.05	-0.14434	0.003356	0.02728	Ddx1	protein_coding	DEAD (Asp-Glu-Ala-Asp) box polypeptide 1 [Source:MGI Symbol;Acc:MGI:2144727]
ENSMUSG00000040229	22.3504	10.8027	0.47099	0.0033589	0.027287	Gpr34	protein_coding	G protein-coupled receptor 34 [Source:MGI Symbol;Acc:MGI:1346334]
ENSMUSG00000002265	218.397	161.956	0.35977	0.0033739	0.027393	Peg3	protein_coding	paternally expressed 3 [Source:MGI Symbol;Acc:MGI:104748]
ENSMUSG00000035069	492.98	569.76	-0.20039	0.0033798	0.027424	Oma1	protein_coding	OMA1 homolog, zinc metallopeptidase (S. cerevisiae) [Source:MGI Symbol;Acc:MGI:1914263]
ENSMUSG00000041134	965.748	840.39	0.19081	0.0033879	0.027473	Cyyr1	protein_coding	cysteine and tyrosine-rich protein 1 [Source:MGI Symbol;Acc:MGI:2152187]
ENSMUSG00000030120	3751.68	4374.4	-0.21004	0.0034002	0.027556	Mlf2	protein_coding	myeloid leukemia factor 2 [Source:MGI Symbol;Acc:MGI:1353554]
ENSMUSG00000021143	783.484	665.26	0.22342	0.0034079	0.027603	Pacs2	protein_coding	phosphofurin acidic cluster sorting protein 2 [Source:MGI Symbol;Acc:MGI:1924399]
ENSMUSG00000024414	532.231	637.485	-0.24175	0.003422	0.0277	Mrpl27	protein_coding	mitochondrial ribosomal protein L27 [Source:MGI Symbol;Acc:MGI:2137224]
ENSMUSG00000074912	19.2922	9.90917	0.47132	0.0034296	0.027745	Gm14207	processed_transcript	predicted gene 14207 [Source:MGI Symbol;Acc:MGI:3649550]
ENSMUSG00000020629	692.385	786.895	-0.17827	0.0034375	0.027775	Adi1	protein_coding	acireductone dioxygenase 1 [Source:MGI Symbol;Acc:MGI:2144929]
ENSMUSG00000027962	453.079	562.774	-0.28117	0.0034367	0.027775	Vcam1	protein_coding	vascular cell adhesion molecule 1 [Source:MGI Symbol;Acc:MGI:98926]
ENSMUSG00000040037	60.6273	40.3423	0.42134	0.003445	0.027803	Negr1	protein_coding	neuronal growth regulator 1 [Source:MGI Symbol;Acc:MGI:2444846]
ENSMUSG00000040354	577.864	662.101	-0.18912	0.0034433	0.027803	Mars	protein_coding	methionine-tRNA synthetase [Source:MGI Symbol;Acc:MGI:1345633]
ENSMUSG00000038507	366.443	278.025	0.33759	0.0034857	0.028115	Parp12	protein_coding	poly (ADP-ribose) polymerase family, member 12 [Source:MGI Symbol;Acc:MGI:2143990]
ENSMUSG00000021483	77.1346	55.0569	0.38444	0.003488	0.028117	Cdk20	protein_coding	cyclin-dependent kinase 20 [Source:MGI Symbol;Acc:MGI:2145349]
ENSMUSG00000001521	165.276	129.006	0.31254	0.0034963	0.028166	Tulp3	protein_coding	tubby-like protein 3 [Source:MGI Symbol;Acc:MGI:1329045]
ENSMUSG00000038717	10347.9	11816.3	-0.18381	0.0035144	0.028295	Atp5l	protein_coding	ATP synthase, H+ transporting, mitochondrial F0 complex, subunit G [Source:MGI Symbol;Acc:MGI:1351597]
ENSMUSG00000000031	1210.77	896.76	0.35739	0.0035217	0.028337	H19	lincRNA	H19, imprinted maternally expressed transcript [Source:MGI Symbol;Acc:MGI:95891]
ENSMUSG00000057110	187.486	145.305	0.3205	0.0035245	0.028343	Cntrl	protein_coding	centriolin [Source:MGI Symbol;Acc:MGI:1889576]
ENSMUSG00000058833	751.018	889.433	-0.229	0.0035341	0.028403	2810428I15Rik	protein_coding	RIKEN cDNA 2810428I15 gene [Source:MGI Symbol;Acc:MGI:1913712]
ENSMUSG00000005687	743.642	832.691	-0.15808	0.0035386	0.028422	Bcas2	protein_coding	breast carcinoma amplified sequence 2 [Source:MGI Symbol;Acc:MGI:1915433]
ENSMUSG00000029482	132.955	62.8336	0.46551	0.0035504	0.028501	Aacs	protein_coding	acetoacetyl-CoA synthetase [Source:MGI Symbol;Acc:MGI:1926144]
ENSMUSG00000031637	20.6321	36.5441	-0.46567	0.0035533	0.028507	Lrp2bp	protein_coding	Lrp2 binding protein [Source:MGI Symbol;Acc:MGI:1914870]
ENSMUSG00000024121	3499.99	4045.94	-0.19927	0.0035701	0.028625	Atp6v0c	protein_coding	ATPase, H+ transporting, lysosomal V0 subunit C [Source:MGI Symbol;Acc:MGI:88116]
ENSMUSG00000052155	333.152	255.539	0.32715	0.0035771	0.028663	Acvr2a	protein_coding	activin receptor IIA [Source:MGI Symbol;Acc:MGI:102806]
ENSMUSG00000044364	76.5962	55.3712	0.37381	0.0035864	0.028692	Tmem74b	protein_coding	transmembrane protein 74B [Source:MGI Symbol;Acc:MGI:1918629]
ENSMUSG00000027559	1372.45	326.226	0.37246	0.0035862	0.028692	Car3	protein_coding	carbonic anhydrase 3 [Source:MGI Symbol;Acc:MGI:88270]
ENSMUSG00000054611	731.408	642.605	0.18099	0.0035871	0.028692	Kdm2a	protein_coding	lysine (K)-specific demethylase 2A [Source:MGI Symbol;Acc:MGI:1354736]
ENSMUSG00000028089	289.355	354.713	-0.26787	0.0036047	0.028799	Chd1l	protein_coding	chromodomain helicase DNA binding protein 1-like [Source:MGI Symbol;Acc:MGI:1915308]
ENSMUSG00000025277	135.244	167.722	-0.2783	0.0036031	0.028799	Abhd6	protein_coding	abhydrolase domain containing 6 [Source:MGI Symbol;Acc:MGI:1913332]
ENSMUSG00000079481	107.774	72.2085	0.42021	0.003613	0.028832	Nhsl2	protein_coding	NHS-like 2 [Source:MGI Symbol;Acc:MGI:3645090]
ENSMUSG00000059852	2610.83	3136.48	-0.24543	0.0036125	0.028832	Kcng2	protein_coding	potassium voltage-gated channel, subfamily G, member 2 [Source:MGI Symbol;Acc:MGI:3694646]
ENSMUSG00000019539	646.091	774.309	-0.24213	0.0036249	0.028909	Rcn3	protein_coding	reticulocalbin 3, EF-hand calcium binding domain [Source:MGI Symbol;Acc:MGI:1277122]
ENSMUSG00000043903	32.9689	16.1658	0.46657	0.0036344	0.028968	Gm22	lincRNA	predicted gene 22 [Source:MGI Symbol;Acc:MGI:2684868]
ENSMUSG00000020395	16.8236	6.86888	0.44874	0.0036376	0.02897	Itk	protein_coding	IL2 inducible T cell kinase [Source:MGI Symbol;Acc:MGI:96621]
ENSMUSG00000019947	159.188	108.006	0.41184	0.0036389	0.02897	Arid5b	protein_coding	AT rich interactive domain 5B (MRF1-like) [Source:MGI Symbol;Acc:MGI:2175912]
ENSMUSG00000079662	19.2838	32.2644	-0.45481	0.0036413	0.028972	Ntn3	protein_coding	netrin 3 [Source:MGI Symbol;Acc:MGI:1341188]
ENSMUSG00000034390	350.006	287.911	0.25842	0.0036442	0.028978	Cmip	protein_coding	c-Maf inducing protein [Source:MGI Symbol;Acc:MGI:1921690]
ENSMUSG00000031879	1016.83	1217	-0.24115	0.0036552	0.029048	Fam96b	protein_coding	family with sequence similarity 96, member B [Source:MGI Symbol;Acc:MGI:1915773]
ENSMUSG00000025410	1857.22	2083.04	-0.16065	0.0036892	0.029301	Dctn2	protein_coding	dynactin 2 [Source:MGI Symbol;Acc:MGI:107733]
ENSMUSG00000019966	1265.21	1093.4	0.20103	0.003703	0.029394	Kitl	protein_coding	kit ligand [Source:MGI Symbol;Acc:MGI:96974]
ENSMUSG00000038286	387.903	460.546	-0.23206	0.0037118	0.029446	Bphl	protein_coding	biphenyl hydrolase-like (serine hydrolase, breast epithelial mucin-associated antigen) [Source:MGI Symbol;Acc:MGI:1915271]
ENSMUSG00000038608	83.8714	60.2947	0.38108	0.0037236	0.029522	Dock10	protein_coding	dedicator of cytokinesis 10 [Source:MGI Symbol;Acc:MGI:2146320]
ENSMUSG00000042500	260.38	204.071	0.30796	0.003731	0.029564	Ago4	protein_coding	argonaute RISC catalytic subunit 4 [Source:MGI Symbol;Acc:MGI:1924100]
ENSMUSG00000045867	237.332	286.728	-0.25279	0.0037447	0.029654	Cradd	protein_coding	CASP2 and RIPK1 domain containing adaptor with death domain [Source:MGI Symbol;Acc:MGI:1336168]
ENSMUSG00000089769	37.8713	21.2184	0.46447	0.0037512	0.029689	Gm16574	pseudogene	predicted gene 16574 [Source:MGI Symbol;Acc:MGI:4414994]
ENSMUSG00000028643	347.162	407.559	-0.21786	0.0037563	0.029712	Ccdc23	protein_coding	coiled-coil domain containing 23 [Source:MGI Symbol;Acc:MGI:1916466]
ENSMUSG00000022756	40.483	59.1904	-0.41014	0.0037646	0.02976	Slc7a4	protein_coding	solute carrier family 7 (cationic amino acid transporter, y+ system), member 4 [Source:MGI Symbol;Acc:MGI:2146512]
ENSMUSG00000061100	164.753	103.747	0.4414	0.0037713	0.029778	Retnla	protein_coding	resistin like alpha [Source:MGI Symbol;Acc:MGI:1888504]
ENSMUSG00000055681	1680.68	1937.28	-0.19557	0.0037698	0.029778	Cope	protein_coding	coatomer protein complex, subunit epsilon [Source:MGI Symbol;Acc:MGI:1891702]
ENSMUSG00000078695	873.837	1031.39	-0.22391	0.0037925	0.029928	Cisd3	protein_coding	CDGSH iron sulfur domain 3 [Source:MGI Symbol;Acc:MGI:101788]
ENSMUSG00000036372	1146.77	1360.91	-0.23104	0.003803	0.029993	Tmem258	protein_coding	transmembrane protein 258 [Source:MGI Symbol;Acc:MGI:1916288]
ENSMUSG00000020611	527.444	442.788	0.23609	0.0038117	0.030045	Gna13	protein_coding	guanine nucleotide binding protein, alpha 13 [Source:MGI Symbol;Acc:MGI:95768]
ENSMUSG00000078185	23.761	12.2632	0.46587	0.0038224	0.030111	Chml	protein_coding	choroideremia-like [Source:MGI Symbol;Acc:MGI:101913]
ENSMUSG00000054823	469.249	392.365	0.24107	0.0038511	0.030302	Whsc1l1	protein_coding	Wolf-Hirschhorn syndrome candidate 1-like 1 (human) [Source:MGI Symbol;Acc:MGI:2142581]
ENSMUSG00000073676	1835.25	2243.22	-0.26372	0.0038488	0.030302	Hspe1	protein_coding	heat shock protein 1 (chaperonin 10) [Source:MGI Symbol;Acc:MGI:104680]
ENSMUSG00000022427	946.112	1057.1	-0.15563	0.0038572	0.030332	Tomm22	protein_coding	translocase of outer mitochondrial membrane 22 homolog (yeast) [Source:MGI Symbol;Acc:MGI:2450248]
ENSMUSG00000014243	187.295	233.918	-0.28843	0.0038651	0.030373	Zswim7	protein_coding	zinc finger SWIM-type containing 7 [Source:MGI Symbol;Acc:MGI:1916997]
ENSMUSG00000040857	537.967	685.037	-0.30611	0.0038669	0.030373	Erf	protein_coding	Ets2 repressor factor [Source:MGI Symbol;Acc:MGI:109637]
ENSMUSG00000008036	660.465	777.175	-0.22055	0.0038693	0.030374	Ap2s1	protein_coding	adaptor-related protein complex 2, sigma 1 subunit [Source:MGI Symbol;Acc:MGI:2141861]
ENSMUSG00000087331	45.0808	66.5788	-0.41083	0.0038737	0.030392	1810021B22Rik	processed_transcript	RIKEN cDNA 1810021B22 gene [Source:MGI Symbol;Acc:MGI:1916370]
ENSMUSG00000044937	46.7083	30.5619	0.42955	0.0038786	0.030394	BC030307	protein_coding	cDNA sequence BC030307 [Source:MGI Symbol;Acc:MGI:2387653]
ENSMUSG00000034574	1563.63	1213.2	0.31717	0.0038808	0.030394	Daam1	protein_coding	dishevelled associated activator of morphogenesis 1 [Source:MGI Symbol;Acc:MGI:1914596]
ENSMUSG00000095403	267.448	208.641	0.31253	0.0038803	0.030394	Gm21092	protein_coding	predicted gene, 21092 [Source:MGI Symbol;Acc:MGI:5434447]
ENSMUSG00000078427	791.832	898.196	-0.17476	0.0038856	0.030396	Sarnp	protein_coding	SAP domain containing ribonucleoprotein [Source:MGI Symbol;Acc:MGI:1913368]
ENSMUSG00000003072	10415.1	12005	-0.1955	0.0038844	0.030396	Atp5d	protein_coding	ATP synthase, H+ transporting, mitochondrial F1 complex, delta subunit [Source:MGI Symbol;Acc:MGI:1913293]
ENSMUSG00000028944	640.387	726.337	-0.17511	0.003892	0.030429	Prkag2	protein_coding	protein kinase, AMP-activated, gamma 2 non-catalytic subunit [Source:MGI Symbol;Acc:MGI:1336153]
ENSMUSG00000020821	11803.5	13215.7	-0.15825	0.0039034	0.0305	Kif1c	protein_coding	kinesin family member 1C [Source:MGI Symbol;Acc:MGI:1098260]
ENSMUSG00000063480	958.448	1105.28	-0.19634	0.0039308	0.030696	Nhp2l1	protein_coding	NHP2 non-histone chromosome protein 2-like 1 (S. cerevisiae) [Source:MGI Symbol;Acc:MGI:893586]
ENSMUSG00000028527	655.735	790.929	-0.25025	0.003934	0.030704	Ak4	protein_coding	adenylate kinase 4 [Source:MGI Symbol;Acc:MGI:87979]
ENSMUSG00000022443	1902.86	1695.67	0.16137	0.0039393	0.03071	Myh9	protein_coding	myosin, heavy polypeptide 9, non-muscle [Source:MGI Symbol;Acc:MGI:107717]
ENSMUSG00000054452	14265.2	16358.4	-0.18904	0.0039374	0.03071	Aes	protein_coding	amino-terminal enhancer of split [Source:MGI Symbol;Acc:MGI:95806]
ENSMUSG00000037475	429.162	347.925	0.27446	0.0039535	0.030803	Thoc2	protein_coding	THO complex 2 [Source:MGI Symbol;Acc:MGI:2442413]
ENSMUSG00000027774	2902.5	3234.76	-0.15226	0.0039631	0.03086	Gfm1	protein_coding	G elongation factor, mitochondrial 1 [Source:MGI Symbol;Acc:MGI:107339]
ENSMUSG00000047749	64.6852	44.5509	0.40208	0.0039671	0.030873	Zc3hav1l	protein_coding	zinc finger CCCH-type, antiviral 1-like [Source:MGI Symbol;Acc:MGI:2443387]
ENSMUSG00000057969	772.292	918.85	-0.23384	0.0039732	0.030903	Sema3b	protein_coding	sema domain, immunoglobulin domain (Ig), short basic domain, secreted, (semaphorin) 3B [Source:MGI Symbol;Acc:MGI:107561]
ENSMUSG00000068917	312.769	260.986	0.24315	0.0039787	0.030928	Clk2	protein_coding	CDC-like kinase 2 [Source:MGI Symbol;Acc:MGI:1098669]
ENSMUSG00000060227	183.106	234.858	-0.31242	0.0039836	0.030948	Casc4	protein_coding	cancer susceptibility candidate 4 [Source:MGI Symbol;Acc:MGI:2443129]
ENSMUSG00000062867	567.165	651.755	-0.19085	0.0039958	0.031023	Impdh2	protein_coding	inosine 5'-phosphate dehydrogenase 2 [Source:MGI Symbol;Acc:MGI:109367]
ENSMUSG00000037152	3704.16	4276.42	-0.19729	0.0039978	0.031023	Ndufc1	protein_coding	NADH dehydrogenase (ubiquinone) 1, subcomplex unknown, 1 [Source:MGI Symbol;Acc:MGI:1913627]
ENSMUSG00000005882	2715.5	3033.98	-0.15596	0.0040024	0.031041	Uqcc1	protein_coding	ubiquinol-cytochrome c reductase complex assembly factor 1 [Source:MGI Symbol;Acc:MGI:1929472]
ENSMUSG00000000378	369.538	439.693	-0.23249	0.0040188	0.03115	Ccm2	protein_coding	cerebral cavernous malformation 2 [Source:MGI Symbol;Acc:MGI:2384924]
ENSMUSG00000024359	13072.2	14273.4	-0.12453	0.0040309	0.031209	Hspa9	protein_coding	heat shock protein 9 [Source:MGI Symbol;Acc:MGI:96245]
ENSMUSG00000055493	587.448	680.439	-0.20296	0.004031	0.031209	Epm2a	protein_coding	epilepsy, progressive myoclonic epilepsy, type 2 gene alpha [Source:MGI Symbol;Acc:MGI:1341085]
ENSMUSG00000028700	978.64	1109.49	-0.17533	0.0040374	0.03124	Pomgnt1	protein_coding	protein O-linked mannose beta 1,2-N-acetylglucosaminyltransferase [Source:MGI Symbol;Acc:MGI:1915523]
ENSMUSG00000040840	27.5036	13.9648	0.46218	0.0040437	0.031271	4930579G18Rik	antisense	RIKEN cDNA 4930579G18 gene [Source:MGI Symbol;Acc:MGI:1923163]
ENSMUSG00000040661	281.359	236.981	0.23131	0.0040517	0.031315	Rad54l2	protein_coding	RAD54 like 2 (S. cerevisiae) [Source:MGI Symbol;Acc:MGI:1933196]
ENSMUSG00000003865	1272.95	1459.57	-0.18888	0.0040546	0.03132	Gys1	protein_coding	glycogen synthase 1, muscle [Source:MGI Symbol;Acc:MGI:101805]
ENSMUSG00000090272	262.101	194.281	0.35605	0.0040576	0.031324	Mndal	protein_coding	myeloid nuclear differentiation antigen like [Source:MGI Symbol;Acc:MGI:3780953]
ENSMUSG00000029142	1892.4	2106.56	-0.15017	0.0040749	0.03144	Mrpl33	protein_coding	mitochondrial ribosomal protein L33 [Source:MGI Symbol;Acc:MGI:2137225]
ENSMUSG00000029128	1314.98	1453.01	-0.14044	0.0040902	0.031522	Rab28	protein_coding	RAB28, member RAS oncogene family [Source:MGI Symbol;Acc:MGI:1917285]
ENSMUSG00000044285	37.0994	59.1737	-0.43842	0.0040897	0.031522	Gm1821	pseudogene	predicted gene 1821 [Source:MGI Symbol;Acc:MGI:3037679]
ENSMUSG00000067276	24.8456	11.8489	0.45718	0.0041058	0.0316	Capn6	protein_coding	calpain 6 [Source:MGI Symbol;Acc:MGI:1100850]
ENSMUSG00000020841	1234.69	1097.59	0.16371	0.0041027	0.0316	Cpd	protein_coding	carboxypeptidase D [Source:MGI Symbol;Acc:MGI:107265]
ENSMUSG00000040006	855.464	981.366	-0.18883	0.0041074	0.0316	Ginm1	protein_coding	glycoprotein integral membrane 1 [Source:MGI Symbol;Acc:MGI:2384905]
ENSMUSG00000021113	279.237	234.367	0.23646	0.0041238	0.031673	Snapc1	protein_coding	small nuclear RNA activating complex, polypeptide 1 [Source:MGI Symbol;Acc:MGI:1922877]
ENSMUSG00000057176	68.7114	95.3877	-0.37247	0.0041215	0.031673	Gm166	protein_coding	predicted gene 166 [Source:MGI Symbol;Acc:MGI:2685012]
ENSMUSG00000021260	16.0981	30.5241	-0.46192	0.0041226	0.031673	Hhipl1	protein_coding	hedgehog interacting protein-like 1 [Source:MGI Symbol;Acc:MGI:1919265]
ENSMUSG00000006906	188.139	229.814	-0.26319	0.004131	0.03171	Stambp	protein_coding	STAM binding protein [Source:MGI Symbol;Acc:MGI:1917777]
ENSMUSG00000015092	2254.85	2583.7	-0.18795	0.0041367	0.031736	Edf1	protein_coding	endothelial differentiation-related factor 1 [Source:MGI Symbol;Acc:MGI:1891227]
ENSMUSG00000066026	1365.75	1108.38	0.27285	0.0041582	0.031883	Dhrs3	protein_coding	dehydrogenase/reductase (SDR family) member 3 [Source:MGI Symbol;Acc:MGI:1315215]
ENSMUSG00000034729	399.582	475.668	-0.23436	0.0041611	0.031887	Mrps10	protein_coding	mitochondrial ribosomal protein S10 [Source:MGI Symbol;Acc:MGI:1928139]
ENSMUSG00000031840	651.987	773.73	-0.23147	0.0041789	0.032005	Rab3a	protein_coding	RAB3A, member RAS oncogene family [Source:MGI Symbol;Acc:MGI:97843]
ENSMUSG00000025451	1261.41	1397.06	-0.14361	0.0041858	0.032022	Paip1	protein_coding	polyadenylate binding protein-interacting protein 1 [Source:MGI Symbol;Acc:MGI:2384993]
ENSMUSG00000029038	360.091	419.416	-0.20906	0.0041857	0.032022	Ssu72	protein_coding	Ssu72 RNA polymerase II CTD phosphatase homolog (yeast) [Source:MGI Symbol;Acc:MGI:1916241]
ENSMUSG00000001280	582.379	505.222	0.19482	0.0041899	0.032035	Sp1	protein_coding	trans-acting transcription factor 1 [Source:MGI Symbol;Acc:MGI:98372]
ENSMUSG00000022537	170.933	134.363	0.30464	0.0042023	0.032093	Tmem44	protein_coding	transmembrane protein 44 [Source:MGI Symbol;Acc:MGI:1924489]
ENSMUSG00000038366	792.417	641.974	0.27477	0.0042001	0.032093	Lasp1	protein_coding	LIM and SH3 protein 1 [Source:MGI Symbol;Acc:MGI:109656]
ENSMUSG00000030879	782.942	907.365	-0.20306	0.004206	0.032103	Mrpl17	protein_coding	mitochondrial ribosomal protein L17 [Source:MGI Symbol;Acc:MGI:1351608]
ENSMUSG00000030785	29885.5	33882.9	-0.17439	0.0042129	0.032138	Cox6a2	protein_coding	cytochrome c oxidase subunit VIa polypeptide 2 [Source:MGI Symbol;Acc:MGI:104649]
ENSMUSG00000025949	170.486	135.247	0.29513	0.004218	0.032159	Pikfyve	protein_coding	phosphoinositide kinase, FYVE finger containing [Source:MGI Symbol;Acc:MGI:1335106]
ENSMUSG00000040270	86.9142	58.1307	0.41476	0.0042292	0.032213	Bach2	protein_coding	BTB and CNC homology 2 [Source:MGI Symbol;Acc:MGI:894679]
ENSMUSG00000075028	185.335	143.535	0.31823	0.0042319	0.032213	Prdm11	protein_coding	PR domain containing 11 [Source:MGI Symbol;Acc:MGI:2685553]
ENSMUSG00000021973	1899.21	2125.67	-0.15809	0.0042323	0.032213	Micu2	protein_coding	mitochondrial calcium uptake 2 [Source:MGI Symbol;Acc:MGI:1915764]
ENSMUSG00000074582	1015.23	837.975	0.25374	0.004247	0.032307	Arfgef2	protein_coding	ADP-ribosylation factor guanine nucleotide-exchange factor 2 (brefeldin A-inhibited) [Source:MGI Symbol;Acc:MGI:2139354]
ENSMUSG00000024073	946.727	806.077	0.21907	0.0042554	0.032353	Birc6	protein_coding	baculoviral IAP repeat-containing 6 [Source:MGI Symbol;Acc:MGI:1276108]
ENSMUSG00000027843	22.6012	11.1868	0.4588	0.0042678	0.032389	Ptpn22	protein_coding	protein tyrosine phosphatase, non-receptor type 22 (lymphoid) [Source:MGI Symbol;Acc:MGI:107170]
ENSMUSG00000031537	378.076	311.845	0.25733	0.0042668	0.032389	Ikbkb	protein_coding	inhibitor of kappaB kinase beta [Source:MGI Symbol;Acc:MGI:1338071]
ENSMUSG00000030615	840.747	952.561	-0.17332	0.0042698	0.032389	Tmem126a	protein_coding	transmembrane protein 126A [Source:MGI Symbol;Acc:MGI:1913521]
ENSMUSG00000034449	1761.36	2016.74	-0.18756	0.0042631	0.032389	Dhrs11	protein_coding	dehydrogenase/reductase (SDR family) member 11 [Source:MGI Symbol;Acc:MGI:2652816]
ENSMUSG00000024811	1479.25	1277.99	0.20127	0.0042857	0.032491	Tnks2	protein_coding	tankyrase, TRF1-interacting ankyrin-related ADP-ribose polymerase 2 [Source:MGI Symbol;Acc:MGI:1921743]
ENSMUSG00000037243	102.783	77.38	0.34343	0.0042882	0.032492	Zfp692	protein_coding	zinc finger protein 692 [Source:MGI Symbol;Acc:MGI:2144276]
ENSMUSG00000058267	798.433	929.434	-0.20757	0.0042912	0.032497	Mrps14	protein_coding	mitochondrial ribosomal protein S14 [Source:MGI Symbol;Acc:MGI:1928141]
ENSMUSG00000033487	265.449	223.018	0.235	0.0042994	0.032523	Fndc3a	protein_coding	fibronectin type III domain containing 3A [Source:MGI Symbol;Acc:MGI:1196463]
ENSMUSG00000027163	344.226	404.011	-0.2187	0.0042987	0.032523	Commd9	protein_coding	COMM domain containing 9 [Source:MGI Symbol;Acc:MGI:1923751]
ENSMUSG00000020475	8937.08	10315.5	-0.19697	0.0043115	0.032596	Pgam2	protein_coding	phosphoglycerate mutase 2 [Source:MGI Symbol;Acc:MGI:1933118]
ENSMUSG00000031683	350.59	420.383	-0.24171	0.0043207	0.032647	Lsm6	protein_coding	LSM6 homolog, U6 small nuclear RNA associated (S. cerevisiae) [Source:MGI Symbol;Acc:MGI:1925901]
ENSMUSG00000063801	541.245	616.842	-0.18224	0.0043238	0.032652	Ap3s2	protein_coding	adaptor-related protein complex 3, sigma 2 subunit [Source:MGI Symbol;Acc:MGI:1337060]
ENSMUSG00000031070	64.0129	40.2016	0.43585	0.0043482	0.032812	Mrgprf	protein_coding	MAS-related GPR, member F [Source:MGI Symbol;Acc:MGI:2384823]
ENSMUSG00000026473	6684.43	8774.17	-0.33185	0.0043499	0.032812	Glul	protein_coding	glutamate-ammonia ligase (glutamine synthetase) [Source:MGI Symbol;Acc:MGI:95739]
ENSMUSG00000079477	3037.7	3301.2	-0.11791	0.0043546	0.03283	Rab7	protein_coding	RAB7, member RAS oncogene family [Source:MGI Symbol;Acc:MGI:105068]
ENSMUSG00000024063	9681.12	12511.5	-0.31839	0.0043592	0.032846	Lbh	protein_coding	limb-bud and heart [Source:MGI Symbol;Acc:MGI:1925139]
ENSMUSG00000008140	1972.63	2302.65	-0.21114	0.0043689	0.032901	Emc10	protein_coding	ER membrane protein complex subunit 10 [Source:MGI Symbol;Acc:MGI:1916933]
ENSMUSG00000026639	360.324	435.063	-0.25173	0.0043818	0.03298	Lamb3	protein_coding	laminin, beta 3 [Source:MGI Symbol;Acc:MGI:99915]
ENSMUSG00000056917	654.263	524.421	0.28495	0.0043919	0.033037	Sipa1	protein_coding	signal-induced proliferation associated gene 1 [Source:MGI Symbol;Acc:MGI:107576]
ENSMUSG00000001741	110.51	77.2262	0.39202	0.0043972	0.033059	Il16	protein_coding	interleukin 16 [Source:MGI Symbol;Acc:MGI:1270855]
ENSMUSG00000005628	328.922	394.166	-0.24228	0.0044111	0.033144	Tmod4	protein_coding	tropomodulin 4 [Source:MGI Symbol;Acc:MGI:1355285]
ENSMUSG00000046607	23.3138	12.5524	0.45823	0.0044247	0.033228	Hrk	protein_coding	harakiri, BCL2 interacting protein (contains only BH3 domain) [Source:MGI Symbol;Acc:MGI:1201608]
ENSMUSG00000022841	2473.79	2755.54	-0.15117	0.0044321	0.033251	Ap2m1	protein_coding	adaptor-related protein complex 2, mu 1 subunit [Source:MGI Symbol;Acc:MGI:1298405]
ENSMUSG00000044067	652.796	793.817	-0.25909	0.0044327	0.033251	Gpr22	protein_coding	G protein-coupled receptor 22 [Source:MGI Symbol;Acc:MGI:1920260]
ENSMUSG00000067928	45.8372	27.5001	0.44722	0.0044355	0.033254	Zfp760	protein_coding	zinc finger protein 760 [Source:MGI Symbol;Acc:MGI:2679257]
ENSMUSG00000002845	152.314	120.45	0.30111	0.0044382	0.033256	Tmem39a	protein_coding	transmembrane protein 39a [Source:MGI Symbol;Acc:MGI:1915096]
ENSMUSG00000028444	141.511	181.871	-0.31043	0.0044521	0.033342	Cntfr	protein_coding	ciliary neurotrophic factor receptor [Source:MGI Symbol;Acc:MGI:99605]
ENSMUSG00000029998	1337.89	1488.35	-0.15005	0.0044597	0.03338	Pcyox1	protein_coding	prenylcysteine oxidase 1 [Source:MGI Symbol;Acc:MGI:1914131]
ENSMUSG00000059119	3299.23	3624.38	-0.13295	0.004473	0.033461	Nap1l4	protein_coding	nucleosome assembly protein 1-like 4 [Source:MGI Symbol;Acc:MGI:1316687]
ENSMUSG00000038000	152.12	186.678	-0.27043	0.0044773	0.033475	Acd	protein_coding	adrenocortical dysplasia [Source:MGI Symbol;Acc:MGI:87873]
ENSMUSG00000043909	359.304	301.592	0.23328	0.0044852	0.033481	Trp53bp1	protein_coding	transformation related protein 53 binding protein 1 [Source:MGI Symbol;Acc:MGI:1351320]
ENSMUSG00000022751	353.579	421.462	-0.23732	0.0044852	0.033481	Nit2	protein_coding	nitrilase family, member 2 [Source:MGI Symbol;Acc:MGI:1261838]
ENSMUSG00000078786	74.008	97.5873	-0.33479	0.0044856	0.033481	BC024978	protein_coding	cDNA sequence BC024978 [Source:MGI Symbol;Acc:MGI:3041247]
ENSMUSG00000099083	501.945	436.091	0.19392	0.0044897	0.033493	Atf7	protein_coding	activating transcription factor 7 [Source:MGI Symbol;Acc:MGI:2443472]
ENSMUSG00000071984	221.792	175.361	0.30034	0.0044957	0.033519	Fndc1	protein_coding	fibronectin type III domain containing 1 [Source:MGI Symbol;Acc:MGI:1915905]
ENSMUSG00000022305	83.4759	58.259	0.39216	0.0045091	0.033601	Lrp12	protein_coding	low density lipoprotein-related protein 12 [Source:MGI Symbol;Acc:MGI:2443132]
ENSMUSG00000036155	331.008	257.598	0.31404	0.0045243	0.033695	Mgat5	protein_coding	mannoside acetylglucosaminyltransferase 5 [Source:MGI Symbol;Acc:MGI:894701]
ENSMUSG00000042115	507.552	364.84	0.37395	0.0045302	0.03372	Klhdc8a	protein_coding	kelch domain containing 8A [Source:MGI Symbol;Acc:MGI:2442630]
ENSMUSG00000059741	92449.5	104757	-0.17356	0.0045386	0.033764	Myl3	protein_coding	myosin, light polypeptide 3 [Source:MGI Symbol;Acc:MGI:97268]
ENSMUSG00000032301	1315.61	1487.01	-0.17013	0.0045417	0.033769	Psma4	protein_coding	proteasome (prosome, macropain) subunit, alpha type 4 [Source:MGI Symbol;Acc:MGI:1347060]
ENSMUSG00000020647	566.73	452.129	0.28912	0.0045453	0.033777	Ncoa1	protein_coding	nuclear receptor coactivator 1 [Source:MGI Symbol;Acc:MGI:1276523]
ENSMUSG00000036403	90.8081	67.0431	0.35971	0.0045517	0.033806	Cep135	protein_coding	centrosomal protein 135 [Source:MGI Symbol;Acc:MGI:2681869]
ENSMUSG00000041765	513.534	583.698	-0.17829	0.0045567	0.033825	Ubac2	protein_coding	ubiquitin associated domain containing 2 [Source:MGI Symbol;Acc:MGI:1916139]
ENSMUSG00000028676	907.306	730.476	0.28117	0.0045614	0.033841	Srsf10	protein_coding	serine/arginine-rich splicing factor 10 [Source:MGI Symbol;Acc:MGI:1333805]
ENSMUSG00000035236	107.993	80.0707	0.35481	0.004573	0.033852	Scai	protein_coding	suppressor of cancer cell invasion [Source:MGI Symbol;Acc:MGI:2443716]
ENSMUSG00000027652	725.9	621.879	0.21084	0.0045665	0.033852	Ralgapb	protein_coding	Ral GTPase activating protein, beta subunit (non-catalytic) [Source:MGI Symbol;Acc:MGI:2444531]
ENSMUSG00000020547	2344.91	2636.87	-0.16393	0.0045774	0.033852	Bzw2	protein_coding	basic leucine zipper and W2 domains 2 [Source:MGI Symbol;Acc:MGI:1914162]
ENSMUSG00000031913	912.469	1025.91	-0.16414	0.0045719	0.033852	Vps4a	protein_coding	vacuolar protein sorting 4a (yeast) [Source:MGI Symbol;Acc:MGI:1890520]
ENSMUSG00000028969	300.164	361.993	-0.24679	0.0045779	0.033852	Cdk5	protein_coding	cyclin-dependent kinase 5 [Source:MGI Symbol;Acc:MGI:101765]
ENSMUSG00000030688	2003.88	2447.34	-0.262	0.0045727	0.033852	Stard10	protein_coding	START domain containing 10 [Source:MGI Symbol;Acc:MGI:1860093]
ENSMUSG00000051335	765.628	631.19	0.25576	0.0045845	0.033882	Gfod1	protein_coding	glucose-fructose oxidoreductase domain containing 1 [Source:MGI Symbol;Acc:MGI:2145304]
ENSMUSG00000044098	115.836	84.2803	0.36546	0.0045884	0.033892	Rsbn1	protein_coding	rosbin, round spermatid basic protein 1 [Source:MGI Symbol;Acc:MGI:2444993]
ENSMUSG00000080316	82.6504	47.962	0.45176	0.0045924	0.033903	Spaca6	protein_coding	sperm acrosome associated 6 [Source:MGI Symbol;Acc:MGI:1922452]
ENSMUSG00000017548	450.856	383.708	0.21784	0.0046165	0.034063	Suz12	protein_coding	suppressor of zeste 12 homolog (Drosophila) [Source:MGI Symbol;Acc:MGI:1261758]
ENSMUSG00000020653	157.33	207.792	-0.33676	0.0046256	0.034111	Klf11	protein_coding	Kruppel-like factor 11 [Source:MGI Symbol;Acc:MGI:2653368]
ENSMUSG00000022685	212.086	256.454	-0.24988	0.0046506	0.034277	Parn	protein_coding	poly(A)-specific ribonuclease (deadenylation nuclease) [Source:MGI Symbol;Acc:MGI:1921358]
ENSMUSG00000022820	3720.08	4424.2	-0.2326	0.0046535	0.034279	Ndufb4	protein_coding	NADH dehydrogenase (ubiquinone) 1 beta subcomplex 4 [Source:MGI Symbol;Acc:MGI:1915444]
ENSMUSG00000046079	210.652	164.382	0.30815	0.0046563	0.034282	Lrrc8d	protein_coding	leucine rich repeat containing 8D [Source:MGI Symbol;Acc:MGI:1922368]
ENSMUSG00000054720	542.371	419.057	0.31999	0.0046608	0.034296	Lrrc8c	protein_coding	leucine rich repeat containing 8 family, member C [Source:MGI Symbol;Acc:MGI:2140839]
ENSMUSG00000024352	94.4684	122.036	-0.3196	0.0046645	0.034305	Spata24	protein_coding	spermatogenesis associated 24 [Source:MGI Symbol;Acc:MGI:1918492]
ENSMUSG00000015806	1070.31	1198.95	-0.15861	0.0046719	0.03434	Qdpr	protein_coding	quinoid dihydropteridine reductase [Source:MGI Symbol;Acc:MGI:97836]
ENSMUSG00000023330	73.3872	99.736	-0.35711	0.0046788	0.034372	Dtwd1	protein_coding	DTW domain containing 1 [Source:MGI Symbol;Acc:MGI:1916435]
ENSMUSG00000035757	111.54	141.412	-0.3006	0.0046861	0.034407	Selo	protein_coding	selenoprotein O [Source:MGI Symbol;Acc:MGI:1919007]
ENSMUSG00000048503	142.136	112.566	0.29637	0.0047129	0.034572	Tmem136	protein_coding	transmembrane protein 136 [Source:MGI Symbol;Acc:MGI:2685030]
ENSMUSG00000026189	150.462	185.612	-0.27391	0.0047136	0.034572	Pecr	protein_coding	peroxisomal trans-2-enoyl-CoA reductase [Source:MGI Symbol;Acc:MGI:2148199]
ENSMUSG00000040502	144.245	195.188	-0.35694	0.0047211	0.034608	2019-03-09	protein_coding	membrane-associated ring finger (C3HC4) 9 [Source:MGI Symbol;Acc:MGI:2446144]
ENSMUSG00000022225	41.6925	25.1559	0.4445	0.0047429	0.034713	Cma1	protein_coding	chymase 1, mast cell [Source:MGI Symbol;Acc:MGI:96941]
ENSMUSG00000021939	7161.38	7907.19	-0.13949	0.0047431	0.034713	Ctsb	protein_coding	cathepsin B [Source:MGI Symbol;Acc:MGI:88561]
ENSMUSG00000068267	3751.45	4281.08	-0.18276	0.0047424	0.034713	Cenpb	protein_coding	centromere protein B [Source:MGI Symbol;Acc:MGI:88376]
ENSMUSG00000024091	1266.15	1145.51	0.13973	0.0047475	0.034726	Vapa	protein_coding	vesicle-associated membrane protein, associated protein A [Source:MGI Symbol;Acc:MGI:1353561]
ENSMUSG00000043384	494.788	407.047	0.25793	0.0047695	0.034868	Gprasp1	protein_coding	G protein-coupled receptor associated sorting protein 1 [Source:MGI Symbol;Acc:MGI:1917418]
ENSMUSG00000002205	292.732	343.248	-0.21615	0.0048028	0.035093	Vrk3	protein_coding	vaccinia related kinase 3 [Source:MGI Symbol;Acc:MGI:2182465]
ENSMUSG00000034820	471.722	408.577	0.19851	0.0048157	0.035149	Cpsf7	protein_coding	cleavage and polyadenylation specific factor 7 [Source:MGI Symbol;Acc:MGI:1917826]
ENSMUSG00000024963	496.835	591.881	-0.2354	0.0048133	0.035149	Dnajc4	protein_coding	DnaJ (Hsp40) homolog, subfamily C, member 4 [Source:MGI Symbol;Acc:MGI:1927346]
ENSMUSG00000053897	175.752	140.36	0.28882	0.0048301	0.035218	Slc39a8	protein_coding	solute carrier family 39 (metal ion transporter), member 8 [Source:MGI Symbol;Acc:MGI:1914797]
ENSMUSG00000042772	705.351	619.458	0.18034	0.0048304	0.035218	Smg7	protein_coding	Smg-7 homolog, nonsense mediated mRNA decay factor (C. elegans) [Source:MGI Symbol;Acc:MGI:2682334]
ENSMUSG00000020440	1367.92	1618.13	-0.22643	0.0048394	0.035264	Arf5	protein_coding	ADP-ribosylation factor 5 [Source:MGI Symbol;Acc:MGI:99434]
ENSMUSG00000016833	465.158	543.82	-0.21217	0.0048698	0.035467	Mrps18c	protein_coding	mitochondrial ribosomal protein S18C [Source:MGI Symbol;Acc:MGI:1915985]
ENSMUSG00000029291	117.052	153.329	-0.32969	0.0048893	0.03559	Rufy3	protein_coding	RUN and FYVE domain containing 3 [Source:MGI Symbol;Acc:MGI:106484]
ENSMUSG00000021943	59.5198	94.7128	-0.43363	0.0048954	0.035615	Gdf10	protein_coding	growth differentiation factor 10 [Source:MGI Symbol;Acc:MGI:95684]
ENSMUSG00000074183	135.304	92.4339	0.40245	0.0048993	0.035623	Gsta1	protein_coding	glutathione S-transferase, alpha 1 (Ya) [Source:MGI Symbol;Acc:MGI:1095417]
ENSMUSG00000022095	444.882	515.669	-0.20323	0.0049018	0.035623	Fam160b2	protein_coding	family with sequence similarity 160, member B2 [Source:MGI Symbol;Acc:MGI:3036290]
ENSMUSG00000074733	159.658	107.562	0.40973	0.0049099	0.035663	5830428H23Rik	processed_transcript	RIKEN cDNA 5830428H23 gene [Source:MGI Symbol;Acc:MGI:1926073]
ENSMUSG00000031849	249.964	188.314	0.33994	0.0049299	0.035789	Comp	protein_coding	cartilage oligomeric matrix protein [Source:MGI Symbol;Acc:MGI:88469]
ENSMUSG00000095332	60.0071	32.1797	0.45257	0.0049561	0.03594	Gm9821	protein_coding	predicted gene 9821 [Source:MGI Symbol;Acc:MGI:3704208]
ENSMUSG00000028683	188.689	226.089	-0.23991	0.0049534	0.03594	Eif2b3	protein_coding	eukaryotic translation initiation factor 2B, subunit 3 [Source:MGI Symbol;Acc:MGI:1313286]
ENSMUSG00000047921	637.342	734.48	-0.19364	0.0049623	0.035966	Trappc9	protein_coding	trafficking protein particle complex 9 [Source:MGI Symbol;Acc:MGI:1923760]
ENSMUSG00000059201	44.3477	6.71017	0.31014	0.0049752	0.035982	Lep	protein_coding	leptin [Source:MGI Symbol;Acc:MGI:104663]
ENSMUSG00000021577	31076.7	34341.1	-0.14058	0.0049744	0.035982	Sdha	protein_coding	succinate dehydrogenase complex, subunit A, flavoprotein (Fp) [Source:MGI Symbol;Acc:MGI:1914195]
ENSMUSG00000030029	693.291	818.167	-0.22391	0.0049747	0.035982	Lrig1	protein_coding	leucine-rich repeats and immunoglobulin-like domains 1 [Source:MGI Symbol;Acc:MGI:107935]
ENSMUSG00000032501	357.106	479.025	-0.34732	0.0049721	0.035982	Trib1	protein_coding	tribbles homolog 1 (Drosophila) [Source:MGI Symbol;Acc:MGI:2443397]
ENSMUSG00000074807	87.006	117.346	-0.35408	0.0049885	0.036059	Gm10762	protein_coding	predicted gene 10762 [Source:MGI Symbol;Acc:MGI:3704209]
ENSMUSG00000031841	2684.42	2917.51	-0.11789	0.0049913	0.03606	Cdh13	protein_coding	cadherin 13 [Source:MGI Symbol;Acc:MGI:99551]
ENSMUSG00000035696	379.483	318.937	0.23232	0.0050147	0.03621	Rnf38	protein_coding	ring finger protein 38 [Source:MGI Symbol;Acc:MGI:1920719]
ENSMUSG00000024845	1768.03	2057.05	-0.20683	0.0050454	0.036412	Tmem134	processed_transcript	transmembrane protein 134 [Source:MGI Symbol;Acc:MGI:1914240]
ENSMUSG00000022016	713.483	597.035	0.23746	0.0050621	0.036513	Akap11	protein_coding	A kinase (PRKA) anchor protein 11 [Source:MGI Symbol;Acc:MGI:2684060]
ENSMUSG00000001558	16.5702	7.71999	0.44403	0.0050653	0.036517	Klhl10	protein_coding	kelch-like 10 [Source:MGI Symbol;Acc:MGI:2181067]
ENSMUSG00000049502	280.676	206.65	0.35608	0.0050725	0.036549	Dtx3l	protein_coding	deltex 3-like (Drosophila) [Source:MGI Symbol;Acc:MGI:2656973]
ENSMUSG00000070034	98.842	71.5186	0.37053	0.0050793	0.036579	Sp110	protein_coding	Sp110 nuclear body protein [Source:MGI Symbol;Acc:MGI:1923364]
ENSMUSG00000092558	230.531	183.307	0.29344	0.0050897	0.036634	Med20	protein_coding	mediator complex subunit 20 [Source:MGI Symbol;Acc:MGI:1929648]
ENSMUSG00000024846	63.2946	85.3935	-0.35065	0.0051026	0.036707	Cst6	protein_coding	cystatin E/M [Source:MGI Symbol;Acc:MGI:1920970]
ENSMUSG00000020198	1080.09	933.431	0.1999	0.0051256	0.036838	Ap3d1	protein_coding	adaptor-related protein complex 3, delta 1 subunit [Source:MGI Symbol;Acc:MGI:107734]
ENSMUSG00000022677	639.125	744.704	-0.20836	0.0051263	0.036838	Fopnl	protein_coding	Fgfr1op N-terminal like [Source:MGI Symbol;Acc:MGI:1913336]
ENSMUSG00000025066	1366.65	1510.89	-0.14158	0.0051299	0.036844	Sfr1	protein_coding	SWI5 dependent recombination repair 1 [Source:MGI Symbol;Acc:MGI:1915038]
ENSMUSG00000024191	303.201	250.711	0.25116	0.005143	0.036919	Bnip1	protein_coding	BCL2/adenovirus E1B interacting protein 1 [Source:MGI Symbol;Acc:MGI:109328]
ENSMUSG00000016252	10309.5	12293.4	-0.23526	0.0051488	0.036941	Atp5e	protein_coding	ATP synthase, H+ transporting, mitochondrial F1 complex, epsilon subunit [Source:MGI Symbol;Acc:MGI:1855697]
ENSMUSG00000073555	36.3804	17.0942	0.444	0.0051744	0.037105	Gm4951	protein_coding	predicted gene 4951 [Source:MGI Symbol;Acc:MGI:3644953]
ENSMUSG00000073902	15.232	6.84139	0.43849	0.0051857	0.037128	Gm1966	pseudogene	predicted gene 1966 [Source:MGI Symbol;Acc:MGI:3584360]
ENSMUSG00000024999	142.417	113.049	0.2955	0.0051836	0.037128	Noc3l	protein_coding	nucleolar complex associated 3 homolog (S. cerevisiae) [Source:MGI Symbol;Acc:MGI:1932610]
ENSMUSG00000039263	1584.58	1816.69	-0.18885	0.0051858	0.037128	Npepl1	protein_coding	aminopeptidase-like 1 [Source:MGI Symbol;Acc:MGI:2448523]
ENSMUSG00000032374	427.745	507.685	-0.22898	0.0052093	0.037276	Plod2	protein_coding	procollagen lysine, 2-oxoglutarate 5-dioxygenase 2 [Source:MGI Symbol;Acc:MGI:1347007]
ENSMUSG00000038540	21.0099	10.2457	0.4477	0.0052158	0.037284	Tmc3	protein_coding	transmembrane channel-like gene family 3 [Source:MGI Symbol;Acc:MGI:2669033]
ENSMUSG00000026979	26.3933	11.9494	0.4382	0.0052308	0.037284	Psd4	protein_coding	pleckstrin and Sec7 domain containing 4 [Source:MGI Symbol;Acc:MGI:2674093]
ENSMUSG00000062031	113.785	87.4873	0.3205	0.0052266	0.037284	Athl1	protein_coding	ATH1, acid trehalase-like 1 (yeast) [Source:MGI Symbol;Acc:MGI:2444047]
ENSMUSG00000002028	703.786	548.337	0.31137	0.0052264	0.037284	Kmt2a	protein_coding	lysine (K)-specific methyltransferase 2A [Source:MGI Symbol;Acc:MGI:96995]
ENSMUSG00000016477	149.864	118.323	0.29529	0.0052336	0.037284	E2f3	protein_coding	E2F transcription factor 3 [Source:MGI Symbol;Acc:MGI:1096340]
ENSMUSG00000032349	542.263	445.321	0.25983	0.005236	0.037284	Elovl5	protein_coding	ELOVL family member 5, elongation of long chain fatty acids (yeast) [Source:MGI Symbol;Acc:MGI:1916051]
ENSMUSG00000025171	326.185	273.483	0.23387	0.0052384	0.037284	Ubtd1	protein_coding	ubiquitin domain containing 1 [Source:MGI Symbol;Acc:MGI:2385092]
ENSMUSG00000078713	1532.62	1762.73	-0.19202	0.0052294	0.037284	Tomm5	protein_coding	translocase of outer mitochondrial membrane 5 homolog (yeast) [Source:MGI Symbol;Acc:MGI:1915762]
ENSMUSG00000050043	1079.4	1259.81	-0.2102	0.005234	0.037284	Tmx2	protein_coding	thioredoxin-related transmembrane protein 2 [Source:MGI Symbol;Acc:MGI:1914208]
ENSMUSG00000035215	464.251	552.828	-0.23309	0.005229	0.037284	Lsm7	protein_coding	LSM7 homolog, U6 small nuclear RNA associated (S. cerevisiae) [Source:MGI Symbol;Acc:MGI:1913344]
ENSMUSG00000031807	601.733	744.647	-0.27561	0.0052407	0.037284	Pgls	protein_coding	6-phosphogluconolactonase [Source:MGI Symbol;Acc:MGI:1913421]
ENSMUSG00000022623	1055.9	859.476	0.26801	0.0052668	0.03739	Shank3	protein_coding	SH3/ankyrin domain gene 3 [Source:MGI Symbol;Acc:MGI:1930016]
ENSMUSG00000031667	835.305	933.977	-0.15604	0.0052722	0.03739	Aktip	protein_coding	thymoma viral proto-oncogene 1 interacting protein [Source:MGI Symbol;Acc:MGI:3693832]
ENSMUSG00000021096	2501.25	2815.99	-0.1655	0.0052634	0.03739	Ppm1a	protein_coding	protein phosphatase 1A, magnesium dependent, alpha isoform [Source:MGI Symbol;Acc:MGI:99878]
ENSMUSG00000001794	4017.93	4543.08	-0.17053	0.0052693	0.03739	Capns1	protein_coding	calpain, small subunit 1 [Source:MGI Symbol;Acc:MGI:88266]
ENSMUSG00000063904	368.444	441.575	-0.24204	0.0052643	0.03739	Dpp3	protein_coding	dipeptidylpeptidase 3 [Source:MGI Symbol;Acc:MGI:1922471]
ENSMUSG00000055676	33.7132	49.3548	-0.39965	0.0052722	0.03739	Gm5069	protein_coding	predicted pseudogene 5069 [Source:MGI Symbol;Acc:MGI:3644516]
ENSMUSG00000023951	4587.05	3512.24	0.32554	0.0052757	0.037395	Vegfa	protein_coding	vascular endothelial growth factor A [Source:MGI Symbol;Acc:MGI:103178]
ENSMUSG00000030881	264.033	220.37	0.24233	0.0053025	0.037565	Arfip2	protein_coding	ADP-ribosylation factor interacting protein 2 [Source:MGI Symbol;Acc:MGI:1924182]
ENSMUSG00000046229	188.331	237.215	-0.29188	0.0053291	0.037734	Scand1	protein_coding	SCAN domain-containing 1 [Source:MGI Symbol;Acc:MGI:1343132]
ENSMUSG00000018927	186.223	136.121	0.36227	0.005369	0.037996	Ccl6	protein_coding	chemokine (C-C motif) ligand 6 [Source:MGI Symbol;Acc:MGI:98263]
ENSMUSG00000043051	29.3619	15.7231	0.44824	0.0053855	0.038026	Disc1	protein_coding	disrupted in schizophrenia 1 [Source:MGI Symbol;Acc:MGI:2447658]
ENSMUSG00000034432	1353.6	1490.45	-0.13679	0.0053827	0.038026	Cops8	protein_coding	COP9 (constitutive photomorphogenic) homolog, subunit 8 (Arabidopsis thaliana) [Source:MGI Symbol;Acc:MGI:1915363]
ENSMUSG00000000738	2158.41	2424.58	-0.16248	0.0053777	0.038026	Spg7	protein_coding	spastic paraplegia 7 homolog (human) [Source:MGI Symbol;Acc:MGI:2385906]
ENSMUSG00000024304	5861.6	6682.69	-0.18125	0.0053841	0.038026	Cdh2	protein_coding	cadherin 2 [Source:MGI Symbol;Acc:MGI:88355]
ENSMUSG00000021974	101.729	146.59	-0.39103	0.0053872	0.038026	Fgf9	protein_coding	fibroblast growth factor 9 [Source:MGI Symbol;Acc:MGI:104723]
ENSMUSG00000021180	143.205	181.989	-0.29902	0.0053941	0.038054	Rps6ka5	protein_coding	ribosomal protein S6 kinase, polypeptide 5 [Source:MGI Symbol;Acc:MGI:1920336]
ENSMUSG00000037896	357.88	304.374	0.21907	0.0054063	0.03812	Rcor1	protein_coding	REST corepressor 1 [Source:MGI Symbol;Acc:MGI:106340]
ENSMUSG00000004788	469.632	542.944	-0.19834	0.005418	0.038163	Eif2b2	protein_coding	eukaryotic translation initiation factor 2B, subunit 2 beta [Source:MGI Symbol;Acc:MGI:2145118]
ENSMUSG00000026097	128.5	162.976	-0.30088	0.0054171	0.038163	Ormdl1	protein_coding	ORM1-like 1 (S. cerevisiae) [Source:MGI Symbol;Acc:MGI:2181669]
ENSMUSG00000026880	2081.01	2330.01	-0.15804	0.0054383	0.038286	Stom	protein_coding	stomatin [Source:MGI Symbol;Acc:MGI:95403]
ENSMUSG00000001943	68.0752	37.041	0.44762	0.0054457	0.038318	Vsig2	protein_coding	V-set and immunoglobulin domain containing 2 [Source:MGI Symbol;Acc:MGI:1928009]
ENSMUSG00000018398	829.727	700.611	0.2279	0.0054525	0.038346	2019-09-08	protein_coding	septin 8 [Source:MGI Symbol;Acc:MGI:894310]
ENSMUSG00000079083	142.976	108.834	0.33023	0.0054631	0.038401	Jrkl	protein_coding	Jrk-like [Source:MGI Symbol;Acc:MGI:1924782]
ENSMUSG00000008845	300.85	223.645	0.34867	0.0054834	0.038463	Cd163	protein_coding	CD163 antigen [Source:MGI Symbol;Acc:MGI:2135946]
ENSMUSG00000033257	190.239	141.943	0.34694	0.0054823	0.038463	Ttll4	protein_coding	tubulin tyrosine ligase-like family, member 4 [Source:MGI Symbol;Acc:MGI:1914784]
ENSMUSG00000020267	2420.61	2645.29	-0.12537	0.0054825	0.038463	Hint1	protein_coding	histidine triad nucleotide binding protein 1 [Source:MGI Symbol;Acc:MGI:1321133]
ENSMUSG00000019689	1081.79	1273.46	-0.22032	0.0054753	0.038463	1110001J03Rik	protein_coding	RIKEN cDNA 1110001J03 gene [Source:MGI Symbol;Acc:MGI:1913367]
ENSMUSG00000020044	1998.41	2635.01	-0.33269	0.0055097	0.038628	Timp3	protein_coding	tissue inhibitor of metalloproteinase 3 [Source:MGI Symbol;Acc:MGI:98754]
ENSMUSG00000025733	827.876	927.37	-0.15931	0.0055543	0.03892	Rhot2	protein_coding	ras homolog gene family, member T2 [Source:MGI Symbol;Acc:MGI:2384892]
ENSMUSG00000003199	665.553	784.59	-0.22199	0.0055623	0.038956	Mpnd	protein_coding	MPN domain containing [Source:MGI Symbol;Acc:MGI:1915297]
ENSMUSG00000002014	841.322	958.541	-0.18115	0.0055722	0.039006	Ssr4	protein_coding	signal sequence receptor, delta [Source:MGI Symbol;Acc:MGI:1099464]
ENSMUSG00000025103	3235.44	3537.28	-0.12657	0.005587	0.039089	Btbd1	protein_coding	BTB (POZ) domain containing 1 [Source:MGI Symbol;Acc:MGI:1933765]
ENSMUSG00000034793	682.229	776.281	-0.17943	0.0055989	0.039152	G6pc3	protein_coding	glucose 6 phosphatase, catalytic, 3 [Source:MGI Symbol;Acc:MGI:1915651]
ENSMUSG00000085334	84.6314	51.1194	0.43782	0.0056076	0.039173	Gm12940	processed_transcript	predicted gene 12940 [Source:MGI Symbol;Acc:MGI:3702626]
ENSMUSG00000034593	141.126	111.54	0.2977	0.0056077	0.039173	Myo5a	protein_coding	myosin VA [Source:MGI Symbol;Acc:MGI:105976]
ENSMUSG00000031659	146.843	110.845	0.33799	0.005614	0.039196	Adcy7	protein_coding	adenylate cyclase 7 [Source:MGI Symbol;Acc:MGI:102891]
ENSMUSG00000036913	36.0928	21.9605	0.43595	0.0056242	0.039248	Trim67	protein_coding	tripartite motif-containing 67 [Source:MGI Symbol;Acc:MGI:3045323]
ENSMUSG00000079480	223.301	264.427	-0.22632	0.0056348	0.039301	Pin4	protein_coding	protein (peptidyl-prolyl cis/trans isomerase) NIMA-interacting, 4 (parvulin) [Source:MGI Symbol;Acc:MGI:1916963]
ENSMUSG00000029027	50.8804	31.8127	0.43043	0.0056462	0.039361	Dffb	protein_coding	DNA fragmentation factor, beta subunit [Source:MGI Symbol;Acc:MGI:1196287]
ENSMUSG00000027580	403.459	292.495	0.3659	0.0056601	0.039416	Helz2	protein_coding	helicase with zinc finger 2, transcriptional coactivator [Source:MGI Symbol;Acc:MGI:2385169]
ENSMUSG00000020740	263.346	213.858	0.27329	0.0056576	0.039416	Gga3	protein_coding	golgi associated, gamma adaptin ear containing, ARF binding protein 3 [Source:MGI Symbol;Acc:MGI:2384159]
ENSMUSG00000063268	243.71	173.004	0.37852	0.0056657	0.039435	Parp10	protein_coding	poly (ADP-ribose) polymerase family, member 10 [Source:MGI Symbol;Acc:MGI:3712326]
ENSMUSG00000026946	202.793	162.763	0.28053	0.0056768	0.039492	Nmi	protein_coding	N-myc (and STAT) interactor [Source:MGI Symbol;Acc:MGI:1928368]
ENSMUSG00000055980	113.983	74.9102	0.41443	0.0056806	0.039498	Irs1	protein_coding	insulin receptor substrate 1 [Source:MGI Symbol;Acc:MGI:99454]
ENSMUSG00000027679	933.06	1079.6	-0.20005	0.0056949	0.039578	Dnajc19	protein_coding	DnaJ (Hsp40) homolog, subfamily C, member 19 [Source:MGI Symbol;Acc:MGI:1914963]
ENSMUSG00000033752	33.1449	20.6998	0.43022	0.0057112	0.03967	Mnd1	protein_coding	meiotic nuclear divisions 1 homolog (S. cerevisiae) [Source:MGI Symbol;Acc:MGI:1924165]
ENSMUSG00000030126	489.427	587.822	-0.24214	0.0057217	0.039723	Tmcc1	protein_coding	transmembrane and coiled coil domains 1 [Source:MGI Symbol;Acc:MGI:2442368]
ENSMUSG00000059555	155.506	117.323	0.33575	0.0057311	0.039767	Tor4a	protein_coding	torsin family 4, member A [Source:MGI Symbol;Acc:MGI:2442720]
ENSMUSG00000030589	26.2619	15.1969	0.44178	0.0057446	0.039841	Rasgrp4	protein_coding	RAS guanyl releasing protein 4 [Source:MGI Symbol;Acc:MGI:2386851]
ENSMUSG00000060591	1357.98	1590.23	-0.21349	0.0057737	0.040022	Ifitm2	protein_coding	interferon induced transmembrane protein 2 [Source:MGI Symbol;Acc:MGI:1933382]
ENSMUSG00000036781	905.968	1052.2	-0.20352	0.0057884	0.040103	Rps27l	protein_coding	ribosomal protein S27-like [Source:MGI Symbol;Acc:MGI:1915191]
ENSMUSG00000040033	280.883	196.046	0.38729	0.0057984	0.040152	Stat2	protein_coding	signal transducer and activator of transcription 2 [Source:MGI Symbol;Acc:MGI:103039]
ENSMUSG00000019210	1561.84	1716.53	-0.13316	0.0058139	0.040238	Atp6v1e1	protein_coding	ATPase, H+ transporting, lysosomal V1 subunit E1 [Source:MGI Symbol;Acc:MGI:894326]
ENSMUSG00000001424	1127.27	1249.28	-0.14449	0.0058239	0.040287	Snd1	protein_coding	staphylococcal nuclease and tudor domain containing 1 [Source:MGI Symbol;Acc:MGI:1929266]
ENSMUSG00000033389	428.44	504.829	-0.22121	0.0058285	0.040298	Arhgap44	protein_coding	Rho GTPase activating protein 44 [Source:MGI Symbol;Acc:MGI:2144423]
ENSMUSG00000054737	52.9234	35.5217	0.40618	0.0058378	0.040342	Zfp182	protein_coding	zinc finger protein 182 [Source:MGI Symbol;Acc:MGI:2442220]
ENSMUSG00000038369	366.606	299.618	0.2644	0.0058526	0.040424	Ncoa6	protein_coding	nuclear receptor coactivator 6 [Source:MGI Symbol;Acc:MGI:1929915]
ENSMUSG00000022244	581.811	675.372	-0.20433	0.0058653	0.040491	Amacr	protein_coding	alpha-methylacyl-CoA racemase [Source:MGI Symbol;Acc:MGI:1098273]
ENSMUSG00000075592	45.2045	28.7904	0.4205	0.0058716	0.040513	Nynrin	protein_coding	NYN domain and retroviral integrase containing [Source:MGI Symbol;Acc:MGI:2652872]
ENSMUSG00000027305	688.846	807.36	-0.21434	0.0058813	0.04056	Ndufaf1	protein_coding	NADH dehydrogenase (ubiquinone) 1 alpha subcomplex, assembly factor 1 [Source:MGI Symbol;Acc:MGI:1916952]
ENSMUSG00000032366	146216	166153	-0.17677	0.0059072	0.040717	Tpm1	protein_coding	tropomyosin 1, alpha [Source:MGI Symbol;Acc:MGI:98809]
ENSMUSG00000024955	3371.22	3840.68	-0.18027	0.0059303	0.040856	Esrra	protein_coding	estrogen related receptor, alpha [Source:MGI Symbol;Acc:MGI:1346831]
ENSMUSG00000027808	517.234	429.459	0.24594	0.0059492	0.040965	Serp1	protein_coding	stress-associated endoplasmic reticulum protein 1 [Source:MGI Symbol;Acc:MGI:92638]
ENSMUSG00000097048	67.6443	45.623	0.40451	0.0059558	0.04099	1600020E01Rik	lincRNA	RIKEN cDNA 1600020E01 gene [Source:MGI Symbol;Acc:MGI:1919262]
ENSMUSG00000057614	153.955	113.48	0.3537	0.005963	0.041018	Gnai1	protein_coding	guanine nucleotide binding protein (G protein), alpha inhibiting 1 [Source:MGI Symbol;Acc:MGI:95771]
ENSMUSG00000025156	975.898	1094.68	-0.16087	0.0059729	0.041066	Gps1	protein_coding	G protein pathway suppressor 1 [Source:MGI Symbol;Acc:MGI:2384801]
ENSMUSG00000038936	1036.78	1157.32	-0.15457	0.0059823	0.041092	Sccpdh	protein_coding	saccharopine dehydrogenase (putative) [Source:MGI Symbol;Acc:MGI:1924486]
ENSMUSG00000038718	136.562	168.651	-0.27299	0.0059858	0.041092	Pbx3	protein_coding	pre B cell leukemia homeobox 3 [Source:MGI Symbol;Acc:MGI:97496]
ENSMUSG00000031770	3259.54	4925.05	-0.40996	0.0059837	0.041092	Herpud1	protein_coding	homocysteine-inducible, endoplasmic reticulum stress-inducible, ubiquitin-like domain member 1 [Source:MGI Symbol;Acc:MGI:1927406]
ENSMUSG00000022792	395.801	463.118	-0.21378	0.0060158	0.041276	Yars2	protein_coding	tyrosyl-tRNA synthetase 2 (mitochondrial) [Source:MGI Symbol;Acc:MGI:1917370]
ENSMUSG00000045838	462.421	542.468	-0.21674	0.0060415	0.041432	A430105I19Rik	protein_coding	RIKEN cDNA A430105I19 gene [Source:MGI Symbol;Acc:MGI:2685199]
ENSMUSG00000021248	2514.39	2747.28	-0.1255	0.0060506	0.041473	Tmed10	protein_coding	transmembrane emp24-like trafficking protein 10 (yeast) [Source:MGI Symbol;Acc:MGI:1915831]
ENSMUSG00000032329	407.096	349.287	0.20593	0.0060662	0.041538	Hmg20a	protein_coding	high mobility group 20A [Source:MGI Symbol;Acc:MGI:1914117]
ENSMUSG00000022110	10300.3	11293.9	-0.13004	0.0060654	0.041538	Sucla2	protein_coding	succinate-Coenzyme A ligase, ADP-forming, beta subunit [Source:MGI Symbol;Acc:MGI:1306775]
ENSMUSG00000075324	128.556	162.823	-0.29967	0.0060719	0.041556	Fign	protein_coding	fidgetin [Source:MGI Symbol;Acc:MGI:1890647]
ENSMUSG00000045409	203.434	156.952	0.32031	0.006083	0.041597	Trim39	protein_coding	tripartite motif-containing 39 [Source:MGI Symbol;Acc:MGI:1890659]
ENSMUSG00000032135	935.339	804.457	0.20449	0.0060871	0.041597	Mcam	protein_coding	melanoma cell adhesion molecule [Source:MGI Symbol;Acc:MGI:1933966]
ENSMUSG00000021794	2614	2895.32	-0.14378	0.0060864	0.041597	Glud1	protein_coding	glutamate dehydrogenase 1 [Source:MGI Symbol;Acc:MGI:95753]
ENSMUSG00000039629	1733.2	2147.83	-0.27568	0.0060905	0.041599	Strip2	protein_coding	striatin interacting protein 2 [Source:MGI Symbol;Acc:MGI:2444363]
ENSMUSG00000071369	783.019	690.295	0.17557	0.006115	0.041703	Map3k5	protein_coding	mitogen-activated protein kinase kinase kinase 5 [Source:MGI Symbol;Acc:MGI:1346876]
ENSMUSG00000067713	742.685	891.181	-0.24161	0.0061092	0.041703	Prkag1	protein_coding	protein kinase, AMP-activated, gamma 1 non-catalytic subunit [Source:MGI Symbol;Acc:MGI:108411]
ENSMUSG00000050222	189.606	252.665	-0.34061	0.0061147	0.041703	Il17d	protein_coding	interleukin 17D [Source:MGI Symbol;Acc:MGI:2446510]
ENSMUSG00000030278	281.054	64.1156	0.33402	0.0061224	0.041714	Cidec	protein_coding	cell death-inducing DFFA-like effector c [Source:MGI Symbol;Acc:MGI:95585]
ENSMUSG00000035863	906.059	724.098	0.28577	0.0061228	0.041714	Palm	protein_coding	paralemmin [Source:MGI Symbol;Acc:MGI:1261814]
ENSMUSG00000040720	362.849	313.869	0.19967	0.00614	0.04181	1110037F02Rik	protein_coding	RIKEN cDNA 1110037F02 gene [Source:MGI Symbol;Acc:MGI:1913435]
ENSMUSG00000058569	1693.83	1900.91	-0.16074	0.0061677	0.041978	Tmed9	protein_coding	transmembrane emp24 protein transport domain containing 9 [Source:MGI Symbol;Acc:MGI:1914761]
ENSMUSG00000028497	108.699	82.7242	0.32667	0.0061728	0.041991	Ptplad2	protein_coding	protein tyrosine phosphatase-like A domain containing 2 [Source:MGI Symbol;Acc:MGI:1914025]
ENSMUSG00000020522	240.235	193.81	0.27538	0.0062111	0.042231	Mfap3	protein_coding	microfibrillar-associated protein 3 [Source:MGI Symbol;Acc:MGI:1924068]
ENSMUSG00000037363	103.805	75.5465	0.36418	0.0062325	0.042355	Letm2	protein_coding	leucine zipper-EF-hand containing transmembrane protein 2 [Source:MGI Symbol;Acc:MGI:2444979]
ENSMUSG00000018931	167.1	204.098	-0.26144	0.0062437	0.04241	Gm16515	protein_coding	N-acetyltransferase domain containing 1 [Source:MGI Symbol;Acc:MGI:1344388]
ENSMUSG00000017631	657.4	571.278	0.19202	0.0062521	0.042445	Abr	protein_coding	active BCR-related gene [Source:MGI Symbol;Acc:MGI:107771]
ENSMUSG00000028600	449.472	550.116	-0.26119	0.0062693	0.042541	Podn	protein_coding	podocan [Source:MGI Symbol;Acc:MGI:2674939]
ENSMUSG00000071176	316.31	264.821	0.23481	0.0062789	0.042585	Arhgef10	protein_coding	Rho guanine nucleotide exchange factor (GEF) 10 [Source:MGI Symbol;Acc:MGI:2444453]
ENSMUSG00000097184	122.427	158.499	-0.31721	0.0062916	0.042649	4632428C04Rik	lincRNA	RIKEN cDNA 4632428C04 gene [Source:MGI Symbol;Acc:MGI:1921600]
ENSMUSG00000061904	24718.6	26558.6	-0.10217	0.0062979	0.042653	Slc25a3	protein_coding	solute carrier family 25 (mitochondrial carrier, phosphate carrier), member 3 [Source:MGI Symbol;Acc:MGI:1353498]
ENSMUSG00000016253	586.196	672.499	-0.18875	0.0062985	0.042653	Nelfcd	protein_coding	negative elongation factor complex member C/D, Th1l [Source:MGI Symbol;Acc:MGI:1926424]
ENSMUSG00000090258	98.5611	125.618	-0.30272	0.006304	0.042669	Churc1	protein_coding	churchill domain containing 1 [Source:MGI Symbol;Acc:MGI:1923684]
ENSMUSG00000014778	224.148	179.363	0.28614	0.0063115	0.042698	Fhod1	protein_coding	formin homology 2 domain containing 1 [Source:MGI Symbol;Acc:MGI:2679008]
ENSMUSG00000029505	505.391	428.1	0.22316	0.0063179	0.04272	Ep400	protein_coding	E1A binding protein p400 [Source:MGI Symbol;Acc:MGI:1276124]
ENSMUSG00000044562	565.325	664.804	-0.21847	0.0063242	0.042742	Rasip1	protein_coding	Ras interacting protein 1 [Source:MGI Symbol;Acc:MGI:1917153]
[truncated: 158 more rows]

## Sheet: DEGs from IF16 vs AL
Gene ID	readcount_IF12_HE	readcount_AL_HE	log2FoldChange	pval	padj	Associated Gene Name	genetype	Description
ENSMUSG00000055116	235.145	19.2668	2.2585	4.5095e-55	5.5828e-51	Arntl	protein_coding	aryl hydrocarbon receptor nuclear translocator-like [Source:MGI Symbol;Acc:MGI:1096381]
ENSMUSG00000019577	45418.9	5697.61	1.8673	4.9369e-37	3.0559e-33	Pdk4	protein_coding	pyruvate dehydrogenase kinase, isoenzyme 4 [Source:MGI Symbol;Acc:MGI:1351481]
ENSMUSG00000008136	14145.9	21859.9	-0.61161	1.2919e-36	5.3313e-33	Fhl2	protein_coding	four and a half LIM domains 2 [Source:MGI Symbol;Acc:MGI:1338762]
ENSMUSG00000008035	1076.06	2266.31	-0.99053	8.2266e-34	2.5461e-30	Mid1ip1	protein_coding	Mid1 interacting protein 1 (gastrulation specific G12-like (zebrafish)) [Source:MGI Symbol;Acc:MGI:1915291]
ENSMUSG00000023277	5466.86	2703.93	0.94315	2.9352e-33	7.2676e-30	Twf2	protein_coding	twinfilin, actin-binding protein, homolog 2 (Drosophila) [Source:MGI Symbol;Acc:MGI:1346078]
ENSMUSG00000025509	12840.6	7800.62	0.69074	2.0354e-31	4.1998e-28	Pnpla2	protein_coding	patatin-like phospholipase domain containing 2 [Source:MGI Symbol;Acc:MGI:1914103]
ENSMUSG00000003949	509.359	1134.75	-1.0437	4.1946e-31	7.4184e-28	Hlf	protein_coding	hepatic leukemia factor [Source:MGI Symbol;Acc:MGI:96108]
ENSMUSG00000030852	9337.75	5052.64	0.82769	6.6244e-28	1.0251e-24	Tacc2	protein_coding	transforming, acidic coiled-coil containing protein 2 [Source:MGI Symbol;Acc:MGI:1928899]
ENSMUSG00000048416	1497.07	2404.35	-0.6548	1.1014e-26	1.515e-23	Mlf1	protein_coding	myeloid leukemia factor 1 [Source:MGI Symbol;Acc:MGI:1341819]
ENSMUSG00000003154	1018.52	631.431	0.66058	1.9413e-26	2.4033e-23	Foxj2	protein_coding	forkhead box J2 [Source:MGI Symbol;Acc:MGI:1926805]
ENSMUSG00000046598	861.378	1955.62	-1.036	5.922e-25	6.665e-22	Bdh1	protein_coding	3-hydroxybutyrate dehydrogenase, type 1 [Source:MGI Symbol;Acc:MGI:1919161]
ENSMUSG00000043079	3358.39	2178.61	0.60002	2.419e-24	2.4956e-21	Synpo	protein_coding	synaptopodin [Source:MGI Symbol;Acc:MGI:1099446]
ENSMUSG00000031461	34565.4	22417.6	0.60001	6.0083e-24	5.313e-21	Myom2	protein_coding	myomesin 2 [Source:MGI Symbol;Acc:MGI:1328358]
ENSMUSG00000052485	107.336	20.3238	1.4809	5.6285e-24	5.313e-21	Tmem171	protein_coding	transmembrane protein 171 [Source:MGI Symbol;Acc:MGI:2685751]
ENSMUSG00000044067	446.484	855.856	-0.85958	8.9124e-24	7.3557e-21	Gpr22	protein_coding	G protein-coupled receptor 22 [Source:MGI Symbol;Acc:MGI:1920260]
ENSMUSG00000022853	551.766	222.606	1.1028	1.483e-23	1.1474e-20	Ehhadh	protein_coding	enoyl-Coenzyme A, hydratase/3-hydroxyacyl Coenzyme A dehydrogenase [Source:MGI Symbol;Acc:MGI:1277964]
ENSMUSG00000018362	400.021	720.547	-0.78277	6.6394e-22	4.835e-19	Kpna2	protein_coding	karyopherin (importin) alpha 2 [Source:MGI Symbol;Acc:MGI:103561]
ENSMUSG00000015365	913.428	1299.9	-0.49416	9.4194e-21	6.4784e-18	Mov10l1	protein_coding	Moloney leukemia virus 10-like 1 [Source:MGI Symbol;Acc:MGI:1891384]
ENSMUSG00000000628	3166.9	4894.86	-0.59799	4.0248e-20	2.6225e-17	Hk2	protein_coding	hexokinase 2 [Source:MGI Symbol;Acc:MGI:1315197]
ENSMUSG00000022797	215.995	505.725	-1.0296	4.8006e-20	2.9716e-17	Tfrc	protein_coding	transferrin receptor [Source:MGI Symbol;Acc:MGI:98822]
ENSMUSG00000037071	3446	374.315	1.3916	5.9174e-20	3.4884e-17	Scd1	protein_coding	stearoyl-Coenzyme A desaturase 1 [Source:MGI Symbol;Acc:MGI:98239]
ENSMUSG00000020375	652.435	958.887	-0.53315	2.6559e-19	1.4945e-16	Rufy1	protein_coding	RUN and FYVE domain containing 1 [Source:MGI Symbol;Acc:MGI:2429762]
ENSMUSG00000002289	1263.58	109.611	1.3494	3.5691e-19	1.9211e-16	Angptl4	protein_coding	angiopoietin-like 4 [Source:MGI Symbol;Acc:MGI:1888999]
ENSMUSG00000007877	27066	52076.7	-0.84245	5.1753e-19	2.6696e-16	Tcap	protein_coding	titin-cap [Source:MGI Symbol;Acc:MGI:1330233]
ENSMUSG00000040740	5685.58	3344.78	0.70592	4.2998e-18	2.1293e-15	Slc25a34	protein_coding	solute carrier family 25, member 34 [Source:MGI Symbol;Acc:MGI:2686215]
ENSMUSG00000022346	138.296	47.5661	1.1407	1.202e-17	5.7235e-15	Myc	protein_coding	myelocytomatosis oncogene [Source:MGI Symbol;Acc:MGI:97250]
ENSMUSG00000036492	85.2923	22.5381	1.2268	2.7366e-17	1.2548e-14	Rnf39	protein_coding	ring finger protein 39 [Source:MGI Symbol;Acc:MGI:2156378]
ENSMUSG00000003541	282.99	616.725	-0.94131	4.1905e-17	1.8528e-14	Ier3	protein_coding	immediate early response 3 [Source:MGI Symbol;Acc:MGI:104814]
ENSMUSG00000057342	530.503	338.37	0.60998	1.1221e-16	4.7902e-14	Sphk2	protein_coding	sphingosine kinase 2 [Source:MGI Symbol;Acc:MGI:1861380]
ENSMUSG00000028150	848.512	453.747	0.79974	1.9055e-16	7.8633e-14	Rorc	protein_coding	RAR-related orphan receptor gamma [Source:MGI Symbol;Acc:MGI:104856]
ENSMUSG00000031502	4872.15	3490.84	0.46361	2.2677e-16	9.0561e-14	Col4a1	protein_coding	collagen, type IV, alpha 1 [Source:MGI Symbol;Acc:MGI:88454]
ENSMUSG00000020937	368.464	211.067	0.72862	3.8234e-16	1.4792e-13	Plcd3	protein_coding	phospholipase C, delta 3 [Source:MGI Symbol;Acc:MGI:107451]
ENSMUSG00000026077	89.893	28.1317	1.128	2.4499e-15	9.1908e-13	Npas2	protein_coding	neuronal PAS domain protein 2 [Source:MGI Symbol;Acc:MGI:109232]
ENSMUSG00000037762	90.113	28.0542	1.1229	2.6616e-15	9.6913e-13	Slc16a9	protein_coding	solute carrier family 16 (monocarboxylic acid transporters), member 9 [Source:MGI Symbol;Acc:MGI:1914109]
ENSMUSG00000067653	6715.9	4515.54	0.54157	4.4552e-15	1.5759e-12	Ankrd23	protein_coding	ankyrin repeat domain 23 [Source:MGI Symbol;Acc:MGI:1925571]
ENSMUSG00000059824	412.693	2345.58	-1.1783	1.1017e-14	3.7885e-12	Dbp	protein_coding	D site albumin promoter binding protein [Source:MGI Symbol;Acc:MGI:94866]
ENSMUSG00000039629	1463.1	2315.75	-0.61342	1.2126e-14	4.0572e-12	Strip2	protein_coding	striatin interacting protein 2 [Source:MGI Symbol;Acc:MGI:2444363]
ENSMUSG00000036181	2974.04	1917.52	0.58949	2.1939e-14	6.9641e-12	Hist1h1c	protein_coding	histone cluster 1, H1c [Source:MGI Symbol;Acc:MGI:1931526]
ENSMUSG00000045636	3687.76	2811.42	0.38031	2.1837e-14	6.9641e-12	Mtus1	protein_coding	mitochondrial tumor suppressor 1 [Source:MGI Symbol;Acc:MGI:2142572]
ENSMUSG00000030161	3432.03	2203.61	0.59434	2.4562e-14	7.602e-12	Gabarapl1	protein_coding	gamma-aminobutyric acid (GABA) A receptor-associated protein-like 1 [Source:MGI Symbol;Acc:MGI:1914980]
ENSMUSG00000072949	1435.41	480.043	1.0787	2.6468e-14	7.9921e-12	Acot1	protein_coding	acyl-CoA thioesterase 1 [Source:MGI Symbol;Acc:MGI:1349396]
ENSMUSG00000029675	880.944	447.835	0.82629	6.8532e-14	2.0089e-11	Eln	protein_coding	elastin [Source:MGI Symbol;Acc:MGI:95317]
ENSMUSG00000046768	690.82	454.992	0.56503	6.9776e-14	2.0089e-11	Rhoj	protein_coding	ras homolog gene family, member J [Source:MGI Symbol;Acc:MGI:1931551]
ENSMUSG00000025813	1128.33	1562.93	-0.45055	7.5631e-14	2.128e-11	Homer2	protein_coding	homer homolog 2 (Drosophila) [Source:MGI Symbol;Acc:MGI:1347354]
ENSMUSG00000052934	3459.63	2442.51	0.47879	8.3017e-14	2.2839e-11	Fbxo31	protein_coding	F-box protein 31 [Source:MGI Symbol;Acc:MGI:1354708]
ENSMUSG00000039004	1363.92	887.086	0.57834	9.0929e-14	2.4472e-11	Bmp6	protein_coding	bone morphogenetic protein 6 [Source:MGI Symbol;Acc:MGI:88182]
ENSMUSG00000022389	2548.52	4090.41	-0.62568	1.1292e-13	2.9744e-11	Tef	protein_coding	thyrotroph embryonic factor [Source:MGI Symbol;Acc:MGI:98663]
ENSMUSG00000030103	409.062	886.797	-0.89697	1.3048e-13	3.3652e-11	Bhlhe40	protein_coding	basic helix-loop-helix family, member e40 [Source:MGI Symbol;Acc:MGI:1097714]
ENSMUSG00000000184	1115.45	1714.41	-0.57641	1.4212e-13	3.5685e-11	Ccnd2	protein_coding	cyclin D2 [Source:MGI Symbol;Acc:MGI:88314]
ENSMUSG00000021775	1220.68	2147.92	-0.72083	1.4412e-13	3.5685e-11	Nr1d2	protein_coding	nuclear receptor subfamily 1, group D, member 2 [Source:MGI Symbol;Acc:MGI:2449205]
ENSMUSG00000087259	277.428	144.628	0.8025	1.7848e-13	4.3326e-11	2610035D17Rik	lincRNA	RIKEN cDNA 2610035D17 gene [Source:MGI Symbol;Acc:MGI:1919636]
ENSMUSG00000028527	616.817	852.752	-0.44832	3.6408e-13	8.6634e-11	Ak4	protein_coding	adenylate kinase 4 [Source:MGI Symbol;Acc:MGI:87979]
ENSMUSG00000042109	1721.41	1151.48	0.54358	3.7089e-13	8.6634e-11	Csdc2	protein_coding	cold shock domain containing C2, RNA binding [Source:MGI Symbol;Acc:MGI:2146027]
ENSMUSG00000038178	478.061	263.246	0.74571	4.0625e-13	9.3136e-11	Slc43a2	protein_coding	solute carrier family 43, member 2 [Source:MGI Symbol;Acc:MGI:2442746]
ENSMUSG00000054717	430.924	216.465	0.82396	4.5938e-13	1.034e-10	Hmgb2	protein_coding	high mobility group box 2 [Source:MGI Symbol;Acc:MGI:96157]
ENSMUSG00000025993	745.621	452.676	0.64871	4.8426e-13	1.0705e-10	Slc40a1	protein_coding	solute carrier family 40 (iron-regulated transporter), member 1 [Source:MGI Symbol;Acc:MGI:1315204]
ENSMUSG00000023905	1160.7	614.994	0.78172	5.0763e-13	1.1025e-10	Tnfrsf12a	protein_coding	tumor necrosis factor receptor superfamily, member 12a [Source:MGI Symbol;Acc:MGI:1351484]
ENSMUSG00000036528	519.855	301.602	0.6928	1.9303e-12	4.1202e-10	Ppfibp2	protein_coding	PTPRF interacting protein, binding protein 2 (liprin beta 2) [Source:MGI Symbol;Acc:MGI:894649]
ENSMUSG00000046841	589.466	409.218	0.49754	2.1493e-12	4.5098e-10	Ckap4	protein_coding	cytoskeleton-associated protein 4 [Source:MGI Symbol;Acc:MGI:2444926]
ENSMUSG00000022951	1628.61	1144.29	0.48052	2.6429e-12	5.4533e-10	Rcan1	protein_coding	regulator of calcineurin 1 [Source:MGI Symbol;Acc:MGI:1890564]
ENSMUSG00000003123	1078.99	636.568	0.67429	2.9476e-12	5.9822e-10	Lipe	protein_coding	lipase, hormone sensitive [Source:MGI Symbol;Acc:MGI:96790]
ENSMUSG00000042675	1522.84	1063.97	0.48811	3.3573e-12	6.7038e-10	Ypel3	protein_coding	yippee-like 3 (Drosophila) [Source:MGI Symbol;Acc:MGI:1913340]
ENSMUSG00000056612	649.182	945.518	-0.50824	3.8643e-12	7.5937e-10	Ppp1r14b	protein_coding	protein phosphatase 1, regulatory (inhibitor) subunit 14B [Source:MGI Symbol;Acc:MGI:107682]
ENSMUSG00000027030	1443.82	1986.23	-0.43817	7.2597e-12	1.3968e-09	Stk39	protein_coding	serine/threonine kinase 39 [Source:MGI Symbol;Acc:MGI:1858416]
ENSMUSG00000028475	143.083	72.7848	0.80101	7.334e-12	1.3968e-09	5430416O09Rik	lincRNA	RIKEN cDNA 5430416O09 gene [Source:MGI Symbol;Acc:MGI:1918656]
ENSMUSG00000030223	92.4734	37.6982	0.93147	8.5756e-12	1.6017e-09	Ptpro	protein_coding	protein tyrosine phosphatase, receptor type, O [Source:MGI Symbol;Acc:MGI:1097152]
ENSMUSG00000035357	688.203	428.541	0.61552	8.6683e-12	1.6017e-09	Pdzrn3	protein_coding	PDZ domain containing RING finger 3 [Source:MGI Symbol;Acc:MGI:1933157]
ENSMUSG00000029338	2084.44	2674.67	-0.34861	9.5577e-12	1.7401e-09	Antxr2	protein_coding	anthrax toxin receptor 2 [Source:MGI Symbol;Acc:MGI:1919164]
ENSMUSG00000016319	3015.77	3831.21	-0.33575	1.0314e-11	1.8506e-09	Slc25a5	protein_coding	solute carrier family 25 (mitochondrial carrier, adenine nucleotide translocator), member 5 [Source:MGI Symbol;Acc:MGI:1353496]
ENSMUSG00000031503	3968.25	2929.72	0.41888	1.0566e-11	1.8688e-09	Col4a2	protein_coding	collagen, type IV, alpha 2 [Source:MGI Symbol;Acc:MGI:88455]
ENSMUSG00000057604	729.756	521.787	0.4569	1.1012e-11	1.9201e-09	Lmcd1	protein_coding	LIM and cysteine-rich domains 1 [Source:MGI Symbol;Acc:MGI:1353635]
ENSMUSG00000022894	639.391	359.032	0.71383	1.2835e-11	2.207e-09	Adamts5	protein_coding	a disintegrin-like and metallopeptidase (reprolysin type) with thrombospondin type 1 motif, 5 (aggrecanase-2) [Source:MGI Symbol;Acc:MGI:1346321]
ENSMUSG00000015837	10985.7	8324.88	0.3857	1.3583e-11	2.3035e-09	Sqstm1	protein_coding	sequestosome 1 [Source:MGI Symbol;Acc:MGI:107931]
ENSMUSG00000022186	16455.5	21533.8	-0.37476	1.4349e-11	2.4006e-09	Oxct1	protein_coding	3-oxoacid CoA transferase 1 [Source:MGI Symbol;Acc:MGI:1914291]
ENSMUSG00000020034	2508.16	1689.17	0.52933	1.6476e-11	2.7196e-09	Tcp11l2	protein_coding	t-complex 11 (mouse) like 2 [Source:MGI Symbol;Acc:MGI:2444679]
ENSMUSG00000020340	2284.28	2972.45	-0.36778	1.7327e-11	2.8226e-09	Cyfip2	protein_coding	cytoplasmic FMR1 interacting protein 2 [Source:MGI Symbol;Acc:MGI:1924134]
ENSMUSG00000032786	1858.67	2729.19	-0.51609	2.0976e-11	3.3725e-09	Alas1	protein_coding	aminolevulinic acid synthase 1 [Source:MGI Symbol;Acc:MGI:87989]
ENSMUSG00000000056	1258.23	1816.98	-0.49607	2.1286e-11	3.3784e-09	Narf	protein_coding	nuclear prelamin A recognition factor [Source:MGI Symbol;Acc:MGI:1914858]
ENSMUSG00000020642	388.081	203.506	0.76822	2.671e-11	4.1857e-09	Rnf144a	protein_coding	ring finger protein 144A [Source:MGI Symbol;Acc:MGI:1344401]
ENSMUSG00000018882	932.611	1232.13	-0.3871	3.7682e-11	5.8313e-09	Mrpl45	protein_coding	mitochondrial ribosomal protein L45 [Source:MGI Symbol;Acc:MGI:1914286]
ENSMUSG00000053716	906.82	1175.6	-0.36103	4.4456e-11	6.7946e-09	Dusp7	protein_coding	dual specificity phosphatase 7 [Source:MGI Symbol;Acc:MGI:2387100]
ENSMUSG00000040675	24.2173	65.7601	-0.94801	4.5201e-11	6.8242e-09	Mthfd1l	protein_coding	methylenetetrahydrofolate dehydrogenase (NADP+ dependent) 1-like [Source:MGI Symbol;Acc:MGI:1924836]
ENSMUSG00000029009	281.578	169.345	0.64583	4.9518e-11	7.386e-09	Mthfr	protein_coding	5,10-methylenetetrahydrofolate reductase [Source:MGI Symbol;Acc:MGI:106639]
ENSMUSG00000014226	834.529	1230.72	-0.51914	5.2052e-11	7.6715e-09	Cacybp	protein_coding	calcyclin binding protein [Source:MGI Symbol;Acc:MGI:1270839]
ENSMUSG00000034708	1914.42	1511.78	0.33109	5.3791e-11	7.8346e-09	Grn	protein_coding	granulin [Source:MGI Symbol;Acc:MGI:95832]
ENSMUSG00000032010	1741.73	2663.22	-0.55997	5.5669e-11	8.0137e-09	Usp2	protein_coding	ubiquitin specific peptidase 2 [Source:MGI Symbol;Acc:MGI:1858178]
ENSMUSG00000030256	438.461	860.494	-0.78601	6.3182e-11	8.9907e-09	Bhlhe41	protein_coding	basic helix-loop-helix family, member e41 [Source:MGI Symbol;Acc:MGI:1930704]
ENSMUSG00000028195	1410.49	827.656	0.66949	6.5954e-11	9.2786e-09	Cyr61	protein_coding	cysteine rich protein 61 [Source:MGI Symbol;Acc:MGI:88613]
ENSMUSG00000045776	3163.6	4427.31	-0.45722	9.2684e-11	1.2892e-08	Lrtm1	protein_coding	leucine-rich repeats and transmembrane domains 1 [Source:MGI Symbol;Acc:MGI:2442106]
ENSMUSG00000040435	634.789	407.498	0.57786	1.0741e-10	1.4775e-08	Ppp1r15a	protein_coding	protein phosphatase 1, regulatory (inhibitor) subunit 15A [Source:MGI Symbol;Acc:MGI:1927072]
ENSMUSG00000051343	1657.2	1219.6	0.41955	1.6812e-10	2.2872e-08	Rab11fip5	protein_coding	RAB11 family interacting protein 5 (class I) [Source:MGI Symbol;Acc:MGI:1098586]
ENSMUSG00000000325	450.623	310.512	0.50032	2.122e-10	2.8353e-08	Arvcf	protein_coding	armadillo repeat gene deleted in velo-cardio-facial syndrome [Source:MGI Symbol;Acc:MGI:109620]
ENSMUSG00000014633	558.16	760.683	-0.424	2.1589e-10	2.8353e-08	Cmc2	protein_coding	COX assembly mitochondrial protein 2 [Source:MGI Symbol;Acc:MGI:1913781]
ENSMUSG00000032511	3229.57	4774	-0.51987	2.1331e-10	2.8353e-08	Scn5a	protein_coding	sodium channel, voltage-gated, type V, alpha [Source:MGI Symbol;Acc:MGI:98251]
ENSMUSG00000037709	509.547	320.842	0.59398	2.1757e-10	2.8353e-08	Fam13a	protein_coding	family with sequence similarity 13, member A [Source:MGI Symbol;Acc:MGI:1889842]
ENSMUSG00000029673	393.516	252.317	0.57648	2.3341e-10	3.0101e-08	Auts2	protein_coding	autism susceptibility candidate 2 [Source:MGI Symbol;Acc:MGI:1919847]
ENSMUSG00000027875	1722.81	726.085	0.8796	2.3964e-10	3.0585e-08	Hmgcs2	protein_coding	3-hydroxy-3-methylglutaryl-Coenzyme A synthase 2 [Source:MGI Symbol;Acc:MGI:101939]
ENSMUSG00000050043	994.063	1358.32	-0.42776	2.5316e-10	3.1981e-08	Tmx2	protein_coding	thioredoxin-related transmembrane protein 2 [Source:MGI Symbol;Acc:MGI:1914208]
ENSMUSG00000004098	413.672	211.227	0.77353	2.6289e-10	3.2874e-08	Col5a3	protein_coding	collagen, type V, alpha 3 [Source:MGI Symbol;Acc:MGI:1858212]
ENSMUSG00000035969	1343.43	1001.59	0.40428	2.6605e-10	3.2938e-08	Rusc2	protein_coding	RUN and SH3 domain containing 2 [Source:MGI Symbol;Acc:MGI:2140371]
ENSMUSG00000011256	528.385	255.485	0.80827	2.8593e-10	3.5048e-08	Adam19	protein_coding	a disintegrin and metallopeptidase domain 19 (meltrin beta) [Source:MGI Symbol;Acc:MGI:105377]
ENSMUSG00000021226	2930.63	1707.66	0.66883	3.0805e-10	3.7389e-08	Acot2	protein_coding	acyl-CoA thioesterase 2 [Source:MGI Symbol;Acc:MGI:2159605]
ENSMUSG00000056698	439.316	269.67	0.6194	3.2272e-10	3.8416e-08	Elmod3	protein_coding	ELMO/CED-12 domain containing 3 [Source:MGI Symbol;Acc:MGI:2445168]
ENSMUSG00000056938	403.68	281.88	0.48059	3.2164e-10	3.8416e-08	Acbd4	protein_coding	acyl-Coenzyme A binding domain containing 4 [Source:MGI Symbol;Acc:MGI:1914381]
ENSMUSG00000042010	6932.09	5300.42	0.37181	3.9893e-10	4.7036e-08	Acacb	protein_coding	acetyl-Coenzyme A carboxylase beta [Source:MGI Symbol;Acc:MGI:2140940]
ENSMUSG00000071176	429.754	285.515	0.53765	4.1484e-10	4.845e-08	Arhgef10	protein_coding	Rho guanine nucleotide exchange factor (GEF) 10 [Source:MGI Symbol;Acc:MGI:2444453]
ENSMUSG00000020326	8806.99	12507.8	-0.47267	4.4576e-10	5.1575e-08	Ccng1	protein_coding	cyclin G1 [Source:MGI Symbol;Acc:MGI:102890]
ENSMUSG00000079243	3458.3	2623.02	0.38209	4.5519e-10	5.2178e-08	Xirp1	protein_coding	xin actin-binding repeat containing 1 [Source:MGI Symbol;Acc:MGI:1333878]
ENSMUSG00000031217	698.543	469.187	0.52454	4.6075e-10	5.2331e-08	Efnb1	protein_coding	ephrin B1 [Source:MGI Symbol;Acc:MGI:102708]
ENSMUSG00000032300	264.076	139.496	0.74539	5.2871e-10	5.9504e-08	1700017B05Rik	protein_coding	RIKEN cDNA 1700017B05 gene [Source:MGI Symbol;Acc:MGI:1921461]
ENSMUSG00000038807	994.405	1289.59	-0.36028	5.376e-10	5.9959e-08	Rap1gap2	protein_coding	RAP1 GTPase activating protein 2 [Source:MGI Symbol;Acc:MGI:3028623]
ENSMUSG00000028427	726.289	423.783	0.66303	6.2946e-10	6.8962e-08	Aqp7	protein_coding	aquaporin 7 [Source:MGI Symbol;Acc:MGI:1314647]
ENSMUSG00000031530	132.615	52.6693	0.8878	6.2868e-10	6.8962e-08	Dusp4	protein_coding	dual specificity phosphatase 4 [Source:MGI Symbol;Acc:MGI:2442191]
ENSMUSG00000026858	1403.94	996.372	0.46241	6.5684e-10	7.133e-08	Fam73b	protein_coding	family with sequence similarity 73, member B [Source:MGI Symbol;Acc:MGI:1922035]
ENSMUSG00000029328	1318.7	1680.52	-0.33851	6.7624e-10	7.2798e-08	Hnrnpdl	protein_coding	heterogeneous nuclear ribonucleoprotein D-like [Source:MGI Symbol;Acc:MGI:1355299]
ENSMUSG00000092397	306.654	490.011	-0.59943	7.2e-10	7.6841e-08	C130080G10Rik	antisense	RIKEN cDNA C130080G10 gene [Source:MGI Symbol;Acc:MGI:4844008]
ENSMUSG00000021265	115.601	191.322	-0.62902	7.3091e-10	7.7339e-08	Slc25a29	protein_coding	solute carrier family 25 (mitochondrial carrier, palmitoylcarnitine transporter), member 29 [Source:MGI Symbol;Acc:MGI:2444911]
ENSMUSG00000064373	6490.39	5244.94	0.29906	9.7987e-10	1.028e-07	Sepp1	protein_coding	selenoprotein P, plasma, 1 [Source:MGI Symbol;Acc:MGI:894288]
ENSMUSG00000062329	400.52	278.565	0.48773	1.0378e-09	1.0797e-07	Cytl1	protein_coding	cytokine-like 1 [Source:MGI Symbol;Acc:MGI:2684993]
ENSMUSG00000041220	52.4193	17.5805	0.91638	1.0489e-09	1.0821e-07	Elovl6	protein_coding	ELOVL family member 6, elongation of long chain fatty acids (yeast) [Source:MGI Symbol;Acc:MGI:2156528]
ENSMUSG00000026064	3639.95	2566.62	0.46901	1.4269e-09	1.4599e-07	Ptp4a1	protein_coding	protein tyrosine phosphatase 4a1 [Source:MGI Symbol;Acc:MGI:1277096]
ENSMUSG00000020653	356.868	224.046	0.59278	1.4956e-09	1.5176e-07	Klf11	protein_coding	Kruppel-like factor 11 [Source:MGI Symbol;Acc:MGI:2653368]
ENSMUSG00000015357	2667.57	1975.39	0.41004	1.6114e-09	1.6219e-07	Clpx	protein_coding	caseinolytic mitochondrial matrix peptidase chaperone subunit [Source:MGI Symbol;Acc:MGI:1346017]
ENSMUSG00000096054	1467.69	1089.32	0.40784	1.6894e-09	1.6866e-07	Syne1	protein_coding	spectrin repeat containing, nuclear envelope 1 [Source:MGI Symbol;Acc:MGI:1927152]
ENSMUSG00000086841	264.09	168.039	0.57775	2.0507e-09	2.031e-07	2410006H16Rik	processed_transcript	RIKEN cDNA 2410006H16 gene [Source:MGI Symbol;Acc:MGI:1916471]
ENSMUSG00000047976	141.107	67.8453	0.79036	2.3738e-09	2.3323e-07	Kcna1	protein_coding	potassium voltage-gated channel, shaker-related subfamily, member 1 [Source:MGI Symbol;Acc:MGI:96654]
ENSMUSG00000000805	485.58	294.178	0.62562	2.8693e-09	2.797e-07	Car4	protein_coding	carbonic anhydrase 4 [Source:MGI Symbol;Acc:MGI:1096574]
ENSMUSG00000030217	640.953	436.083	0.50601	2.9915e-09	2.8934e-07	Art4	protein_coding	ADP-ribosyltransferase 4 [Source:MGI Symbol;Acc:MGI:1202710]
ENSMUSG00000015090	1520.45	3528.06	-0.83642	3.0496e-09	2.9266e-07	Ptgds	protein_coding	prostaglandin D2 synthase (brain) [Source:MGI Symbol;Acc:MGI:99261]
ENSMUSG00000001909	693.059	534.626	0.35826	3.4527e-09	3.288e-07	Trmt1	protein_coding	tRNA methyltransferase 1 [Source:MGI Symbol;Acc:MGI:1289155]
ENSMUSG00000042607	148.781	74.6559	0.75681	3.6408e-09	3.4407e-07	Asb4	protein_coding	ankyrin repeat and SOCS box-containing 4 [Source:MGI Symbol;Acc:MGI:1929751]
ENSMUSG00000032336	1536.12	1826.23	-0.2448	4.2191e-09	3.957e-07	Nptn	protein_coding	neuroplastin [Source:MGI Symbol;Acc:MGI:108077]
ENSMUSG00000033685	2008.49	1442.9	0.4462	4.3471e-09	4.0464e-07	Ucp2	protein_coding	uncoupling protein 2 (mitochondrial, proton carrier) [Source:MGI Symbol;Acc:MGI:109354]
ENSMUSG00000029246	350.877	485.845	-0.44091	4.6111e-09	4.2601e-07	Ppat	protein_coding	phosphoribosyl pyrophosphate amidotransferase [Source:MGI Symbol;Acc:MGI:2387203]
ENSMUSG00000025701	218.925	323.51	-0.51295	4.9925e-09	4.5783e-07	Alox5	protein_coding	arachidonate 5-lipoxygenase [Source:MGI Symbol;Acc:MGI:87999]
ENSMUSG00000056494	88.6845	39.6306	0.81379	5.1264e-09	4.6666e-07	Cngb3	protein_coding	cyclic nucleotide gated channel beta 3 [Source:MGI Symbol;Acc:MGI:1353562]
ENSMUSG00000037110	829.226	1100.69	-0.38817	6.1247e-09	5.5346e-07	Ralgapa2	protein_coding	Ral GTPase activating protein, alpha subunit 2 (catalytic) [Source:MGI Symbol;Acc:MGI:3036245]
ENSMUSG00000062901	3445.54	2339.94	0.50786	6.3428e-09	5.6901e-07	Klhl24	protein_coding	kelch-like 24 [Source:MGI Symbol;Acc:MGI:1923035]
ENSMUSG00000037949	852.897	1146.48	-0.40323	7.0095e-09	6.243e-07	Ano10	protein_coding	anoctamin 10 [Source:MGI Symbol;Acc:MGI:2143103]
ENSMUSG00000041957	3612.89	2930.47	0.29344	7.0725e-09	6.2541e-07	Pkp2	protein_coding	plakophilin 2 [Source:MGI Symbol;Acc:MGI:1914701]
ENSMUSG00000061740	589.445	419.521	0.45638	7.1983e-09	6.3202e-07	Cyp2d22	protein_coding	cytochrome P450, family 2, subfamily d, polypeptide 22 [Source:MGI Symbol;Acc:MGI:1929474]
ENSMUSG00000040990	1425.22	1984.65	-0.44512	7.3524e-09	6.41e-07	Sh3kbp1	protein_coding	SH3-domain kinase binding protein 1 [Source:MGI Symbol;Acc:MGI:1889583]
ENSMUSG00000026687	870.225	622.352	0.44909	8.1314e-09	7.0396e-07	Aldh9a1	protein_coding	aldehyde dehydrogenase 9, subfamily A1 [Source:MGI Symbol;Acc:MGI:1861622]
ENSMUSG00000048065	201.069	131.594	0.5441	8.7414e-09	7.5152e-07	Cyb5r2	protein_coding	cytochrome b5 reductase 2 [Source:MGI Symbol;Acc:MGI:2444415]
ENSMUSG00000028057	1645.46	1141.28	0.48341	8.9814e-09	7.6683e-07	Rit1	protein_coding	Ras-like without CAAX 1 [Source:MGI Symbol;Acc:MGI:108053]
ENSMUSG00000039982	193.92	104.497	0.70254	1.0988e-08	9.3175e-07	Dtx4	protein_coding	deltex 4 homolog (Drosophila) [Source:MGI Symbol;Acc:MGI:2672905]
ENSMUSG00000067279	1256.09	2131.63	-0.64006	1.1203e-08	9.4352e-07	Ppp1r3c	protein_coding	protein phosphatase 1, regulatory (inhibitor) subunit 3C [Source:MGI Symbol;Acc:MGI:1858229]
ENSMUSG00000042842	1149.66	872.401	0.37761	1.3116e-08	1.0971e-06	Serpinb6b	protein_coding	serine (or cysteine) peptidase inhibitor, clade B, member 6b [Source:MGI Symbol;Acc:MGI:894688]
ENSMUSG00000060882	280.317	397.137	-0.46486	1.4601e-08	1.2132e-06	Kcnd2	protein_coding	potassium voltage-gated channel, Shal-related family, member 2 [Source:MGI Symbol;Acc:MGI:102663]
ENSMUSG00000056121	1592.69	2089.9	-0.37263	1.5398e-08	1.2708e-06	Fez2	protein_coding	fasciculation and elongation protein zeta 2 (zygin II) [Source:MGI Symbol;Acc:MGI:2675856]
ENSMUSG00000096957	294.325	194.508	0.52991	1.6539e-08	1.356e-06	E230013L22Rik	lincRNA	RIKEN cDNA E230013L22 gene [Source:MGI Symbol;Acc:MGI:2142601]
ENSMUSG00000046562	429.663	300.295	0.47529	1.7252e-08	1.4051e-06	Unc119b	protein_coding	unc-119 homolog B (C. elegans) [Source:MGI Symbol;Acc:MGI:2147162]
ENSMUSG00000006221	33627.2	40946.6	-0.27655	1.7634e-08	1.4269e-06	Hspb7	protein_coding	heat shock protein family, member 7 (cardiovascular) [Source:MGI Symbol;Acc:MGI:1352494]
ENSMUSG00000001175	3697.51	4299.64	-0.21419	1.8267e-08	1.4679e-06	Calm1	protein_coding	calmodulin 1 [Source:MGI Symbol;Acc:MGI:88251]
ENSMUSG00000040797	61.6935	26.9613	0.80239	1.8378e-08	1.4679e-06	Iqsec3	protein_coding	IQ motif and Sec7 domain 3 [Source:MGI Symbol;Acc:MGI:2677208]
ENSMUSG00000062373	3683.58	4554.64	-0.29706	1.907e-08	1.5134e-06	Tmem65	protein_coding	transmembrane protein 65 [Source:MGI Symbol;Acc:MGI:1922118]
ENSMUSG00000029231	759.172	534.622	0.46429	1.9283e-08	1.5205e-06	Pdgfra	protein_coding	platelet derived growth factor receptor, alpha polypeptide [Source:MGI Symbol;Acc:MGI:97530]
ENSMUSG00000021390	1608.76	2014.9	-0.3145	2.0613e-08	1.6151e-06	Ogn	protein_coding	osteoglycin [Source:MGI Symbol;Acc:MGI:109278]
ENSMUSG00000042487	233.002	145.2	0.58656	2.3235e-08	1.8091e-06	Leo1	protein_coding	Leo1, Paf1/RNA polymerase II complex component, homolog (S. cerevisiae) [Source:MGI Symbol;Acc:MGI:2685031]
ENSMUSG00000026888	3215.75	4107.78	-0.33861	2.3537e-08	1.8212e-06	Grb14	protein_coding	growth factor receptor bound protein 14 [Source:MGI Symbol;Acc:MGI:1355324]
ENSMUSG00000021457	620.882	454.211	0.42278	2.4045e-08	1.8489e-06	Syk	protein_coding	spleen tyrosine kinase [Source:MGI Symbol;Acc:MGI:99515]
ENSMUSG00000042524	2192.03	1820.46	0.2612	2.8069e-08	2.145e-06	Sun2	protein_coding	Sad1 and UNC84 domain containing 2 [Source:MGI Symbol;Acc:MGI:2443011]
ENSMUSG00000006418	1954.91	1457.22	0.39887	2.99e-08	2.2709e-06	Rnf114	protein_coding	ring finger protein 114 [Source:MGI Symbol;Acc:MGI:1933159]
ENSMUSG00000030739	2991.45	2299.07	0.36154	3.2596e-08	2.4606e-06	Myh14	protein_coding	myosin, heavy polypeptide 14 [Source:MGI Symbol;Acc:MGI:1919210]
ENSMUSG00000073676	1775.28	2418.6	-0.41642	3.3673e-08	2.5265e-06	Hspe1	protein_coding	heat shock protein 1 (chaperonin 10) [Source:MGI Symbol;Acc:MGI:104680]
ENSMUSG00000020846	819.47	572.184	0.47307	3.5556e-08	2.6517e-06	Fam101b	protein_coding	family with sequence similarity 101, member B [Source:MGI Symbol;Acc:MGI:1923816]
ENSMUSG00000074781	1325.86	1622.4	-0.28228	4.305e-08	3.1914e-06	Ube2n	protein_coding	ubiquitin-conjugating enzyme E2N [Source:MGI Symbol;Acc:MGI:1934835]
ENSMUSG00000032002	606.503	757.143	-0.30835	4.7396e-08	3.4755e-06	Dcun1d5	protein_coding	DCN1, defective in cullin neddylation 1, domain containing 5 (S. cerevisiae) [Source:MGI Symbol;Acc:MGI:1924113]
ENSMUSG00000050640	130.29	206.409	-0.57232	4.7444e-08	3.4755e-06	Tmem150c	protein_coding	transmembrane protein 150C [Source:MGI Symbol;Acc:MGI:3041258]
ENSMUSG00000022041	133.398	60.4445	0.77561	4.8216e-08	3.5112e-06	Chrna2	protein_coding	cholinergic receptor, nicotinic, alpha polypeptide 2 (neuronal) [Source:MGI Symbol;Acc:MGI:87886]
ENSMUSG00000026202	7886.65	11480.9	-0.48968	5.1834e-08	3.7527e-06	Tuba4a	protein_coding	tubulin, alpha 4A [Source:MGI Symbol;Acc:MGI:1095410]
ENSMUSG00000032199	2584.34	3004.5	-0.21371	5.2787e-08	3.7994e-06	Polr2m	protein_coding	polymerase (RNA) II (DNA directed) polypeptide M [Source:MGI Symbol;Acc:MGI:107282]
ENSMUSG00000056749	280.534	144.874	0.71481	6.3927e-08	4.5747e-06	Nfil3	protein_coding	nuclear factor, interleukin 3, regulated [Source:MGI Symbol;Acc:MGI:109495]
ENSMUSG00000024966	1836.25	2598.86	-0.45834	6.7398e-08	4.7953e-06	Stip1	protein_coding	stress-induced phosphoprotein 1 [Source:MGI Symbol;Acc:MGI:109130]
ENSMUSG00000024529	124.206	60.8349	0.74059	6.7864e-08	4.8009e-06	Lox	protein_coding	lysyl oxidase [Source:MGI Symbol;Acc:MGI:96817]
ENSMUSG00000042364	632.781	476.916	0.38221	7.0261e-08	4.9422e-06	Snx18	protein_coding	sorting nexin 18 [Source:MGI Symbol;Acc:MGI:2137642]
ENSMUSG00000020844	487.786	343.121	0.46589	7.0796e-08	4.9518e-06	Nxn	protein_coding	nucleoredoxin [Source:MGI Symbol;Acc:MGI:109331]
ENSMUSG00000018566	6331.96	7878.39	-0.3041	7.3018e-08	5.0784e-06	Slc2a4	protein_coding	solute carrier family 2 (facilitated glucose transporter), member 4 [Source:MGI Symbol;Acc:MGI:95758]
ENSMUSG00000024526	759.469	519.406	0.49269	7.3552e-08	5.087e-06	Cidea	protein_coding	cell death-inducing DNA fragmentation factor, alpha subunit-like effector A [Source:MGI Symbol;Acc:MGI:1270845]
ENSMUSG00000016257	672.099	873.429	-0.35831	7.6756e-08	5.25e-06	Slmo2	protein_coding	slowmo homolog 2 (Drosophila) [Source:MGI Symbol;Acc:MGI:1913640]
ENSMUSG00000020029	4819.01	6622.47	-0.42516	7.6443e-08	5.25e-06	Nudt4	protein_coding	nudix (nucleoside diphosphate linked moiety X)-type motif 4 [Source:MGI Symbol;Acc:MGI:1918457]
ENSMUSG00000031016	219.688	419.615	-0.70389	7.8605e-08	5.3469e-06	Wee1	protein_coding	WEE 1 homolog 1 (S. pombe) [Source:MGI Symbol;Acc:MGI:103075]
ENSMUSG00000031532	8429.8	6619.09	0.33367	8.9104e-08	6.0279e-06	Tmem66	protein_coding	store-operated calcium entry-associated regulatory factor [Source:MGI Symbol;Acc:MGI:1915137]
ENSMUSG00000061718	117.326	258.344	-0.7634	9.3006e-08	6.2577e-06	Ppp1r1b	protein_coding	protein phosphatase 1, regulatory (inhibitor) subunit 1B [Source:MGI Symbol;Acc:MGI:94860]
ENSMUSG00000024924	6338.35	4710.71	0.40032	9.7622e-08	6.5327e-06	Vldlr	protein_coding	very low density lipoprotein receptor [Source:MGI Symbol;Acc:MGI:98935]
ENSMUSG00000001930	1301.51	960.99	0.40909	1.0203e-07	6.775e-06	Vwf	protein_coding	Von Willebrand factor homolog [Source:MGI Symbol;Acc:MGI:98941]
ENSMUSG00000030889	126.517	56.3494	0.76876	1.0234e-07	6.775e-06	Vwa3a	protein_coding	von Willebrand factor A domain containing 3A [Source:MGI Symbol;Acc:MGI:3041229]
ENSMUSG00000032526	970.947	1204.79	-0.29969	1.0616e-07	6.9535e-06	Deb1	protein_coding	differentially expressed in B16F10 1 [Source:MGI Symbol;Acc:MGI:1349474]
ENSMUSG00000066026	1777.65	1195.1	0.50983	1.0564e-07	6.9535e-06	Dhrs3	protein_coding	dehydrogenase/reductase (SDR family) member 3 [Source:MGI Symbol;Acc:MGI:1315215]
ENSMUSG00000037129	18.878	50.4111	-0.80071	1.0982e-07	7.1553e-06	Tmprss13	protein_coding	transmembrane protease, serine 13 [Source:MGI Symbol;Acc:MGI:2682935]
ENSMUSG00000008348	4639.67	3387.58	0.42059	1.1141e-07	7.2211e-06	Ubc	protein_coding	ubiquitin C [Source:MGI Symbol;Acc:MGI:98889]
ENSMUSG00000038506	1071.13	1339.55	-0.31026	1.1339e-07	7.3113e-06	Dcun1d2	protein_coding	DCN1, defective in cullin neddylation 1, domain containing 2 (S. cerevisiae) [Source:MGI Symbol;Acc:MGI:2142792]
ENSMUSG00000021824	458.857	581.082	-0.32749	1.3685e-07	8.7642e-06	Ap3m1	protein_coding	adaptor-related protein complex 3, mu 1 subunit [Source:MGI Symbol;Acc:MGI:1929212]
ENSMUSG00000027217	250.542	146.47	0.6276	1.3734e-07	8.7642e-06	Tspan18	protein_coding	tetraspanin 18 [Source:MGI Symbol;Acc:MGI:1917186]
ENSMUSG00000022265	3437.16	4017.72	-0.22119	1.4024e-07	8.9034e-06	Ank	protein_coding	progressive ankylosis [Source:MGI Symbol;Acc:MGI:3045421]
ENSMUSG00000019823	222.882	139.143	0.57387	1.4529e-07	9.1771e-06	Mical1	protein_coding	microtubule associated monooxygenase, calponin and LIM domain containing 1 [Source:MGI Symbol;Acc:MGI:2385847]
ENSMUSG00000025511	452.493	684.005	-0.52356	1.4952e-07	9.3962e-06	Tspan4	protein_coding	tetraspanin 4 [Source:MGI Symbol;Acc:MGI:1928097]
ENSMUSG00000052188	78.7721	38.3334	0.72955	1.6143e-07	1.0094e-05	Gm14964	antisense	predicted gene 14964 [Source:MGI Symbol;Acc:MGI:3641621]
ENSMUSG00000006386	1048.54	802.106	0.36485	1.7054e-07	1.0609e-05	Tek	protein_coding	endothelial-specific receptor tyrosine kinase [Source:MGI Symbol;Acc:MGI:98664]
ENSMUSG00000027601	614.29	780.08	-0.3298	1.7335e-07	1.0731e-05	Mtfr1	protein_coding	mitochondrial fission regulator 1 [Source:MGI Symbol;Acc:MGI:1914722]
ENSMUSG00000001441	1419.9	1782.41	-0.31426	1.8995e-07	1.1584e-05	Npepps	protein_coding	aminopeptidase puromycin sensitive [Source:MGI Symbol;Acc:MGI:1101358]
ENSMUSG00000020684	1733.91	2184.53	-0.3193	1.8977e-07	1.1584e-05	Rasl10b	protein_coding	RAS-like, family 10, member B [Source:MGI Symbol;Acc:MGI:2685575]
ENSMUSG00000028017	128.299	206.753	-0.57945	1.8829e-07	1.1584e-05	Egf	protein_coding	epidermal growth factor [Source:MGI Symbol;Acc:MGI:95290]
ENSMUSG00000024913	1591.41	1271.36	0.31086	1.9166e-07	1.1631e-05	Lrp5	protein_coding	low density lipoprotein receptor-related protein 5 [Source:MGI Symbol;Acc:MGI:1278315]
ENSMUSG00000031791	7116.53	8179.29	-0.19771	2.3056e-07	1.3924e-05	Tmem38a	protein_coding	transmembrane protein 38A [Source:MGI Symbol;Acc:MGI:1921416]
ENSMUSG00000031637	16.2094	39.4024	-0.76951	2.3595e-07	1.418e-05	Lrp2bp	protein_coding	Lrp2 binding protein [Source:MGI Symbol;Acc:MGI:1914870]
ENSMUSG00000074064	5224.36	3183.69	0.59111	2.8947e-07	1.7312e-05	Mlycd	protein_coding	malonyl-CoA decarboxylase [Source:MGI Symbol;Acc:MGI:1928485]
ENSMUSG00000038628	246.241	332.525	-0.40429	2.9354e-07	1.7471e-05	Polr3k	protein_coding	polymerase (RNA) III (DNA directed) polypeptide K [Source:MGI Symbol;Acc:MGI:1914255]
ENSMUSG00000056666	1770.93	1312.07	0.40144	3.0419e-07	1.8019e-05	Retsat	protein_coding	retinol saturase (all trans retinol 13,14 reductase) [Source:MGI Symbol;Acc:MGI:1914692]
ENSMUSG00000046572	129.402	81.7573	0.55864	3.0881e-07	1.8205e-05	Zfp518b	protein_coding	zinc finger protein 518B [Source:MGI Symbol;Acc:MGI:2140750]
ENSMUSG00000016308	596.865	753.757	-0.31967	3.2077e-07	1.882e-05	Ube2a	protein_coding	ubiquitin-conjugating enzyme E2A [Source:MGI Symbol;Acc:MGI:102959]
ENSMUSG00000000276	443.204	310.165	0.45983	3.6662e-07	2.1409e-05	Dgke	protein_coding	diacylglycerol kinase, epsilon [Source:MGI Symbol;Acc:MGI:1889276]
ENSMUSG00000024011	909.897	684.749	0.38495	3.785e-07	2.1999e-05	Pi16	protein_coding	peptidase inhibitor 16 [Source:MGI Symbol;Acc:MGI:1921366]
ENSMUSG00000049134	9980.05	8170.88	0.27894	3.9095e-07	2.2617e-05	Nrap	protein_coding	nebulin-related anchoring protein [Source:MGI Symbol;Acc:MGI:1098765]
ENSMUSG00000021281	592.204	381.772	0.54087	4.0705e-07	2.3439e-05	Tnfaip2	protein_coding	tumor necrosis factor, alpha-induced protein 2 [Source:MGI Symbol;Acc:MGI:104960]
ENSMUSG00000031712	513.699	678.403	-0.37594	4.2513e-07	2.4366e-05	Il15	protein_coding	interleukin 15 [Source:MGI Symbol;Acc:MGI:103014]
ENSMUSG00000057315	549.838	408.194	0.40051	4.2857e-07	2.445e-05	Arhgap24	protein_coding	Rho GTPase activating protein 24 [Source:MGI Symbol;Acc:MGI:1922647]
ENSMUSG00000032788	431.722	570.804	-0.37419	4.314e-07	2.4499e-05	Pdxk	protein_coding	pyridoxal (pyridoxine, vitamin B6) kinase [Source:MGI Symbol;Acc:MGI:1351869]
ENSMUSG00000037443	1170.39	959.639	0.27727	4.5214e-07	2.5559e-05	Cep85	protein_coding	centrosomal protein 85 [Source:MGI Symbol;Acc:MGI:1917262]
ENSMUSG00000039167	993.73	738.019	0.3977	4.5909e-07	2.5834e-05	Eltd1	protein_coding	EGF, latrophilin seven transmembrane domain containing 1 [Source:MGI Symbol;Acc:MGI:2655562]
ENSMUSG00000024048	13517.2	10899.5	0.29835	4.7669e-07	2.6703e-05	Myl12a	protein_coding	myosin, light chain 12A, regulatory, non-sarcomeric [Source:MGI Symbol;Acc:MGI:1914518]
ENSMUSG00000025025	939.411	777.067	0.26525	5.5702e-07	3.1062e-05	Mxi1	protein_coding	Max interacting protein 1 [Source:MGI Symbol;Acc:MGI:97245]
ENSMUSG00000021892	1434.02	1005.53	0.45915	6.0973e-07	3.385e-05	Sh3bp5	protein_coding	SH3-domain binding protein 5 (BTK-associated) [Source:MGI Symbol;Acc:MGI:1344391]
ENSMUSG00000032252	275.239	201.591	0.41274	6.4623e-07	3.5427e-05	Glce	protein_coding	glucuronyl C5-epimerase [Source:MGI Symbol;Acc:MGI:2136405]
ENSMUSG00000038417	1006.74	1286.22	-0.33573	6.4498e-07	3.5427e-05	Fig4	protein_coding	FIG4 homolog (S. cerevisiae) [Source:MGI Symbol;Acc:MGI:2143585]
ENSMUSG00000071856	371.304	265.547	0.43654	6.4673e-07	3.5427e-05	Mcc	protein_coding	mutated in colorectal cancers [Source:MGI Symbol;Acc:MGI:96930]
ENSMUSG00000030513	1259.55	999.308	0.3177	6.9015e-07	3.7639e-05	Pcsk6	protein_coding	proprotein convertase subtilisin/kexin type 6 [Source:MGI Symbol;Acc:MGI:102897]
ENSMUSG00000062515	10999.4	9200.06	0.25027	6.9684e-07	3.7837e-05	Fabp4	protein_coding	fatty acid binding protein 4, adipocyte [Source:MGI Symbol;Acc:MGI:88038]
ENSMUSG00000042628	510.58	368.814	0.426	7.4484e-07	4.0267e-05	Zfyve1	protein_coding	zinc finger, FYVE domain containing 1 [Source:MGI Symbol;Acc:MGI:3026685]
ENSMUSG00000025153	1183.57	553.647	0.71719	7.5372e-07	4.057e-05	Fasn	protein_coding	fatty acid synthase [Source:MGI Symbol;Acc:MGI:95485]
ENSMUSG00000031448	11327.8	9144.86	0.29651	7.6103e-07	4.0786e-05	Adprhl1	protein_coding	ADP-ribosylhydrolase like 1 [Source:MGI Symbol;Acc:MGI:2442168]
ENSMUSG00000001729	3158.81	3736.67	-0.23622	7.8909e-07	4.2107e-05	Akt1	protein_coding	thymoma viral proto-oncogene 1 [Source:MGI Symbol;Acc:MGI:87986]
ENSMUSG00000038712	463.104	352.23	0.37043	7.9306e-07	4.2138e-05	Fam63a	protein_coding	family with sequence similarity 63, member A [Source:MGI Symbol;Acc:MGI:1922257]
ENSMUSG00000049872	99.1297	52.9698	0.66304	8.0031e-07	4.2341e-05	Fam26e	protein_coding	family with sequence similarity 26, member E [Source:MGI Symbol;Acc:MGI:2143897]
ENSMUSG00000020241	1573.6	1257.61	0.30966	8.0451e-07	4.2382e-05	Col6a2	protein_coding	collagen, type VI, alpha 2 [Source:MGI Symbol;Acc:MGI:88460]
ENSMUSG00000038175	716.171	543.422	0.37196	8.4721e-07	4.4442e-05	Mylip	protein_coding	myosin regulatory light chain interacting protein [Source:MGI Symbol;Acc:MGI:2388271]
ENSMUSG00000021957	503.813	366.061	0.42223	8.5155e-07	4.4482e-05	Tkt	protein_coding	transketolase [Source:MGI Symbol;Acc:MGI:105992]
ENSMUSG00000046182	252.363	365.578	-0.47264	8.6546e-07	4.5018e-05	Gsg1l	protein_coding	GSG1-like [Source:MGI Symbol;Acc:MGI:2685483]
ENSMUSG00000024695	1784.4	2142.75	-0.25587	8.6912e-07	4.502e-05	Zfp91	protein_coding	zinc finger protein 91 [Source:MGI Symbol;Acc:MGI:104854]
ENSMUSG00000020079	412.196	524.246	-0.33042	9.1948e-07	4.743e-05	Supv3l1	protein_coding	suppressor of var1, 3-like 1 (S. cerevisiae) [Source:MGI Symbol;Acc:MGI:2441711]
ENSMUSG00000027099	1621.52	2003.53	-0.29351	9.2372e-07	4.7451e-05	Mtx2	protein_coding	metaxin 2 [Source:MGI Symbol;Acc:MGI:1859652]
ENSMUSG00000038670	484.901	336.429	0.4703	9.4851e-07	4.8523e-05	Mybpc2	protein_coding	myosin binding protein C, fast-type [Source:MGI Symbol;Acc:MGI:1336170]
ENSMUSG00000037379	77.2403	30.3151	0.74214	9.8632e-07	5.0249e-05	Spon2	protein_coding	spondin 2, extracellular matrix protein [Source:MGI Symbol;Acc:MGI:1923724]
ENSMUSG00000022964	852.913	1043.95	-0.28118	1.0192e-06	5.171e-05	Tmem50b	protein_coding	transmembrane protein 50B [Source:MGI Symbol;Acc:MGI:1925225]
ENSMUSG00000038319	1933.75	2764.88	-0.46057	1.0466e-06	5.2883e-05	Kcnh2	protein_coding	potassium voltage-gated channel, subfamily H (eag-related), member 2 [Source:MGI Symbol;Acc:MGI:1341722]
ENSMUSG00000006127	894.189	724.766	0.2895	1.0997e-06	5.5343e-05	Inpp5k	protein_coding	inositol polyphosphate 5-phosphatase K [Source:MGI Symbol;Acc:MGI:1194899]
ENSMUSG00000026864	7131.35	9090.21	-0.33162	1.1244e-06	5.6356e-05	Hspa5	protein_coding	heat shock protein 5 [Source:MGI Symbol;Acc:MGI:95835]
ENSMUSG00000055485	251.033	158.012	0.554	1.1303e-06	5.6422e-05	Soga1	protein_coding	suppressor of glucose, autophagy associated 1 [Source:MGI Symbol;Acc:MGI:2444575]
ENSMUSG00000041920	239.966	161.599	0.49792	1.1392e-06	5.664e-05	Slc16a6	protein_coding	solute carrier family 16 (monocarboxylic acid transporters), member 6 [Source:MGI Symbol;Acc:MGI:2144585]
ENSMUSG00000026028	2400.7	3136	-0.36104	1.1674e-06	5.7808e-05	Trak2	protein_coding	trafficking protein, kinesin binding 2 [Source:MGI Symbol;Acc:MGI:1918077]
ENSMUSG00000029430	1840.95	2161.51	-0.22588	1.2162e-06	5.9985e-05	Ran	protein_coding	RAN, member RAS oncogene family [Source:MGI Symbol;Acc:MGI:1333112]
ENSMUSG00000053062	2703.49	3192.49	-0.23342	1.2318e-06	6.0517e-05	Jam2	protein_coding	junction adhesion molecule 2 [Source:MGI Symbol;Acc:MGI:1933820]
ENSMUSG00000021196	893.748	713.415	0.30979	1.2642e-06	6.179e-05	Pfkp	protein_coding	phosphofructokinase, platelet [Source:MGI Symbol;Acc:MGI:1891833]
ENSMUSG00000040479	1211.71	959.372	0.32015	1.2677e-06	6.179e-05	Dgkz	protein_coding	diacylglycerol kinase zeta [Source:MGI Symbol;Acc:MGI:1278339]
ENSMUSG00000027187	5274.05	4350.59	0.26808	1.288e-06	6.2285e-05	Cat	protein_coding	catalase [Source:MGI Symbol;Acc:MGI:88271]
ENSMUSG00000052214	1385.19	1686.94	-0.27406	1.287e-06	6.2285e-05	Opa3	protein_coding	optic atrophy 3 [Source:MGI Symbol;Acc:MGI:2686271]
ENSMUSG00000033191	2244.23	1747.07	0.3406	1.3109e-06	6.3149e-05	Tie1	protein_coding	tyrosine kinase with immunoglobulin-like and EGF-like domains 1 [Source:MGI Symbol;Acc:MGI:99906]
ENSMUSG00000028128	264.397	375.693	-0.45314	1.4076e-06	6.7541e-05	F3	protein_coding	coagulation factor III [Source:MGI Symbol;Acc:MGI:88381]
ENSMUSG00000022489	52.2792	24.191	0.70235	1.439e-06	6.8516e-05	Pde1b	protein_coding	phosphodiesterase 1B, Ca2+-calmodulin dependent [Source:MGI Symbol;Acc:MGI:97523]
ENSMUSG00000027765	539.416	678.323	-0.31405	1.4445e-06	6.8516e-05	P2ry1	protein_coding	purinergic receptor P2Y, G-protein coupled 1 [Source:MGI Symbol;Acc:MGI:105049]
ENSMUSG00000039461	1627.67	1356.71	0.25353	1.4394e-06	6.8516e-05	Tcta	protein_coding	T cell leukemia translocation altered gene [Source:MGI Symbol;Acc:MGI:1918829]
ENSMUSG00000030653	1202.86	962.386	0.30662	1.4623e-06	6.897e-05	Pde2a	protein_coding	phosphodiesterase 2A, cGMP-stimulated [Source:MGI Symbol;Acc:MGI:2446107]
ENSMUSG00000066621	1164.08	909.876	0.33563	1.4652e-06	6.897e-05	Tecpr1	protein_coding	tectonin beta-propeller repeat containing 1 [Source:MGI Symbol;Acc:MGI:1917631]
ENSMUSG00000049550	4589.46	3303.39	0.4297	1.4823e-06	6.9512e-05	Clip1	protein_coding	CAP-GLY domain containing linker protein 1 [Source:MGI Symbol;Acc:MGI:1928401]
ENSMUSG00000025940	1842.03	2200.16	-0.24864	1.4967e-06	6.992e-05	Tmem70	protein_coding	transmembrane protein 70 [Source:MGI Symbol;Acc:MGI:1915068]
ENSMUSG00000046947	268.302	174.561	0.52529	1.5505e-06	7.2163e-05	Adck2	protein_coding	aarF domain containing kinase 2 [Source:MGI Symbol;Acc:MGI:1889336]
ENSMUSG00000022965	2417.61	3069.07	-0.32661	1.5724e-06	7.2907e-05	Ifngr2	protein_coding	interferon gamma receptor 2 [Source:MGI Symbol;Acc:MGI:107654]
ENSMUSG00000038393	13436.6	6686.08	0.6832	1.5996e-06	7.389e-05	Txnip	protein_coding	thioredoxin interacting protein [Source:MGI Symbol;Acc:MGI:1889549]
ENSMUSG00000018427	508.044	331.687	0.52233	1.6464e-06	7.5773e-05	Ypel2	protein_coding	yippee-like 2 (Drosophila) [Source:MGI Symbol;Acc:MGI:1925114]
ENSMUSG00000003382	578.642	454.987	0.32647	1.6767e-06	7.6397e-05	Etv3	protein_coding	ets variant 3 [Source:MGI Symbol;Acc:MGI:1350926]
ENSMUSG00000022634	387.175	495.123	-0.33673	1.6718e-06	7.6397e-05	Yaf2	protein_coding	YY1 associated factor 2 [Source:MGI Symbol;Acc:MGI:1914307]
ENSMUSG00000030609	610.538	768.688	-0.3167	1.6836e-06	7.6397e-05	Aen	protein_coding	apoptosis enhancing nuclease [Source:MGI Symbol;Acc:MGI:1915298]
ENSMUSG00000038520	953.072	694.86	0.41418	1.6847e-06	7.6397e-05	Tbc1d17	protein_coding	TBC1 domain family, member 17 [Source:MGI Symbol;Acc:MGI:2449973]
ENSMUSG00000032531	1871.72	1324.41	0.44658	1.7127e-06	7.7382e-05	Amotl2	protein_coding	angiomotin-like 2 [Source:MGI Symbol;Acc:MGI:1929286]
ENSMUSG00000033174	3449.97	2683.2	0.34144	1.8307e-06	8.2117e-05	Mgll	protein_coding	monoglyceride lipase [Source:MGI Symbol;Acc:MGI:1346042]
ENSMUSG00000042425	33.2795	63.3446	-0.66052	1.8297e-06	8.2117e-05	Frmpd3	protein_coding	FERM and PDZ domain containing 3 [Source:MGI Symbol;Acc:MGI:3646547]
ENSMUSG00000078486	4022.47	4994.29	-0.29833	1.8498e-06	8.2673e-05	Perm1	protein_coding	PPARGC1 and ESRR induced regulator, muscle 1 [Source:MGI Symbol;Acc:MGI:1921433]
ENSMUSG00000014470	849.802	1209.83	-0.45409	1.9789e-06	8.8124e-05	Rnf166	protein_coding	ring finger protein 166 [Source:MGI Symbol;Acc:MGI:1915968]
ENSMUSG00000031490	2599.17	2052.98	0.32244	2.0096e-06	8.8743e-05	Eif4ebp1	protein_coding	eukaryotic translation initiation factor 4E binding protein 1 [Source:MGI Symbol;Acc:MGI:103267]
ENSMUSG00000037362	227.465	144.646	0.54481	2.0143e-06	8.8743e-05	Nov	protein_coding	nephroblastoma overexpressed gene [Source:MGI Symbol;Acc:MGI:109185]
ENSMUSG00000072720	4594.11	3901.97	0.22971	2.0039e-06	8.8743e-05	Myo18b	protein_coding	myosin XVIIIb [Source:MGI Symbol;Acc:MGI:1921626]
ENSMUSG00000032370	355.276	456.597	-0.34145	2.1536e-06	9.4546e-05	Lactb	protein_coding	lactamase, beta [Source:MGI Symbol;Acc:MGI:1933395]
ENSMUSG00000003469	395.908	576.86	-0.47531	2.2023e-06	9.6343e-05	Phyhip	protein_coding	phytanoyl-CoA hydroxylase interacting protein [Source:MGI Symbol;Acc:MGI:1860417]
ENSMUSG00000051469	462.067	595.067	-0.34334	2.2779e-06	9.9296e-05	Zfp191	protein_coding	zinc finger protein 191 [Source:MGI Symbol;Acc:MGI:1929704]
ENSMUSG00000039382	743.64	577.608	0.34206	2.3166e-06	0.00010052	Wdr45	protein_coding	WD repeat domain 45 [Source:MGI Symbol;Acc:MGI:1859606]
ENSMUSG00000086938	273.063	169.178	0.5638	2.3221e-06	0.00010052	4930481A15Rik	protein_coding	RIKEN cDNA 4930481A15 gene [Source:MGI Symbol;Acc:MGI:1922181]
ENSMUSG00000021816	1277.94	1541.57	-0.26173	2.3402e-06	0.00010095	Ppp3cb	protein_coding	protein phosphatase 3, catalytic subunit, beta isoform [Source:MGI Symbol;Acc:MGI:107163]
ENSMUSG00000028690	593.808	765.478	-0.34427	2.3648e-06	0.00010165	Mmachc	protein_coding	methylmalonic aciduria cblC type, with homocystinuria [Source:MGI Symbol;Acc:MGI:1914346]
ENSMUSG00000020641	364.121	207.082	0.61532	2.4051e-06	0.00010267	Rsad2	protein_coding	radical S-adenosyl methionine domain containing 2 [Source:MGI Symbol;Acc:MGI:1929628]
ENSMUSG00000051154	859.805	1057.05	-0.28538	2.4009e-06	0.00010267	Commd3	protein_coding	COMM domain containing 3 [Source:MGI Symbol;Acc:MGI:88218]
ENSMUSG00000026914	597.478	751.452	-0.31476	2.4532e-06	0.00010436	Psmd14	protein_coding	proteasome (prosome, macropain) 26S subunit, non-ATPase, 14 [Source:MGI Symbol;Acc:MGI:1913284]
ENSMUSG00000034647	221.532	329.987	-0.49588	2.4616e-06	0.00010437	Ankrd12	protein_coding	ankyrin repeat domain 12 [Source:MGI Symbol;Acc:MGI:1914357]
ENSMUSG00000006920	1063.29	793.592	0.3883	2.4704e-06	0.00010438	Ezh1	protein_coding	enhancer of zeste homolog 1 (Drosophila) [Source:MGI Symbol;Acc:MGI:1097695]
ENSMUSG00000031438	880.261	1132.46	-0.34106	2.5069e-06	0.00010556	Rnf128	protein_coding	ring finger protein 128 [Source:MGI Symbol;Acc:MGI:1914139]
ENSMUSG00000022817	3018.54	2506.15	0.25912	2.5356e-06	0.00010641	Itgb5	protein_coding	integrin beta 5 [Source:MGI Symbol;Acc:MGI:96614]
ENSMUSG00000032702	1270.64	1041.53	0.27612	2.6083e-06	0.00010909	Kank1	protein_coding	KN motif and ankyrin repeat domains 1 [Source:MGI Symbol;Acc:MGI:2147707]
ENSMUSG00000066894	198.776	136.945	0.46589	2.9827e-06	0.00012433	Vsig10	protein_coding	V-set and immunoglobulin domain containing 10 [Source:MGI Symbol;Acc:MGI:2448533]
ENSMUSG00000044951	2384.54	3848.54	-0.55922	2.9951e-06	0.00012443	Mylk4	protein_coding	myosin light chain kinase family, member 4 [Source:MGI Symbol;Acc:MGI:3643758]
ENSMUSG00000028957	339.822	552.535	-0.56401	3.0092e-06	0.0001246	Per3	protein_coding	period circadian clock 3 [Source:MGI Symbol;Acc:MGI:1277134]
ENSMUSG00000022032	644.383	465.887	0.42172	3.0648e-06	0.00012644	Scara5	protein_coding	scavenger receptor class A, member 5 (putative) [Source:MGI Symbol;Acc:MGI:1918395]
ENSMUSG00000047746	3905.63	3105.24	0.31405	3.0742e-06	0.00012644	Fbxo40	protein_coding	F-box protein 40 [Source:MGI Symbol;Acc:MGI:2443753]
ENSMUSG00000052539	729.04	993.725	-0.40675	3.1284e-06	0.00012824	Magi3	protein_coding	membrane associated guanylate kinase, WW and PDZ domain containing 3 [Source:MGI Symbol;Acc:MGI:1923484]
ENSMUSG00000075232	1571.42	2438.73	-0.52807	3.4223e-06	0.00013983	Amd1	protein_coding	S-adenosylmethionine decarboxylase 1 [Source:MGI Symbol;Acc:MGI:88004]
ENSMUSG00000032845	2197.07	1750.32	0.31148	3.5575e-06	0.00014488	Alpk2	protein_coding	alpha-kinase 2 [Source:MGI Symbol;Acc:MGI:2449492]
ENSMUSG00000033610	1479.43	1231.47	0.25504	3.6068e-06	0.0001464	Pank1	protein_coding	pantothenate kinase 1 [Source:MGI Symbol;Acc:MGI:1922985]
ENSMUSG00000027274	1230.79	1486.86	-0.26288	3.6958e-06	0.00014952	Mkks	protein_coding	McKusick-Kaufman syndrome [Source:MGI Symbol;Acc:MGI:1891836]
ENSMUSG00000057530	1876.01	1579.74	0.24043	3.756e-06	0.00015146	Ece1	protein_coding	endothelin converting enzyme 1 [Source:MGI Symbol;Acc:MGI:1101357]
ENSMUSG00000078427	792.891	968.403	-0.27654	4.1204e-06	0.00016562	Sarnp	protein_coding	SAP domain containing ribonucleoprotein [Source:MGI Symbol;Acc:MGI:1913368]
ENSMUSG00000018167	494.351	685.025	-0.42259	4.1645e-06	0.00016685	Stard3	protein_coding	START domain containing 3 [Source:MGI Symbol;Acc:MGI:1929618]
ENSMUSG00000068290	1980.06	1693.47	0.2204	4.2264e-06	0.00016878	Ddrgk1	protein_coding	DDRGK domain containing 1 [Source:MGI Symbol;Acc:MGI:1924256]
ENSMUSG00000078429	3711.16	2963.26	0.30756	4.5644e-06	0.00018169	Ctdsp2	protein_coding	CTD (carboxy-terminal domain, RNA polymerase II, polypeptide A) small phosphatase 2 [Source:MGI Symbol;Acc:MGI:1098748]
ENSMUSG00000025408	249.718	370.568	-0.48823	4.7167e-06	0.00018715	Ddit3	protein_coding	DNA-damage inducible transcript 3 [Source:MGI Symbol;Acc:MGI:109247]
ENSMUSG00000048583	1196.56	854.882	0.43302	4.7592e-06	0.00018824	Igf2	protein_coding	insulin-like growth factor 2 [Source:MGI Symbol;Acc:MGI:96434]
ENSMUSG00000039976	1302.79	1581.24	-0.2683	4.8624e-06	0.00019171	Tbc1d16	protein_coding	TBC1 domain family, member 16 [Source:MGI Symbol;Acc:MGI:2652878]
ENSMUSG00000040249	3107.15	2642.09	0.2282	5.004e-06	0.00019667	Lrp1	protein_coding	low density lipoprotein receptor-related protein 1 [Source:MGI Symbol;Acc:MGI:96828]
ENSMUSG00000035606	204.758	365.378	-0.61448	5.0993e-06	0.00019978	Ky	protein_coding	kyphoscoliosis peptidase [Source:MGI Symbol;Acc:MGI:96709]
ENSMUSG00000011305	3526.08	2274.31	0.5236	5.3887e-06	0.00020979	Plin5	protein_coding	perilipin 5 [Source:MGI Symbol;Acc:MGI:1914218]
ENSMUSG00000020843	492.286	627.718	-0.33078	5.3796e-06	0.00020979	Timm22	protein_coding	translocase of inner mitochondrial membrane 22 [Source:MGI Symbol;Acc:MGI:1929742]
ENSMUSG00000003031	994	784.448	0.32168	5.4957e-06	0.00021328	Cdkn1b	protein_coding	cyclin-dependent kinase inhibitor 1B [Source:MGI Symbol;Acc:MGI:104565]
ENSMUSG00000046447	902.353	736.882	0.28106	5.5262e-06	0.0002138	Camk2n1	protein_coding	calcium/calmodulin-dependent protein kinase II inhibitor 1 [Source:MGI Symbol;Acc:MGI:1913509]
ENSMUSG00000024087	276.274	165.801	0.57355	5.7006e-06	0.00021985	Cyp1b1	protein_coding	cytochrome P450, family 1, subfamily b, polypeptide 1 [Source:MGI Symbol;Acc:MGI:88590]
ENSMUSG00000002661	770.17	953.276	-0.29247	5.8634e-06	0.00022473	Alkbh7	protein_coding	alkB, alkylation repair homolog 7 (E. coli) [Source:MGI Symbol;Acc:MGI:1913650]
ENSMUSG00000022040	6588.95	5412.77	0.27219	5.8621e-06	0.00022473	Ephx2	protein_coding	epoxide hydrolase 2, cytoplasmic [Source:MGI Symbol;Acc:MGI:99500]
ENSMUSG00000068735	514.655	370.369	0.42587	5.9614e-06	0.00022779	Trp53i11	protein_coding	transformation related protein 53 inducible protein 11 [Source:MGI Symbol;Acc:MGI:2670995]
ENSMUSG00000024099	8020.95	9195.28	-0.19311	6.0438e-06	0.00023022	Ndufv2	protein_coding	NADH dehydrogenase (ubiquinone) flavoprotein 2 [Source:MGI Symbol;Acc:MGI:1920150]
ENSMUSG00000078532	102.77	156.54	-0.50652	6.1868e-06	0.00023495	Nkain1	protein_coding	Na+/K+ transporting ATPase interacting 1 [Source:MGI Symbol;Acc:MGI:1914399]
ENSMUSG00000058638	540.667	417.613	0.34392	6.3467e-06	0.00024028	Zfp110	protein_coding	zinc finger protein 110 [Source:MGI Symbol;Acc:MGI:1890378]
ENSMUSG00000030357	6170.23	7644.05	-0.29415	6.4415e-06	0.00024313	Fkbp4	protein_coding	FK506 binding protein 4 [Source:MGI Symbol;Acc:MGI:95543]
ENSMUSG00000009633	564.842	914.182	-0.55335	6.5387e-06	0.00024605	G0s2	protein_coding	G0/G1 switch gene 2 [Source:MGI Symbol;Acc:MGI:1316737]
ENSMUSG00000079658	1066.05	1278.76	-0.25321	6.6026e-06	0.0002477	Tceb1	protein_coding	transcription elongation factor B (SIII), polypeptide 1 [Source:MGI Symbol;Acc:MGI:1915173]
ENSMUSG00000022748	672.802	832.197	-0.29147	6.6505e-06	0.00024874	Cmss1	protein_coding	cms small ribosomal subunit 1 [Source:MGI Symbol;Acc:MGI:1913747]
ENSMUSG00000028035	1841.05	2418.4	-0.36354	6.7155e-06	0.00025042	Dnajb4	protein_coding	DnaJ (Hsp40) homolog, subfamily B, member 4 [Source:MGI Symbol;Acc:MGI:1914285]
ENSMUSG00000030094	325.086	246.533	0.36571	6.7454e-06	0.00025078	Xpc	protein_coding	xeroderma pigmentosum, complementation group C [Source:MGI Symbol;Acc:MGI:103557]
ENSMUSG00000071001	125.823	75.6771	0.56779	6.8134e-06	0.00025255	Hrct1	protein_coding	histidine rich carboxyl terminus 1 [Source:MGI Symbol;Acc:MGI:1917945]
ENSMUSG00000001435	424.453	305.615	0.42338	6.8386e-06	0.00025272	Col18a1	protein_coding	collagen, type XVIII, alpha 1 [Source:MGI Symbol;Acc:MGI:88451]
ENSMUSG00000023977	2436.07	1833.12	0.37677	6.8605e-06	0.00025278	Ubr2	protein_coding	ubiquitin protein ligase E3 component n-recognin 2 [Source:MGI Symbol;Acc:MGI:1861099]
ENSMUSG00000019947	187.358	116.444	0.54742	7.1643e-06	0.00026319	Arid5b	protein_coding	AT rich interactive domain 5B (MRF1-like) [Source:MGI Symbol;Acc:MGI:2175912]
ENSMUSG00000019864	940.632	1206.65	-0.3364	7.2843e-06	0.00026681	Rtn4ip1	protein_coding	reticulon 4 interacting protein 1 [Source:MGI Symbol;Acc:MGI:2178759]
ENSMUSG00000078713	1552.14	1900.53	-0.27893	7.4207e-06	0.000271	Tomm5	protein_coding	translocase of outer mitochondrial membrane 5 homolog (yeast) [Source:MGI Symbol;Acc:MGI:1915762]
ENSMUSG00000035373	9.93363	42.9193	-0.64017	7.4982e-06	0.00027302	Ccl7	protein_coding	chemokine (C-C motif) ligand 7 [Source:MGI Symbol;Acc:MGI:99512]
ENSMUSG00000043811	16.7692	42.5051	-0.68234	7.5827e-06	0.00027464	Rtn4r	protein_coding	reticulon 4 receptor [Source:MGI Symbol;Acc:MGI:2136886]
ENSMUSG00000066306	1680.73	1406.49	0.24884	7.5868e-06	0.00027464	Numa1	protein_coding	nuclear mitotic apparatus protein 1 [Source:MGI Symbol;Acc:MGI:2443665]
ENSMUSG00000043085	324.076	200.224	0.55255	7.6775e-06	0.00027711	Tmem82	protein_coding	transmembrane protein 82 [Source:MGI Symbol;Acc:MGI:2384869]
ENSMUSG00000031987	6401.19	7635.11	-0.24587	7.7182e-06	0.00027777	Egln1	protein_coding	egl-9 family hypoxia-inducible factor 1 [Source:MGI Symbol;Acc:MGI:1932286]
ENSMUSG00000046671	2335.28	2736.22	-0.22207	7.9324e-06	0.00028465	Mtfr1l	protein_coding	mitochondrial fission regulator 1-like [Source:MGI Symbol;Acc:MGI:1924074]
ENSMUSG00000076612	141.155	246.693	-0.59492	7.9637e-06	0.00028495	Ighg2c	protein_coding	immunoglobulin heavy constant gamma 2C [Source:MGI Symbol;Acc:MGI:2686979]
ENSMUSG00000063694	21936.2	25713.4	-0.22292	8.2514e-06	0.00029439	Cycs	protein_coding	cytochrome c, somatic [Source:MGI Symbol;Acc:MGI:88578]
ENSMUSG00000012428	848.861	659.071	0.3401	8.3237e-06	0.00029442	Steap4	protein_coding	STEAP family member 4 [Source:MGI Symbol;Acc:MGI:1923560]
ENSMUSG00000032816	291.297	374.594	-0.33824	8.3199e-06	0.00029442	Igdcc4	protein_coding	immunoglobulin superfamily, DCC subclass, member 4 [Source:MGI Symbol;Acc:MGI:1858497]
ENSMUSG00000040270	111.25	62.6773	0.6019	8.3088e-06	0.00029442	Bach2	protein_coding	BTB and CNC homology 2 [Source:MGI Symbol;Acc:MGI:894679]
ENSMUSG00000000326	3229.13	2528.75	0.33034	8.3832e-06	0.00029568	Comt	protein_coding	catechol-O-methyltransferase [Source:MGI Symbol;Acc:MGI:88470]
ENSMUSG00000020178	288.55	201.073	0.45389	8.4233e-06	0.00029625	Adora2a	protein_coding	adenosine A2a receptor [Source:MGI Symbol;Acc:MGI:99402]
ENSMUSG00000038216	16.4087	38.0813	-0.67361	8.4876e-06	0.00029719	Pnmt	protein_coding	phenylethanolamine-N-methyltransferase [Source:MGI Symbol;Acc:MGI:97724]
ENSMUSG00000048490	419.571	304.889	0.41066	8.498e-06	0.00029719	Nrip1	protein_coding	nuclear receptor interacting protein 1 [Source:MGI Symbol;Acc:MGI:1315213]
ENSMUSG00000068566	2419.08	2871.72	-0.23878	8.6334e-06	0.00030107	Myadm	protein_coding	myeloid-associated differentiation marker [Source:MGI Symbol;Acc:MGI:1355332]
ENSMUSG00000059325	3150.75	3821.87	-0.26738	8.8622e-06	0.00030819	Hopx	protein_coding	HOP homeobox [Source:MGI Symbol;Acc:MGI:1916782]
ENSMUSG00000005534	2942.85	2242.04	0.36241	8.9564e-06	0.00031059	Insr	protein_coding	insulin receptor [Source:MGI Symbol;Acc:MGI:96575]
ENSMUSG00000051234	1239.42	1443.77	-0.21455	8.9992e-06	0.0003112	Rnf7	protein_coding	ring finger protein 7 [Source:MGI Symbol;Acc:MGI:1337096]
ENSMUSG00000075700	2704.33	3168.02	-0.22202	9.1335e-06	0.00031497	Selt	protein_coding	selenoprotein T [Source:MGI Symbol;Acc:MGI:1916477]
ENSMUSG00000020149	2430.48	2779.91	-0.18971	9.2235e-06	0.00031719	Rab1	protein_coding	RAB1, member RAS oncogene family [Source:MGI Symbol;Acc:MGI:97842]
ENSMUSG00000006587	66.8587	125.26	-0.6254	9.2983e-06	0.00031811	Snai3	protein_coding	snail family zinc finger 3 [Source:MGI Symbol;Acc:MGI:1353563]
ENSMUSG00000024617	1039.91	1257.68	-0.26288	9.3019e-06	0.00031811	Camk2a	protein_coding	calcium/calmodulin-dependent protein kinase II alpha [Source:MGI Symbol;Acc:MGI:88256]
ENSMUSG00000036944	254.929	181.334	0.43042	9.4748e-06	0.00032049	Tmem71	protein_coding	transmembrane protein 71 [Source:MGI Symbol;Acc:MGI:2146049]
ENSMUSG00000040850	3204.47	4228.02	-0.3678	9.4351e-06	0.00032049	Psme4	protein_coding	proteasome (prosome, macropain) activator subunit 4 [Source:MGI Symbol;Acc:MGI:2143994]
ENSMUSG00000045160	2264.62	2768.46	-0.27773	9.4718e-06	0.00032049	Bola3	protein_coding	bolA-like 3 (E. coli) [Source:MGI Symbol;Acc:MGI:1925903]
ENSMUSG00000073608	72.8903	112.012	-0.51357	9.406e-06	0.00032049	Gm6086	protein_coding	predicted gene 6086 [Source:MGI Symbol;Acc:MGI:3646771]
ENSMUSG00000011958	1437.17	1679.58	-0.21876	9.6559e-06	0.00032572	Bnip2	protein_coding	BCL2/adenovirus E1B interacting protein 2 [Source:MGI Symbol;Acc:MGI:109327]
ENSMUSG00000020268	237.883	331.408	-0.4257	9.8832e-06	0.00033158	Lyrm7	protein_coding	LYR motif containing 7 [Source:MGI Symbol;Acc:MGI:1922780]
ENSMUSG00000035849	337.914	455.339	-0.39351	9.8574e-06	0.00033158	Krt222	protein_coding	keratin 222 [Source:MGI Symbol;Acc:MGI:2442728]
ENSMUSG00000030751	1920.88	2238.74	-0.21545	9.927e-06	0.00033215	Psma1	protein_coding	proteasome (prosome, macropain) subunit, alpha type 1 [Source:MGI Symbol;Acc:MGI:1347005]
ENSMUSG00000027108	579.222	730.778	-0.31723	1.0122e-05	0.00033684	Ola1	protein_coding	Obg-like ATPase 1 [Source:MGI Symbol;Acc:MGI:1914309]
ENSMUSG00000031111	407.558	574.182	-0.43617	1.0109e-05	0.00033684	Igsf1	protein_coding	immunoglobulin superfamily, member 1 [Source:MGI Symbol;Acc:MGI:2147913]
ENSMUSG00000036617	836.354	652.333	0.33496	1.0234e-05	0.00033967	Etl4	protein_coding	enhancer trap locus 4 [Source:MGI Symbol;Acc:MGI:95454]
ENSMUSG00000020309	164.856	224.314	-0.39867	1.0436e-05	0.00034362	Chac2	protein_coding	ChaC, cation transport regulator 2 [Source:MGI Symbol;Acc:MGI:1915294]
ENSMUSG00000050565	966.767	1153.84	-0.24569	1.0411e-05	0.00034362	Tor1aip2	protein_coding	torsin A interacting protein 2 [Source:MGI Symbol;Acc:MGI:3582695]
ENSMUSG00000057914	687.034	938.862	-0.4051	1.042e-05	0.00034362	Cacnb2	protein_coding	calcium channel, voltage-dependent, beta 2 subunit [Source:MGI Symbol;Acc:MGI:894644]
ENSMUSG00000083012	1631.45	1256.82	0.34843	1.0946e-05	0.00035944	Fam220a	protein_coding	family with sequence similarity 220, member A [Source:MGI Symbol;Acc:MGI:1914488]
ENSMUSG00000000126	204.259	137.789	0.47915	1.1e-05	0.00036026	Wnt9a	protein_coding	wingless-type MMTV integration site family, member 9A [Source:MGI Symbol;Acc:MGI:2446084]
ENSMUSG00000000957	493.349	319.334	0.51347	1.1218e-05	0.00036643	Mmp14	protein_coding	matrix metallopeptidase 14 (membrane-inserted) [Source:MGI Symbol;Acc:MGI:101900]
ENSMUSG00000057137	77.1202	44.3435	0.59182	1.1445e-05	0.00037285	Tmem140	protein_coding	transmembrane protein 140 [Source:MGI Symbol;Acc:MGI:1915737]
ENSMUSG00000017677	298.741	221.192	0.39309	1.1893e-05	0.00038443	Wsb1	protein_coding	WD repeat and SOCS box-containing 1 [Source:MGI Symbol;Acc:MGI:1926139]
ENSMUSG00000027204	781.356	488.934	0.53788	1.1851e-05	0.00038443	Fbn1	protein_coding	fibrillin 1 [Source:MGI Symbol;Acc:MGI:95489]
ENSMUSG00000036932	1918.47	2226.75	-0.2105	1.1867e-05	0.00038443	Aifm1	protein_coding	apoptosis-inducing factor, mitochondrion-associated 1 [Source:MGI Symbol;Acc:MGI:1349419]
ENSMUSG00000033159	921.25	747.514	0.2868	1.2412e-05	0.00040016	Cnppd1	protein_coding	cyclin Pas1/PHO80 domain containing 1 [Source:MGI Symbol;Acc:MGI:1916421]
ENSMUSG00000027834	127.944	191.891	-0.48919	1.2626e-05	0.000406	Serpini1	protein_coding	serine (or cysteine) peptidase inhibitor, clade I, member 1 [Source:MGI Symbol;Acc:MGI:1194506]
ENSMUSG00000058655	4691.98	4026.73	0.21466	1.2812e-05	0.00040986	Eif4b	protein_coding	eukaryotic translation initiation factor 4B [Source:MGI Symbol;Acc:MGI:95304]
ENSMUSG00000090935	683.536	832.522	-0.27114	1.2806e-05	0.00040986	Synj2bp	protein_coding	synaptojanin 2 binding protein [Source:MGI Symbol;Acc:MGI:1344347]
ENSMUSG00000005873	5347.43	6261.1	-0.22116	1.3093e-05	0.00041776	Reep5	protein_coding	receptor accessory protein 5 [Source:MGI Symbol;Acc:MGI:1270152]
ENSMUSG00000029641	39.7089	16.9167	0.66213	1.315e-05	0.00041851	Rasl11a	protein_coding	RAS-like, family 11, member A [Source:MGI Symbol;Acc:MGI:1916145]
ENSMUSG00000020717	3217.94	2671.91	0.2578	1.3296e-05	0.00042205	Pecam1	protein_coding	platelet/endothelial cell adhesion molecule 1 [Source:MGI Symbol;Acc:MGI:97537]
ENSMUSG00000022620	262.818	201.16	0.35603	1.3357e-05	0.00042291	Arsa	protein_coding	arylsulfatase A [Source:MGI Symbol;Acc:MGI:88077]
ENSMUSG00000024236	4609.4	3822	0.25951	1.3469e-05	0.00042538	Svil	protein_coding	supervillin [Source:MGI Symbol;Acc:MGI:2147319]
ENSMUSG00000029438	391.105	293.53	0.37701	1.3743e-05	0.00043292	Bcl7a	protein_coding	B cell CLL/lymphoma 7A [Source:MGI Symbol;Acc:MGI:1924295]
ENSMUSG00000023026	479.798	594.391	-0.29518	1.3866e-05	0.0004357	Dip2b	protein_coding	DIP2 disco-interacting protein 2 homolog B (Drosophila) [Source:MGI Symbol;Acc:MGI:2145977]
ENSMUSG00000037661	77.0617	44.2862	0.58506	1.4052e-05	0.00044041	Gpr160	protein_coding	G protein-coupled receptor 160 [Source:MGI Symbol;Acc:MGI:1919112]
ENSMUSG00000029385	489.172	371.733	0.3613	1.4238e-05	0.00044512	Ccng2	protein_coding	cyclin G2 [Source:MGI Symbol;Acc:MGI:1095734]
ENSMUSG00000079418	185.65	247.725	-0.38051	1.4526e-05	0.00045297	Atg4a	protein_coding	autophagy related 4A, cysteine peptidase [Source:MGI Symbol;Acc:MGI:2147903]
ENSMUSG00000018965	1456.4	1761.92	-0.26291	1.4581e-05	0.00045356	Ywhah	protein_coding	tyrosine 3-monooxygenase/tryptophan 5-monooxygenase activation protein, eta polypeptide [Source:MGI Symbol;Acc:MGI:109194]
ENSMUSG00000020386	2153.07	2501.86	-0.2113	1.5191e-05	0.00047015	Sar1b	protein_coding	SAR1 gene homolog B (S. cerevisiae) [Source:MGI Symbol;Acc:MGI:1913647]
ENSMUSG00000021518	978.178	1144.18	-0.21927	1.5179e-05	0.00047015	Ptdss1	protein_coding	phosphatidylserine synthase 1 [Source:MGI Symbol;Acc:MGI:1276575]
ENSMUSG00000026235	698.406	941.426	-0.38858	1.5574e-05	0.0004808	Epha4	protein_coding	Eph receptor A4 [Source:MGI Symbol;Acc:MGI:98277]
ENSMUSG00000024059	2520.08	3045.5	-0.26201	1.5814e-05	0.0004846	Clip4	protein_coding	CAP-GLY domain containing linker protein family, member 4 [Source:MGI Symbol;Acc:MGI:1919100]
ENSMUSG00000031812	4332	3744.53	0.20473	1.5762e-05	0.0004846	Map1lc3b	protein_coding	microtubule-associated protein 1 light chain 3 beta [Source:MGI Symbol;Acc:MGI:1914693]
ENSMUSG00000046275	125.585	79.6862	0.52804	1.5775e-05	0.0004846	Tusc5	protein_coding	tumor suppressor candidate 5 [Source:MGI Symbol;Acc:MGI:3029307]
ENSMUSG00000020676	61.535	104.175	-0.56906	1.6372e-05	0.00050046	Ccl11	protein_coding	chemokine (C-C motif) ligand 11 [Source:MGI Symbol;Acc:MGI:103576]
ENSMUSG00000026932	449	556.516	-0.29209	1.6456e-05	0.0005018	Nacc2	protein_coding	nucleus accumbens associated 2, BEN and BTB (POZ) domain containing [Source:MGI Symbol;Acc:MGI:1915241]
ENSMUSG00000037049	2317.96	2816.46	-0.26873	1.6762e-05	0.00050986	Smpd1	protein_coding	sphingomyelin phosphodiesterase 1, acid lysosomal [Source:MGI Symbol;Acc:MGI:98325]
ENSMUSG00000019996	524.63	398.397	0.36263	1.6897e-05	0.00051271	Map7	protein_coding	microtubule-associated protein 7 [Source:MGI Symbol;Acc:MGI:1328328]
ENSMUSG00000013089	466.106	302.885	0.50789	1.7074e-05	0.00051681	Etv5	protein_coding	ets variant 5 [Source:MGI Symbol;Acc:MGI:1096867]
ENSMUSG00000044018	1100.91	1303.56	-0.23464	1.7236e-05	0.00051971	Mrpl50	protein_coding	mitochondrial ribosomal protein L50 [Source:MGI Symbol;Acc:MGI:107329]
ENSMUSG00000069844	338.04	425.029	-0.31166	1.7254e-05	0.00051971	Sco1	protein_coding	SCO cytochrome oxidase deficient homolog 1 (yeast) [Source:MGI Symbol;Acc:MGI:106362]
ENSMUSG00000030255	4344.8	4832.83	-0.15161	1.7578e-05	0.0005282	Sspn	protein_coding	sarcospan [Source:MGI Symbol;Acc:MGI:1353511]
ENSMUSG00000090952	52.0102	27.5362	0.6115	1.7657e-05	0.00052928	Gm17251	processed_transcript	predicted gene, 17251 [Source:MGI Symbol;Acc:MGI:4936885]
ENSMUSG00000063275	495.583	681.462	-0.40908	1.7705e-05	0.00052945	Ptpla	protein_coding	protein tyrosine phosphatase-like (proline instead of catalytic arginine), member a [Source:MGI Symbol;Acc:MGI:1353592]
ENSMUSG00000024900	1258.62	839.555	0.48623	1.7911e-05	0.00053431	Cpt1a	protein_coding	carnitine palmitoyltransferase 1a, liver [Source:MGI Symbol;Acc:MGI:1098296]
ENSMUSG00000044221	3133.46	3583.71	-0.18966	1.8006e-05	0.00053586	Grsf1	protein_coding	G-rich RNA sequence binding factor 1 [Source:MGI Symbol;Acc:MGI:106479]
ENSMUSG00000031983	1708.07	1306.11	0.35559	1.8512e-05	0.00054959	2310022B05Rik	protein_coding	RIKEN cDNA 2310022B05 gene [Source:MGI Symbol;Acc:MGI:1916801]
ENSMUSG00000027305	683.966	870.482	-0.32461	1.8942e-05	0.00056101	Ndufaf1	protein_coding	NADH dehydrogenase (ubiquinone) 1 alpha subcomplex, assembly factor 1 [Source:MGI Symbol;Acc:MGI:1916952]
ENSMUSG00000019837	340.038	428.468	-0.31156	1.9304e-05	0.00057036	Gtf3c6	protein_coding	general transcription factor IIIC, polypeptide 6, alpha [Source:MGI Symbol;Acc:MGI:1914621]
ENSMUSG00000029669	416.928	553.215	-0.37185	1.9387e-05	0.00057144	Tspan12	protein_coding	tetraspanin 12 [Source:MGI Symbol;Acc:MGI:1889818]
ENSMUSG00000055027	7612.29	9071.64	-0.24387	1.9775e-05	0.00058151	Smyd1	protein_coding	SET and MYND domain containing 1 [Source:MGI Symbol;Acc:MGI:104790]
ENSMUSG00000027805	583.937	715.499	-0.28076	1.9977e-05	0.00058606	Pfn2	protein_coding	profilin 2 [Source:MGI Symbol;Acc:MGI:97550]
ENSMUSG00000029685	793.611	1026.5	-0.3434	2.0208e-05	0.00059144	Asb15	protein_coding	ankyrin repeat and SOCS box-containing 15 [Source:MGI Symbol;Acc:MGI:1926160]
ENSMUSG00000057963	237.214	177.898	0.37934	2.0388e-05	0.00059529	Itpk1	protein_coding	inositol 1,3,4-triphosphate 5/6 kinase [Source:MGI Symbol;Acc:MGI:2446159]
ENSMUSG00000029096	2319.88	1894.52	0.27873	2.0546e-05	0.00059848	Htra3	protein_coding	HtrA serine peptidase 3 [Source:MGI Symbol;Acc:MGI:1925808]
ENSMUSG00000055980	133.18	80.7684	0.55071	2.0883e-05	0.00060689	Irs1	protein_coding	insulin receptor substrate 1 [Source:MGI Symbol;Acc:MGI:99454]
ENSMUSG00000013236	1010.8	1246.56	-0.28599	2.0962e-05	0.00060775	Ptprs	protein_coding	protein tyrosine phosphatase, receptor type, S [Source:MGI Symbol;Acc:MGI:97815]
ENSMUSG00000006717	3308.5	3853.41	-0.21357	2.1376e-05	0.00061593	Acot13	protein_coding	acyl-CoA thioesterase 13 [Source:MGI Symbol;Acc:MGI:1914084]
ENSMUSG00000008855	2702.06	2122.51	0.3248	2.1393e-05	0.00061593	Hdac5	protein_coding	histone deacetylase 5 [Source:MGI Symbol;Acc:MGI:1333784]
ENSMUSG00000038495	1230.78	1023.04	0.25664	2.1308e-05	0.00061593	Otud7b	protein_coding	OTU domain containing 7B [Source:MGI Symbol;Acc:MGI:2654703]
ENSMUSG00000028339	1111.26	943.613	0.22861	2.1817e-05	0.00062666	Col15a1	protein_coding	collagen, type XV, alpha 1 [Source:MGI Symbol;Acc:MGI:88449]
ENSMUSG00000040666	3236.74	4058.82	-0.30678	2.223e-05	0.00063704	Sh3bgr	protein_coding	SH3-binding domain glutamic acid-rich protein [Source:MGI Symbol;Acc:MGI:1354740]
ENSMUSG00000028494	1435.67	1038.01	0.41303	2.2784e-05	0.00065144	Plin2	protein_coding	perilipin 2 [Source:MGI Symbol;Acc:MGI:87920]
ENSMUSG00000020883	483.413	374.918	0.33697	2.316e-05	0.00066065	Fbxl20	protein_coding	F-box and leucine-rich repeat protein 20 [Source:MGI Symbol;Acc:MGI:1919444]
ENSMUSG00000023055	4206.79	3529.57	0.2438	2.3407e-05	0.00066615	Calcoco1	protein_coding	calcium binding and coiled coil domain 1 [Source:MGI Symbol;Acc:MGI:1914738]
ENSMUSG00000037465	304.342	191.065	0.52797	2.3722e-05	0.00067358	Klf10	protein_coding	Kruppel-like factor 10 [Source:MGI Symbol;Acc:MGI:1101353]
ENSMUSG00000023439	278.887	195.024	0.44461	2.5109e-05	0.00071133	Gnb3	protein_coding	guanine nucleotide binding protein (G protein), beta 3 [Source:MGI Symbol;Acc:MGI:95785]
ENSMUSG00000032334	1159.53	835.833	0.41575	2.5332e-05	0.000716	Loxl1	protein_coding	lysyl oxidase-like 1 [Source:MGI Symbol;Acc:MGI:106096]
ENSMUSG00000000552	419.391	328.279	0.32925	2.5935e-05	0.00073138	Zfp385a	protein_coding	zinc finger protein 385A [Source:MGI Symbol;Acc:MGI:1352495]
ENSMUSG00000021361	1198.7	1456.82	-0.2684	2.6068e-05	0.00073345	Tmem14c	protein_coding	transmembrane protein 14C [Source:MGI Symbol;Acc:MGI:1913404]
ENSMUSG00000026701	2773.96	3253.91	-0.2229	2.6365e-05	0.00073846	Prdx6	protein_coding	peroxiredoxin 6 [Source:MGI Symbol;Acc:MGI:894320]
ENSMUSG00000032034	1800.28	2258.46	-0.30671	2.6343e-05	0.00073846	Kcnj5	protein_coding	potassium inwardly-rectifying channel, subfamily J, member 5 [Source:MGI Symbol;Acc:MGI:104755]
ENSMUSG00000038239	16117.4	18774.5	-0.21389	2.654e-05	0.00074167	Hrc	protein_coding	histidine rich calcium binding protein [Source:MGI Symbol;Acc:MGI:96226]
ENSMUSG00000022698	1201.59	1435.57	-0.24597	2.6694e-05	0.00074431	Naa50	protein_coding	N(alpha)-acetyltransferase 50, NatE catalytic subunit [Source:MGI Symbol;Acc:MGI:1919367]
ENSMUSG00000028156	2237.75	2696.36	-0.25831	2.6884e-05	0.00074718	Eif4e	protein_coding	eukaryotic translation initiation factor 4E [Source:MGI Symbol;Acc:MGI:95305]
ENSMUSG00000031708	7518.62	9281.08	-0.28764	2.6918e-05	0.00074718	Tecr	protein_coding	trans-2,3-enoyl-CoA reductase [Source:MGI Symbol;Acc:MGI:1915408]
ENSMUSG00000034522	406.113	244.826	0.54954	2.7013e-05	0.00074814	Zfp395	protein_coding	zinc finger protein 395 [Source:MGI Symbol;Acc:MGI:2682318]
ENSMUSG00000096188	451.604	364.214	0.29076	2.7177e-05	0.00075101	Cmtm4	protein_coding	CKLF-like MARVEL transmembrane domain containing 4 [Source:MGI Symbol;Acc:MGI:2142888]
ENSMUSG00000042961	319.048	420.859	-0.36372	2.8103e-05	0.00077486	Egflam	protein_coding	EGF-like, fibronectin type III and laminin G domains [Source:MGI Symbol;Acc:MGI:2146149]
ENSMUSG00000062210	992.652	1200.66	-0.2641	2.8227e-05	0.00077656	Tnfaip8	protein_coding	tumor necrosis factor, alpha-induced protein 8 [Source:MGI Symbol;Acc:MGI:2147191]
ENSMUSG00000024991	3234.26	2754	0.22487	2.8679e-05	0.00078725	Eif3a	protein_coding	eukaryotic translation initiation factor 3, subunit A [Source:MGI Symbol;Acc:MGI:95301]
ENSMUSG00000040624	220.403	149.124	0.47085	2.8954e-05	0.00079304	Plekhg1	protein_coding	pleckstrin homology domain containing, family G (with RhoGef domain) member 1 [Source:MGI Symbol;Acc:MGI:2676551]
ENSMUSG00000026605	609.486	949.879	-0.51076	2.9489e-05	0.00080591	Cenpf	protein_coding	centromere protein F [Source:MGI Symbol;Acc:MGI:1313302]
ENSMUSG00000028796	800.014	639.701	0.30504	2.975e-05	0.00081125	Phc2	protein_coding	polyhomeotic-like 2 (Drosophila) [Source:MGI Symbol;Acc:MGI:1860454]
ENSMUSG00000058743	15.3091	36.9472	-0.63598	3.0494e-05	0.00082971	Kcnj14	protein_coding	potassium inwardly-rectifying channel, subfamily J, member 14 [Source:MGI Symbol;Acc:MGI:2384820]
ENSMUSG00000068614	165101	203640	-0.28638	3.1909e-05	0.00086631	Actc1	protein_coding	actin, alpha, cardiac muscle 1 [Source:MGI Symbol;Acc:MGI:87905]
ENSMUSG00000046480	760.462	1085.37	-0.44138	3.2119e-05	0.00087009	Scn4b	protein_coding	sodium channel, type IV, beta [Source:MGI Symbol;Acc:MGI:2687406]
ENSMUSG00000028348	1831.5	1494.77	0.27785	3.241e-05	0.00087605	Murc	protein_coding	muscle-related coiled-coil protein [Source:MGI Symbol;Acc:MGI:1915266]
ENSMUSG00000030605	2817.06	2359.24	0.24594	3.256e-05	0.0008782	Mfge8	protein_coding	milk fat globule-EGF factor 8 protein [Source:MGI Symbol;Acc:MGI:102768]
ENSMUSG00000018442	452.343	556.616	-0.2821	3.3922e-05	0.00091147	Derl2	protein_coding	Der1-like domain family, member 2 [Source:MGI Symbol;Acc:MGI:2151483]
ENSMUSG00000029190	1876.93	2217.32	-0.23221	3.3941e-05	0.00091147	D5Ertd579e	protein_coding	DNA segment, Chr 5, ERATO Doi 579, expressed [Source:MGI Symbol;Acc:MGI:1261849]
ENSMUSG00000026121	292.648	217.524	0.38225	3.4194e-05	0.00091628	Sema4c	protein_coding	sema domain, immunoglobulin domain (Ig), transmembrane domain (TM) and short cytoplasmic domain, (semaphorin) 4C [Source:MGI Symbol;Acc:MGI:109252]
ENSMUSG00000027712	1873.84	1530.58	0.2772	3.4666e-05	0.00092693	Anxa5	protein_coding	annexin A5 [Source:MGI Symbol;Acc:MGI:106008]
ENSMUSG00000033767	449.481	314.646	0.43937	3.5989e-05	0.00095815	D930015E06Rik	protein_coding	RIKEN cDNA D930015E06 gene [Source:MGI Symbol;Acc:MGI:2443399]
ENSMUSG00000047875	924.741	1261.25	-0.3975	3.5926e-05	0.00095815	Gpr157	protein_coding	G protein-coupled receptor 157 [Source:MGI Symbol;Acc:MGI:2442046]
ENSMUSG00000031358	778.603	929.67	-0.24565	3.6287e-05	0.00096401	Msl3	protein_coding	male-specific lethal 3 homolog (Drosophila) [Source:MGI Symbol;Acc:MGI:1341851]
ENSMUSG00000001138	394.329	282.521	0.41808	3.6568e-05	0.0009694	Cnnm3	protein_coding	cyclin M3 [Source:MGI Symbol;Acc:MGI:2151055]
ENSMUSG00000020674	1011.32	833.221	0.26472	3.7014e-05	0.00097912	Pxdn	protein_coding	peroxidasin homolog (Drosophila) [Source:MGI Symbol;Acc:MGI:1916925]
ENSMUSG00000004105	1158.28	1490.2	-0.33582	3.7251e-05	0.00098121	Angptl2	protein_coding	angiopoietin-like 2 [Source:MGI Symbol;Acc:MGI:1347002]
ENSMUSG00000024014	515.257	309.558	0.54709	3.7218e-05	0.00098121	Pim1	protein_coding	proviral integration site 1 [Source:MGI Symbol;Acc:MGI:97584]
ENSMUSG00000020777	7560.19	6317.73	0.24837	3.7652e-05	0.00098757	Acox1	protein_coding	acyl-Coenzyme A oxidase 1, palmitoyl [Source:MGI Symbol;Acc:MGI:1330812]
ENSMUSG00000033405	98.5812	142.849	-0.45547	3.7593e-05	0.00098757	Nudt15	protein_coding	nudix (nucleoside diphosphate linked moiety X)-type motif 15 [Source:MGI Symbol;Acc:MGI:2443366]
ENSMUSG00000040652	3436.98	3946.14	-0.19445	3.8144e-05	0.00099835	Oaz2	protein_coding	ornithine decarboxylase antizyme 2 [Source:MGI Symbol;Acc:MGI:109492]
ENSMUSG00000043831	283.375	373.645	-0.36294	4.0082e-05	0.0010469	Lysmd4	protein_coding	LysM, putative peptidoglycan-binding, domain containing 4 [Source:MGI Symbol;Acc:MGI:1922349]
ENSMUSG00000019787	3744.79	4465.85	-0.24386	4.0903e-05	0.0010661	Trdn	protein_coding	triadin [Source:MGI Symbol;Acc:MGI:1924007]
ENSMUSG00000051671	294.289	368.48	-0.30208	4.1763e-05	0.0010862	Coa6	protein_coding	cytochrome c oxidase assembly factor 6 [Source:MGI Symbol;Acc:MGI:1915142]
ENSMUSG00000045962	4597.19	5762.2	-0.30501	4.2206e-05	0.0010954	Wnk1	protein_coding	WNK lysine deficient protein kinase 1 [Source:MGI Symbol;Acc:MGI:2442092]
ENSMUSG00000017446	178.003	129.76	0.39913	4.2688e-05	0.0011056	C1qtnf1	protein_coding	C1q and tumor necrosis factor related protein 1 [Source:MGI Symbol;Acc:MGI:1919254]
ENSMUSG00000031808	6258.82	4510.58	0.41313	4.3835e-05	0.0011329	Slc27a1	protein_coding	solute carrier family 27 (fatty acid transporter), member 1 [Source:MGI Symbol;Acc:MGI:1347098]
ENSMUSG00000062604	605.574	760.978	-0.30767	4.4281e-05	0.0011397	Srpk2	protein_coding	serine/arginine-rich protein specific kinase 2 [Source:MGI Symbol;Acc:MGI:1201408]
ENSMUSG00000071324	739.681	947.12	-0.32934	4.422e-05	0.0011397	Armc2	protein_coding	armadillo repeat containing 2 [Source:MGI Symbol;Acc:MGI:1916449]
ENSMUSG00000040111	610.892	469.561	0.34681	4.4562e-05	0.0011446	Gramd1b	protein_coding	GRAM domain containing 1B [Source:MGI Symbol;Acc:MGI:1925037]
ENSMUSG00000042770	327.327	249.162	0.3555	4.5446e-05	0.0011624	Hebp1	protein_coding	heme binding protein 1 [Source:MGI Symbol;Acc:MGI:1333880]
ENSMUSG00000063659	505.614	633.246	-0.30352	4.54e-05	0.0011624	Zbtb18	protein_coding	zinc finger and BTB domain containing 18 [Source:MGI Symbol;Acc:MGI:1353609]
ENSMUSG00000005124	33.1497	61.3518	-0.58617	4.6147e-05	0.0011778	Wisp1	protein_coding	WNT1 inducible signaling pathway protein 1 [Source:MGI Symbol;Acc:MGI:1197008]
ENSMUSG00000030083	652.441	510.09	0.32674	4.6235e-05	0.0011778	Abtb1	protein_coding	ankyrin repeat and BTB (POZ) domain containing 1 [Source:MGI Symbol;Acc:MGI:1933148]
ENSMUSG00000063888	820.429	972.165	-0.23537	4.6444e-05	0.0011807	Rpl7l1	protein_coding	ribosomal protein L7-like 1 [Source:MGI Symbol;Acc:MGI:1913479]
ENSMUSG00000030862	545.112	847.377	-0.50333	4.7396e-05	0.0011999	Cpxm2	protein_coding	carboxypeptidase X 2 (M14 family) [Source:MGI Symbol;Acc:MGI:1926006]
ENSMUSG00000033377	906.451	755.602	0.25297	4.7391e-05	0.0011999	Palmd	protein_coding	palmdelphin [Source:MGI Symbol;Acc:MGI:2148896]
ENSMUSG00000000440	269.665	207.404	0.34511	4.7513e-05	0.0012004	Pparg	protein_coding	peroxisome proliferator activated receptor gamma [Source:MGI Symbol;Acc:MGI:97747]
ENSMUSG00000058297	768.165	539.651	0.43673	5.0346e-05	0.0012694	Spock2	protein_coding	sparc/osteonectin, cwcv and kazal-like domains proteoglycan 2 [Source:MGI Symbol;Acc:MGI:1891351]
ENSMUSG00000022507	787.224	950.001	-0.25893	5.1011e-05	0.0012836	1810013L24Rik	protein_coding	RIKEN cDNA 1810013L24 gene [Source:MGI Symbol;Acc:MGI:1916303]
ENSMUSG00000010080	261.106	352.726	-0.38715	5.19e-05	0.0013033	Epn3	protein_coding	epsin 3 [Source:MGI Symbol;Acc:MGI:1919139]
ENSMUSG00000050503	1276.9	1694.88	-0.36777	5.2235e-05	0.001309	Fbxl22	protein_coding	F-box and leucine-rich repeat protein 22 [Source:MGI Symbol;Acc:MGI:1921415]
ENSMUSG00000032224	108.068	152.988	-0.43337	5.3133e-05	0.0013289	Fam81a	protein_coding	family with sequence similarity 81, member A [Source:MGI Symbol;Acc:MGI:1924136]
ENSMUSG00000053411	759.223	588.809	0.33694	5.3681e-05	0.0013399	Cbx7	protein_coding	chromobox 7 [Source:MGI Symbol;Acc:MGI:1196439]
ENSMUSG00000033419	136.573	190.16	-0.41471	5.4575e-05	0.0013594	Snap91	protein_coding	synaptosomal-associated protein 91 [Source:MGI Symbol;Acc:MGI:109132]
ENSMUSG00000028878	733.958	887.585	-0.2609	5.4875e-05	0.0013642	Fam76a	protein_coding	family with sequence similarity 76, member A [Source:MGI Symbol;Acc:MGI:2385211]
ENSMUSG00000033032	1197.36	1410.07	-0.2277	5.532e-05	0.0013725	Afap1l1	protein_coding	actin filament associated protein 1-like 1 [Source:MGI Symbol;Acc:MGI:2147199]
ENSMUSG00000038583	89733.1	104611	-0.21439	5.5644e-05	0.0013777	Pln	protein_coding	phospholamban [Source:MGI Symbol;Acc:MGI:97622]
ENSMUSG00000029394	873.038	1055.27	-0.26031	5.6935e-05	0.0014041	Cdk2ap1	protein_coding	CDK2 (cyclin-dependent kinase 2)-associated protein 1 [Source:MGI Symbol;Acc:MGI:1202069]
ENSMUSG00000060519	318.312	231.094	0.40402	5.6898e-05	0.0014041	Tor3a	protein_coding	torsin family 3, member A [Source:MGI Symbol;Acc:MGI:1353652]
ENSMUSG00000078670	4863.33	5927.41	-0.27091	5.7565e-05	0.0014168	Fam174b	protein_coding	family with sequence similarity 174, member B [Source:MGI Symbol;Acc:MGI:3698178]
ENSMUSG00000047298	198.994	125.418	0.51351	5.7887e-05	0.0014219	Kcnv2	protein_coding	potassium channel, subfamily V, member 2 [Source:MGI Symbol;Acc:MGI:2670981]
ENSMUSG00000029311	1368.27	911.143	0.47681	5.8614e-05	0.0014369	Hsd17b11	protein_coding	hydroxysteroid (17-beta) dehydrogenase 11 [Source:MGI Symbol;Acc:MGI:2149821]
ENSMUSG00000039633	228.025	350.85	-0.49395	5.8911e-05	0.0014413	Lonrf1	protein_coding	LON peptidase N-terminal domain and ring finger 1 [Source:MGI Symbol;Acc:MGI:3609241]
ENSMUSG00000032705	278.644	208.686	0.37412	5.9263e-05	0.0014471	Exd2	protein_coding	exonuclease 3'-5' domain containing 2 [Source:MGI Symbol;Acc:MGI:1922485]
ENSMUSG00000029238	461.762	331.465	0.41516	5.9409e-05	0.0014478	Clock	protein_coding	circadian locomotor output cycles kaput [Source:MGI Symbol;Acc:MGI:99698]
ENSMUSG00000028488	26.2248	55.5493	-0.60663	6.0212e-05	0.0014645	Sh3gl2	protein_coding	SH3-domain GRB2-like 2 [Source:MGI Symbol;Acc:MGI:700009]
ENSMUSG00000024471	1376.75	970.764	0.4308	6.3767e-05	0.0015479	Myot	protein_coding	myotilin [Source:MGI Symbol;Acc:MGI:1889800]
ENSMUSG00000027800	1882.39	1441.74	0.3493	6.5237e-05	0.0015743	Tm4sf1	protein_coding	transmembrane 4 superfamily member 1 [Source:MGI Symbol;Acc:MGI:104678]
ENSMUSG00000032449	855.043	681.551	0.30565	6.5146e-05	0.0015743	Slc25a36	protein_coding	solute carrier family 25, member 36 [Source:MGI Symbol;Acc:MGI:1924909]
ENSMUSG00000047153	234.597	169.705	0.40556	6.5093e-05	0.0015743	Khnyn	protein_coding	KH and NYN domain containing [Source:MGI Symbol;Acc:MGI:2451333]
ENSMUSG00000003559	841.225	987.472	-0.22252	6.5518e-05	0.001578	As3mt	protein_coding	arsenic (+3 oxidation state) methyltransferase [Source:MGI Symbol;Acc:MGI:1929882]
ENSMUSG00000045414	664.481	814.869	-0.27827	6.6523e-05	0.0015991	1190002N15Rik	protein_coding	RIKEN cDNA 1190002N15 gene [Source:MGI Symbol;Acc:MGI:1916111]
ENSMUSG00000001349	225.137	142.534	0.50983	6.8348e-05	0.0016398	Cnn1	protein_coding	calponin 1 [Source:MGI Symbol;Acc:MGI:104979]
ENSMUSG00000004897	1989.02	2327.07	-0.2187	6.8603e-05	0.0016426	Hdgf	protein_coding	hepatoma-derived growth factor [Source:MGI Symbol;Acc:MGI:1194494]
ENSMUSG00000041084	550.985	655.316	-0.24108	6.8727e-05	0.0016426	Ostc	protein_coding	oligosaccharyltransferase complex subunit [Source:MGI Symbol;Acc:MGI:1913607]
ENSMUSG00000031568	512.361	643.151	-0.30626	7.02e-05	0.0016713	Rwdd4a	protein_coding	RWD domain containing 4A [Source:MGI Symbol;Acc:MGI:2681000]
ENSMUSG00000052852	344.265	431.552	-0.30364	7.009e-05	0.0016713	Reep1	protein_coding	receptor accessory protein 1 [Source:MGI Symbol;Acc:MGI:1098827]
ENSMUSG00000039096	216.304	286.314	-0.36748	7.0832e-05	0.0016831	Rsad1	protein_coding	radical S-adenosyl methionine domain containing 1 [Source:MGI Symbol;Acc:MGI:3039628]
ENSMUSG00000026154	610.976	740.847	-0.26469	7.1211e-05	0.0016889	1110058L19Rik	protein_coding	RIKEN cDNA 1110058L19 gene [Source:MGI Symbol;Acc:MGI:1915252]
[truncated: 1,059 more rows]

## Sheet: DEGs from EOD vs AL
Gene ID	readcount_IF12_HE	readcount_AL_HE	log2FoldChange	pval	padj	Associated Gene Name	genetype	Description
[truncated: 2,064 more rows]

## Sheet: All Common DEGs
Ensemble ID	Gene Name	IF12 vs AL FC	IF16 vs AL FC	EOD vs AL FC	AL readcount	IF12 readcount	IF16 readcount	EOD readcount
[truncated: 500 more rows]

[truncated: 3 more sheets: Go enrichment from IF16 vs AL, Go enrichment from EOD vs AL, Go enrichment of all common DEG]
