# Supplementary material for: Multiomics Analyses Reveal Dynamic Bioenergetic Pathways and Functional Remodeling of the Heart During Intermittent Fasting
Source: bioRxiv preprint, doi:10.1101/2021.03.04.433999, version 2 (2023-05-07)
Supplement: Supplementary Table 7 [file 433999_file26.xlsx]

## Sheet: a. Positively Correlated
Table S7: Perturbation of protein association co-regulation in different dietary groups
a. Positively correlated protein pairs from quantified proteome
Protein A	Protein B	Correlation Coefficient	p value	BH-adjusted p value
Q03265_ATP5A1	P56480_ATP5B	0.944215	3.95582e-09	0.0001012
P62737_ACTA2	Q9JI91_ACTN2	0.876939	1.78519e-06	0.00284597
P51667_MYL2	P04247_MB	0.876613	1.82143e-06	0.0028702
P62737_ACTA2	Q14BI5_MYOM2	0.846591	9.4208e-06	0.0060349
Q9JI91_ACTN2	Q14BI5_MYOM2	0.831438	1.90304e-05	0.00841798
P62737_ACTA2	Q3UIK0_MYBPC3	0.886939	9.36357e-07	0.00208718
Q03265_ATP5A1	Q6P8J7_CKMT2	0.84254	1.14497e-05	0.00660456
Q03265_ATP5A1	Q8BMS1_HADHA	0.896694	4.69588e-07	0.00149124
Q99JY0_HADHB	Q8BMS1_HADHA	0.884874	1.07498e-06	0.00222584
Q3UIK0_MYBPC3	P07310_CKM	0.887397	9.07764e-07	0.00204757
Q3UIK0_MYBPC3	Q62234_MYOM1	0.888545	8.39466e-07	0.00195059
P07310_CKM	Q62234_MYOM1	0.823348	2.69506e-05	0.00974759
Q99JY0_HADHB	P50544_ACADVL	0.889004	8.1343e-07	0.00195059
Q9QXS1_PLEC	P50544_ACADVL	0.82739	2.26994e-05	0.0090694
Q8BMS1_HADHA	P50544_ACADVL	0.857438	5.43132e-06	0.00469621
Q8BWT1_ACAA2	P50544_ACADVL	0.887971	8.73029e-07	0.00198238
P51667_MYL2	P09542_MYL3	0.890036	7.57373e-07	0.00186192
F8WID5_TPM1	P09542_MYL3	0.822922	2.74351e-05	0.00981518
P62737_ACTA2	P17182_ENO1	0.834711	1.64464e-05	0.00781365
Q3UIK0_MYBPC3	P17182_ENO1	0.843573	1.09e-05	0.00652285
A3KGU9_SPTAN1	Q62261_SPTBN1	0.824561	2.56082e-05	0.0094547
Q91Z83_MYH7	Q62261_SPTBN1	0.824561	2.56082e-05	0.0094547
Q9QXS1_PLEC	Q9WUB3_PYGM	0.882687	1.24067e-06	0.00237858
Q9QXS1_PLEC	Q60932_VDAC1	0.890383	7.39331e-07	0.00184646
E9Q616_AHNAK	E9PWQ3_COL6A3	0.828689	2.14612e-05	0.00876563
Q8BMS1_HADHA	P97807_FH	0.886939	9.36357e-07	0.00208718
Q99JY0_HADHB	E9Q800_IMMT	0.893134	6.08717e-07	0.00171429
Q9QXS1_PLEC	E9Q800_IMMT	0.871835	2.43012e-06	0.00325178
Q8BMS1_HADHA	E9Q800_IMMT	0.852273	7.09812e-06	0.00535587
Q8BWT1_ACAA2	E9Q800_IMMT	0.867321	3.15826e-06	0.0036745
P50544_ACADVL	E9Q800_IMMT	0.964876	1.04319e-10	1.03351e-05
Q9WUB3_PYGM	P52480_PKM	0.862158	4.21396e-06	0.00423258
Q03265_ATP5A1	Q8K2B3_SDHA	0.866736	3.26514e-06	0.00376924
P56480_ATP5B	Q8K2B3_SDHA	0.905992	2.27582e-07	0.00104885
Q8BMS1_HADHA	Q8K2B3_SDHA	0.872934	2.27651e-06	0.00318144
P62737_ACTA2	P19123_TNNC1	0.95302	1.02927e-09	4.80764e-05
Q9JI91_ACTN2	P19123_TNNC1	0.847546	8.99002e-06	0.0059435
Q14BI5_MYOM2	P19123_TNNC1	0.861126	4.458e-06	0.00429063
Q3UIK0_MYBPC3	P19123_TNNC1	0.832817	1.79019e-05	0.00810038
P17182_ENO1	P19123_TNNC1	0.839443	1.32436e-05	0.00713867
Q60597_OGDH	Q9D0K2_OXCT1	0.8508	7.64686e-06	0.0054956
Q99KI0_ACO2	Q99LC5_ETFA	0.954029	8.67979e-10	4.1798e-05
P97807_FH	Q9DCX2_ATP5H	0.835312	1.60056e-05	0.00778112
P11404_FABP3	P38647_HSPA9	0.852865	6.88698e-06	0.00522979
Q8BWT1_ACAA2	O35459_ECH1	0.824381	2.58045e-05	0.00948837
P50544_ACADVL	O35459_ECH1	0.896124	4.89815e-07	0.00152161
E9Q800_IMMT	O35459_ECH1	0.838243	1.40001e-05	0.00726451
O55143_ATP2A2	E9Q401_RYR2	0.832215	1.83875e-05	0.00819496
P08249_MDH2	P05202_GOT2	0.856405	5.73468e-06	0.00485964
Q8K2B3_SDHA	P05202_GOT2	0.867769	3.0785e-06	0.00363169
Q8BMS1_HADHA	Q8QZT1_ACAT1	0.845638	9.86813e-06	0.00621674
P50544_ACADVL	Q8QZT1_ACAT1	0.907589	1.99451e-07	0.000982055
E9Q800_IMMT	Q8QZT1_ACAT1	0.915849	9.68482e-08	0.000673402
Q921G7_ETFDH	Q8QZT1_ACAT1	0.889463	7.88054e-07	0.00191711
P56480_ATP5B	Q9CQ62_DECR1	0.826873	2.32086e-05	0.00910461
Q99JY0_HADHB	Q9CQ62_DECR1	0.934918	1.31796e-08	0.000219264
Q8BMS1_HADHA	Q9CQ62_DECR1	0.898191	4.19864e-07	0.0014154
P50544_ACADVL	Q9CQ62_DECR1	0.829457	2.07566e-05	0.00871775
P97807_FH	Q9CQ62_DECR1	0.893596	5.88877e-07	0.00168256
E9Q800_IMMT	Q9CQ62_DECR1	0.843928	1.07163e-05	0.00648095
Q8K2B3_SDHA	Q9CQ62_DECR1	0.828941	2.12284e-05	0.00876563
P38647_HSPA9	O08749_DLD	0.831095	1.93202e-05	0.00842172
Q8BMS1_HADHA	P45952_ACADM	0.894358	5.57323e-07	0.00162628
P97807_FH	P45952_ACADM	0.898555	4.08495e-07	0.00139922
Q99LC5_ETFA	P45952_ACADM	0.859661	4.8249e-06	0.00445541
Q9DCX2_ATP5H	P45952_ACADM	0.839464	1.32302e-05	0.00713867
Q921G7_ETFDH	P45952_ACADM	0.861142	4.45408e-06	0.00429063
Q8QZT1_ACAT1	P45952_ACADM	0.841619	1.196e-05	0.00682881
Q60932_VDAC1	Q91WD5_NDUFS2	0.838243	1.40001e-05	0.00726451
Q62261_SPTBN1	E9PZ16_HSPG2	0.824807	2.53435e-05	0.0094547
Q8BMS1_HADHA	Q9CZ13_UQCRC1	0.839876	1.29789e-05	0.00706556
P50544_ACADVL	Q9CZ13_UQCRC1	0.872417	2.34762e-06	0.00323667
P97807_FH	Q9CZ13_UQCRC1	0.847703	8.92108e-06	0.0059435
E9Q800_IMMT	Q9CZ13_UQCRC1	0.854855	6.21694e-06	0.00500258
Q8K2B3_SDHA	Q9CZ13_UQCRC1	0.860537	4.60241e-06	0.00439454
Q921G7_ETFDH	Q9CZ13_UQCRC1	0.871318	2.50537e-06	0.00329744
Q8QZT1_ACAT1	Q9CZ13_UQCRC1	0.959215	3.38638e-10	2.30011e-05
P45952_ACADM	Q9CZ13_UQCRC1	0.866911	3.23272e-06	0.00375159
Q3UIK0_MYBPC3	B7ZCI2_NEBL	0.886481	9.65677e-07	0.00209168
P07310_CKM	B7ZCI2_NEBL	0.832645	1.80396e-05	0.00812975
Q62234_MYOM1	B7ZCI2_NEBL	0.925697	3.69363e-08	0.000385323
E9QQ96_OBSCN	P04117_FABP4	0.868598	2.93534e-06	0.00359278
A3KGU9_SPTAN1	P04117_FABP4	0.865703	3.46133e-06	0.00383583
Q60675_LAMA2	P04117_FABP4	0.838593	1.37756e-05	0.00722125
Q9QXS1_PLEC	Q8CI94_PYGB	0.945737	3.18604e-09	8.88109e-05
Q9WUB3_PYGM	Q8CI94_PYGB	0.953512	9.47584e-10	4.50733e-05
Q60932_VDAC1	Q8CI94_PYGB	0.879587	1.51319e-06	0.00259385
E9Q800_IMMT	Q8CI94_PYGB	0.823347	2.69511e-05	0.00974759
Q14BI5_MYOM2	P14152_MDH1	0.865186	3.5633e-06	0.00389053
P07310_CKM	P14152_MDH1	0.890956	7.1027e-07	0.00182928
Q99JY0_HADHB	O09161_CASQ2	0.887856	8.79885e-07	0.00199429
Q9QXS1_PLEC	O09161_CASQ2	0.900155	3.61575e-07	0.00131556
P50544_ACADVL	O09161_CASQ2	0.87332	2.22457e-06	0.00312748
E9Q800_IMMT	O09161_CASQ2	0.921924	5.4233e-08	0.000485694
Q99JY0_HADHB	Q8CC88_VWA8	0.834881	1.63204e-05	0.00778112
Q8K2B3_SDHA	Q8CC88_VWA8	0.82189	2.86419e-05	0.00992501
Q921G7_ETFDH	A2AKU9_ATP5C1	0.867184	3.18303e-06	0.00369585
Q8QZT1_ACAT1	A2AKU9_ATP5C1	0.895199	5.24248e-07	0.00159669
P45952_ACADM	A2AKU9_ATP5C1	0.880894	1.39262e-06	0.00253446
Q9CZ13_UQCRC1	A2AKU9_ATP5C1	0.916322	9.27196e-08	0.000653459
Q99JY0_HADHB	Q7TQ48_SRL	0.832817	1.79019e-05	0.00810038
Q9D051_PDHB	Q8BMF4_DLAT	0.894628	5.46515e-07	0.00160117
Q921G7_ETFDH	P16125_LDHB	0.845042	1.01569e-05	0.00624874
Q8QZT1_ACAT1	Q9Z2I9_SUCLA2	0.836777	1.49744e-05	0.00747811
Q9CZ13_UQCRC1	Q9Z2I9_SUCLA2	0.864083	3.78957e-06	0.00403015
Q8CC88_VWA8	Q9Z2I9_SUCLA2	0.825414	2.47002e-05	0.00938355
O55143_ATP2A2	Q8VDN2_ATP1A1	0.847624	8.95573e-06	0.0059435
Q99JY0_HADHB	Q6PB66_LRPPRC	0.864223	3.76011e-06	0.00403015
Q8BWT1_ACAA2	Q6PB66_LRPPRC	0.861126	4.458e-06	0.00429063
P50544_ACADVL	Q6PB66_LRPPRC	0.907025	2.09025e-07	0.000986416
Q60597_OGDH	Q6PB66_LRPPRC	0.865256	3.5494e-06	0.00387726
E9Q800_IMMT	Q6PB66_LRPPRC	0.884298	1.11668e-06	0.00223713
O35459_ECH1	Q6PB66_LRPPRC	0.865116	3.57722e-06	0.00390025
Q8QZT1_ACAT1	Q6PB66_LRPPRC	0.868353	2.977e-06	0.00361447
Q8CC88_VWA8	Q6PB66_LRPPRC	0.845638	9.86813e-06	0.00621674
Q60675_LAMA2	E9QN70_LAMB1	0.9292	2.53819e-08	0.000310375
P04117_FABP4	E9QN70_LAMB1	0.826447	2.36365e-05	0.00913928
P11404_FABP3	Q9R0Y5-2_AK1	0.855372	6.05232e-06	0.00493275
O08749_DLD	Q9R0Y5-2_AK1	0.82584	2.42565e-05	0.00926345
P45952_ACADM	Q8BH95_ECHS1	0.852929	6.8647e-06	0.00522979
P62737_ACTA2	O70250_PGAM2	0.896231	4.85953e-07	0.00151445
Q6P8J7_CKMT2	Q9EQ20_ALDH6A1	0.931682	1.92318e-08	0.000269735
Q8CC88_VWA8	Q9EQ20_ALDH6A1	0.858182	5.22143e-06	0.00468009
Q60675_LAMA2	F8VQJ3_LAMC1	0.938502	8.47315e-09	0.000172301
E9QN70_LAMB1	F8VQJ3_LAMC1	0.93808	8.93749e-09	0.000172476
Q62234_MYOM1	J3QQ13_TNNT2	0.855521	6.00563e-06	0.00491959
B7ZCI2_NEBL	J3QQ13_TNNT2	0.832817	1.79019e-05	0.00810038
E9Q035_GM20425	Q61838_PZP	0.84254	1.14497e-05	0.00660456
P08249_MDH2	Q9CQA3_SDHB	0.824987	2.51511e-05	0.0094547
Q8K2B3_SDHA	Q9CQA3_SDHB	0.84667	9.38437e-06	0.00601553
Q921G7_ETFDH	Q9CQA3_SDHB	0.895662	5.06775e-07	0.00156466
P05202_GOT2	Q9CQA3_SDHB	0.886939	9.36357e-07	0.00208718
Q9D051_PDHB	P35486_PDHA1	0.909607	1.68247e-07	0.000897378
Q8BMF4_DLAT	P35486_PDHA1	0.899793	3.71758e-07	0.00134725
Q99LC5_ETFA	Q9DCW4_ETFB	0.841426	1.20695e-05	0.00682881
P45952_ACADM	Q9DCW4_ETFB	0.846714	9.36414e-06	0.00601553
Q8BH95_ECHS1	Q9DCW4_ETFB	0.833161	1.76297e-05	0.00810038
Q9QXS1_PLEC	Q9CQQ7_ATP5F1	0.828941	2.12284e-05	0.00876563
Q9DCX2_ATP5H	Q9CQQ7_ATP5F1	0.83781	1.42822e-05	0.00737789
Q921G7_ETFDH	Q61425_HADH	0.829546	2.06768e-05	0.00868838
P14152_MDH1	Q61425_HADH	0.8508	7.64686e-06	0.0054956
Q9CQA3_SDHB	Q61425_HADH	0.915377	1.01133e-07	0.000676287
P62737_ACTA2	P09411_PGK1	0.828424	2.17094e-05	0.008826
Q3UIK0_MYBPC3	P09411_PGK1	0.829546	2.06768e-05	0.00868838
Q99JY0_HADHB	P52825_CPT2	0.823348	2.69506e-05	0.00974759
Q9QXS1_PLEC	P52825_CPT2	0.88728	9.14983e-07	0.0020611
P50544_ACADVL	P52825_CPT2	0.903876	2.70077e-07	0.00114309
Q60932_VDAC1	P52825_CPT2	0.892451	6.39121e-07	0.00172798
E9Q800_IMMT	P52825_CPT2	0.897675	4.36488e-07	0.00146257
Q8QZT1_ACAT1	P52825_CPT2	0.912191	1.34536e-07	0.000798738
Q9CZ13_UQCRC1	P52825_CPT2	0.855814	5.91464e-06	0.00491959
Q8CI94_PYGB	P52825_CPT2	0.831008	1.93944e-05	0.00842172
O09161_CASQ2	P52825_CPT2	0.858769	5.0609e-06	0.00457719
Q9Z2I9_SUCLA2	P52825_CPT2	0.829886	2.03719e-05	0.00859893
Q6PB66_LRPPRC	P52825_CPT2	0.850129	7.90876e-06	0.00563693
A8DUK4_HBB-BS	P08032_SPTA1	0.985552	9.12603e-14	7.09743e-08
E9Q035_GM20425	P01027_C3	0.861126	4.458e-06	0.00429063
Q9WUB3_PYGM	E9QLJ0_CMYA5	0.822314	2.81405e-05	0.00984889
P52480_PKM	E9QLJ0_CMYA5	0.849768	8.05302e-06	0.0056813
Q60597_OGDH	P58281-2_OPA1	0.828689	2.14612e-05	0.00876563
Q921G7_ETFDH	Q9DB77_UQCRC2	0.829546	2.06768e-05	0.00868838
Q9CQA3_SDHB	Q9DB77_UQCRC2	0.907121	2.0737e-07	0.000985784
Q61425_HADH	Q9DB77_UQCRC2	0.950464	1.55976e-09	5.88859e-05
Q60597_OGDH	Q8BFR5_TUFM	0.88843	8.46084e-07	0.00195523
Q8CC88_VWA8	Q8BFR5_TUFM	0.865703	3.46133e-06	0.00383583
Q8VDD5_MYH9	P26039_TLN1	0.950464	1.55976e-09	5.88859e-05
Q8BTM8_FLNA	P26039_TLN1	0.864223	3.76011e-06	0.00403015
Q8BH95_ECHS1	P42125_ECI1	0.848423	8.60957e-06	0.00583331
A8DUK4_HBB-BS	Q91VB8_HBA-A1	0.93808	8.93749e-09	0.000172476
P08032_SPTA1	Q91VB8_HBA-A1	0.902993	2.89752e-07	0.00117336
A8DUK4_HBB-BS	Q3UGX2_SPTB	0.96904	3.85141e-11	5.49594e-06
P08032_SPTA1	Q3UGX2_SPTB	0.960784	2.48657e-10	1.79689e-05
Q91VB8_HBA-A1	Q3UGX2_SPTB	0.882353	1.26787e-06	0.00237858
Q9QXS1_PLEC	Q91ZA3_PCCA	0.861571	4.35134e-06	0.00424481
P50544_ACADVL	Q91ZA3_PCCA	0.873516	2.19861e-06	0.00309791
Q9WUB3_PYGM	Q91ZA3_PCCA	0.829117	2.10662e-05	0.00876563
E9Q800_IMMT	Q91ZA3_PCCA	0.894166	5.65121e-07	0.00162628
Q8QZT1_ACAT1	Q91ZA3_PCCA	0.905057	2.45589e-07	0.00107817
Q9CZ13_UQCRC1	Q91ZA3_PCCA	0.867321	3.15826e-06	0.0036745
Q8CI94_PYGB	Q91ZA3_PCCA	0.828085	2.20301e-05	0.0088575
O09161_CASQ2	Q91ZA3_PCCA	0.850647	7.70603e-06	0.00552739
Q9Z2I9_SUCLA2	Q91ZA3_PCCA	0.831612	1.88847e-05	0.00835923
Q6PB66_LRPPRC	Q91ZA3_PCCA	0.823955	2.62719e-05	0.00956106
P52825_CPT2	Q91ZA3_PCCA	0.893596	5.88877e-07	0.00168256
Q99KI0_ACO2	A0A1L1STE6_IDH3A	0.868802	2.90111e-06	0.00355256
P08249_MDH2	A0A1L1STE6_IDH3A	0.842459	1.14941e-05	0.00662695
F8WID5_TPM1	P48787_TNNI3	0.861713	4.31768e-06	0.00423258
Q9QXS1_PLEC	Q99NB1_ACSS1	0.859432	4.88467e-06	0.00448614
E9Q800_IMMT	Q99NB1_ACSS1	0.854339	6.38523e-06	0.00510551
Q8CI94_PYGB	Q99NB1_ACSS1	0.824897	2.52477e-05	0.0094547
P70670_NACA	Q99NB1_ACSS1	0.82189	2.86419e-05	0.00992501
Q9CQQ7_ATP5F1	Q99NB1_ACSS1	0.86157	4.35145e-06	0.00424481
Q9QXS1_PLEC	F8VPN4_AGL	0.877519	1.72225e-06	0.00276196
Q9WUB3_PYGM	F8VPN4_AGL	0.841942	1.17788e-05	0.00674833
Q8CI94_PYGB	F8VPN4_AGL	0.878099	1.66126e-06	0.00270629
P70670_NACA	F8VPN4_AGL	0.856995	5.55954e-06	0.00474786
E9Q035_GM20425	A0A0R4J0X5_SERPINA1C	0.956118	6.02298e-10	3.35781e-05
Q61838_PZP	A0A0R4J0X5_SERPINA1C	0.841073	1.22714e-05	0.00682881
P28665_MUG1	A0A0R4J0X5_SERPINA1C	0.834881	1.63204e-05	0.00778112
P01027_C3	A0A0R4J0X5_SERPINA1C	0.841073	1.22714e-05	0.00682881
J3QQ13_TNNT2	P05201_GOT1	0.828085	2.20301e-05	0.0088575
Q9QXS1_PLEC	P47857-3_PFKM	0.892395	6.41649e-07	0.00173451
Q9WUB3_PYGM	P47857-3_PFKM	0.976216	4.77951e-12	1.3767e-06
P52480_PKM	P47857-3_PFKM	0.87442	2.08219e-06	0.003049
Q8CI94_PYGB	P47857-3_PFKM	0.954499	8.00663e-10	3.96615e-05
Q91ZA3_PCCA	P47857-3_PFKM	0.851681	7.31459e-06	0.00542195
F8VPN4_AGL	P47857-3_PFKM	0.841262	1.21629e-05	0.00682881
Q99JY0_HADHB	Q9CR68_UQCRFS1	0.83428	1.67683e-05	0.00786974
E9Q800_IMMT	Q9CR68_UQCRFS1	0.84814	8.73067e-06	0.00588562
Q8QZT1_ACAT1	Q9CR68_UQCRFS1	0.875581	1.94043e-06	0.00291782
Q9CZ13_UQCRC1	Q9CR68_UQCRFS1	0.839876	1.29789e-05	0.00706556
O09161_CASQ2	Q9CR68_UQCRFS1	0.856774	5.62468e-06	0.0047937
P52825_CPT2	Q9CR68_UQCRFS1	0.902842	2.93219e-07	0.0011782
Q91ZA3_PCCA	Q9CR68_UQCRFS1	0.85493	6.1928e-06	0.00498677
Q62234_MYOM1	Q91VA7_IDH3B	0.824381	2.58045e-05	0.00948837
P58281-2_OPA1	Q91VA7_IDH3B	0.867769	3.07842e-06	0.00363169
Q9QXS1_PLEC	Q2TPA8_HSDL2	0.836176	1.53907e-05	0.00758767
P50544_ACADVL	Q2TPA8_HSDL2	0.835744	1.56958e-05	0.00770268
E9Q800_IMMT	Q2TPA8_HSDL2	0.879132	1.55717e-06	0.00265083
Q9D0K2_OXCT1	Q2TPA8_HSDL2	0.834711	1.64464e-05	0.00781365
Q99NB1_ACSS1	Q2TPA8_HSDL2	0.879132	1.55717e-06	0.00265083
P52480_PKM	Q8CGC7_EPRS	0.867321	3.15826e-06	0.0036745
P14824_ANXA6	Q8CGC7_EPRS	0.853306	6.73359e-06	0.00518059
A0A1L1SQ51_TLN2	P48678_LMNA	0.824561	2.56082e-05	0.0094547
Q9QXS1_PLEC	Q99MR8_MCCC1	0.85124	7.47927e-06	0.00544089
Q9WUB3_PYGM	Q99MR8_MCCC1	0.861126	4.458e-06	0.00429063
E9Q800_IMMT	Q99MR8_MCCC1	0.877646	1.70878e-06	0.00274659
Q8QZT1_ACAT1	Q99MR8_MCCC1	0.861713	4.31768e-06	0.00423258
Q8CI94_PYGB	Q99MR8_MCCC1	0.833247	1.7562e-05	0.00810038
P52825_CPT2	Q99MR8_MCCC1	0.865703	3.46133e-06	0.00383583
Q91ZA3_PCCA	Q99MR8_MCCC1	0.95872	3.72371e-10	2.42341e-05
P47857-3_PFKM	Q99MR8_MCCC1	0.879588	1.5131e-06	0.00259385
Q9CR68_UQCRFS1	Q99MR8_MCCC1	0.832215	1.83875e-05	0.00819496
P50544_ACADVL	Q07417_ACADS	0.835312	1.60056e-05	0.00778112
Q60597_OGDH	Q07417_ACADS	0.830753	1.96126e-05	0.00842172
Q8QZT1_ACAT1	Q07417_ACADS	0.841073	1.22714e-05	0.00682881
Q8CC88_VWA8	Q07417_ACADS	0.826625	2.34566e-05	0.00910461
Q9Z2I9_SUCLA2	Q07417_ACADS	0.866736	3.26505e-06	0.00376924
Q6PB66_LRPPRC	Q07417_ACADS	0.878678	1.60217e-06	0.00269704
Q61425_HADH	Q07417_ACADS	0.845201	1.0079e-05	0.00622501
P52825_CPT2	Q07417_ACADS	0.869835	2.73251e-06	0.00342437
P58281-2_OPA1	Q07417_ACADS	0.923633	4.56846e-08	0.000432495
Q91ZA3_PCCA	Q07417_ACADS	0.886481	9.65677e-07	0.00209168
Q9CR68_UQCRFS1	Q07417_ACADS	0.836345	1.52727e-05	0.00754118
Q91VA7_IDH3B	Q07417_ACADS	0.826447	2.36365e-05	0.00913928
Q99MR8_MCCC1	Q07417_ACADS	0.884417	1.10792e-06	0.00223022
Q99JY0_HADHB	F8WIA1_CLIP1	0.834881	1.63204e-05	0.00778112
Q8VDD5_MYH9	P60710_ACTB	0.872033	2.40176e-06	0.00323667
Q8BTM8_FLNA	P60710_ACTB	0.8508	7.64686e-06	0.0054956
P26039_TLN1	P60710_ACTB	0.857585	5.38926e-06	0.00468144
Q61941_NNT	G5E902_SLC25A3	0.920455	6.26574e-08	0.00052428
Q8QZT1_ACAT1	E9Q7L0_OGDHL	0.84254	1.14497e-05	0.00660456
Q9CZ13_UQCRC1	E9Q7L0_OGDHL	0.864669	3.66776e-06	0.003975
Q9Z2I9_SUCLA2	E9Q7L0_OGDHL	0.93385	1.49607e-08	0.000232006
P52825_CPT2	E9Q7L0_OGDHL	0.864083	3.78957e-06	0.00403015
Q91ZA3_PCCA	E9Q7L0_OGDHL	0.859061	4.98269e-06	0.00451538
Q07417_ACADS	E9Q7L0_OGDHL	0.855963	5.86885e-06	0.00491708
Q99LC5_ETFA	Q9DB20_ATP5O	0.834711	1.64464e-05	0.00781365
P58281-2_OPA1	O08528_HK2	0.882809	1.23095e-06	0.00237815
F8VPN4_AGL	O08528_HK2	0.852273	7.09812e-06	0.00535587
Q91VA7_IDH3B	O08528_HK2	0.85478	6.2411e-06	0.00501735
Q07417_ACADS	O08528_HK2	0.833247	1.7562e-05	0.00810038
Q9CPP6_NDUFA5	Q8K3J1_NDUFS8	0.838843	1.36172e-05	0.00716672
Q91WD5_NDUFS2	Q9DC69_NDUFA9	0.85877	5.06065e-06	0.00457719
Q8CC88_VWA8	P34914_EPHX2	0.83015	2.01385e-05	0.00851357
P50544_ACADVL	Q9D2G2_DLST	0.860021	4.73249e-06	0.00445541
E9Q800_IMMT	Q9D2G2_DLST	0.827996	2.21148e-05	0.0088849
Q8K2B3_SDHA	Q9D2G2_DLST	0.834711	1.64464e-05	0.00781365
Q921G7_ETFDH	Q9D2G2_DLST	0.893023	6.13548e-07	0.00171429
Q8QZT1_ACAT1	Q9D2G2_DLST	0.929272	2.51816e-08	0.000308168
Q9CZ13_UQCRC1	Q9D2G2_DLST	0.92407	4.3693e-08	0.000432323
Q8CC88_VWA8	Q9D2G2_DLST	0.84254	1.14497e-05	0.00660456
A2AKU9_ATP5C1	Q9D2G2_DLST	0.858471	5.14184e-06	0.00462779
Q9Z2I9_SUCLA2	Q9D2G2_DLST	0.896124	4.89815e-07	0.00152161
Q6PB66_LRPPRC	Q9D2G2_DLST	0.875517	1.94806e-06	0.00292732
Q9CQA3_SDHB	Q9D2G2_DLST	0.876613	1.82143e-06	0.0028702
Q61425_HADH	Q9D2G2_DLST	0.872483	2.33843e-06	0.0032311
P52825_CPT2	Q9D2G2_DLST	0.860465	4.62035e-06	0.00440977
Q8BFR5_TUFM	Q9D2G2_DLST	0.851163	7.50847e-06	0.00545818
Q9CR68_UQCRFS1	Q9D2G2_DLST	0.831612	1.88851e-05	0.00835923
Q07417_ACADS	Q9D2G2_DLST	0.895199	5.24248e-07	0.00159669
E9Q7L0_OGDHL	Q9D2G2_DLST	0.864669	3.66776e-06	0.003975
Q99JY0_HADHB	P47934_CRAT	0.851833	7.2584e-06	0.00541924
Q9QXS1_PLEC	P47934_CRAT	0.894057	5.69608e-07	0.00163586
Q8BMS1_HADHA	P47934_CRAT	0.840909	1.23664e-05	0.00685276
P50544_ACADVL	P47934_CRAT	0.90186	3.16799e-07	0.0012412
Q9WUB3_PYGM	P47934_CRAT	0.823347	2.69511e-05	0.00974759
Q60932_VDAC1	P47934_CRAT	0.882687	1.24067e-06	0.00237858
E9Q800_IMMT	P47934_CRAT	0.929752	2.38835e-08	0.000298626
Q8QZT1_ACAT1	P47934_CRAT	0.935467	1.2337e-08	0.000207675
Q9CQ62_DECR1	P47934_CRAT	0.867184	3.18303e-06	0.00369585
P45952_ACADM	P47934_CRAT	0.836875	1.49078e-05	0.00747613
Q9CZ13_UQCRC1	P47934_CRAT	0.883264	1.19494e-06	0.00233555
Q8CI94_PYGB	P47934_CRAT	0.878616	1.60849e-06	0.00269898
O09161_CASQ2	P47934_CRAT	0.857291	5.47362e-06	0.00472659
A2AKU9_ATP5C1	P47934_CRAT	0.847107	9.18574e-06	0.00595993
Q6PB66_LRPPRC	P47934_CRAT	0.850207	7.8782e-06	0.00561721
P52825_CPT2	P47934_CRAT	0.918863	7.30451e-08	0.0005661
Q91ZA3_PCCA	P47934_CRAT	0.92411	4.35178e-08	0.000431413
Q99NB1_ACSS1	P47934_CRAT	0.908058	1.91791e-07	0.000958602
Q9CR68_UQCRFS1	P47934_CRAT	0.846074	9.66099e-06	0.00614926
Q2TPA8_HSDL2	P47934_CRAT	0.839876	1.29789e-05	0.00706556
Q99MR8_MCCC1	P47934_CRAT	0.892101	6.55184e-07	0.00174055
Q9D2G2_DLST	P47934_CRAT	0.826446	2.36369e-05	0.00913928
Q9QXS1_PLEC	Q9JHI5_IVD	0.829546	2.06768e-05	0.00868838
P50544_ACADVL	Q9JHI5_IVD	0.861126	4.458e-06	0.00429063
E9Q800_IMMT	Q9JHI5_IVD	0.865256	3.5494e-06	0.00387726
Q921G7_ETFDH	Q9JHI5_IVD	0.823348	2.69506e-05	0.00974759
Q8QZT1_ACAT1	Q9JHI5_IVD	0.954592	7.87842e-10	3.9593e-05
Q9CZ13_UQCRC1	Q9JHI5_IVD	0.901394	3.28525e-07	0.00127019
A2AKU9_ATP5C1	Q9JHI5_IVD	0.83841	1.38926e-05	0.00722125
Q9Z2I9_SUCLA2	Q9JHI5_IVD	0.857438	5.43119e-06	0.00469621
Q6PB66_LRPPRC	Q9JHI5_IVD	0.836345	1.52727e-05	0.00754118
P52825_CPT2	Q9JHI5_IVD	0.96281	1.63709e-10	1.34728e-05
Q91ZA3_PCCA	Q9JHI5_IVD	0.921569	5.61752e-08	0.000485694
Q9CR68_UQCRFS1	Q9JHI5_IVD	0.916882	8.80323e-08	0.000624955
Q99MR8_MCCC1	Q9JHI5_IVD	0.898865	3.99024e-07	0.00137617
Q07417_ACADS	Q9JHI5_IVD	0.907121	2.0737e-07	0.000985784
E9Q7L0_OGDHL	Q9JHI5_IVD	0.891069	7.04682e-07	0.00182928
Q9D2G2_DLST	Q9JHI5_IVD	0.908622	1.82914e-07	0.000919553
P47934_CRAT	Q9JHI5_IVD	0.910687	1.53365e-07	0.000840848
Q99JY0_HADHB	O55126_NIPSNAP2	0.853898	6.53199e-06	0.00516327
Q9QXS1_PLEC	O55126_NIPSNAP2	0.845995	9.69839e-06	0.00617079
Q8BMS1_HADHA	O55126_NIPSNAP2	0.829029	2.11472e-05	0.00876563
P50544_ACADVL	O55126_NIPSNAP2	0.902893	2.9206e-07	0.00117415
E9Q800_IMMT	O55126_NIPSNAP2	0.932851	1.68129e-08	0.000253403
Q921G7_ETFDH	O55126_NIPSNAP2	0.82584	2.42565e-05	0.00926345
Q8QZT1_ACAT1	O55126_NIPSNAP2	0.954053	8.64447e-10	4.17572e-05
Q9CZ13_UQCRC1	O55126_NIPSNAP2	0.89876	4.02197e-07	0.0013816
O09161_CASQ2	O55126_NIPSNAP2	0.902793	2.94378e-07	0.00118255
Q6PB66_LRPPRC	O55126_NIPSNAP2	0.841942	1.17788e-05	0.00674833
P52825_CPT2	O55126_NIPSNAP2	0.913178	1.23286e-07	0.000752305
Q91ZA3_PCCA	O55126_NIPSNAP2	0.923077	4.83258e-08	0.000445039
Q99NB1_ACSS1	O55126_NIPSNAP2	0.846591	9.4208e-06	0.0060349
Q9CR68_UQCRFS1	O55126_NIPSNAP2	0.925103	3.92878e-08	0.00039993
Q99MR8_MCCC1	O55126_NIPSNAP2	0.889004	8.1343e-07	0.00195059
Q07417_ACADS	O55126_NIPSNAP2	0.844605	1.03731e-05	0.00631416
Q9D2G2_DLST	O55126_NIPSNAP2	0.870868	2.57254e-06	0.00336563
P47934_CRAT	O55126_NIPSNAP2	0.924587	4.14397e-08	0.000415847
Q9JHI5_IVD	O55126_NIPSNAP2	0.94476	3.66327e-09	9.92672e-05
E9PWQ3_COL6A3	Q04857_COL6A1	0.972638	1.44982e-11	2.92868e-06
Q9QXS1_PLEC	P47738_ALDH2	0.833592	1.72937e-05	0.00805725
Q8BMS1_HADHA	P47738_ALDH2	0.828512	2.16264e-05	0.0087973
P50544_ACADVL	P47738_ALDH2	0.887913	8.76484e-07	0.00198907
Q60932_VDAC1	P47738_ALDH2	0.869251	2.82678e-06	0.00347962
E9Q800_IMMT	P47738_ALDH2	0.90031	3.57299e-07	0.00130153
Q8QZT1_ACAT1	P47738_ALDH2	0.900362	3.55882e-07	0.0012991
P45952_ACADM	P47738_ALDH2	0.834286	1.67641e-05	0.00786974
Q9CZ13_UQCRC1	P47738_ALDH2	0.854855	6.21694e-06	0.00500258
P52825_CPT2	P47738_ALDH2	0.902326	3.0542e-07	0.00120329
Q91ZA3_PCCA	P47738_ALDH2	0.848735	8.47753e-06	0.00575689
P47934_CRAT	P47738_ALDH2	0.930785	2.12845e-08	0.000287882
Q9JHI5_IVD	P47738_ALDH2	0.880744	1.40604e-06	0.00253446
O55126_NIPSNAP2	P47738_ALDH2	0.886364	9.73314e-07	0.00209829
Q9WUB3_PYGM	A0A1B0GSX0_LDHA	0.872934	2.27651e-06	0.00318144
Q8CI94_PYGB	A0A1B0GSX0_LDHA	0.866219	3.36205e-06	0.0038229
P47857-3_PFKM	A0A1B0GSX0_LDHA	0.888315	8.52788e-07	0.00196721
E9Q035_GM20425	Q00623_APOA1	0.852273	7.09812e-06	0.00535587
Q61838_PZP	Q00623_APOA1	0.835312	1.60056e-05	0.00778112
P01027_C3	Q00623_APOA1	0.824987	2.51511e-05	0.0094547
Q9QXS1_PLEC	P26443_GLUD1	0.880103	1.46449e-06	0.0025477
Q9WUB3_PYGM	P26443_GLUD1	0.880165	1.45875e-06	0.00254113
Q8CI94_PYGB	P26443_GLUD1	0.861054	4.47542e-06	0.0043066
P52825_CPT2	P26443_GLUD1	0.852196	7.12567e-06	0.00537197
Q91ZA3_PCCA	P26443_GLUD1	0.949923	1.69864e-09	6.18759e-05
P47857-3_PFKM	P26443_GLUD1	0.887281	9.14953e-07	0.0020611
Q99MR8_MCCC1	P26443_GLUD1	0.947858	2.33157e-09	7.3711e-05
Q07417_ACADS	P26443_GLUD1	0.893134	6.08717e-07	0.00171429
O08528_HK2	P26443_GLUD1	0.82438	2.5805e-05	0.00948837
P47934_CRAT	P26443_GLUD1	0.866219	3.36205e-06	0.0038229
Q9JHI5_IVD	P26443_GLUD1	0.879711	1.50135e-06	0.00257952
O55126_NIPSNAP2	P26443_GLUD1	0.865702	3.46142e-06	0.00383583
Q99JY0_HADHB	Q99MN9_PCCB	0.851393	7.42169e-06	0.00542195
P50544_ACADVL	Q99MN9_PCCB	0.852865	6.88698e-06	0.00522979
Q60597_OGDH	Q99MN9_PCCB	0.822497	2.79262e-05	0.00981518
E9Q800_IMMT	Q99MN9_PCCB	0.84667	9.38437e-06	0.00601553
Q8QZT1_ACAT1	Q99MN9_PCCB	0.886481	9.65677e-07	0.00209168
Q9CZ13_UQCRC1	Q99MN9_PCCB	0.858028	5.26434e-06	0.00468009
O09161_CASQ2	Q99MN9_PCCB	0.828942	2.12276e-05	0.00876563
Q8CC88_VWA8	Q99MN9_PCCB	0.857585	5.38926e-06	0.00468144
Q9Z2I9_SUCLA2	Q99MN9_PCCB	0.893596	5.88877e-07	0.00168256
Q6PB66_LRPPRC	Q99MN9_PCCB	0.861126	4.458e-06	0.00429063
P52825_CPT2	Q99MN9_PCCB	0.920455	6.26574e-08	0.00052428
P58281-2_OPA1	Q99MN9_PCCB	0.882353	1.26787e-06	0.00237858
Q91ZA3_PCCA	Q99MN9_PCCB	0.909185	1.74407e-07	0.000897378
Q9CR68_UQCRFS1	Q99MN9_PCCB	0.9365	1.08793e-08	0.000198614
Q99MR8_MCCC1	Q99MN9_PCCB	0.867905	3.05455e-06	0.00362045
Q07417_ACADS	Q99MN9_PCCB	0.9484	2.14804e-09	7.04875e-05
E9Q7L0_OGDHL	Q99MN9_PCCB	0.883841	1.15069e-06	0.0022673
Q9D2G2_DLST	Q99MN9_PCCB	0.891069	7.04682e-07	0.00182928
P47934_CRAT	Q99MN9_PCCB	0.835312	1.60056e-05	0.00778112
Q9JHI5_IVD	Q99MN9_PCCB	0.940144	6.85946e-09	0.000144964
O55126_NIPSNAP2	Q99MN9_PCCB	0.905524	2.36439e-07	0.0010747
P26443_GLUD1	Q99MN9_PCCB	0.871451	2.48583e-06	0.00327866
Q99LC3_NDUFA10	Q9D6J6_NDUFV2	0.954005	8.71489e-10	4.18375e-05
Q60932_VDAC1	E9QQ25_SPEG	0.853306	6.73343e-06	0.00518059
E9Q800_IMMT	E9QQ25_SPEG	0.85493	6.1928e-06	0.00498677
Q8CI94_PYGB	E9QQ25_SPEG	0.856995	5.55954e-06	0.00474786
Q91ZA3_PCCA	E9QQ25_SPEG	0.828689	2.14612e-05	0.00876563
Q99MR8_MCCC1	E9QQ25_SPEG	0.824561	2.56082e-05	0.0094547
P47934_CRAT	E9QQ25_SPEG	0.92824	2.81839e-08	0.000338778
P47738_ALDH2	E9QQ25_SPEG	0.904492	2.5706e-07	0.00109906
E9Q035_GM20425	A0A087WSN6_FN1	0.870868	2.57254e-06	0.00336563
Q61838_PZP	A0A087WSN6_FN1	0.831182	1.9246e-05	0.00842172
P01027_C3	A0A087WSN6_FN1	0.839443	1.32436e-05	0.00713867
A0A0R4J0X5_SERPINA1C	A0A087WSN6_FN1	0.82602	2.40713e-05	0.00920404
E9Q557_DSP	Q9Z2I8_SUCLG2	0.850207	7.87802e-06	0.00561721
P62259_YWHAE	Q9Z2I8_SUCLG2	0.864084	3.78937e-06	0.00403015
Q9WUB3_PYGM	Q8CHT0_ALDH4A1	0.851833	7.2584e-06	0.00541924
Q8QZT1_ACAT1	Q8CHT0_ALDH4A1	0.824561	2.56082e-05	0.0094547
Q91ZA3_PCCA	Q8CHT0_ALDH4A1	0.907121	2.0737e-07	0.000985784
P47857-3_PFKM	Q8CHT0_ALDH4A1	0.852714	6.94032e-06	0.00526104
Q99MR8_MCCC1	Q8CHT0_ALDH4A1	0.900929	3.40618e-07	0.00127082
Q07417_ACADS	Q8CHT0_ALDH4A1	0.888545	8.39466e-07	0.00195059
E9Q7L0_OGDHL	Q8CHT0_ALDH4A1	0.892101	6.55184e-07	0.00174055
Q9JHI5_IVD	Q8CHT0_ALDH4A1	0.872033	2.40176e-06	0.00323667
O55126_NIPSNAP2	Q8CHT0_ALDH4A1	0.831182	1.9246e-05	0.00842172
P26443_GLUD1	Q8CHT0_ALDH4A1	0.909654	1.67577e-07	0.000896334
Q99MN9_PCCB	Q8CHT0_ALDH4A1	0.869969	2.7113e-06	0.00341531
P08249_MDH2	Q9D881_GM11273	0.823955	2.62719e-05	0.00956106
A0A1L1STE6_IDH3A	Q9D881_GM11273	0.822922	2.74351e-05	0.00981518
P27773_PDIA3	P09103_P4HB	0.834711	1.64464e-05	0.00781365
P45952_ACADM	P09671_SOD2	0.830232	2.00664e-05	0.00851357
Q9DCW4_ETFB	P09671_SOD2	0.885906	1.00361e-06	0.00212762
Q9DB20_ATP5O	P09671_SOD2	0.829117	2.10662e-05	0.00876563
P68372_TUBB4B	Q61768_KIF5B	0.858842	5.04125e-06	0.00456074
Q4U4S6-2_XIRP2	Q61768_KIF5B	0.887397	9.07764e-07	0.00204757
P70670_NACA	J3QMG3_VDAC3	0.836945	1.48599e-05	0.00745234
O08528_HK2	J3QMG3_VDAC3	0.845638	9.86813e-06	0.00621674
P51667_MYL2	P97450_ATP5J	0.898865	3.99024e-07	0.00137617
P04247_MB	P97450_ATP5J	0.882809	1.23095e-06	0.00237815
P09542_MYL3	P97450_ATP5J	0.889004	8.1343e-07	0.00195059
Q9D881_GM11273	P97450_ATP5J	0.898865	3.99024e-07	0.00137617
P62631_EEF1A2	Q9D0F9_PGM1	0.902427	3.03005e-07	0.0011968
E9QLJ0_CMYA5	Q9D0F9_PGM1	0.84814	8.73067e-06	0.00588562
P05201_GOT1	Q9D0F9_PGM1	0.835744	1.56958e-05	0.00770268
Q8CGC7_EPRS	Q9D0F9_PGM1	0.880165	1.45875e-06	0.00254113
Q8CHT0_ALDH4A1	Q9D0F9_PGM1	0.82602	2.40713e-05	0.00920404
Q60597_OGDH	Q8QZS1_HIBCH	0.861713	4.31768e-06	0.00423258
Q8CC88_VWA8	Q8QZS1_HIBCH	0.828689	2.14612e-05	0.00876563
Q8BFR5_TUFM	Q8QZS1_HIBCH	0.931819	1.89333e-08	0.000266044
G5E902_SLC25A3	Q08857_CD36	0.847108	9.18554e-06	0.00595993
E9QPE7_MYH11	P57780_ACTN4	0.82189	2.86419e-05	0.00992501
P20152_VIM	P57780_ACTN4	0.852865	6.88698e-06	0.00522979
E9Q035_GM20425	P06728_APOA4	0.856995	5.55954e-06	0.00474786
P01027_C3	P06728_APOA4	0.839009	1.35127e-05	0.00714022
Q00623_APOA1	P06728_APOA4	0.923077	4.83258e-08	0.000445039
B7ZCI2_NEBL	E9Q9C1_ABLIM1	0.828085	2.20301e-05	0.0088575
Q99JY0_HADHB	Q8CGK3_LONP1	0.841073	1.22714e-05	0.00682881
Q60597_OGDH	Q8CGK3_LONP1	0.900929	3.40618e-07	0.00127082
Q9D0K2_OXCT1	Q8CGK3_LONP1	0.934435	1.39613e-08	0.00022931
Q8CC88_VWA8	Q8CGK3_LONP1	0.869969	2.7113e-06	0.00341531
Q6PB66_LRPPRC	Q8CGK3_LONP1	0.889004	8.1343e-07	0.00195059
P58281-2_OPA1	Q8CGK3_LONP1	0.857585	5.38926e-06	0.00468144
Q8BFR5_TUFM	Q8CGK3_LONP1	0.830579	1.97634e-05	0.00845208
Q07417_ACADS	Q8CGK3_LONP1	0.872033	2.40176e-06	0.00323667
Q99MN9_PCCB	Q8CGK3_LONP1	0.865841	3.43451e-06	0.0038229
P20152_VIM	E9Q6R7_UTRN	0.835312	1.60056e-05	0.00778112
Q61292_LAMB2	E9Q6R7_UTRN	0.831612	1.88851e-05	0.00835923
P57780_ACTN4	E9Q6R7_UTRN	0.847624	8.95573e-06	0.0059435
Q64727_VCL	A1BN54_ACTN1	0.863777	3.85441e-06	0.00403015
E9QPE7_MYH11	A1BN54_ACTN1	0.828689	2.14612e-05	0.00876563
Q8BTM8_FLNA	A1BN54_ACTN1	0.925142	3.91302e-08	0.000398847
P26039_TLN1	A1BN54_ACTN1	0.826625	2.34566e-05	0.00910461
Q61941_NNT	Q8JZQ2_AFG3L2	0.896801	4.65886e-07	0.00148646
G5E902_SLC25A3	Q8JZQ2_AFG3L2	0.922521	5.11e-08	0.000465921
Q08857_CD36	Q8JZQ2_AFG3L2	0.865841	3.43451e-06	0.0038229
Q8CGC7_EPRS	Q1XH17_TRIM72	0.887855	8.79941e-07	0.00199429
Q9D0F9_PGM1	Q1XH17_TRIM72	0.86615	3.37518e-06	0.0038229
P09542_MYL3	P56391_COX6B1	0.867184	3.18303e-06	0.00369585
P08249_MDH2	P56391_COX6B1	0.846512	9.45728e-06	0.0060498
A0A0R4J083_ACADL	P56391_COX6B1	0.832645	1.80396e-05	0.00812975
A0A087WSN6_FN1	E9Q8I0_CFH	0.828085	2.20301e-05	0.0088575
B7ZCI2_NEBL	Q9JLV1_BAG3	0.855521	6.00563e-06	0.00491959
Q8VHX6_FLNC	P21981_TGM2	0.834881	1.63204e-05	0.00778112
P04117_FABP4	A2ASS6-3_TTN	0.844445	1.04536e-05	0.00635074
D3Z041_ACSL1	Q9Z2Z6_SLC25A20	0.83841	1.38926e-05	0.00722125
P52825_CPT2	Q9Z2Z6_SLC25A20	0.842377	1.15385e-05	0.00664468
Q99NB1_ACSS1	Q9Z2Z6_SLC25A20	0.838843	1.36172e-05	0.00716672
Q99LC5_ETFA	P12787_COX5A	0.861126	4.458e-06	0.00429063
Q9DB20_ATP5O	P12787_COX5A	0.853898	6.53199e-06	0.00516327
P08249_MDH2	P20108_PRDX3	0.824987	2.51511e-05	0.0094547
P05202_GOT2	P20108_PRDX3	0.83428	1.67683e-05	0.00786974
P14152_MDH1	P20108_PRDX3	0.877646	1.70878e-06	0.00274659
Q9CQA3_SDHB	P20108_PRDX3	0.828689	2.14612e-05	0.00876563
Q8QZS1_HIBCH	P20108_PRDX3	0.834881	1.63204e-05	0.00778112
P09103_P4HB	Q9CZ19_MYL4	0.874548	2.06605e-06	0.00304692
Q9QVP4_MYL7	Q9CZ19_MYL4	0.977296	3.30602e-12	9.88898e-07
Q91VD9_NDUFS1	Q9DCT2_NDUFS3	0.822038	2.84653e-05	0.00992501
Q91WD5_NDUFS2	Q9DCT2_NDUFS3	0.849018	8.35941e-06	0.00573945
Q60597_OGDH	Q8R4N0_CLYBL	0.865841	3.43451e-06	0.0038229
Q8CC88_VWA8	Q8R4N0_CLYBL	0.867905	3.05455e-06	0.00362045
Q8BFR5_TUFM	Q8R4N0_CLYBL	0.908058	1.91784e-07	0.000958602
Q8QZS1_HIBCH	Q8R4N0_CLYBL	0.907121	2.0737e-07	0.000985784
Q8CGK3_LONP1	Q8R4N0_CLYBL	0.847265	9.11495e-06	0.0059435
Q8K0E8_FGB	P20918_PLG	0.855963	5.86885e-06	0.00491708
E9Q800_IMMT	P16332_MUT	0.845558	9.90641e-06	0.00622501
Q9D0K2_OXCT1	P16332_MUT	0.884814	1.07923e-06	0.00223022
P58281-2_OPA1	P16332_MUT	0.84667	9.38437e-06	0.00601553
Q99MR8_MCCC1	P16332_MUT	0.832215	1.83875e-05	0.00819496
Q07417_ACADS	P16332_MUT	0.864223	3.76011e-06	0.00403015
Q9Z0X1_AIFM1	P16332_MUT	0.821706	2.88618e-05	0.00998363
Q99MN9_PCCB	P16332_MUT	0.84667	9.38437e-06	0.00601553
Q8CGK3_LONP1	P16332_MUT	0.894166	5.65121e-07	0.00162628
Q8K0E8_FGB	Q3UER8_FGG	0.975232	6.58873e-12	1.68005e-06
P20918_PLG	Q3UER8_FGG	0.839443	1.32436e-05	0.00713867
A0A1L1SQ51_TLN2	P63101_YWHAZ	0.880289	1.44734e-06	0.00253459
P70670_NACA	A0A0G2JFH2_MAP4	0.853457	6.68154e-06	0.00516327
O08528_HK2	A0A0G2JFH2_MAP4	0.844605	1.03731e-05	0.00631416
Q8CHT0_ALDH4A1	A0A0G2JFH2_MAP4	0.880289	1.44734e-06	0.00253459
Q9D0F9_PGM1	A0A0G2JFH2_MAP4	0.829117	2.10662e-05	0.00876563
E9Q8Q6_CCDC141	Q8BL66_EEA1	0.875841	1.90987e-06	0.00290727
P26041_MSN	F8WIV2_SERPINB6A	0.858028	5.26434e-06	0.00468009
P05201_GOT1	P97443_SMYD1	0.831095	1.93202e-05	0.00842172
Q8CGC7_EPRS	P97443_SMYD1	0.827479	2.26126e-05	0.00903705
A8DUK4_HBB-BS	Q61171_PRDX2	0.921012	5.93387e-08	0.000501886
P08032_SPTA1	Q61171_PRDX2	0.93237	1.77745e-08	0.000262553
Q91VB8_HBA-A1	Q61171_PRDX2	0.833247	1.7562e-05	0.00810038
Q3UGX2_SPTB	Q61171_PRDX2	0.906557	2.17265e-07	0.00100697
Q99JY0_HADHB	Q60936_COQ8A	0.866736	3.26505e-06	0.00376924
Q8QZT1_ACAT1	Q60936_COQ8A	0.823348	2.69506e-05	0.00974759
Q9CQ62_DECR1	Q60936_COQ8A	0.832472	1.81793e-05	0.00818304
Q91ZA3_PCCA	Q60936_COQ8A	0.866736	3.26505e-06	0.00376924
Q9CR68_UQCRFS1	Q60936_COQ8A	0.870284	2.6619e-06	0.00341531
Q99MR8_MCCC1	Q60936_COQ8A	0.832645	1.80396e-05	0.00812975
P47934_CRAT	Q60936_COQ8A	0.843411	1.09846e-05	0.00652285
Q9JHI5_IVD	Q60936_COQ8A	0.830579	1.97634e-05	0.00845208
O55126_NIPSNAP2	Q60936_COQ8A	0.823773	2.64738e-05	0.00961877
P26443_GLUD1	Q60936_COQ8A	0.823773	2.64738e-05	0.00961877
Q99MN9_PCCB	Q60936_COQ8A	0.890496	7.33489e-07	0.00183517
Q8CGK3_LONP1	Q60936_COQ8A	0.839876	1.29786e-05	0.00706556
P11499_HSP90AB1	P42932_CCT8	0.8508	7.64686e-06	0.0054956
E9Q035_GM20425	Q91X72_HPX	0.914817	1.06418e-07	0.000696072
A0A0R4J0X5_SERPINA1C	Q91X72_HPX	0.828689	2.14612e-05	0.00876563
A0A087WSN6_FN1	Q91X72_HPX	0.852865	6.88698e-06	0.00522979
P14152_MDH1	Q9D172_D10JHU81E	0.892101	6.55184e-07	0.00174055
Q9CQA3_SDHB	Q9D172_D10JHU81E	0.841073	1.22714e-05	0.00682881
Q61425_HADH	Q9D172_D10JHU81E	0.863777	3.85441e-06	0.00403015
Q8BFR5_TUFM	Q9D172_D10JHU81E	0.848141	8.73047e-06	0.00588562
Q8QZS1_HIBCH	Q9D172_D10JHU81E	0.851393	7.42169e-06	0.00542195
P20108_PRDX3	Q9D172_D10JHU81E	0.905057	2.45589e-07	0.00107817
Q60675_LAMA2	P10493_NID1	0.828586	2.15572e-05	0.0087973
P04117_FABP4	P10493_NID1	0.865425	3.51586e-06	0.00387726
E9QN70_LAMB1	P10493_NID1	0.830405	1.99147e-05	0.00850441
F8VQJ3_LAMC1	P10493_NID1	0.87177	2.4394e-06	0.00326064
A2AKU9_ATP5C1	Q9DCM2_GSTK1	0.891529	6.82239e-07	0.00179768
E9Q7L0_OGDHL	Q9DCM2_GSTK1	0.832645	1.804e-05	0.00812975
Q9JHI5_IVD	Q9DCM2_GSTK1	0.83841	1.38926e-05	0.00722125
P14824_ANXA6	Q11011_NPEPPS	0.865876	3.42785e-06	0.0038229
P47857-3_PFKM	Q11011_NPEPPS	0.836704	1.50247e-05	0.0075028
Q8CGC7_EPRS	Q11011_NPEPPS	0.8405	1.26059e-05	0.00691676
E9Q557_DSP	Q9CQN1_TRAP1	0.87849	1.62118e-06	0.00269898
Q9Z2I8_SUCLG2	Q9CQN1_TRAP1	0.824381	2.58045e-05	0.00948837
Q91YT0_NDUFV1	Q9Z1P6_NDUFA7	0.869969	2.7113e-06	0.00341531
Q3UIK0_MYBPC3	Q9JJW5_MYOZ2	0.827052	2.30314e-05	0.00910461
Q62234_MYOM1	Q9JJW5_MYOZ2	0.862158	4.21396e-06	0.00423258
B7ZCI2_NEBL	Q9JJW5_MYOZ2	0.867321	3.15826e-06	0.0036745
J3QQ13_TNNT2	Q9JJW5_MYOZ2	0.881776	1.31599e-06	0.00242153
Q62234_MYOM1	P45376_AKR1B1	0.823955	2.62719e-05	0.00956106
J3QQ13_TNNT2	P45376_AKR1B1	0.843573	1.09e-05	0.00652285
P58281-2_OPA1	P45376_AKR1B1	0.900362	3.55882e-07	0.0012991
Q91VA7_IDH3B	P45376_AKR1B1	0.865116	3.57722e-06	0.00390025
Q07417_ACADS	P45376_AKR1B1	0.853898	6.53199e-06	0.00516327
Q9D0F9_PGM1	P45376_AKR1B1	0.832645	1.804e-05	0.00812975
F8WID5_TPM1	E9Q456_TPM1	0.868353	2.977e-06	0.00361447
P09542_MYL3	E9Q456_TPM1	0.883264	1.19494e-06	0.00233555
Q9QXS1_PLEC	Q8BMF3_ME3	0.823773	2.64738e-05	0.00961877
E9Q800_IMMT	Q8BMF3_ME3	0.84814	8.73067e-06	0.00588562
Q8QZT1_ACAT1	Q8BMF3_ME3	0.85493	6.1928e-06	0.00498677
Q9CZ13_UQCRC1	Q8BMF3_ME3	0.827479	2.26126e-05	0.00903705
O09161_CASQ2	Q8BMF3_ME3	0.843847	1.07576e-05	0.00650383
Q9CQQ7_ATP5F1	Q8BMF3_ME3	0.870351	2.65152e-06	0.00341531
P52825_CPT2	Q8BMF3_ME3	0.824806	2.53444e-05	0.0094547
Q91ZA3_PCCA	Q8BMF3_ME3	0.898296	4.16551e-07	0.00140667
Q99MR8_MCCC1	Q8BMF3_ME3	0.863191	3.98148e-06	0.00409069
P47934_CRAT	Q8BMF3_ME3	0.915289	1.01943e-07	0.000679368
Q9JHI5_IVD	Q8BMF3_ME3	0.835312	1.60056e-05	0.00778112
O55126_NIPSNAP2	Q8BMF3_ME3	0.892562	6.34087e-07	0.00171735
P47738_ALDH2	Q8BMF3_ME3	0.846074	9.66099e-06	0.00614926
P26443_GLUD1	Q8BMF3_ME3	0.822314	2.81405e-05	0.00984889
E9QQ25_SPEG	Q8BMF3_ME3	0.884874	1.07498e-06	0.00222584
Q8CHT0_ALDH4A1	Q8BMF3_ME3	0.829117	2.10662e-05	0.00876563
P26041_MSN	P17742_PPIA	0.861713	4.31768e-06	0.00423258
P27773_PDIA3	P08113_HSP90B1	0.85493	6.1928e-06	0.00498677
P26041_MSN	A0A1D5RM59_TNS1	0.83015	2.01385e-05	0.00851357
O54724_CAVIN1	A0A1D5RM59_TNS1	0.896694	4.69588e-07	0.00149124
Q00623_APOA1	P21614_GC	0.919421	6.92439e-08	0.00054811
P06728_APOA4	P21614_GC	0.93237	1.77745e-08	0.000262553
E9Q414_APOB	P21614_GC	0.822314	2.81405e-05	0.00984889
P20152_VIM	P24527_LTA4H	0.882353	1.26787e-06	0.00237858
P09103_P4HB	P24527_LTA4H	0.841508	1.2023e-05	0.00682881
P57780_ACTN4	P24527_LTA4H	0.823955	2.62719e-05	0.00956106
Q62234_MYOM1	Q8K0D5_GFM1	0.872033	2.40176e-06	0.00323667
B7ZCI2_NEBL	Q8K0D5_GFM1	0.855521	6.00563e-06	0.00491959
J3QQ13_TNNT2	Q8K0D5_GFM1	0.822497	2.79262e-05	0.00981518
P05201_GOT1	Q8K0D5_GFM1	0.82602	2.40713e-05	0.00920404
Q91VA7_IDH3B	Q8K0D5_GFM1	0.838843	1.36169e-05	0.00716672
P45376_AKR1B1	Q8K0D5_GFM1	0.933402	1.57681e-08	0.000239512
Q8CGC7_EPRS	Q6ZQ73_CAND2	0.83015	2.01385e-05	0.00851357
O08528_HK2	Q6ZQ73_CAND2	0.923077	4.83258e-08	0.000445039
Q9R0H0-2_ACOX1	Q6ZQ73_CAND2	0.895199	5.24248e-07	0.00159669
P28665_MUG1	A0A0R4J038_KNG1	0.863777	3.85441e-06	0.00403015
A0A0R4J0X5_SERPINA1C	A0A0R4J038_KNG1	0.839009	1.35127e-05	0.00714022
Q8BH59_SLC25A12	Q8JZN5_ACAD9	0.837377	1.45686e-05	0.00745234
E9Q035_GM20425	G3X8Q5_CP	0.874548	2.06605e-06	0.00304692
A0A0R4J0X5_SERPINA1C	G3X8Q5_CP	0.822497	2.79262e-05	0.00981518
A0A087WSN6_FN1	G3X8Q5_CP	0.868353	2.977e-06	0.00361447
E9Q8I0_CFH	G3X8Q5_CP	0.822497	2.79262e-05	0.00981518
Q91X72_HPX	G3X8Q5_CP	0.913313	1.21822e-07	0.000748656
Q60597_OGDH	Q9DBL1_ACADSB	0.872483	2.33843e-06	0.0032311
P11404_FABP3	Q9DBL1_ACADSB	0.847703	8.92108e-06	0.0059435
Q9R0Y5-2_AK1	Q9DBL1_ACADSB	0.835659	1.57563e-05	0.00773016
E9Q9C1_ABLIM1	Q9DBL1_ACADSB	0.830579	1.97638e-05	0.00845208
Q91Z83_MYH7	Q61001_LAMA5	0.847265	9.11495e-06	0.0059435
Q62261_SPTBN1	Q61001_LAMA5	0.880289	1.44734e-06	0.00253459
Q9DCX2_ATP5H	Q9CQB4_UQCRB	0.903926	2.69009e-07	0.00113919
P45952_ACADM	Q9CQB4_UQCRB	0.834803	1.63778e-05	0.00780826
Q8BH95_ECHS1	Q9CQB4_UQCRB	0.831612	1.88851e-05	0.00835923
Q9DCW4_ETFB	Q9CQB4_UQCRB	0.83781	1.42822e-05	0.00737789
P50544_ACADVL	Q3ULD5_MCCC2	0.871901	2.42063e-06	0.00324104
Q60597_OGDH	Q3ULD5_MCCC2	0.828085	2.20301e-05	0.0088575
E9Q800_IMMT	Q3ULD5_MCCC2	0.867769	3.0785e-06	0.00363169
Q8QZT1_ACAT1	Q3ULD5_MCCC2	0.930305	2.24608e-08	0.000296572
Q9CZ13_UQCRC1	Q3ULD5_MCCC2	0.889463	7.88079e-07	0.00191711
Q9Z2I9_SUCLA2	Q3ULD5_MCCC2	0.892507	6.36593e-07	0.00172234
Q6PB66_LRPPRC	Q3ULD5_MCCC2	0.873967	2.13983e-06	0.00306252
Q61425_HADH	Q3ULD5_MCCC2	0.828085	2.20301e-05	0.0088575
P52825_CPT2	Q3ULD5_MCCC2	0.892507	6.36593e-07	0.00172234
P58281-2_OPA1	Q3ULD5_MCCC2	0.858028	5.26434e-06	0.00468009
Q91ZA3_PCCA	Q3ULD5_MCCC2	0.930305	2.24608e-08	0.000296572
Q9CR68_UQCRFS1	Q3ULD5_MCCC2	0.865186	3.5633e-06	0.00389053
Q99MR8_MCCC1	Q3ULD5_MCCC2	0.92411	4.35178e-08	0.000431413
Q07417_ACADS	Q3ULD5_MCCC2	0.966443	7.27679e-11	8.77403e-06
E9Q7L0_OGDHL	Q3ULD5_MCCC2	0.876033	1.88752e-06	0.00287861
Q9D2G2_DLST	Q3ULD5_MCCC2	0.943182	4.56624e-09	0.000114187
P47934_CRAT	Q3ULD5_MCCC2	0.857438	5.43132e-06	0.00469621
Q9JHI5_IVD	Q3ULD5_MCCC2	0.951988	1.22078e-09	5.13198e-05
O55126_NIPSNAP2	Q3ULD5_MCCC2	0.912707	1.28553e-07	0.000767876
P26443_GLUD1	Q3ULD5_MCCC2	0.894628	5.46515e-07	0.00160117
Q99MN9_PCCB	Q3ULD5_MCCC2	0.94063	6.43675e-09	0.000142417
Q8CHT0_ALDH4A1	Q3ULD5_MCCC2	0.907589	1.99451e-07	0.000982055
Q9D0F9_PGM1	Q3ULD5_MCCC2	0.830579	1.97638e-05	0.00845208
Q8CGK3_LONP1	Q3ULD5_MCCC2	0.832215	1.83875e-05	0.00819496
P16332_MUT	Q3ULD5_MCCC2	0.856405	5.73468e-06	0.00485964
Q60936_COQ8A	Q3ULD5_MCCC2	0.828941	2.12284e-05	0.00876563
P11531_DMD	F6ZDS4_TPR	0.834194	1.6833e-05	0.00789558
P14733_LMNB1	F6ZDS4_TPR	0.90031	3.57299e-07	0.00130153
E9PWQ3_COL6A3	Q02788_COL6A2	0.926175	3.51314e-08	0.000382931
P20152_VIM	Q02788_COL6A2	0.847703	8.92108e-06	0.0059435
Q5SXR6_CLTC	Q02788_COL6A2	0.835312	1.60056e-05	0.00778112
Q04857_COL6A1	Q02788_COL6A2	0.940599	6.46287e-09	0.000142589
P57780_ACTN4	Q02788_COL6A2	0.844008	1.0675e-05	0.006459
P21981_TGM2	Q60864_STIP1	0.909091	1.75793e-07	0.000900081
P20029_HSPA5	P11983_TCP1	0.857438	5.43119e-06	0.00469621
P26041_MSN	P26043_RDX	0.870418	2.64116e-06	0.00341531
P17563_SELENBP1	P26043_RDX	0.84333	1.1027e-05	0.00652285
Q02053_UBA1	P26043_RDX	0.859061	4.98269e-06	0.00451538
P17742_PPIA	P26043_RDX	0.890036	7.57373e-07	0.00186192
Q60597_OGDH	P70404_IDH3G	0.82189	2.86419e-05	0.00992501
Q9Z2I9_SUCLA2	P70404_IDH3G	0.889923	7.63376e-07	0.00187018
Q6PB66_LRPPRC	P70404_IDH3G	0.857438	5.43132e-06	0.00469621
Q8BFR5_TUFM	P70404_IDH3G	0.856848	5.60294e-06	0.00477637
Q91ZA3_PCCA	P70404_IDH3G	0.84667	9.38437e-06	0.00601553
Q91VA7_IDH3B	P70404_IDH3G	0.859432	4.88467e-06	0.00448614
Q99MR8_MCCC1	P70404_IDH3G	0.824987	2.51511e-05	0.0094547
Q07417_ACADS	P70404_IDH3G	0.908622	1.82914e-07	0.000919553
E9Q7L0_OGDHL	P70404_IDH3G	0.825413	2.47006e-05	0.00938355
Q9D2G2_DLST	P70404_IDH3G	0.886364	9.73314e-07	0.00209829
Q9JHI5_IVD	P70404_IDH3G	0.82602	2.40713e-05	0.00920404
Q99MN9_PCCB	P70404_IDH3G	0.873516	2.19861e-06	0.00309791
Q8CHT0_ALDH4A1	P70404_IDH3G	0.84254	1.14497e-05	0.00660456
Q8CGK3_LONP1	P70404_IDH3G	0.82602	2.40713e-05	0.00920404
P45376_AKR1B1	P70404_IDH3G	0.832645	1.804e-05	0.00812975
Q3ULD5_MCCC2	P70404_IDH3G	0.921488	5.66264e-08	0.000487967
Q3UIK0_MYBPC3	Q8R5L1_C1QBP	0.839009	1.35127e-05	0.00714022
B7ZCI2_NEBL	Q8R5L1_C1QBP	0.824561	2.56082e-05	0.0094547
Q9CPP6_NDUFA5	Q8R5L1_C1QBP	0.82189	2.86419e-05	0.00992501
Q07417_ACADS	P16045_LGALS1	0.830753	1.96126e-05	0.00842172
P45376_AKR1B1	P16045_LGALS1	0.860093	4.71408e-06	0.00445278
A3KGU9_SPTAN1	P97927_LAMA4	0.851393	7.42169e-06	0.00542195
P48678_LMNA	P97927_LAMA4	0.826625	2.34566e-05	0.00910461
P57780_ACTN4	P97927_LAMA4	0.82602	2.40713e-05	0.00920404
E9Q6R7_UTRN	P97927_LAMA4	0.823955	2.62719e-05	0.00956106
P63101_YWHAZ	P97927_LAMA4	0.822497	2.79262e-05	0.00981518
Q9WUB3_PYGM	Q8VDJ3_HDLBP	0.900362	3.55882e-07	0.0012991
Q8CI94_PYGB	Q8VDJ3_HDLBP	0.878678	1.60217e-06	0.00269704
P14824_ANXA6	Q8VDJ3_HDLBP	0.82602	2.40713e-05	0.00920404
P47857-3_PFKM	Q8VDJ3_HDLBP	0.881655	1.3263e-06	0.00243403
A0A1B0GSX0_LDHA	Q8VDJ3_HDLBP	0.840475	1.26206e-05	0.00691676
O08788_DCTN1	Q8VDJ3_HDLBP	0.838843	1.36169e-05	0.00716672
Q62234_MYOM1	P49813_TMOD1	0.896801	4.65886e-07	0.00148646
B7ZCI2_NEBL	P49813_TMOD1	0.869969	2.7113e-06	0.00341531
J3QQ13_TNNT2	P49813_TMOD1	0.888545	8.39466e-07	0.00195059
Q9JJW5_MYOZ2	P49813_TMOD1	0.839443	1.32436e-05	0.00713867
A0A1B0GSX0_LDHA	E9PZF0_GM20390	0.82593	2.41638e-05	0.00923555
Q9D0F9_PGM1	E9PZF0_GM20390	0.850207	7.8782e-06	0.00561721
P12787_COX5A	Q62425_NDUFA4	0.836945	1.48599e-05	0.00745234
Q07417_ACADS	Q76MZ3_PPP2R1A	0.831182	1.9246e-05	0.00842172
Q9D051_PDHB	Q9CQR4_ACOT13	0.878678	1.60217e-06	0.00269704
P67778_PHB	Q9CQR4_ACOT13	0.859649	4.828e-06	0.00445541
P29758_OAT	Q80XN0_BDH1	0.834711	1.6446e-05	0.00781365
O88569_HNRNPA2B1	Q9D0E1_HNRNPM	0.862766	4.07582e-06	0.00417548
P07309_TTR	P32261_SERPINC1	0.877646	1.70878e-06	0.00274659
Q8K0D5_GFM1	A6H644_PPP1R12B	0.823955	2.62719e-05	0.00956106
Q60675_LAMA2	Q9QYR9_ACOT2	0.838677	1.37224e-05	0.00721075
A0A286YCI8_SORBS1	P61982_YWHAG	0.833766	1.71595e-05	0.00803092
Q02053_UBA1	P50396_GDI1	0.82189	2.86419e-05	0.00992501
P50544_ACADVL	O35855_BCAT2	0.866288	3.34893e-06	0.00381948
Q60597_OGDH	O35855_BCAT2	0.859649	4.828e-06	0.00445541
E9Q800_IMMT	O35855_BCAT2	0.851833	7.2584e-06	0.00541924
O35459_ECH1	O35855_BCAT2	0.822314	2.814e-05	0.00984889
Q8QZT1_ACAT1	O35855_BCAT2	0.900929	3.40618e-07	0.00127082
Q9CZ13_UQCRC1	O35855_BCAT2	0.865256	3.5494e-06	0.00387726
Q6PB66_LRPPRC	O35855_BCAT2	0.874548	2.06605e-06	0.00304692
Q61425_HADH	O35855_BCAT2	0.845201	1.0079e-05	0.00622501
P52825_CPT2	O35855_BCAT2	0.910124	1.6097e-07	0.000875173
P58281-2_OPA1	O35855_BCAT2	0.845201	1.0079e-05	0.00622501
Q91ZA3_PCCA	O35855_BCAT2	0.855521	6.00563e-06	0.00491959
Q9CR68_UQCRFS1	O35855_BCAT2	0.923077	4.83258e-08	0.000445039
Q99MR8_MCCC1	O35855_BCAT2	0.849329	8.23106e-06	0.0056813
Q07417_ACADS	O35855_BCAT2	0.909185	1.74407e-07	0.000897378
O08528_HK2	O35855_BCAT2	0.837377	1.45686e-05	0.00745234
Q9D2G2_DLST	O35855_BCAT2	0.922045	5.35875e-08	0.000482916
P47934_CRAT	O35855_BCAT2	0.829117	2.10662e-05	0.00876563
Q9JHI5_IVD	O35855_BCAT2	0.933953	1.47815e-08	0.000230145
O55126_NIPSNAP2	O35855_BCAT2	0.911719	1.40209e-07	0.000822643
Q99MN9_PCCB	O35855_BCAT2	0.921569	5.61752e-08	0.000485694
Q9Z2Z6_SLC25A20	O35855_BCAT2	0.881776	1.31599e-06	0.00242153
Q3ULD5_MCCC2	O35855_BCAT2	0.931337	1.99988e-08	0.000274794
P48962_SLC25A4	D3Z7X0_ACAD12	0.863777	3.85441e-06	0.00403015
Q9D051_PDHB	D3Z7X0_ACAD12	0.831182	1.9246e-05	0.00842172
P67778_PHB	D3Z7X0_ACAD12	0.859649	4.828e-06	0.00445541
Q8VDJ3_HDLBP	Q6NZJ6_EIF4G1	0.834711	1.6446e-05	0.00781365
Q64727_VCL	Q8VCQ8_CALD1	0.822922	2.74351e-05	0.00981518
E9QPE7_MYH11	Q8VCQ8_CALD1	0.92411	4.35178e-08	0.000431413
Q8BTM8_FLNA	Q8VCQ8_CALD1	0.896178	4.87884e-07	0.00151865
P57780_ACTN4	Q8VCQ8_CALD1	0.841942	1.17788e-05	0.00674833
A1BN54_ACTN1	Q8VCQ8_CALD1	0.950955	1.44258e-09	5.85854e-05
P08249_MDH2	P99029_PRDX5	0.904492	2.5706e-07	0.00109906
P14152_MDH1	P99029_PRDX5	0.83015	2.01385e-05	0.00851357
Q9CQA3_SDHB	P99029_PRDX5	0.865841	3.43451e-06	0.0038229
Q9DB77_UQCRC2	P99029_PRDX5	0.843137	1.1129e-05	0.00652285
Q9D881_GM11273	P99029_PRDX5	0.888545	8.39466e-07	0.00195059
P20108_PRDX3	P99029_PRDX5	0.890609	7.27747e-07	0.00182928
Q9D172_D10JHU81E	P99029_PRDX5	0.843137	1.1129e-05	0.00652285
Q9Z2I9_SUCLA2	A0A0R4J0S3_RTN4IP1	0.841943	1.17785e-05	0.00674833
P52825_CPT2	A0A0R4J0S3_RTN4IP1	0.860538	4.6023e-06	0.00439454
Q91ZA3_PCCA	A0A0R4J0S3_RTN4IP1	0.905057	2.45589e-07	0.00107817
Q99MR8_MCCC1	A0A0R4J0S3_RTN4IP1	0.896801	4.65886e-07	0.00148646
Q07417_ACADS	A0A0R4J0S3_RTN4IP1	0.863777	3.85441e-06	0.00403015
E9Q7L0_OGDHL	A0A0R4J0S3_RTN4IP1	0.918947	7.24635e-08	0.000563276
O08528_HK2	A0A0R4J0S3_RTN4IP1	0.823955	2.62719e-05	0.00956106
P47934_CRAT	A0A0R4J0S3_RTN4IP1	0.85493	6.1928e-06	0.00498677
Q9JHI5_IVD	A0A0R4J0S3_RTN4IP1	0.894737	5.42211e-07	0.0015988
P26443_GLUD1	A0A0R4J0S3_RTN4IP1	0.900362	3.55882e-07	0.0012991
Q99MN9_PCCB	A0A0R4J0S3_RTN4IP1	0.878225	1.64827e-06	0.00269898
Q8CHT0_ALDH4A1	A0A0R4J0S3_RTN4IP1	0.950464	1.55976e-09	5.88859e-05
A0A0G2JFH2_MAP4	A0A0R4J0S3_RTN4IP1	0.886481	9.65677e-07	0.00209168
Q9DCM2_GSTK1	A0A0R4J0S3_RTN4IP1	0.887971	8.73029e-07	0.00198238
Q8BMF3_ME3	A0A0R4J0S3_RTN4IP1	0.83841	1.38926e-05	0.00722125
Q3ULD5_MCCC2	A0A0R4J0S3_RTN4IP1	0.883841	1.15069e-06	0.0022673
P70404_IDH3G	A0A0R4J0S3_RTN4IP1	0.836345	1.52727e-05	0.00754118
O35855_BCAT2	A0A0R4J0S3_RTN4IP1	0.832817	1.79019e-05	0.00810038
P52480_PKM	Q3U3J1_BCKDHA	0.876613	1.82143e-06	0.0028702
O35459_ECH1	Q3U3J1_BCKDHA	0.822222	2.82482e-05	0.00988459
P58281-2_OPA1	Q3U3J1_BCKDHA	0.880744	1.40604e-06	0.00253446
Q91ZA3_PCCA	Q3U3J1_BCKDHA	0.843573	1.09e-05	0.00652285
P47857-3_PFKM	Q3U3J1_BCKDHA	0.840228	1.27674e-05	0.00698233
Q91VA7_IDH3B	Q3U3J1_BCKDHA	0.848579	8.54345e-06	0.00579155
Q8CGC7_EPRS	Q3U3J1_BCKDHA	0.847624	8.95573e-06	0.0059435
Q99MR8_MCCC1	Q3U3J1_BCKDHA	0.847703	8.92108e-06	0.0059435
Q07417_ACADS	Q3U3J1_BCKDHA	0.902427	3.03005e-07	0.0011968
O08528_HK2	Q3U3J1_BCKDHA	0.88843	8.46112e-07	0.00195523
P26443_GLUD1	Q3U3J1_BCKDHA	0.865702	3.46142e-06	0.00383583
Q8CHT0_ALDH4A1	Q3U3J1_BCKDHA	0.864223	3.76011e-06	0.00403015
Q9D0F9_PGM1	Q3U3J1_BCKDHA	0.913223	1.22797e-07	0.000750201
P45376_AKR1B1	Q3U3J1_BCKDHA	0.869318	2.81576e-06	0.0034721
Q3ULD5_MCCC2	Q3U3J1_BCKDHA	0.911157	1.47246e-07	0.000824445
P70404_IDH3G	Q3U3J1_BCKDHA	0.883264	1.19494e-06	0.00233555
P16045_LGALS1	Q3U3J1_BCKDHA	0.839443	1.32436e-05	0.00713867
A3KGU9_SPTAN1	Q91VW5_GOLGA4	0.833678	1.72271e-05	0.00803092
P20152_VIM	O35452_TNXB	0.858028	5.26434e-06	0.00468009
Q61292_LAMB2	O35452_TNXB	0.831095	1.93202e-05	0.00842172
P26041_MSN	O35452_TNXB	0.848735	8.47753e-06	0.00575689
P57780_ACTN4	O35452_TNXB	0.822314	2.81405e-05	0.00984889
E9Q6R7_UTRN	O35452_TNXB	0.907025	2.09025e-07	0.000986416
P24527_LTA4H	O35452_TNXB	0.82602	2.40713e-05	0.00920404
Q02788_COL6A2	O35452_TNXB	0.823347	2.69511e-05	0.00974759
Q91VD9_NDUFS1	E9QPX3_NDUFS4	0.830403	1.99162e-05	0.00850441
Q8QZT1_ACAT1	Q91VM9_PPA2	0.863191	3.98148e-06	0.00409069
Q8BH95_ECHS1	Q91VM9_PPA2	0.915289	1.01943e-07	0.000679368
P42125_ECI1	Q91VM9_PPA2	0.823591	2.66764e-05	0.00968606
P47934_CRAT	Q91VM9_PPA2	0.83626	1.53316e-05	0.00756646
E9PWQ3_COL6A3	P07356_ANXA2	0.870868	2.57247e-06	0.00336563
P20152_VIM	P07356_ANXA2	0.933885	1.49e-08	0.000231309
Q04857_COL6A1	P07356_ANXA2	0.83876	1.36697e-05	0.00719048
Q02788_COL6A2	P07356_ANXA2	0.832041	1.85294e-05	0.00824401
O35452_TNXB	P07356_ANXA2	0.826873	2.32086e-05	0.00910461
Q9Z2I9_SUCLA2	E9QMK9_DGLUCY	0.830491	1.98397e-05	0.0084792
E9QLJ0_CMYA5	E9QMK9_DGLUCY	0.82438	2.5805e-05	0.00948837
Q91ZA3_PCCA	E9QMK9_DGLUCY	0.841508	1.2023e-05	0.00682881
Q99MR8_MCCC1	E9QMK9_DGLUCY	0.863191	3.98148e-06	0.00409069
Q07417_ACADS	E9QMK9_DGLUCY	0.858028	5.26434e-06	0.00468009
P26443_GLUD1	E9QMK9_DGLUCY	0.832645	1.804e-05	0.00812975
Q9D0F9_PGM1	E9QMK9_DGLUCY	0.835744	1.56958e-05	0.00770268
Q3ULD5_MCCC2	E9QMK9_DGLUCY	0.864153	3.77483e-06	0.00403015
P70404_IDH3G	E9QMK9_DGLUCY	0.871901	2.42063e-06	0.00324104
Q3U3J1_BCKDHA	E9QMK9_DGLUCY	0.88688	9.40061e-07	0.00209168
P20152_VIM	Q9DBG3-2_AP2B1	0.876161	1.87278e-06	0.0028702
P57780_ACTN4	Q9DBG3-2_AP2B1	0.832215	1.83875e-05	0.00819496
P24527_LTA4H	Q9DBG3-2_AP2B1	0.832817	1.79019e-05	0.00810038
O35452_TNXB	Q9DBG3-2_AP2B1	0.837377	1.45686e-05	0.00745234
A8DUK4_HBB-BS	E9QNT8_ANK1	0.929825	2.36926e-08	0.000297433
P08032_SPTA1	E9QNT8_ANK1	0.931889	1.87829e-08	0.000266044
Q3UGX2_SPTB	E9QNT8_ANK1	0.97936	1.55231e-12	5.61514e-07
Q61171_PRDX2	E9QNT8_ANK1	0.880744	1.40604e-06	0.00253446
P20152_VIM	O08553_DPYSL2	0.929825	2.36926e-08	0.000297433
E9Q6R7_UTRN	O08553_DPYSL2	0.852865	6.88698e-06	0.00522979
P24527_LTA4H	O08553_DPYSL2	0.874097	2.12313e-06	0.003049
O35452_TNXB	O08553_DPYSL2	0.879711	1.50135e-06	0.00257952
P07356_ANXA2	O08553_DPYSL2	0.902893	2.92049e-07	0.00117415
Q9DBG3-2_AP2B1	O08553_DPYSL2	0.898865	3.99024e-07	0.00137617
Q5SXR6_CLTC	Q8CIB5_FERMT2	0.824021	2.61992e-05	0.00956106
F8WIV2_SERPINB6A	Q8CIB5_FERMT2	0.843089	1.11545e-05	0.00653735
Q02788_COL6A2	Q8CIB5_FERMT2	0.828589	2.15547e-05	0.0087973
P52480_PKM	Q8K1M6-3_DNM1L	0.873516	2.19861e-06	0.00309791
P58252_EEF2	Q8K1M6-3_DNM1L	0.847107	9.18574e-06	0.00595993
Q8CGC7_EPRS	Q8K1M6-3_DNM1L	0.895145	5.2633e-07	0.0015988
P97443_SMYD1	Q8K1M6-3_DNM1L	0.835744	1.56958e-05	0.00770268
Q11011_NPEPPS	Q8K1M6-3_DNM1L	0.866393	3.32906e-06	0.00381948
P45376_AKR1B1	Q8K1M6-3_DNM1L	0.83626	1.53316e-05	0.00756646
Q3U3J1_BCKDHA	Q8K1M6-3_DNM1L	0.838326	1.39463e-05	0.00724578
P14824_ANXA6	Q8VDM4_PSMD2	0.858842	5.04113e-06	0.00456074
Q8CGC7_EPRS	Q8VDM4_PSMD2	0.889866	7.66378e-07	0.00187723
A0A1B0GSX0_LDHA	Q8VDM4_PSMD2	0.829887	2.03716e-05	0.00859893
Q1XH17_TRIM72	Q8VDM4_PSMD2	0.825142	2.49862e-05	0.0094547
P20152_VIM	A0A0R4J0Z1_PDIA4	0.824561	2.56082e-05	0.0094547
P09103_P4HB	A0A0R4J0Z1_PDIA4	0.890036	7.57373e-07	0.00186192
P57780_ACTN4	A0A0R4J0Z1_PDIA4	0.844605	1.03731e-05	0.00631416
Q9CZ19_MYL4	A0A0R4J0Z1_PDIA4	0.861713	4.31768e-06	0.00423258
P24527_LTA4H	A0A0R4J0Z1_PDIA4	0.927761	2.96792e-08	0.000340944
P58252_EEF2	E9Q1U2_SYNPO2	0.896231	4.85953e-07	0.00151445
P16125_LDHB	Q9QYG0_NDRG2	0.872033	2.40176e-06	0.00323667
Q91VM9_PPA2	Q9QYG0_NDRG2	0.831182	1.9246e-05	0.00842172
P62737_ACTA2	Q9JHW2_NIT2	0.872352	2.35682e-06	0.00323667
Q3UIK0_MYBPC3	Q9JHW2_NIT2	0.876034	1.88747e-06	0.00287861
P07310_CKM	Q9JHW2_NIT2	0.831954	1.86009e-05	0.00827369
P09411_PGK1	Q9JHW2_NIT2	0.867632	3.10267e-06	0.00365437
Q9QXS1_PLEC	Q9Z1E4_GYS1	0.823348	2.69506e-05	0.00974759
Q9WUB3_PYGM	Q9Z1E4_GYS1	0.843573	1.09e-05	0.00652285
Q8CI94_PYGB	Q9Z1E4_GYS1	0.84667	9.38437e-06	0.00601553
F8VPN4_AGL	Q9Z1E4_GYS1	0.880744	1.40604e-06	0.00253446
P47857-3_PFKM	Q9Z1E4_GYS1	0.84858	8.54307e-06	0.00579155
Q11011_NPEPPS	Q9Z1E4_GYS1	0.849901	7.99977e-06	0.0056813
Q8BW75_MAOB	Q9Z1E4_GYS1	0.907121	2.0737e-07	0.000985784
P52825_CPT2	Q9QUR6_PREP	0.846512	9.45728e-06	0.0060498
E9Q7L0_OGDHL	Q9QUR6_PREP	0.844008	1.0675e-05	0.006459
Q9DCM2_GSTK1	Q9QUR6_PREP	0.829029	2.11472e-05	0.00876563
A0A0R4J0S3_RTN4IP1	Q9QUR6_PREP	0.839443	1.32436e-05	0.00713867
Q60597_OGDH	P53395_DBT	0.856995	5.55954e-06	0.00474786
P58281-2_OPA1	P53395_DBT	0.843573	1.09e-05	0.00652285
Q07417_ACADS	P53395_DBT	0.836345	1.52727e-05	0.00754118
Q9JLV1_BAG3	P53395_DBT	0.835312	1.60056e-05	0.00778112
P45376_AKR1B1	P53395_DBT	0.865702	3.46142e-06	0.00383583
Q3ULD5_MCCC2	P53395_DBT	0.840909	1.23664e-05	0.00685276
Q3U3J1_BCKDHA	P53395_DBT	0.889463	7.88079e-07	0.00191711
P26041_MSN	Q3UKW2_CALM1	0.858472	5.14172e-06	0.00462779
Q60597_OGDH	Q9CPY7_LAP3	0.849613	8.1153e-06	0.0056813
Q8BFR5_TUFM	Q9CPY7_LAP3	0.833937	1.70285e-05	0.00797186
Q8QZS1_HIBCH	Q9CPY7_LAP3	0.916797	8.87302e-08	0.000628247
Q8CGK3_LONP1	Q9CPY7_LAP3	0.847546	8.99002e-06	0.0059435
Q8R4N0_CLYBL	Q9CPY7_LAP3	0.884756	1.08341e-06	0.00223022
E9Q035_GM20425	P06684_C5	0.869386	2.80476e-06	0.00346072
A0A0R4J0X5_SERPINA1C	P06684_C5	0.830753	1.96126e-05	0.00842172
Q91X72_HPX	P06684_C5	0.861713	4.31768e-06	0.00423258
Q8K2B3_SDHA	Q8K411_PITRM1	0.860537	4.60241e-06	0.00439454
Q8QZT1_ACAT1	Q8K411_PITRM1	0.898296	4.16551e-07	0.00140667
Q9CQ62_DECR1	Q8K411_PITRM1	0.825323	2.47953e-05	0.00941401
Q9CZ13_UQCRC1	Q8K411_PITRM1	0.87345	2.20726e-06	0.00310868
Q8CC88_VWA8	Q8K411_PITRM1	0.840475	1.26206e-05	0.00691676
Q9Z2I9_SUCLA2	Q8K411_PITRM1	0.832041	1.85294e-05	0.00824401
Q6PB66_LRPPRC	Q8K411_PITRM1	0.852273	7.09812e-06	0.00535587
Q9CR68_UQCRFS1	Q8K411_PITRM1	0.84814	8.73067e-06	0.00588562
Q9D2G2_DLST	Q8K411_PITRM1	0.876033	1.88752e-06	0.00287861
P47934_CRAT	Q8K411_PITRM1	0.831612	1.88851e-05	0.00835923
Q9JHI5_IVD	Q8K411_PITRM1	0.868353	2.977e-06	0.00361447
O55126_NIPSNAP2	Q8K411_PITRM1	0.849174	8.29505e-06	0.0057037
Q99MN9_PCCB	Q8K411_PITRM1	0.883841	1.15069e-06	0.0022673
Q8R4N0_CLYBL	Q8K411_PITRM1	0.874548	2.06605e-06	0.00304692
Q60936_COQ8A	Q8K411_PITRM1	0.84031	1.27184e-05	0.00695637
Q3ULD5_MCCC2	Q8K411_PITRM1	0.850207	7.8782e-06	0.00561721
O35855_BCAT2	Q8K411_PITRM1	0.843573	1.09e-05	0.00652285
Q91VM9_PPA2	Q8K411_PITRM1	0.829545	2.06772e-05	0.00868838
E9Q8Q6_CCDC141	P28271_ACO1	0.826447	2.36365e-05	0.00913928
Q8VDJ3_HDLBP	P28271_ACO1	0.845201	1.0079e-05	0.00622501
Q9DCT2_NDUFS3	A0A0R4J275_NDUFA12	0.83721	1.46807e-05	0.00745234
E9QPE7_MYH11	Q9WVA4_TAGLN2	0.869969	2.7113e-06	0.00341531
Q8BTM8_FLNA	Q9WVA4_TAGLN2	0.973671	1.06924e-11	2.48228e-06
P09103_P4HB	Q9WVA4_TAGLN2	0.859061	4.98269e-06	0.00451538
P57780_ACTN4	Q9WVA4_TAGLN2	0.835312	1.60056e-05	0.00778112
A1BN54_ACTN1	Q9WVA4_TAGLN2	0.942208	5.21468e-09	0.000120779
Q8VCQ8_CALD1	Q9WVA4_TAGLN2	0.950955	1.44258e-09	5.85854e-05
P60710_ACTB	P18760_CFL1	0.9365	1.08793e-08	0.000198614
P27773_PDIA3	P18760_CFL1	0.82438	2.5805e-05	0.00948837
P63101_YWHAZ	P18760_CFL1	0.836345	1.52727e-05	0.00754118
E9Q616_AHNAK	Q9WTQ5_AKAP12	0.956118	6.02298e-10	3.35781e-05
P80314_CCT2	P80313_CCT7	0.864223	3.76011e-06	0.00403015
P80316_CCT5	P80313_CCT7	0.884417	1.10792e-06	0.00223022
P60710_ACTB	P62962_PFN1	0.869386	2.80476e-06	0.00346072
P18760_CFL1	P62962_PFN1	0.86157	4.35145e-06	0.00424481
Q91YT0_NDUFV1	Q9CQJ8_NDUFB9	0.892673	6.29098e-07	0.00171429
Q9Z1P6_NDUFA7	Q9CQJ8_NDUFB9	0.880289	1.44734e-06	0.00253459
P24270_CAT	Q64514_TPP2	0.880559	1.42269e-06	0.00253459
Q99KI0_ACO2	Q9WUM5_SUCLG1	0.865256	3.5494e-06	0.00387726
Q99LC5_ETFA	Q9WUM5_SUCLG1	0.861126	4.458e-06	0.00429063
P12787_COX5A	Q9WUM5_SUCLG1	0.834881	1.63204e-05	0.00778112
P62259_YWHAE	Q3U1J4_DDB1	0.864837	3.63359e-06	0.00395866
E9Q8Q6_CCDC141	Q3U1J4_DDB1	0.903727	2.7331e-07	0.00115551
Q8BL66_EEA1	Q3U1J4_DDB1	0.885552	1.02764e-06	0.00217117
P28271_ACO1	Q3U1J4_DDB1	0.822132	2.83546e-05	0.00991495
O88492_PLIN4	Q8BML9_QARS	0.82602	2.40713e-05	0.00920404
Q8CGC7_EPRS	Q8BML9_QARS	0.833161	1.76297e-05	0.00810038
A0A1B0GSX0_LDHA	Q8BML9_QARS	0.868802	2.90111e-06	0.00355256
Q8K1M6-3_DNM1L	Q8BML9_QARS	0.828512	2.16264e-05	0.0087973
Q8VDM4_PSMD2	Q8BML9_QARS	0.861945	4.26345e-06	0.00423258
E9QLJ0_CMYA5	Q9WVE8_PACSIN2	0.868285	2.98867e-06	0.00362045
Q8K0E8_FGB	E9PV24_FGA	0.990191	4.21885e-15	7.29122e-09
P20918_PLG	E9PV24_FGA	0.870868	2.57254e-06	0.00336563
Q3UER8_FGG	E9PV24_FGA	0.987094	3.71925e-14	3.61563e-08
Q9WUB3_PYGM	Q3UH68_LIMCH1	0.831525	1.89577e-05	0.00838731
E9QQ25_SPEG	Q3UH68_LIMCH1	0.850207	7.87802e-06	0.00561721
Q8VDJ3_HDLBP	Q3UH68_LIMCH1	0.841943	1.17785e-05	0.00674833
E9Q8Q6_CCDC141	P50247_AHCY	0.855372	6.05232e-06	0.00493275
Q8BL66_EEA1	P50247_AHCY	0.886823	9.43707e-07	0.00209168
Q3U1J4_DDB1	P50247_AHCY	0.859361	4.90328e-06	0.00449917
P62737_ACTA2	A2AMM0_CAVIN4	0.828512	2.16264e-05	0.0087973
Q3UIK0_MYBPC3	A2AMM0_CAVIN4	0.92824	2.81839e-08	0.000338778
Q62234_MYOM1	A2AMM0_CAVIN4	0.8508	7.64686e-06	0.0054956
P11404_FABP3	A2AMM0_CAVIN4	0.848735	8.47753e-06	0.00575689
P38647_HSPA9	A2AMM0_CAVIN4	0.872934	2.27651e-06	0.00318144
B7ZCI2_NEBL	A2AMM0_CAVIN4	0.869386	2.80476e-06	0.00346072
D9J302_PDLIM5	A2AMM0_CAVIN4	0.858398	5.16186e-06	0.00464098
Q9JHW2_NIT2	A2AMM0_CAVIN4	0.90646	2.19e-07	0.00101441
P62631_EEF1A2	P51660_HSD17B4	0.860093	4.71408e-06	0.00445278
Q9D0F9_PGM1	P51660_HSD17B4	0.825413	2.47006e-05	0.00938355
F8VQC7_KTN1	Q9D0I9_RARS	0.82189	2.86419e-05	0.00992501
P21981_TGM2	P07901_HSP90AA1	0.826625	2.34566e-05	0.00910461
Q60864_STIP1	P07901_HSP90AA1	0.889463	7.88054e-07	0.00191711
P58281-2_OPA1	Q9WTP6_AK2	0.883841	1.15069e-06	0.0022673
P45376_AKR1B1	Q9WTP6_AK2	0.871901	2.42063e-06	0.00324104
Q8K0D5_GFM1	Q9WTP6_AK2	0.83428	1.67683e-05	0.00786974
Q8K1M6-3_DNM1L	Q9WTP6_AK2	0.901343	3.29834e-07	0.00127082
Q8BMS1_HADHA	Q7TSQ8_PDPR	0.85493	6.1928e-06	0.00498677
Q8K411_PITRM1	Q7TSQ8_PDPR	0.82602	2.40713e-05	0.00920404
E9QPE7_MYH11	Q3UH59_MYH10	0.884874	1.07498e-06	0.00222584
P20152_VIM	Q3UH59_MYH10	0.923077	4.83258e-08	0.000445039
Q5SXR6_CLTC	Q3UH59_MYH10	0.852865	6.88698e-06	0.00522979
P07356_ANXA2	Q3UH59_MYH10	0.821706	2.88618e-05	0.00998363
O35459_ECH1	P32020_SCP2	0.861571	4.35134e-06	0.00424481
D3Z041_ACSL1	P32020_SCP2	0.824561	2.56082e-05	0.0094547
P62631_EEF1A2	P32020_SCP2	0.867905	3.05455e-06	0.00362045
Q61425_HADH	P32020_SCP2	0.826625	2.34566e-05	0.00910461
P52825_CPT2	P32020_SCP2	0.844009	1.06748e-05	0.006459
P58281-2_OPA1	P32020_SCP2	0.890609	7.27747e-07	0.00182928
Q07417_ACADS	P32020_SCP2	0.900929	3.40618e-07	0.00127082
E9Q7L0_OGDHL	P32020_SCP2	0.823955	2.62719e-05	0.00956106
O08528_HK2	P32020_SCP2	0.863191	3.98148e-06	0.00409069
Q9D2G2_DLST	P32020_SCP2	0.891069	7.04682e-07	0.00182928
Q9JHI5_IVD	P32020_SCP2	0.857585	5.38926e-06	0.00468144
Q99MN9_PCCB	P32020_SCP2	0.841073	1.22714e-05	0.00682881
Q9D0F9_PGM1	P32020_SCP2	0.869386	2.80476e-06	0.00346072
P45376_AKR1B1	P32020_SCP2	0.900362	3.55882e-07	0.0012991
Q3ULD5_MCCC2	P32020_SCP2	0.903459	2.79216e-07	0.00116685
P70404_IDH3G	P32020_SCP2	0.859061	4.98269e-06	0.00451538
O35855_BCAT2	P32020_SCP2	0.880289	1.44734e-06	0.00253459
Q3U3J1_BCKDHA	P32020_SCP2	0.905524	2.36439e-07	0.0010747
E9QMK9_DGLUCY	P32020_SCP2	0.829117	2.10662e-05	0.00876563
P51660_HSD17B4	P32020_SCP2	0.918947	7.24635e-08	0.000563276
P09103_P4HB	Q9EQP2_EHD4	0.839443	1.32436e-05	0.00713867
Q8VDN2_ATP1A1	O55111_DSG2	0.828085	2.20301e-05	0.0088575
E9Q035_GM20425	P01029_C4B	0.863191	3.98148e-06	0.00409069
J3QQ13_TNNT2	P01029_C4B	0.830753	1.96126e-05	0.00842172
P01027_C3	P01029_C4B	0.894737	5.42211e-07	0.0015988
Q00623_APOA1	P01029_C4B	0.847703	8.92108e-06	0.0059435
P06728_APOA4	P01029_C4B	0.822497	2.79262e-05	0.00981518
E9Q035_GM20425	Q61646_HP	0.83015	2.01385e-05	0.00851357
P01027_C3	Q61646_HP	0.822497	2.79262e-05	0.00981518
Q91ZJ5_UGP2	Q61646_HP	0.867905	3.05455e-06	0.00362045
Q91X72_HPX	Q61646_HP	0.863777	3.85441e-06	0.00403015
P06684_C5	Q61646_HP	0.847265	9.11495e-06	0.0059435
P01029_C4B	Q61646_HP	0.878225	1.64827e-06	0.00269898
Q8CGC7_EPRS	Q922B2_DARS	0.829194	2.09957e-05	0.00876563
P14733_LMNB1	P10649_GSTM1	0.838243	1.40001e-05	0.00726451
F6ZDS4_TPR	P10649_GSTM1	0.922998	4.87144e-08	0.000446503
Q62234_MYOM1	P70296_PEBP1	0.863191	3.98148e-06	0.00409069
Q8BFR5_TUFM	P70296_PEBP1	0.827907	2.21997e-05	0.00890888
Q8QZS1_HIBCH	P70296_PEBP1	0.869386	2.80476e-06	0.00346072
Q9CPY7_LAP3	P70296_PEBP1	0.888832	8.23097e-07	0.00195059
P48678_LMNA	A0A0R4J0Q5_LMNB2	0.863191	3.98148e-06	0.00409069
F6ZDS4_TPR	A0A0R4J0Q5_LMNB2	0.860021	4.73249e-06	0.00445541
O88569_HNRNPA2B1	A0A0R4J0Q5_LMNB2	0.844882	1.02358e-05	0.00628758
F8WIV2_SERPINB6A	Q8BZF8_PGM5	0.829117	2.10662e-05	0.00876563
P42932_CCT8	Q9D8N0_EEF1G	0.91783	8.05613e-08	0.000608751
P62737_ACTA2	P47757-4_CAPZB	0.933368	1.58318e-08	0.000239778
Q14BI5_MYOM2	P47757-4_CAPZB	0.826446	2.36369e-05	0.00913928
Q3UIK0_MYBPC3	P47757-4_CAPZB	0.882809	1.23095e-06	0.00237815
P17182_ENO1	P47757-4_CAPZB	0.909607	1.68247e-07	0.000897378
P19123_TNNC1	P47757-4_CAPZB	0.894166	5.65121e-07	0.00162628
O70250_PGAM2	P47757-4_CAPZB	0.879711	1.50135e-06	0.00257952
Q8VDN2_ATP1A1	Q9CZW5_TOMM70	0.863636	3.88458e-06	0.00404782
G5E902_SLC25A3	Q9CZW5_TOMM70	0.82584	2.42565e-05	0.00926345
Q08857_CD36	Q9CZW5_TOMM70	0.949923	1.69864e-09	6.18759e-05
Q8JZQ2_AFG3L2	Q9CZW5_TOMM70	0.83428	1.67683e-05	0.00786974
O55111_DSG2	Q9CZW5_TOMM70	0.879711	1.50135e-06	0.00257952
P20152_VIM	E9PWE8_DPYSL3	0.94476	3.66327e-09	9.92672e-05
P57780_ACTN4	E9PWE8_DPYSL3	0.913223	1.22797e-07	0.000750201
E9Q6R7_UTRN	E9PWE8_DPYSL3	0.934917	1.31804e-08	0.000219264
P24527_LTA4H	E9PWE8_DPYSL3	0.874548	2.06605e-06	0.00304692
O35452_TNXB	E9PWE8_DPYSL3	0.920455	6.26604e-08	0.00052428
P07356_ANXA2	E9PWE8_DPYSL3	0.872352	2.35682e-06	0.00323667
Q9DBG3-2_AP2B1	E9PWE8_DPYSL3	0.860093	4.71408e-06	0.00445278
O08553_DPYSL2	E9PWE8_DPYSL3	0.943728	4.23431e-09	0.000106745
A0A0R4J0Z1_PDIA4	E9PWE8_DPYSL3	0.82602	2.40713e-05	0.00920404
Q3UH59_MYH10	E9PWE8_DPYSL3	0.831612	1.88851e-05	0.00835923
Q62234_MYOM1	Q9QYJ0_DNAJA2	0.83841	1.38926e-05	0.00722125
P49813_TMOD1	Q9QYJ0_DNAJA2	0.843573	1.09e-05	0.00652285
P56480_ATP5B	Q9WUR2_ECI2	0.849535	8.14706e-06	0.0056813
Q99JY0_HADHB	Q9WUR2_ECI2	0.871319	2.50523e-06	0.00329744
Q8BWT1_ACAA2	Q9WUR2_ECI2	0.836177	1.53901e-05	0.00758767
Q8K2B3_SDHA	Q9WUR2_ECI2	0.86091	4.51033e-06	0.00433065
Q9CQ62_DECR1	Q9WUR2_ECI2	0.872737	2.30342e-06	0.00321644
Q8CC88_VWA8	Q9WUR2_ECI2	0.900259	3.58689e-07	0.00130577
Q6PB66_LRPPRC	Q9WUR2_ECI2	0.904344	2.60134e-07	0.00110916
P34914_EPHX2	Q9WUR2_ECI2	0.86091	4.51033e-06	0.00433065
Q8CGK3_LONP1	Q9WUR2_ECI2	0.87752	1.72215e-06	0.00276196
Q8R4N0_CLYBL	Q9WUR2_ECI2	0.869252	2.82663e-06	0.00347962
Q9CQN1_TRAP1	Q9WUR2_ECI2	0.825142	2.49862e-05	0.0094547
Q8K411_PITRM1	Q9WUR2_ECI2	0.828335	2.17926e-05	0.00885096
P38647_HSPA9	Q64737_GART	0.870801	2.58262e-06	0.00337739
A2AMM0_CAVIN4	Q64737_GART	0.880103	1.46449e-06	0.0025477
P47757-4_CAPZB	Q64737_GART	0.833592	1.72937e-05	0.00805725
Q9CQN1_TRAP1	Q8K1M3_PRKAR2A	0.863049	4.01265e-06	0.00411348
Q9QVP4_MYL7	Q6ZQ38_CAND1	0.848141	8.73047e-06	0.00588562
Q9CZ19_MYL4	Q6ZQ38_CAND1	0.871901	2.42057e-06	0.00324104
P13020_GSN	Q6ZQ38_CAND1	0.828513	2.1626e-05	0.0087973
Q9CZ13_UQCRC1	Q99KR7_PPIF	0.83015	2.01385e-05	0.00851357
P35486_PDHA1	Q99KR7_PPIF	0.869386	2.80476e-06	0.00346072
Q8JZN5_ACAD9	Q99KR7_PPIF	0.849329	8.23106e-06	0.0056813
Q9CR61_NDUFB7	Q9ERS2_NDUFA13	0.874548	2.06605e-06	0.00304692
F8WIV2_SERPINB6A	P63005_PAFAH1B1	0.838843	1.36172e-05	0.00716672
E9QQ25_SPEG	F6RPJ9_IDE	0.83428	1.67683e-05	0.00786974
Q8VDJ3_HDLBP	F6RPJ9_IDE	0.824987	2.51511e-05	0.0094547
Q8VCT4_CES1D	F6RPJ9_IDE	0.85493	6.1928e-06	0.00498677
P17751_TPI1	Q64433_HSPE1	0.824381	2.58045e-05	0.00948837
Q9D0K2_OXCT1	P55264_ADK	0.907589	1.99451e-07	0.000982055
Q8CC88_VWA8	P55264_ADK	0.822497	2.79262e-05	0.00981518
P58281-2_OPA1	P55264_ADK	0.892673	6.29098e-07	0.00171429
Q07417_ACADS	P55264_ADK	0.857585	5.38926e-06	0.00468144
Q99MN9_PCCB	P55264_ADK	0.847265	9.11495e-06	0.0059435
Q8CGK3_LONP1	P55264_ADK	0.925697	3.69363e-08	0.000385323
P16332_MUT	P55264_ADK	0.860093	4.71408e-06	0.00445278
Q9WTP6_AK2	P55264_ADK	0.833247	1.7562e-05	0.00810038
E9Q9C1_ABLIM1	Q8BVQ9_PSMC2	0.823864	2.63727e-05	0.00959462
Q61941_NNT	Q6PIE5_ATP1A2	0.890609	7.27747e-07	0.00182928
G5E902_SLC25A3	Q6PIE5_ATP1A2	0.897728	4.3475e-07	0.00145743
Q08857_CD36	Q6PIE5_ATP1A2	0.878225	1.64827e-06	0.00269898
Q8JZQ2_AFG3L2	Q6PIE5_ATP1A2	0.876161	1.87278e-06	0.0028702
Q9CZW5_TOMM70	Q6PIE5_ATP1A2	0.908622	1.82914e-07	0.000919553
P27773_PDIA3	P14211_CALR	0.845041	1.01572e-05	0.00624874
P08113_HSP90B1	P14211_CALR	0.833247	1.7562e-05	0.00810038
Q99JY9_ACTR3	P14211_CALR	0.839443	1.32436e-05	0.00713867
Q99JY0_HADHB	Q922B1_MACROD1	0.857585	5.38926e-06	0.00468144
Q8BMS1_HADHA	Q922B1_MACROD1	0.929272	2.51816e-08	0.000308168
Q8BWT1_ACAA2	Q922B1_MACROD1	0.855521	6.00563e-06	0.00491959
P50544_ACADVL	Q922B1_MACROD1	0.899329	3.85186e-07	0.00137617
P97807_FH	Q922B1_MACROD1	0.882353	1.26787e-06	0.00237858
E9Q800_IMMT	Q922B1_MACROD1	0.934435	1.39613e-08	0.00022931
Q8K2B3_SDHA	Q922B1_MACROD1	0.824987	2.51511e-05	0.0094547
Q8QZT1_ACAT1	Q922B1_MACROD1	0.917441	8.3558e-08	0.000608751
Q9CQ62_DECR1	Q922B1_MACROD1	0.890496	7.33489e-07	0.00183517
P45952_ACADM	Q922B1_MACROD1	0.87371	2.17312e-06	0.00309791
Q9CZ13_UQCRC1	Q922B1_MACROD1	0.877646	1.70878e-06	0.00274659
Q6PB66_LRPPRC	Q922B1_MACROD1	0.851833	7.2584e-06	0.00541924
Q8BH95_ECHS1	Q922B1_MACROD1	0.870418	2.64116e-06	0.00341531
Q99NB1_ACSS1	Q922B1_MACROD1	0.859061	4.98269e-06	0.00451538
Q2TPA8_HSDL2	Q922B1_MACROD1	0.823955	2.62719e-05	0.00956106
P47934_CRAT	Q922B1_MACROD1	0.912752	1.2804e-07	0.00076599
O55126_NIPSNAP2	Q922B1_MACROD1	0.882809	1.23095e-06	0.00237815
P47738_ALDH2	Q922B1_MACROD1	0.884874	1.07498e-06	0.00222584
E9QQ25_SPEG	Q922B1_MACROD1	0.861713	4.31768e-06	0.00423258
Q91VM9_PPA2	Q922B1_MACROD1	0.873516	2.19861e-06	0.00309791
Q8K411_PITRM1	Q922B1_MACROD1	0.83428	1.67683e-05	0.00786974
Q9WUR2_ECI2	Q922B1_MACROD1	0.840311	1.27179e-05	0.00695637
Q62234_MYOM1	Q5EBG6_HSPB6	0.853457	6.68154e-06	0.00516327
B7ZCI2_NEBL	Q5EBG6_HSPB6	0.863777	3.85441e-06	0.00403015
J3QQ13_TNNT2	Q5EBG6_HSPB6	0.93808	8.93749e-09	0.000172476
P05201_GOT1	Q5EBG6_HSPB6	0.829117	2.10662e-05	0.00876563
Q9JJW5_MYOZ2	Q5EBG6_HSPB6	0.881776	1.31599e-06	0.00242153
Q8K0D5_GFM1	Q5EBG6_HSPB6	0.822497	2.79262e-05	0.00981518
P49813_TMOD1	Q5EBG6_HSPB6	0.876161	1.87278e-06	0.0028702
Q61646_HP	Q5EBG6_HSPB6	0.849329	8.23106e-06	0.0056813
Q99JY0_HADHB	A2AUC9_KLHL41	0.830579	1.97634e-05	0.00845208
Q8BWT1_ACAA2	A2AUC9_KLHL41	0.828513	2.1626e-05	0.0087973
P50544_ACADVL	A2AUC9_KLHL41	0.85478	6.2411e-06	0.00501735
E9Q800_IMMT	A2AUC9_KLHL41	0.838243	1.40001e-05	0.00726451
P52480_PKM	A2AUC9_KLHL41	0.838843	1.36169e-05	0.00716672
Q8CI94_PYGB	A2AUC9_KLHL41	0.823773	2.64738e-05	0.00961877
Q6PB66_LRPPRC	A2AUC9_KLHL41	0.833075	1.76975e-05	0.00810038
P52825_CPT2	A2AUC9_KLHL41	0.860393	4.63842e-06	0.00442512
P47857-3_PFKM	A2AUC9_KLHL41	0.83911	1.34495e-05	0.00714022
Q07417_ACADS	A2AUC9_KLHL41	0.85124	7.47927e-06	0.00544089
Q99MN9_PCCB	A2AUC9_KLHL41	0.841943	1.17785e-05	0.00674833
Q76MZ3_PPP2R1A	A2AUC9_KLHL41	0.858398	5.16186e-06	0.00464098
P28271_ACO1	O88544_COPS4	0.83015	2.01385e-05	0.00851357
A8DUK4_HBB-BS	P04919_SLC4A1	0.865841	3.43451e-06	0.0038229
P08032_SPTA1	P04919_SLC4A1	0.849329	8.23106e-06	0.0056813
Q3UGX2_SPTB	P04919_SLC4A1	0.93808	8.93749e-09	0.000172476
E9QNT8_ANK1	P04919_SLC4A1	0.96904	3.85141e-11	5.49594e-06
Q8QZS1_HIBCH	P85094_ISOC2A	0.865703	3.46133e-06	0.00383583
Q9D172_D10JHU81E	P85094_ISOC2A	0.830579	1.97634e-05	0.00845208
Q9CPY7_LAP3	P85094_ISOC2A	0.856182	5.80196e-06	0.0049121
P63038_HSPD1	Q3UIJ9_MYZAP	0.830062	2.02161e-05	0.00854356
E9Q8T1_TACC2	Q3UIJ9_MYZAP	0.82602	2.40713e-05	0.00920404
Q9CQN1_TRAP1	Q3UIJ9_MYZAP	0.845478	9.94475e-06	0.00622501
Q9CPV4_GLOD4	Q3UIJ9_MYZAP	0.847624	8.95573e-06	0.0059435
P26041_MSN	Q99LF4_RTCB	0.909185	1.74407e-07	0.000897378
A0A1D5RM59_TNS1	Q99LF4_RTCB	0.861126	4.458e-06	0.00429063
P26043_RDX	Q99LF4_RTCB	0.855963	5.86885e-06	0.00491708
Q61292_LAMB2	P61979-2_HNRNPK	0.835744	1.56958e-05	0.00770268
Q02566_MYH6	Q9CQ75_NDUFA2	0.860538	4.6023e-06	0.00439454
Q3TXS7_PSMD1	Q9D8W5_PSMD12	0.872285	2.36609e-06	0.00323667
F6RPJ9_IDE	Q922D8_MTHFD1	0.837377	1.45686e-05	0.00745234
P80316_CCT5	Q61035_HARS	0.847265	9.11495e-06	0.0059435
Q64727_VCL	P24369_PPIB	0.847265	9.11495e-06	0.0059435
P26041_MSN	P24369_PPIB	0.839009	1.35127e-05	0.00714022
A1BN54_ACTN1	P24369_PPIB	0.822497	2.79262e-05	0.00981518
Q3UKW2_CALM1	P24369_PPIB	0.82748	2.26122e-05	0.00903705
Q78PY7_SND1	P24369_PPIB	0.823955	2.62719e-05	0.00956106
Q61941_NNT	Q9CPQ1_COX6C	0.854339	6.38508e-06	0.00510551
P14733_LMNB1	Q62165_DAG1	0.869251	2.82678e-06	0.00347962
P70670_NACA	Q78IK4_APOOL	0.869969	2.7113e-06	0.00341531
J3QMG3_VDAC3	Q78IK4_APOOL	0.841073	1.22714e-05	0.00682881
Q9DCM2_GSTK1	Q78IK4_APOOL	0.899329	3.85186e-07	0.00137617
A0A0R4J0S3_RTN4IP1	Q78IK4_APOOL	0.834881	1.63204e-05	0.00778112
A0A0R4J0Z1_PDIA4	Q9DCD0_PGD	0.82189	2.86419e-05	0.00992501
E9Q035_GM20425	E9PVD2_ITIH4	0.912752	1.2804e-07	0.00076599
P01027_C3	E9PVD2_ITIH4	0.884417	1.10792e-06	0.00223022
A0A087WSN6_FN1	E9PVD2_ITIH4	0.878678	1.60217e-06	0.00269704
Q91X72_HPX	E9PVD2_ITIH4	0.896801	4.65886e-07	0.00148646
P06684_C5	E9PVD2_ITIH4	0.872033	2.40176e-06	0.00323667
P01029_C4B	E9PVD2_ITIH4	0.913313	1.21822e-07	0.000748656
Q61646_HP	E9PVD2_ITIH4	0.915377	1.01133e-07	0.000676287
Q07417_ACADS	Q8K010_OPLAH	0.828689	2.14612e-05	0.00876563
P14733_LMNB1	Q8BTS0_DDX5	0.930785	2.12845e-08	0.000287882
F6ZDS4_TPR	Q8BTS0_DDX5	0.866736	3.26514e-06	0.00376924
Q62165_DAG1	Q8BTS0_DDX5	0.865633	3.47494e-06	0.00384999
Q9QUR6_PREP	Q9Z1Q9_VARS	0.825413	2.47006e-05	0.00938355
Q8VDD5_MYH9	Q6IRU2_TPM4	0.891069	7.04682e-07	0.00182928
P26039_TLN1	Q6IRU2_TPM4	0.891069	7.04682e-07	0.00182928
Q03265_ATP5A1	Q99JR6_NMNAT3	0.876486	1.83578e-06	0.0028702
P56480_ATP5B	Q99JR6_NMNAT3	0.860982	4.49286e-06	0.00431591
Q8BMS1_HADHA	Q99JR6_NMNAT3	0.866667	3.2779e-06	0.00378201
P97807_FH	Q99JR6_NMNAT3	0.850207	7.87802e-06	0.00561721
Q8K2B3_SDHA	Q99JR6_NMNAT3	0.899742	3.73231e-07	0.00135133
Q9CZ13_UQCRC1	Q99JR6_NMNAT3	0.828424	2.17094e-05	0.008826
Q7TSQ8_PDPR	Q99JR6_NMNAT3	0.826447	2.36365e-05	0.00913928
A0A1B0GS91_SVIL	E9Q3X0_MVP	0.827052	2.30314e-05	0.00910461
Q8BL66_EEA1	E9Q3X0_MVP	0.830921	1.94688e-05	0.00842172
P50396_GDI1	E9Q3X0_MVP	0.864669	3.66776e-06	0.003975
Q99JY0_HADHB	Q9DBG5_PLIN3	0.832215	1.83875e-05	0.00819496
Q8CC88_VWA8	Q9DBG5_PLIN3	0.836345	1.52727e-05	0.00754118
Q9CR68_UQCRFS1	Q9DBG5_PLIN3	0.829029	2.11472e-05	0.00876563
Q07417_ACADS	Q9DBG5_PLIN3	0.860093	4.71408e-06	0.00445278
P26443_GLUD1	Q9DBG5_PLIN3	0.856921	5.58123e-06	0.0047636
Q99MN9_PCCB	Q9DBG5_PLIN3	0.867321	3.15826e-06	0.0036745
Q8CGK3_LONP1	Q9DBG5_PLIN3	0.874548	2.06605e-06	0.00304692
Q60936_COQ8A	Q9DBG5_PLIN3	0.909561	1.68917e-07	0.000897378
P55264_ADK	Q9DBG5_PLIN3	0.844605	1.03731e-05	0.00631416
Q9CQQ7_ATP5F1	O08532_CACNA2D1	0.871451	2.48583e-06	0.00327866
Q8BW75_MAOB	O08532_CACNA2D1	0.845201	1.0079e-05	0.00622501
Q78IK4_APOOL	O08532_CACNA2D1	0.826625	2.34566e-05	0.00910461
Q9Z1Q9_VARS	O08532_CACNA2D1	0.823955	2.62719e-05	0.00956106
P70670_NACA	P40630_TFAM	0.836945	1.48599e-05	0.00745234
Q61768_KIF5B	P51125_CAST	0.888314	8.52816e-07	0.00196721
A0A1L1SQ51_TLN2	Q99PT1_ARHGDIA	0.830753	1.96126e-05	0.00842172
P63101_YWHAZ	Q99PT1_ARHGDIA	0.882353	1.26787e-06	0.00237858
Q63918_CAVIN2	Q99PT1_ARHGDIA	0.900929	3.40618e-07	0.00127082
Q9Z1P6_NDUFA7	Q9DCJ5_NDUFA8	0.913313	1.21822e-07	0.000748656
Q08857_CD36	Q9WTR5_CDH13	0.830753	1.96126e-05	0.00842172
E9Q8Q6_CCDC141	B9EHJ3_TJP1	0.918863	7.30451e-08	0.0005661
Q6PB66_LRPPRC	Q921H8_ACAA1A	0.833247	1.7562e-05	0.00810038
Q99NB1_ACSS1	Q921H8_ACAA1A	0.83428	1.67683e-05	0.00786974
P60710_ACTB	P68510_YWHAH	0.859061	4.98269e-06	0.00451538
P18760_CFL1	P68510_YWHAH	0.936983	1.02497e-08	0.000189793
P50544_ACADVL	Q8R164_BPHL	0.822922	2.74351e-05	0.00981518
E9Q800_IMMT	Q8R164_BPHL	0.884874	1.07498e-06	0.00222584
Q921G7_ETFDH	Q8R164_BPHL	0.823348	2.69506e-05	0.00974759
Q8QZT1_ACAT1	Q8R164_BPHL	0.944272	3.924e-09	0.0001012
Q9CZ13_UQCRC1	Q8R164_BPHL	0.909654	1.67577e-07	0.000896334
P52825_CPT2	Q8R164_BPHL	0.842976	1.1215e-05	0.00654726
Q91ZA3_PCCA	Q8R164_BPHL	0.874097	2.12313e-06	0.003049
Q9CR68_UQCRFS1	Q8R164_BPHL	0.905524	2.36439e-07	0.0010747
Q99MR8_MCCC1	Q8R164_BPHL	0.886481	9.65677e-07	0.00209168
Q07417_ACADS	Q8R164_BPHL	0.826625	2.34566e-05	0.00910461
Q9D2G2_DLST	Q8R164_BPHL	0.883841	1.15069e-06	0.0022673
P47934_CRAT	Q8R164_BPHL	0.861126	4.458e-06	0.00429063
Q9JHI5_IVD	Q8R164_BPHL	0.915377	1.01133e-07	0.000676287
O55126_NIPSNAP2	Q8R164_BPHL	0.943728	4.23431e-09	0.000106745
Q99MN9_PCCB	Q8R164_BPHL	0.880289	1.44734e-06	0.00253459
Q8CHT0_ALDH4A1	Q8R164_BPHL	0.824561	2.56082e-05	0.0094547
P16332_MUT	Q8R164_BPHL	0.84254	1.14497e-05	0.00660456
Q60936_COQ8A	Q8R164_BPHL	0.82748	2.26122e-05	0.00903705
Q8BMF3_ME3	Q8R164_BPHL	0.836345	1.52727e-05	0.00754118
Q3ULD5_MCCC2	Q8R164_BPHL	0.916882	8.80323e-08	0.000624955
O35855_BCAT2	Q8R164_BPHL	0.898865	3.99024e-07	0.00137617
Q91VM9_PPA2	Q8R164_BPHL	0.829117	2.10662e-05	0.00876563
Q8K411_PITRM1	Q8R164_BPHL	0.894166	5.65121e-07	0.00162628
Q922B1_MACROD1	Q8R164_BPHL	0.890609	7.27747e-07	0.00182928
P70296_PEBP1	A0A1B0GSG5_RNH1	0.858842	5.04113e-06	0.00456074
P58281-2_OPA1	Q924M7_MPI	0.867905	3.05455e-06	0.00362045
Q91VA7_IDH3B	Q924M7_MPI	0.887397	9.07764e-07	0.00204757
Q07417_ACADS	Q924M7_MPI	0.890609	7.27747e-07	0.00182928
P45376_AKR1B1	Q924M7_MPI	0.892101	6.55184e-07	0.00174055
P70404_IDH3G	Q924M7_MPI	0.855963	5.86885e-06	0.00491708
Q3U3J1_BCKDHA	Q924M7_MPI	0.862158	4.21396e-06	0.00423258
P32020_SCP2	Q924M7_MPI	0.884417	1.10792e-06	0.00223022
E9QPE7_MYH11	Q9DBR7_PPP1R12A	0.933953	1.47815e-08	0.000230145
Q8BTM8_FLNA	Q9DBR7_PPP1R12A	0.822922	2.74351e-05	0.00981518
P57780_ACTN4	Q9DBR7_PPP1R12A	0.873516	2.19861e-06	0.00309791
A1BN54_ACTN1	Q9DBR7_PPP1R12A	0.876161	1.87278e-06	0.0028702
F8WIV2_SERPINB6A	Q9DBR7_PPP1R12A	0.829117	2.10662e-05	0.00876563
Q8VCQ8_CALD1	Q9DBR7_PPP1R12A	0.962313	1.81783e-10	1.45748e-05
Q9WVA4_TAGLN2	Q9DBR7_PPP1R12A	0.909185	1.74407e-07	0.000897378
Q3UH59_MYH10	Q9DBR7_PPP1R12A	0.82189	2.86419e-05	0.00992501
Q99PT1_ARHGDIA	Q9DBR7_PPP1R12A	0.832817	1.79019e-05	0.00810038
E9Q035_GM20425	B8JJN0_GM20547	0.836777	1.49747e-05	0.00747811
Q00623_APOA1	B8JJN0_GM20547	0.885331	1.04287e-06	0.00219293
A0A087WSN6_FN1	B8JJN0_GM20547	0.870868	2.57254e-06	0.00336563
P06728_APOA4	B8JJN0_GM20547	0.844605	1.03731e-05	0.00631416
E9Q414_APOB	B8JJN0_GM20547	0.828512	2.16264e-05	0.0087973
P21614_GC	B8JJN0_GM20547	0.889979	7.60374e-07	0.00186753
P01029_C4B	B8JJN0_GM20547	0.883841	1.15069e-06	0.0022673
E9PVD2_ITIH4	B8JJN0_GM20547	0.848735	8.47753e-06	0.00575689
A8DUK4_HBB-BS	P00920_CA2	0.97936	1.55231e-12	5.61514e-07
P08032_SPTA1	P00920_CA2	0.966976	6.41244e-11	8.17538e-06
Q91VB8_HBA-A1	P00920_CA2	0.923633	4.56846e-08	0.000432495
Q3UGX2_SPTB	P00920_CA2	0.954592	7.87842e-10	3.9593e-05
Q61171_PRDX2	P00920_CA2	0.877646	1.70878e-06	0.00274659
E9QNT8_ANK1	P00920_CA2	0.902993	2.89752e-07	0.00117336
P04919_SLC4A1	P00920_CA2	0.832817	1.79019e-05	0.00810038
Q08857_CD36	Q9EQH3_VPS35	0.82748	2.26122e-05	0.00903705
Q8JZQ2_AFG3L2	Q9EQH3_VPS35	0.844009	1.06748e-05	0.006459
A3KGU9_SPTAN1	O88322_NID2	0.832817	1.79019e-05	0.00810038
P48678_LMNA	O88322_NID2	0.824561	2.56082e-05	0.0094547
P57780_ACTN4	O88322_NID2	0.832215	1.83875e-05	0.00819496
P63101_YWHAZ	O88322_NID2	0.828689	2.14612e-05	0.00876563
P97927_LAMA4	O88322_NID2	0.911249	1.46078e-07	0.000822643
Q99PT1_ARHGDIA	O88322_NID2	0.853457	6.68154e-06	0.00516327
Q9DBR7_PPP1R12A	O88322_NID2	0.847265	9.11495e-06	0.0059435
E9QPE7_MYH11	P37804_TAGLN	0.927761	2.96792e-08	0.000340944
Q8VCQ8_CALD1	P37804_TAGLN	0.823955	2.62719e-05	0.00956106
Q8CIB5_FERMT2	P37804_TAGLN	0.907872	1.948e-07	0.00097239
Q3UH59_MYH10	P37804_TAGLN	0.856995	5.55954e-06	0.00474786
Q9DBR7_PPP1R12A	P37804_TAGLN	0.872033	2.40176e-06	0.00323667
E9Q9C1_ABLIM1	Q9DC61_PMPCA	0.831182	1.9246e-05	0.00842172
A6H644_PPP1R12B	Q9DC61_PMPCA	0.831182	1.9246e-05	0.00842172
Q9CPY7_LAP3	Q9DC61_PMPCA	0.876487	1.83568e-06	0.0028702
P85094_ISOC2A	Q9DC61_PMPCA	0.830579	1.97634e-05	0.00845208
Q8BFP9_PDK1	Q9DC61_PMPCA	0.884298	1.11664e-06	0.00223713
O35857_TIMM44	Q9DC61_PMPCA	0.841508	1.2023e-05	0.00682881
A0A1B0GSG5_RNH1	Q9DC61_PMPCA	0.821706	2.88608e-05	0.00998363
Q8VDN2_ATP1A1	P14094_ATP1B1	0.901394	3.28525e-07	0.00127019
O55111_DSG2	P14094_ATP1B1	0.857585	5.38926e-06	0.00468144
Q9CZW5_TOMM70	P14094_ATP1B1	0.862158	4.21396e-06	0.00423258
Q9QVP4_MYL7	Q9CZS1_ALDH1B1	0.950464	1.55976e-09	5.88859e-05
Q9CZ19_MYL4	Q9CZS1_ALDH1B1	0.936017	1.15419e-08	0.000199695
A0A0R4J0Z1_PDIA4	Q9CZS1_ALDH1B1	0.851393	7.42169e-06	0.00542195
P52480_PKM	Q8BG32_PSMD11	0.846951	9.25633e-06	0.00599601
P47857-3_PFKM	Q8BG32_PSMD11	0.837908	1.42179e-05	0.00737188
Q8CGC7_EPRS	Q8BG32_PSMD11	0.859804	4.78787e-06	0.00445541
Q8VDM4_PSMD2	Q8BG32_PSMD11	0.865873	3.42839e-06	0.0038229
Q3U4W8_USP5	Q8BG32_PSMD11	0.82487	2.52757e-05	0.0094547
Q922B2_DARS	Q8BG32_PSMD11	0.86055	4.59932e-06	0.00439454
P48758_CBR1	Q8BG32_PSMD11	0.830052	2.02251e-05	0.00854713
Q02053_UBA1	P97371_PSME1	0.826625	2.34566e-05	0.00910461
Q3B7Z2_OSBP	P97371_PSME1	0.867905	3.05455e-06	0.00362045
P14733_LMNB1	E9QNN1_DHX9	0.87907	1.56329e-06	0.0026595
Q9WTR5_CDH13	E9QNN1_DHX9	0.831612	1.88847e-05	0.00835923
A0A075B5P2_IGKC	A0A075B5P6_IGHM	0.823955	2.62719e-05	0.00956106
Q9WTP7_AK3	Q8K1R3_PNPT1	0.861126	4.458e-06	0.00429063
O08788_DCTN1	Q8R5C5_ACTR1B	0.851603	7.34341e-06	0.00542195
Q8QZS1_HIBCH	Q9DCL9_PAICS	0.856405	5.73454e-06	0.00485964
Q9CPY7_LAP3	Q9DCL9_PAICS	0.830833	1.95441e-05	0.00842172
P85094_ISOC2A	Q9DCL9_PAICS	0.883144	1.20438e-06	0.00235136
O35857_TIMM44	Q9DCL9_PAICS	0.847029	9.22132e-06	0.00597927
Q9DC61_PMPCA	Q9DCL9_PAICS	0.848141	8.73047e-06	0.00588562
P28271_ACO1	Q8VBT1_TXLNB	0.830753	1.96126e-05	0.00842172
Q8R5C5_ACTR1B	Q8VBT1_TXLNB	0.829546	2.06768e-05	0.00868838
E9Q8Q6_CCDC141	A0A0G2JGS4_CAMK2D	0.834023	1.69631e-05	0.0079446
F6RPJ9_IDE	A0A0G2JGS4_CAMK2D	0.84031	1.27184e-05	0.00695637
Q9WUB3_PYGM	G3X914_CUL5	0.922998	4.87144e-08	0.000446503
P52480_PKM	G3X914_CUL5	0.869835	2.73251e-06	0.00342437
Q8CI94_PYGB	G3X914_CUL5	0.845478	9.94475e-06	0.00622501
P47857-3_PFKM	G3X914_CUL5	0.926539	3.38068e-08	0.000374529
Q8VDJ3_HDLBP	G3X914_CUL5	0.870868	2.57247e-06	0.00336563
Q9Z1E4_GYS1	G3X914_CUL5	0.830579	1.97634e-05	0.00845208
Q8BG32_PSMD11	G3X914_CUL5	0.825052	2.50819e-05	0.0094547
Q8BMS1_HADHA	Q9DCZ4-3_APOO	0.843411	1.09846e-05	0.00652285
E9Q800_IMMT	Q9DCZ4-3_APOO	0.860982	4.49286e-06	0.00431591
Q921G7_ETFDH	Q9DCZ4-3_APOO	0.82213	2.83567e-05	0.00991495
Q8QZT1_ACAT1	Q9DCZ4-3_APOO	0.919422	6.92406e-08	0.00054811
P45952_ACADM	Q9DCZ4-3_APOO	0.823836	2.64035e-05	0.00960557
Q9CZ13_UQCRC1	Q9DCZ4-3_APOO	0.852713	6.94064e-06	0.00526104
A2AKU9_ATP5C1	Q9DCZ4-3_APOO	0.8677	3.09054e-06	0.0036434
Q6PB66_LRPPRC	Q9DCZ4-3_APOO	0.835142	1.61292e-05	0.00778112
Q9CQQ7_ATP5F1	Q9DCZ4-3_APOO	0.822739	2.76458e-05	0.00981518
P52825_CPT2	Q9DCZ4-3_APOO	0.850569	7.73638e-06	0.00554763
Q99NB1_ACSS1	Q9DCZ4-3_APOO	0.918346	7.67235e-08	0.000590488
Q9CR68_UQCRFS1	Q9DCZ4-3_APOO	0.855297	6.07599e-06	0.00494959
Q2TPA8_HSDL2	Q9DCZ4-3_APOO	0.84031	1.27184e-05	0.00695637
Q9D2G2_DLST	Q9DCZ4-3_APOO	0.839277	1.33461e-05	0.00714022
P47934_CRAT	Q9DCZ4-3_APOO	0.911628	1.41331e-07	0.000822643
Q9JHI5_IVD	Q9DCZ4-3_APOO	0.867769	3.07842e-06	0.00363169
O55126_NIPSNAP2	Q9DCZ4-3_APOO	0.885271	1.04698e-06	0.00219741
Q9Z2Z6_SLC25A20	Q9DCZ4-3_APOO	0.887855	8.79941e-07	0.00199429
Q9DCM2_GSTK1	Q9DCZ4-3_APOO	0.822739	2.76458e-05	0.00981518
O35855_BCAT2	Q9DCZ4-3_APOO	0.866736	3.26505e-06	0.00376924
Q91VM9_PPA2	Q9DCZ4-3_APOO	0.858915	5.02162e-06	0.00454378
Q8K411_PITRM1	Q9DCZ4-3_APOO	0.863049	4.01265e-06	0.00411348
Q922B1_MACROD1	Q9DCZ4-3_APOO	0.897728	4.3475e-07	0.00145743
Q921H8_ACAA1A	Q9DCZ4-3_APOO	0.85124	7.47927e-06	0.00544089
Q8R164_BPHL	Q9DCZ4-3_APOO	0.883265	1.1949e-06	0.00233555
Q8CHT0_ALDH4A1	Q9CQZ5_NDUFA6	0.839009	1.35127e-05	0.00714022
Q9D0F9_PGM1	Q9CQZ5_NDUFA6	0.845638	9.86813e-06	0.00621674
Q9Z1P6_NDUFA7	Q9CQZ5_NDUFA6	0.907121	2.0737e-07	0.000985784
Q3ULD5_MCCC2	Q9CQZ5_NDUFA6	0.840475	1.26206e-05	0.00691676
P70404_IDH3G	Q9CQZ5_NDUFA6	0.851833	7.2584e-06	0.00541924
Q3U3J1_BCKDHA	Q9CQZ5_NDUFA6	0.904492	2.5706e-07	0.00109906
E9QPX3_NDUFS4	Q9CQZ5_NDUFA6	0.889463	7.88054e-07	0.00191711
P32020_SCP2	Q9CQZ5_NDUFA6	0.847265	9.11495e-06	0.0059435
Q9DCJ5_NDUFA8	Q9CQZ5_NDUFA6	0.826625	2.34566e-05	0.00910461
E9Q035_GM20425	Q06890_CLU	0.865633	3.47494e-06	0.00384999
A0A0R4J0X5_SERPINA1C	Q06890_CLU	0.904959	2.47537e-07	0.00108127
G3X8Q5_CP	Q06890_CLU	0.831612	1.88847e-05	0.00835923
P06684_C5	Q06890_CLU	0.868802	2.90103e-06	0.00355256
Q62234_MYOM1	Q9CQM9_GLRX3	0.832215	1.83875e-05	0.00819496
J3QQ13_TNNT2	Q9CQM9_GLRX3	0.864223	3.76011e-06	0.00403015
P58281-2_OPA1	Q9CQM9_GLRX3	0.82602	2.40713e-05	0.00920404
Q91VA7_IDH3B	Q9CQM9_GLRX3	0.934367	1.40741e-08	0.000230145
Q8CGC7_EPRS	Q9CQM9_GLRX3	0.824897	2.52477e-05	0.0094547
O08528_HK2	Q9CQM9_GLRX3	0.826963	2.31199e-05	0.00910461
P97443_SMYD1	Q9CQM9_GLRX3	0.825413	2.47006e-05	0.00938355
P45376_AKR1B1	Q9CQM9_GLRX3	0.894628	5.46515e-07	0.00160117
Q8K0D5_GFM1	Q9CQM9_GLRX3	0.856995	5.55954e-06	0.00474786
P16045_LGALS1	Q9CQM9_GLRX3	0.860093	4.71408e-06	0.00445278
P49813_TMOD1	Q9CQM9_GLRX3	0.84254	1.14497e-05	0.00660456
Q3U3J1_BCKDHA	Q9CQM9_GLRX3	0.862087	4.23043e-06	0.00423258
Q8K1M6-3_DNM1L	Q9CQM9_GLRX3	0.879649	1.50727e-06	0.00258854
Q924M7_MPI	Q9CQM9_GLRX3	0.875581	1.94043e-06	0.00291782
Q9WUB3_PYGM	P61202_COPS2	0.868353	2.977e-06	0.00361447
P47857-3_PFKM	P61202_COPS2	0.841345	1.21156e-05	0.00682881
Q8VDJ3_HDLBP	P61202_COPS2	0.898865	3.99024e-07	0.00137617
Q8BG32_PSMD11	P61202_COPS2	0.838678	1.37215e-05	0.00721075
G3X914_CUL5	P61202_COPS2	0.896695	4.69571e-07	0.00149124
Q5SXR6_CLTC	P09055-2_ITGB1	0.823955	2.62719e-05	0.00956106
Q08857_CD36	P09055-2_ITGB1	0.921012	5.93387e-08	0.000501886
Q9CZW5_TOMM70	P09055-2_ITGB1	0.920455	6.26604e-08	0.00052428
Q6PIE5_ATP1A2	P09055-2_ITGB1	0.902427	3.03005e-07	0.0011968
Q9WTR5_CDH13	P09055-2_ITGB1	0.914817	1.06418e-07	0.000696072
E9PWQ3_COL6A3	Q62009_POSTN	0.865841	3.43451e-06	0.0038229
E9QPE7_MYH11	Q62009_POSTN	0.863777	3.85441e-06	0.00403015
P20152_VIM	Q62009_POSTN	0.905057	2.45589e-07	0.00107817
Q5SXR6_CLTC	Q62009_POSTN	0.841073	1.22714e-05	0.00682881
Q04857_COL6A1	Q62009_POSTN	0.880744	1.40604e-06	0.00253446
P57780_ACTN4	Q62009_POSTN	0.823955	2.62719e-05	0.00956106
P24527_LTA4H	Q62009_POSTN	0.861713	4.31768e-06	0.00423258
Q02788_COL6A2	Q62009_POSTN	0.923077	4.83258e-08	0.000445039
O35452_TNXB	Q62009_POSTN	0.828085	2.20301e-05	0.0088575
P07356_ANXA2	Q62009_POSTN	0.871901	2.42057e-06	0.00324104
Q8CIB5_FERMT2	Q62009_POSTN	0.865429	3.51512e-06	0.00387726
A0A0R4J0Z1_PDIA4	Q62009_POSTN	0.822497	2.79262e-05	0.00981518
Q3UKW2_CALM1	Q62009_POSTN	0.823348	2.69506e-05	0.00974759
Q3UH59_MYH10	Q62009_POSTN	0.866288	3.34893e-06	0.00381948
E9PWE8_DPYSL3	Q62009_POSTN	0.83428	1.67683e-05	0.00786974
P37804_TAGLN	Q62009_POSTN	0.845201	1.0079e-05	0.00622501
Q8BFR5_TUFM	Q99J39_MLYCD	0.839027	1.35013e-05	0.00714022
Q8QZS1_HIBCH	Q99J39_MLYCD	0.881077	1.37636e-06	0.00251124
P20108_PRDX3	Q99J39_MLYCD	0.842815	1.13013e-05	0.00658891
Q60932_VDAC1	Q8K009_ALDH1L2	0.844445	1.04536e-05	0.00635074
P47738_ALDH2	Q8K009_ALDH1L2	0.874483	2.07418e-06	0.003049
E9QQ25_SPEG	Q8K009_ALDH1L2	0.862158	4.21396e-06	0.00423258
F6RPJ9_IDE	Q8K009_ALDH1L2	0.913223	1.22797e-07	0.000750201
Q60597_OGDH	O09131_GSTO1	0.85493	6.1928e-06	0.00498677
Q9R0Y5-2_AK1	O09131_GSTO1	0.841861	1.18243e-05	0.00677216
Q8BFR5_TUFM	O09131_GSTO1	0.928165	2.8411e-08	0.000340719
Q8QZS1_HIBCH	O09131_GSTO1	0.945793	3.16038e-09	8.85718e-05
Q8CGK3_LONP1	O09131_GSTO1	0.832215	1.83875e-05	0.00819496
Q8R4N0_CLYBL	O09131_GSTO1	0.890036	7.57373e-07	0.00186192
Q9WTP7_AK3	O09131_GSTO1	0.840475	1.26206e-05	0.00691676
Q9CPY7_LAP3	O09131_GSTO1	0.925026	3.96021e-08	0.000401553
P70296_PEBP1	O09131_GSTO1	0.866736	3.26514e-06	0.00376924
P55264_ADK	O09131_GSTO1	0.828085	2.20301e-05	0.0088575
P85094_ISOC2A	O09131_GSTO1	0.85168	7.31492e-06	0.00542195
Q9DC61_PMPCA	O09131_GSTO1	0.832215	1.83875e-05	0.00819496
Q8K1R3_PNPT1	O09131_GSTO1	0.83936	1.32948e-05	0.00714022
P62631_EEF1A2	E9QB02_MARS	0.841073	1.22714e-05	0.00682881
Q8CGC7_EPRS	E9QB02_MARS	0.887971	8.73029e-07	0.00198238
Q6NZJ6_EIF4G1	E9QB02_MARS	0.825414	2.47002e-05	0.00938355
Q8VDM4_PSMD2	E9QB02_MARS	0.846513	9.45686e-06	0.0060498
Q8BML9_QARS	E9QB02_MARS	0.848735	8.47753e-06	0.00575689
Q922B2_DARS	E9QB02_MARS	0.824628	2.55366e-05	0.0094547
Q8BG32_PSMD11	E9QB02_MARS	0.8242	2.60015e-05	0.00955388
Q9QXS1_PLEC	G5E895_AKR1B10	0.829546	2.06768e-05	0.00868838
P50544_ACADVL	G5E895_AKR1B10	0.849768	8.05302e-06	0.0056813
Q60932_VDAC1	G5E895_AKR1B10	0.829546	2.06768e-05	0.00868838
E9Q800_IMMT	G5E895_AKR1B10	0.847703	8.92108e-06	0.0059435
Q8QZT1_ACAT1	G5E895_AKR1B10	0.894737	5.42211e-07	0.0015988
Q9CZ13_UQCRC1	G5E895_AKR1B10	0.858028	5.26434e-06	0.00468009
A2AKU9_ATP5C1	G5E895_AKR1B10	0.83841	1.38926e-05	0.00722125
Q6PB66_LRPPRC	G5E895_AKR1B10	0.849768	8.05302e-06	0.0056813
P52825_CPT2	G5E895_AKR1B10	0.899794	3.71744e-07	0.00134725
Q91ZA3_PCCA	G5E895_AKR1B10	0.886481	9.65677e-07	0.00209168
Q99NB1_ACSS1	G5E895_AKR1B10	0.84254	1.14497e-05	0.00660456
Q9CR68_UQCRFS1	G5E895_AKR1B10	0.822922	2.74351e-05	0.00981518
Q99MR8_MCCC1	G5E895_AKR1B10	0.882353	1.26787e-06	0.00237858
Q07417_ACADS	G5E895_AKR1B10	0.834881	1.63204e-05	0.00778112
Q9D2G2_DLST	G5E895_AKR1B10	0.83015	2.01385e-05	0.00851357
P47934_CRAT	G5E895_AKR1B10	0.927207	3.14918e-08	0.000351386
Q9JHI5_IVD	G5E895_AKR1B10	0.898865	3.99024e-07	0.00137617
O55126_NIPSNAP2	G5E895_AKR1B10	0.839443	1.32436e-05	0.00713867
P47738_ALDH2	G5E895_AKR1B10	0.869386	2.80476e-06	0.00346072
P26443_GLUD1	G5E895_AKR1B10	0.844605	1.03731e-05	0.00631416
Q99MN9_PCCB	G5E895_AKR1B10	0.826625	2.34566e-05	0.00910461
E9QQ25_SPEG	G5E895_AKR1B10	0.845201	1.0079e-05	0.00622501
Q60936_COQ8A	G5E895_AKR1B10	0.855372	6.05232e-06	0.00493275
Q3ULD5_MCCC2	G5E895_AKR1B10	0.870418	2.64116e-06	0.00341531
O35855_BCAT2	G5E895_AKR1B10	0.851393	7.42169e-06	0.00542195
A0A0R4J0S3_RTN4IP1	G5E895_AKR1B10	0.849329	8.23106e-06	0.0056813
Q8K411_PITRM1	G5E895_AKR1B10	0.822922	2.74351e-05	0.00981518
Q922B1_MACROD1	G5E895_AKR1B10	0.843137	1.1129e-05	0.00652285
Q9DCZ4-3_APOO	G5E895_AKR1B10	0.846075	9.66078e-06	0.00614926
P20152_VIM	P28654_DCN	0.894737	5.42211e-07	0.0015988
Q5SXR6_CLTC	P28654_DCN	0.853457	6.68154e-06	0.00516327
P48678_LMNA	P28654_DCN	0.845201	1.0079e-05	0.00622501
P57780_ACTN4	P28654_DCN	0.835312	1.60056e-05	0.00778112
E9Q6R7_UTRN	P28654_DCN	0.885906	1.00361e-06	0.00212762
O35452_TNXB	P28654_DCN	0.910687	1.53365e-07	0.000840848
O08553_DPYSL2	P28654_DCN	0.839009	1.35127e-05	0.00714022
Q3UH59_MYH10	P28654_DCN	0.849768	8.05302e-06	0.0056813
E9PWE8_DPYSL3	P28654_DCN	0.923077	4.83258e-08	0.000445039
E9QNN1_DHX9	P28654_DCN	0.836777	1.49744e-05	0.00747811
Q62261_SPTBN1	P15116_CDH2	0.843137	1.1129e-05	0.00652285
Q08857_CD36	P15116_CDH2	0.878225	1.64827e-06	0.00269898
Q9WTR5_CDH13	P15116_CDH2	0.828689	2.14612e-05	0.00876563
P20152_VIM	O70318_EPB41L2	0.863777	3.85441e-06	0.00403015
Q61292_LAMB2	O70318_EPB41L2	0.822922	2.74351e-05	0.00981518
E9Q6R7_UTRN	O70318_EPB41L2	0.879711	1.50135e-06	0.00257952
O35452_TNXB	O70318_EPB41L2	0.931337	1.99988e-08	0.000274794
P07356_ANXA2	O70318_EPB41L2	0.833678	1.72271e-05	0.00803092
O08553_DPYSL2	O70318_EPB41L2	0.927761	2.96792e-08	0.000340944
E9PWE8_DPYSL3	O70318_EPB41L2	0.891069	7.04682e-07	0.00182928
P28654_DCN	O70318_EPB41L2	0.865841	3.43451e-06	0.0038229
O35452_TNXB	P39054_DNM2	0.832215	1.83875e-05	0.00819496
Q07417_ACADS	Q9DCT8_CRIP2	0.834881	1.63204e-05	0.00778112
Q9D0F9_PGM1	Q9DCT8_CRIP2	0.880744	1.40604e-06	0.00253446
P45376_AKR1B1	Q9DCT8_CRIP2	0.82602	2.40713e-05	0.00920404
Q3ULD5_MCCC2	Q9DCT8_CRIP2	0.864223	3.76011e-06	0.00403015
P70404_IDH3G	Q9DCT8_CRIP2	0.85493	6.1928e-06	0.00498677
Q3U3J1_BCKDHA	Q9DCT8_CRIP2	0.864223	3.76011e-06	0.00403015
E9QMK9_DGLUCY	Q9DCT8_CRIP2	0.883841	1.15069e-06	0.0022673
P32020_SCP2	Q9DCT8_CRIP2	0.828689	2.14612e-05	0.00876563
P58281-2_OPA1	Q3URE1_ACSF3	0.896801	4.65886e-07	0.00148646
Q91VA7_IDH3B	Q3URE1_ACSF3	0.853306	6.73343e-06	0.00518059
Q07417_ACADS	Q3URE1_ACSF3	0.855521	6.00563e-06	0.00491959
Q99MN9_PCCB	Q3URE1_ACSF3	0.872033	2.40176e-06	0.00323667
Q9R0H0-2_ACOX1	Q3URE1_ACSF3	0.844605	1.03731e-05	0.00631416
P55264_ADK	Q3URE1_ACSF3	0.853457	6.68154e-06	0.00516327
Q924M7_MPI	Q3URE1_ACSF3	0.876161	1.87278e-06	0.0028702
Q60597_OGDH	Q8BVI4_QDPR	0.880289	1.44734e-06	0.00253459
Q6PB66_LRPPRC	Q8BVI4_QDPR	0.83015	2.01385e-05	0.00851357
P58281-2_OPA1	Q8BVI4_QDPR	0.896801	4.65886e-07	0.00148646
Q8BFR5_TUFM	Q8BVI4_QDPR	0.839876	1.29786e-05	0.00706556
Q91ZA3_PCCA	Q8BVI4_QDPR	0.836945	1.48599e-05	0.00745234
Q91VA7_IDH3B	Q8BVI4_QDPR	0.893596	5.88877e-07	0.00168256
Q99MR8_MCCC1	Q8BVI4_QDPR	0.845201	1.0079e-05	0.00622501
Q07417_ACADS	Q8BVI4_QDPR	0.93808	8.93749e-09	0.000172476
O08528_HK2	Q8BVI4_QDPR	0.870418	2.64116e-06	0.00341531
Q9D2G2_DLST	Q8BVI4_QDPR	0.823955	2.62719e-05	0.00956106
P26443_GLUD1	Q8BVI4_QDPR	0.865256	3.5494e-06	0.00387726
Q99MN9_PCCB	Q8BVI4_QDPR	0.853457	6.68154e-06	0.00516327
Q8CHT0_ALDH4A1	Q8BVI4_QDPR	0.855521	6.00563e-06	0.00491959
Q9D0F9_PGM1	Q8BVI4_QDPR	0.8508	7.64686e-06	0.0054956
Q8CGK3_LONP1	Q8BVI4_QDPR	0.849329	8.23106e-06	0.0056813
P45376_AKR1B1	Q8BVI4_QDPR	0.903459	2.79216e-07	0.00116685
Q8K0D5_GFM1	Q8BVI4_QDPR	0.847265	9.11495e-06	0.0059435
Q3ULD5_MCCC2	Q8BVI4_QDPR	0.917914	7.99201e-08	0.000605503
P70404_IDH3G	Q8BVI4_QDPR	0.923077	4.83258e-08	0.000445039
P16045_LGALS1	Q8BVI4_QDPR	0.847265	9.11495e-06	0.0059435
O35855_BCAT2	Q8BVI4_QDPR	0.845201	1.0079e-05	0.00622501
Q3U3J1_BCKDHA	Q8BVI4_QDPR	0.938565	8.40619e-09	0.000171366
E9QMK9_DGLUCY	Q8BVI4_QDPR	0.831182	1.9246e-05	0.00842172
P53395_DBT	Q8BVI4_QDPR	0.922045	5.35875e-08	0.000482916
P32020_SCP2	Q8BVI4_QDPR	0.857585	5.38926e-06	0.00468144
P55264_ADK	Q8BVI4_QDPR	0.857585	5.38926e-06	0.00468144
Q924M7_MPI	Q8BVI4_QDPR	0.892673	6.29098e-07	0.00171429
Q9CQM9_GLRX3	Q8BVI4_QDPR	0.907589	1.99451e-07	0.000982055
Q9DCT8_CRIP2	Q8BVI4_QDPR	0.878225	1.64827e-06	0.00269898
Q91ZA3_PCCA	Q8R1S0_COQ6	0.842976	1.1215e-05	0.00654726
P47857-3_PFKM	Q8R1S0_COQ6	0.836006	1.55098e-05	0.00764372
P26443_GLUD1	Q8R1S0_COQ6	0.842377	1.15385e-05	0.00664468
Q8CHT0_ALDH4A1	Q8R1S0_COQ6	0.867769	3.07842e-06	0.00363169
A0A0R4J0S3_RTN4IP1	Q8R1S0_COQ6	0.835744	1.56955e-05	0.00770268
Q8K2B3_SDHA	Q60649_CLPB	0.869386	2.80476e-06	0.00346072
Q8QZT1_ACAT1	Q60649_CLPB	0.861713	4.31768e-06	0.00423258
Q9CZ13_UQCRC1	Q60649_CLPB	0.866288	3.34893e-06	0.00381948
Q9Z2I9_SUCLA2	Q60649_CLPB	0.822314	2.814e-05	0.00984889
Q9D2G2_DLST	Q60649_CLPB	0.848735	8.47753e-06	0.00575689
Q99MN9_PCCB	Q60649_CLPB	0.836945	1.48599e-05	0.00745234
Q8R4N0_CLYBL	Q60649_CLPB	0.847265	9.11495e-06	0.0059435
Q8K411_PITRM1	Q60649_CLPB	0.903459	2.79216e-07	0.00116685
Q9WUR2_ECI2	Q60649_CLPB	0.846513	9.45686e-06	0.0060498
Q8R164_BPHL	Q60649_CLPB	0.888545	8.39466e-07	0.00195059
Q61425_HADH	A0A0R4J023_AUH	0.841073	1.22714e-05	0.00682881
Q3ULD5_MCCC2	A0A0R4J023_AUH	0.828085	2.20301e-05	0.0088575
Q3U3J1_BCKDHA	A0A0R4J023_AUH	0.852865	6.88698e-06	0.00522979
P32020_SCP2	A0A0R4J023_AUH	0.872033	2.40176e-06	0.00323667
Q9D020_NT5C3A	Q9DBC7_PRKAR1A	0.838243	1.40001e-05	0.00726451
Q9QXS1_PLEC	A0A0R4J094_FAHD2A	0.82584	2.42565e-05	0.00926345
Q9WUB3_PYGM	A0A0R4J094_FAHD2A	0.827479	2.26126e-05	0.00903705
Q8QZT1_ACAT1	A0A0R4J094_FAHD2A	0.832215	1.83875e-05	0.00819496
Q9Z2I9_SUCLA2	A0A0R4J094_FAHD2A	0.826357	2.37276e-05	0.00917069
P52825_CPT2	A0A0R4J094_FAHD2A	0.902326	3.0542e-07	0.00120329
Q91ZA3_PCCA	A0A0R4J094_FAHD2A	0.935467	1.2337e-08	0.000207675
P47857-3_PFKM	A0A0R4J094_FAHD2A	0.837126	1.47378e-05	0.00745234
Q9CR68_UQCRFS1	A0A0R4J094_FAHD2A	0.839876	1.29789e-05	0.00706556
Q99MR8_MCCC1	A0A0R4J094_FAHD2A	0.9365	1.08793e-08	0.000198614
Q07417_ACADS	A0A0R4J094_FAHD2A	0.925142	3.91302e-08	0.000398847
E9Q7L0_OGDHL	A0A0R4J094_FAHD2A	0.895661	5.06792e-07	0.00156466
O08528_HK2	A0A0R4J094_FAHD2A	0.879132	1.55717e-06	0.00265083
P47934_CRAT	A0A0R4J094_FAHD2A	0.846074	9.66099e-06	0.00614926
Q9JHI5_IVD	A0A0R4J094_FAHD2A	0.935467	1.2337e-08	0.000207675
O55126_NIPSNAP2	A0A0R4J094_FAHD2A	0.853822	6.55743e-06	0.00516327
P26443_GLUD1	A0A0R4J094_FAHD2A	0.948347	2.16549e-09	7.09106e-05
Q99MN9_PCCB	A0A0R4J094_FAHD2A	0.908622	1.82914e-07	0.000919553
Q8CHT0_ALDH4A1	A0A0R4J094_FAHD2A	0.93237	1.77745e-08	0.000262553
Q9D0F9_PGM1	A0A0R4J094_FAHD2A	0.839876	1.29789e-05	0.00706556
A0A0G2JFH2_MAP4	A0A0R4J094_FAHD2A	0.844605	1.03731e-05	0.00631416
Q9DCM2_GSTK1	A0A0R4J094_FAHD2A	0.833161	1.76297e-05	0.00810038
Q3ULD5_MCCC2	A0A0R4J094_FAHD2A	0.926653	3.34026e-08	0.000370315
P70404_IDH3G	A0A0R4J094_FAHD2A	0.839876	1.29789e-05	0.00706556
O35855_BCAT2	A0A0R4J094_FAHD2A	0.877646	1.70878e-06	0.00274659
A0A0R4J0S3_RTN4IP1	A0A0R4J094_FAHD2A	0.96128	2.24929e-10	1.73198e-05
Q3U3J1_BCKDHA	A0A0R4J094_FAHD2A	0.872934	2.27651e-06	0.00318144
E9QMK9_DGLUCY	A0A0R4J094_FAHD2A	0.858471	5.14184e-06	0.00462779
P32020_SCP2	A0A0R4J094_FAHD2A	0.852865	6.88698e-06	0.00522979
Q924M7_MPI	A0A0R4J094_FAHD2A	0.828085	2.20301e-05	0.0088575
G5E895_AKR1B10	A0A0R4J094_FAHD2A	0.865256	3.5494e-06	0.00387726
Q8BVI4_QDPR	A0A0R4J094_FAHD2A	0.866288	3.34893e-06	0.00381948
E9PZF0_GM20390	Q62446_FKBP3	0.84814	8.73067e-06	0.00588562
Q3U3J1_BCKDHA	Q62446_FKBP3	0.82438	2.5805e-05	0.00948837
P40630_TFAM	Q62446_FKBP3	0.844605	1.03731e-05	0.00631416
Q9CQZ5_NDUFA6	Q62446_FKBP3	0.891069	7.04682e-07	0.00182928
Q8BVI4_QDPR	Q62446_FKBP3	0.829117	2.10662e-05	0.00876563
E9Q800_IMMT	P56375_ACYP2	0.82438	2.5805e-05	0.00948837
P47934_CRAT	P56375_ACYP2	0.829545	2.06772e-05	0.00868838
P47738_ALDH2	P56375_ACYP2	0.846074	9.66099e-06	0.00614926
E9QQ25_SPEG	P56375_ACYP2	0.871451	2.48583e-06	0.00327866
E9QPX3_NDUFS4	P56375_ACYP2	0.839793	1.3029e-05	0.00708837
O08532_CACNA2D1	P56375_ACYP2	0.836345	1.52727e-05	0.00754118
G3X914_CUL5	P56375_ACYP2	0.830491	1.98397e-05	0.0084792
P06728_APOA4	P08226_APOE	0.841073	1.22714e-05	0.00682881
E9Q414_APOB	P08226_APOE	0.889004	8.1343e-07	0.00195059
P21614_GC	P08226_APOE	0.902427	3.03005e-07	0.0011968
B8JJN0_GM20547	P08226_APOE	0.824987	2.51511e-05	0.0094547
Q5SXR6_CLTC	P70168_KPNB1	0.894737	5.42211e-07	0.0015988
Q8BZF8_PGM5	P70168_KPNB1	0.826625	2.34566e-05	0.00910461
P08249_MDH2	Q8K1Z0_COQ9	0.893023	6.13548e-07	0.00171429
Q9CQA3_SDHB	Q8K1Z0_COQ9	0.868802	2.90103e-06	0.00355256
Q9DB77_UQCRC2	Q8K1Z0_COQ9	0.826447	2.36365e-05	0.00913928
P20108_PRDX3	Q8K1Z0_COQ9	0.863637	3.88448e-06	0.00404782
Q9D172_D10JHU81E	Q8K1Z0_COQ9	0.835744	1.56955e-05	0.00770268
P99029_PRDX5	Q8K1Z0_COQ9	0.8781	1.66121e-06	0.00270629
Q91VW5_GOLGA4	B2RQK7_SYNPO2L	0.889463	7.88054e-07	0.00191711
P27773_PDIA3	Q3TML0_PDIA6	0.856995	5.55954e-06	0.00474786
Q8VHX6_FLNC	P14602_HSPB1	0.85493	6.1928e-06	0.00498677
Q60864_STIP1	P14602_HSPB1	0.869251	2.82678e-06	0.00347962
P07901_HSP90AA1	P14602_HSPB1	0.927207	3.14918e-08	0.000351386
Q9R0Y5-2_AK1	Q64516_GK	0.832989	1.77659e-05	0.00810038
Q8QZS1_HIBCH	Q64516_GK	0.825414	2.47002e-05	0.00938355
Q9CPY7_LAP3	Q64516_GK	0.846353	9.53082e-06	0.00609459
O09131_GSTO1	Q64516_GK	0.885271	1.04698e-06	0.00219741
P26041_MSN	Q9CW03_SMC3	0.838843	1.36169e-05	0.00716672
P14733_LMNB1	Q9CW03_SMC3	0.840827	1.24142e-05	0.00687628
P17742_PPIA	Q9CW03_SMC3	0.942149	5.25658e-09	0.000120779
P50396_GDI1	Q9CW03_SMC3	0.822739	2.76458e-05	0.00981518
E9Q3X0_MVP	Q9CW03_SMC3	0.830491	1.98397e-05	0.0084792
P39054_DNM2	Q9CW03_SMC3	0.824381	2.58045e-05	0.00948837
Q91VR5_DDX1	O35639_ANXA3	0.847108	9.18554e-06	0.00595993
P26039_TLN1	O55222_ILK	0.849329	8.23106e-06	0.0056813
A1BN54_ACTN1	O55222_ILK	0.851393	7.42169e-06	0.00542195
Q6IRU2_TPM4	O55222_ILK	0.861126	4.458e-06	0.00429063
Q922U2_KRT5	P19001_KRT19	0.880289	1.44734e-06	0.00253459
P62737_ACTA2	Q8BKZ9_PDHX	0.82189	2.86419e-05	0.00992501
Q8QZS1_HIBCH	Q8BKZ9_PDHX	0.882353	1.26787e-06	0.00237858
P20108_PRDX3	Q8BKZ9_PDHX	0.859649	4.828e-06	0.00445541
Q9JHW2_NIT2	Q8BKZ9_PDHX	0.871901	2.42057e-06	0.00324104
Q9DC70_NDUFS7	Q8BKZ9_PDHX	0.822497	2.79262e-05	0.00981518
Q8BWF0_ALDH5A1	Q8BKZ9_PDHX	0.823348	2.69506e-05	0.00974759
Q99J39_MLYCD	Q8BKZ9_PDHX	0.855224	6.09912e-06	0.00496344
P62737_ACTA2	P47754_CAPZA2	0.883841	1.15069e-06	0.0022673
Q3UIK0_MYBPC3	P47754_CAPZA2	0.832817	1.79019e-05	0.00810038
P17182_ENO1	P47754_CAPZA2	0.875581	1.94043e-06	0.00291782
P19123_TNNC1	P47754_CAPZA2	0.845201	1.0079e-05	0.00622501
A2AMM0_CAVIN4	P47754_CAPZA2	0.824987	2.51511e-05	0.0094547
P47757-4_CAPZB	P47754_CAPZA2	0.938565	8.40619e-09	0.000171366
Q64737_GART	P47754_CAPZA2	0.844009	1.06748e-05	0.006459
Q8VHX6_FLNC	P48722_HSPA4L	0.82274	2.76448e-05	0.00981518
P21981_TGM2	P48722_HSPA4L	0.909562	1.68903e-07	0.000897378
Q60864_STIP1	P48722_HSPA4L	0.903259	2.83689e-07	0.00117336
P07901_HSP90AA1	P48722_HSPA4L	0.90336	2.81421e-07	0.00117268
P14602_HSPB1	P48722_HSPA4L	0.905378	2.39269e-07	0.00107817
Q8QZT1_ACAT1	A0A0R4J0P1_ACAD8	0.8508	7.64686e-06	0.0054956
Q9Z2I9_SUCLA2	A0A0R4J0P1_ACAD8	0.872352	2.35682e-06	0.00323667
P52825_CPT2	A0A0R4J0P1_ACAD8	0.858915	5.02162e-06	0.00454378
Q91ZA3_PCCA	A0A0R4J0P1_ACAD8	0.92824	2.81839e-08	0.000338778
Q9CR68_UQCRFS1	A0A0R4J0P1_ACAD8	0.838843	1.36172e-05	0.00716672
Q99MR8_MCCC1	A0A0R4J0P1_ACAD8	0.934435	1.39613e-08	0.00022931
Q07417_ACADS	A0A0R4J0P1_ACAD8	0.930305	2.24608e-08	0.000296572
E9Q7L0_OGDHL	A0A0R4J0P1_ACAD8	0.900826	3.43329e-07	0.00127391
O08528_HK2	A0A0R4J0P1_ACAD8	0.849174	8.29505e-06	0.0057037
Q9D2G2_DLST	A0A0R4J0P1_ACAD8	0.871901	2.42063e-06	0.00324104
P47934_CRAT	A0A0R4J0P1_ACAD8	0.846074	9.66099e-06	0.00614926
Q9JHI5_IVD	A0A0R4J0P1_ACAD8	0.909654	1.67577e-07	0.000896334
O55126_NIPSNAP2	A0A0R4J0P1_ACAD8	0.849174	8.29505e-06	0.0057037
P26443_GLUD1	A0A0R4J0P1_ACAD8	0.923554	4.60518e-08	0.000433597
Q99MN9_PCCB	A0A0R4J0P1_ACAD8	0.918947	7.24635e-08	0.000563276
Q8CHT0_ALDH4A1	A0A0R4J0P1_ACAD8	0.960248	2.76734e-10	1.92091e-05
Q9D0F9_PGM1	A0A0R4J0P1_ACAD8	0.834711	1.64464e-05	0.00781365
A0A0G2JFH2_MAP4	A0A0R4J0P1_ACAD8	0.878678	1.60217e-06	0.00269704
Q60936_COQ8A	A0A0R4J0P1_ACAD8	0.82584	2.42565e-05	0.00926345
Q9DCM2_GSTK1	A0A0R4J0P1_ACAD8	0.829545	2.06772e-05	0.00868838
Q3ULD5_MCCC2	A0A0R4J0P1_ACAD8	0.945248	3.4176e-09	9.44196e-05
P70404_IDH3G	A0A0R4J0P1_ACAD8	0.912707	1.28553e-07	0.000767876
O35855_BCAT2	A0A0R4J0P1_ACAD8	0.882809	1.23095e-06	0.00237815
A0A0R4J0S3_RTN4IP1	A0A0R4J0P1_ACAD8	0.974703	7.78921e-12	1.86393e-06
Q3U3J1_BCKDHA	A0A0R4J0P1_ACAD8	0.872934	2.27651e-06	0.00318144
E9QMK9_DGLUCY	A0A0R4J0P1_ACAD8	0.836777	1.49747e-05	0.00747811
Q8K411_PITRM1	A0A0R4J0P1_ACAD8	0.845041	1.01572e-05	0.00624874
P32020_SCP2	A0A0R4J0P1_ACAD8	0.84667	9.38437e-06	0.00601553
Q8R164_BPHL	A0A0R4J0P1_ACAD8	0.852865	6.88698e-06	0.00522979
Q924M7_MPI	A0A0R4J0P1_ACAD8	0.847703	8.92108e-06	0.0059435
G5E895_AKR1B10	A0A0R4J0P1_ACAD8	0.853898	6.53199e-06	0.00516327
Q8BVI4_QDPR	A0A0R4J0P1_ACAD8	0.904492	2.5706e-07	0.00109906
Q8R1S0_COQ6	A0A0R4J0P1_ACAD8	0.831008	1.93944e-05	0.00842172
A0A0R4J094_FAHD2A	A0A0R4J0P1_ACAD8	0.964876	1.04319e-10	1.03351e-05
Q8BFR5_TUFM	A0A0M3HEQ0_TXNRD2	0.878036	1.66778e-06	0.00271521
Q8QZS1_HIBCH	A0A0M3HEQ0_TXNRD2	0.903459	2.79216e-07	0.00116685
Q9WTP7_AK3	A0A0M3HEQ0_TXNRD2	0.827052	2.30314e-05	0.00910461
P55264_ADK	A0A0M3HEQ0_TXNRD2	0.828085	2.20301e-05	0.0088575
P85094_ISOC2A	A0A0M3HEQ0_TXNRD2	0.822222	2.82482e-05	0.00988459
O09131_GSTO1	A0A0M3HEQ0_TXNRD2	0.881715	1.32118e-06	0.00242764
P80313_CCT7	Q9CYT6_CAP2	0.82189	2.86419e-05	0.00992501
Q64514_TPP2	Q9JMA1_USP14	0.83816	1.4054e-05	0.00729092
P20152_VIM	P51885_LUM	0.911249	1.46078e-07	0.000822643
Q5SXR6_CLTC	P51885_LUM	0.839009	1.35127e-05	0.00714022
P48678_LMNA	P51885_LUM	0.843137	1.1129e-05	0.00652285
P57780_ACTN4	P51885_LUM	0.84254	1.14497e-05	0.00660456
E9Q6R7_UTRN	P51885_LUM	0.877646	1.70878e-06	0.00274659
Q02788_COL6A2	P51885_LUM	0.836345	1.52727e-05	0.00754118
O35452_TNXB	P51885_LUM	0.941662	5.6123e-09	0.000126883
P07356_ANXA2	P51885_LUM	0.862604	4.11222e-06	0.00419437
O08553_DPYSL2	P51885_LUM	0.855521	6.00563e-06	0.00491959
Q8CIB5_FERMT2	P51885_LUM	0.837478	1.45015e-05	0.00745234
Q3UH59_MYH10	P51885_LUM	0.85493	6.1928e-06	0.00498677
E9PWE8_DPYSL3	P51885_LUM	0.906557	2.17265e-07	0.00100697
Q62009_POSTN	P51885_LUM	0.857585	5.38926e-06	0.00468144
P28654_DCN	P51885_LUM	0.962848	1.62399e-10	1.34728e-05
O70318_EPB41L2	P51885_LUM	0.896801	4.65886e-07	0.00148646
Q9CZ19_MYL4	P40142_TKT	0.826625	2.34566e-05	0.00910461
P19096_FASN	P40142_TKT	0.915377	1.01133e-07	0.000676287
Q3UH59_MYH10	P40142_TKT	0.839443	1.32436e-05	0.00713867
O88569_HNRNPA2B1	Q9Z204_HNRNPC	0.861428	4.3854e-06	0.00427027
Q9D0E1_HNRNPM	Q9Z204_HNRNPC	0.857735	5.34667e-06	0.00468144
Q64669_NQO1	Q8C3X2_CCDC90B	0.884874	1.07498e-06	0.00222584
Q62165_DAG1	Q8VIJ6_SFPQ	0.823773	2.64738e-05	0.00961877
P56480_ATP5B	P38060_HMGCL	0.83936	1.32948e-05	0.00714022
Q8K2B3_SDHA	P38060_HMGCL	0.869835	2.73258e-06	0.00342437
P05202_GOT2	P38060_HMGCL	0.87655	1.82861e-06	0.0028702
O08749_DLD	P38060_HMGCL	0.829029	2.11472e-05	0.00876563
Q9CQA3_SDHB	P38060_HMGCL	0.8508	7.64686e-06	0.0054956
P67778_PHB	P38060_HMGCL	0.837377	1.45686e-05	0.00745234
Q99J39_MLYCD	P38060_HMGCL	0.842733	1.13455e-05	0.00660456
P04247_MB	Q99M87_DNAJA3	0.828085	2.20301e-05	0.0088575
Q3UIK0_MYBPC3	Q99M87_DNAJA3	0.822497	2.79262e-05	0.00981518
P07310_CKM	Q99M87_DNAJA3	0.85124	7.47927e-06	0.00544089
P38647_HSPA9	Q99M87_DNAJA3	0.869386	2.80476e-06	0.00346072
Q8R5L1_C1QBP	Q99M87_DNAJA3	0.845201	1.0079e-05	0.00622501
Q9JHW2_NIT2	Q99M87_DNAJA3	0.838843	1.36169e-05	0.00716672
A2AMM0_CAVIN4	Q99M87_DNAJA3	0.847703	8.92108e-06	0.0059435
Q9WUB3_PYGM	Q8BY87_USP47	0.856995	5.55954e-06	0.00474786
P47857-3_PFKM	Q8BY87_USP47	0.841345	1.21156e-05	0.00682881
Q8VDJ3_HDLBP	Q8BY87_USP47	0.950464	1.55976e-09	5.88859e-05
Q8BW75_MAOB	Q8BY87_USP47	0.857585	5.38926e-06	0.00468144
Q6NZJ6_EIF4G1	Q8BY87_USP47	0.894629	5.46496e-07	0.00160117
Q9Z1E4_GYS1	Q8BY87_USP47	0.886481	9.65677e-07	0.00209168
P28271_ACO1	Q8BY87_USP47	0.830753	1.96126e-05	0.00842172
F6RPJ9_IDE	Q8BY87_USP47	0.835312	1.60056e-05	0.00778112
Q3B7Z2_OSBP	Q8BY87_USP47	0.822497	2.79262e-05	0.00981518
G3X914_CUL5	Q8BY87_USP47	0.883265	1.1949e-06	0.00233555
P61202_COPS2	Q8BY87_USP47	0.888545	8.39466e-07	0.00195059
E9QPE7_MYH11	P58774-2_TPM2	0.975232	6.58873e-12	1.68005e-06
Q8VCQ8_CALD1	P58774-2_TPM2	0.901394	3.28525e-07	0.00127019
Q8CIB5_FERMT2	P58774-2_TPM2	0.876816	1.79886e-06	0.00286709
Q3UH59_MYH10	P58774-2_TPM2	0.861126	4.458e-06	0.00429063
Q9DBR7_PPP1R12A	P58774-2_TPM2	0.925697	3.69363e-08	0.000385323
P37804_TAGLN	P58774-2_TPM2	0.96904	3.85141e-11	5.49594e-06
Q62009_POSTN	P58774-2_TPM2	0.847265	9.11495e-06	0.0059435
P26043_RDX	Q8JZQ9_EIF3B	0.859876	4.76939e-06	0.00445541
P45376_AKR1B1	Q6GT24_PRDX6	0.866012	3.40149e-06	0.0038229
Q8K0D5_GFM1	Q6GT24_PRDX6	0.8242	2.60015e-05	0.00955388
P16045_LGALS1	Q6GT24_PRDX6	0.855224	6.09912e-06	0.00496344
P55264_ADK	Q6GT24_PRDX6	0.828337	2.17914e-05	0.00885096
Q9CQM9_GLRX3	Q6GT24_PRDX6	0.851527	7.3716e-06	0.00542195
Q8BVI4_QDPR	Q6GT24_PRDX6	0.826269	2.38171e-05	0.00919797
Q8VDN2_ATP1A1	P62702_RPS4X	0.835312	1.60056e-05	0.00778112
Q8BL66_EEA1	E9Q9C3_AFDN	0.855148	6.12343e-06	0.00498198
Q8VDD5_MYH9	Q80YQ1_THBS1	0.940144	6.85946e-09	0.000144964
P26039_TLN1	Q80YQ1_THBS1	0.931889	1.87829e-08	0.000266044
P60710_ACTB	Q80YQ1_THBS1	0.836945	1.48599e-05	0.00745234
P18760_CFL1	Q80YQ1_THBS1	0.82602	2.40713e-05	0.00920404
P62962_PFN1	Q80YQ1_THBS1	0.827052	2.30314e-05	0.00910461
Q6IRU2_TPM4	Q80YQ1_THBS1	0.824987	2.51511e-05	0.0094547
O35452_TNXB	Q3UPL0_SEC31A	0.847703	8.92108e-06	0.0059435
P51885_LUM	Q3UPL0_SEC31A	0.843137	1.1129e-05	0.00652285
Q9CYT6_CAP2	Q9Z1Z2_STRAP	0.835744	1.56958e-05	0.00770268
Q99JY0_HADHB	A2AKD7_SNTA1	0.867905	3.05455e-06	0.00362045
P50544_ACADVL	A2AKD7_SNTA1	0.84667	9.38437e-06	0.00601553
Q60597_OGDH	A2AKD7_SNTA1	0.841073	1.22714e-05	0.00682881
Q8CC88_VWA8	A2AKD7_SNTA1	0.855521	6.00563e-06	0.00491959
Q6PB66_LRPPRC	A2AKD7_SNTA1	0.937532	9.5736e-09	0.000178335
Q07417_ACADS	A2AKD7_SNTA1	0.841073	1.22714e-05	0.00682881
Q99MN9_PCCB	A2AKD7_SNTA1	0.857585	5.38926e-06	0.00468144
Q8CGK3_LONP1	A2AKD7_SNTA1	0.847265	9.11495e-06	0.0059435
P70404_IDH3G	A2AKD7_SNTA1	0.848735	8.47753e-06	0.00575689
Q8K411_PITRM1	A2AKD7_SNTA1	0.822922	2.74351e-05	0.00981518
Q9WUR2_ECI2	A2AKD7_SNTA1	0.899226	3.88223e-07	0.00137617
Q9DBG5_PLIN3	A2AKD7_SNTA1	0.82189	2.86419e-05	0.00992501
P63101_YWHAZ	Q9JLJ2_ALDH9A1	0.82602	2.40713e-05	0.00920404
P68510_YWHAH	Q9JLJ2_ALDH9A1	0.827996	2.21148e-05	0.0088849
O08529_CAPN2	Q9JLJ2_ALDH9A1	0.829117	2.10662e-05	0.00876563
A0A075B5P2_IGKC	F6TQW2_IGHG2C	0.900362	3.55882e-07	0.0012991
P14733_LMNB1	O35381_ANP32A	0.916322	9.27196e-08	0.000653459
F6ZDS4_TPR	O35381_ANP32A	0.877066	1.77128e-06	0.00282661
Q8BTS0_DDX5	O35381_ANP32A	0.968492	4.42471e-11	6.20027e-06
A8DUK4_HBB-BS	A2A841_EPB41	0.966443	7.27679e-11	8.77403e-06
P08032_SPTA1	A2A841_EPB41	0.947858	2.33157e-09	7.3711e-05
Q91VB8_HBA-A1	A2A841_EPB41	0.907589	1.99451e-07	0.000982055
Q3UGX2_SPTB	A2A841_EPB41	0.985029	1.21125e-13	8.9715e-08
Q61171_PRDX2	A2A841_EPB41	0.903926	2.69009e-07	0.00113919
E9QNT8_ANK1	A2A841_EPB41	0.954053	8.64447e-10	4.17572e-05
P04919_SLC4A1	A2A841_EPB41	0.906557	2.17265e-07	0.00100697
P00920_CA2	A2A841_EPB41	0.962313	1.81783e-10	1.45748e-05
Q02053_UBA1	P27612_PLAA	0.869969	2.7113e-06	0.00341531
Q3TXS7_PSMD1	P27612_PLAA	0.841943	1.17785e-05	0.00674833
P97371_PSME1	P27612_PLAA	0.853457	6.68154e-06	0.00516327
P61202_COPS2	P27612_PLAA	0.830753	1.96126e-05	0.00842172
Q8BY87_USP47	P27612_PLAA	0.859649	4.828e-06	0.00445541
Q62234_MYOM1	Q6P3A8_BCKDHB	0.878554	1.61471e-06	0.00269898
Q60597_OGDH	Q6P3A8_BCKDHB	0.859949	4.7507e-06	0.00445541
B7ZCI2_NEBL	Q6P3A8_BCKDHB	0.824807	2.53435e-05	0.0094547
P14152_MDH1	Q6P3A8_BCKDHB	0.83816	1.4054e-05	0.00729092
Q61425_HADH	Q6P3A8_BCKDHB	0.838244	1.39995e-05	0.00726451
P58281-2_OPA1	Q6P3A8_BCKDHB	0.862017	4.24672e-06	0.00423258
Q8BFR5_TUFM	Q6P3A8_BCKDHB	0.861356	4.40262e-06	0.00428667
Q91VA7_IDH3B	Q6P3A8_BCKDHB	0.84687	9.29304e-06	0.00601553
P45376_AKR1B1	Q6P3A8_BCKDHB	0.916236	9.34592e-08	0.000658075
Q8K0D5_GFM1	Q6P3A8_BCKDHB	0.886823	9.43707e-07	0.00209168
Q8R5L1_C1QBP	Q6P3A8_BCKDHB	0.847546	8.99002e-06	0.0059435
P53395_DBT	Q6P3A8_BCKDHB	0.849018	8.35941e-06	0.00573945
P32020_SCP2	Q6P3A8_BCKDHB	0.844445	1.04531e-05	0.00635074
Q924M7_MPI	Q6P3A8_BCKDHB	0.875453	1.95559e-06	0.00293427
Q3URE1_ACSF3	Q6P3A8_BCKDHB	0.844445	1.04531e-05	0.00635074
Q8BVI4_QDPR	Q6P3A8_BCKDHB	0.851681	7.31459e-06	0.00542195
P14152_MDH1	Q8BMS4_COQ3	0.847107	9.18574e-06	0.00595993
Q9CQA3_SDHB	Q8BMS4_COQ3	0.858028	5.26434e-06	0.00468009
Q61425_HADH	Q8BMS4_COQ3	0.897264	4.50098e-07	0.0014864
Q9DB77_UQCRC2	Q8BMS4_COQ3	0.864223	3.76011e-06	0.00403015
P20108_PRDX3	Q8BMS4_COQ3	0.896231	4.85953e-07	0.00151445
Q9D172_D10JHU81E	Q8BMS4_COQ3	0.954053	8.64447e-10	4.17572e-05
P99029_PRDX5	Q8BMS4_COQ3	0.82602	2.40713e-05	0.00920404
Q8K1Z0_COQ9	Q8BMS4_COQ3	0.846512	9.45728e-06	0.0060498
Q00623_APOA1	Q01339_APOH	0.857438	5.43132e-06	0.00469621
P06728_APOA4	Q01339_APOH	0.897264	4.50098e-07	0.0014864
P21614_GC	Q01339_APOH	0.883264	1.19494e-06	0.00233555
P01029_C4B	Q01339_APOH	0.878678	1.60217e-06	0.00269704
B8JJN0_GM20547	Q01339_APOH	0.904442	2.58085e-07	0.00110283
E9QPE7_MYH11	B1B1A8_MYLK	0.933953	1.47815e-08	0.000230145
Q8VCQ8_CALD1	B1B1A8_MYLK	0.849768	8.05302e-06	0.0056813
Q8CIB5_FERMT2	B1B1A8_MYLK	0.824021	2.61992e-05	0.00956106
Q3UH59_MYH10	B1B1A8_MYLK	0.836345	1.52727e-05	0.00754118
P24369_PPIB	B1B1A8_MYLK	0.839009	1.35127e-05	0.00714022
Q9DBR7_PPP1R12A	B1B1A8_MYLK	0.853457	6.68154e-06	0.00516327
P37804_TAGLN	B1B1A8_MYLK	0.946336	2.92051e-09	8.49089e-05
Q62009_POSTN	B1B1A8_MYLK	0.836945	1.48599e-05	0.00745234
P51885_LUM	B1B1A8_MYLK	0.824561	2.56082e-05	0.0094547
P40142_TKT	B1B1A8_MYLK	0.841073	1.22714e-05	0.00682881
P58774-2_TPM2	B1B1A8_MYLK	0.964912	1.03473e-10	1.03351e-05
Q8CC88_VWA8	Q9CXI0_COQ5	0.836345	1.52727e-05	0.00754118
Q9Z2I9_SUCLA2	Q9CXI0_COQ5	0.880103	1.46449e-06	0.0025477
E9QLJ0_CMYA5	Q9CXI0_COQ5	0.829029	2.11472e-05	0.00876563
P58281-2_OPA1	Q9CXI0_COQ5	0.829117	2.10662e-05	0.00876563
Q8BFR5_TUFM	Q9CXI0_COQ5	0.869768	2.74328e-06	0.00343583
Q07417_ACADS	Q9CXI0_COQ5	0.917914	7.99201e-08	0.000605503
Q9D2G2_DLST	Q9CXI0_COQ5	0.881715	1.32118e-06	0.00242764
Q99MN9_PCCB	Q9CXI0_COQ5	0.860093	4.71408e-06	0.00445278
Q8CHT0_ALDH4A1	Q9CXI0_COQ5	0.852865	6.88698e-06	0.00522979
Q9D0F9_PGM1	Q9CXI0_COQ5	0.846074	9.66099e-06	0.00614926
Q8CGK3_LONP1	Q9CXI0_COQ5	0.839443	1.32436e-05	0.00713867
P45376_AKR1B1	Q9CXI0_COQ5	0.844525	1.04133e-05	0.00633517
Q3ULD5_MCCC2	Q9CXI0_COQ5	0.915289	1.01943e-07	0.000679368
P70404_IDH3G	Q9CXI0_COQ5	0.945248	3.4176e-09	9.44196e-05
A0A0R4J0S3_RTN4IP1	Q9CXI0_COQ5	0.852865	6.88698e-06	0.00522979
Q3U3J1_BCKDHA	Q9CXI0_COQ5	0.878099	1.66126e-06	0.00270629
E9QMK9_DGLUCY	Q9CXI0_COQ5	0.847624	8.95573e-06	0.0059435
Q9WVE8_PACSIN2	Q9CXI0_COQ5	0.855372	6.05246e-06	0.00493275
P32020_SCP2	Q9CXI0_COQ5	0.85493	6.1928e-06	0.00498677
P55264_ADK	Q9CXI0_COQ5	0.860093	4.71408e-06	0.00445278
Q924M7_MPI	Q9CXI0_COQ5	0.863191	3.98148e-06	0.00409069
Q9CQZ5_NDUFA6	Q9CXI0_COQ5	0.83015	2.01385e-05	0.00851357
Q9DCT8_CRIP2	Q9CXI0_COQ5	0.841508	1.2023e-05	0.00682881
Q8BVI4_QDPR	Q9CXI0_COQ5	0.917914	7.99201e-08	0.000605503
A0A0R4J094_FAHD2A	Q9CXI0_COQ5	0.840909	1.23664e-05	0.00685276
A0A0R4J0P1_ACAD8	Q9CXI0_COQ5	0.910124	1.60976e-07	0.000875173
Q6ZQ38_CAND1	P24549_ALDH1A1	0.863049	4.01265e-06	0.00411348
Q9WUB3_PYGM	Q60865_CAPRIN1	0.823347	2.69511e-05	0.00974759
P52480_PKM	Q60865_CAPRIN1	0.876613	1.82143e-06	0.0028702
P62631_EEF1A2	Q60865_CAPRIN1	0.824987	2.51511e-05	0.0094547
Q8CGC7_EPRS	Q60865_CAPRIN1	0.865702	3.46142e-06	0.00383583
Q8CHT0_ALDH4A1	Q60865_CAPRIN1	0.836345	1.52727e-05	0.00754118
Q9D0F9_PGM1	Q60865_CAPRIN1	0.907541	2.00248e-07	0.00098442
A0A0G2JFH2_MAP4	Q60865_CAPRIN1	0.877646	1.70878e-06	0.00274659
Q3U3J1_BCKDHA	Q60865_CAPRIN1	0.864669	3.66776e-06	0.003975
P51660_HSD17B4	Q60865_CAPRIN1	0.831612	1.88851e-05	0.00835923
Q9CQZ5_NDUFA6	Q60865_CAPRIN1	0.856995	5.55954e-06	0.00474786
E9PWQ3_COL6A3	P10107_ANXA1	0.851833	7.2584e-06	0.00541924
P20152_VIM	P10107_ANXA1	0.973671	1.06924e-11	2.48228e-06
Q04857_COL6A1	P10107_ANXA1	0.846074	9.66099e-06	0.00614926
P57780_ACTN4	P10107_ANXA1	0.839876	1.29789e-05	0.00706556
P24527_LTA4H	P10107_ANXA1	0.849768	8.05302e-06	0.0056813
Q02788_COL6A2	P10107_ANXA1	0.850723	7.6766e-06	0.00551366
O35452_TNXB	P10107_ANXA1	0.862603	4.11232e-06	0.00419437
P07356_ANXA2	P10107_ANXA1	0.945737	3.18604e-09	8.88109e-05
Q9DBG3-2_AP2B1	P10107_ANXA1	0.866288	3.34893e-06	0.00381948
O08553_DPYSL2	P10107_ANXA1	0.933402	1.57681e-08	0.000239512
A0A0R4J0Z1_PDIA4	P10107_ANXA1	0.833247	1.7562e-05	0.00810038
Q3UH59_MYH10	P10107_ANXA1	0.864669	3.66776e-06	0.003975
E9PWE8_DPYSL3	P10107_ANXA1	0.928719	2.67536e-08	0.000325104
Q62009_POSTN	P10107_ANXA1	0.914817	1.06418e-07	0.000696072
P28654_DCN	P10107_ANXA1	0.859061	4.98269e-06	0.00451538
O70318_EPB41L2	P10107_ANXA1	0.890036	7.57373e-07	0.00186192
P51885_LUM	P10107_ANXA1	0.894166	5.65121e-07	0.00162628
O35887_CALU	P10107_ANXA1	0.861126	4.458e-06	0.00429063
Q9JI91_ACTN2	Q9JIF9_MYOT	0.854706	6.2653e-06	0.00503484
Q9WUB3_PYGM	Q3UI33_METAP2	0.861126	4.458e-06	0.00429063
P14824_ANXA6	Q3UI33_METAP2	0.859061	4.98269e-06	0.00451538
P47857-3_PFKM	Q3UI33_METAP2	0.865117	3.57703e-06	0.00390025
Q8CGC7_EPRS	Q3UI33_METAP2	0.843573	1.09e-05	0.00652285
A0A1B0GSX0_LDHA	Q3UI33_METAP2	0.876613	1.82143e-06	0.0028702
Q9D0F9_PGM1	Q3UI33_METAP2	0.837377	1.45686e-05	0.00745234
Q8VDJ3_HDLBP	Q3UI33_METAP2	0.880289	1.44734e-06	0.00253459
Q8VDM4_PSMD2	Q3UI33_METAP2	0.898192	4.19834e-07	0.0014154
Q9Z1E4_GYS1	Q3UI33_METAP2	0.830753	1.96126e-05	0.00842172
G3X914_CUL5	Q3UI33_METAP2	0.860538	4.6023e-06	0.00439454
Q8BY87_USP47	Q3UI33_METAP2	0.874097	2.12313e-06	0.003049
Q9QVP4_MYL7	P97467_PAM	0.892673	6.29098e-07	0.00171429
Q9CZ19_MYL4	P97467_PAM	0.907121	2.0737e-07	0.000985784
Q9WUB3_PYGM	Q9Z2U0_PSMA7	0.827479	2.26126e-05	0.00903705
P52480_PKM	Q9Z2U0_PSMA7	0.859061	4.98269e-06	0.00451538
P14824_ANXA6	Q9Z2U0_PSMA7	0.875	2.01027e-06	0.00299705
P47857-3_PFKM	Q9Z2U0_PSMA7	0.848501	8.57649e-06	0.00581318
Q8CGC7_EPRS	Q9Z2U0_PSMA7	0.945248	3.4176e-09	9.44196e-05
Q11011_NPEPPS	Q9Z2U0_PSMA7	0.861733	4.3131e-06	0.00423258
Q6ZQ73_CAND2	Q9Z2U0_PSMA7	0.82602	2.40713e-05	0.00920404
Q8K1M6-3_DNM1L	Q9Z2U0_PSMA7	0.829029	2.11472e-05	0.00876563
Q8VDM4_PSMD2	Q9Z2U0_PSMA7	0.867632	3.10258e-06	0.00365437
Q8BG32_PSMD11	Q9Z2U0_PSMA7	0.907399	2.02635e-07	0.000985784
E9QB02_MARS	Q9Z2U0_PSMA7	0.843573	1.09e-05	0.00652285
Q60865_CAPRIN1	Q9Z2U0_PSMA7	0.849174	8.29505e-06	0.0057037
Q3UI33_METAP2	Q9Z2U0_PSMA7	0.858028	5.26434e-06	0.00468009
P14733_LMNB1	Q3U0V1_KHSRP	0.904442	2.58085e-07	0.00110283
Q62165_DAG1	Q3U0V1_KHSRP	0.880103	1.46449e-06	0.0025477
E9QNN1_DHX9	Q3U0V1_KHSRP	0.925065	3.94451e-08	0.000400221
P28654_DCN	Q3U0V1_KHSRP	0.848735	8.47753e-06	0.00575689
Q8VIJ6_SFPQ	Q3U0V1_KHSRP	0.862087	4.23043e-06	0.00423258
Q78PY7_SND1	P70335_ROCK1	0.856995	5.55954e-06	0.00474786
Q91VA7_IDH3B	Q91Z53_GRHPR	0.846949	9.25715e-06	0.00599601
Q8CHT0_ALDH4A1	Q91Z53_GRHPR	0.832645	1.80396e-05	0.00812975
A0A0G2JFH2_MAP4	Q91Z53_GRHPR	0.875	2.01021e-06	0.00299705
A0A0R4J0S3_RTN4IP1	Q91Z53_GRHPR	0.847108	9.18554e-06	0.00595993
A0A0R4J0P1_ACAD8	Q91Z53_GRHPR	0.833075	1.76975e-05	0.00810038
Q9CPY7_LAP3	O54988-2_SLK	0.884178	1.12547e-06	0.00225192
P85094_ISOC2A	O54988-2_SLK	0.821706	2.88618e-05	0.00998363
Q8R1Q8_DYNC1LI1	O54988-2_SLK	0.842813	1.1302e-05	0.00658891
Q9DC61_PMPCA	O54988-2_SLK	0.845638	9.86813e-06	0.00621674
Q9CY58_SERBP1	O54988-2_SLK	0.835312	1.60056e-05	0.00778112
P14824_ANXA6	Q9WUA2_FARSB	0.834109	1.68978e-05	0.00791595
P24527_LTA4H	O55029_COPB2	0.855372	6.05232e-06	0.00493275
O35452_TNXB	O55029_COPB2	0.857881	5.30545e-06	0.00468144
Q9DBG3-2_AP2B1	O55029_COPB2	0.830579	1.97634e-05	0.00845208
O08553_DPYSL2	O55029_COPB2	0.846075	9.66078e-06	0.00614926
Q61233_LCP1	O55029_COPB2	0.858472	5.14172e-06	0.00462779
O70318_EPB41L2	O55029_COPB2	0.835744	1.56955e-05	0.00770268
P55264_ADK	Q9CWG8_NDUFAF7	0.861126	4.458e-06	0.00429063
A8DUK4_HBB-BS	P46460_NSF	0.843137	1.1129e-05	0.00652285
P08032_SPTA1	P46460_NSF	0.847265	9.11495e-06	0.0059435
Q3UGX2_SPTB	P46460_NSF	0.841073	1.22714e-05	0.00682881
Q61171_PRDX2	P46460_NSF	0.885906	1.00361e-06	0.00212762
Q6ZQ38_CAND1	P46460_NSF	0.822314	2.814e-05	0.00984889
P00920_CA2	P46460_NSF	0.851393	7.42169e-06	0.00542195
A2A841_EPB41	P46460_NSF	0.868353	2.977e-06	0.00361447
P20152_VIM	B1AX58_PLS3	0.844605	1.03731e-05	0.00631416
P26041_MSN	B1AX58_PLS3	0.828085	2.20301e-05	0.0088575
E9Q6R7_UTRN	B1AX58_PLS3	0.872934	2.27651e-06	0.00318144
O35452_TNXB	B1AX58_PLS3	0.924587	4.14397e-08	0.000415847
O08553_DPYSL2	B1AX58_PLS3	0.83428	1.67683e-05	0.00786974
Q8CIB5_FERMT2	B1AX58_PLS3	0.848268	8.67587e-06	0.00587772
E9PWE8_DPYSL3	B1AX58_PLS3	0.858471	5.14184e-06	0.00462779
P28654_DCN	B1AX58_PLS3	0.871451	2.48583e-06	0.00327866
O70318_EPB41L2	B1AX58_PLS3	0.881776	1.31599e-06	0.00242153
P51885_LUM	B1AX58_PLS3	0.918947	7.24635e-08	0.000563276
Q60932_VDAC1	Q544X6_FECH	0.828424	2.17094e-05	0.008826
Q9DCX2_ATP5H	Q544X6_FECH	0.833678	1.72274e-05	0.00803092
Q9CQQ7_ATP5F1	Q544X6_FECH	0.83936	1.32948e-05	0.00714022
Q99NB1_ACSS1	Q544X6_FECH	0.911674	1.4077e-07	0.000822643
P47934_CRAT	Q544X6_FECH	0.903926	2.69009e-07	0.00113919
P47738_ALDH2	Q544X6_FECH	0.856405	5.73468e-06	0.00485964
E9QQ25_SPEG	Q544X6_FECH	0.863191	3.98148e-06	0.00409069
Q8BMF3_ME3	Q544X6_FECH	0.823864	2.63727e-05	0.00959462
Q922B1_MACROD1	Q544X6_FECH	0.844605	1.03731e-05	0.00631416
Q9DCZ4-3_APOO	Q544X6_FECH	0.854264	6.41005e-06	0.00512377
Q8K009_ALDH1L2	Q544X6_FECH	0.842975	1.12153e-05	0.00654726
G5E895_AKR1B10	Q544X6_FECH	0.84254	1.14497e-05	0.00660456
Q9WUB3_PYGM	Q9WVJ2_PSMD13	0.828512	2.16264e-05	0.0087973
P47857-3_PFKM	Q9WVJ2_PSMD13	0.83454	1.65731e-05	0.00786371
Q8CGC7_EPRS	Q9WVJ2_PSMD13	0.834711	1.64464e-05	0.00781365
Q8VDM4_PSMD2	Q9WVJ2_PSMD13	0.832472	1.81789e-05	0.00818304
Q922B2_DARS	Q9WVJ2_PSMD13	0.859733	4.80637e-06	0.00445541
Q8BG32_PSMD11	Q9WVJ2_PSMD13	0.957063	5.07556e-10	3.14528e-05
G3X914_CUL5	Q9WVJ2_PSMD13	0.841861	1.18243e-05	0.00677216
P61202_COPS2	Q9WVJ2_PSMD13	0.855963	5.86885e-06	0.00491708
Q9Z2U0_PSMA7	Q9WVJ2_PSMD13	0.863636	3.88458e-06	0.00404782
Q02053_UBA1	Q9R1P4_PSMA1	0.861713	4.31768e-06	0.00423258
Q8BG32_PSMD11	Q9R1P4_PSMA1	0.861429	4.38507e-06	0.00427027
G3X914_CUL5	Q9R1P4_PSMA1	0.847108	9.18554e-06	0.00595993
P61202_COPS2	Q9R1P4_PSMA1	0.894737	5.42211e-07	0.0015988
Q8BY87_USP47	Q9R1P4_PSMA1	0.851393	7.42169e-06	0.00542195
P27612_PLAA	Q9R1P4_PSMA1	0.849329	8.23106e-06	0.0056813
Q9WVJ2_PSMD13	Q9R1P4_PSMA1	0.855963	5.86885e-06	0.00491708
P58281-2_OPA1	P62196_PSMC5	0.822497	2.79262e-05	0.00981518
Q91VA7_IDH3B	P62196_PSMC5	0.886364	9.73283e-07	0.00209829
P49813_TMOD1	P62196_PSMC5	0.830753	1.96126e-05	0.00842172
Q924M7_MPI	P62196_PSMC5	0.896801	4.65886e-07	0.00148646
Q9CQM9_GLRX3	P62196_PSMC5	0.863191	3.98148e-06	0.00409069
Q3URE1_ACSF3	P62196_PSMC5	0.869969	2.7113e-06	0.00341531
Q60864_STIP1	Q99L47_ST13	0.848579	8.54345e-06	0.00579155
Q9CQQ7_ATP5F1	Q5GIG6_TNNI3K	0.902427	3.03005e-07	0.0011968
Q78IK4_APOOL	Q5GIG6_TNNI3K	0.845201	1.0079e-05	0.00622501
O08532_CACNA2D1	Q5GIG6_TNNI3K	0.888545	8.39466e-07	0.00195059
P14824_ANXA6	Q9DBF1_ALDH7A1	0.836345	1.52727e-05	0.00754118
P07309_TTR	Q9DBF1_ALDH7A1	0.824561	2.56082e-05	0.0094547
Q9R1P4_PSMA1	Q9DBF1_ALDH7A1	0.834881	1.63204e-05	0.00778112
Q9CPY7_LAP3	Q3TPJ8_DYNC1I2	0.831438	1.90304e-05	0.00841798
O54988-2_SLK	Q3TPJ8_DYNC1I2	0.855372	6.05246e-06	0.00493275
Q02053_UBA1	Q8R5H1_USP15	0.83015	2.01385e-05	0.00851357
Q8VDJ3_HDLBP	Q8R5H1_USP15	0.839443	1.32436e-05	0.00713867
Q922B2_DARS	Q8R5H1_USP15	0.865426	3.51558e-06	0.00387726
Q3B7Z2_OSBP	Q8R5H1_USP15	0.823955	2.62719e-05	0.00956106
Q8BG32_PSMD11	Q8R5H1_USP15	0.822557	2.78573e-05	0.00981518
G3X914_CUL5	Q8R5H1_USP15	0.837209	1.46813e-05	0.00745234
P61202_COPS2	Q8R5H1_USP15	0.906557	2.17265e-07	0.00100697
Q8BY87_USP47	Q8R5H1_USP15	0.902427	3.03005e-07	0.0011968
P27612_PLAA	Q8R5H1_USP15	0.852865	6.88698e-06	0.00522979
Q9R1P4_PSMA1	Q8R5H1_USP15	0.878678	1.60217e-06	0.00269704
Q921G7_ETFDH	P56382_ATP5E	0.838843	1.36169e-05	0.00716672
Q9CQA3_SDHB	P56382_ATP5E	0.843137	1.1129e-05	0.00652285
P20152_VIM	Q62000_OGN	0.898865	3.99024e-07	0.00137617
E9Q6R7_UTRN	Q62000_OGN	0.878678	1.60217e-06	0.00269704
P24527_LTA4H	Q62000_OGN	0.824561	2.56082e-05	0.0094547
O35452_TNXB	Q62000_OGN	0.913784	1.16797e-07	0.000746687
P07356_ANXA2	Q62000_OGN	0.82748	2.26122e-05	0.00903705
O08553_DPYSL2	Q62000_OGN	0.886481	9.65677e-07	0.00209168
Q3UH59_MYH10	Q62000_OGN	0.836345	1.52727e-05	0.00754118
E9PWE8_DPYSL3	Q62000_OGN	0.883841	1.15069e-06	0.0022673
Q62009_POSTN	Q62000_OGN	0.861713	4.31768e-06	0.00423258
P28654_DCN	Q62000_OGN	0.909185	1.74407e-07	0.000897378
O70318_EPB41L2	Q62000_OGN	0.923633	4.56846e-08	0.000432495
P51885_LUM	Q62000_OGN	0.956656	5.46578e-10	3.14875e-05
[truncated: 32,632 more rows]

## Sheet: b. Negatively Correlated
b. Negatively correlated protein pairs from quantified proteome
Protein A	Protein B	Correlation Coefficient	p value	BH-adjusted p value
P48962_SLC25A4	P14824_ANXA6	-0.849768	8.05302e-06	0.0056813
Q921G7_ETFDH	Q5SXR6_CLTC	-0.853306	6.73343e-06	0.00518059
P14152_MDH1	Q5SXR6_CLTC	-0.849768	8.05302e-06	0.0056813
Q9CQA3_SDHB	Q5SXR6_CLTC	-0.845201	1.0079e-05	0.00622501
Q61425_HADH	Q5SXR6_CLTC	-0.923633	4.56846e-08	0.000432495
Q9DB77_UQCRC2	Q5SXR6_CLTC	-0.896801	4.65886e-07	0.00148646
Q8BTM8_FLNA	Q99NB1_ACSS1	-0.830579	1.97638e-05	0.00845208
P26039_TLN1	F8VPN4_AGL	-0.837377	1.45686e-05	0.00745234
Q5SXR6_CLTC	Q9D2G2_DLST	-0.836345	1.52727e-05	0.00754118
E9PZ16_HSPG2	P23953_CES1C	-0.825841	2.42555e-05	0.00926345
P62631_EEF1A2	Q08857_CD36	-0.882353	1.26787e-06	0.00237858
P62631_EEF1A2	Q8JZQ2_AFG3L2	-0.865841	3.43451e-06	0.0038229
Q91ZJ5_UGP2	P14733_LMNB1	-0.868353	2.977e-06	0.00361447
Q9DCX2_ATP5H	P21981_TGM2	-0.845638	9.86813e-06	0.00621674
Q2TPA8_HSDL2	Q8K0E8_FGB	-0.8508	7.64686e-06	0.0054956
Q2TPA8_HSDL2	P20918_PLG	-0.823347	2.69511e-05	0.00974759
P62897_CYCS	Q80X90_FLNB	-0.839876	1.29786e-05	0.00706556
Q9JI91_ACTN2	P17742_PPIA	-0.841345	1.21156e-05	0.00682881
Q61941_NNT	P21614_GC	-0.859061	4.98269e-06	0.00451538
P97807_FH	Q60864_STIP1	-0.838843	1.36169e-05	0.00716672
Q9DCX2_ATP5H	Q60864_STIP1	-0.888889	8.19873e-07	0.00195059
Q9CQQ7_ATP5F1	Q60864_STIP1	-0.842894	1.12586e-05	0.00656912
Q8BMF3_ME3	Q60864_STIP1	-0.837209	1.46813e-05	0.00745234
Q8BH59_SLC25A12	P11983_TCP1	-0.847029	9.22132e-06	0.00597927
D3Z041_ACSL1	P97927_LAMA4	-0.836945	1.48599e-05	0.00745234
Q9Z2I9_SUCLA2	Q9WTI7_MYO1C	-0.830833	1.95441e-05	0.00842172
P62631_EEF1A2	Q9WTI7_MYO1C	-0.856849	5.60267e-06	0.00477637
E9QLJ0_CMYA5	Q9WTI7_MYO1C	-0.857291	5.47362e-06	0.00472659
Q99MR8_MCCC1	Q9WTI7_MYO1C	-0.835143	1.61286e-05	0.00778112
Q07417_ACADS	Q9WTI7_MYO1C	-0.894058	5.69569e-07	0.00163586
E9Q7L0_OGDHL	Q9WTI7_MYO1C	-0.84695	9.25695e-06	0.00599601
Q9D2G2_DLST	Q9WTI7_MYO1C	-0.878491	1.62113e-06	0.00269898
Q9JHI5_IVD	Q9WTI7_MYO1C	-0.831009	1.93937e-05	0.00842172
P26443_GLUD1	Q9WTI7_MYO1C	-0.830404	1.99158e-05	0.00850441
Q8CHT0_ALDH4A1	Q9WTI7_MYO1C	-0.896125	4.8978e-07	0.00152161
Q9D0F9_PGM1	Q9WTI7_MYO1C	-0.925543	3.75314e-08	0.000389442
Q3ULD5_MCCC2	Q9WTI7_MYO1C	-0.914685	1.07697e-07	0.000702956
P70404_IDH3G	Q9WTI7_MYO1C	-0.869701	2.75398e-06	0.00344434
E9QPE7_MYH11	O35855_BCAT2	-0.828689	2.14612e-05	0.00876563
O35855_BCAT2	Q8VCQ8_CALD1	-0.831182	1.9246e-05	0.00842172
P20108_PRDX3	A2AVJ7_RRBP1	-0.856995	5.55954e-06	0.00474786
Q9D172_D10JHU81E	A2AVJ7_RRBP1	-0.851833	7.2584e-06	0.00541924
Q9WTI7_MYO1C	A0A0R4J0S3_RTN4IP1	-0.873386	2.21578e-06	0.00311635
Q9WTI7_MYO1C	Q3U3J1_BCKDHA	-0.905378	2.39269e-07	0.00107817
Q61425_HADH	Q8CIB5_FERMT2	-0.843689	1.08393e-05	0.00652285
Q9DB77_UQCRC2	Q8CIB5_FERMT2	-0.853006	6.83761e-06	0.00522979
Q9Z2Z6_SLC25A20	A0A0R4J0Z1_PDIA4	-0.844605	1.03731e-05	0.00631416
E9Q035_GM20425	Q9CR62_SLC25A11	-0.856331	5.75698e-06	0.00487562
Q61838_PZP	Q9CR62_SLC25A11	-0.875	2.01021e-06	0.00299705
A0A087WSN6_FN1	Q9CR62_SLC25A11	-0.851163	7.50847e-06	0.00545818
E9Q414_APOB	Q9CR62_SLC25A11	-0.862016	4.24693e-06	0.00423258
Q91X72_HPX	Q9CR62_SLC25A11	-0.834711	1.6446e-05	0.00781365
G3X8Q5_CP	Q9CR62_SLC25A11	-0.883265	1.1949e-06	0.00233555
Q9Z2Z6_SLC25A20	Q9WVA4_TAGLN2	-0.829117	2.10662e-05	0.00876563
O35855_BCAT2	Q9WVA4_TAGLN2	-0.826625	2.34566e-05	0.00910461
P50544_ACADVL	P07901_HSP90AA1	-0.828085	2.20301e-05	0.0088575
Q60932_VDAC1	P07901_HSP90AA1	-0.895662	5.06775e-07	0.00156466
E9Q800_IMMT	P07901_HSP90AA1	-0.861126	4.458e-06	0.00429063
Q9DCX2_ATP5H	P07901_HSP90AA1	-0.863191	3.98148e-06	0.00409069
O09161_CASQ2	P07901_HSP90AA1	-0.826874	2.32077e-05	0.00910461
Q9CQQ7_ATP5F1	P07901_HSP90AA1	-0.839443	1.32436e-05	0.00713867
P52825_CPT2	P07901_HSP90AA1	-0.848141	8.73047e-06	0.00588562
P47934_CRAT	P07901_HSP90AA1	-0.866288	3.34893e-06	0.00381948
P47738_ALDH2	P07901_HSP90AA1	-0.891069	7.04682e-07	0.00182928
E9QQ25_SPEG	P07901_HSP90AA1	-0.853457	6.68154e-06	0.00516327
Q8BMF3_ME3	P07901_HSP90AA1	-0.82189	2.86419e-05	0.00992501
Q61425_HADH	Q3UH59_MYH10	-0.82189	2.86419e-05	0.00992501
Q9WTI7_MYO1C	P32020_SCP2	-0.87752	1.72215e-06	0.00276196
O09161_CASQ2	Q9EQP2_EHD4	-0.824807	2.53435e-05	0.0094547
Q9CR68_UQCRFS1	Q9EQP2_EHD4	-0.844605	1.03731e-05	0.00631416
P14733_LMNB1	Q61646_HP	-0.823955	2.62719e-05	0.00956106
P62631_EEF1A2	Q9CZW5_TOMM70	-0.83428	1.67683e-05	0.00786974
Q9QXS1_PLEC	Q64433_HSPE1	-0.852273	7.09795e-06	0.00535587
Q8BW75_MAOB	Q64433_HSPE1	-0.845201	1.0079e-05	0.00622501
P14733_LMNB1	Q5EBG6_HSPB6	-0.82602	2.40713e-05	0.00920404
Q9CQN1_TRAP1	P04919_SLC4A1	-0.825414	2.47002e-05	0.00938355
A2AVJ7_RRBP1	P85094_ISOC2A	-0.829974	2.02937e-05	0.00856777
Q9WTQ5_AKAP12	Q9CQ75_NDUFA2	-0.832215	1.83875e-05	0.00819496
P49813_TMOD1	Q9CPQ1_COX6C	-0.822314	2.814e-05	0.00984889
Q61646_HP	Q62165_DAG1	-0.86467	3.66766e-06	0.003975
Q99KR7_PPIF	Q9DCD0_PGD	-0.841508	1.2023e-05	0.00682881
P19096_FASN	P40630_TFAM	-0.824561	2.56082e-05	0.0094547
J3QQ13_TNNT2	Q9WTR5_CDH13	-0.845201	1.0079e-05	0.00622501
P45376_AKR1B1	Q9WTR5_CDH13	-0.824987	2.51511e-05	0.0094547
Q8BTM8_FLNA	Q921H8_ACAA1A	-0.862158	4.21396e-06	0.00423258
Q9WTI7_MYO1C	Q924M7_MPI	-0.84858	8.54307e-06	0.00579155
Q6PIE5_ATP1A2	Q924M7_MPI	-0.841073	1.22714e-05	0.00682881
Q9WTR5_CDH13	Q924M7_MPI	-0.855521	6.00563e-06	0.00491959
Q9Z2Z6_SLC25A20	Q9DBR7_PPP1R12A	-0.852865	6.88698e-06	0.00522979
O35855_BCAT2	Q9DBR7_PPP1R12A	-0.865841	3.43451e-06	0.0038229
Q61941_NNT	B8JJN0_GM20547	-0.893134	6.08717e-07	0.00171429
Q9CR62_SLC25A11	B8JJN0_GM20547	-0.827907	2.21997e-05	0.00890888
P62631_EEF1A2	Q9EQH3_VPS35	-0.913224	1.22791e-07	0.000750201
D3Z041_ACSL1	O88322_NID2	-0.830753	1.96126e-05	0.00842172
O08528_HK2	O88322_NID2	-0.863191	3.98148e-06	0.00409069
Q6ZQ73_CAND2	O88322_NID2	-0.843137	1.1129e-05	0.00652285
Q9QUR6_PREP	O88322_NID2	-0.835312	1.60056e-05	0.00778112
P32020_SCP2	O88322_NID2	-0.828689	2.14612e-05	0.00876563
A0A0A0MQF6_GAPDH	E9QNN1_DHX9	-0.896481	4.77074e-07	0.00151223
J3QQ13_TNNT2	E9QNN1_DHX9	-0.869835	2.73251e-06	0.00342437
Q91VA7_IDH3B	E9QNN1_DHX9	-0.829369	2.08366e-05	0.00874922
P49813_TMOD1	E9QNN1_DHX9	-0.822314	2.814e-05	0.00984889
Q5EBG6_HSPB6	E9QNN1_DHX9	-0.836777	1.49744e-05	0.00747811
Q924M7_MPI	E9QNN1_DHX9	-0.830579	1.97634e-05	0.00845208
A2AVJ7_RRBP1	Q9DCL9_PAICS	-0.836693	1.50324e-05	0.00750308
Q9WTI7_MYO1C	Q9CQZ5_NDUFA6	-0.84858	8.54307e-06	0.00579155
P42227_STAT3	Q9QUM9_PSMA6	-0.858471	5.14184e-06	0.00462779
Q924M7_MPI	P09055-2_ITGB1	-0.875581	1.94043e-06	0.00291782
P62737_ACTA2	Q6GQT9_NOMO1	-0.871901	2.42063e-06	0.00324104
Q9JI91_ACTN2	Q6GQT9_NOMO1	-0.823165	2.71578e-05	0.00981407
P19123_TNNC1	Q6GQT9_NOMO1	-0.892101	6.55184e-07	0.00174055
P47757-4_CAPZB	Q6GQT9_NOMO1	-0.831612	1.88851e-05	0.00835923
P62737_ACTA2	A2AN08-5_UBR4	-0.832558	1.81094e-05	0.00815701
Q3UIK0_MYBPC3	A2AN08-5_UBR4	-0.855372	6.05232e-06	0.00493275
P17182_ENO1	A2AN08-5_UBR4	-0.863566	3.89974e-06	0.00406035
P47757-4_CAPZB	A2AN08-5_UBR4	-0.872352	2.35682e-06	0.00323667
Q3UIK0_MYBPC3	P39054_DNM2	-0.872033	2.40176e-06	0.00323667
A2AMM0_CAVIN4	P39054_DNM2	-0.827052	2.30314e-05	0.00910461
Q9WTI7_MYO1C	Q9DCT8_CRIP2	-0.839277	1.33455e-05	0.00714022
Q9WTI7_MYO1C	Q8BVI4_QDPR	-0.875453	1.95559e-06	0.00293427
Q5SXR6_CLTC	A0A0R4J023_AUH	-0.839009	1.35127e-05	0.00714022
Q9WTR5_CDH13	A0A0R4J023_AUH	-0.872033	2.40176e-06	0.00323667
Q9WTI7_MYO1C	A0A0R4J094_FAHD2A	-0.872803	2.29436e-06	0.00320408
O88322_NID2	A0A0R4J094_FAHD2A	-0.822922	2.74351e-05	0.00981518
Q08857_CD36	P61089_UBE2N	-0.851393	7.42169e-06	0.00542195
Q9CZW5_TOMM70	P61089_UBE2N	-0.85493	6.1928e-06	0.00498677
Q9WTR5_CDH13	P61089_UBE2N	-0.843137	1.1129e-05	0.00652285
P09055-2_ITGB1	P61089_UBE2N	-0.873516	2.19861e-06	0.00309791
A2AKU9_ATP5C1	Q9R0P5_DSTN	-0.839443	1.32436e-05	0.00713867
E9Q7L0_OGDHL	Q9R0P5_DSTN	-0.835312	1.60056e-05	0.00778112
Q9DCM2_GSTK1	Q9R0P5_DSTN	-0.840475	1.26206e-05	0.00691676
Q8BMF3_ME3	Q9R0P5_DSTN	-0.859061	4.98269e-06	0.00451538
P07901_HSP90AA1	P56375_ACYP2	-0.829117	2.10662e-05	0.00876563
P48962_SLC25A4	P08226_APOE	-0.890609	7.27747e-07	0.00182928
Q61941_NNT	P08226_APOE	-0.824561	2.56082e-05	0.0094547
Q9CR62_SLC25A11	P08226_APOE	-0.845042	1.01569e-05	0.00624874
Q61425_HADH	P70168_KPNB1	-0.855521	6.00563e-06	0.00491959
Q9DB77_UQCRC2	P70168_KPNB1	-0.824561	2.56082e-05	0.0094547
P45376_AKR1B1	P70168_KPNB1	-0.83015	2.01385e-05	0.00851357
P51660_HSD17B4	P70168_KPNB1	-0.836345	1.52727e-05	0.00754118
P32020_SCP2	P70168_KPNB1	-0.890609	7.27747e-07	0.00182928
A0A0R4J023_AUH	P70168_KPNB1	-0.832817	1.79019e-05	0.00810038
Q60932_VDAC1	P14602_HSPB1	-0.88062	1.41713e-06	0.00253459
P47738_ALDH2	P14602_HSPB1	-0.883264	1.19494e-06	0.00233555
E9QQ25_SPEG	P14602_HSPB1	-0.877646	1.70878e-06	0.00274659
Q8K009_ALDH1L2	P14602_HSPB1	-0.864669	3.66776e-06	0.003975
P48787_TNNI3	P46935_NEDD4	-0.85493	6.1928e-06	0.00498677
Q8BFP9_PDK1	P19001_KRT19	-0.825414	2.47002e-05	0.00938355
P17742_PPIA	Q9D6Y9_GBE1	-0.843137	1.1129e-05	0.00652285
P26043_RDX	Q9D6Y9_GBE1	-0.828085	2.20301e-05	0.0088575
P20918_PLG	Q64669_NQO1	-0.880165	1.45875e-06	0.00254113
P62827_RAN	Q64669_NQO1	-0.871451	2.48583e-06	0.00327866
A0A1B0GSG5_RNH1	Q9WTX6_CUL1	-0.861945	4.26345e-06	0.00423258
E9QNP0_KXD1	Q9ESW4_AGK	-0.826625	2.34566e-05	0.00910461
Q9DCX2_ATP5H	P48722_HSPA4L	-0.827818	2.22847e-05	0.0089418
Q9CQQ7_ATP5F1	P48722_HSPA4L	-0.823682	2.6575e-05	0.00965348
E9QQ25_SPEG	P48722_HSPA4L	-0.824807	2.53435e-05	0.0094547
O08532_CACNA2D1	P48722_HSPA4L	-0.821706	2.88608e-05	0.00998363
Q9WTI7_MYO1C	A0A0R4J0P1_ACAD8	-0.907446	2.0184e-07	0.000985784
P40630_TFAM	P40142_TKT	-0.892673	6.29098e-07	0.00171429
P20918_PLG	Q8C3X2_CCDC90B	-0.85493	6.1928e-06	0.00498677
Q9JMA1_USP14	Q8VIJ6_SFPQ	-0.846591	9.4208e-06	0.0060349
Q9JI91_ACTN2	Q8JZQ9_EIF3B	-0.836439	1.52074e-05	0.00754118
D3Z041_ACSL1	Q02819_NUCB1	-0.822922	2.74351e-05	0.00981518
Q91ZJ5_UGP2	O35381_ANP32A	-0.845638	9.86813e-06	0.00621674
Q5SXR6_CLTC	Q6P3A8_BCKDHB	-0.860983	4.49264e-06	0.00431591
Q9WTR5_CDH13	Q6P3A8_BCKDHB	-0.823774	2.64728e-05	0.00961877
A2AVJ7_RRBP1	Q8BMS4_COQ3	-0.845558	9.90641e-06	0.00622501
P10649_GSTM1	A0A0R4J0I6_ACAD11	-0.831612	1.88847e-05	0.00835923
Q9WTI7_MYO1C	Q9CXI0_COQ5	-0.928129	2.85242e-08	0.000340944
Q9WTI7_MYO1C	Q60865_CAPRIN1	-0.833506	1.73602e-05	0.00808545
Q8JZQ9_EIF3B	Q9JIF9_MYOT	-0.841262	1.21629e-05	0.00682881
E9Q9C1_ABLIM1	P97467_PAM	-0.881776	1.31599e-06	0.00242153
Q8BGH2_SAMM50	P46460_NSF	-0.844605	1.03731e-05	0.00631416
P07901_HSP90AA1	Q544X6_FECH	-0.836345	1.52727e-05	0.00754118
E9QNN1_DHX9	P62196_PSMC5	-0.858472	5.14172e-06	0.00462779
Q6PHQ9_PABPC4	E9QP99_GOLGA3	-0.871318	2.50537e-06	0.00329744
Q6ZQ38_CAND1	P56382_ATP5E	-0.836777	1.49744e-05	0.00747811
Q9EQP2_EHD4	Q99LB2_DHRS4	-0.824561	2.56082e-05	0.0094547
Q925I1_ATAD3	P80317_CCT6A	-0.879132	1.55717e-06	0.00265083
Q8BTM8_FLNA	Q8CG76_AKR7A2	-0.835744	1.56958e-05	0.00770268
Q14BI5_MYOM2	Q9DCN2_CYB5R3	-0.822922	2.74351e-05	0.00981518
P07310_CKM	Q9DCN2_CYB5R3	-0.897728	4.3475e-07	0.00145743
P14152_MDH1	Q9DCN2_CYB5R3	-0.94476	3.66327e-09	9.92672e-05
P20108_PRDX3	Q9DCN2_CYB5R3	-0.849329	8.23106e-06	0.0056813
Q9D172_D10JHU81E	Q9DCN2_CYB5R3	-0.822497	2.79262e-05	0.00981518
P62631_EEF1A2	Q9R069_BCAM	-0.834881	1.63204e-05	0.00778112
Q924M7_MPI	Q9R069_BCAM	-0.826625	2.34566e-05	0.00910461
A0A0R4J023_AUH	Q9R069_BCAM	-0.845201	1.0079e-05	0.00622501
P61089_UBE2N	Q9R069_BCAM	-0.884417	1.10792e-06	0.00223022
Q9CXI0_COQ5	Q9R069_BCAM	-0.83428	1.67683e-05	0.00786974
Q6PIE5_ATP1A2	Q6P549_INPPL1	-0.822497	2.79262e-05	0.00981518
Q61941_NNT	Q8QZR5_GPT	-0.859649	4.828e-06	0.00445541
Q9WTI7_MYO1C	Q8QZR5_GPT	-0.836177	1.53901e-05	0.00758767
E9QNN1_DHX9	Q9JK92_HSPB8	-0.837209	1.46813e-05	0.00745234
Q61941_NNT	P19221_F2	-0.863191	3.98148e-06	0.00409069
Q8BW75_MAOB	O70400_PDLIM1	-0.861713	4.31768e-06	0.00423258
Q9Z1Q9_VARS	O70400_PDLIM1	-0.912752	1.2804e-07	0.00076599
O08532_CACNA2D1	O70400_PDLIM1	-0.822497	2.79262e-05	0.00981518
O08532_CACNA2D1	Q05816_FABP5	-0.900929	3.40618e-07	0.00127082
J3QQ13_TNNT2	Q6P4T2_SNRNP200	-0.859649	4.828e-06	0.00445541
P17751_TPI1	Q8CGY8_OGT	-0.866736	3.26505e-06	0.00376924
P61202_COPS2	Q99L13_HIBADH	-0.822922	2.74351e-05	0.00981518
O35350_CAPN1	Q99L13_HIBADH	-0.825413	2.47006e-05	0.00938355
P06684_C5	Q99K48_NONO	-0.846951	9.25633e-06	0.00599601
Q61646_HP	Q99K48_NONO	-0.828337	2.17914e-05	0.00885096
Q99L13_HIBADH	Q06770_SERPINA6	-0.858471	5.14184e-06	0.00462779
P48962_SLC25A4	Q9DB05_NAPA	-0.900827	3.43317e-07	0.00127391
Q9JI91_ACTN2	Q8K4Z5_SF3A1	-0.824807	2.53435e-05	0.0094547
O70250_PGAM2	Q8K4Z5_SF3A1	-0.880289	1.44734e-06	0.00253459
P62631_EEF1A2	Q3ULF4_SPG7	-0.853156	6.78546e-06	0.00521582
O70250_PGAM2	Q9CXJ4_ABCB8	-0.861713	4.31768e-06	0.00423258
Q9WTX6_CUL1	P35385_HSPB7	-0.84254	1.14497e-05	0.00660456
P62631_EEF1A2	P40336-2_VPS26A	-0.919505	6.86926e-08	0.000545691
P32020_SCP2	P40336-2_VPS26A	-0.847265	9.11495e-06	0.0059435
Q60864_STIP1	Q9CQ69_UQCRQ	-0.90119	3.33783e-07	0.00127082
P48722_HSPA4L	Q9CQ69_UQCRQ	-0.887681	8.90433e-07	0.00201602
Q9CPQ1_COX6C	Q3UHZ5_LMOD2	-0.83781	1.42819e-05	0.00737789
O35350_CAPN1	Q3UMF0_COBLL1	-0.875517	1.94806e-06	0.00292732
P14152_MDH1	P49817_CAV1	-0.837377	1.45686e-05	0.00745234
Q8CC88_VWA8	P49817_CAV1	-0.824561	2.56082e-05	0.0094547
Q9Z2I9_SUCLA2	P49817_CAV1	-0.841943	1.17785e-05	0.00674833
Q61425_HADH	P49817_CAV1	-0.830753	1.96126e-05	0.00842172
Q924M7_MPI	P49817_CAV1	-0.888545	8.39466e-07	0.00195059
A0A0R4J023_AUH	P49817_CAV1	-0.839009	1.35127e-05	0.00714022
Q6P3A8_BCKDHB	P49817_CAV1	-0.821706	2.88608e-05	0.00998363
Q9CXI0_COQ5	P49817_CAV1	-0.861126	4.458e-06	0.00429063
Q924M7_MPI	Q99PV0_PRPF8	-0.84667	9.38437e-06	0.00601553
Q9WTX6_CUL1	P28474_ADH5	-0.865256	3.5494e-06	0.00387726
Q9CQM9_GLRX3	Q61739_ITGA6	-0.828085	2.20301e-05	0.0088575
Q8QZR5_GPT	Q61739_ITGA6	-0.822497	2.79262e-05	0.00981518
Q9DCX2_ATP5H	Q8BK64_AHSA1	-0.843492	1.09423e-05	0.00652285
Q9CQQ7_ATP5F1	Q8BK64_AHSA1	-0.86157	4.35145e-06	0.00424481
O08532_CACNA2D1	Q8BK64_AHSA1	-0.83015	2.01385e-05	0.00851357
Q9CQ69_UQCRQ	Q8BK64_AHSA1	-0.898656	4.05384e-07	0.00138891
Q3UIK0_MYBPC3	Q7TMB8_CYFIP1	-0.832817	1.79019e-05	0.00810038
P07310_CKM	Q7TMB8_CYFIP1	-0.881199	1.3657e-06	0.00249361
Q62234_MYOM1	Q7TMB8_CYFIP1	-0.869969	2.7113e-06	0.00341531
A6ZI44_ALDOA	Q7TMB8_CYFIP1	-0.828689	2.14612e-05	0.00876563
B7ZCI2_NEBL	Q7TMB8_CYFIP1	-0.836945	1.48599e-05	0.00745234
P14152_MDH1	Q7TMB8_CYFIP1	-0.840475	1.26206e-05	0.00691676
J3QQ13_TNNT2	Q7TMB8_CYFIP1	-0.843137	1.1129e-05	0.00652285
Q8BFR5_TUFM	Q7TMB8_CYFIP1	-0.836777	1.49744e-05	0.00747811
P45376_AKR1B1	Q7TMB8_CYFIP1	-0.870418	2.64116e-06	0.00341531
Q8K0D5_GFM1	Q7TMB8_CYFIP1	-0.863777	3.85441e-06	0.00403015
Q8R5L1_C1QBP	Q7TMB8_CYFIP1	-0.826625	2.34566e-05	0.00910461
Q924M7_MPI	Q7TMB8_CYFIP1	-0.822497	2.79262e-05	0.00981518
Q8BVI4_QDPR	Q7TMB8_CYFIP1	-0.824561	2.56082e-05	0.0094547
Q99M87_DNAJA3	Q7TMB8_CYFIP1	-0.824561	2.56082e-05	0.0094547
Q6P3A8_BCKDHB	Q7TMB8_CYFIP1	-0.931267	2.01579e-08	0.000276279
Q9JK92_HSPB8	Q7TMB8_CYFIP1	-0.822922	2.74351e-05	0.00981518
P28665_MUG1	A0A0R4J081_NDUFAF1	-0.924587	4.14376e-08	0.000415847
Q8BL66_EEA1	P29699_AHSG	-0.82937	2.08362e-05	0.00874922
P14152_MDH1	P97429_ANXA4	-0.87655	1.82861e-06	0.0028702
Q5SXR6_CLTC	A0A140LIU4_COX7A1	-0.902993	2.89752e-07	0.00117336
P70168_KPNB1	A0A140LIU4_COX7A1	-0.828689	2.14612e-05	0.00876563
P49817_CAV1	A0A140LIU4_COX7A1	-0.828689	2.14612e-05	0.00876563
P97429_ANXA4	A0A140LIU4_COX7A1	-0.851833	7.2584e-06	0.00541924
P62737_ACTA2	Q9CU62_SMC1A	-0.865256	3.5494e-06	0.00387726
Q9JI91_ACTN2	Q9CU62_SMC1A	-0.844445	1.04531e-05	0.00635074
Q3UIK0_MYBPC3	Q9CU62_SMC1A	-0.865841	3.43451e-06	0.0038229
P07310_CKM	Q9CU62_SMC1A	-0.826447	2.36365e-05	0.00913928
Q62234_MYOM1	Q9CU62_SMC1A	-0.874097	2.12313e-06	0.003049
O70250_PGAM2	Q9CU62_SMC1A	-0.878225	1.64827e-06	0.00269898
P09411_PGK1	Q9CU62_SMC1A	-0.868802	2.90103e-06	0.00355256
Q9JHW2_NIT2	Q9CU62_SMC1A	-0.824381	2.58045e-05	0.00948837
P28474_ADH5	Q9CU62_SMC1A	-0.824561	2.56082e-05	0.0094547
Q9R0P5_DSTN	Q8R2Q4_GFM2	-0.845042	1.01569e-05	0.00624874
Q9JMA1_USP14	Q569Z6_THRAP3	-0.826446	2.36369e-05	0.00913928
P62631_EEF1A2	P21278_GNA11	-0.853457	6.68154e-06	0.00516327
Q07417_ACADS	P21278_GNA11	-0.828689	2.14612e-05	0.00876563
Q9D0F9_PGM1	P21278_GNA11	-0.859061	4.98269e-06	0.00451538
P45376_AKR1B1	P21278_GNA11	-0.869386	2.80476e-06	0.00346072
P32020_SCP2	P21278_GNA11	-0.832817	1.79019e-05	0.00810038
Q924M7_MPI	P21278_GNA11	-0.890609	7.27747e-07	0.00182928
Q9DCT8_CRIP2	P21278_GNA11	-0.832817	1.79019e-05	0.00810038
Q8BVI4_QDPR	P21278_GNA11	-0.832817	1.79019e-05	0.00810038
P61089_UBE2N	P21278_GNA11	-0.824561	2.56082e-05	0.0094547
Q9CXI0_COQ5	P21278_GNA11	-0.882809	1.23095e-06	0.00237815
D3Z041_ACSL1	Q6P8X1_SNX6	-0.827052	2.30314e-05	0.00910461
Q9CXJ4_ABCB8	Q8R086_SUOX	-0.867321	3.15826e-06	0.0036745
P40630_TFAM	Q91V92_ACLY	-0.865841	3.43451e-06	0.0038229
P16125_LDHB	Q3U7R1_ESYT1	-0.853457	6.68154e-06	0.00516327
P53395_DBT	Q3U7R1_ESYT1	-0.866288	3.34893e-06	0.00381948
A0A0R4J083_ACADL	P25444_RPS2	-0.849329	8.23106e-06	0.0056813
P07901_HSP90AA1	P97478_COQ7	-0.888545	8.39466e-07	0.00195059
P70398_USP9X	Q9WU79_PRODH	-0.844961	1.01965e-05	0.0062692
Q58A65_SPAG9	Q9WU79_PRODH	-0.903359	2.81442e-07	0.00117268
P62737_ACTA2	P53994_RAB2A	-0.864083	3.78957e-06	0.00403015
Q14BI5_MYOM2	P53994_RAB2A	-0.828941	2.12284e-05	0.00876563
P19123_TNNC1	P53994_RAB2A	-0.84091	1.23661e-05	0.00685276
P14152_MDH1	P53994_RAB2A	-0.82584	2.42565e-05	0.00926345
P20108_PRDX3	P53994_RAB2A	-0.85124	7.47927e-06	0.00544089
Q62234_MYOM1	P70704_ATP8A1	-0.859649	4.828e-06	0.00445541
J3QQ13_TNNT2	P70704_ATP8A1	-0.853457	6.68154e-06	0.00516327
Q9Z2Z6_SLC25A20	P10126_EEF1A1	-0.858028	5.26434e-06	0.00468009
P40630_TFAM	P10126_EEF1A1	-0.847265	9.11495e-06	0.0059435
P62631_EEF1A2	Q99JB8_PACSIN3	-0.824561	2.56082e-05	0.0094547
Q64514_TPP2	Q99JB8_PACSIN3	-0.829975	2.0293e-05	0.00856777
Q8QZR5_GPT	Q99JB8_PACSIN3	-0.874097	2.12313e-06	0.003049
Q9QXS1_PLEC	P63028_TPT1	-0.852713	6.94064e-06	0.00526104
Q9WUB3_PYGM	P63028_TPT1	-0.833678	1.72274e-05	0.00803092
Q8CI94_PYGB	P63028_TPT1	-0.840909	1.23664e-05	0.00685276
E9QQ25_SPEG	P63028_TPT1	-0.831182	1.9246e-05	0.00842172
F6RPJ9_IDE	P63028_TPT1	-0.846074	9.66099e-06	0.00614926
O08532_CACNA2D1	P63028_TPT1	-0.860093	4.71408e-06	0.00445278
Q8K009_ALDH1L2	P63028_TPT1	-0.928719	2.67536e-08	0.000325104
Q544X6_FECH	P63028_TPT1	-0.867769	3.0785e-06	0.00363169
Q5GIG6_TNNI3K	P63028_TPT1	-0.83015	2.01385e-05	0.00851357
Q9D4H8_CUL2	P63028_TPT1	-0.885847	1.00758e-06	0.00213284
P97927_LAMA4	Q149B8_PERM1	-0.843137	1.1129e-05	0.00652285
O88322_NID2	Q149B8_PERM1	-0.874097	2.12313e-06	0.003049
Q924M7_MPI	P60766_CDC42	-0.882353	1.26787e-06	0.00237858
A0A0R4J023_AUH	P60766_CDC42	-0.865841	3.43451e-06	0.0038229
P61089_UBE2N	P60766_CDC42	-0.905057	2.45589e-07	0.00107817
Q9CXI0_COQ5	P60766_CDC42	-0.835312	1.60056e-05	0.00778112
Q8QZR5_GPT	P60766_CDC42	-0.822497	2.79262e-05	0.00981518
P07310_CKM	A0A1L1STC6_SYNE1	-0.821706	2.88618e-05	0.00998363
J3QQ13_TNNT2	A0A1L1STC6_SYNE1	-0.82602	2.40713e-05	0.00920404
D3Z041_ACSL1	P31750_AKT1	-0.829117	2.10662e-05	0.00876563
P51660_HSD17B4	P31750_AKT1	-0.850723	7.6766e-06	0.00551366
P32020_SCP2	P31750_AKT1	-0.848735	8.47753e-06	0.00575689
Q9CPQ1_COX6C	Q99L45_EIF2S2	-0.856848	5.60294e-06	0.00477637
Q9EQP2_EHD4	Q9CRB8_MTFP1	-0.82602	2.40713e-05	0.00920404
A2ASS6_TTN	P62814_ATP6V1B2	-0.894983	5.32577e-07	0.0015988
P14152_MDH1	Q91YQ5_RPN1	-0.835659	1.57563e-05	0.00773016
P99029_PRDX5	Q91YQ5_RPN1	-0.823348	2.69506e-05	0.00974759
J3QQ13_TNNT2	P08752_GNAI2	-0.83015	2.01385e-05	0.00851357
P45376_AKR1B1	P08752_GNAI2	-0.843492	1.09423e-05	0.00652285
Q924M7_MPI	P08752_GNAI2	-0.873516	2.19861e-06	0.00309791
Q6P3A8_BCKDHB	P08752_GNAI2	-0.833506	1.73602e-05	0.00808545
P62737_ACTA2	Q61187_TSG101	-0.887397	9.07793e-07	0.00204757
P19123_TNNC1	Q61187_TSG101	-0.839443	1.32436e-05	0.00713867
Q3UIK0_MYBPC3	A2AIX1_SEC16A	-0.822497	2.79262e-05	0.00981518
P60766_CDC42	Q8VE38_OXNAD1	-0.824561	2.56082e-05	0.0094547
E9PZF0_GM20390	Q61543_GLG1	-0.82189	2.86419e-05	0.00992501
Q8R1S0_COQ6	Q61543_GLG1	-0.854339	6.38508e-06	0.00510551
Q91Z53_GRHPR	Q61543_GLG1	-0.822314	2.814e-05	0.00984889
P62631_EEF1A2	Q9WV55_VAPA	-0.863777	3.85441e-06	0.00403015
Q07417_ACADS	Q9WV55_VAPA	-0.830753	1.96126e-05	0.00842172
G3X8T9_SERPINA3N	Q60714_SLC27A1	-0.828689	2.14612e-05	0.00876563
Q8CC88_VWA8	Q91V41_RAB14	-0.866736	3.26505e-06	0.00376924
J3QQ13_TNNT2	Q5SS83_FLOT2	-0.836945	1.48599e-05	0.00745234
P01029_C4B	Q5SS83_FLOT2	-0.874097	2.12313e-06	0.003049
Q924M7_MPI	Q5SS83_FLOT2	-0.841073	1.22714e-05	0.00682881
B8JJN0_GM20547	Q5SS83_FLOT2	-0.883841	1.15069e-06	0.0022673
Q01339_APOH	Q5SS83_FLOT2	-0.822922	2.74351e-05	0.00981518
P19221_F2	Q5SS83_FLOT2	-0.867321	3.15826e-06	0.0036745
Q9D0F9_PGM1	E9PVZ8_GOLGB1	-0.862158	4.21396e-06	0.00423258
E9PZF0_GM20390	E9PVZ8_GOLGB1	-0.8508	7.64686e-06	0.0054956
Q3U3J1_BCKDHA	E9PVZ8_GOLGB1	-0.872483	2.33843e-06	0.0032311
E9QPX3_NDUFS4	E9PVZ8_GOLGB1	-0.881199	1.3657e-06	0.00249361
Q9CQZ5_NDUFA6	E9PVZ8_GOLGB1	-0.921569	5.61752e-08	0.000485694
Q9CXI0_COQ5	E9PVZ8_GOLGB1	-0.827052	2.30314e-05	0.00910461
P97927_LAMA4	Q9CQZ6_NDUFB3	-0.83841	1.38926e-05	0.00722125
P50544_ACADVL	Q8BH61_F13A1	-0.841508	1.2023e-05	0.00682881
E9Q800_IMMT	Q8BH61_F13A1	-0.862158	4.21396e-06	0.00423258
Q9DCX2_ATP5H	Q8BH61_F13A1	-0.833247	1.7562e-05	0.00810038
Q921G7_ETFDH	Q8BH61_F13A1	-0.861571	4.35134e-06	0.00424481
Q8QZT1_ACAT1	Q8BH61_F13A1	-0.915377	1.01133e-07	0.000676287
Q9CZ13_UQCRC1	Q8BH61_F13A1	-0.879711	1.50135e-06	0.00257952
A2AKU9_ATP5C1	Q8BH61_F13A1	-0.879711	1.50135e-06	0.00257952
P52825_CPT2	Q8BH61_F13A1	-0.830579	1.97634e-05	0.00845208
Q99NB1_ACSS1	Q8BH61_F13A1	-0.855963	5.86885e-06	0.00491708
Q9CR68_UQCRFS1	Q8BH61_F13A1	-0.867321	3.15826e-06	0.0036745
Q9D2G2_DLST	Q8BH61_F13A1	-0.868353	2.977e-06	0.00361447
P47934_CRAT	Q8BH61_F13A1	-0.855963	5.86885e-06	0.00491708
Q9JHI5_IVD	Q8BH61_F13A1	-0.861713	4.31768e-06	0.00423258
O55126_NIPSNAP2	Q8BH61_F13A1	-0.907589	1.99451e-07	0.000982055
Q9Z2Z6_SLC25A20	Q8BH61_F13A1	-0.890036	7.57373e-07	0.00186192
Q3ULD5_MCCC2	Q8BH61_F13A1	-0.840475	1.26206e-05	0.00691676
O35855_BCAT2	Q8BH61_F13A1	-0.886481	9.65677e-07	0.00209168
Q91VM9_PPA2	Q8BH61_F13A1	-0.823955	2.62719e-05	0.00956106
Q922B1_MACROD1	Q8BH61_F13A1	-0.869969	2.7113e-06	0.00341531
Q8R164_BPHL	Q8BH61_F13A1	-0.907121	2.0737e-07	0.000985784
Q9DCZ4-3_APOO	Q8BH61_F13A1	-0.930786	2.12833e-08	0.000287882
Q99LB2_DHRS4	Q8BH61_F13A1	-0.878225	1.64827e-06	0.00269898
Q8R2Q4_GFM2	Q8BH61_F13A1	-0.846075	9.66078e-06	0.00614926
P97478_COQ7	Q8BH61_F13A1	-0.826625	2.34566e-05	0.00910461
P62631_EEF1A2	Q8C129_LNPEP	-0.913313	1.21822e-07	0.000748656
Q8BML9_QARS	Q8C129_LNPEP	-0.828085	2.20301e-05	0.0088575
Q8K010_OPLAH	Q8C129_LNPEP	-0.828689	2.14612e-05	0.00876563
Q8QZR5_GPT	Q8C129_LNPEP	-0.836945	1.48599e-05	0.00745234
Q61425_HADH	Q6P5F9_XPO1	-0.853457	6.68154e-06	0.00516327
P58281-2_OPA1	Q6P5F9_XPO1	-0.826625	2.34566e-05	0.00910461
P45376_AKR1B1	Q6P5F9_XPO1	-0.860093	4.71408e-06	0.00445278
P32020_SCP2	Q6P5F9_XPO1	-0.847265	9.11495e-06	0.0059435
Q8K010_OPLAH	Q6P5F9_XPO1	-0.851393	7.42169e-06	0.00542195
Q924M7_MPI	Q6P5F9_XPO1	-0.843137	1.1129e-05	0.00652285
Q3URE1_ACSF3	Q6P5F9_XPO1	-0.826625	2.34566e-05	0.00910461
A0A0R4J023_AUH	Q6P5F9_XPO1	-0.872033	2.40176e-06	0.00323667
Q6P3A8_BCKDHB	Q6P5F9_XPO1	-0.875453	1.95559e-06	0.00293427
Q7TMB8_CYFIP1	O88441_MTX2	-0.842976	1.1215e-05	0.00654726
P40142_TKT	Q8K2C6_SIRT5	-0.824561	2.56082e-05	0.0094547
Q3U7R1_ESYT1	Q8K2C6_SIRT5	-0.836945	1.48599e-05	0.00745234
Q8BH61_F13A1	Q8K2C6_SIRT5	-0.859649	4.828e-06	0.00445541
P97450_ATP5J	P17427_AP2A2	-0.832645	1.80396e-05	0.00812975
P99029_PRDX5	P17427_AP2A2	-0.867769	3.07842e-06	0.00363169
P47754_CAPZA2	P17427_AP2A2	-0.822314	2.814e-05	0.00984889
Q61941_NNT	Q61584_FXR1	-0.874548	2.06605e-06	0.00304692
Q9CPQ1_COX6C	Q61584_FXR1	-0.853747	6.5829e-06	0.00516327
Q9QYJ0_DNAJA2	E9PV45_USP24	-0.829029	2.11472e-05	0.00876563
Q9DCZ4-3_APOO	Q924B0_IMPA1	-0.846949	9.25715e-06	0.00599601
Q9WTI7_MYO1C	Q3U3G8_SERHL	-0.841345	1.21156e-05	0.00682881
Q9DB20_ATP5O	P19324_SERPINH1	-0.828941	2.12284e-05	0.00876563
A1BN54_ACTN1	F7A8H6_GPX4	-0.825414	2.47002e-05	0.00938355
Q9CPQ1_COX6C	Q8C3X4_GUF1	-0.825414	2.47002e-05	0.00938355
Q924M7_MPI	P63094_GNAS	-0.865841	3.43451e-06	0.0038229
B8JJN0_GM20547	P63094_GNAS	-0.856995	5.55954e-06	0.00474786
P61089_UBE2N	P63094_GNAS	-0.878225	1.64827e-06	0.00269898
Q8QZR5_GPT	P63094_GNAS	-0.861713	4.31768e-06	0.00423258
P19221_F2	P63094_GNAS	-0.823955	2.62719e-05	0.00956106
Q61584_FXR1	P63094_GNAS	-0.827052	2.30314e-05	0.00910461
P14602_HSPB1	Q91V64_ISOC1	-0.8508	7.64686e-06	0.0054956
P63028_TPT1	Q91V64_ISOC1	-0.852865	6.88698e-06	0.00522979
P97927_LAMA4	D3Z316_1700021F05RIK	-0.839009	1.35127e-05	0.00714022
Q9WTI7_MYO1C	D3Z316_1700021F05RIK	-0.916797	8.87302e-08	0.000628247
P60766_CDC42	D3Z316_1700021F05RIK	-0.830753	1.96126e-05	0.00842172
E9PVZ8_GOLGB1	D3Z316_1700021F05RIK	-0.826625	2.34566e-05	0.00910461
Q3ULF4_SPG7	Q03734_SERPINA3M	-0.822132	2.83546e-05	0.00991495
P19123_TNNC1	A0A087WR45_PROB1	-0.853748	6.58259e-06	0.00516327
O70250_PGAM2	A0A087WR45_PROB1	-0.828942	2.12276e-05	0.00876563
P35235-2_PTPN11	A0A087WR45_PROB1	-0.848501	8.57649e-06	0.00581318
A0A0R4J023_AUH	Q99P72_RTN4	-0.852865	6.88698e-06	0.00522979
A0A140LIU4_COX7A1	Q99P72_RTN4	-0.855963	5.86885e-06	0.00491708
Q8VCT4_CES1D	Q8BXK9_CLIC5	-0.828337	2.17914e-05	0.00885096
F6RPJ9_IDE	Q8BXK9_CLIC5	-0.844285	1.05344e-05	0.00639655
O08532_CACNA2D1	Q8BXK9_CLIC5	-0.849019	8.35885e-06	0.00573945
Q8K009_ALDH1L2	Q8BXK9_CLIC5	-0.826695	2.33865e-05	0.00910461
O70250_PGAM2	Q6PD03_PPP2R5A	-0.918947	7.24635e-08	0.000563276
A0A0R4J1E2_EEF1D	Q6PD03_PPP2R5A	-0.865116	3.57722e-06	0.00390025
P35235-2_PTPN11	Q6PD03_PPP2R5A	-0.852273	7.09812e-06	0.00535587
Q8R086_SUOX	Q6PD03_PPP2R5A	-0.844008	1.0675e-05	0.006459
P05132_PRKACA	Q99KH8_STK24	-0.832215	1.83875e-05	0.00819496
Q921G7_ETFDH	Q8BJ71_NUP93	-0.824381	2.58045e-05	0.00948837
Q61425_HADH	Q8BJ71_NUP93	-0.863777	3.85441e-06	0.00403015
Q9DB77_UQCRC2	Q8BJ71_NUP93	-0.884417	1.10792e-06	0.00223022
A0A140LIU4_COX7A1	Q8BJ71_NUP93	-0.913313	1.21822e-07	0.000748656
A2ASS6_TTN	Q9Z0U1_TJP2	-0.84325	1.10694e-05	0.00652285
A2AN08-5_UBR4	Q9WTX5_SKP1	-0.888372	8.4945e-07	0.00196207
Q3U2A8_VARS2	E9Q1G8_SEPT7	-0.836177	1.53901e-05	0.00758767
Q8BH64_EHD2	Q9CPU0_GLO1	-0.876161	1.87278e-06	0.0028702
Q00623_APOA1	Q3UUU2_FUBP1	-0.823955	2.62719e-05	0.00956106
G3X977_ITIH2	Q3UUU2_FUBP1	-0.822497	2.79262e-05	0.00981518
Q9DBD0_ICA	Q3UUU2_FUBP1	-0.840475	1.26206e-05	0.00691676
E9Q9C1_ABLIM1	P05125_NPPA	-0.822922	2.74351e-05	0.00981518
Q9Z2Z6_SLC25A20	Q9JJ28_FLII	-0.847703	8.92108e-06	0.0059435
Q60649_CLPB	P37040_POR	-0.839009	1.35127e-05	0.00714022
Q9CPQ1_COX6C	P60670_NPLOC4	-0.837909	1.42173e-05	0.00737182
P07310_CKM	P84078_ARF1	-0.83781	1.42819e-05	0.00737789
P14152_MDH1	P84078_ARF1	-0.926175	3.51314e-08	0.000382931
Q61425_HADH	P84078_ARF1	-0.874097	2.12313e-06	0.003049
Q9DB77_UQCRC2	P84078_ARF1	-0.824561	2.56082e-05	0.0094547
Q9D172_D10JHU81E	P84078_ARF1	-0.905057	2.45589e-07	0.00107817
Q6P3A8_BCKDHB	P84078_ARF1	-0.889924	7.63326e-07	0.00187018
Q8BMS4_COQ3	P84078_ARF1	-0.869386	2.80476e-06	0.00346072
A0A140LIU4_COX7A1	P84078_ARF1	-0.839009	1.35127e-05	0.00714022
P47809_MAP2K4	P84078_ARF1	-0.840475	1.26206e-05	0.00691676
I3ITR1_AK157302	Q8CCJ3_UFL1	-0.872033	2.40176e-06	0.00323667
P58281-2_OPA1	Q3TLP8_RAC1	-0.822497	2.79262e-05	0.00981518
Q91VA7_IDH3B	Q3TLP8_RAC1	-0.831612	1.88847e-05	0.00835923
Q07417_ACADS	Q3TLP8_RAC1	-0.847265	9.11495e-06	0.0059435
P45376_AKR1B1	Q3TLP8_RAC1	-0.84254	1.14497e-05	0.00660456
Q924M7_MPI	Q3TLP8_RAC1	-0.911249	1.46078e-07	0.000822643
Q9CQM9_GLRX3	Q3TLP8_RAC1	-0.82602	2.40713e-05	0.00920404
Q3URE1_ACSF3	Q3TLP8_RAC1	-0.845201	1.0079e-05	0.00622501
Q8BVI4_QDPR	Q3TLP8_RAC1	-0.826625	2.34566e-05	0.00910461
A0A0R4J023_AUH	Q3TLP8_RAC1	-0.822497	2.79262e-05	0.00981518
P61089_UBE2N	Q3TLP8_RAC1	-0.834881	1.63204e-05	0.00778112
Q6P3A8_BCKDHB	Q3TLP8_RAC1	-0.843412	1.09841e-05	0.00652285
Q9CXI0_COQ5	Q3TLP8_RAC1	-0.852865	6.88698e-06	0.00522979
Q8QZR5_GPT	Q3TLP8_RAC1	-0.828689	2.14612e-05	0.00876563
Q8VE38_OXNAD1	Q3TLP8_RAC1	-0.830753	1.96126e-05	0.00842172
P40630_TFAM	Q8BRF7_SCFD1	-0.866288	3.34893e-06	0.00381948
O08528_HK2	Q99JB2_STOML2	-0.883721	1.15978e-06	0.00228204
Q6ZQ73_CAND2	Q99JB2_STOML2	-0.865703	3.46133e-06	0.00383583
Q149B8_PERM1	Q99JB2_STOML2	-0.853306	6.73343e-06	0.00518059
Q3U3G8_SERHL	Q99JB2_STOML2	-0.825414	2.47002e-05	0.00938355
A2AVJ7_RRBP1	Q9CZN8_QRSL1	-0.848735	8.47753e-06	0.00575689
Q91VA7_IDH3B	P27661_H2AFX	-0.876034	1.88747e-06	0.00287861
P49813_TMOD1	P27661_H2AFX	-0.843137	1.1129e-05	0.00652285
Q9CQM9_GLRX3	P27661_H2AFX	-0.862158	4.21396e-06	0.00423258
Q91Z53_GRHPR	P27661_H2AFX	-0.848141	8.73047e-06	0.00588562
P62196_PSMC5	P27661_H2AFX	-0.929825	2.36926e-08	0.000297433
Q9JK92_HSPB8	P27661_H2AFX	-0.82602	2.40713e-05	0.00920404
Q8K0Z7_TACO1	P27661_H2AFX	-0.833247	1.7562e-05	0.00810038
Q8VE38_OXNAD1	P27661_H2AFX	-0.830753	1.96126e-05	0.00842172
Q8C3X4_GUF1	P27661_H2AFX	-0.851393	7.42169e-06	0.00542195
P60670_NPLOC4	P27661_H2AFX	-0.838078	1.41068e-05	0.00731645
Q9QXS1_PLEC	P21107_TPM3	-0.829546	2.06768e-05	0.00868838
F8VPN4_AGL	P21107_TPM3	-0.882809	1.23095e-06	0.00237815
P09542_MYL3	Q3TCH7_CUL4A	-0.836345	1.52727e-05	0.00754118
P62737_ACTA2	P18654_RPS6KA3	-0.890036	7.57373e-07	0.00186192
Q9JI91_ACTN2	P18654_RPS6KA3	-0.922999	4.87095e-08	0.000446503
P19123_TNNC1	P18654_RPS6KA3	-0.824561	2.56082e-05	0.0094547
O70250_PGAM2	P18654_RPS6KA3	-0.834881	1.63204e-05	0.00778112
P14152_MDH1	P97742_CPT1A	-0.83841	1.38926e-05	0.00722125
Q9D172_D10JHU81E	P97742_CPT1A	-0.853457	6.68154e-06	0.00516327
Q921G7_ETFDH	Q8BHN3-2_GANAB	-0.858472	5.14172e-06	0.00462779
P16125_LDHB	Q8BHN3-2_GANAB	-0.839009	1.35127e-05	0.00714022
Q9D2G2_DLST	Q8BHN3-2_GANAB	-0.852865	6.88698e-06	0.00522979
P70404_IDH3G	Q8BHN3-2_GANAB	-0.827052	2.30314e-05	0.00910461
Q8BVI4_QDPR	Q8BHN3-2_GANAB	-0.830753	1.96126e-05	0.00842172
Q8K2C6_SIRT5	Q8BHN3-2_GANAB	-0.857585	5.38926e-06	0.00468144
P62631_EEF1A2	P55284_CDH5	-0.832817	1.79019e-05	0.00810038
A0A0R4J023_AUH	P55284_CDH5	-0.843137	1.1129e-05	0.00652285
P61089_UBE2N	P55284_CDH5	-0.853457	6.68154e-06	0.00516327
A0A0G2JFH2_MAP4	Q6P069_SRI	-0.86305	4.01245e-06	0.00411348
P51660_HSD17B4	Q6P069_SRI	-0.927095	3.18719e-08	0.000355118
P32020_SCP2	Q6P069_SRI	-0.896125	4.8978e-07	0.00152161
Q60865_CAPRIN1	Q6P069_SRI	-0.838677	1.37224e-05	0.00721075
Q149B8_PERM1	Q6P069_SRI	-0.844445	1.04531e-05	0.00635074
D3Z316_1700021F05RIK	Q6P069_SRI	-0.885789	1.01148e-06	0.00213804
Q9JI91_ACTN2	Q61033_TMPO	-0.86305	4.01245e-06	0.00411348
Q3UIK0_MYBPC3	Q61033_TMPO	-0.834881	1.63204e-05	0.00778112
Q62234_MYOM1	Q61033_TMPO	-0.896801	4.65886e-07	0.00148646
O70250_PGAM2	Q61033_TMPO	-0.900929	3.40618e-07	0.00127082
P70296_PEBP1	Q61033_TMPO	-0.887971	8.73029e-07	0.00198238
Q6P3A8_BCKDHB	Q61033_TMPO	-0.839277	1.33455e-05	0.00714022
P28474_ADH5	Q61033_TMPO	-0.890609	7.27747e-07	0.00182928
Q8R086_SUOX	Q61033_TMPO	-0.828085	2.20301e-05	0.0088575
Q9QXS1_PLEC	Q3TMX5_MANF	-0.845915	9.73606e-06	0.00619274
Q9CQQ7_ATP5F1	Q3TMX5_MANF	-0.840827	1.24142e-05	0.00687628
Q9DC69_NDUFA9	Q3TMX5_MANF	-0.858179	5.22245e-06	0.00468009
Q78IK4_APOOL	Q3TMX5_MANF	-0.825414	2.47002e-05	0.00938355
Q9Z1Q9_VARS	Q3TMX5_MANF	-0.862016	4.24693e-06	0.00423258
O08532_CACNA2D1	Q3TMX5_MANF	-0.838843	1.36169e-05	0.00716672
P62631_EEF1A2	Q07113_IGF2R	-0.851393	7.42169e-06	0.00542195
A0A0R4J023_AUH	Q07113_IGF2R	-0.861713	4.31768e-06	0.00423258
P61089_UBE2N	Q07113_IGF2R	-0.843137	1.1129e-05	0.00652285
Q8QZR5_GPT	Q07113_IGF2R	-0.845201	1.0079e-05	0.00622501
Q8BH61_F13A1	Q91VT4_CBR4	-0.872033	2.40176e-06	0.00323667
P62737_ACTA2	E9PWR4_DIP2C	-0.953512	9.47584e-10	4.50733e-05
P19123_TNNC1	E9PWR4_DIP2C	-0.913784	1.16797e-07	0.000746687
O70250_PGAM2	E9PWR4_DIP2C	-0.929272	2.51816e-08	0.000308168
P47757-4_CAPZB	E9PWR4_DIP2C	-0.907025	2.09025e-07	0.000986416
P47754_CAPZA2	E9PWR4_DIP2C	-0.85493	6.1928e-06	0.00498677
P35385_HSPB7	E9PWR4_DIP2C	-0.855963	5.86885e-06	0.00491708
A0A0R4J093_CMPK1	E9PWR4_DIP2C	-0.834711	1.64464e-05	0.00781365
F8VPN4_AGL	P20065_TMSB4X	-0.881776	1.31599e-06	0.00242153
O08528_HK2	P20065_TMSB4X	-0.858028	5.26434e-06	0.00468009
Q6ZQ73_CAND2	P20065_TMSB4X	-0.863777	3.85441e-06	0.00403015
Q8QZR5_GPT	P20065_TMSB4X	-0.826625	2.34566e-05	0.00910461
G5E8J6_HRC	P20065_TMSB4X	-0.824561	2.56082e-05	0.0094547
Q149B8_PERM1	P20065_TMSB4X	-0.824561	2.56082e-05	0.0094547
Q9WTX6_CUL1	P61082_UBE2M	-0.889463	7.88079e-07	0.00191711
E9PWR4_DIP2C	P61082_UBE2M	-0.850207	7.8782e-06	0.00561721
F8VPN4_AGL	P21107-2_TPM3	-0.835744	1.56958e-05	0.00770268
Q9DAR7_DCPS	Q9JLV5_CUL3	-0.856921	5.58123e-06	0.0047636
P97742_CPT1A	Q9JLV5_CUL3	-0.858028	5.26434e-06	0.00468009
Q9DB05_NAPA	O35143_ATPIF1	-0.8646	3.68208e-06	0.00398663
P22599_SERPINA1B	O35143_ATPIF1	-0.875581	1.94043e-06	0.00291782
Q64514_TPP2	Q8R2G4_ART3	-0.82274	2.76448e-05	0.00981518
Q922B2_DARS	Q8R2G4_ART3	-0.850494	7.76536e-06	0.00556558
A0A0R4J094_FAHD2A	Q8R2G4_ART3	-0.82189	2.86419e-05	0.00992501
Q9D0R2_TARS	Q8R2G4_ART3	-0.822497	2.79262e-05	0.00981518
O70435_PSMA3	Q8R2G4_ART3	-0.864084	3.78937e-06	0.00403015
P62631_EEF1A2	B1ARB3_PECAM1	-0.839009	1.35127e-05	0.00714022
E9QLJ0_CMYA5	B1ARB3_PECAM1	-0.836345	1.52727e-05	0.00754118
Q9CXI0_COQ5	B1ARB3_PECAM1	-0.865256	3.5494e-06	0.00387726
P99028_UQCRH	B1ARB3_PECAM1	-0.834881	1.63204e-05	0.00778112
Q62234_MYOM1	O08917_FLOT1	-0.883841	1.15069e-06	0.0022673
J3QQ13_TNNT2	O08917_FLOT1	-0.856995	5.55954e-06	0.00474786
P45376_AKR1B1	O08917_FLOT1	-0.879132	1.55717e-06	0.00265083
P49813_TMOD1	O08917_FLOT1	-0.84254	1.14497e-05	0.00660456
Q61646_HP	O08917_FLOT1	-0.84254	1.14497e-05	0.00660456
B8JJN0_GM20547	O08917_FLOT1	-0.850723	7.6766e-06	0.00551366
Q9CQM9_GLRX3	O08917_FLOT1	-0.828512	2.16264e-05	0.0087973
Q6P3A8_BCKDHB	O08917_FLOT1	-0.847984	8.79838e-06	0.00592524
Q01339_APOH	O08917_FLOT1	-0.823864	2.63727e-05	0.00959462
Q8R086_SUOX	O08917_FLOT1	-0.845041	1.01572e-05	0.00624874
Q61584_FXR1	O08917_FLOT1	-0.886364	9.73314e-07	0.00209829
Q9CQQ7_ATP5F1	Q9CXW3_CACYBP	-0.853155	6.78593e-06	0.00521582
Q9CQ69_UQCRQ	Q9CXW3_CACYBP	-0.82971	2.05292e-05	0.00866036
Q60932_VDAC1	Q61699_HSPH1	-0.838843	1.36169e-05	0.00716672
P47738_ALDH2	Q61699_HSPH1	-0.852865	6.88698e-06	0.00522979
E9QQ25_SPEG	Q61699_HSPH1	-0.828689	2.14612e-05	0.00876563
Q9CQ69_UQCRQ	Q61699_HSPH1	-0.860983	4.49264e-06	0.00431591
Q8QZS1_HIBCH	G5E8R4_PPP6R3	-0.847108	9.18554e-06	0.00595993
P70296_PEBP1	G5E8R4_PPP6R3	-0.826873	2.32086e-05	0.00910461
Q9CXT8_PMPCB	G5E8R4_PPP6R3	-0.856848	5.60294e-06	0.00477637
A6ZI44_ALDOA	G5E829_ATP2B1	-0.822497	2.79262e-05	0.00981518
P14152_MDH1	G5E829_ATP2B1	-0.909654	1.67577e-07	0.000896334
Q8QZS1_HIBCH	G5E829_ATP2B1	-0.834881	1.63204e-05	0.00778112
Q9D172_D10JHU81E	G5E829_ATP2B1	-0.886481	9.65677e-07	0.00209168
Q6P3A8_BCKDHB	G5E829_ATP2B1	-0.843412	1.09841e-05	0.00652285
P28474_ADH5	G5E829_ATP2B1	-0.830753	1.96126e-05	0.00842172
Q8C0M9_ASRGL1	G5E829_ATP2B1	-0.878678	1.60217e-06	0.00269704
P63028_TPT1	Q8BGC4_ZADH2	-0.83428	1.67683e-05	0.00786974
Q62234_MYOM1	A0A1W2P768_HIST2H3C1	-0.921569	5.61752e-08	0.000485694
B7ZCI2_NEBL	A0A1W2P768_HIST2H3C1	-0.828689	2.14612e-05	0.00876563
J3QQ13_TNNT2	A0A1W2P768_HIST2H3C1	-0.834881	1.63204e-05	0.00778112
P45376_AKR1B1	A0A1W2P768_HIST2H3C1	-0.889004	8.1343e-07	0.00195059
Q8K0D5_GFM1	A0A1W2P768_HIST2H3C1	-0.836945	1.48599e-05	0.00745234
P49813_TMOD1	A0A1W2P768_HIST2H3C1	-0.839009	1.35127e-05	0.00714022
P70296_PEBP1	A0A1W2P768_HIST2H3C1	-0.885906	1.00361e-06	0.00212762
Q924M7_MPI	A0A1W2P768_HIST2H3C1	-0.849329	8.23106e-06	0.0056813
Q3URE1_ACSF3	A0A1W2P768_HIST2H3C1	-0.828689	2.14612e-05	0.00876563
Q6P3A8_BCKDHB	A0A1W2P768_HIST2H3C1	-0.933334	1.58936e-08	0.000240479
Q9JK92_HSPB8	A0A1W2P768_HIST2H3C1	-0.83015	2.01385e-05	0.00851357
Q8K0Z7_TACO1	A0A1W2P768_HIST2H3C1	-0.83015	2.01385e-05	0.00851357
P28474_ADH5	A0A1W2P768_HIST2H3C1	-0.822497	2.79262e-05	0.00981518
Q8VE38_OXNAD1	A0A1W2P768_HIST2H3C1	-0.863777	3.85441e-06	0.00403015
O88441_MTX2	A0A1W2P768_HIST2H3C1	-0.847108	9.18554e-06	0.00595993
Q61584_FXR1	A0A1W2P768_HIST2H3C1	-0.866288	3.34893e-06	0.00381948
Q9JLV5_CUL3	A0A1W2P768_HIST2H3C1	-0.833247	1.7562e-05	0.00810038
P62631_EEF1A2	P55292_DSC2	-0.827052	2.30314e-05	0.00910461
Q60864_STIP1	Q9CZP5_BCS1L	-0.86615	3.37518e-06	0.0038229
P07901_HSP90AA1	Q9CZP5_BCS1L	-0.83428	1.67683e-05	0.00786974
Q8BK64_AHSA1	Q9CZP5_BCS1L	-0.85124	7.47944e-06	0.00544089
Q61699_HSPH1	Q9CZP5_BCS1L	-0.833247	1.7562e-05	0.00810038
Q62234_MYOM1	Q8CCK0_H2AFY2	-0.826625	2.34566e-05	0.00910461
O70250_PGAM2	Q8CCK0_H2AFY2	-0.830753	1.96126e-05	0.00842172
Q9D172_D10JHU81E	Q8CCK0_H2AFY2	-0.836945	1.48599e-05	0.00745234
P70296_PEBP1	Q8CCK0_H2AFY2	-0.880744	1.40604e-06	0.00253446
Q9QYJ0_DNAJA2	Q8CCK0_H2AFY2	-0.827052	2.30314e-05	0.00910461
P28474_ADH5	Q8CCK0_H2AFY2	-0.869969	2.7113e-06	0.00341531
Q9JLV5_CUL3	Q8CCK0_H2AFY2	-0.847703	8.92108e-06	0.0059435
Q05D44_EIF5B	O35286_DHX15	-0.82602	2.40713e-05	0.00920404
A0A1L1STE6_IDH3A	Q9WVL3_SLC12A7	-0.832215	1.83875e-05	0.00819496
Q62234_MYOM1	O54962_BANF1	-0.828689	2.14612e-05	0.00876563
Q6P3A8_BCKDHB	O54962_BANF1	-0.866151	3.37501e-06	0.0038229
Q61584_FXR1	O54962_BANF1	-0.82602	2.40713e-05	0.00920404
Q9JLV5_CUL3	O54962_BANF1	-0.873516	2.19861e-06	0.00309791
J3QQ13_TNNT2	P21447_ABCB1A	-0.834881	1.63204e-05	0.00778112
Q9JJW5_MYOZ2	P21447_ABCB1A	-0.8508	7.64686e-06	0.0054956
Q9CQM9_GLRX3	P21447_ABCB1A	-0.848735	8.47753e-06	0.00575689
Q62446_FKBP3	P21447_ABCB1A	-0.874548	2.06605e-06	0.00304692
Q9JK92_HSPB8	P21447_ABCB1A	-0.836345	1.52727e-05	0.00754118
A0A0R4J081_NDUFAF1	Q8VCU2_GPLD1	-0.860538	4.6023e-06	0.00439454
J3QQ13_TNNT2	E9Q3Y4_LRBA	-0.889004	8.1343e-07	0.00195059
P05201_GOT1	E9Q3Y4_LRBA	-0.822314	2.81405e-05	0.00984889
Q9D0F9_PGM1	E9Q3Y4_LRBA	-0.833161	1.76297e-05	0.00810038
P45376_AKR1B1	E9Q3Y4_LRBA	-0.910124	1.60976e-07	0.000875173
P16045_LGALS1	E9Q3Y4_LRBA	-0.84254	1.14497e-05	0.00660456
P49813_TMOD1	E9Q3Y4_LRBA	-0.82189	2.86419e-05	0.00992501
Q924M7_MPI	E9Q3Y4_LRBA	-0.839443	1.32436e-05	0.00713867
Q9CQM9_GLRX3	E9Q3Y4_LRBA	-0.877066	1.77128e-06	0.00282661
Q8QZR5_GPT	E9Q3Y4_LRBA	-0.872483	2.33843e-06	0.0032311
Q9JK92_HSPB8	E9Q3Y4_LRBA	-0.834711	1.64464e-05	0.00781365
Q8C3X4_GUF1	E9Q3Y4_LRBA	-0.845638	9.86813e-06	0.00621674
P17183_ENO2	E9Q3Y4_LRBA	-0.830579	1.97638e-05	0.00845208
Q14BI5_MYOM2	Q9JKF1_IQGAP1	-0.860093	4.71408e-06	0.00445278
Q9Z2I9_SUCLA2	Q9QUI0_RHOA	-0.82748	2.26122e-05	0.00903705
Q07417_ACADS	Q9QUI0_RHOA	-0.857585	5.38926e-06	0.00468144
E9Q7L0_OGDHL	Q9QUI0_RHOA	-0.84667	9.38437e-06	0.00601553
Q924M7_MPI	Q9QUI0_RHOA	-0.896801	4.65886e-07	0.00148646
A0A0R4J023_AUH	Q9QUI0_RHOA	-0.843137	1.1129e-05	0.00652285
P61089_UBE2N	Q9QUI0_RHOA	-0.890609	7.27747e-07	0.00182928
Q9CXI0_COQ5	Q9QUI0_RHOA	-0.865256	3.5494e-06	0.00387726
Q8VE38_OXNAD1	Q9QUI0_RHOA	-0.822497	2.79262e-05	0.00981518
Q3U3G8_SERHL	Q9QUI0_RHOA	-0.828689	2.14612e-05	0.00876563
D3Z316_1700021F05RIK	Q9QUI0_RHOA	-0.851393	7.42169e-06	0.00542195
Q9CPQ1_COX6C	Q9WVQ5_APIP	-0.829546	2.06768e-05	0.00868838
Q8K4Z5_SF3A1	Q9WVQ5_APIP	-0.851393	7.42169e-06	0.00542195
Q9CU62_SMC1A	Q9WVQ5_APIP	-0.849329	8.23106e-06	0.0056813
Q6PD03_PPP2R5A	Q9WVQ5_APIP	-0.839443	1.32436e-05	0.00713867
Q61033_TMPO	Q9WVQ5_APIP	-0.898865	3.99024e-07	0.00137617
O08917_FLOT1	Q9WVQ5_APIP	-0.887971	8.73029e-07	0.00198238
A0A1W2P768_HIST2H3C1	Q9WVQ5_APIP	-0.874097	2.12313e-06	0.003049
Q8CCK0_H2AFY2	Q9WVQ5_APIP	-0.894737	5.42211e-07	0.0015988
O54962_BANF1	Q9WVQ5_APIP	-0.847265	9.11495e-06	0.0059435
O08917_FLOT1	Q91YJ5_MTIF2	-0.841942	1.17788e-05	0.00674833
A0A1W2P768_HIST2H3C1	Q91YJ5_MTIF2	-0.847703	8.92108e-06	0.0059435
E9Q3Y4_LRBA	Q91YJ5_MTIF2	-0.860537	4.60241e-06	0.00439454
Q61941_NNT	A0A0R4J032_C9	-0.822497	2.79262e-05	0.00981518
F6ZDS4_TPR	A0A0R4J032_C9	-0.859061	4.98269e-06	0.00451538
P10649_GSTM1	A0A0R4J032_C9	-0.84091	1.23661e-05	0.00685276
Q9CPQ1_COX6C	A0A0R4J032_C9	-0.846075	9.66078e-06	0.00614926
Q8BTS0_DDX5	A0A0R4J032_C9	-0.82189	2.86419e-05	0.00992501
O35381_ANP32A	A0A0R4J032_C9	-0.824987	2.51511e-05	0.0094547
Q9Z1N5_DDX39B	A0A0R4J032_C9	-0.849768	8.05302e-06	0.0056813
Q99K48_NONO	A0A0R4J032_C9	-0.844883	1.02352e-05	0.00628758
Q9DCX2_ATP5H	Q9DBJ1_PGAM1	-0.875905	1.90234e-06	0.00289618
P45952_ACADM	Q9DBJ1_PGAM1	-0.856403	5.73517e-06	0.00485979
Q8BMF3_ME3	Q9DBJ1_PGAM1	-0.823165	2.71578e-05	0.00981407
Q9DCZ4-3_APOO	Q9DBJ1_PGAM1	-0.842732	1.1346e-05	0.00660456
Q9WV55_VAPA	Q8C7H1_MMAA	-0.83015	2.01385e-05	0.00851357
Q3TLP8_RAC1	Q8C7H1_MMAA	-0.833247	1.7562e-05	0.00810038
Q9QUI0_RHOA	Q8C7H1_MMAA	-0.874548	2.06605e-06	0.00304692
P62196_PSMC5	Q9JMG7-2_HDGFL3	-0.83841	1.38926e-05	0.00722125
E9Q7L0_OGDHL	Q9ES83_BVES	-0.82189	2.86419e-05	0.00992501
Q9R1P3_PSMB2	Q9ES83_BVES	-0.830753	1.96126e-05	0.00842172
D3Z316_1700021F05RIK	Q8BFY9_TNPO1	-0.841508	1.2023e-05	0.00682881
O08532_CACNA2D1	Q9DC77_SMPX	-0.841073	1.22714e-05	0.00682881
P07310_CKM	B2RXS4_PLXNB2	-0.826873	2.32086e-05	0.00910461
J3QQ13_TNNT2	B2RXS4_PLXNB2	-0.877646	1.70878e-06	0.00274659
A0A087WSN6_FN1	A0A2C9F2D2_ANXA7	-0.84254	1.14497e-05	0.00660456
P39054_DNM2	Q3TMH2_SCRN3	-0.826625	2.34566e-05	0.00910461
Q9DCN2_CYB5R3	Q3TMH2_SCRN3	-0.826625	2.34566e-05	0.00910461
Q7TMB8_CYFIP1	Q3TMH2_SCRN3	-0.861713	4.31768e-06	0.00423258
Q61033_TMPO	Q3TMH2_SCRN3	-0.847265	9.11495e-06	0.0059435
G5E829_ATP2B1	Q3TMH2_SCRN3	-0.909185	1.74407e-07	0.000897378
Q61941_NNT	Q8R010_AIMP2	-0.884417	1.10792e-06	0.00223022
G5E902_SLC25A3	Q8R010_AIMP2	-0.830579	1.97634e-05	0.00845208
Q6PIE5_ATP1A2	Q8R010_AIMP2	-0.851393	7.42169e-06	0.00542195
P63094_GNAS	Q8R010_AIMP2	-0.855521	6.00563e-06	0.00491959
P19221_F2	P82350_SGCA	-0.869386	2.80476e-06	0.00346072
E9Q3Y4_LRBA	D3YZD8_AAMDC	-0.822314	2.81405e-05	0.00984889
E9PWR4_DIP2C	Q9CZR8_TSFM	-0.830579	1.97638e-05	0.00845208
Q9WTI7_MYO1C	Q91V16_ETFRF1	-0.839277	1.33455e-05	0.00714022
Q9R0P5_DSTN	Q91V16_ETFRF1	-0.845201	1.0079e-05	0.00622501
Q8BH61_F13A1	Q91V16_ETFRF1	-0.878225	1.64827e-06	0.00269898
P62737_ACTA2	Q8VHM5_HNRNPR	-0.894166	5.65121e-07	0.00162628
P19123_TNNC1	Q8VHM5_HNRNPR	-0.902993	2.89752e-07	0.00117336
O70250_PGAM2	Q8VHM5_HNRNPR	-0.872033	2.40176e-06	0.00323667
P47757-4_CAPZB	Q8VHM5_HNRNPR	-0.829117	2.10662e-05	0.00876563
P61082_UBE2M	Q8VHM5_HNRNPR	-0.824987	2.51511e-05	0.0094547
Q9WTI7_MYO1C	Q6XPS7_THA1	-0.835574	1.58168e-05	0.00775832
P63028_TPT1	Q3UHJ0_AAK1	-0.833161	1.76297e-05	0.00810038
Q9CQA3_SDHB	E9QKR1_ENAH	-0.828689	2.14612e-05	0.00876563
O70250_PGAM2	H9KV00_SON	-0.875581	1.94043e-06	0.00291782
Q3UIK0_MYBPC3	P61161_ACTR2	-0.838843	1.36169e-05	0.00716672
Q62234_MYOM1	P61161_ACTR2	-0.855372	6.05232e-06	0.00493275
Q9JJW5_MYOZ2	P61161_ACTR2	-0.830491	1.98397e-05	0.0084792
Q6P3A8_BCKDHB	P61161_ACTR2	-0.825142	2.49862e-05	0.0094547
A0A0R4J032_C9	H3BLL2_ATPAF1	-0.848141	8.73047e-06	0.00588562
J3QQ13_TNNT2	Q8CGB6-3_TNS2	-0.881776	1.31599e-06	0.00242153
A0A0R4J023_AUH	Q8CGB6-3_TNS2	-0.824987	2.51511e-05	0.0094547
P08226_APOE	Q8K1H7_TCP11L2	-0.839009	1.35127e-05	0.00714022
Q8QZR5_GPT	Q8K1H7_TCP11L2	-0.888545	8.39466e-07	0.00195059
Q8R010_AIMP2	Q8K1H7_TCP11L2	-0.882353	1.26787e-06	0.00237858
A0A1W2P768_HIST2H3C1	Q9CR98_FAM136A	-0.854633	6.28893e-06	0.00505236
Q8CCK0_H2AFY2	Q9CR98_FAM136A	-0.844286	1.05334e-05	0.00639655
Q61646_HP	O89079_COPE	-0.849768	8.05302e-06	0.0056813
P14152_MDH1	A2A5R2_ARFGEF2	-0.835312	1.60056e-05	0.00778112
P01029_C4B	P56959_FUS	-0.832817	1.79019e-05	0.00810038
Q61646_HP	P56959_FUS	-0.925697	3.69363e-08	0.000385323
Q5EBG6_HSPB6	P56959_FUS	-0.826625	2.34566e-05	0.00910461
E9PVD2_ITIH4	P56959_FUS	-0.849329	8.23106e-06	0.0056813
A0A0R4J032_C9	P56959_FUS	-0.861713	4.31768e-06	0.00423258
P48774_GSTM5	Q5DTJ9_MYPN	-0.862158	4.21396e-06	0.00423258
P60710_ACTB	Q9JK48_SH3GLB1	-0.916882	8.80323e-08	0.000624955
P18760_CFL1	Q9JK48_SH3GLB1	-0.862603	4.11232e-06	0.00419437
P62962_PFN1	Q9JK48_SH3GLB1	-0.855888	5.89173e-06	0.00491959
P40124_CAP1	Q9JK48_SH3GLB1	-0.840475	1.26206e-05	0.00691676
Q9R1P4_PSMA1	Q5I1X5_PPP1R13L	-0.859505	4.86559e-06	0.00447006
A0A0R4J083_ACADL	Q9CQW2_ARL8B	-0.832817	1.79019e-05	0.00810038
P20108_PRDX3	Q9CQW2_ARL8B	-0.832817	1.79019e-05	0.00810038
Q8K010_OPLAH	Q5U458_DNAJC11	-0.822497	2.79262e-05	0.00981518
P62737_ACTA2	Q9WV02_RBMX	-0.876613	1.82143e-06	0.0028702
Q9JI91_ACTN2	Q9WV02_RBMX	-0.859949	4.7507e-06	0.00445541
Q62234_MYOM1	Q9WV02_RBMX	-0.822497	2.79262e-05	0.00981518
P19123_TNNC1	Q9WV02_RBMX	-0.822497	2.79262e-05	0.00981518
O70250_PGAM2	Q9WV02_RBMX	-0.888545	8.39466e-07	0.00195059
P09411_PGK1	Q9WV02_RBMX	-0.838843	1.36169e-05	0.00716672
Q61646_HP	Q9WV02_RBMX	-0.824561	2.56082e-05	0.0094547
A0A0R4J093_CMPK1	Q9WV02_RBMX	-0.828085	2.20301e-05	0.0088575
Q8R086_SUOX	Q9WV02_RBMX	-0.853898	6.53199e-06	0.00516327
Q9WVQ5_APIP	Q9WV02_RBMX	-0.861713	4.31768e-06	0.00423258
P19001_KRT19	Q8VDQ1_PTGR2	-0.862604	4.11222e-06	0.00419437
P97927_LAMA4	P62082_RPS7	-0.839009	1.35127e-05	0.00714022
Q99KC8_VWA5A	P62082_RPS7	-0.841073	1.22714e-05	0.00682881
O35855_BCAT2	Q9CQ19_MYL9	-0.826625	2.34566e-05	0.00910461
Q8CG76_AKR7A2	Q9CQ19_MYL9	-0.827052	2.30314e-05	0.00910461
Q6P069_SRI	E9PV66_MYO18B	-0.843847	1.07576e-05	0.00650383
Q61739_ITGA6	Q6ZWY3_RPS27L	-0.853457	6.68154e-06	0.00516327
P20065_TMSB4X	Q6ZWY3_RPS27L	-0.851393	7.42169e-06	0.00542195
P14152_MDH1	Q922Q1_MARC2	-0.823347	2.69511e-05	0.00974759
Q8VIJ6_SFPQ	Q5XPI3-2_RNF123	-0.86615	3.37518e-06	0.0038229
Q9CXJ4_ABCB8	O35215_DDT	-0.823955	2.62719e-05	0.00956106
E9PV22_LRRC47	O35215_DDT	-0.855963	5.86885e-06	0.00491708
Q9EQP2_EHD4	Q14C51_PTCD3	-0.887971	8.73029e-07	0.00198238
Q00623_APOA1	H7BX95_SRSF1	-0.892101	6.55184e-07	0.00174055
P21614_GC	H7BX95_SRSF1	-0.885906	1.00361e-06	0.00212762
Q64514_TPP2	H7BX95_SRSF1	-0.852714	6.94032e-06	0.00526104
B8JJN0_GM20547	H7BX95_SRSF1	-0.884874	1.07498e-06	0.00222584
Q8QZR5_GPT	H7BX95_SRSF1	-0.845201	1.0079e-05	0.00622501
P19221_F2	H7BX95_SRSF1	-0.907589	1.99451e-07	0.000982055
Q9DBD0_ICA	H7BX95_SRSF1	-0.880744	1.40604e-06	0.00253446
E9PV22_LRRC47	P35505_FAH	-0.855521	6.00563e-06	0.00491959
P23953_CES1C	Q9EQI8_MRPL46	-0.841073	1.22714e-05	0.00682881
P17427_AP2A2	P61971_NUTF2	-0.85124	7.47927e-06	0.00544089
Q9R1P3_PSMB2	Q9D379_EPHX1	-0.874097	2.12313e-06	0.003049
Q6XPS7_THA1	Q9D379_EPHX1	-0.836345	1.52727e-05	0.00754118
Q3UMT1_PPP1R12C	P62889_RPL30	-0.852196	7.12567e-06	0.00537197
Q6P5F9_XPO1	P62889_RPL30	-0.827052	2.30314e-05	0.00910461
O08917_FLOT1	P62889_RPL30	-0.829545	2.06772e-05	0.00868838
H3BLL2_ATPAF1	P62889_RPL30	-0.830491	1.98397e-05	0.0084792
Q9JLJ2_ALDH9A1	A0A087WRM7_PFKFB2	-0.823773	2.64738e-05	0.00961877
Q8CCJ3_UFL1	A0A087WRM7_PFKFB2	-0.838843	1.36169e-05	0.00716672
Q8R2G4_ART3	O54950_PRKAG1	-0.82189	2.86419e-05	0.00992501
P53702_HCCS	Q9D8Z2_TRIAP1	-0.83428	1.67683e-05	0.00786974
Q91YJ5_MTIF2	E9PVN6_GM20498	-0.827052	2.30314e-05	0.00910461
O35350_CAPN1	P62075_TIMM13	-0.822648	2.77514e-05	0.00981518
P62737_ACTA2	Q6A028_SWAP70	-0.870868	2.57254e-06	0.00336563
P19123_TNNC1	Q6A028_SWAP70	-0.841508	1.2023e-05	0.00682881
Q9D0S9_HINT2	Q6A028_SWAP70	-0.843928	1.07163e-05	0.00648095
P61971_NUTF2	Q6A028_SWAP70	-0.849768	8.05302e-06	0.0056813
G5E829_ATP2B1	Q9CQ60_PGLS	-0.851393	7.42169e-06	0.00542195
Q9CZ13_UQCRC1	Q3U125_FAM213A	-0.823955	2.62719e-05	0.00956106
P47934_CRAT	Q3U125_FAM213A	-0.82189	2.86419e-05	0.00992501
P47738_ALDH2	Q3U125_FAM213A	-0.847703	8.92108e-06	0.0059435
Q60936_COQ8A	Q3U125_FAM213A	-0.842976	1.1215e-05	0.00654726
Q8R164_BPHL	Q3U125_FAM213A	-0.822497	2.79262e-05	0.00981518
G5E895_AKR1B10	Q3U125_FAM213A	-0.874097	2.12313e-06	0.003049
Q544X6_FECH	Q3U125_FAM213A	-0.855963	5.86885e-06	0.00491708
Q8R2Q4_GFM2	Q3U125_FAM213A	-0.826447	2.36365e-05	0.00913928
P97478_COQ7	Q3U125_FAM213A	-0.913313	1.21822e-07	0.000748656
Q8BGC4_ZADH2	Q3U125_FAM213A	-0.836945	1.48599e-05	0.00745234
Q91VA7_IDH3B	Q811D0-3_DLG1	-0.824017	2.62031e-05	0.00956106
Q924M7_MPI	Q811D0-3_DLG1	-0.838678	1.37215e-05	0.00721075
P60670_NPLOC4	Q811D0-3_DLG1	-0.827372	2.27174e-05	0.00907638
P14602_HSPB1	Q3UW66_MPST	-0.84667	9.38437e-06	0.00601553
P14152_MDH1	P09470_ACE	-0.887971	8.73029e-07	0.00198238
Q3TMH2_SCRN3	P09470_ACE	-0.832817	1.79019e-05	0.00810038
P27661_H2AFX	Q52KR3_PRUNE2	-0.874097	2.12313e-06	0.003049
Q9JMG7-2_HDGFL3	Q52KR3_PRUNE2	-0.827052	2.30314e-05	0.00910461
Q91VA7_IDH3B	Q6PIU9_	-0.840827	1.24142e-05	0.00687628
Q9JJW5_MYOZ2	Q6PIU9_	-0.862603	4.11232e-06	0.00419437
Q9JK92_HSPB8	Q6PIU9_	-0.827996	2.21148e-05	0.0088849
Q8CCK0_H2AFY2	A0A1W2P7K6_RAB3IP	-0.926175	3.51314e-08	0.000382931
Q61941_NNT	P10518_ALAD	-0.851393	7.42169e-06	0.00542195
Q99JB8_PACSIN3	P10518_ALAD	-0.888545	8.39466e-07	0.00195059
Q3UMT1_PPP1R12C	P10518_ALAD	-0.829546	2.06768e-05	0.00868838
P63094_GNAS	P10518_ALAD	-0.841073	1.22714e-05	0.00682881
Q8R2G4_ART3	P10518_ALAD	-0.828689	2.14612e-05	0.00876563
E9Q3Y4_LRBA	P10518_ALAD	-0.859061	4.98269e-06	0.00451538
Q8K1H7_TCP11L2	P10518_ALAD	-0.888545	8.39466e-07	0.00195059
H7BX95_SRSF1	P10518_ALAD	-0.859649	4.828e-06	0.00445541
Q811D0-3_DLG1	P10518_ALAD	-0.8242	2.60015e-05	0.00955388
P14733_LMNB1	P68134_ACTA1	-0.826446	2.36369e-05	0.00913928
Q9CPQ1_COX6C	P68134_ACTA1	-0.82584	2.42565e-05	0.00926345
G5E924_HNRNPL	P68134_ACTA1	-0.8508	7.64686e-06	0.0054956
Q58A65_SPAG9	A0A0R4J050_ACY1	-0.893023	6.13548e-07	0.00171429
Q7TMB8_CYFIP1	A0A0R4J050_ACY1	-0.844605	1.03731e-05	0.00631416
P97429_ANXA4	A0A0R4J050_ACY1	-0.868802	2.90111e-06	0.00355256
A0A1L1STC6_SYNE1	A0A0R4J050_ACY1	-0.860537	4.60241e-06	0.00439454
Q8CGB6-3_TNS2	A0A0R4J050_ACY1	-0.825413	2.47006e-05	0.00938355
Q9CQM9_GLRX3	Q99JI6_RAP1B	-0.863191	3.98148e-06	0.00409069
Q6GT24_PRDX6	Q99JI6_RAP1B	-0.83661	1.50893e-05	0.00752605
Q9WVL0_GSTZ1	Q99JI6_RAP1B	-0.852273	7.09795e-06	0.00535587
Q8R404_MIC13	Q08091_CNN1	-0.839009	1.35127e-05	0.00714022
O08528_HK2	O08795-2_PRKCSH	-0.8508	7.64686e-06	0.0054956
P40630_TFAM	O08795-2_PRKCSH	-0.876161	1.87278e-06	0.0028702
A0A0A0MQ68_GCDH	O08795-2_PRKCSH	-0.824561	2.56082e-05	0.0094547
Q149B8_PERM1	O08795-2_PRKCSH	-0.900929	3.40618e-07	0.00127082
Q99M01_FARS2	O08795-2_PRKCSH	-0.827052	2.30314e-05	0.00910461
Q9D6T9_MRPS36	O08795-2_PRKCSH	-0.828689	2.14612e-05	0.00876563
Q06890_CLU	Q9EP89_LACTB	-0.829974	2.02937e-05	0.00856777
Q8BND5_QSOX1	Q9EP89_LACTB	-0.837377	1.45686e-05	0.00745234
A0A0R4J140_CLUH	Q61599_ARHGDIB	-0.822922	2.74351e-05	0.00981518
Q9JK48_SH3GLB1	Q61599_ARHGDIB	-0.848735	8.47753e-06	0.00575689
Q60932_VDAC1	P17879_HSPA1B	-0.84091	1.23661e-05	0.00685276
P52825_CPT2	P17879_HSPA1B	-0.850207	7.87802e-06	0.00561721
Q9QUR6_PREP	P17879_HSPA1B	-0.863191	3.98148e-06	0.00409069
Q3UW66_MPST	P17879_HSPA1B	-0.886481	9.65677e-07	0.00209168
Q9DB20_ATP5O	A0A1Y7VKY1_GM11361	-0.827052	2.30314e-05	0.00910461
Q9EQP2_EHD4	G3X9M0_DAP3	-0.855521	6.00563e-06	0.00491959
P27661_H2AFX	K3W4S6_GYG	-0.845201	1.0079e-05	0.00622501
P62737_ACTA2	Q9CWZ7_NAPG	-0.864223	3.76011e-06	0.00403015
P19123_TNNC1	Q9CWZ7_NAPG	-0.869969	2.7113e-06	0.00341531
Q9CZR8_TSFM	Q9CWZ7_NAPG	-0.859061	4.98269e-06	0.00451538
P99029_PRDX5	Q9CQW1_YKT6	-0.844605	1.03731e-05	0.00631416
Q9ES83_BVES	Q8VCG1_DUT	-0.836945	1.48599e-05	0.00745234
E9Q6R7_UTRN	Q9CZX8_RPS19	-0.839443	1.32436e-05	0.00713867
P97927_LAMA4	Q9CZX8_RPS19	-0.857585	5.38926e-06	0.00468144
Q9JLJ2_ALDH9A1	Q9CZX8_RPS19	-0.867321	3.15826e-06	0.0036745
Q8CCJ3_UFL1	Q9CZX8_RPS19	-0.894737	5.42211e-07	0.0015988
Q7TMB8_CYFIP1	Q9CXU4_GM10273	-0.82189	2.86419e-05	0.00992501
G5E8R4_PPP6R3	Q9CXU4_GM10273	-0.884238	1.12107e-06	0.00224449
Q8CCK0_H2AFY2	Q9CXU4_GM10273	-0.883841	1.15069e-06	0.0022673
P97467_PAM	Q99M04_LIAS	-0.840746	1.24612e-05	0.00689703
Q3U7R1_ESYT1	Q99M04_LIAS	-0.865565	3.4882e-06	0.00386096
Q61425_HADH	O70252_HMOX2	-0.832817	1.79019e-05	0.00810038
Q9D172_D10JHU81E	O70252_HMOX2	-0.898865	3.99024e-07	0.00137617
Q8BMS4_COQ3	O70252_HMOX2	-0.848735	8.47753e-06	0.00575689
Q9JLV5_CUL3	O70252_HMOX2	-0.83841	1.38926e-05	0.00722125
Q8BMS1_HADHA	Q8C845_EFHD2	-0.82438	2.5805e-05	0.00948837
P50544_ACADVL	Q8C845_EFHD2	-0.878616	1.60849e-06	0.00269898
E9Q800_IMMT	Q8C845_EFHD2	-0.848657	8.51047e-06	0.00577573
Q921G7_ETFDH	Q8C845_EFHD2	-0.907494	2.01044e-07	0.000985784
Q8QZT1_ACAT1	Q8C845_EFHD2	-0.94063	6.43675e-09	0.000142417
P45952_ACADM	Q8C845_EFHD2	-0.839982	1.29148e-05	0.00706084
Q9CZ13_UQCRC1	Q8C845_EFHD2	-0.911157	1.47246e-07	0.000824445
A2AKU9_ATP5C1	Q8C845_EFHD2	-0.903926	2.69009e-07	0.00113919
Q6PB66_LRPPRC	Q8C845_EFHD2	-0.831095	1.93202e-05	0.00842172
P52825_CPT2	Q8C845_EFHD2	-0.862016	4.24693e-06	0.00423258
Q91ZA3_PCCA	Q8C845_EFHD2	-0.832215	1.83875e-05	0.00819496
Q99NB1_ACSS1	Q8C845_EFHD2	-0.856405	5.73468e-06	0.00485964
Q9CR68_UQCRFS1	Q8C845_EFHD2	-0.839876	1.29789e-05	0.00706556
Q9D2G2_DLST	Q8C845_EFHD2	-0.887913	8.76484e-07	0.00198907
P47934_CRAT	Q8C845_EFHD2	-0.885331	1.04287e-06	0.00219293
Q9JHI5_IVD	Q8C845_EFHD2	-0.895199	5.24248e-07	0.00159669
O55126_NIPSNAP2	Q8C845_EFHD2	-0.915289	1.01943e-07	0.000679368
P47738_ALDH2	Q8C845_EFHD2	-0.827996	2.21148e-05	0.0088849
Q9Z2Z6_SLC25A20	Q8C845_EFHD2	-0.903409	2.8033e-07	0.00117024
Q9DCM2_GSTK1	Q8C845_EFHD2	-0.821798	2.87518e-05	0.00995752
Q3ULD5_MCCC2	Q8C845_EFHD2	-0.852273	7.09812e-06	0.00535587
O35855_BCAT2	Q8C845_EFHD2	-0.910687	1.53365e-07	0.000840848
Q922B1_MACROD1	Q8C845_EFHD2	-0.856995	5.55954e-06	0.00474786
Q8R164_BPHL	Q8C845_EFHD2	-0.864223	3.76011e-06	0.00403015
Q9DCZ4-3_APOO	Q8C845_EFHD2	-0.927132	3.17455e-08	0.000353962
G5E895_AKR1B10	Q8C845_EFHD2	-0.829117	2.10662e-05	0.00876563
Q99LB2_DHRS4	Q8C845_EFHD2	-0.886939	9.36357e-07	0.00208718
Q8K2C6_SIRT5	Q8C845_EFHD2	-0.847703	8.92108e-06	0.0059435
Q3U3G8_SERHL	Q8C845_EFHD2	-0.82602	2.40713e-05	0.00920404
D3Z316_1700021F05RIK	Q8C845_EFHD2	-0.832215	1.83875e-05	0.00819496
Q91VT4_CBR4	Q8C845_EFHD2	-0.833247	1.7562e-05	0.00810038
Q8BGC4_ZADH2	Q8C845_EFHD2	-0.823955	2.62719e-05	0.00956106
Q91V16_ETFRF1	Q8C845_EFHD2	-0.85493	6.1928e-06	0.00498677
P50462_CSRP3	Q3TUQ5_PNN	-0.826446	2.36369e-05	0.00913928
P29699_AHSG	F8VQ75_KIF13A	-0.842813	1.1302e-05	0.00658891
Q91ZJ5_UGP2	Q9ESZ8_GTF2I	-0.855521	6.00563e-06	0.00491959
P21981_TGM2	Q9ESZ8_GTF2I	-0.853457	6.68154e-06	0.00516327
Q91X72_HPX	Q9ESZ8_GTF2I	-0.865841	3.43451e-06	0.0038229
Q61646_HP	Q9ESZ8_GTF2I	-0.826625	2.34566e-05	0.00910461
Q9Z2M7_PMM2	Q9ESZ8_GTF2I	-0.824561	2.56082e-05	0.0094547
Q3UIK0_MYBPC3	P97449_ANPEP	-0.890609	7.27747e-07	0.00182928
P07310_CKM	P97449_ANPEP	-0.889463	7.88054e-07	0.00191711
Q62234_MYOM1	P97449_ANPEP	-0.824561	2.56082e-05	0.0094547
P14152_MDH1	P97449_ANPEP	-0.891069	7.04682e-07	0.00182928
Q6P3A8_BCKDHB	P97449_ANPEP	-0.851681	7.31459e-06	0.00542195
Q3TMH2_SCRN3	P97449_ANPEP	-0.841073	1.22714e-05	0.00682881
Q9CQ60_PGLS	P97449_ANPEP	-0.834881	1.63204e-05	0.00778112
A2AVJ7_RRBP1	Q60692_PSMB6	-0.857438	5.43132e-06	0.00469621
Q60597_OGDH	G5E898_PPL	-0.82189	2.86419e-05	0.00992501
Q8R5L1_C1QBP	G5E898_PPL	-0.822922	2.74351e-05	0.00981518
P40630_TFAM	G5E898_PPL	-0.83428	1.67683e-05	0.00786974
Q6P3A8_BCKDHB	G5E898_PPL	-0.884695	1.08773e-06	0.00223022
O88441_MTX2	G5E898_PPL	-0.859948	4.75093e-06	0.00445541
Q9CR98_FAM136A	G5E898_PPL	-0.871637	2.45861e-06	0.00327866
Q9CXU4_GM10273	G5E898_PPL	-0.855372	6.05246e-06	0.00493275
Q8CCJ3_UFL1	Q8BUY5_TIMMDC1	-0.892673	6.29098e-07	0.00171429
Q8BZF8_PGM5	E9QM77_ATXN2	-0.828513	2.1626e-05	0.0087973
P24369_PPIB	E9QM77_ATXN2	-0.834711	1.6446e-05	0.00781365
P28654_DCN	E9QM77_ATXN2	-0.823348	2.69506e-05	0.00974759
O55222_ILK	E9QM77_ATXN2	-0.85124	7.47927e-06	0.00544089
Q9JJ28_FLII	E9QM77_ATXN2	-0.845042	1.01569e-05	0.00624874
Q6ZWQ9_MYL12A	E9QM77_ATXN2	-0.85124	7.47927e-06	0.00544089
Q62234_MYOM1	A2AH25_ARHGAP1	-0.855521	6.00563e-06	0.00491959
Q8K0D5_GFM1	A2AH25_ARHGAP1	-0.855521	6.00563e-06	0.00491959
Q8R5L1_C1QBP	A2AH25_ARHGAP1	-0.822497	2.79262e-05	0.00981518
Q6P3A8_BCKDHB	A2AH25_ARHGAP1	-0.935402	1.24352e-08	0.000208902
Q8K0Z7_TACO1	A2AH25_ARHGAP1	-0.823955	2.62719e-05	0.00956106
Q8VE38_OXNAD1	A2AH25_ARHGAP1	-0.845201	1.0079e-05	0.00622501
E9QM77_ATXN2	A2AH25_ARHGAP1	-0.88843	8.46084e-07	0.00195523
P62737_ACTA2	A0A0J9YUD5_NUP205	-0.822922	2.74351e-05	0.00981518
Q3UIK0_MYBPC3	A0A0J9YUD5_NUP205	-0.830753	1.96126e-05	0.00842172
P07310_CKM	A0A0J9YUD5_NUP205	-0.846075	9.66078e-06	0.00614926
P17182_ENO1	A0A0J9YUD5_NUP205	-0.822922	2.74351e-05	0.00981518
O70250_PGAM2	A0A0J9YUD5_NUP205	-0.915377	1.01133e-07	0.000676287
P09411_PGK1	A0A0J9YUD5_NUP205	-0.838843	1.36169e-05	0.00716672
P47757-4_CAPZB	A0A0J9YUD5_NUP205	-0.851833	7.2584e-06	0.00541924
G5E8R4_PPP6R3	Q8BHG2-3_	-0.841344	1.21162e-05	0.00682881
G5E829_ATP2B1	Q8BHG2-3_	-0.873516	2.19861e-06	0.00309791
Q8CCK0_H2AFY2	Q8BHG2-3_	-0.831182	1.9246e-05	0.00842172
P01027_C3	Q7TQG1_PLEKHA6	-0.82602	2.40713e-05	0.00920404
A0A087WSN6_FN1	Q7TQG1_PLEKHA6	-0.83781	1.42822e-05	0.00737789
E9PVD2_ITIH4	Q7TQG1_PLEKHA6	-0.82602	2.40713e-05	0.00920404
Q62234_MYOM1	A2AS98_NCKAP1	-0.890036	7.57373e-07	0.00186192
Q60597_OGDH	A2AS98_NCKAP1	-0.866288	3.34893e-06	0.00381948
A6ZI44_ALDOA	A2AS98_NCKAP1	-0.853898	6.53199e-06	0.00516327
B7ZCI2_NEBL	A2AS98_NCKAP1	-0.851833	7.2584e-06	0.00541924
Q8BFR5_TUFM	A2AS98_NCKAP1	-0.825323	2.47953e-05	0.00941401
Q8QZS1_HIBCH	A2AS98_NCKAP1	-0.832215	1.83875e-05	0.00819496
P45376_AKR1B1	A2AS98_NCKAP1	-0.845041	1.01572e-05	0.00624874
Q8K0D5_GFM1	A2AS98_NCKAP1	-0.877646	1.70878e-06	0.00274659
A2AMM0_CAVIN4	A2AS98_NCKAP1	-0.833678	1.72274e-05	0.00803092
P70296_PEBP1	A2AS98_NCKAP1	-0.854339	6.38523e-06	0.00510551
P85094_ISOC2A	A2AS98_NCKAP1	-0.826357	2.37276e-05	0.00917069
O09131_GSTO1	A2AS98_NCKAP1	-0.855372	6.05246e-06	0.00493275
Q6P3A8_BCKDHB	A2AS98_NCKAP1	-0.907446	2.0184e-07	0.000985784
Q8CG76_AKR7A2	A2AS98_NCKAP1	-0.828512	2.16264e-05	0.0087973
P28474_ADH5	A2AS98_NCKAP1	-0.83841	1.38926e-05	0.00722125
O88441_MTX2	A2AS98_NCKAP1	-0.860982	4.49286e-06	0.00431591
Q3TMH2_SCRN3	A2AS98_NCKAP1	-0.868353	2.977e-06	0.00361447
Q9CR98_FAM136A	A2AS98_NCKAP1	-0.855074	6.14676e-06	0.00498677
Q9CXU4_GM10273	A2AS98_NCKAP1	-0.834711	1.64464e-05	0.00781365
Q99M04_LIAS	A2AS98_NCKAP1	-0.829799	2.04495e-05	0.00862745
Q9Z0U1_TJP2	B1AR13_CISD3	-0.854339	6.38523e-06	0.00510551
Q9JI91_ACTN2	Q99JX4_EIF3M	-0.823774	2.64728e-05	0.00961877
Q9JIF9_MYOT	Q99JX4_EIF3M	-0.824987	2.51511e-05	0.0094547
P35385_HSPB7	Q99JX4_EIF3M	-0.828689	2.14612e-05	0.00876563
Q9CZR8_TSFM	Q99JX4_EIF3M	-0.82602	2.40713e-05	0.00920404
Q921G7_ETFDH	Q3UJU9_RMDN3	-0.880166	1.45871e-06	0.00254113
P16125_LDHB	Q3UJU9_RMDN3	-0.830753	1.96126e-05	0.00842172
Q61425_HADH	Q3UJU9_RMDN3	-0.863777	3.85441e-06	0.00403015
Q9DB77_UQCRC2	Q3UJU9_RMDN3	-0.841073	1.22714e-05	0.00682881
Q9D2G2_DLST	Q3UJU9_RMDN3	-0.875581	1.94043e-06	0.00291782
Q3ULD5_MCCC2	Q3UJU9_RMDN3	-0.841508	1.2023e-05	0.00682881
Q9CXI0_COQ5	Q3UJU9_RMDN3	-0.82602	2.40713e-05	0.00920404
A0A140LIU4_COX7A1	Q3UJU9_RMDN3	-0.880289	1.44734e-06	0.00253459
D3Z316_1700021F05RIK	Q3UJU9_RMDN3	-0.869969	2.7113e-06	0.00341531
P05125_NPPA	Q9D1B9_MRPL28	-0.845638	9.86813e-06	0.00621674
P62737_ACTA2	Q8CJG0_AGO2	-0.863191	3.98148e-06	0.00409069
O70250_PGAM2	Q8CJG0_AGO2	-0.929825	2.36926e-08	0.000297433
P47757-4_CAPZB	Q8CJG0_AGO2	-0.843573	1.09e-05	0.00652285
P35385_HSPB7	Q8CJG0_AGO2	-0.861713	4.31768e-06	0.00423258
A0A0R4J093_CMPK1	Q8CJG0_AGO2	-0.843573	1.09e-05	0.00652285
Q8R086_SUOX	Q8CJG0_AGO2	-0.852865	6.88698e-06	0.00522979
P61082_UBE2M	Q8CJG0_AGO2	-0.862158	4.21396e-06	0.00423258
P62737_ACTA2	P28658_ATXN10	-0.847107	9.18574e-06	0.00595993
Q9JI91_ACTN2	P28658_ATXN10	-0.827818	2.22847e-05	0.0089418
Q62234_MYOM1	Q3UID0_SMARCC2	-0.835312	1.60056e-05	0.00778112
P09411_PGK1	Q3UID0_SMARCC2	-0.834109	1.68978e-05	0.00791595
Q9JJW5_MYOZ2	Q3UID0_SMARCC2	-0.850207	7.8782e-06	0.00561721
Q9QYJ0_DNAJA2	Q3UID0_SMARCC2	-0.825413	2.47006e-05	0.00938355
Q62234_MYOM1	Q8BYA0_TBCD	-0.865256	3.5494e-06	0.00387726
B7ZCI2_NEBL	Q8BYA0_TBCD	-0.835312	1.60056e-05	0.00778112
A2AMM0_CAVIN4	Q8BYA0_TBCD	-0.849174	8.29505e-06	0.0057037
Q62234_MYOM1	D4AFX7_DNAJC13	-0.829371	2.0835e-05	0.00874922
P27661_H2AFX	A0A087WNT1_ELOC	-0.830753	1.96126e-05	0.00842172
O08917_FLOT1	A0A087WNT1_ELOC	-0.872483	2.33843e-06	0.0032311
A0A1W2P768_HIST2H3C1	A0A087WNT1_ELOC	-0.849329	8.23106e-06	0.0056813
Q922U2_KRT5	P54823_DDX6	-0.834881	1.63204e-05	0.00778112
P04104_KRT1	P54823_DDX6	-0.863777	3.85441e-06	0.00403015
Q3TTY5_KRT2	P54823_DDX6	-0.824561	2.56082e-05	0.0094547
Q8VIJ6_SFPQ	Q9JI75_NQO2	-0.880165	1.45875e-06	0.00254113
Q3U0V1_KHSRP	Q9JI75_NQO2	-0.822314	2.81405e-05	0.00984889
Q8K4Z5_SF3A1	Q9JI75_NQO2	-0.82602	2.40713e-05	0.00920404
Q61033_TMPO	Q9JI75_NQO2	-0.829117	2.10662e-05	0.00876563
P97742_CPT1A	Q8VC30_TKFC	-0.862158	4.21396e-06	0.00423258
G5E829_ATP2B1	Q8VC30_TKFC	-0.83841	1.38926e-05	0.00722125
E9QMK9_DGLUCY	Q3U186_RARS2	-0.850569	7.73621e-06	0.00554763
Q8K010_OPLAH	Q3U186_RARS2	-0.855815	5.91436e-06	0.00491959
Q9CXJ4_ABCB8	O70194_EIF3D	-0.839009	1.35127e-05	0.00714022
G5E8J6_HRC	P54869_HMGCS2	-0.826625	2.34566e-05	0.00910461
Q924M7_MPI	Q8VHY0_CSPG4	-0.851393	7.42169e-06	0.00542195
K3W4R5_CKAP5	Q9Z1A1_TFG	-0.827729	2.23708e-05	0.00897361
P43883_PLIN2	Q8BH35_C8B	-0.915377	1.01133e-07	0.000676287
Q8BVZ1_PLIN5	Q8BH35_C8B	-0.836345	1.52727e-05	0.00754118
A6ZI44_ALDOA	Q9D1D4_TMED10	-0.859649	4.828e-06	0.00445541
P14152_MDH1	Q9D1D4_TMED10	-0.870418	2.64116e-06	0.00341531
Q9D172_D10JHU81E	Q9D1D4_TMED10	-0.888545	8.39466e-07	0.00195059
P85094_ISOC2A	Q9D1D4_TMED10	-0.825414	2.47002e-05	0.00938355
Q6P3A8_BCKDHB	Q9D1D4_TMED10	-0.859949	4.7507e-06	0.00445541
Q8BMS4_COQ3	Q9D1D4_TMED10	-0.84254	1.14497e-05	0.00660456
Q3TMH2_SCRN3	Q9D1D4_TMED10	-0.863777	3.85441e-06	0.00403015
A0A087WRM7_PFKFB2	Q9WUM3_CORO1B	-0.898656	4.05399e-07	0.00138891
Q9WU79_PRODH	Q8BTI8_SRRM2	-0.880682	1.41158e-06	0.00253459
P62737_ACTA2	P63325_RPS10	-0.838843	1.36172e-05	0.00716672
P19123_TNNC1	P63325_RPS10	-0.909654	1.67577e-07	0.000896334
E9QP99_GOLGA3	P63325_RPS10	-0.828941	2.12284e-05	0.00876563
Q9R0P5_DSTN	Q9DCN1_NUDT12	-0.824561	2.56082e-05	0.0094547
Q6P069_SRI	Q9DCN1_NUDT12	-0.82274	2.76448e-05	0.00981518
J3QQ13_TNNT2	Q9ER00_STX12	-0.871451	2.48583e-06	0.00327866
Q924M7_MPI	Q9ER00_STX12	-0.894166	5.65121e-07	0.00162628
A0A0R4J023_AUH	Q9ER00_STX12	-0.8508	7.64686e-06	0.0054956
P61089_UBE2N	Q9ER00_STX12	-0.867321	3.15826e-06	0.0036745
Q6P3A8_BCKDHB	Q9ER00_STX12	-0.83454	1.65731e-05	0.00786371
Q8R010_AIMP2	Q9ER00_STX12	-0.840475	1.26206e-05	0.00691676
Q8BH61_F13A1	Q9CZL5_PCBD2	-0.83015	2.01385e-05	0.00851357
Q8C845_EFHD2	Q9CZL5_PCBD2	-0.840909	1.23664e-05	0.00685276
Q99M01_FARS2	Q91YW3_DNAJC3	-0.842459	1.14941e-05	0.00662695
Q7TNS2_MINOS1	Q9QZE5_COPG1	-0.8508	7.64686e-06	0.0054956
Q9Z2I9_SUCLA2	P61027_RAB10	-0.835057	1.61915e-05	0.00778112
Q60936_COQ8A	P61027_RAB10	-0.83454	1.65735e-05	0.00786371
Q8C7H1_MMAA	P61027_RAB10	-0.831525	1.89577e-05	0.00838731
P48962_SLC25A4	Q8K157_GALM	-0.848735	8.47753e-06	0.00575689
F8VQN6_ARHGEF12	Q9D6K8_FUNDC2	-0.824806	2.53444e-05	0.0094547
Q921H8_ACAA1A	P34022_RANBP1	-0.82602	2.40713e-05	0.00920404
Q9DCZ4-3_APOO	P34022_RANBP1	-0.841861	1.18243e-05	0.00677216
F7A8H6_GPX4	P34022_RANBP1	-0.829974	2.02937e-05	0.00856777
Q920Q6_MSI2	Q3U3V1_F10	-0.864223	3.76011e-06	0.00403015
P62631_EEF1A2	P62071_RRAS2	-0.855224	6.09912e-06	0.00496344
Q6XPS7_THA1	P62071_RRAS2	-0.831869	1.86717e-05	0.00830293
O35855_BCAT2	P51863_ATP6V0D1	-0.823955	2.62719e-05	0.00956106
P40630_TFAM	P51863_ATP6V0D1	-0.835312	1.60056e-05	0.00778112
Q6P3A8_BCKDHB	P51863_ATP6V0D1	-0.823682	2.6575e-05	0.00965348
Q8CG76_AKR7A2	P51863_ATP6V0D1	-0.852273	7.09812e-06	0.00535587
E9QM77_ATXN2	P51863_ATP6V0D1	-0.850129	7.90876e-06	0.00563693
P14152_MDH1	Q61830_MRC1	-0.898296	4.16551e-07	0.00140667
Q9D172_D10JHU81E	Q61830_MRC1	-0.847265	9.11495e-06	0.0059435
Q6P3A8_BCKDHB	Q61830_MRC1	-0.851681	7.31459e-06	0.00542195
Q9WTI7_MYO1C	Q921H9_COA7	-0.827908	2.21988e-05	0.00890888
Q8BH61_F13A1	Q921H9_COA7	-0.855521	6.00563e-06	0.00491959
Q8C845_EFHD2	Q921H9_COA7	-0.865256	3.5494e-06	0.00387726
Q62165_DAG1	Q8CHP8_PGP	-0.882232	1.27784e-06	0.00238699
Q3U0V1_KHSRP	Q8CHP8_PGP	-0.832215	1.83875e-05	0.00819496
Q9EPU0_UPF1	Q8CHP8_PGP	-0.858472	5.14172e-06	0.00462779
Q8K4Z5_SF3A1	Q8CHP8_PGP	-0.884417	1.10792e-06	0.00223022
P63158_HMGB1	Q8CHP8_PGP	-0.845201	1.0079e-05	0.00622501
Q9CU62_SMC1A	Q8CHP8_PGP	-0.921569	5.61752e-08	0.000485694
Q61187_TSG101	Q8CHP8_PGP	-0.853898	6.53199e-06	0.00516327
A0A087WR45_PROB1	Q8CHP8_PGP	-0.83721	1.46807e-05	0.00745234
Q6PD03_PPP2R5A	Q8CHP8_PGP	-0.84254	1.14497e-05	0.00660456
P18654_RPS6KA3	Q8CHP8_PGP	-0.874097	2.12313e-06	0.003049
Q61033_TMPO	Q8CHP8_PGP	-0.847265	9.11495e-06	0.0059435
E9PWR4_DIP2C	Q8CHP8_PGP	-0.848735	8.47753e-06	0.00575689
Q8VHM5_HNRNPR	Q8CHP8_PGP	-0.874097	2.12313e-06	0.003049
H9KV00_SON	Q8CHP8_PGP	-0.829117	2.10662e-05	0.00876563
O89079_COPE	Q8CHP8_PGP	-0.860093	4.71408e-06	0.00445278
Q9WV02_RBMX	Q8CHP8_PGP	-0.933953	1.47815e-08	0.000230145
A0A0J9YUD5_NUP205	Q8CHP8_PGP	-0.867905	3.05455e-06	0.00362045
P21614_GC	Q3TWW8_SRSF6	-0.82584	2.42565e-05	0.00926345
P08226_APOE	Q3TWW8_SRSF6	-0.842976	1.1215e-05	0.00654726
Q9CQA3_SDHB	Q61335_BCAP31	-0.826625	2.34566e-05	0.00910461
Q9WUR2_ECI2	Q61335_BCAP31	-0.836177	1.53901e-05	0.00758767
A2AKD7_SNTA1	Q61335_BCAP31	-0.834881	1.63204e-05	0.00778112
Q8C0M9_ASRGL1	Q61335_BCAP31	-0.865256	3.5494e-06	0.00387726
D3Z041_ACSL1	A0A0A0MQ90_S100A13	-0.874097	2.12313e-06	0.003049
P14152_MDH1	Q61191_HCFC1	-0.847703	8.92108e-06	0.0059435
F8VPN4_AGL	Q9Z1Q5_CLIC1	-0.836777	1.49747e-05	0.00747811
A0A0R4J140_CLUH	Q9Z1Q5_CLIC1	-0.863636	3.88458e-06	0.00404782
Q9JK48_SH3GLB1	Q9Z1Q5_CLIC1	-0.857438	5.43132e-06	0.00469621
Q6P3A8_BCKDHB	P11087_COL1A1	-0.842813	1.1302e-05	0.00658891
P47809_MAP2K4	O35114_SCARB2	-0.841508	1.2023e-05	0.00682881
Q9JLV5_CUL3	O35114_SCARB2	-0.823955	2.62719e-05	0.00956106
P54823_DDX6	Q8VED5_KRT79	-0.861713	4.31768e-06	0.00423258
Q6GQT9_NOMO1	A0A1B0GRV0_BPNT1	-0.889463	7.88079e-07	0.00191711
Q9WTX6_CUL1	A0A1B0GRV0_BPNT1	-0.837293	1.46249e-05	0.00745234
A0A087WR45_PROB1	A0A1B0GRV0_BPNT1	-0.871769	2.4396e-06	0.00326064
E9PWR4_DIP2C	A0A1B0GRV0_BPNT1	-0.883264	1.19494e-06	0.00233555
Q8VHM5_HNRNPR	A0A1B0GRV0_BPNT1	-0.925142	3.91302e-08	0.000398847
P14131_RPS16	A0A1B0GRV0_BPNT1	-0.824987	2.51511e-05	0.0094547
Q8CJG0_AGO2	A0A1B0GRV0_BPNT1	-0.860093	4.71408e-06	0.00445278
P63325_RPS10	A0A1B0GRV0_BPNT1	-0.859504	4.86571e-06	0.00447006
Q9ERU9_RANBP2	O08997_ATOX1	-0.84254	1.14497e-05	0.00660456
E9QM77_ATXN2	Q9JII6_AKR1A1	-0.872285	2.36609e-06	0.00323667
Q7TSH2_PHKB	Q8K1J6_TRNT1	-0.828424	2.17094e-05	0.008826
Q05816_FABP5	O55028_BCKDK	-0.894737	5.42211e-07	0.0015988
P63028_TPT1	O55028_BCKDK	-0.858028	5.26434e-06	0.00468009
Q8BXK9_CLIC5	O55028_BCKDK	-0.849019	8.35885e-06	0.00573945
Q91ZJ5_UGP2	P97822_ANP32E	-0.896801	4.65886e-07	0.00148646
Q61646_HP	P97822_ANP32E	-0.907121	2.0737e-07	0.000985784
Q5EBG6_HSPB6	P97822_ANP32E	-0.832817	1.79019e-05	0.00810038
A0A0R4J032_C9	P97822_ANP32E	-0.878225	1.64827e-06	0.00269898
P68134_ACTA1	P97822_ANP32E	-0.824987	2.51511e-05	0.0094547
A0A087WNT1_ELOC	Q99MR6_SRRT	-0.838678	1.37215e-05	0.00721075
P62737_ACTA2	Q8C0L8_COG5	-0.827052	2.30314e-05	0.00910461
P19123_TNNC1	Q8C0L8_COG5	-0.849329	8.23106e-06	0.0056813
Q5DTJ9_MYPN	Q8C0L8_COG5	-0.845638	9.86813e-06	0.00621674
A0A0R4J0I6_ACAD11	Q9DCC5_CBX3	-0.841073	1.22714e-05	0.00682881
E9Q3Y4_LRBA	Q64152-2_BTF3	-0.831008	1.93944e-05	0.00842172
Q8CGB6-3_TNS2	Q64152-2_BTF3	-0.821706	2.88618e-05	0.00998363
Q9CPQ1_COX6C	Q3TIV5_ZC3H15	-0.867769	3.07842e-06	0.00363169
Q9CU62_SMC1A	Q3TIV5_ZC3H15	-0.845201	1.0079e-05	0.00622501
P70704_ATP8A1	Q3TIV5_ZC3H15	-0.822497	2.79262e-05	0.00981518
Q61033_TMPO	Q3TIV5_ZC3H15	-0.894737	5.42211e-07	0.0015988
O08917_FLOT1	Q3TIV5_ZC3H15	-0.83841	1.38926e-05	0.00722125
A0A1W2P768_HIST2H3C1	Q3TIV5_ZC3H15	-0.849329	8.23106e-06	0.0056813
Q8CCK0_H2AFY2	Q3TIV5_ZC3H15	-0.880289	1.44734e-06	0.00253459
Q8CC88_VWA8	Q8CDV7_ENTPD1	-0.826697	2.33847e-05	0.00910461
Q9Z2I9_SUCLA2	Q8CDV7_ENTPD1	-0.85707	5.53779e-06	0.00474786
Q61425_HADH	Q8CDV7_ENTPD1	-0.859806	4.7874e-06	0.00445541
Q07417_ACADS	Q8CDV7_ENTPD1	-0.856702	5.64591e-06	0.00480977
E9Q7L0_OGDHL	Q8CDV7_ENTPD1	-0.821948	2.85726e-05	0.00992501
Q9D2G2_DLST	Q8CDV7_ENTPD1	-0.8323	1.83183e-05	0.00819496
P32020_SCP2	Q8CDV7_ENTPD1	-0.836009	1.55079e-05	0.00764365
Q924M7_MPI	Q8CDV7_ENTPD1	-0.885673	1.01936e-06	0.00215398
A0A0R4J023_AUH	Q8CDV7_ENTPD1	-0.854633	6.28893e-06	0.00505236
Q9CXI0_COQ5	Q8CDV7_ENTPD1	-0.874225	2.10675e-06	0.003049
Q8K009_ALDH1L2	O70548_TCAP	-0.839443	1.32436e-05	0.00713867
P62737_ACTA2	Q91VA6_POLDIP2	-0.846074	9.66099e-06	0.00614926
O70250_PGAM2	Q91VA6_POLDIP2	-0.864223	3.76011e-06	0.00403015
P28474_ADH5	Q91VA6_POLDIP2	-0.82602	2.40713e-05	0.00920404
Q8CHP8_PGP	Q91VA6_POLDIP2	-0.873516	2.19861e-06	0.00309791
Q9CXJ4_ABCB8	Q8R3Q6_CCDC58	-0.876161	1.87278e-06	0.0028702
Q9CU62_SMC1A	Q8R3Q6_CCDC58	-0.828689	2.14612e-05	0.00876563
Q61033_TMPO	Q8R3Q6_CCDC58	-0.888545	8.39466e-07	0.00195059
Q8CCK0_H2AFY2	Q8R3Q6_CCDC58	-0.888545	8.39466e-07	0.00195059
P28658_ATXN10	Q8R3Q6_CCDC58	-0.82189	2.86419e-05	0.00992501
P62996_TRA2B	Q9D358_ACP1	-0.827052	2.30314e-05	0.00910461
Q9WTI7_MYO1C	Q9CQV1_PAM16	-0.881076	1.37648e-06	0.00251124
O70400_PDLIM1	S4R2K0_PDF	-0.872033	2.40176e-06	0.00323667
Q9Z0P5_TWF2	S4R2K0_PDF	-0.834881	1.63204e-05	0.00778112
Q3TMX5_MANF	S4R2K0_PDF	-0.836777	1.49744e-05	0.00747811
P50462_CSRP3	A6H8H2-2_DENND4C	-0.925142	3.91302e-08	0.000398847
P62737_ACTA2	P43406_ITGAV	-0.825413	2.47006e-05	0.00938355
Q9JI91_ACTN2	P43406_ITGAV	-0.834023	1.69627e-05	0.0079446
Q9JI75_NQO2	P43406_ITGAV	-0.829545	2.06772e-05	0.00868838
Q91ZJ5_UGP2	P30681_HMGB2	-0.857585	5.38926e-06	0.00468144
Q91X72_HPX	P30681_HMGB2	-0.839009	1.35127e-05	0.00714022
P06684_C5	P30681_HMGB2	-0.892673	6.29098e-07	0.00171429
Q61646_HP	P30681_HMGB2	-0.925697	3.69363e-08	0.000385323
E9PVD2_ITIH4	P30681_HMGB2	-0.841073	1.22714e-05	0.00682881
G3X8T9_SERPINA3N	P30681_HMGB2	-0.863777	3.85441e-06	0.00403015
A0A0R4J032_C9	P30681_HMGB2	-0.855521	6.00563e-06	0.00491959
Q61425_HADH	P97315_CSRP1	-0.836945	1.48599e-05	0.00745234
A2AVJ7_RRBP1	P56380_NUDT2	-0.841508	1.2023e-05	0.00682881
Q9WTX6_CUL1	P56380_NUDT2	-0.844605	1.03731e-05	0.00631416
G5E829_ATP2B1	P56380_NUDT2	-0.830753	1.96126e-05	0.00842172
P06728_APOA4	P56501_UCP3	-0.826625	2.34566e-05	0.00910461
Q60597_OGDH	Q9DCV7_KRT7	-0.839009	1.35127e-05	0.00714022
Q9CQ69_UQCRQ	Q9D1P4_CHORDC1	-0.841345	1.21156e-05	0.00682881
Q6PD03_PPP2R5A	Q9D1P4_CHORDC1	-0.84667	9.38437e-06	0.00601553
Q9ESZ8_GTF2I	Q9D1P4_CHORDC1	-0.859649	4.828e-06	0.00445541
P97822_ANP32E	Q9D1P4_CHORDC1	-0.849329	8.23106e-06	0.0056813
Q3URE1_ACSF3	Q8BGA9_OXA1L	-0.822497	2.79262e-05	0.00981518
Q6P549_INPPL1	Q8BGA9_OXA1L	-0.900929	3.40618e-07	0.00127082
Q61584_FXR1	Q8BGA9_OXA1L	-0.822922	2.74351e-05	0.00981518
Q9JLV5_CUL3	Q8BGA9_OXA1L	-0.828085	2.20301e-05	0.0088575
Q8R010_AIMP2	Q8BGA9_OXA1L	-0.824561	2.56082e-05	0.0094547
Q14BI5_MYOM2	P84091_AP2M1	-0.871451	2.48583e-06	0.00327866
P19123_TNNC1	P84091_AP2M1	-0.826625	2.34566e-05	0.00910461
P14152_MDH1	P84091_AP2M1	-0.832215	1.83875e-05	0.00819496
P20108_PRDX3	P84091_AP2M1	-0.878225	1.64827e-06	0.00269898
Q9D172_D10JHU81E	P84091_AP2M1	-0.847265	9.11495e-06	0.0059435
Q8BMS4_COQ3	P84091_AP2M1	-0.833247	1.7562e-05	0.00810038
E9QP99_GOLGA3	P84091_AP2M1	-0.858472	5.14172e-06	0.00462779
A0A1B0GRV0_BPNT1	P84091_AP2M1	-0.84254	1.14497e-05	0.00660456
Q00623_APOA1	E9PYH2_ACOT7	-0.851833	7.2584e-06	0.00541924
P06728_APOA4	E9PYH2_ACOT7	-0.843137	1.1129e-05	0.00652285
P21614_GC	E9PYH2_ACOT7	-0.845638	9.86813e-06	0.00621674
Q03734_SERPINA3M	E9PYH2_ACOT7	-0.892673	6.29098e-07	0.00171429
E9Q9C1_ABLIM1	P28843_DPP4	-0.866288	3.34893e-06	0.00381948
Q8BVQ9_PSMC2	P28843_DPP4	-0.892101	6.55184e-07	0.00174055
P97807_FH	E9Q6D8_C6	-0.822497	2.79262e-05	0.00981518
Q922B1_MACROD1	E9Q6D8_C6	-0.834881	1.63204e-05	0.00778112
P97478_COQ7	E9Q6D8_C6	-0.841073	1.22714e-05	0.00682881
Q91YP2_NLN	E9Q6D8_C6	-0.881776	1.31599e-06	0.00242153
Q9D7X8_GGCT	E9Q6D8_C6	-0.832817	1.79019e-05	0.00810038
Q9DAT5_TRMU	E9Q6D8_C6	-0.845201	1.0079e-05	0.00622501
P43883_PLIN2	E9Q6D8_C6	-0.834881	1.63204e-05	0.00778112
Q9DAK9_PHPT1	P97390_VPS45	-0.839443	1.32436e-05	0.00713867
Q80X50-2_UBAP2L	P97390_VPS45	-0.824987	2.51511e-05	0.0094547
Q5SXR6_CLTC	A0A0R4J137_PHYHD1	-0.83841	1.38926e-05	0.00722125
Q9DBR7_PPP1R12A	A0A0R4J137_PHYHD1	-0.840475	1.26206e-05	0.00691676
O88322_NID2	A0A0R4J137_PHYHD1	-0.875581	1.94043e-06	0.00291782
P70168_KPNB1	A0A0R4J137_PHYHD1	-0.876613	1.82143e-06	0.0028702
Q3TLP8_RAC1	A0A0R4J137_PHYHD1	-0.83015	2.01385e-05	0.00851357
P28653_BGN	A0A0R4J137_PHYHD1	-0.833678	1.72274e-05	0.00803092
Q8CDV7_ENTPD1	A0A0R4J137_PHYHD1	-0.856627	5.66825e-06	0.00482807
P97315_CSRP1	A0A0R4J137_PHYHD1	-0.836345	1.52727e-05	0.00754118
Q3UZG4_AIMP1	P03930_MTATP8	-0.855521	6.00563e-06	0.00491959
Q9CZ13_UQCRC1	E9QPX1_COL18A1	-0.831182	1.9246e-05	0.00842172
A2AKU9_ATP5C1	E9QPX1_COL18A1	-0.829117	2.10662e-05	0.00876563
Q3UIK0_MYBPC3	I1E4X5_9030624J02RIK	-0.858028	5.26434e-06	0.00468009
Q62234_MYOM1	I1E4X5_9030624J02RIK	-0.824987	2.51511e-05	0.0094547
Q6P3A8_BCKDHB	I1E4X5_9030624J02RIK	-0.867632	3.10258e-06	0.00365437
P52503_NDUFS6	I1E4X5_9030624J02RIK	-0.825413	2.47006e-05	0.00938355
O88441_MTX2	I1E4X5_9030624J02RIK	-0.827907	2.21997e-05	0.00890888
J3QPG5_PSAP	I1E4X5_9030624J02RIK	-0.863191	3.98148e-06	0.00409069
J3QQ13_TNNT2	Q9R1C7_PRPF40A	-0.824381	2.58045e-05	0.00948837
Q91VA7_IDH3B	Q9R1C7_PRPF40A	-0.833506	1.73605e-05	0.00808545
P45376_AKR1B1	Q9R1C7_PRPF40A	-0.841861	1.18243e-05	0.00677216
Q924M7_MPI	Q9R1C7_PRPF40A	-0.856405	5.73454e-06	0.00485964
Q61584_FXR1	Q9R1C7_PRPF40A	-0.891473	6.84934e-07	0.00180387
Q8R010_AIMP2	Q9R1C7_PRPF40A	-0.876034	1.88747e-06	0.00287861
P62889_RPL30	Q9R1C7_PRPF40A	-0.883721	1.15978e-06	0.00228204
P45376_AKR1B1	P31428_DPEP1	-0.824987	2.51511e-05	0.0094547
Q6P3A8_BCKDHB	P31428_DPEP1	-0.833076	1.76968e-05	0.00810038
A0A1W2P7K6_RAB3IP	P31428_DPEP1	-0.856995	5.55954e-06	0.00474786
O70250_PGAM2	P82348_SGCG	-0.845201	1.0079e-05	0.00622501
F8WIA1_CLIP1	P29788_VTN	-0.873516	2.19861e-06	0.00309791
P43883_PLIN2	P29788_VTN	-0.836345	1.52727e-05	0.00754118
Q8R3V5_SH3GLB2	P29788_VTN	-0.857881	5.30545e-06	0.00468144
Q91VA7_IDH3B	Q3UMA3_HGS	-0.836777	1.49744e-05	0.00747811
P97443_SMYD1	Q3UMA3_HGS	-0.851833	7.2584e-06	0.00541924
Q149B8_PERM1	Q3UMA3_HGS	-0.865841	3.43451e-06	0.0038229
Q9D6T9_MRPS36	Q3UMA3_HGS	-0.853457	6.68154e-06	0.00516327
P51667_MYL2	Q62087_PON3	-0.886481	9.65677e-07	0.00209168
P04247_MB	Q62087_PON3	-0.833247	1.7562e-05	0.00810038
Q8BK30_NDUFV3	Q62087_PON3	-0.863777	3.85441e-06	0.00403015
P62737_ACTA2	Q9WV92-2_EPB41L3	-0.862158	4.21396e-06	0.00423258
Q8CHP8_PGP	Q9WV92-2_EPB41L3	-0.828689	2.14612e-05	0.00876563
Q8R2G4_ART3	P49182_SERPIND1	-0.839009	1.35127e-05	0.00714022
Q60649_CLPB	P05977_MYL1	-0.847265	9.11495e-06	0.0059435
P38060_HMGCL	P05977_MYL1	-0.855963	5.86885e-06	0.00491708
Q8K2C6_SIRT5	P05977_MYL1	-0.863777	3.85441e-06	0.00403015
Q64727_VCL	Q9EPL9_ACOX3	-0.84667	9.38437e-06	0.00601553
Q9WTX6_CUL1	A0A0A6YVU8_GM9774	-0.83781	1.42822e-05	0.00737789
Q61171_PRDX2	A0A0R4J166_KLHL40	-0.859504	4.86571e-06	0.00447006
Q9JK48_SH3GLB1	O09172_GCLM	-0.876613	1.82143e-06	0.0028702
O70250_PGAM2	Q80UP8_SLC20A2	-0.878225	1.64827e-06	0.00269898
Q9QYJ0_DNAJA2	Q80UP8_SLC20A2	-0.835312	1.60056e-05	0.00778112
Q9WVQ5_APIP	Q80UP8_SLC20A2	-0.880289	1.44734e-06	0.00253459
O70194_EIF3D	Q80UP8_SLC20A2	-0.828689	2.14612e-05	0.00876563
Q8CHP8_PGP	Q80UP8_SLC20A2	-0.822497	2.79262e-05	0.00981518
Q3TIV5_ZC3H15	Q80UP8_SLC20A2	-0.874097	2.12313e-06	0.003049
Q8R3Q6_CCDC58	Q80UP8_SLC20A2	-0.863777	3.85441e-06	0.00403015
Q14BI5_MYOM2	O54734_DDOST	-0.832215	1.83875e-05	0.00819496
Q3UIK0_MYBPC3	O54734_DDOST	-0.836945	1.48599e-05	0.00745234
P38647_HSPA9	O54734_DDOST	-0.862158	4.21396e-06	0.00423258
Q64737_GART	O54734_DDOST	-0.849174	8.29486e-06	0.0057037
Q3TMH2_SCRN3	O54734_DDOST	-0.859649	4.828e-06	0.00445541
P56380_NUDT2	O54734_DDOST	-0.853457	6.68154e-06	0.00516327
E9QM77_ATXN2	Q6PGF7_EXOC8	-0.823348	2.69506e-05	0.00974759
Q9JI75_NQO2	Q6PGF7_EXOC8	-0.83015	2.01385e-05	0.00851357
P97467_PAM	Q9CY16_MRPS28	-0.82602	2.40713e-05	0.00920404
P35505_FAH	Q14CH7_AARS2	-0.848141	8.73047e-06	0.00588562
Q9WUM3_CORO1B	Q8BYL4_YARS2	-0.833506	1.73605e-05	0.00808545
Q9JI91_ACTN2	A0A087WQS2_BZW1	-0.930197	2.27323e-08	0.000297433
Q9JIF9_MYOT	A0A087WQS2_BZW1	-0.825413	2.47006e-05	0.00938355
Q9CZR8_TSFM	A0A087WQS2_BZW1	-0.857438	5.43132e-06	0.00469621
P14152_MDH1	Q9DBH5_LMAN2	-0.860093	4.71408e-06	0.00445278
Q6P3A8_BCKDHB	Q9DBH5_LMAN2	-0.869252	2.82663e-06	0.00347962
O88441_MTX2	Q9DBH5_LMAN2	-0.835744	1.56955e-05	0.00770268
Q3TMH2_SCRN3	Q9DBH5_LMAN2	-0.828689	2.14612e-05	0.00876563
Q9CQ60_PGLS	Q9DBH5_LMAN2	-0.830753	1.96126e-05	0.00842172
P63017_HSPA8	O70622_RTN2	-0.827818	2.22851e-05	0.0089418
Q3UH68_LIMCH1	Q8VCF0_MAVS	-0.822314	2.814e-05	0.00984889
F6RPJ9_IDE	Q8VCF0_MAVS	-0.867321	3.15826e-06	0.0036745
P61202_COPS2	Q8VCF0_MAVS	-0.863777	3.85441e-06	0.00403015
Q8R5H1_USP15	Q8VCF0_MAVS	-0.837377	1.45686e-05	0.00745234
Q4VWZ5_DBI	Q8VCF0_MAVS	-0.826625	2.34566e-05	0.00910461
Q921C5-2_BICD2	Q8VCF0_MAVS	-0.914257	1.11945e-07	0.000727056
Q9DAK9_PHPT1	Q8VCF0_MAVS	-0.82602	2.40713e-05	0.00920404
Q8R1X6_SPART	Q8VCF0_MAVS	-0.907589	1.99451e-07	0.000982055
P62631_EEF1A2	P14142_SLC2A4	-0.907121	2.0737e-07	0.000985784
P61089_UBE2N	P14142_SLC2A4	-0.824561	2.56082e-05	0.0094547
P17665_COX7C	Q91V89_PPP2R5D	-0.830579	1.97638e-05	0.00845208
P48787_TNNI3	Q8K1R7_NEK9	-0.843412	1.09841e-05	0.00652285
P07310_CKM	P27601_GNA13	-0.836777	1.49744e-05	0.00747811
Q62234_MYOM1	P27601_GNA13	-0.874097	2.12313e-06	0.003049
B7ZCI2_NEBL	P27601_GNA13	-0.867905	3.05455e-06	0.00362045
J3QQ13_TNNT2	P27601_GNA13	-0.882353	1.26787e-06	0.00237858
Q9JLV1_BAG3	P27601_GNA13	-0.839009	1.35127e-05	0.00714022
P45376_AKR1B1	P27601_GNA13	-0.911719	1.40209e-07	0.000822643
Q8K0D5_GFM1	P27601_GNA13	-0.855521	6.00563e-06	0.00491959
P70296_PEBP1	P27601_GNA13	-0.831182	1.9246e-05	0.00842172
Q924M7_MPI	P27601_GNA13	-0.832817	1.79019e-05	0.00810038
Q9CQM9_GLRX3	P27601_GNA13	-0.847703	8.92108e-06	0.0059435
Q8BVI4_QDPR	P27601_GNA13	-0.824561	2.56082e-05	0.0094547
Q6P3A8_BCKDHB	P27601_GNA13	-0.87752	1.72215e-06	0.00276196
Q9JK92_HSPB8	P27601_GNA13	-0.8508	7.64686e-06	0.0054956
Q3TMH2_SCRN3	P27601_GNA13	-0.824561	2.56082e-05	0.0094547
A0A1W2P7K6_RAB3IP	P27601_GNA13	-0.853898	6.53199e-06	0.00516327
Q05816_FABP5	Q9QX60_DGUOK	-0.836945	1.48599e-05	0.00745234
P63028_TPT1	Q9QX60_DGUOK	-0.823955	2.62719e-05	0.00956106
Q8VCF0_MAVS	Q9QX60_DGUOK	-0.834881	1.63204e-05	0.00778112
Q9Z1P6_NDUFA7	A0A0R4J079_ACBD3	-0.839876	1.29786e-05	0.00706556
A0A1W2P768_HIST2H3C1	Q60960_KPNA1	-0.830579	1.97634e-05	0.00845208
P27601_GNA13	Q60960_KPNA1	-0.83781	1.42819e-05	0.00737789
P58281-2_OPA1	P39688_FYN	-0.852865	6.88698e-06	0.00522979
Q91VA7_IDH3B	P39688_FYN	-0.826873	2.32086e-05	0.00910461
Q07417_ACADS	P39688_FYN	-0.864223	3.76011e-06	0.00403015
Q9D0F9_PGM1	P39688_FYN	-0.822314	2.81405e-05	0.00984889
P45376_AKR1B1	P39688_FYN	-0.938017	9.00979e-09	0.000172587
Q8K0D5_GFM1	P39688_FYN	-0.852865	6.88698e-06	0.00522979
P16045_LGALS1	P39688_FYN	-0.863191	3.98148e-06	0.00409069
Q3U3J1_BCKDHA	P39688_FYN	-0.836777	1.49747e-05	0.00747811
Q8K1M6-3_DNM1L	P39688_FYN	-0.83626	1.53316e-05	0.00756646
Q9WTP6_AK2	P39688_FYN	-0.833678	1.72274e-05	0.00803092
P32020_SCP2	P39688_FYN	-0.828085	2.20301e-05	0.0088575
Q924M7_MPI	P39688_FYN	-0.876613	1.82143e-06	0.0028702
Q9CQM9_GLRX3	P39688_FYN	-0.89876	4.02197e-07	0.0013816
Q9DCT8_CRIP2	P39688_FYN	-0.83841	1.38926e-05	0.00722125
Q8BVI4_QDPR	P39688_FYN	-0.892101	6.55184e-07	0.00174055
Q6GT24_PRDX6	P39688_FYN	-0.911538	1.42451e-07	0.000822643
Q9CXI0_COQ5	P39688_FYN	-0.845041	1.01572e-05	0.00624874
Q8QZR5_GPT	P39688_FYN	-0.884874	1.07498e-06	0.00222584
Q8C3X4_GUF1	P39688_FYN	-0.829117	2.10662e-05	0.00876563
Q9CQ92_FIS1	P39688_FYN	-0.83428	1.67683e-05	0.00786974
P60670_NPLOC4	P39688_FYN	-0.836441	1.52062e-05	0.00754118
Q91YJ5_MTIF2	P39688_FYN	-0.881198	1.36574e-06	0.00249361
P10518_ALAD	P39688_FYN	-0.879711	1.50135e-06	0.00257952
O88712_CTBP1	Q61781_KRT14	-0.822497	2.79262e-05	0.00981518
P54823_DDX6	Q61781_KRT14	-0.857585	5.38926e-06	0.00468144
Q9CZX8_RPS19	Q61792_LASP1	-0.826625	2.34566e-05	0.00910461
F8VPN4_AGL	Q62523_ZYX	-0.875	2.01027e-06	0.00299705
Q9JK48_SH3GLB1	Q62523_ZYX	-0.845558	9.90641e-06	0.00622501
Q61543_GLG1	Q3UZA1_RCSD1	-0.826625	2.34566e-05	0.00910461
P62737_ACTA2	P63085_MAPK1	-0.863049	4.01265e-06	0.00411348
Q9JI91_ACTN2	P63085_MAPK1	-0.936368	1.10561e-08	0.000199695
Q14BI5_MYOM2	P63085_MAPK1	-0.867184	3.18303e-06	0.00369585
Q3UIK0_MYBPC3	P63085_MAPK1	-0.824381	2.58045e-05	0.00948837
P19123_TNNC1	P63085_MAPK1	-0.835744	1.56955e-05	0.00770268
Q3TMH2_SCRN3	P63085_MAPK1	-0.868802	2.90103e-06	0.00355256
Q9CQ60_PGLS	P63085_MAPK1	-0.841943	1.17785e-05	0.00674833
Q8VCT4_CES1D	Q9D8S4_REXO2	-0.847703	8.92108e-06	0.0059435
O08532_CACNA2D1	Q9D8S4_REXO2	-0.845638	9.86813e-06	0.00621674
Q8K009_ALDH1L2	Q9D8S4_REXO2	-0.828512	2.16264e-05	0.0087973
P0C605_PRKG1	Q9D8S4_REXO2	-0.822922	2.74351e-05	0.00981518
E9PWR4_DIP2C	Q9D8S4_REXO2	-0.835744	1.56958e-05	0.00770268
P48962_SLC25A4	E9QP56_APOC3	-0.843137	1.1129e-05	0.00652285
E9PYH2_ACOT7	E9QP56_APOC3	-0.832817	1.79019e-05	0.00810038
E9QP99_GOLGA3	G3X9E8_PPP2R3A	-0.824806	2.53444e-05	0.0094547
Q05816_FABP5	G3X9E8_PPP2R3A	-0.835312	1.60056e-05	0.00778112
Q60676_PPP5C	G3X9E8_PPP2R3A	-0.84814	8.73067e-06	0.00588562
O35215_DDT	G3X9E8_PPP2R3A	-0.845558	9.90641e-06	0.00622501
Q00897_SERPINA1D	Q8C460_ERI3	-0.846075	9.66078e-06	0.00614926
A0A087WQS2_BZW1	Q91ZE0_TMLHE	-0.860093	4.71408e-06	0.00445278
P63085_MAPK1	Q91ZE0_TMLHE	-0.855372	6.05232e-06	0.00493275
P09542_MYL3	O08583_ALYREF	-0.9121	1.35613e-07	0.000804179
E9Q456_TPM1	O08583_ALYREF	-0.829887	2.03716e-05	0.00859893
Q9D1D4_TMED10	O88545_COPS6	-0.823955	2.62719e-05	0.00956106
P24369_PPIB	P11930_NUDT19	-0.872483	2.33843e-06	0.0032311
O55222_ILK	P11930_NUDT19	-0.83428	1.67683e-05	0.00786974
Q6ZWQ9_MYL12A	P11930_NUDT19	-0.829117	2.10662e-05	0.00876563
P47738_ALDH2	Q9CR42_ANKRD1	-0.835312	1.60056e-05	0.00778112
Q9CQB4_UQCRB	Q9CR42_ANKRD1	-0.82189	2.86419e-05	0.00992501
Q7TMB8_CYFIP1	Q99M07_COA5	-0.832817	1.79019e-05	0.00810038
Q61033_TMPO	Q99M07_COA5	-0.882353	1.26787e-06	0.00237858
A0A1W2P768_HIST2H3C1	Q99M07_COA5	-0.896801	4.65886e-07	0.00148646
Q8CCK0_H2AFY2	Q99M07_COA5	-0.863777	3.85441e-06	0.00403015
O54962_BANF1	Q99M07_COA5	-0.884417	1.10792e-06	0.00223022
A2AS98_NCKAP1	Q99M07_COA5	-0.889004	8.1343e-07	0.00195059
P43406_ITGAV	Q99M07_COA5	-0.831182	1.9246e-05	0.00842172
A0A087WQS2_BZW1	Q99M07_COA5	-0.82602	2.40713e-05	0.00920404
Q9CZR8_TSFM	A0A0A0MQF5_OTUD6B	-0.832215	1.83875e-05	0.00819496
O55028_BCKDK	Q8CBB7_AP1G1	-0.853898	6.53199e-06	0.00516327
P05201_GOT1	Q7TT50_CDC42BPB	-0.846591	9.4208e-06	0.0060349
Q8CGC7_EPRS	Q7TT50_CDC42BPB	-0.835744	1.56958e-05	0.00770268
O08528_HK2	Q7TT50_CDC42BPB	-0.907025	2.09025e-07	0.000986416
Q3U3J1_BCKDHA	Q7TT50_CDC42BPB	-0.902893	2.9206e-07	0.00117415
P53395_DBT	Q7TT50_CDC42BPB	-0.826446	2.36369e-05	0.00913928
Q9CQM9_GLRX3	Q7TT50_CDC42BPB	-0.842975	1.12153e-05	0.00654726
Q8BVI4_QDPR	Q7TT50_CDC42BPB	-0.858028	5.26434e-06	0.00468009
Q811U4_MFN1	Q7TT50_CDC42BPB	-0.830579	1.97638e-05	0.00845208
G5E8J6_HRC	Q7TT50_CDC42BPB	-0.84254	1.14497e-05	0.00660456
Q149B8_PERM1	Q7TT50_CDC42BPB	-0.870418	2.64116e-06	0.00341531
P17183_ENO2	Q7TT50_CDC42BPB	-0.857955	5.28488e-06	0.00468144
P10518_ALAD	Q7TT50_CDC42BPB	-0.877646	1.70878e-06	0.00274659
P07310_CKM	Q80U35_ARHGEF17	-0.886822	9.43767e-07	0.00209168
P14152_MDH1	Q80U35_ARHGEF17	-0.833678	1.72274e-05	0.00803092
P09411_PGK1	Q80U35_ARHGEF17	-0.879587	1.51319e-06	0.00259385
P62631_EEF1A2	P62835_RAP1A	-0.830753	1.96126e-05	0.00842172
Q924M7_MPI	P62835_RAP1A	-0.828689	2.14612e-05	0.00876563
P61089_UBE2N	P62835_RAP1A	-0.874097	2.12313e-06	0.003049
Q8VCF0_MAVS	Q9WTU6-4_MAPK9	-0.824561	2.56082e-05	0.0094547
P07310_CKM	Q9Z0P4_PALM	-0.83781	1.42819e-05	0.00737789
P14152_MDH1	Q9Z0P4_PALM	-0.882809	1.23095e-06	0.00237815
Q9D172_D10JHU81E	Q9Z0P4_PALM	-0.834881	1.63204e-05	0.00778112
Q8R5L1_C1QBP	Q9Z0P4_PALM	-0.824561	2.56082e-05	0.0094547
Q924M7_MPI	Q9Z0P4_PALM	-0.849329	8.23106e-06	0.0056813
Q3URE1_ACSF3	Q9Z0P4_PALM	-0.847265	9.11495e-06	0.0059435
Q6P3A8_BCKDHB	Q9Z0P4_PALM	-0.88889	8.1982e-07	0.00195059
Q3TMH2_SCRN3	Q9Z0P4_PALM	-0.876161	1.87278e-06	0.0028702
Q9CQ60_PGLS	Q9Z0P4_PALM	-0.830753	1.96126e-05	0.00842172
Q60597_OGDH	Q8CJ19_MICAL3	-0.886481	9.65677e-07	0.00209168
Q9D0K2_OXCT1	Q8CJ19_MICAL3	-0.823955	2.62719e-05	0.00956106
P58281-2_OPA1	Q8CJ19_MICAL3	-0.853457	6.68154e-06	0.00516327
Q8CGK3_LONP1	Q8CJ19_MICAL3	-0.824561	2.56082e-05	0.0094547
Q9DBL1_ACADSB	Q8CJ19_MICAL3	-0.827052	2.30314e-05	0.00910461
P53395_DBT	Q8CJ19_MICAL3	-0.906557	2.17265e-07	0.00100697
P55264_ADK	Q8CJ19_MICAL3	-0.826625	2.34566e-05	0.00910461
P85094_ISOC2A	Q8CJ19_MICAL3	-0.826447	2.36365e-05	0.00913928
Q8BVI4_QDPR	Q8CJ19_MICAL3	-0.859649	4.828e-06	0.00445541
A0A0M3HEQ0_TXNRD2	Q8CJ19_MICAL3	-0.83428	1.67683e-05	0.00786974
Q6P3A8_BCKDHB	Q8CJ19_MICAL3	-0.871319	2.50523e-06	0.00329744
O88441_MTX2	Q8CJ19_MICAL3	-0.866736	3.26505e-06	0.00376924
Q99M04_LIAS	Q8CJ19_MICAL3	-0.830405	1.99147e-05	0.00850441
Q9EQP2_EHD4	Q6NSR8_NPEPL1	-0.82189	2.86419e-05	0.00992501
P97467_PAM	Q6NSR8_NPEPL1	-0.829117	2.10662e-05	0.00876563
Q91V41_RAB14	Q9CRA7_ATP5S	-0.861571	4.35134e-06	0.00424481
Q8R5L1_C1QBP	P40936_INMT	-0.826625	2.34566e-05	0.00910461
P49813_TMOD1	P40936_INMT	-0.828689	2.14612e-05	0.00876563
Q6P3A8_BCKDHB	P40936_INMT	-0.884756	1.08341e-06	0.00223022
Q9JK92_HSPB8	P40936_INMT	-0.82189	2.86419e-05	0.00992501
Q00612_G6PDX	Q9DCB8_ISCA2	-0.839876	1.29789e-05	0.00706556
Q9DCV7_KRT7	Q9DCB8_ISCA2	-0.895199	5.24248e-07	0.00159669
P62737_ACTA2	Q61136_PRPF4B	-0.855963	5.86885e-06	0.00491708
Q9JI91_ACTN2	Q61136_PRPF4B	-0.847546	8.99002e-06	0.0059435
O70250_PGAM2	Q61136_PRPF4B	-0.867905	3.05455e-06	0.00362045
Q8R3Q6_CCDC58	Q61136_PRPF4B	-0.822497	2.79262e-05	0.00981518
Q61646_HP	Q8BL97_SRSF7	-0.828085	2.20301e-05	0.0088575
Q9CWJ9_ATIC	Q8BL97_SRSF7	-0.824987	2.51511e-05	0.0094547
A0A0R4J032_C9	Q8BL97_SRSF7	-0.919979	6.56173e-08	0.00054116
Q6ZQ38_CAND1	Q8K268_ABCF3	-0.827907	2.21997e-05	0.00890888
P19001_KRT19	Q8K268_ABCF3	-0.844605	1.03731e-05	0.00631416
Q9DCV7_KRT7	Q8K268_ABCF3	-0.833247	1.7562e-05	0.00810038
Q06185_ATP5I	P63037_DNAJA1	-0.825414	2.47002e-05	0.00938355
Q9JI91_ACTN2	Q6R891_PPP1R9B	-0.842378	1.1538e-05	0.00664468
A6ZI44_ALDOA	Q6R891_PPP1R9B	-0.828689	2.14612e-05	0.00876563
Q6P3A8_BCKDHB	Q6R891_PPP1R9B	-0.846513	9.45686e-06	0.0060498
P28474_ADH5	Q6R891_PPP1R9B	-0.841073	1.22714e-05	0.00682881
G5E814_NDUFA11	Q6R891_PPP1R9B	-0.834881	1.63204e-05	0.00778112
J3QPG5_PSAP	Q6R891_PPP1R9B	-0.861713	4.31768e-06	0.00423258
Q7TNS2_MINOS1	Q6R891_PPP1R9B	-0.909185	1.74407e-07	0.000897378
Q9CXU4_GM10273	Q6R891_PPP1R9B	-0.840475	1.26206e-05	0.00691676
Q91ZE0_TMLHE	Q6R891_PPP1R9B	-0.828689	2.14612e-05	0.00876563
Q99M07_COA5	Q6R891_PPP1R9B	-0.927761	2.96792e-08	0.000340944
Q00623_APOA1	Q8VH51_RBM39	-0.827479	2.26126e-05	0.00903705
A0A0R4J032_C9	Q8VH51_RBM39	-0.864223	3.76011e-06	0.00403015
Q5SS83_FLOT2	Q921I1_TF	-0.834881	1.63204e-05	0.00778112
O08917_FLOT1	Q921I1_TF	-0.82602	2.40713e-05	0.00920404
P17182_ENO1	Q91WC3-2_ACSL6	-0.82189	2.86419e-05	0.00992501
A0A286YCI8_SORBS1	Q91WC3-2_ACSL6	-0.841943	1.17785e-05	0.00674833
P62141_PPP1CB	Q91WC3-2_ACSL6	-0.855963	5.86885e-06	0.00491708
Q921S7_MRPL37	Q91WC3-2_ACSL6	-0.847265	9.11495e-06	0.0059435
G3X8Y1_TRIM55	Q91WC3-2_ACSL6	-0.886939	9.36357e-07	0.00208718
Q8K1J6_TRNT1	Q91WC3-2_ACSL6	-0.831612	1.88847e-05	0.00835923
A0A0N4SUH8_NFU1	Q91WC3-2_ACSL6	-0.824561	2.56082e-05	0.0094547
Q99JB2_STOML2	D3YUP1_CARM1	-0.837209	1.46813e-05	0.00745234
P20065_TMSB4X	D3YUP1_CARM1	-0.844605	1.03731e-05	0.00631416
Q91X72_HPX	A0A0R4J092_MANBA	-0.858916	5.02138e-06	0.00454378
Q9Z2M7_PMM2	A0A0R4J092_MANBA	-0.857882	5.30519e-06	0.00468144
A0A0R4J050_ACY1	Q9Z2V5_HDAC6	-0.892507	6.36593e-07	0.00172234
Q9WTX6_CUL1	Q8K3H0_APPL1	-0.831182	1.9246e-05	0.00842172
A0A0A0MQF5_OTUD6B	Q8K3H0_APPL1	-0.857585	5.38926e-06	0.00468144
O70250_PGAM2	O54901_CD200	-0.869969	2.7113e-06	0.00341531
Q8CHP8_PGP	O54901_CD200	-0.851393	7.42169e-06	0.00542195
Q61425_HADH	P62748_HPCAL1	-0.839443	1.32436e-05	0.00713867
Q9D172_D10JHU81E	P62748_HPCAL1	-0.840475	1.26206e-05	0.00691676
Q3URE1_ACSF3	P62748_HPCAL1	-0.865256	3.5494e-06	0.00387726
Q6P3A8_BCKDHB	P62748_HPCAL1	-0.828335	2.17926e-05	0.00885096
Q8BMS4_COQ3	P62748_HPCAL1	-0.852273	7.09812e-06	0.00535587
Q6P549_INPPL1	P62748_HPCAL1	-0.83428	1.67683e-05	0.00786974
Q99M07_COA5	P62748_HPCAL1	-0.822922	2.74351e-05	0.00981518
Q9JI91_ACTN2	Q5SUR0_PFAS	-0.842378	1.1538e-05	0.00664468
P17182_ENO1	Q5SUR0_PFAS	-0.84254	1.14497e-05	0.00660456
Q99J39_MLYCD	Q5SUR0_PFAS	-0.827303	2.2785e-05	0.00910127
P28474_ADH5	Q5SUR0_PFAS	-0.826625	2.34566e-05	0.00910461
Q9WTX5_SKP1	Q5SUR0_PFAS	-0.882809	1.23095e-06	0.00237815
J3QPG5_PSAP	Q5SUR0_PFAS	-0.869969	2.7113e-06	0.00341531
Q9CZR8_TSFM	Q5SUR0_PFAS	-0.868353	2.977e-06	0.00361447
Q7TNS2_MINOS1	Q5SUR0_PFAS	-0.834881	1.63204e-05	0.00778112
P56380_NUDT2	Q5SUR0_PFAS	-0.832817	1.79019e-05	0.00810038
Q91ZE0_TMLHE	Q5SUR0_PFAS	-0.849329	8.23106e-06	0.0056813
Q99M07_COA5	Q5SUR0_PFAS	-0.836945	1.48599e-05	0.00745234
Q8K1B8_FERMT3	D3YYS6_MGLL	-0.866288	3.34893e-06	0.00381948
Q9JI91_ACTN2	Q9Z247_FKBP9	-0.821706	2.88608e-05	0.00998363
P20108_PRDX3	Q9Z247_FKBP9	-0.841073	1.22714e-05	0.00682881
P70296_PEBP1	Q60823_AKT2	-0.883841	1.15069e-06	0.0022673
P28474_ADH5	Q60823_AKT2	-0.832817	1.79019e-05	0.00810038
Q9JLV5_CUL3	Q60823_AKT2	-0.892101	6.55184e-07	0.00174055
Q9WVQ5_APIP	Q60823_AKT2	-0.853457	6.68154e-06	0.00516327
Q8VC30_TKFC	Q60823_AKT2	-0.898296	4.16551e-07	0.00140667
Q3TIV5_ZC3H15	Q60823_AKT2	-0.836945	1.48599e-05	0.00745234
Q99M07_COA5	Q60823_AKT2	-0.861713	4.31768e-06	0.00423258
Q9WTX6_CUL1	Q91VN4_CHCHD6	-0.822314	2.81405e-05	0.00984889
Q61033_TMPO	Q91VN4_CHCHD6	-0.837377	1.45686e-05	0.00745234
Q60823_AKT2	Q91VN4_CHCHD6	-0.83841	1.38926e-05	0.00722125
Q60936_COQ8A	Q925F2_ESAM	-0.824381	2.58045e-05	0.00948837
Q9DBG5_PLIN3	Q925F2_ESAM	-0.82189	2.86419e-05	0.00992501
P16125_LDHB	Q6Q477_ATP2B4	-0.851393	7.42169e-06	0.00542195
Q9R0Y5-2_AK1	Q6Q477_ATP2B4	-0.825414	2.47002e-05	0.00938355
Q8BFR5_TUFM	Q6Q477_ATP2B4	-0.831612	1.88847e-05	0.00835923
Q9WUR2_ECI2	Q6Q477_ATP2B4	-0.884756	1.08341e-06	0.00223022
A2AKD7_SNTA1	Q6Q477_ATP2B4	-0.824561	2.56082e-05	0.0094547
Q8C0M9_ASRGL1	Q6Q477_ATP2B4	-0.869386	2.80476e-06	0.00346072
Q922U2_KRT5	Q9CWD8_NUBPL	-0.824561	2.56082e-05	0.0094547
P19001_KRT19	Q9CWD8_NUBPL	-0.892673	6.29098e-07	0.00171429
Q9WTX6_CUL1	Q9CWD8_NUBPL	-0.82602	2.40713e-05	0.00920404
Q61033_TMPO	Q9CWD8_NUBPL	-0.867905	3.05455e-06	0.00362045
G5E8R4_PPP6R3	Q9CWD8_NUBPL	-0.826447	2.36365e-05	0.00913928
A0A1W2P768_HIST2H3C1	Q9CWD8_NUBPL	-0.830753	1.96126e-05	0.00842172
Q8CCK0_H2AFY2	Q9CWD8_NUBPL	-0.890609	7.27747e-07	0.00182928
Q60823_AKT2	Q9CWD8_NUBPL	-0.874097	2.12313e-06	0.003049
Q9WTX6_CUL1	Q8VBV7_COPS8	-0.86157	4.35145e-06	0.00424481
P05201_GOT1	G3X956_SUPT16	-0.83781	1.42822e-05	0.00737789
Q3U3J1_BCKDHA	G3X956_SUPT16	-0.826963	2.31199e-05	0.00910461
P53395_DBT	G3X956_SUPT16	-0.844008	1.0675e-05	0.006459
F8WIA1_CLIP1	Q00898_SERPINA1E	-0.859649	4.828e-06	0.00445541
P43883_PLIN2	Q00898_SERPINA1E	-0.911249	1.46078e-07	0.000822643
Q8BVZ1_PLIN5	Q00898_SERPINA1E	-0.83015	2.01385e-05	0.00851357
Q8R3V5_SH3GLB2	Q00898_SERPINA1E	-0.83781	1.42819e-05	0.00737789
A2AN08-5_UBR4	Q99LB6_MAT2B	-0.895607	5.08798e-07	0.00157054
Q9WTX6_CUL1	Q99LB6_MAT2B	-0.849174	8.29505e-06	0.0057037
P53994_RAB2A	Q99LB6_MAT2B	-0.830491	1.98397e-05	0.0084792
E9PWR4_DIP2C	Q99LB6_MAT2B	-0.822314	2.81405e-05	0.00984889
P28658_ATXN10	Q99LB6_MAT2B	-0.868802	2.90111e-06	0.00355256
Q6R891_PPP1R9B	Q99LB6_MAT2B	-0.867321	3.15826e-06	0.0036745
O54901_CD200	Q99LB6_MAT2B	-0.84254	1.14497e-05	0.00660456
Q5SUR0_PFAS	Q99LB6_MAT2B	-0.874548	2.06605e-06	0.00304692
A6ZI44_ALDOA	Q8BXZ1_TMX3	-0.830753	1.96126e-05	0.00842172
Q64737_GART	Q8BXZ1_TMX3	-0.845042	1.01569e-05	0.00624874
P61082_UBE2M	Q8BXZ1_TMX3	-0.83841	1.38926e-05	0.00722125
Q8VDQ1_PTGR2	Q8BXZ1_TMX3	-0.852273	7.09795e-06	0.00535587
Q9CQ60_PGLS	Q8BXZ1_TMX3	-0.874097	2.12313e-06	0.003049
Q91WC3-2_ACSL6	Q7TNC4_LUC7L2	-0.854781	6.24081e-06	0.00501735
Q61739_ITGA6	Q7TNG8_LDHD	-0.828689	2.14612e-05	0.00876563
Q3TLP8_RAC1	Q7TNG8_LDHD	-0.845201	1.0079e-05	0.00622501
A0A140T8J1_FSD2	P62242_RPS8	-0.845201	1.0079e-05	0.00622501
Q9Z2C5_MTM1	P46412_GPX3	-0.845638	9.86813e-06	0.00621674
P01029_C4B	Q921F4_HNRNPLL	-0.845201	1.0079e-05	0.00622501
Q8VE38_OXNAD1	Q921F4_HNRNPLL	-0.824561	2.56082e-05	0.0094547
A0A0R4J032_C9	Q921F4_HNRNPLL	-0.843137	1.1129e-05	0.00652285
P56480_ATP5B	P13597_ICAM1	-0.855888	5.89173e-06	0.00491959
Q9CQ62_DECR1	P13597_ICAM1	-0.873385	2.21591e-06	0.00311635
P42125_ECI1	P13597_ICAM1	-0.849458	8.1785e-06	0.0056813
Q9WUR2_ECI2	P13597_ICAM1	-0.835057	1.61912e-05	0.00778112
Q9JIY5_HTRA2	P13597_ICAM1	-0.85493	6.1928e-06	0.00498677
Q91Z53_GRHPR	A0A0A0MQD5_SHANK3	-0.829974	2.02937e-05	0.00856777
P62737_ACTA2	Q9QXT0_CNPY2	-0.909091	1.75801e-07	0.000900081
Q9JI91_ACTN2	Q9QXT0_CNPY2	-0.898656	4.05384e-07	0.00138891
Q3UIK0_MYBPC3	Q9QXT0_CNPY2	-0.880744	1.40604e-06	0.00253446
P19123_TNNC1	Q9QXT0_CNPY2	-0.862158	4.21396e-06	0.00423258
O70250_PGAM2	Q9QXT0_CNPY2	-0.836345	1.52727e-05	0.00754118
Q9JHW2_NIT2	Q9QXT0_CNPY2	-0.828424	2.17094e-05	0.008826
A2AMM0_CAVIN4	Q9QXT0_CNPY2	-0.850207	7.8782e-06	0.00561721
P47757-4_CAPZB	Q9QXT0_CNPY2	-0.853306	6.73359e-06	0.00518059
Q8BKZ9_PDHX	Q9QXT0_CNPY2	-0.83015	2.01385e-05	0.00851357
P52503_NDUFS6	Q9QXT0_CNPY2	-0.833678	1.72274e-05	0.00803092
P28474_ADH5	Q9QXT0_CNPY2	-0.835312	1.60056e-05	0.00778112
Q9DCM0_ETHE1	Q9QXT0_CNPY2	-0.824987	2.51511e-05	0.0094547
J3QPG5_PSAP	Q9QXT0_CNPY2	-0.82602	2.40713e-05	0.00920404
Q9WV98_TIMM9	Q9QXT0_CNPY2	-0.83023	2.00684e-05	0.00851357
Q9CZR8_TSFM	Q9QXT0_CNPY2	-0.881198	1.36574e-06	0.00249361
Q5DTJ9_MYPN	Q9QXT0_CNPY2	-0.832128	1.84584e-05	0.00822042
Q9CXU4_GM10273	Q9QXT0_CNPY2	-0.834194	1.6833e-05	0.00789558
Q8CHP8_PGP	Q9QXT0_CNPY2	-0.822922	2.74351e-05	0.00981518
Q8R3Q6_CCDC58	Q9QXT0_CNPY2	-0.84254	1.14497e-05	0.00660456
P56380_NUDT2	Q9QXT0_CNPY2	-0.833247	1.7562e-05	0.00810038
Q91ZE0_TMLHE	Q9QXT0_CNPY2	-0.874548	2.06605e-06	0.00304692
Q99M07_COA5	Q9QXT0_CNPY2	-0.832215	1.83875e-05	0.00819496
Q9CWD8_NUBPL	Q9QXT0_CNPY2	-0.822922	2.74351e-05	0.00981518
Q99LB6_MAT2B	Q9QXT0_CNPY2	-0.877066	1.77128e-06	0.00282661
Q9JI91_ACTN2	F7DCH5_CLASP2	-0.901758	3.19313e-07	0.00125011
Q9DAK9_PHPT1	Q71FD7_FBLIM1	-0.877003	1.77823e-06	0.00283654
P51855_GSS	Q71FD7_FBLIM1	-0.84687	9.29304e-06	0.00601553
P62737_ACTA2	Q8C052_MAP1S	-0.864153	3.77483e-06	0.00403015
P19123_TNNC1	Q8C052_MAP1S	-0.848735	8.47753e-06	0.00575689
Q9WTX6_CUL1	Q9CPZ8_CMC1	-0.855963	5.86885e-06	0.00491708
G5E8R4_PPP6R3	Q9CPZ8_CMC1	-0.825414	2.47002e-05	0.00938355
G5E829_ATP2B1	Q9CPZ8_CMC1	-0.876161	1.87278e-06	0.0028702
A2AS98_NCKAP1	Q9CPZ8_CMC1	-0.82189	2.86419e-05	0.00992501
P62748_HPCAL1	Q9CPZ8_CMC1	-0.84667	9.38437e-06	0.00601553
P21614_GC	Q920A7_AFG3L1	-0.85493	6.1928e-06	0.00498677
B8JJN0_GM20547	Q920A7_AFG3L1	-0.859061	4.98269e-06	0.00451538
P19221_F2	Q920A7_AFG3L1	-0.867321	3.15826e-06	0.0036745
Q03734_SERPINA3M	Q920A7_AFG3L1	-0.828689	2.14612e-05	0.00876563
P62737_ACTA2	E9Q8I9-2_FRY	-0.897264	4.50098e-07	0.0014864
Q9JI91_ACTN2	E9Q8I9-2_FRY	-0.911629	1.41319e-07	0.000822643
P07310_CKM	E9Q8I9-2_FRY	-0.832645	1.80396e-05	0.00812975
Q62234_MYOM1	E9Q8I9-2_FRY	-0.847265	9.11495e-06	0.0059435
O70250_PGAM2	E9Q8I9-2_FRY	-0.884417	1.10792e-06	0.00223022
Q9JHW2_NIT2	E9Q8I9-2_FRY	-0.832645	1.80396e-05	0.00812975
P47757-4_CAPZB	E9Q8I9-2_FRY	-0.837377	1.45686e-05	0.00745234
P35385_HSPB7	E9Q8I9-2_FRY	-0.865841	3.43451e-06	0.0038229
P28474_ADH5	E9Q8I9-2_FRY	-0.880289	1.44734e-06	0.00253459
A0A0R4J093_CMPK1	E9Q8I9-2_FRY	-0.929272	2.51816e-08	0.000308168
Q9CXT8_PMPCB	E9Q8I9-2_FRY	-0.849768	8.05302e-06	0.0056813
Q9DCM0_ETHE1	E9Q8I9-2_FRY	-0.849329	8.23106e-06	0.0056813
P61082_UBE2M	E9Q8I9-2_FRY	-0.823955	2.62719e-05	0.00956106
Q9WVQ5_APIP	E9Q8I9-2_FRY	-0.865841	3.43451e-06	0.0038229
Q3TMH2_SCRN3	E9Q8I9-2_FRY	-0.855521	6.00563e-06	0.00491959
Q3TIV5_ZC3H15	E9Q8I9-2_FRY	-0.839009	1.35127e-05	0.00714022
Q8R3Q6_CCDC58	E9Q8I9-2_FRY	-0.822497	2.79262e-05	0.00981518
Q8JZU0_NUDT13	P59999_ARPC4	-0.843137	1.1129e-05	0.00652285
P04247_MB	O70423_AOC3	-0.833247	1.7562e-05	0.00810038
Q921G7_ETFDH	O70423_AOC3	-0.835744	1.56955e-05	0.00770268
P16125_LDHB	O70423_AOC3	-0.830753	1.96126e-05	0.00842172
Q9CQA3_SDHB	O70423_AOC3	-0.834881	1.63204e-05	0.00778112
Q8BFR5_TUFM	O70423_AOC3	-0.850207	7.87802e-06	0.00561721
Q9D2G2_DLST	O70423_AOC3	-0.829117	2.10662e-05	0.00876563
P99029_PRDX5	O70423_AOC3	-0.839009	1.35127e-05	0.00714022
Q8K2C6_SIRT5	O70423_AOC3	-0.900929	3.40618e-07	0.00127082
J3QQ13_TNNT2	Q8VDP4_CCAR2	-0.83841	1.38926e-05	0.00722125
Q91X72_HPX	Q8VDP4_CCAR2	-0.8508	7.64686e-06	0.0054956
P06684_C5	Q8VDP4_CCAR2	-0.823955	2.62719e-05	0.00956106
P01029_C4B	Q8VDP4_CCAR2	-0.84667	9.38437e-06	0.00601553
Q61646_HP	Q8VDP4_CCAR2	-0.915849	9.68482e-08	0.000673402
Q5EBG6_HSPB6	Q8VDP4_CCAR2	-0.875581	1.94043e-06	0.00291782
E9PVD2_ITIH4	Q8VDP4_CCAR2	-0.853898	6.53199e-06	0.00516327
Q9JK92_HSPB8	Q8VDP4_CCAR2	-0.825413	2.47006e-05	0.00938355
A0A0R4J032_C9	Q8VDP4_CCAR2	-0.864223	3.76011e-06	0.00403015
Q06890_CLU	Q9CPR5_MRPL15	-0.828424	2.17094e-05	0.008826
P51881_SLC25A5	O55234_PSMB5	-0.822314	2.814e-05	0.00984889
Q8R2G4_ART3	O55234_PSMB5	-0.877067	1.77123e-06	0.00282661
P39054_DNM2	Q9D7P6_ISCU	-0.827052	2.30314e-05	0.00910461
Q9CW03_SMC3	Q9D7P6_ISCU	-0.849096	8.32721e-06	0.00572252
Q9CU62_SMC1A	Q9D7P6_ISCU	-0.840475	1.26206e-05	0.00691676
Q61187_TSG101	Q9D7P6_ISCU	-0.856405	5.73468e-06	0.00485964
P18654_RPS6KA3	Q9D7P6_ISCU	-0.82189	2.86419e-05	0.00992501
E9PWR4_DIP2C	Q9D7P6_ISCU	-0.87655	1.82861e-06	0.0028702
Q9CWZ7_NAPG	Q9D7P6_ISCU	-0.82602	2.40713e-05	0.00920404
P28658_ATXN10	Q9D7P6_ISCU	-0.889463	7.88079e-07	0.00191711
Q9WV92-2_EPB41L3	Q9D7P6_ISCU	-0.884874	1.07498e-06	0.00222584
P63085_MAPK1	Q9D7P6_ISCU	-0.834109	1.68978e-05	0.00791595
Q61136_PRPF4B	Q9D7P6_ISCU	-0.869386	2.80476e-06	0.00346072
Q6R891_PPP1R9B	Q9D7P6_ISCU	-0.855963	5.86885e-06	0.00491708
Q9QXT0_CNPY2	Q9D7P6_ISCU	-0.909607	1.68247e-07	0.000897378
Q8C052_MAP1S	Q9D7P6_ISCU	-0.872934	2.27651e-06	0.00318144
O70250_PGAM2	Q9JK81_MYG1	-0.827052	2.30314e-05	0.00910461
Q91ZJ5_UGP2	Q9JK81_MYG1	-0.82189	2.86419e-05	0.00992501
Q61646_HP	Q9JK81_MYG1	-0.882809	1.23095e-06	0.00237815
Q8CHP8_PGP	Q9JK81_MYG1	-0.885906	1.00361e-06	0.00212762
Q60597_OGDH	Q99KF1_TMED9	-0.831612	1.88847e-05	0.00835923
P53395_DBT	Q99KF1_TMED9	-0.858398	5.16186e-06	0.00464098
Q8BVI4_QDPR	Q99KF1_TMED9	-0.854339	6.38508e-06	0.00510551
A2AKD7_SNTA1	Q99KF1_TMED9	-0.855372	6.05232e-06	0.00493275
Q6P3A8_BCKDHB	Q99KF1_TMED9	-0.862908	4.0441e-06	0.00414353
O88441_MTX2	Q99KF1_TMED9	-0.859359	4.90376e-06	0.00449917
Q8C0M9_ASRGL1	Q99KF1_TMED9	-0.856848	5.60294e-06	0.00477637
Q8CC88_VWA8	Q9D3L3_SNAP23	-0.865841	3.43451e-06	0.0038229
Q07417_ACADS	Q9D3L3_SNAP23	-0.826625	2.34566e-05	0.00910461
A2AUC9_KLHL41	Q9D3L3_SNAP23	-0.834711	1.6446e-05	0.00781365
Q924M7_MPI	Q9D3L3_SNAP23	-0.882353	1.26787e-06	0.00237858
Q3URE1_ACSF3	Q9D3L3_SNAP23	-0.828689	2.14612e-05	0.00876563
Q6P549_INPPL1	Q9D3L3_SNAP23	-0.845201	1.0079e-05	0.00622501
A0A0R4J137_PHYHD1	Q9D3L3_SNAP23	-0.841508	1.2023e-05	0.00682881
F8WI22_BCLAF1	Q8BTY1_KYAT1	-0.834116	1.68919e-05	0.00791595
Q99M87_DNAJA3	P70699_GAA	-0.84667	9.38437e-06	0.00601553
P28474_ADH5	P70699_GAA	-0.829117	2.10662e-05	0.00876563
P47809_MAP2K4	P70699_GAA	-0.840909	1.23664e-05	0.00685276
Q8R1G2_CMBL	P70699_GAA	-0.856995	5.55954e-06	0.00474786
G5E8R4_PPP6R3	Q9QZ06_TOLLIP	-0.87332	2.22463e-06	0.00312748
Q99JX4_EIF3M	Q9QZ06_TOLLIP	-0.824381	2.58045e-05	0.00948837
O70250_PGAM2	Q5XJY4_PARL	-0.830753	1.96126e-05	0.00842172
Q3TIV5_ZC3H15	Q5XJY4_PARL	-0.822497	2.79262e-05	0.00981518
Q8R3Q6_CCDC58	Q5XJY4_PARL	-0.822497	2.79262e-05	0.00981518
Q9WTX6_CUL1	P34884_MIF	-0.824987	2.51511e-05	0.0094547
A0A0A0MQF5_OTUD6B	P34884_MIF	-0.849329	8.23106e-06	0.0056813
J3QPG5_PSAP	Q9D8L3_SSR4	-0.82602	2.40713e-05	0.00920404
Q62165_DAG1	Q07456_AMBP	-0.848141	8.73047e-06	0.00588562
O89079_COPE	Q07456_AMBP	-0.828085	2.20301e-05	0.0088575
P56959_FUS	Q07456_AMBP	-0.882353	1.26787e-06	0.00237858
Q9WV02_RBMX	Q07456_AMBP	-0.822497	2.79262e-05	0.00981518
Q9ESZ8_GTF2I	Q07456_AMBP	-0.851393	7.42169e-06	0.00542195
P97822_ANP32E	Q07456_AMBP	-0.900929	3.40618e-07	0.00127082
P30681_HMGB2	Q07456_AMBP	-0.892673	6.29098e-07	0.00171429
Q8VDP4_CCAR2	Q07456_AMBP	-0.875581	1.94043e-06	0.00291782
Q9JK81_MYG1	Q07456_AMBP	-0.847703	8.92108e-06	0.0059435
Q91ZJ5_UGP2	P09925_SURF1	-0.822497	2.79262e-05	0.00981518
P21981_TGM2	P09925_SURF1	-0.882353	1.26787e-06	0.00237858
G3X8Q5_CP	P09925_SURF1	-0.826625	2.34566e-05	0.00910461
Q60864_STIP1	P09925_SURF1	-0.842976	1.1215e-05	0.00654726
P48722_HSPA4L	P09925_SURF1	-0.839277	1.33455e-05	0.00714022
Q9CWJ9_ATIC	P09925_SURF1	-0.826625	2.34566e-05	0.00910461
Q9D1P4_CHORDC1	P09925_SURF1	-0.954592	7.87842e-10	3.9593e-05
P70670_NACA	Q9DAW9_CNN3	-0.849329	8.23106e-06	0.0056813
Q9Z2Z6_SLC25A20	Q9DAW9_CNN3	-0.823955	2.62719e-05	0.00956106
A0A0G2JFH2_MAP4	Q9DAW9_CNN3	-0.843137	1.1129e-05	0.00652285
Q9DCM2_GSTK1	Q9DAW9_CNN3	-0.865256	3.5494e-06	0.00387726
O35855_BCAT2	Q9DAW9_CNN3	-0.843137	1.1129e-05	0.00652285
A0A0R4J0S3_RTN4IP1	Q9DAW9_CNN3	-0.853457	6.68154e-06	0.00516327
Q78IK4_APOOL	Q9DAW9_CNN3	-0.841073	1.22714e-05	0.00682881
A0A0R4J0P1_ACAD8	Q9DAW9_CNN3	-0.840475	1.26206e-05	0.00691676
Q149B8_PERM1	Q9DAW9_CNN3	-0.882353	1.26787e-06	0.00237858
Q3UHB1_NT5DC3	Q9DAW9_CNN3	-0.834881	1.63204e-05	0.00778112
A0A0R4J137_PHYHD1	Q9DAW9_CNN3	-0.829117	2.10662e-05	0.00876563
A0A075B5P6_IGHM	Q8CC21_TTC19	-0.830579	1.97638e-05	0.00845208
Q9CQA3_SDHB	Q9ET01_PYGL	-0.830753	1.96126e-05	0.00842172
Q9D2G2_DLST	Q9ET01_PYGL	-0.858028	5.26434e-06	0.00468009
Q9Z2Z6_SLC25A20	Q9ET01_PYGL	-0.827052	2.30314e-05	0.00910461
O35855_BCAT2	Q9ET01_PYGL	-0.851393	7.42169e-06	0.00542195
P40630_TFAM	Q9ET01_PYGL	-0.880289	1.44734e-06	0.00253459
Q6P3A8_BCKDHB	Q9ET01_PYGL	-0.842378	1.1538e-05	0.00664468
P56382_ATP5E	Q9ET01_PYGL	-0.839009	1.35127e-05	0.00714022
Q8K2C6_SIRT5	Q9ET01_PYGL	-0.851393	7.42169e-06	0.00542195
P57780_ACTN4	Q499X9_MARS2	-0.827052	2.30314e-05	0.00910461
P24369_PPIB	Q499X9_MARS2	-0.822497	2.79262e-05	0.00981518
Q62165_DAG1	O88958_GNPDA1	-0.822556	2.78583e-05	0.00981518
Q8BTS0_DDX5	O88958_GNPDA1	-0.828853	2.13098e-05	0.00876563
Q569Z6_THRAP3	O88958_GNPDA1	-0.887281	9.14953e-07	0.0020611
P97822_ANP32E	O88958_GNPDA1	-0.836177	1.53901e-05	0.00758767
Q9CWJ9_ATIC	Q3UJB0_SF3B2	-0.82602	2.40713e-05	0.00920404
Q9JI75_NQO2	Q3UJB0_SF3B2	-0.871901	2.42063e-06	0.00324104
P07310_CKM	O54865_GUCY1B3	-0.841779	1.18701e-05	0.00679666
Q6P3A8_BCKDHB	O54865_GUCY1B3	-0.833937	1.70285e-05	0.00797186
A6H644_PPP1R12B	Q6PAR5-4_GAPVD1	-0.847107	9.18574e-06	0.00595993
Q9DC61_PMPCA	Q6PAR5-4_GAPVD1	-0.866288	3.34893e-06	0.00381948
A0A0A6YVU8_GM9774	Q6PAR5-4_GAPVD1	-0.872934	2.27651e-06	0.00318144
Q8VBV7_COPS8	Q6PAR5-4_GAPVD1	-0.835744	1.56958e-05	0.00770268
E9Q6D8_C6	Q8N7N5_DCAF8	-0.823593	2.66744e-05	0.00968606
P29788_VTN	Q8N7N5_DCAF8	-0.850934	7.59578e-06	0.0054956
P21981_TGM2	Q9D8X1_CUTC	-0.848141	8.73047e-06	0.00588562
Q9D1P4_CHORDC1	Q9D8X1_CUTC	-0.872934	2.27644e-06	0.00318144
P14152_MDH1	O35682_MYADM	-0.903926	2.69009e-07	0.00113919
Q61425_HADH	O35682_MYADM	-0.829117	2.10662e-05	0.00876563
Q9D172_D10JHU81E	O35682_MYADM	-0.82602	2.40713e-05	0.00920404
A0A140LIU4_COX7A1	O35682_MYADM	-0.833247	1.7562e-05	0.00810038
Q3TMH2_SCRN3	O35682_MYADM	-0.829117	2.10662e-05	0.00876563
O88545_COPS6	Q5I043_USP28	-0.82438	2.5805e-05	0.00948837
Q07456_AMBP	P25976_UBTF	-0.822922	2.74351e-05	0.00981518
P63168_DYNLL1	P25976_UBTF	-0.839876	1.29789e-05	0.00706556
Q8BH64_EHD2	F8WIK0_CIAPIN1	-0.834881	1.63204e-05	0.00778112
O08917_FLOT1	F8WIK0_CIAPIN1	-0.880744	1.40604e-06	0.00253446
E9Q3Y4_LRBA	F8WIK0_CIAPIN1	-0.82602	2.40713e-05	0.00920404
P27601_GNA13	F8WIK0_CIAPIN1	-0.857585	5.38926e-06	0.00468144
Q9Z2V5_HDAC6	F8WIK0_CIAPIN1	-0.826447	2.36365e-05	0.00913928
Q8VDP4_CCAR2	F8WIK0_CIAPIN1	-0.83841	1.38926e-05	0.00722125
D3YYS6_MGLL	O89053_CORO1A	-0.832817	1.79019e-05	0.00810038
Q9WTI7_MYO1C	A2AAJ9_OBSCN	-0.859949	4.7507e-06	0.00445541
Q61739_ITGA6	A2AAJ9_OBSCN	-0.872033	2.40176e-06	0.00323667
Q3TLP8_RAC1	A2AAJ9_OBSCN	-0.857585	5.38926e-06	0.00468144
P20065_TMSB4X	A2AAJ9_OBSCN	-0.843137	1.1129e-05	0.00652285
P21107-2_TPM3	A2AAJ9_OBSCN	-0.823955	2.62719e-05	0.00956106
Q9QUI0_RHOA	A2AAJ9_OBSCN	-0.828689	2.14612e-05	0.00876563
Q99JI6_RAP1B	A2AAJ9_OBSCN	-0.824561	2.56082e-05	0.0094547
Q3UMA3_HGS	A2AAJ9_OBSCN	-0.832817	1.79019e-05	0.00810038
P39688_FYN	A2AAJ9_OBSCN	-0.852865	6.88698e-06	0.00522979
B1AR13_CISD3	Q4VA93_PRKCA	-0.833678	1.72274e-05	0.00803092
Q9JLV5_CUL3	P23591_TSTA3	-0.827052	2.30314e-05	0.00910461
A8Y5T6_PARS2	P23591_TSTA3	-0.861126	4.458e-06	0.00429063
Q99M07_COA5	P23591_TSTA3	-0.841073	1.22714e-05	0.00682881
Q9CWD8_NUBPL	P23591_TSTA3	-0.878225	1.64827e-06	0.00269898
Q7TMB8_CYFIP1	Q9D7N3_MRPS9	-0.829117	2.10662e-05	0.00876563
P84078_ARF1	Q9D7N3_MRPS9	-0.837377	1.45686e-05	0.00745234
A0A1W2P768_HIST2H3C1	Q9D7N3_MRPS9	-0.864223	3.76011e-06	0.00403015
E9PVN6_GM20498	Q9D7N3_MRPS9	-0.853898	6.53199e-06	0.00516327
A2AS98_NCKAP1	Q9D7N3_MRPS9	-0.862603	4.11232e-06	0.00419437
Q9R1C7_PRPF40A	Q9D7N3_MRPS9	-0.827907	2.21997e-05	0.00890888
P62748_HPCAL1	Q9D7N3_MRPS9	-0.827996	2.21148e-05	0.0088849
P19001_KRT19	Q9ERP3_TRIM54	-0.83428	1.67683e-05	0.00786974
O35350_CAPN1	O88531_PPT1	-0.833161	1.76297e-05	0.00810038
Q99JB2_STOML2	Q6PAM0_PRKAB2	-0.826447	2.36365e-05	0.00913928
Q8R2G4_ART3	Q6PAM0_PRKAB2	-0.845201	1.0079e-05	0.00622501
Q99M01_FARS2	B2RQC6_CAD	-0.835312	1.60056e-05	0.00778112
P62737_ACTA2	Q64471_GSTT1	-0.886939	9.36357e-07	0.00208718
P19123_TNNC1	Q64471_GSTT1	-0.892673	6.29098e-07	0.00171429
Q9D7P6_ISCU	Q64471_GSTT1	-0.856995	5.55954e-06	0.00474786
Q91ZJ5_UGP2	E9QN44_D2HGDH	-0.851393	7.42169e-06	0.00542195
P21981_TGM2	E9QN44_D2HGDH	-0.832817	1.79019e-05	0.00810038
P29699_AHSG	E9QN44_D2HGDH	-0.828085	2.20301e-05	0.0088575
O70548_TCAP	E9QN44_D2HGDH	-0.859649	4.828e-06	0.00445541
P17427_AP2A2	Q9ERV1_MKRN2	-0.929753	2.38822e-08	0.000298626
Q61646_HP	Q9Z1M8_IK	-0.837377	1.45686e-05	0.00745234
F8WIE5_HECTD1	A2AL78_ASPH	-0.85101	7.56663e-06	0.00549506
Q9DCV7_KRT7	Q8VE95_	-0.834881	1.63204e-05	0.00778112
Q9JK48_SH3GLB1	Q60770_STXBP3	-0.841508	1.2023e-05	0.00682881
P63017_HSPA8	Q8R0Y8_SLC25A42	-0.826357	2.37276e-05	0.00917069
P45376_AKR1B1	Q6PAV2_HERC4	-0.859061	4.98269e-06	0.00451538
Q8K0D5_GFM1	Q6PAV2_HERC4	-0.861713	4.31768e-06	0.00423258
P32020_SCP2	Q6PAV2_HERC4	-0.841073	1.22714e-05	0.00682881
Q5SSW2_PSME4	Q6PAV2_HERC4	-0.832215	1.83875e-05	0.00819496
G5E8J6_HRC	Q6PAV2_HERC4	-0.855521	6.00563e-06	0.00491959
Q91YJ5_MTIF2	Q6PAV2_HERC4	-0.848735	8.47753e-06	0.00575689
Q05816_FABP5	Q8BP40_ACP6	-0.845638	9.86813e-06	0.00621674
P63028_TPT1	Q8BP40_ACP6	-0.825413	2.47006e-05	0.00938355
Q8BRK8_PRKAA2	Q62433_NDRG1	-0.823955	2.62719e-05	0.00956106
Q8CHP8_PGP	Q9Z1T1_AP3B1	-0.828689	2.14612e-05	0.00876563
P14152_MDH1	P61750_ARF4	-0.905524	2.36439e-07	0.0010747
Q61425_HADH	P61750_ARF4	-0.834881	1.63204e-05	0.00778112
Q9D172_D10JHU81E	P61750_ARF4	-0.853457	6.68154e-06	0.00516327
Q65CL1_CTNNA3	B2RXC1_TRAPPC11	-0.844883	1.02352e-05	0.00628758
Q8BMS1_HADHA	Q6PGC1_DHX29	-0.834194	1.6833e-05	0.00789558
Q9CR68_UQCRFS1	Q6PGC1_DHX29	-0.86312	3.99706e-06	0.00410236
Q8K411_PITRM1	Q6PGC1_DHX29	-0.825413	2.47006e-05	0.00938355
Q7TSQ8_PDPR	Q6PGC1_DHX29	-0.84667	9.38437e-06	0.00601553
Q8R164_BPHL	Q6PGC1_DHX29	-0.84667	9.38437e-06	0.00601553
Q60649_CLPB	Q6PGC1_DHX29	-0.855963	5.86885e-06	0.00491708
Q8VDC0_LARS2	Q6PGC1_DHX29	-0.823682	2.6575e-05	0.00965348
A0A0R4J081_NDUFAF1	Q6PGC1_DHX29	-0.844445	1.04536e-05	0.00635074
F7A8H6_GPX4	Q6PGC1_DHX29	-0.834109	1.68978e-05	0.00791595
E9Q3H6_COQ10A	Q6PGC1_DHX29	-0.836345	1.52727e-05	0.00754118
Q8R3F5_MCAT	Q6PGC1_DHX29	-0.847029	9.22132e-06	0.00597927
Q9EP89_LACTB	Q6PGC1_DHX29	-0.846074	9.66099e-06	0.00614926
Q91WM2_HDHD5	Q6PGC1_DHX29	-0.919979	6.56173e-08	0.00054116
Q60823_AKT2	Q8VEA4_CHCHD4	-0.828689	2.14612e-05	0.00876563
G3X9M0_DAP3	P29268_CTGF	-0.824561	2.56082e-05	0.0094547
Q8K009_ALDH1L2	Q8K182_C8A	-0.828085	2.20301e-05	0.0088575
Q544X6_FECH	Q8K182_C8A	-0.835312	1.60056e-05	0.00778112
P43883_PLIN2	Q8K182_C8A	-0.886481	9.65677e-07	0.00209168
Q61033_TMPO	G5E8T9_HAGH	-0.855521	6.00563e-06	0.00491959
Q8CCK0_H2AFY2	G5E8T9_HAGH	-0.843137	1.1129e-05	0.00652285
Q8BYA0_TBCD	G5E8T9_HAGH	-0.836345	1.52727e-05	0.00754118
P62737_ACTA2	Q7TT37_ELP1	-0.898296	4.16551e-07	0.00140667
Q3UIK0_MYBPC3	Q7TT37_ELP1	-0.894737	5.42211e-07	0.0015988
P17182_ENO1	Q7TT37_ELP1	-0.856995	5.55954e-06	0.00474786
P19123_TNNC1	Q7TT37_ELP1	-0.915377	1.01133e-07	0.000676287
P09411_PGK1	Q7TT37_ELP1	-0.847108	9.18554e-06	0.00595993
Q9JHW2_NIT2	Q7TT37_ELP1	-0.858472	5.14172e-06	0.00462779
A2AMM0_CAVIN4	Q7TT37_ELP1	-0.83015	2.01385e-05	0.00851357
P47757-4_CAPZB	Q7TT37_ELP1	-0.876613	1.82143e-06	0.0028702
P47754_CAPZA2	Q7TT37_ELP1	-0.853457	6.68154e-06	0.00516327
A2ABY3_PCYT2	Q7TT37_ELP1	-0.832817	1.79019e-05	0.00810038
Q5DTJ9_MYPN	Q7TT37_ELP1	-0.844605	1.03731e-05	0.00631416
Q91ZE0_TMLHE	Q7TT37_ELP1	-0.830753	1.96126e-05	0.00842172
O70571_PDK4	Q9CPS6_HINT3	-0.847265	9.11495e-06	0.0059435
Q99JB8_PACSIN3	Q9CPS6_HINT3	-0.845201	1.0079e-05	0.00622501
P60824_CIRBP	Q9CPS6_HINT3	-0.843137	1.1129e-05	0.00652285
Q9CR62_SLC25A11	P97290_SERPING1	-0.862016	4.24693e-06	0.00423258
O35350_CAPN1	Q99JR5_TINAGL1	-0.83841	1.38926e-05	0.00722125
Q91WC3-2_ACSL6	Q99JR5_TINAGL1	-0.863777	3.85441e-06	0.00403015
G5E814_NDUFA11	Q9ERE7_MESD	-0.827052	2.30314e-05	0.00910461
Q9JLV5_CUL3	Q9ERE7_MESD	-0.868802	2.90111e-06	0.00355256
P11930_NUDT19	Q9ERE7_MESD	-0.840909	1.23664e-05	0.00685276
Q61543_GLG1	Q91YN9_BAG2	-0.849329	8.23106e-06	0.0056813
Q61646_HP	Q9D8S5_SRSF5	-0.826625	2.34566e-05	0.00910461
Q99JB2_STOML2	Q9EPL4_METTL9	-0.825414	2.47002e-05	0.00938355
Q6PFA2_CLTA	Q9EPL4_METTL9	-0.82189	2.86419e-05	0.00992501
E9Q8I0_CFH	P56384_ATP5G3	-0.828689	2.14612e-05	0.00876563
Q9CQQ7_ATP5F1	Q01279_EGFR	-0.82602	2.40713e-05	0.00920404
Q99NB1_ACSS1	Q01279_EGFR	-0.83428	1.67683e-05	0.00786974
P47934_CRAT	Q01279_EGFR	-0.827052	2.30314e-05	0.00910461
P47738_ALDH2	Q01279_EGFR	-0.837377	1.45686e-05	0.00745234
E9QQ25_SPEG	Q01279_EGFR	-0.867905	3.05455e-06	0.00362045
O08532_CACNA2D1	Q01279_EGFR	-0.824561	2.56082e-05	0.0094547
Q8K009_ALDH1L2	Q01279_EGFR	-0.894166	5.65121e-07	0.00162628
G5E895_AKR1B10	Q01279_EGFR	-0.841073	1.22714e-05	0.00682881
P56375_ACYP2	Q01279_EGFR	-0.83841	1.38926e-05	0.00722125
Q544X6_FECH	Q01279_EGFR	-0.886939	9.36357e-07	0.00208718
P97478_COQ7	Q01279_EGFR	-0.907121	2.0737e-07	0.000985784
Q8BGC4_ZADH2	Q01279_EGFR	-0.911249	1.46078e-07	0.000822643
O55028_BCKDK	Q01279_EGFR	-0.847265	9.11495e-06	0.0059435
Q9QX60_DGUOK	Q01279_EGFR	-0.865841	3.43451e-06	0.0038229
P62737_ACTA2	Q8BUR4_DOCK1	-0.827052	2.30314e-05	0.00910461
Q9JI91_ACTN2	Q8BUR4_DOCK1	-0.832042	1.85287e-05	0.00824401
Q3UIK0_MYBPC3	Q8BUR4_DOCK1	-0.839009	1.35127e-05	0.00714022
Q62234_MYOM1	Q8BUR4_DOCK1	-0.872033	2.40176e-06	0.00323667
P17182_ENO1	Q8BUR4_DOCK1	-0.829117	2.10662e-05	0.00876563
A6ZI44_ALDOA	Q8BUR4_DOCK1	-0.841073	1.22714e-05	0.00682881
Q8BFR5_TUFM	Q8BUR4_DOCK1	-0.848141	8.73047e-06	0.00588562
Q8QZS1_HIBCH	Q8BUR4_DOCK1	-0.884417	1.10792e-06	0.00223022
Q9D172_D10JHU81E	Q8BUR4_DOCK1	-0.857585	5.38926e-06	0.00468144
Q9CPY7_LAP3	Q8BUR4_DOCK1	-0.842378	1.1538e-05	0.00664468
A2AMM0_CAVIN4	Q8BUR4_DOCK1	-0.85493	6.1928e-06	0.00498677
P70296_PEBP1	Q8BUR4_DOCK1	-0.887971	8.73029e-07	0.00198238
P85094_ISOC2A	Q8BUR4_DOCK1	-0.835744	1.56955e-05	0.00770268
Q9DCL9_PAICS	Q8BUR4_DOCK1	-0.865703	3.46133e-06	0.00383583
O09131_GSTO1	Q8BUR4_DOCK1	-0.867321	3.15826e-06	0.0036745
Q6P3A8_BCKDHB	Q8BUR4_DOCK1	-0.864084	3.78937e-06	0.00403015
P62073_TIMM10	Q8BUR4_DOCK1	-0.874097	2.12313e-06	0.003049
P28474_ADH5	Q8BUR4_DOCK1	-0.927761	2.96792e-08	0.000340944
Q9CXT8_PMPCB	Q8BUR4_DOCK1	-0.85493	6.1928e-06	0.00498677
O88441_MTX2	Q8BUR4_DOCK1	-0.825414	2.47002e-05	0.00938355
Q9CZN8_QRSL1	Q8BUR4_DOCK1	-0.822497	2.79262e-05	0.00981518
P61082_UBE2M	Q8BUR4_DOCK1	-0.880744	1.40604e-06	0.00253446
Q3TMH2_SCRN3	Q8BUR4_DOCK1	-0.884417	1.10792e-06	0.00223022
Q9CR98_FAM136A	Q8BUR4_DOCK1	-0.879465	1.52487e-06	0.00261159
A0A1W2P7K6_RAB3IP	Q8BUR4_DOCK1	-0.851833	7.2584e-06	0.00541924
Q9CXU4_GM10273	Q8BUR4_DOCK1	-0.910687	1.53365e-07	0.000840848
Q8BHG2-3_	Q8BUR4_DOCK1	-0.83428	1.67683e-05	0.00786974
Q8R3Q6_CCDC58	Q8BUR4_DOCK1	-0.857585	5.38926e-06	0.00468144
P56380_NUDT2	Q8BUR4_DOCK1	-0.880289	1.44734e-06	0.00253459
A0A0A6YVU8_GM9774	Q8BUR4_DOCK1	-0.880744	1.40604e-06	0.00253446
Q91ZE0_TMLHE	Q8BUR4_DOCK1	-0.824561	2.56082e-05	0.0094547
Q99M07_COA5	Q8BUR4_DOCK1	-0.93808	8.93749e-09	0.000172476
Q9CWD8_NUBPL	Q8BUR4_DOCK1	-0.872033	2.40176e-06	0.00323667
Q8VBV7_COPS8	Q8BUR4_DOCK1	-0.848735	8.47753e-06	0.00575689
Q99LB6_MAT2B	Q8BUR4_DOCK1	-0.863191	3.98148e-06	0.00409069
Q9CPZ8_CMC1	Q8BUR4_DOCK1	-0.894737	5.42211e-07	0.0015988
Q9D7P6_ISCU	Q8BUR4_DOCK1	-0.833247	1.7562e-05	0.00810038
Q9D7N3_MRPS9	Q8BUR4_DOCK1	-0.833247	1.7562e-05	0.00810038
Q9QX60_DGUOK	E9QJW0_MGST1	-0.830753	1.96126e-05	0.00842172
Q62234_MYOM1	F8WHU5_PDS5B	-0.888545	8.39466e-07	0.00195059
O70250_PGAM2	F8WHU5_PDS5B	-0.867905	3.05455e-06	0.00362045
P70296_PEBP1	F8WHU5_PDS5B	-0.892101	6.55184e-07	0.00174055
Q6P3A8_BCKDHB	F8WHU5_PDS5B	-0.868218	3.0002e-06	0.00362045
P28474_ADH5	F8WHU5_PDS5B	-0.861713	4.31768e-06	0.00423258
Q8R086_SUOX	F8WHU5_PDS5B	-0.827052	2.30314e-05	0.00910461
Q9JLV5_CUL3	F8WHU5_PDS5B	-0.824987	2.51511e-05	0.0094547
Q9WVQ5_APIP	F8WHU5_PDS5B	-0.905057	2.45589e-07	0.00107817
Q3TMH2_SCRN3	F8WHU5_PDS5B	-0.830753	1.96126e-05	0.00842172
A0A087WNT1_ELOC	F8WHU5_PDS5B	-0.841073	1.22714e-05	0.00682881
Q8CHP8_PGP	F8WHU5_PDS5B	-0.882353	1.26787e-06	0.00237858
Q3TIV5_ZC3H15	F8WHU5_PDS5B	-0.853457	6.68154e-06	0.00516327
Q8R3Q6_CCDC58	F8WHU5_PDS5B	-0.822497	2.79262e-05	0.00981518
Q99M07_COA5	F8WHU5_PDS5B	-0.872033	2.40176e-06	0.00323667
Q61941_NNT	Q9DBB9_CPN2	-0.906557	2.17265e-07	0.00100697
G5E902_SLC25A3	Q9DBB9_CPN2	-0.826873	2.32086e-05	0.00910461
Q8JZQ2_AFG3L2	Q9DBB9_CPN2	-0.889004	8.1343e-07	0.00195059
Q6PIE5_ATP1A2	Q9DBB9_CPN2	-0.83841	1.38926e-05	0.00722125
Q3ULF4_SPG7	Q9DBB9_CPN2	-0.844285	1.05344e-05	0.00639655
Q99JB8_PACSIN3	Q9DBB9_CPN2	-0.840475	1.26206e-05	0.00691676
P08752_GNAI2	Q9DBB9_CPN2	-0.831612	1.88851e-05	0.00835923
Q5SS83_FLOT2	Q9DBB9_CPN2	-0.881776	1.31599e-06	0.00242153
Q8C129_LNPEP	Q9DBB9_CPN2	-0.824987	2.51511e-05	0.0094547
P63094_GNAS	Q9DBB9_CPN2	-0.852865	6.88698e-06	0.00522979
Q8K1H7_TCP11L2	Q9DBB9_CPN2	-0.822922	2.74351e-05	0.00981518
H7BX95_SRSF1	Q9DBB9_CPN2	-0.863191	3.98148e-06	0.00409069
Q9QZ88-2_VPS29	Q9DBB9_CPN2	-0.827052	2.30314e-05	0.00910461
Q8BGA9_OXA1L	Q9DBB9_CPN2	-0.824987	2.51511e-05	0.0094547
Q920A7_AFG3L1	Q9DBB9_CPN2	-0.880744	1.40604e-06	0.00253446
J3QPG5_PSAP	O35382_EXOC4	-0.868353	2.977e-06	0.00361447
P58281-2_OPA1	Q8R1V4_TMED4	-0.826625	2.34566e-05	0.00910461
Q9Z0X1_AIFM1	Q8R1V4_TMED4	-0.844009	1.06748e-05	0.006459
P45376_AKR1B1	Q8R1V4_TMED4	-0.840475	1.26206e-05	0.00691676
P53395_DBT	Q8R1V4_TMED4	-0.828085	2.20301e-05	0.0088575
Q6P3A8_BCKDHB	Q8R1V4_TMED4	-0.882688	1.2406e-06	0.00237858
O88441_MTX2	Q8R1V4_TMED4	-0.861571	4.35134e-06	0.00424481
Q3TMH2_SCRN3	Q8R1V4_TMED4	-0.828689	2.14612e-05	0.00876563
O88545_COPS6	Q8R1V4_TMED4	-0.836345	1.52727e-05	0.00754118
P63028_TPT1	Q3ULW8_PARP3	-0.912752	1.2804e-07	0.00076599
Q01279_EGFR	Q3ULW8_PARP3	-0.830753	1.96126e-05	0.00842172
P20918_PLG	Q6PFB2_RCC1	-0.866736	3.26514e-06	0.00376924
E9QP99_GOLGA3	Q80UY1_CARNMT1	-0.853078	6.81247e-06	0.00522979
D3YYS6_MGLL	S4R270_BIN2	-0.85493	6.1928e-06	0.00498677
P51855_GSS	A0A0U1RNF2_LCMT1	-0.892284	6.46751e-07	0.00174055
P63325_RPS10	A0A0U1RNF2_LCMT1	-0.823074	2.72614e-05	0.00981518
Q8C0L8_COG5	A0A0U1RNF2_LCMT1	-0.837644	1.43915e-05	0.00742932
A0A0A0MQF5_OTUD6B	A0A0U1RNF2_LCMT1	-0.850054	7.93882e-06	0.00565758
O54962_BANF1	Q8BIP0_DARS2	-0.866014	3.40114e-06	0.0038229
Q9WV02_RBMX	Q8BIP0_DARS2	-0.838078	1.41068e-05	0.00731645
Q9JKY5_HIP1R	Q8BIP0_DARS2	-0.83023	2.00684e-05	0.00851357
F8WHU5_PDS5B	Q8BIP0_DARS2	-0.83187	1.86703e-05	0.00830293
P63028_TPT1	Q8VBW6_NAE1	-0.887855	8.79941e-07	0.00199429
Q8VDQ1_PTGR2	E9Q0F0_KRT78	-0.825414	2.47002e-05	0.00938355
P54823_DDX6	E9Q0F0_KRT78	-0.824561	2.56082e-05	0.0094547
Q9CWD8_NUBPL	E9Q0F0_KRT78	-0.843137	1.1129e-05	0.00652285
Q8R1I1_UQCR10	P17439_GBA	-0.8508	7.64686e-06	0.0054956
Q5SUR0_PFAS	G3UW82_MYH2	-0.836777	1.49744e-05	0.00747811
E9PXY8_USP7	G3UW82_MYH2	-0.870801	2.58262e-06	0.00337739
Q924M7_MPI	Q9Z2A9_GGT5	-0.834881	1.63204e-05	0.00778112
P61089_UBE2N	Q9Z2A9_GGT5	-0.847265	9.11495e-06	0.0059435
Q6P3A8_BCKDHB	Q9Z2A9_GGT5	-0.821706	2.88608e-05	0.00998363
P47809_MAP2K4	Q9Z2A9_GGT5	-0.848735	8.47753e-06	0.00575689
Q9Z1R2_BAG6	P63030_MPC1	-0.822497	2.79262e-05	0.00981518
Q9QZE5_COPG1	P63030_MPC1	-0.82602	2.40713e-05	0.00920404
Q9Z247_FKBP9	P63030_MPC1	-0.836945	1.48599e-05	0.00745234
Q9JI91_ACTN2	Q9DAU1_CNPY3	-0.84695	9.25695e-06	0.00599601
Q9DC70_NDUFS7	Q9DAU1_CNPY3	-0.833247	1.7562e-05	0.00810038
Q9JLV5_CUL3	Q9DAU1_CNPY3	-0.852789	6.91379e-06	0.00524733
Q99M07_COA5	Q9DAU1_CNPY3	-0.843573	1.09e-05	0.00652285
Q8BIP0_DARS2	Q9DAU1_CNPY3	-0.821948	2.85726e-05	0.00992501
Q9D1P4_CHORDC1	Q9JI78_NGLY1	-0.827052	2.30314e-05	0.00910461
D3YYS6_MGLL	Q9QUM0_ITGA2B	-0.872033	2.40176e-06	0.00323667
Q9JI91_ACTN2	P35821_PTPN1	-0.854706	6.2653e-06	0.00503484
Q62234_MYOM1	P35821_PTPN1	-0.848735	8.47753e-06	0.00575689
P70296_PEBP1	P35821_PTPN1	-0.856405	5.73468e-06	0.00485964
Q3URE1_ACSF3	P35821_PTPN1	-0.853898	6.53199e-06	0.00516327
Q6P3A8_BCKDHB	P35821_PTPN1	-0.877974	1.67431e-06	0.00272441
P28474_ADH5	P35821_PTPN1	-0.840475	1.26206e-05	0.00691676
Q8VE38_OXNAD1	P35821_PTPN1	-0.824987	2.51511e-05	0.0094547
Q9JLV5_CUL3	P35821_PTPN1	-0.879649	1.50727e-06	0.00258854
Q9WVQ5_APIP	P35821_PTPN1	-0.83841	1.38926e-05	0.00722125
Q9CR98_FAM136A	P35821_PTPN1	-0.843687	1.08405e-05	0.00652285
E9QM77_ATXN2	P35821_PTPN1	-0.840827	1.24142e-05	0.00687628
A0A087WNT1_ELOC	P35821_PTPN1	-0.833247	1.7562e-05	0.00810038
P11930_NUDT19	P35821_PTPN1	-0.849174	8.29505e-06	0.0057037
Q99M07_COA5	P35821_PTPN1	-0.933402	1.57681e-08	0.000239512
Q9CPZ8_CMC1	P35821_PTPN1	-0.83428	1.67683e-05	0.00786974
Q8VEA4_CHCHD4	P35821_PTPN1	-0.824987	2.51511e-05	0.0094547
Q8BIP0_DARS2	P35821_PTPN1	-0.840582	1.25579e-05	0.00691676
P58281-2_OPA1	Q6P8J2_SAT2	-0.883841	1.15069e-06	0.0022673
Q91VA7_IDH3B	Q6P8J2_SAT2	-0.823773	2.64738e-05	0.00961877
P45376_AKR1B1	Q6P8J2_SAT2	-0.889979	7.60374e-07	0.00186753
Q8K0D5_GFM1	Q6P8J2_SAT2	-0.867321	3.15826e-06	0.0036745
Q8R5L1_C1QBP	Q6P8J2_SAT2	-0.828085	2.20301e-05	0.0088575
P53395_DBT	Q6P8J2_SAT2	-0.86157	4.35145e-06	0.00424481
Q9WTP6_AK2	Q6P8J2_SAT2	-0.844525	1.04133e-05	0.00633517
P32020_SCP2	Q6P8J2_SAT2	-0.824987	2.51511e-05	0.0094547
Q6P3A8_BCKDHB	Q6P8J2_SAT2	-0.944158	3.98765e-09	0.00010168
O88441_MTX2	Q6P8J2_SAT2	-0.887339	9.11373e-07	0.00205445
[truncated: 8,339 more rows]

## Sheet: c. Pertubed proteins
c. Enrichment of pertubed proteins inferred from positive and negative co-regulations in different groups
Group	Pertubred Proteins	Perturbed samples in each group	p value	Pertubation
AL	A0A1B0GSX0_LDHA	3	0.00490196	Positive
AL	A2A5Y6_MAPT	2	0.0392157	Positive
AL	D3Z0X5_PHLDB1	2	0.0392157	Positive
AL	F8WIV2_SERPINB6A	3	0.0441176	Positive
AL	O55234_PSMB5	3	0.00490196	Positive
AL	O89079_COPE	4	0.0411765	Positive
AL	P12382_PFKL	3	0.0441176	Positive
AL	P21956_MFGE8	2	0.0392157	Positive
AL	P28653_BGN	3	0.0441176	Positive
AL	P37889_FBLN2	3	0.0441176	Positive
AL	P51885_LUM	4	0.0114379	Positive
AL	P52196_TST	2	0.0392157	Positive
AL	P61027_RAB10	3	0.0441176	Positive
AL	P97930_DTYMK	2	0.0392157	Positive
AL	Q3TJD7_PDLIM7	2	0.0392157	Positive
AL	Q60823_AKT2	4	0.0228758	Positive
AL	Q61753_PHGDH	3	0.0441176	Positive
AL	Q8CI94_PYGB	3	0.0441176	Positive
AL	Q8R3U1-2_PLA2G16	2	0.0392157	Positive
AL	Q99KP3_CRYL1	2	0.0392157	Positive
AL	Q9DCN1_NUDT12	2	0.0392157	Positive
AL	Q9JI59_JAM2	3	0.0186275	Positive
AL	Q9Z1J3_NFS1	3	0.0186275	Positive
AL	A2ADW8_GM15128	2	0.0392157	Positive
AL	F8VQL9_NCOR2	2	0.0392157	Positive
AL	Q8C167_PREPL	3	0.0441176	Positive
AL	P51881_SLC25A5	2	0.0392157	Negative
AL	Q8BGA9_OXA1L	3	0.0441176	Negative
AL	Q8BH74_NUP107	2	0.0392157	Negative
AL	Q8BMS1_HADHA	2	0.0392157	Negative
AL	Q8VE95_	2	0.0392157	Negative
AL	Q99LB2_DHRS4	2	0.0392157	Negative
AL	E9QLK9_SNAP91	2	0.0392157	Negative
AL	Q9CXL3_	2	0.0392157	Negative
IF12	A0A087WQS2_BZW1	5	0.0294118	Positive
IF12	A2AH25_ARHGAP1	3	0.0441176	Positive
IF12	E9QN63_ASAP1	3	0.0122549	Positive
IF12	P45952_ACADM	3	0.0441176	Positive
IF12	P62737_ACTA2	4	0.0217087	Positive
IF12	P97449_ANPEP	5	0.0294118	Positive
IF12	Q8VCG1_DUT	3	0.0441176	Positive
IF12	Q99MN9_PCCB	4	0.0217087	Positive
IF12	Q9CXC3_MGME1	3	0.0122549	Positive
IF12	Q9CZ13_UQCRC1	4	0.00770308	Positive
IF12	Q9DCM2_GSTK1	3	0.0441176	Positive
IF12	Q9JJT9_PHAX	3	0.0441176	Positive
IF12	Q9Z1Q5_CLIC1	3	0.0441176	Positive
IF12	A3KGV1_ODF2	3	0.0441176	Positive
IF12	P16254_SRP14	3	0.0122549	Positive
IF12	B1APX2_5031439G07RIK	4	0.0473856	Negative
IF12	G5E8I8_CHERP	3	0.0441176	Negative
IF12	P56213_GFER	5	0.00653595	Negative
IF12	Q3TTF2_UBXN8	4	0.0473856	Negative
IF12	Q8BFW4_TRIM65	3	0.0441176	Negative
IF12	Q9ERE7_MESD	5	0.00245098	Negative
IF12	Q9Z0W3_NUP160	3	0.0441176	Negative
IF12	Q7TQI7_ABTB2	3	0.0122549	Negative
IF12	Q8BTY8_SCFD2	3	0.0441176	Negative
IF16	A0A0R4J0M1_TBCC	3	0.0441176	Positive
IF16	A2AQ07_TUBB1	5	0.0294118	Positive
IF16	D3YTT6_OSBPL3	4	0.0217087	Positive
IF16	D6RI20_HDHD2	4	0.0217087	Positive
IF16	E9Q8N8_SLC4A4	4	0.0217087	Positive
IF16	E9Q8Q6_CCDC141	3	0.0441176	Positive
IF16	G3UWC2_NAALAD2	3	0.0441176	Positive
IF16	G3X8T3_CTSA	3	0.0122549	Positive
IF16	O35099_MAP3K5	4	0.00163399	Positive
IF16	O35382_EXOC4	4	0.0473856	Positive
IF16	O35969-2_GAMT	4	0.0473856	Positive
IF16	O54890_ITGB3	5	0.0147059	Positive
IF16	P02104_HBB-Y	3	0.0441176	Positive
IF16	P15327_BPGM	3	0.0122549	Positive
IF16	P25911_LYN	4	0.0473856	Positive
IF16	P38647_HSPA9	3	0.0441176	Positive
IF16	P39655_ALOX12	5	0.0147059	Positive
IF16	P58022_LOXL2	4	0.00770308	Positive
IF16	P60710_ACTB	4	0.0473856	Positive
IF16	P80313_CCT7	3	0.0441176	Positive
IF16	Q01730_RSU1	3	0.0441176	Positive
IF16	Q07456_AMBP	3	0.0441176	Positive
IF16	Q3UM45_PPP1R7	3	0.0441176	Positive
IF16	Q4VA93_PRKCA	4	0.0217087	Positive
IF16	Q58A65_SPAG9	3	0.0122549	Positive
IF16	Q5SUD5_SCO1	3	0.0441176	Positive
IF16	Q5SUR0_PFAS	3	0.0122549	Positive
IF16	Q61335_BCAP31	4	0.0473856	Positive
IF16	Q64339_ISG15	4	0.0217087	Positive
IF16	Q6ZWQ9_MYL12A	3	0.0441176	Positive
IF16	Q7TQ95_LNPK	3	0.0441176	Positive
IF16	Q8BGR9_UBLCP1	4	0.0473856	Positive
IF16	Q8CGC7_EPRS	3	0.0441176	Positive
IF16	Q8K0V4_CNOT3	3	0.0441176	Positive
IF16	Q8K558-2_TREML1	3	0.0441176	Positive
IF16	Q8VBW6_NAE1	3	0.0122549	Positive
IF16	Q8VEH3_ARL8A	3	0.0441176	Positive
IF16	Q91V79_FITM1	4	0.0473856	Positive
IF16	Q923D2_BLVRB	3	0.0441176	Positive
IF16	Q99J39_MLYCD	3	0.0441176	Positive
IF16	Q9CPW9_METAP1D	3	0.0441176	Positive
IF16	Q9CQ69_UQCRQ	4	0.00163399	Positive
IF16	Q9D379_EPHX1	3	0.0441176	Positive
IF16	Q9D517_AGPAT3	3	0.0441176	Positive
IF16	Q9D6U8_FAM162A	3	0.0441176	Positive
IF16	Q9DBB5_EIF4E3	3	0.0441176	Positive
IF16	Q9JHK5_PLEK	4	0.0473856	Positive
IF16	Q9QUM0_ITGA2B	4	0.0217087	Positive
IF16	Q9QYB8_ADD2	4	0.0473856	Positive
IF16	Q9WUZ7_SH3BGR	3	0.0122549	Positive
IF16	Q9Z1Y4_TRIP6	4	0.0473856	Positive
IF16	P0DOV1_MNDA	3	0.0122549	Positive
IF16	P14434_H2-AA	4	0.0217087	Positive
IF16	Q3U2V3_NUDT18	4	0.0473856	Positive
IF16	Q5SYL3_KIAA0100	3	0.0441176	Positive
IF16	A0A1Y7VNZ6_MARK3	4	0.0473856	Negative
IF16	K3W4S4_MAPK8IP3	3	0.0441176	Negative
IF16	P47757-4_CAPZB	4	0.00770308	Negative
IF16	P61226_RAP2B	3	0.0441176	Negative
IF16	Q6GQT9_NOMO1	4	0.00770308	Negative
IF16	Q8VHE0_SEC63	3	0.0441176	Negative
IF16	Q9D2U5_NAA38	3	0.0122549	Negative
IF16	Q9DBB5_EIF4E3	4	0.0473856	Negative
IF16	Q9DCD6_GABARAP	3	0.0441176	Negative
IF16	Q9JJV2_PFN2	4	0.00770308	Negative
IF16	Q9WTX5_SKP1	3	0.0441176	Negative
IF16	Q9WUA5_EPM2A	3	0.0441176	Negative
IF16	Q7TN79_AKAP7	3	0.0122549	Negative
IF16	Q9D385_ARL2BP	3	0.0122549	Negative
EOD	A0A075B5R9_IGHV14-3	2	0.0392157	Positive
EOD	A0A0G2JE99_IGLC1	2	0.0392157	Positive
EOD	A0A0R4J0G0_PCK2	2	0.0392157	Positive
EOD	B1APX2_5031439G07RIK	3	0.00490196	Positive
EOD	E9QPX3_NDUFS4	2	0.0392157	Positive
EOD	E9QQ96_OBSCN	2	0.0392157	Positive
EOD	G5E902_SLC25A3	4	0.0228758	Positive
EOD	H3BJ07_GOLPH3L	2	0.0392157	Positive
EOD	O08848_TROVE2	3	0.0441176	Positive
EOD	O88811_STAM2	2	0.0392157	Positive
EOD	P00416_MT-CO3	2	0.0392157	Positive
EOD	P02301_H3F3C	3	0.0186275	Positive
EOD	P03930_MTATP8	4	0.0228758	Positive
EOD	P11404_FABP3	2	0.0392157	Positive
EOD	P26039_TLN1	4	0.0411765	Positive
EOD	P32020_SCP2	4	0.0411765	Positive
EOD	P46664_ADSS	4	0.0228758	Positive
EOD	P47754_CAPZA2	2	0.0392157	Positive
EOD	P47809_MAP2K4	2	0.0392157	Positive
EOD	P53762_ARNT	2	0.0392157	Positive
EOD	P61965_WDR5	2	0.0392157	Positive
EOD	P62631_EEF1A2	3	0.0186275	Positive
EOD	P67778_PHB	2	0.0392157	Positive
EOD	P97825_JPT1	2	0.0392157	Positive
EOD	Q3TMX5_MANF	4	0.00490196	Positive
EOD	Q3U186_RARS2	2	0.0392157	Positive
EOD	Q61792_LASP1	4	0.0411765	Positive
EOD	Q62261-2_SPTBN1	2	0.0392157	Positive
EOD	Q62318_TRIM28	2	0.0392157	Positive
EOD	Q62348_TSN	3	0.0441176	Positive
EOD	Q6NSR8_NPEPL1	2	0.0392157	Positive
EOD	Q80X71_TMEM106B	3	0.0441176	Positive
EOD	Q80Y81_ELAC2	2	0.0392157	Positive
EOD	Q8BGT6_MICALL1	2	0.0392157	Positive
EOD	Q8BLY7_HPS6	3	0.0441176	Positive
EOD	Q8BX94_OSBPL2	4	0.0411765	Positive
EOD	Q8C3W1_	3	0.0186275	Positive
EOD	Q8CDN6_TXNL1	2	0.0392157	Positive
EOD	Q8CF89_TAB1	2	0.0392157	Positive
EOD	Q8JZQ2_AFG3L2	4	0.0114379	Positive
EOD	Q8K126_MTRF1	2	0.0392157	Positive
EOD	Q8K1H7_TCP11L2	3	0.0186275	Positive
EOD	Q8K212_PACS1	3	0.0441176	Positive
EOD	Q8K2L8_TRAPPC12	2	0.0392157	Positive
EOD	Q8K2M0_MRPL38	3	0.00490196	Positive
EOD	Q8R5F3_OARD1	3	0.00490196	Positive
EOD	Q8VD75_HIP1	3	0.0186275	Positive
EOD	Q91VC3_EIF4A3	2	0.0392157	Positive
EOD	Q91XD7_CRELD1	2	0.0392157	Positive
EOD	Q921H9_COA7	3	0.0441176	Positive
EOD	Q99KC8_VWA5A	2	0.0392157	Positive
EOD	Q99KH8_STK24	2	0.0392157	Positive
EOD	Q99LB2_DHRS4	4	0.0411765	Positive
EOD	Q99LM2_CDK5RAP3	2	0.0392157	Positive
EOD	Q9D338_MRPL19	3	0.00490196	Positive
EOD	Q9DB77_UQCRC2	4	0.000326797	Positive
EOD	Q9EPC1_PARVA	2	0.0392157	Positive
EOD	Q9EQC8_PRCC	3	0.0186275	Positive
EOD	Q9ERU9_RANBP2	2	0.0392157	Positive
EOD	Q9JHS4_CLPX	3	0.0186275	Positive
EOD	Q9JIY5_HTRA2	3	0.0441176	Positive
EOD	Q9JKF7_MRPL39	3	0.00490196	Positive
EOD	Q9JLB2_MPP5	2	0.0392157	Positive
EOD	Q9QY93_DCTPP1	3	0.0441176	Positive
EOD	Q9R045_ANGPTL2	2	0.0392157	Positive
EOD	Q9R0N0_GALK1	2	0.0392157	Positive
EOD	Q9R1T2_SAE1	2	0.0392157	Positive
EOD	Q9WVA3_BUB3	2	0.0392157	Positive
EOD	Q9Z1P7_KANK3	3	0.00490196	Positive
EOD	Q9Z2A0_PDPK1	2	0.0392157	Positive
EOD	Q9Z2Q5_MRPL40	3	0.0441176	Positive
EOD	A0A140LIU4_COX7A1	2	0.0392157	Positive
EOD	A2A5J5_NEURL2	2	0.0392157	Positive
EOD	O35286_DHX15	2	0.0392157	Positive
EOD	P52624_UPP1	2	0.0392157	Positive
EOD	P83917_CBX1	2	0.0392157	Positive
EOD	Q8BFS6_CPPED1	2	0.0392157	Positive
EOD	Q8BT51_COA4	2	0.0392157	Positive
EOD	Q8K2T4_UQCC3	2	0.0392157	Positive
EOD	Q91VJ5_PQBP1	3	0.0186275	Positive
EOD	Q91WK1_SPRYD4	2	0.0392157	Positive
EOD	Q9D2V5_AAR2	2	0.0392157	Positive
EOD	Q9Z1W9_STK39	2	0.0392157	Positive
EOD	A0A0A0MQF5_OTUD6B	4	0.0228758	Negative
EOD	A0A0R4J1W7_CDC23	2	0.0392157	Negative
EOD	A0JNY3_GPHN	3	0.0186275	Negative
EOD	A6X940_FERMT2	3	0.0186275	Negative
EOD	E9PVZ8_GOLGB1	2	0.0392157	Negative
EOD	E9QB02_MARS	2	0.0392157	Negative
EOD	H7BX95_SRSF1	3	0.0441176	Negative
EOD	O35855_BCAT2	2	0.0392157	Negative
EOD	P08074_CBR2	3	0.0441176	Negative
EOD	P10518_ALAD	4	0.0411765	Negative
EOD	P14434_H2-AA	4	0.0114379	Negative
EOD	P21460_CST3	2	0.0392157	Negative
EOD	P50462_CSRP3	3	0.0186275	Negative
EOD	Q00623_APOA1	2	0.0392157	Negative
EOD	Q05020_APOC2	2	0.0392157	Negative
EOD	Q3UJU9_RMDN3	2	0.0392157	Negative
EOD	Q3UVK0_ERMP1	2	0.0392157	Negative
EOD	Q5SVT2_TRIM16	3	0.0186275	Negative
EOD	Q6PGC1_DHX29	2	0.0392157	Negative
EOD	Q8BNY6_NCS1	3	0.0186275	Negative
EOD	Q8CGB6-3_TNS2	2	0.0392157	Negative
EOD	Q8CJG1_AGO1	4	0.0228758	Negative
EOD	Q99JY8_PLPP3	3	0.00490196	Negative
EOD	Q9EP52_TWSG1	4	0.0228758	Negative
EOD	Q9WTI7_MYO1C	3	0.0186275	Negative
EOD	Q9WUB3_PYGM	2	0.0392157	Negative
EOD	Q9Z160_COG1	2	0.0392157	Negative
EOD	Q9Z1A9_TBC1D8	2	0.0392157	Negative
EOD	Q9Z1Q9_VARS	2	0.0392157	Negative
EOD	A6H8H2-2_DENND4C	3	0.00490196	Negative
EOD	B2RXS4_PLXNB2	2	0.0392157	Negative
EOD	O55022_PGRMC1	2	0.0392157	Negative
EOD	P07361_ORM2	3	0.0441176	Negative
EOD	Q8CIB5_FERMT2	2	0.0392157	Negative
EOD	Q8JZX5_LRRC57	2	0.0392157	Negative
IF12-IF16-EOD	A2BI80_EBF4	9	0.0411765	Positive
IF12-IF16-EOD	B2RXS4_PLXNB2	9	0.0411765	Positive
IF12-IF16-EOD	B2RY56_RBM25	9	0.0411765	Positive
IF12-IF16-EOD	E9Q1Q9_KHK	9	0.0411765	Positive
IF12-IF16-EOD	P63321_RALA	14	0.0392157	Positive
IF12-IF16-EOD	Q62093_SRSF2	12	0.0441176	Positive
IF12-IF16-EOD	Q80Y14_GLRX5	12	0.0441176	Positive
IF12-IF16-EOD	Q9EP52_TWSG1	9	0.0411765	Positive
IF12-IF16-EOD	Q9ET30_TM9SF3	12	0.0441176	Positive
IF12-IF16-EOD	E9Q8I9-2_FRY	9	0.0411765	Negative
IF12-IF16-EOD	P10518_ALAD	9	0.0411765	Negative
IF12-IF16-EOD	Q99KL7_RAB28	9	0.0411765	Negative
IF12-IF16-EOD	Q9WVQ5_APIP	9	0.0411765	Negative
IF16-EOD	D3YVW2_GOLIM4	4	0.0411765	Positive
IF16-EOD	H7BX95_SRSF1	4	0.0411765	Positive
IF16-EOD	O35099_MAP3K5	4	0.0411765	Positive
IF16-EOD	O54890_ITGB3	7	0.0283422	Positive
IF16-EOD	O88533_DDC	4	0.0411765	Positive
IF16-EOD	P02301_H3F3C	4	0.0411765	Positive
IF16-EOD	P03930_MTATP8	7	0.00761004	Positive
IF16-EOD	P09242_ALPL	4	0.0411765	Positive
IF16-EOD	P25911_LYN	6	0.0248869	Positive
IF16-EOD	P26039_TLN1	7	0.0283422	Positive
IF16-EOD	P38647_HSPA9	4	0.0411765	Positive
IF16-EOD	P39655_ALOX12	7	0.0283422	Positive
IF16-EOD	P40336-2_VPS26A	4	0.0411765	Positive
IF16-EOD	P51881_SLC25A5	4	0.0411765	Positive
IF16-EOD	P58022_LOXL2	5	0.0147059	Positive
IF16-EOD	P83887_TUBG1	4	0.0411765	Positive
IF16-EOD	Q01730_RSU1	4	0.0411765	Positive
IF16-EOD	Q3TMX5_MANF	6	0.00452489	Positive
IF16-EOD	Q3ULF4_SPG7	4	0.0411765	Positive
IF16-EOD	Q5SS83_FLOT2	9	0.0411765	Positive
IF16-EOD	Q61792_LASP1	7	0.0283422	Positive
IF16-EOD	Q6P5F9_XPO1	4	0.0411765	Positive
IF16-EOD	Q6ZWQ9_MYL12A	4	0.0411765	Positive
IF16-EOD	Q791T5_MTCH1	4	0.0411765	Positive
IF16-EOD	Q80X71_TMEM106B	5	0.0147059	Positive
IF16-EOD	Q80YQ1_THBS1	7	0.0283422	Positive
IF16-EOD	Q8C3W1_	4	0.0411765	Positive
IF16-EOD	Q8CGB6-3_TNS2	4	0.0411765	Positive
IF16-EOD	Q8CGC7_EPRS	4	0.0411765	Positive
IF16-EOD	Q8JZQ2_AFG3L2	6	0.0248869	Positive
IF16-EOD	Q8K0V4_CNOT3	4	0.0411765	Positive
IF16-EOD	Q8K1H7_TCP11L2	4	0.0411765	Positive
IF16-EOD	Q8K212_PACS1	5	0.0147059	Positive
IF16-EOD	Q8VD75_HIP1	4	0.0411765	Positive
IF16-EOD	Q91V79_FITM1	6	0.0248869	Positive
IF16-EOD	Q99J39_MLYCD	4	0.0411765	Positive
IF16-EOD	Q9CPQ1_COX6C	5	0.0147059	Positive
IF16-EOD	Q9CQ69_UQCRQ	4	0.0411765	Positive
IF16-EOD	Q9CZX0-2_ELP3	4	0.0411765	Positive
IF16-EOD	Q9D009_LIPT2	4	0.0411765	Positive
IF16-EOD	Q9D517_AGPAT3	4	0.0411765	Positive
IF16-EOD	Q9DB77_UQCRC2	4	0.0411765	Positive
IF16-EOD	Q9EQH3_VPS35	4	0.0411765	Positive
IF16-EOD	Q9JIX8_ACIN1	6	0.0248869	Positive
IF16-EOD	Q9Z1Y4_TRIP6	6	0.0248869	Positive
IF16-EOD	Q504M2_PDP2	4	0.0411765	Positive
IF16-EOD	Q5SYL3_KIAA0100	4	0.0411765	Positive
IF16-EOD	Q91VJ5_PQBP1	4	0.0411765	Positive
IF16-EOD	Q9DCF9_SSR3	5	0.0147059	Positive
IF16-EOD	A0A0A0MQF5_OTUD6B	7	0.00761004	Negative
IF16-EOD	A0A0R4J050_ACY1	4	0.0411765	Negative
IF16-EOD	A0JNY3_GPHN	4	0.0411765	Negative
IF16-EOD	E9PX24_LYRM9	5	0.0147059	Negative
IF16-EOD	E9PXD2_DLC1	4	0.0411765	Negative
IF16-EOD	E9PXR3_SESN1	4	0.0411765	Negative
IF16-EOD	E9QML5_ZFP638	6	0.0248869	Negative
IF16-EOD	K3W4S4_MAPK8IP3	4	0.0411765	Negative
IF16-EOD	P14434_H2-AA	6	0.0248869	Negative
IF16-EOD	P46737_BRCC3	6	0.0248869	Negative
IF16-EOD	P50462_CSRP3	4	0.0411765	Negative
IF16-EOD	P97742_CPT1A	4	0.0411765	Negative
IF16-EOD	Q5SVT2_TRIM16	4	0.0411765	Negative
IF16-EOD	Q8BGD8_COA6	4	0.0411765	Negative
IF16-EOD	Q8BUL6_PLEKHA1	4	0.0411765	Negative
IF16-EOD	Q8VHE0_SEC63	4	0.0411765	Negative
IF16-EOD	Q9DB10_SMDT1	4	0.0411765	Negative
IF16-EOD	Q9WUA5_EPM2A	4	0.0411765	Negative
IF16-EOD	Q9Z2Q6_SEPT5	6	0.0248869	Negative
IF16-EOD	P07361_ORM2	5	0.0147059	Negative

## Sheet: d. Mitochondrial proteins
d. Perturbed mitochondrial proteins across different dietary groups
Perturbed Mitochondrial Protein	Diet Regimen
HADHA	AL
NFS1	AL
OXA1L	AL
SLC25A5	AL
TST	AL
ACADM	IF12
GSTK1	IF12
GFER	IF12
MGME1	IF12
PCCB	IF12
UQCRC1	IF12
ARL2BP	IF16
SCO1	IF16
FAM162A	IF16
HSPA9	IF16
MLYCD	IF16
METAP1D	IF16
PRKCA	IF16
UQCRQ	IF16
AFG3L2	EOD
HTRA2	EOD
NDUFS4	EOD
RARS2	EOD
BCAT2	EOD
CBR2	EOD
CLPX	EOD
COA4	EOD
COA7	EOD
COX7A1	EOD
ELAC2	EOD
MRPL19	EOD
MRPL38	EOD
MRPL39	EOD
MRPL40	EOD
MTRF1	EOD
PCK2	EOD
PHB	EOD
RMDN3	EOD
SLC25A3	EOD
SCP2	EOD
UQCRC2	EOD
UQCC3	EOD
