# Supplementary material for: Multiomics Analyses Reveal Dynamic Bioenergetic Pathways and Functional Remodeling of the Heart During Intermittent Fasting
Source: bioRxiv preprint, doi:10.1101/2021.03.04.433999, version 2 (2023-05-07)
Supplement: Supplementary Table 8 [file 433999_file27.xlsx]

## Sheet: a. Phospho (STY)Sites
Table S8: Quantitative phosphoproteome of heart tissues across different dietary groups.
a. List of all identified phopshorylation sites in heart tissues among different dietary groups
Proteins	Positions within proteins	Leading proteins	Protein	Protein names	Gene names	Fasta headers	Localization prob	Score diff	PEP	Score	Delta score	Score for localization	Localization prob AL #1	Score diff AL #1	PEP AL #1	Score AL #1	Localization prob AL #2	Score diff AL #2	PEP AL #2	Score AL #2	Localization prob AL #4	Score diff AL #4	PEP AL #4	Score AL #4	Localization prob IF12 #1	Score diff IF12 #1	PEP IF12 #1	Score IF12 #1	Localization prob IF12 #2	Score diff IF12 #2	PEP IF12 #2	Score IF12 #2	Localization prob IF12 #3	Score diff IF12 #3	PEP IF12 #3	Score IF12 #3	Localization prob IF16 #1	Score diff IF16 #1	PEP IF16 #1	Score IF16 #1	Localization prob IF16 #2	Score diff IF16 #2	PEP IF16 #2	Score IF16 #2	Localization prob IF16 #4	Score diff IF16 #4	PEP IF16 #4	Score IF16 #4	Localization prob IF24 #1
Q3UTY5;Q3UWJ5;A2ADP2;Q8CDM3;A0A067XG46;Q9R0X5-2;Q9R0X5	562;657;657;950;950;619;912	Q3UTY5	Q3UTY5	X-linked retinitis pigmentosa GTPase regulator	Rpgr		0.249981	0	0.00126485	42.556	32.269	42.556	0	0		NaN	0	0		NaN	0	0		NaN	0.249981	0	0.00126485	42.556
Q3UTY5;Q3UWJ5;A2ADP2;Q8CDM3;A0A067XG46;Q9R0X5-2;Q9R0X5	563;658;658;951;951;620;913	Q3UTY5	Q3UTY5	X-linked retinitis pigmentosa GTPase regulator	Rpgr		0.249981	0	0.00126485	42.556	32.269	42.556	0	0		NaN	0	0		NaN	0	0		NaN	0.249981	0	0.00126485	42.556
Q3UTY5;Q3UWJ5;A2ADP2;Q8CDM3;A0A067XG46;Q9R0X5-2;Q9R0X5	564;659;659;952;952;621;914	Q3UTY5	Q3UTY5	X-linked retinitis pigmentosa GTPase regulator	Rpgr		0.249981	0	0.00126485	42.556	32.269	42.556	0	0		NaN	0	0		NaN	0	0		NaN	0.249981	0	0.00126485	42.556
Q3UTY5;Q3UWJ5;A2ADP2;Q8CDM3;A0A067XG46;Q9R0X5-2;Q9R0X5	565;660;660;953;953;622;915	Q3UTY5	Q3UTY5	X-linked retinitis pigmentosa GTPase regulator	Rpgr		0.249981	0	0.00126485	42.556	32.269	42.556	0	0		NaN	0	0		NaN	0	0		NaN	0.249981	0	0.00126485	42.556
A0A067XG49;F6QYS7;Q8VHG2;F6YMV1;Q8VHG2-2	302;494;691;510;691	A0A067XG49	A0A067XG49	Angiomotin	Amot		0.453503	0	4.46538e-09	67.418	58.416	67.418	0.453503	0	4.46538e-09	67.418	0.268452	0	9.9578e-06	46.027	0.291195	0	1.13313e-08	58.284													0.286685	0	1.11824e-08	59.512	0	0		NaN	0	0		NaN
A0A067XG49;F6QYS7;Q8VHG2;F6YMV1;Q8VHG2-2	304;496;693;512;693	A0A067XG49	A0A067XG49	Angiomotin	Amot		0.453503	0	4.46538e-09	67.418	58.416	67.418	0.453503	0	4.46538e-09	67.418	0.268452	0	9.9578e-06	46.027	0.291195	0	1.13313e-08	58.284													0.286685	0	1.11824e-08	59.512	0	0		NaN	0	0		NaN
A0A067XG49;F6QYS7;Q8VHG2	694;886;1083	A0A067XG49	A0A067XG49	Angiomotin	Amot		0.808775	6.2703	4.82654e-05	40.986	34.41	40.986					0	0		NaN
A0A067XG53;O70589-3	544;570	A0A067XG53	A0A067XG53		Cask		0.48574	0	9.71592e-11	85.845	75.613	67.252	0.461446	0	1.12744e-05	73.466					0.460844	0	0.000532383	45.257	0.335979	0	9.71592e-11	85.845	0.450727	0	0.00073408	43.544	0.441041	0	0.000139531	56.205	0.449394	0	1.10165e-07	77.597	0.48574	0	6.94108e-05	67.252	0.469459	0	0.000531182	45.28
A0A067XG53;O70589-3	545;571	A0A067XG53	A0A067XG53		Cask		0.785089	6.75499	3.44978e-15	94.402	85.448	94.402	0.461446	0	1.12744e-05	73.466					0.460844	0	0.000532383	45.257	0.335979	0	9.71592e-11	85.845	0.450727	0	0.00073408	43.544	0.441041	0	0.000139531	56.205	0.449394	0	1.10165e-07	77.597	0.48574	0	6.94108e-05	67.252	0.469459	0	0.000531182	45.28	0.785089
A0A075B6D7;P59644	266;266	A0A075B6D7	A0A075B6D7	Phosphatidylinositol 4,5-bisphosphate 5-phosphatase A	Inpp5j		0.960709	13.883	2.86964e-07	108.35	70.799	108.35	0.960709	13.883	2.86964e-07	108.35					0	0		NaN	0	0		NaN	0	0		NaN	0.851453	7.58297	5.85586e-07	94.767	0	0		NaN	0.791734	5.7996	0.0010519	59.367	0	0		NaN
A0A087WNU6;E9Q9T1;A0A087WPK3;Q3UZ39-2	220;175;210;175	A0A087WNU6	A0A087WNU6	Leucine-rich repeat flightless-interacting protein 1	Lrrfip1		0.990541	21.564	7.07207e-05	60.541	54.922	60.541	0	0		NaN	0	0		NaN	0	0		NaN	0	0		NaN	0	0		NaN									0	0		NaN	0	0		NaN	0.990541
A0A087WNU6;E9Q9T1;A0A087WPK3;Q3UZ39-2	203;158;193;158	A0A087WNU6	A0A087WNU6	Leucine-rich repeat flightless-interacting protein 1	Lrrfip1		0.49998	0	2.36281e-05	65.563	49.672	62.088									0.498905	0	0.00923579	41.644	0.499777	0	2.36281e-05	65.563																					0.49998
A0A087WNU6;E9Q9T1;A0A087WPK3;Q3UZ39-2	204;159;194;159	A0A087WNU6	A0A087WNU6	Leucine-rich repeat flightless-interacting protein 1	Lrrfip1		0.49998	0	2.36281e-05	65.563	49.672	62.088									0.498905	0	0.00923579	41.644	0.499777	0	2.36281e-05	65.563																					0.49998
A0A087WNU6;E9Q9T1;A0A087WPK3;Q3UZ39-2;A0A087WSF5	242;197;232;197;159	A0A087WNU6	A0A087WNU6	Leucine-rich repeat flightless-interacting protein 1	Lrrfip1		1	53.9665	0.0118142	53.967	44.013	53.967	0	0		NaN									1	53.9665	0.0118142	53.967									0	0		NaN
A0A087WNU6;E9Q9T1;A0A087WPK3;Q3UZ39-2;A0A087WSF5;G5E8E1;Q3UZ39	276;231;266;231;193;93;83	A0A087WNU6;Q3UZ39	A0A087WNU6	Leucine-rich repeat flightless-interacting protein 1	Lrrfip1		0.328095	0	3.45318e-09	55.589	39.211	55.589																									0.328095	0	3.45318e-09	55.589
A0A087WNU6;E9Q9T1;A0A087WPK3;Q3UZ39-2;A0A087WSF5;G5E8E1;Q3UZ39	277;232;267;232;194;94;84	A0A087WNU6;Q3UZ39	A0A087WNU6	Leucine-rich repeat flightless-interacting protein 1	Lrrfip1		0.328095	0	3.45318e-09	55.589	39.211	55.589																									0.328095	0	3.45318e-09	55.589
A0A087WNU9;A0A087WPP8;Q6AXH6;Q6AXD2;P62484	80;221;227;227;221	A0A087WNU9	A0A087WNU9	Abl interactor 2	Abi2		0.953199	13.0893	0.00300867	49.536	23.152	49.536	0.953199	13.0893	0.00300867	49.536	0	0		NaN	0	0		NaN	0	0		NaN	0	0		NaN	0	0		NaN					0	0		NaN	0	0		NaN	0
A0A087WNV1;A0A087WSR7;A0A087WR52;Q8K2K6-3;Q8K2K6-1;Q8K2K6	322;322;383;362;362;362	A0A087WNV1	A0A087WNV1	Arf-GAP domain and FG repeat-containing protein 1	Agfg1		0.987448	20.8933	5.00502e-18	84.762	69.607	84.762	0.970539	16.4079	8.14838e-10	71.535					0.987448	20.8933	5.00502e-18	84.762					0.94036	15.7016	2.83754e-08	62.684					0.818806	7.59564	2.82504e-08	63.184	0.739234	7.20165	1.75392e-07	53.779	0.918993	15.1151	1.21746e-07	55.127
A0A087WNV1;A0A087WSR7;A0A087WR52;Q8K2K6-3;Q8K2K6-1;Q8K2K6;A0A087WRL1;Q8K2K6-2	179;179;176;179;179;179;110;179	A0A087WNV1	A0A087WNV1	Arf-GAP domain and FG repeat-containing protein 1	Agfg1		0.60008	0.708745	9.56762e-31	84.515	57.127	54.324	0	0		NaN	0.54403	0.729253	4.84608e-08	55.413					0.55538	0.792957	4.61399e-12	62.683	0.562862	0.955937	9.56762e-31	84.515	0.60008	0.708745	7.44765e-08	54.324	0	0		NaN	0.540794	0.665255	5.62007e-06	48.422					0.588353
A0A087WNV1;A0A087WSR7;A0A087WR52;Q8K2K6-3;Q8K2K6-1;Q8K2K6;A0A087WRL1;Q8K2K6-2	181;181;178;181;181;181;112;181	A0A087WNV1	A0A087WNV1	Arf-GAP domain and FG repeat-containing protein 1	Agfg1		0.99789	26.7514	6.89065e-07	88.187	62.75	88.187	0.863336	8.00762	0.000489666	63.408	0	0		NaN	0.969151	15.0117	0.00206505	52.693	0.99789	26.7514	6.89065e-07	88.187	0.940171	12.0655	0.00593373	43.544	0.970328	15.1663	0.0018407	53.569	0	0		NaN	0.847725	7.47677	0.00423805	45.879	0.845218	7.39666	0.00450759	45.077	0.991789
A0A087WR91;A0A087WPY8;A0A087WQF8;A0A087WP48;A0A087WS04;A0A087WS29;A0A087WQG4;A0A087WQD0;A0A087WNW3;A0A087WQI3;A0A087WPW5;A0A087WS23;A0A087WQ25;A0A087WRS1;A0A087WQQ5;A0A087WP85;A0A087WP14;A0A087WPX0;F8VQC7;Q61595-2;Q61595-12;Q61595-16;Q61595-3;Q61595-14;Q61595-6;Q61595-4;Q61595-9;Q61595-8;Q61595-13;Q61595-5;Q61595-15;Q61595-10;Q61595-7;Q61595-11;Q61595	75;75;75;75;75;75;75;75;75;75;75;75;75;75;75;75;75;75;75;75;75;75;75;75;75;75;75;75;75;75;75;75;75;75;75	A0A087WR91	A0A087WR91	Kinectin	Ktn1		0.835147	7.75406	8.35363e-06	67.43	51.838	65.25	0.835147	7.75406	1.41671e-05	65.25	0.493477	0	0.000317241	58.49	0.457845	0	0.000760739	50.883					0.439348	0	0.00170388	48.229	0.827005	7.44019	1.64364e-05	56.529	0.443764	0	0.00632406	42.64									0
A0A087WNZ7;G5E870;A0A087WSG4;A0A087WP92;A0A0B4J1N9	310;310;19;352;310	A0A087WNZ7	A0A087WNZ7	E3 ubiquitin-protein ligase TRIP12	Trip12		0.617274	2.07616	4.54093e-05	62.709	49.03	46.663	0.582985	1.45507	9.90878e-05	58.98	0.568095	1.19042	0.000337399	50.653					0.499985	0	0.000785198	45.384	0.56865	1.20019	0.000187733	54.974	0.499999	0	0.000154279	56.215	0.617274	2.07616	0.000676503	46.663									0.499997
A0A087WNZ7;G5E870;A0A087WSG4;A0A087WP92;A0A0B4J1N9	312;312;21;354;312	A0A087WNZ7	A0A087WNZ7	E3 ubiquitin-protein ligase TRIP12	Trip12		0.989482	19.7348	1.29294e-05	83.617	60.391	79.633	0.989482	19.7348	4.71883e-05	79.633	0.949243	12.719	0.000194822	65.295	0.984591	18.0548	1.29294e-05	83.617	0.88033	8.6666	6.32852e-05	71.558	0.858939	7.84555	6.84712e-05	72.496	0.975902	16.0743	7.5504e-05	77.185	0.955934	13.3634	0.000209246	64.827	0.791593	5.7963	0.000193371	54.764	0.979233	16.7356	0.000214681	64.65	0.860556
A0A087WNZ7;G5E870	1016;1049	A0A087WNZ7	A0A087WNZ7	E3 ubiquitin-protein ligase TRIP12	Trip12		0.941792	12.0897	0.00109814	40.179	29.392	40.179					0	0		NaN	0	0		NaN					0	0		NaN									0	0		NaN					0.941792
Q3UTM5;A0A087WSJ9;A0A087WSH2;A0A087WPW1;F6WDS8;A0A087WQG6;A0A087WNZ9;A0A087WRP8;A0A087WPC4;A0A087WPD1;Q9Z2H2	242;242;207;242;242;242;242;242;242;242;242	Q3UTM5	Q3UTM5	Regulator of G-protein signaling 6	Rgs6		0.278432	0	2.57198e-05	40.81	33.364	40.81									0.278432	0	2.57198e-05	40.81																									0
Q3UTM5;A0A087WSJ9;A0A087WSH2;A0A087WPW1;F6WDS8;A0A087WQG6;A0A087WNZ9;A0A087WRP8;A0A087WPC4;A0A087WPD1;Q9Z2H2	244;244;209;244;244;244;244;244;244;244;244	Q3UTM5	Q3UTM5	Regulator of G-protein signaling 6	Rgs6		0.278432	0	2.57198e-05	40.81	33.364	40.81									0.278432	0	2.57198e-05	40.81																									0
J3QP81;A0A087WS18;A0A087WQ95;A0A087WP42;A0A087WRE8;A0A0A6YXZ1;E9Q6L0;A0A087WNW8;A0A087WRK0;E9QNY9;E9QKH0;A0A087WQ31;A0A087WQF1;Q80TV8-2;Q80TV8;A0A0N4SUT7	734;734;743;743;800;519;734;750;751;800;779;787;750;799;778;131	J3QP81	J3QP81	CLIP-associating protein 1	Clasp1		1	59.0674	0.00807897	61.161	37.131	59.067	1	40.4964	0.0396719	40.496	1	59.0674	0.00922223	59.067	0	0		NaN	0	0		NaN	0	0		NaN	0	0		NaN	1	44.3175	0.0257596	44.318	1	42.3359	0.0329747	42.336	0	0		NaN
J3QP81;A0A087WS18;A0A087WQ95;A0A087WP42;A0A087WRE8;A0A0A6YXZ1;E9Q6L0;A0A087WNW8;A0A087WRK0;E9QNY9;E9QKH0;A0A087WQ31;A0A087WQF1;Q80TV8-2;Q80TV8;A0A0N4SVH2	280;280;280;280;280;48;280;280;280;280;280;280;280;280;280;66	J3QP81	J3QP81	CLIP-associating protein 1	Clasp1		0.690654	6.52577	0.0021241	63.073	47.226	63.073	0.616494	5.13951	0.00318693	53.327	0.605508	4.95882	0.00292553	54.259	0	0		NaN	0	0		NaN	0.581656	4.59644	0.0278594	50.194	0.601914	5.08564	0.0118126	42.802	0	0		NaN	0.315749	0	0.0111171	43.282	0	0		NaN	0
J3QP81;A0A087WS18;A0A087WQ95;A0A087WP42;A0A087WRE8;A0A0A6YXZ1;E9Q6L0;A0A087WNW8;A0A087WRK0;E9QNY9;E9QKH0;A0A087WQ31;A0A087WQF1;Q80TV8-2;Q80TV8;A0A0N4SVH2	281;281;281;281;281;49;281;281;281;281;281;281;281;281;281;67	J3QP81	J3QP81	CLIP-associating protein 1	Clasp1		0.315749	0	0.0111171	43.282	26.506	43.282									0	0		NaN	0	0		NaN									0	0		NaN	0.315749	0	0.0111171	43.282	0	0		NaN	0
J3QP81;A0A087WS18;A0A087WQ95;A0A087WP42;A0A087WRE8;A0A0A6YXZ1;E9Q6L0;A0A087WNW8;A0A087WRK0;E9QNY9;E9QKH0;A0A087WQ31;A0A087WQF1;Q80TV8-2;Q80TV8;A0A0N4SVH2	282;282;282;282;282;50;282;282;282;282;282;282;282;282;282;68	J3QP81	J3QP81	CLIP-associating protein 1	Clasp1		0.652677	5.72485	0.00311916	53.569	40.191	53.569									0	0		NaN	0	0		NaN									0	0		NaN	0.315749	0	0.0111171	43.282	0	0		NaN	0.652677
J3QP81;A0A087WS18;A0A087WQ95;A0A087WP42;A0A087WRE8;A0A0A6YXZ1;E9Q6L0;A0A087WNW8;A0A087WRK0;E9QNY9;E9QKH0;A0A087WQ31;A0A087WQF1;Q80TV8-2;Q80TV8;A0A0A6YWK1	1051;1052;1061;1084;1118;836;1044;1067;1069;1118;1089;1105;1060;1117;1088;176	J3QP81	J3QP81	CLIP-associating protein 1	Clasp1		0.982407	18.9501	3.65398e-40	118.47	96.238	106.6	0.982407	18.9501	1.65235e-27	106.6	0.819254	8.38345	0.000126251	62.378	0.817277	6.72657	1.24776e-39	115.8	0.878939	9.8026	1.43174e-26	102.38	0.873502	8.70836	1.57416e-05	72.417	0.810809	6.56003	2.14353e-05	71.08	0.864702	8.65457	1.88304e-05	71.692	0.856582	8.36635	1.17612e-11	88.187	0.836529	7.25502	3.77614e-08	80.69	0.794159
J3QP81;A0A087WS18;A0A087WQ95;A0A087WP42;A0A087WRE8;A0A0A6YXZ1;E9Q6L0;A0A087WNW8;A0A087WRK0;E9QNY9;E9QKH0;A0A087WQ31;A0A087WQF1;A0A0N4SUT7	646;646;646;646;646;422;646;662;654;646;646;654;662;13	J3QP81	J3QP81		Clasp1		0.964623	15.9637	2.33844e-15	88.441	71.415	59.261	0.641163	6.42233	2.33844e-15	88.441	0.779416	10.4082	9.72739e-05	49.627	0.282833	0	1.26912e-06	73.624	0.444155	5.28991	1.18661e-05	51.029	0.199967	0	9.89347e-06	52.344	0.964623	15.9637	1.7369e-05	59.261	0.199987	0	4.90873e-05	51.774	0.19994	0	3.08892e-06	55.864	0.199997	0	3.15805e-05	63.537	0.246035
J3QP81;A0A087WS18;A0A087WQ95;A0A087WP42;A0A087WRE8;A0A0A6YXZ1;E9Q6L0;A0A087WNW8;A0A087WRK0;E9QNY9;E9QKH0;A0A087WQ31;A0A087WQF1;A0A0N4SUT7	647;647;647;647;647;423;647;663;655;647;647;655;663;14	J3QP81	J3QP81		Clasp1		0.403113	2.14363	2.33844e-15	88.441	71.415	62.042	0.3196	0	2.33844e-15	88.441	0.199851	0	0.000123286	41.052	0.199872	0	0.000116649	45.257	0.403113	2.14363	1.18661e-05	62.042	0.261704	0	9.89347e-06	63.537	0.315491	0	1.7369e-05	51.774	0.274058	0	4.90873e-05	51.774	0.347533	0	1.26912e-06	73.624	0.199997	0	3.15805e-05	63.537	0.246035
J3QP81;A0A087WS18;A0A087WQ95;A0A087WP42;A0A087WRE8;A0A0A6YXZ1;E9Q6L0;A0A087WNW8;A0A087WRK0;E9QNY9;E9QKH0;A0A087WQ31;A0A087WQF1;A0A0N4SUT7	649;649;649;649;649;425;649;665;657;649;649;657;665;16	J3QP81	J3QP81		Clasp1		0.423854	0	2.33844e-15	88.441	71.415	51.029	0.3196	0	2.33844e-15	88.441	0.199851	0	0.000123286	41.052	0.199872	0	0.000116649	45.257	0.423854	0	1.18661e-05	51.029	0.261704	0	9.89347e-06	63.537	0.315491	0	1.7369e-05	51.774	0.274058	0	4.90873e-05	51.774	0.347533	0	1.26912e-06	73.624	0.199997	0	3.15805e-05	63.537	0.246035
J3QP81;A0A087WS18;A0A087WQ95;A0A087WP42;A0A087WRE8;A0A0A6YXZ1;E9Q6L0;A0A087WNW8;A0A087WRK0;E9QNY9;E9QKH0;A0A087WQ31;A0A087WQF1;Q80TV8-2;Q80TV8	598;598;598;598;598;366;598;598;598;598;598;598;598;598;598	J3QP81	J3QP81	CLIP-associating protein 1	Clasp1		0.85359	7.6568	2.4678e-07	82.449	61.511	82.449	0.499999	0	0.000127832	60.528	0.5	0	4.60763e-06	75.97	0.499997	0	0.000148053	59.252	0.85359	7.6568	2.4678e-07	82.449	0.499999	0	0.000168916	57.936	0	0		NaN	0.499991	0	0.00118663	45.33	0.5	0	6.23628e-05	65.374	0.499999	0	0.000307926	54.103	0.597785
J3QP81;A0A087WS18;A0A087WQ95;A0A087WP42;A0A087WRE8;A0A0A6YXZ1;E9Q6L0;A0A087WNW8;A0A087WRK0;E9QNY9;E9QKH0;A0A087WQ31;A0A087WQF1;Q80TV8-2;Q80TV8	600;600;600;600;600;368;600;600;600;600;600;600;600;600;600	J3QP81	J3QP81	CLIP-associating protein 1	Clasp1		0.962335	15.0312	4.60763e-06	75.97	50.323	48.44	0.499999	0	0.000127832	60.528	0.5	0	4.60763e-06	75.97	0.499997	0	0.000148053	59.252					0.499999	0	0.000168916	57.936	0	0		NaN	0.962335	15.0312	0.00118663	48.44	0.5	0	6.23628e-05	65.374	0.499999	0	0.000307926	54.103
J3QP81;A0A087WS18;A0A087WQ95;A0A087WP42;A0A087WRE8;A0A0A6YXZ1;E9Q6L0;A0A087WNW8;A0A087WRK0;E9QNY9;E9QKH0;A0A087WQ31;A0A087WQF1;Q80TV8-2;Q80TV8	555;555;555;555;555;323;555;555;555;555;555;555;555;555;555	J3QP81	J3QP81	CLIP-associating protein 1	Clasp1		0.240477	0	0.00324675	46.318	31.174	46.318																	0	0		NaN	0	0		NaN					0	0		NaN	0	0		NaN	0.240477
J3QP81;A0A087WS18;A0A087WQ95;A0A087WP42;A0A087WRE8;A0A0A6YXZ1;E9Q6L0;A0A087WNW8;A0A087WRK0;E9QNY9;E9QKH0;A0A087WQ31;A0A087WQF1;Q80TV8-2;Q80TV8	556;556;556;556;556;324;556;556;556;556;556;556;556;556;556	J3QP81	J3QP81	CLIP-associating protein 1	Clasp1		0.240477	0	0.00324675	46.318	31.174	46.318																	0	0		NaN	0	0		NaN					0	0		NaN	0	0		NaN	0.240477
J3QP81;A0A087WS18;A0A087WQ95;A0A087WP42;A0A087WRE8;A0A0A6YXZ1;E9Q6L0;A0A087WNW8;A0A087WRK0;E9QNY9;E9QKH0;A0A087WQ31;A0A087WQF1;Q80TV8-2;Q80TV8	557;557;557;557;557;325;557;557;557;557;557;557;557;557;557	J3QP81	J3QP81	CLIP-associating protein 1	Clasp1		0.240477	0	0.00324675	46.318	31.174	46.318																	0	0		NaN	0	0		NaN					0	0		NaN	0	0		NaN	0.240477
J3QP81;A0A087WS18;A0A087WQ95;A0A087WP42;A0A087WRE8;A0A0A6YXZ1;E9Q6L0;A0A087WNW8;A0A087WRK0;E9QNY9;E9QKH0;A0A087WQ31;A0A087WQF1;Q80TV8-2;Q80TV8	559;559;559;559;559;327;559;559;559;559;559;559;559;559;559	J3QP81	J3QP81	CLIP-associating protein 1	Clasp1		0.808116	8.24898	0.000348336	61.097	44.465	55.213									0.808116	8.24898	0.0010645	55.213	0.791812	8.27387	0.000348336	61.097	0	0		NaN	0	0		NaN					0	0		NaN	0	0		NaN
J3QP81;A0A087WS18;A0A087WQ95;A0A087WP42;A0A087WRE8;A0A0A6YXZ1;A0A087WNW8;A0A087WRK0;A0A087WQ31;Q80TV8-2;A0A0N4SUT7	748;748;757;757;814;533;764;765;801;813;145	J3QP81	J3QP81	CLIP-associating protein 1	Clasp1		0.25	0	6.12004e-31	89.668	81.278	67.358	0.25	0	4.73961e-19	81.356	0.25	0	8.25316e-15	72.086	0.25	0	1.32543e-10	57.496					0.25	0	1.21312e-05	45.696	0	0		NaN					0.25	0	7.09976e-15	72.644	0	0		NaN	0.25
J3QP81;A0A087WS18;A0A087WQ95;A0A087WP42;A0A087WRE8;A0A0A6YXZ1;A0A087WNW8;A0A087WRK0;A0A087WQ31;Q80TV8-2;A0A0N4SUT7	750;750;759;759;816;535;766;767;803;815;147	J3QP81	J3QP81	CLIP-associating protein 1	Clasp1		0.25	0	6.12004e-31	89.668	81.278	67.358	0.25	0	4.73961e-19	81.356	0.25	0	8.25316e-15	72.086	0.25	0	1.32543e-10	57.496					0.25	0	1.21312e-05	45.696	0	0		NaN					0.25	0	7.09976e-15	72.644	0	0		NaN	0.25
J3QP81;A0A087WS18;A0A087WQ95;A0A087WP42;A0A087WRE8;E9Q6L0;E9QNY9;E9QKH0;Q80TV8-2;Q80TV8	633;633;633;633;633;633;633;633;633;633	J3QP81	J3QP81	CLIP-associating protein 1	Clasp1		0.482557	0	5.09419e-07	47.757	41.299	47.757	0.475295	0	1.68185e-05	42.59					0	0		NaN	0	0		NaN									0	0		NaN									0.482557
J3QP81;A0A087WS18;A0A087WQ95;A0A087WP42;A0A087WRE8;E9Q6L0;E9QNY9;E9QKH0;Q80TV8-2;Q80TV8	636;636;636;636;636;636;636;636;636;636	J3QP81	J3QP81	CLIP-associating protein 1	Clasp1		0.482557	0	5.09419e-07	47.757	41.299	47.757	0.475295	0	1.68185e-05	42.59					0	0		NaN	0	0		NaN									0	0		NaN									0.482557
F6T2X5;A0A087WP46	726;1088	F6T2X5	F6T2X5		BC034090		1	94.7861	2.76318e-22	105.14	89.51	105.14	0	0		NaN	0	0		NaN	1	94.7861	2.76318e-22	105.14	0.99994	42.2213	0.0206929	50.108	0.999999	62.8278	3.81169e-05	69.716	1	72.7338	3.80185e-07	83.087	0	0		NaN	1	69.6397	5.80455e-06	77.527	0	0		NaN	1
A0A087WQH5;A0A087WP54;A0A087WRT5;Q6NS59-2;Q6NS59	537;494;511;282;707	A0A087WQH5	A0A087WQH5	Protein FAM135A	Fam135a		1	45.368	0.00982696	57.96	39.229	45.368	1	45.368	0.0227075	45.368	0	0		NaN	0	0		NaN	0	0		NaN	0	0		NaN	0	0		NaN	0	0		NaN	1	57.9598	0.00982696	57.96	0	0		NaN	0
A0A087WQY9;A0A087WPC5;A0A087WS92;A0A087WP83;Q8VDJ3	31;31;31;31;31	A0A087WQY9	A0A087WQY9	Vigilin	Hdlbp		0.999926	41.3306	4.15777e-133	178.14	161.76	114.54	0.99563	23.577	1.12873e-26	103.39	0.992561	21.7231	0.000123345	60.598	0.999493	32.9496	4.25687e-41	119.45	0.890307	9.11354	0.000178224	53.967	0.996693	24.792	2.17402e-27	106.42	0.985743	18.3973	2.13897e-35	109.84	0.999854	38.3593	1.77837e-45	122.33	0.999926	41.3306	1.66515e-39	114.54	0.959155	13.7075	8.20415e-27	104.41	0.999863
A0A087WSU8;A0A087WPA4;A0A0R4J2B5;A0A087WRI8;G5E8E3;Q8R3Y5-3;Q8R3Y5-2;Q8R3Y5	33;110;130;136;136;130;130;136	A0A087WSU8	A0A087WSU8	Uncharacterized protein C19orf47 homolog	2310022A10Rik		0.496519	0	0.000130045	43.534	29.702	43.534																									0	0		NaN					0.496519	0	0.000130045	43.534
A0A087WSU8;A0A087WPA4;A0A0R4J2B5;A0A087WRI8;G5E8E3;Q8R3Y5-3;Q8R3Y5-2;Q8R3Y5	38;115;135;141;141;135;135;141	A0A087WSU8	A0A087WSU8	Uncharacterized protein C19orf47 homolog	2310022A10Rik		0.982229	19.9826	1.182e-19	91.725	84.997	91.725	0.686174	3.94617	2.81201e-05	49.973									0.959644	14.5903	6.62899e-07	72.086	0.846713	8.69774	1.98513e-05	50.87	0.786405	5.86262	0.000130045	43.534	0.947614	14.367	7.85034e-06	65.25	0.850493	7.75406	7.85034e-06	65.25	0.496519	0	0.000130045	43.534	0.982229
A0A087WPF7-3;E9PZ86;A0A2C9F2I4;A0A087WPF7	469;484;693;941	A0A087WPF7-3	A0A087WPF7-3		Auts2		0.999818	37.3946	0.0409793	51.066	41.317	51.066					0.999818	37.3946	0.0409793	51.066	0	0		NaN	0	0		NaN																					0.969726
A0A087WPT7;Q6P549	132;132	A0A087WPT7	A0A087WPT7	Phosphatidylinositol 3,4,5-trisphosphate 5-phosphatase 2	Inppl1		1	42.7114	8.1185e-131	179.41	160.34	42.711	1	50.6082	2.44836e-74	154.6	1	40.962	1.42757e-64	146.47	1	43.4542	2.52493e-100	169.19	1	41.9124	8.1185e-131	179.41	1	52.5225	3.77163e-99	167.88	1	42.7114	1.42757e-64	146.47	1	43.4542	1.83407e-64	145.29	1	48.2163	8.1185e-131	179.41	1	44.045	5.43287e-57	141	1
A0A087WPT7;Q6P549	240;240	A0A087WPT7	A0A087WPT7	Phosphatidylinositol 3,4,5-trisphosphate 5-phosphatase 2	Inppl1		0.490285	0	0.000164873	66.267	53.066	66.267	0	0		NaN	0.490285	0	0.000164873	66.267													0	0		NaN
A0A087WPT7;Q6P549	241;241	A0A087WPT7	A0A087WPT7	Phosphatidylinositol 3,4,5-trisphosphate 5-phosphatase 2	Inppl1		0.870773	8.48987	0.000164873	66.267	53.066	45.915	0	0		NaN	0.490285	0	0.000164873	66.267													0	0		NaN
A0A087WQ48;H7BWZ9;Q8BL99-5;Q8BL99-6;Q8BL99	1261;1263;1253;1261;1261	A0A087WQ48	A0A087WQ48	Protein dopey-1	Dopey1		0.965596	15.2098	1.52727e-06	89.805	49.888	62.408					0.948073	14.0939	0.0278545	44.299	0.961558	14.8429	1.52727e-06	89.805	0.965596	15.2098	0.0011226	62.408													0.95786	13.7769	0.000472248	69.864					0.958494
A0A087WQ61;A0A087WQU0;Q8C134;Q9ERD6-2;Q9ERD6-3;Q9ERD6-4;Q9ERD6	308;308;308;273;308;308;308	A0A087WQ61	A0A087WQ61	Ras-specific guanine nucleotide-releasing factor RalGPS2	Ralgps2		1	50.305	0.000272929	50.305	31.23	50.305													1	50.305	0.000272929	50.305													0	0		NaN					0
A0A087WQ61;A0A087WQU0;Q8C134;Q9ERD6-2;Q9ERD6-3;Q9ERD6-4;Q9ERD6	293;293;293;258;293;293;293	A0A087WQ61	A0A087WQ61	Ras-specific guanine nucleotide-releasing factor RalGPS2	Ralgps2		0.546732	0.814464	7.29443e-07	51.473	31.92	47.392	0.499976	0	2.38614e-05	43.12													0.49999	0	7.29443e-07	51.473													0.499983	0	2.1381e-05	45.269
A0A087WQ61;A0A087WQU0;Q8C134;Q9ERD6-2;Q9ERD6-3;Q9ERD6-4;Q9ERD6	296;296;296;261;296;296;296	A0A087WQ61	A0A087WQ61	Ras-specific guanine nucleotide-releasing factor RalGPS2	Ralgps2		0.82472	6.72593	2.90824e-07	55.063	44.866	55.063	0.499976	0	2.38614e-05	43.12									0.526631	0.463341	1.58669e-05	46.862	0.49999	0	7.29443e-07	51.473	0.82472	6.72593	2.90824e-07	55.063									0.499983	0	2.1381e-05	45.269
A0A087WQ61;A0A087WQU0;Q8C134;Q9ERD6-2;Q9ERD6-3;Q9ERD6-4;Q9ERD6	336;336;336;301;336;336;336	A0A087WQ61	A0A087WQ61	Ras-specific guanine nucleotide-releasing factor RalGPS2	Ralgps2		0.922231	10.7461	7.22179e-06	46.296	37.2	46.296																	0.922231	10.7461	7.22179e-06	46.296
A0A087WQA0;F8WI22;Q8K019-3;Q8K019-2;Q8K019;A0A087WRN1	383;383;381;381;383;96	A0A087WQA0	A0A087WQA0	Bcl-2-associated transcription factor 1	Bclaf1		1	79.8651	2.33227e-80	147.92	141.88	142.01	0.999998	56.8644	1.71006e-57	123.36	0.999988	49.1385	1.10288e-25	94.449	1	76.1704	1.39236e-61	129.62	0.999987	48.9961	1.02838e-65	133.71	0.99989	39.597	4.28104e-66	136.34	0.999998	56.8644	1.71006e-57	123.36	1	79.8651	2.7928e-72	142.01	1	66.7945	3.90799e-57	120.24	0.999999	59.1772	2.59841e-57	122.1	1
A0A087WQA0;F8WI22;Q8K019-3;Q8K019-2;Q8K019;A0A087WRN1	387;387;385;385;387;100	A0A087WQA0	A0A087WQA0	Bcl-2-associated transcription factor 1	Bclaf1		0.594197	1.65863	8.83237e-08	56.72	52.452	56.72																																	0	0		NaN	0.460435
A0A087WQA0;F8WI22;Q8K019-3;Q8K019-2;Q8K019;A0A087WRN1	510;510;508;508;510;223	A0A087WQA0	A0A087WQA0	Bcl-2-associated transcription factor 1	Bclaf1		0.999993	51.7363	7.68926e-19	130.1	105.81	77.078	0.999993	51.7363	5.39851e-08	90.614	0.999965	44.5182	5.07496e-11	99.5	0.999944	42.4978	5.63052e-11	100.93	0.999963	44.3085	2.36529e-14	113.61	0.999773	36.4323	1.8878e-11	106.01	0.999877	39.11	3.10612e-06	86.911	0.999909	40.3973	1.40055e-11	106.67	0.999433	32.4627	7.68926e-19	130.1	0.999902	40.1041	5.39851e-08	90.614	0.999932
A0A087WQA0;F8WI22;Q8K019-3;Q8K019-2;Q8K019;A0A087WRN1	656;656;654;654;656;369	A0A087WQA0	A0A087WQA0	Bcl-2-associated transcription factor 1	Bclaf1		0.998182	27.3955	0.00028674	64.224	44.954	62.088	0.996142	24.1196	0.00205933	57.348	0.958096	13.5916	0.00120069	48.284	0.986856	18.7554	0.000626253	53.448	0.997161	25.4558	0.000307623	64.224	0.951446	12.9216	0.00028674	57.785	0.998182	27.3955	0.000315003	62.088	0.970759	15.2112	0.00118032	48.44	0.971321	15.298	0.000302349	60.161	0.978513	16.5838	0.000812193	51.276	0.971135
A0A087WQA0;F8WI22;Q8K019-3;Q8K019-2;Q8K019	216;216;214;214;216	A0A087WQA0	A0A087WQA0	Bcl-2-associated transcription factor 1	Bclaf1		0.353429	0	7.84661e-07	51.841	31.001	51.841													0	0		NaN																	0.353429	0	7.84661e-07	51.841
A0A087WQA0;F8WI22;Q8K019-3;Q8K019-2;Q8K019	221;221;219;219;221	A0A087WQA0	A0A087WQA0	Bcl-2-associated transcription factor 1	Bclaf1		0.353429	0	7.84661e-07	51.841	31.001	51.841													0	0		NaN																	0.353429	0	7.84661e-07	51.841
A0A087WQA0;F8WI22;Q8K019-3;Q8K019-2;Q8K019	284;284;282;282;284	A0A087WQA0	A0A087WQA0	Bcl-2-associated transcription factor 1	Bclaf1		0.879414	9.22401	7.09785e-05	69.729	55.038	48.112	0.704905	3.87553	0.000494597	50.957	0.875333	8.42799	0.000404519	56.54	0.785234	5.62604	0.00071022	57.159	0.86329	8.3662	9.8736e-05	68.944	0.879414	9.22401	0.000656507	49.5	0.538545	0.75952	8.21372e-05	49.5	0.735643	6.16345	0.000593745	52.784	0.536571	0.515643	0.00219221	40.025	0.806029	6.07417	0.0012327	46.159	0.814288
A0A087WQA0;F8WI22;Q8K019-3;Q8K019-2;Q8K019	286;286;284;284;286	A0A087WQA0	A0A087WQA0	Bcl-2-associated transcription factor 1	Bclaf1		0.570049	1.48091	2.41544e-08	63.709	47.819	49.049					0.50212	0	0.000782422	48.004	0.522791	0	2.41544e-08	57.159	0	0		NaN	0.553423	1.06447	0.000656507	49.5	0.502227	0	0.000656507	49.5	0.502175	0	0.000145831	43.921	0.544137	0	0.000205597	63.709	0.490565	0	0.000485496	40.515	0.499104
A0A087WQA0;F8WI22;Q8K019-3;Q8K019-2;Q8K019	289;289;287;287;289	A0A087WQA0	A0A087WQA0	Bcl-2-associated transcription factor 1	Bclaf1		0.955087	13.2587	2.41544e-08	72.417	57.727	50.883	0.910022	10.5257	0.000701964	50.957	0.876187	8.42799	0.000404519	56.54	0.955087	13.2587	2.41544e-08	54.288	0.87178	8.3662	8.62499e-05	68.944	0.502228	0	0.000656507	49.5	0.502228	0	0.000656507	49.5	0.858575	8.70836	0.000145831	72.417	0.85677	7.47473	0.000205597	63.709	0.833172	6.92185	0.000485496	46.159	0.947977
A0A087WQA0;F8WI22;Q8K019-3;Q8K019-2;Q8K019;A0A087WRN1	523;523;521;521;523;236	A0A087WQA0	A0A087WQA0	Bcl-2-associated transcription factor 1	Bclaf1		0.536848	0.641271	0.00108352	54.608	37.582	54.608									0	0		NaN	0	0		NaN													0	0		NaN	0.536848	0.641271	0.00108352	54.608
A0A087WQA0;F8WI22;Q8K019-3;Q8K019-2;Q8K019;A0A087WRN1	529;529;527;527;529;242	A0A087WQA0	A0A087WQA0	Bcl-2-associated transcription factor 1	Bclaf1		0.999672	34.8383	0.00113023	54.343	35.612	51.092	0.988201	19.23	0.00359629	44.616	0.999504	33.0418	0.00113023	54.343	0	0		NaN	0.987326	18.9156	0.00128777	53.448	0.999672	34.8383	0.0200603	51.092	0.998089	27.1799	0.00359629	44.616	0.98492	18.15	0.06126	42.001	0	0		NaN	0	0		NaN	0.995297
A0A087WQA0;F8WI22;Q8K019-3;Q8K019-2;Q8K019	183;183;181;181;183	A0A087WQA0	A0A087WQA0	Bcl-2-associated transcription factor 1	Bclaf1		0.818585	7.86212	2.66054e-05	43.31	33.375	43.31	0.818585	7.86212	2.66054e-05	43.31	0	0		NaN	0	0		NaN	0	0		NaN	0	0		NaN	0	0		NaN	0	0		NaN	0	0		NaN					0
A0A087WS74;A0A087WRP4;H3BJV1;A0A087WSH7;A0A087WQA5;A0A087WRZ5;Q8R0B4;Q8BLD4;Q6VYI5;Q6VYI4;Q921F2	6;31;32;60;96;180;180;180;180;180;180	A0A087WS74	A0A087WS74	TAR DNA-binding protein 43	Tardbp		0.5	0	0.000878826	49.595	27.44	49.595	0	0		NaN	0	0		NaN					0	0		NaN	0	0		NaN	0	0		NaN	0	0		NaN	0	0		NaN	0	0		NaN	0.5
A0A087WS74;A0A087WRP4;H3BJV1;A0A087WSH7;A0A087WQA5;A0A087WRZ5;Q8R0B4;Q8BLD4;Q6VYI5;Q6VYI4;Q921F2	9;34;35;63;99;183;183;183;183;183;183	A0A087WS74	A0A087WS74	TAR DNA-binding protein 43	Tardbp		0.938359	11.825	0.000878826	49.595	11.567	49.595	0	0		NaN	0	0		NaN	0.938359	11.825	0.000878826	49.595	0	0		NaN	0	0		NaN	0	0		NaN	0	0		NaN	0	0		NaN	0	0		NaN	0.5
A0A087WQB3;A0A087WR75;Q7TT18	112;715;707	A0A087WQB3	A0A087WQB3	Activating transcription factor 7-interacting protein 1	Atf7ip		0.732744	5.66646	4.4309e-10	51.963	43.113	51.963	0	0		NaN					0	0		NaN	0	0		NaN					0	0		NaN	0.732744	5.66646	4.4309e-10	51.963	0	0		NaN	0	0		NaN
A0A087WQS0;A0A1D5RM59;E9Q0S6;A0A087WRU0;A0A087WQ94;A0A087WQM0	1054;1054;1054;885;885;1010	A0A087WQS0	A0A087WQS0		Tns1		0.99998	46.9187	5.19753e-63	115.73	101.31	115.73	0.999907	40.3357	7.94661e-25	90.694	0.961239	14.0176	5.60987e-07	72.937	0.996212	24.2652	3.36346e-25	94.882	0.99998	46.9187	5.19753e-63	115.73	0.999528	33.272	1.74243e-13	80.738	0.998436	28.0575	6.96072e-10	78.234	0.999231	31.8801	1.09489e-07	61.963	0.999975	46.0815	1.37042e-18	87.339	0.999974	45.8752	3.72034e-33	104.2	0.998169
A0A087WQS0;A0A1D5RM59;E9Q0S6;A0A087WRU0;A0A087WQ94;A0A087WQM0	1062;1062;1062;893;893;1018	A0A087WQS0	A0A087WQS0		Tns1		0.999754	37.3622	5.87176e-33	96.708	87.221	89.721	0.990701	21.9078	3.58197e-14	85.554	0.951693	16.4049	1.50342e-05	53.252	0.994535	23.6738	3.4828e-14	85.636	0.999729	36.7701	2.13903e-13	80.293	0.983867	19.1219	3.50277e-14	85.619	0.996713	26.0855	1.65052e-09	77.597	0	0		NaN	0.999754	37.3622	9.86649e-25	89.721	0.997654	28.9258	8.24736e-10	70.837	0.998779
A0A087WQS0;A0A1D5RM59;E9Q0S6;A0A087WRU0;A0A087WQ94;A0A087WQM0	1067;1067;1067;898;898;1023	A0A087WQS0	A0A087WQS0		Tns1		0.529625	0	2.26676e-11	62.663	55.562	42.64	0	0		NaN	0	0		NaN	0	0		NaN	0	0		NaN	0	0		NaN	0	0		NaN	0	0		NaN	0.499483	0	2.26676e-11	62.663	0	0		NaN	0.529625
A0A087WQS0;A0A1D5RM59;E9Q0S6;A0A087WRU0;A0A087WQ94;A0A087WQM0	1070;1070;1070;901;901;1026	A0A087WQS0	A0A087WQS0		Tns1		0.937095	9.46203	2.26676e-11	62.663	55.562	62.663					0	0		NaN													0	0		NaN					0.937095	9.46203	2.26676e-11	62.663					0.890648
A0A087WQS0;A0A1D5RM59;E9Q0S6;A0A087WRU0;A0A087WQ94;A0A087WQM0	867;867;867;698;698;823	A0A087WQS0	A0A087WQS0		Tns1		1	73.7719	1.11733e-144	123.52	118.04	110.79	1	73.7719	5.28461e-110	110.79	0.999997	58.0151	1.11733e-144	123.52	0.99993	44.547	7.58184e-72	91.976	0.991298	17.9659	1.93096e-10	48.07	0.999501	30.676	3.62286e-40	74.561	0.999651	37.587	1.20286e-50	80.048					0.999998	60.9598	7.76626e-110	109.59	0.999903	43.1597	2.07533e-50	78.418	0.999998
A0A087WQS0;A0A1D5RM59;E9Q0S6;A0A087WRU0;A0A087WQ94;A0A087WQM0	874;874;874;705;705;830	A0A087WQS0	A0A087WQS0		Tns1		0.56054	1.05725	1.43604e-21	59.993	54.507	55.691	0.538093	0.610856	2.30624e-10	47.457	0.552256	0.846622	5.1384e-15	52.341	0.56054	1.05725	1.76209e-15	55.691	0.550907	0.819723	1.93096e-10	48.07	0.548598	0.846622	5.1384e-15	52.341	0.553469	0.910343	7.99069e-08	44.56					0.551981	0.901991	2.16677e-21	58.131	0.558932	0.995414	4.36039e-11	50.513	0.553734
A0A087WQS0;A0A1D5RM59;E9Q0S6;A0A087WRU0;A0A087WQ94;A0A087WQM0;Q9DBT6	1533;1546;1554;1372;1385;1489;290	A0A087WQS0	A0A087WQS0		Tns1		1	81.5779	1.55508e-18	109.44	87.697	109.44	0.999996	54.2202	4.26529e-07	88.087	0.999973	46.1207	3.13798e-05	71.558	0.999913	40.9515	9.04211e-05	65.295	1	81.5779	1.55508e-18	109.44	0.999966	44.9584	4.28392e-05	68.809	0.999898	40.2527	0.00010655	64.104	0.999982	47.6972	3.13638e-05	71.548	0.999979	47.3818	6.74873e-05	66.989	0.999995	53.6759	3.13484e-05	77.527	0.999996
A0A087WQS0;A0A1D5RM59;E9Q0S6;A0A087WRU0;A0A087WQ94;A0A087WQM0;Q9DBT6;A0A087WPC7	1342;1355;1363;1181;1194;1298;99;57	A0A087WQS0	A0A087WQS0		Tns1		0.990201	23.6135	3.31947e-72	140.46	120.35	66.325	0.990201	23.6135	7.5275e-25	96.544	0.964647	17.7242	6.79586e-14	85.845	0.988479	21.9176	3.31947e-72	140.46	0.970776	15.4025	2.20145e-62	131.48	0.988961	20.0307	3.58691e-61	125.86	0.96859	13.356	2.03284e-57	121.82	0.972067	13.3247	1.2416e-57	123.36	0.942241	11.2587	2.71026e-42	110.12	0.963289	16.8451	1.2416e-57	123.36	0.973867
A0A087WQS0;A0A1D5RM59;E9Q0S6;A0A087WRU0;A0A087WQ94;A0A087WQM0;Q9DBT6;A0A087WPC7	1344;1357;1365;1183;1196;1300;101;59	A0A087WQS0	A0A087WQS0		Tns1		0.734316	2.964	3.79443e-16	88.396	81.816	52.541	0.56746	0.914956	0.000790458	42.172	0	0		NaN	0.628145	2.4519	3.79443e-16	88.396	0	0		NaN	0.680631	2.26128	5.24893e-05	45.784	0.696281	1.5461	2.67027e-05	58.09	0	0		NaN	0.531699	0.928994	0.000248889	42.64	0	0		NaN	0
A0A087WQS0;A0A1D5RM59;E9Q0S6;A0A087WRU0;A0A087WQ94;A0A087WQM0;Q9DBT6;A0A087WPC7	1346;1359;1367;1185;1198;1302;103;61	A0A087WQS0	A0A087WQS0		Tns1		0.974878	15.4595	4.8334e-42	109.42	93.577	76.586	0.797009	5.83031	7.5275e-25	96.544	0.927098	10.7682	3.28526e-05	62.94	0.545496	0.508102	4.86167e-33	105.9	0.940542	11.8045	7.10178e-42	107.57	0.90355	9.46051	6.71899e-06	69.188	0	0		NaN	0.628277	2.08189	4.8334e-42	109.42	0.829486	6.55705	6.15911e-42	108.34	0.596981	1.41999	1.35268e-19	93.684	0.94026
A0A087WQS0;A0A1D5RM59;E9Q0S6;A0A087WRU0;A0A087WQ94;A0A087WQM0	545;545;545;376;376;501	A0A087WQS0	A0A087WQS0		Tns1		1	68.8723	5.98002e-98	137.68	99.047	137.68	0.999994	52.0619	4.00346e-10	88.507	0.999977	46.9096	7.20416e-19	95.651	1	68.8723	4.19597e-41	137.68	0.999994	53.0176	5.98002e-98	92.935	0.999999	60.3455	2.134e-28	113.35	0.999998	58.2917	4.55047e-26	109.84	0.999887	39.9886	3.8602e-10	88.73	0.99999	50.3287	4.06545e-11	94.09	0.999994	52.54	1.45861e-10	92.457	0.999997
A0A087WQS0;A0A1D5RM59;E9Q0S6;A0A087WRU0;A0A087WQ94;A0A087WQM0	549;549;549;380;380;505	A0A087WQS0	A0A087WQS0		Tns1		0.693057	6.42845	7.51781e-05	62.378	55.339	58.49	0.529201	1.28114	7.51781e-05	62.378					0.693057	6.42845	8.50348e-05	58.49	0.459887	0	0.000498013	43.791	0.459887	0	0.000498013	43.791	0	0		NaN	0	0		NaN	0.460455	0	0.000452066	44.294	0	0		NaN	0
A0A087WQS0;A0A1D5RM59;E9Q0S6;A0A087WRU0;A0A087WQ94;A0A087WQM0	572;572;572;403;403;528	A0A087WQS0	A0A087WQS0		Tns1		0.990657	22.8565	2.16195e-146	138.7	117.23	138.7	0.931761	13.6242	3.84844e-70	104.48	0.978854	19.1919	5.04799e-139	136.79	0.903072	12.3835	1.68057e-70	105.98	0.903897	11.0902	1.83047e-115	122.77	0.814668	9.21132	3.31524e-115	120.33	0.818772	9.04	3.3593e-48	90.323	0.975254	17.5026	2.94599e-99	116.39	0.951927	13.5273	2.22672e-57	94.807	0.792169	7.36904	2.92355e-58	97.437	0.990657
A0A087WQS0;A0A1D5RM59;E9Q0S6;A0A087WRU0;A0A087WQ94;A0A087WQM0	574;574;574;405;405;530	A0A087WQS0	A0A087WQS0		Tns1		0.551703	1.8514	2.52964e-115	121.62	105.69	94.807	0.410584	0.462565	4.75767e-58	95.244	0.487551	0.333226	1.22939e-20	66.447	0.53957	0.471337	1.32715e-40	87.21	0.478346	0	8.02114e-84	110.68	0.508262	0.511723	1.10614e-33	80.93	0.215154	0	3.46889e-08	50.099	0.417863	0	3.33182e-15	62.605	0.551703	1.8514	4.68555e-70	103.9					0.480608
A0A087WQS0;A0A1D5RM59;E9Q0S6;A0A087WRU0;A0A087WQ94;A0A087WQM0	575;575;575;406;406;531	A0A087WQS0	A0A087WQS0		Tns1		0.574798	5.31469	2.52964e-115	121.62	105.69	68.741	0.346252	0	4.75767e-58	95.244	0.219093	0	1.22939e-20	66.447	0.297723	0	1.32715e-40	87.21	0.478346	0	8.02114e-84	110.68					0.215154	0	3.46889e-08	50.099	0.417863	0	3.33182e-15	62.605	0.474408	0	4.68555e-70	103.9	0.574798	5.31469	1.75895e-20	68.741	0.455224
A0A087WQS0;A0A1D5RM59;E9Q0S6;A0A087WRU0;A0A087WQ94;A0A087WQM0	577;577;577;408;408;533	A0A087WQS0	A0A087WQS0		Tns1		0.333594	0.394758	2.92312e-133	131.81	126.52	70.268									0	0		NaN	0.296326	0	6.92386e-15	62.677					0.333594	0.394758	1.62614e-27	70.268									0.292517	1.56323	2.92312e-133	131.81	0
A0A087WQS0;A0A1D5RM59;E9Q0S6;A0A087WRU0;A0A087WQ94;A0A087WQM0	580;580;580;411;411;536	A0A087WQS0	A0A087WQS0		Tns1		0.329608	0	6.92386e-15	62.677	51.366	62.677									0	0		NaN	0.329608	0	6.92386e-15	62.677																					0
A0A087WQS0;A0A1D5RM59;E9Q0S6;A0A087WRU0;A0A087WQ94;A0A087WQM0	1115;1115;1115;946;946;1071	A0A087WQS0	A0A087WQS0		Tns1		0.894858	12.5533	1.09608e-33	99.11	87.721	99.11	0.472653	0	9.60623e-14	80.859	0.414319	0	2.94227e-13	77.899	0.47848	0	9.30771e-19	87.24	0.490189	0	2.35213e-13	78.78	0.441066	0	5.43184e-26	94.281	0.673145	6.26244	1.1003e-08	60.991	0.436974	0	1.33178e-06	50.938	0.485052	0	7.60554e-25	88.565	0.481088	0	4.93186e-10	71.073	0.894858
A0A087WQS0;A0A1D5RM59;E9Q0S6;A0A087WRU0;A0A087WQ94;A0A087WQM0	1117;1117;1117;948;948;1073	A0A087WQS0	A0A087WQS0		Tns1		0.543642	2.09544	1.02024e-81	133.86	124.33	123.36	0.466298	0	1.23888e-13	81.431	0.466609	0	4.33221e-41	102.58	0.473901	0	1.15134e-24	90.379	0.474195	0	4.33221e-41	102.58	0.424851	0	1.3279e-52	113.24	0.508541	0	6.88183e-07	55.031	0.480182	0	1.02024e-81	133.86	0.451928	0	1.71047e-51	111.79	0.457407	0	1.28556e-13	80.469	0.543642
A0A087WQS0;A0A1D5RM59;E9Q0S6;A0A087WRU0;A0A087WQ94;A0A087WQM0	1118;1118;1118;949;949;1074	A0A087WQS0	A0A087WQS0		Tns1		0.913986	11.5624	1.02024e-81	133.86	124.33	91.238	0.807002	6.56268	9.08732e-65	119.41	0.737556	5.81751	4.33221e-41	102.58	0.550133	1.67692	1.43327e-41	102.45	0.841677	7.31486	4.31255e-53	113.24	0.820549	6.65127	2.99991e-77	126.97	0.684584	4.38789	1.43327e-41	102.45	0.529321	0.790814	1.02024e-81	133.86	0.913986	11.5624	1.71047e-51	111.79	0.698619	5.83628	1.28556e-13	80.469	0.700938
A0A087WQS0;A0A1D5RM59;E9Q0S6;A0A087WRU0;A0A087WQ94;A0A087WQM0	535;535;535;366;366;491	A0A087WQS0	A0A087WQS0		Tns1		0.982102	17.5387	5.30761e-10	57.432	54.144	57.432									0	0		NaN	0.982102	17.5387	5.30761e-10	57.432	0	0		NaN	0	0		NaN					0	0		NaN
A0A087WQS0;A0A1D5RM59;E9Q0S6;A0A087WRU0;A0A087WQ94;A0A087WQM0	1010;1010;1010;841;841;966	A0A087WQS0	A0A087WQS0		Tns1		0.4	0	3.26764e-07	52.509	44.42	52.169	0	0		NaN	0.4	0	3.49259e-07	52.169					0.4	0	5.52558e-05	42.612					0	0		NaN	0	0		NaN	0.4	0	3.26764e-07	52.509	0	0		NaN
A0A087WQS0;A0A1D5RM59;E9Q0S6;A0A087WRU0;A0A087WQ94;A0A087WQM0	1013;1013;1013;844;844;969	A0A087WQS0	A0A087WQS0		Tns1		0.559898	1.22789	1.76761e-48	100.28	87.728	72.145	0.559898	1.22789	1.23218e-20	72.145	0.4	0	1.30574e-07	52.909	0.371444	0	2.79248e-07	51.175	0.490017	0	1.76761e-48	100.28	0.491497	0	2.91342e-38	91.319	0.524236	1.44004	8.48237e-39	93.73	0.476335	0	1.70149e-30	84.166	0.447704	0	6.8362e-25	79.783	0.435248	0	1.1389e-20	72.443	0.496594
A0A087WQS0;A0A1D5RM59;E9Q0S6;A0A087WRU0;A0A087WQ94;A0A087WQM0;Q9DBT6	1460;1473;1481;1299;1312;1416;217	A0A087WQS0	A0A087WQS0		Tns1		0.397635	0	0.00156615	49.418	44.806	42.095					0.360682	0	0.00175384	48.794					0.397635	0	0.00419397	42.095
A0A087WQS0;A0A1D5RM59;E9Q0S6;A0A087WRU0;A0A087WQ94;A0A087WQM0;Q9DBT6	1440;1453;1461;1279;1292;1396;197	A0A087WQS0	A0A087WQS0		Tns1		0.997864	26.7121	1.43735e-32	103.21	65.788	96.993	0.997864	26.7121	6.75856e-25	96.993	0.984185	17.9433	1.50927e-06	73.156	0.980543	17.0619	9.57975e-25	95.347	0.997686	26.3629	2.3324e-32	101.15	0.987636	19.0246	2.18941e-19	92.935	0.892162	9.18056	4.73729e-06	69.594	0.938159	11.814	2.1514e-14	87.932	0.973024	15.5758	4.92661e-09	77.746	0.988864	19.4844	1.43735e-32	103.21	0.972216
A0A087WQS0;A0A1D5RM59;E9Q0S6;A0A087WRU0;A0A087WQ94;A0A087WQM0;Q9DBT6	1442;1455;1463;1281;1294;1398;199	A0A087WQS0	A0A087WQS0		Tns1		0.556723	1.00846	4.96335e-05	47.639	35.493	42.123	0.499913	0	7.07596e-05	45.347	0.499925	0	5.47704e-05	47.082	0.499709	0	4.96335e-05	47.639					0.499797	0	0.000127839	43.592	0	0		NaN	0.499917	0	7.07596e-05	45.347					0.556723	1.00846	0.000798542	42.123	0.556698
A0A087WQS0;A0A1D5RM59;E9Q0S6;A0A087WRU0;A0A087WQ94;A0A087WQM0;Q9DBT6	1447;1460;1468;1286;1299;1403;204	A0A087WQS0	A0A087WQS0		Tns1		0.990398	20.1424	1.08888e-32	104.17	75.362	96.993	0.990398	20.1424	6.75856e-25	96.993	0.854575	8.21357	1.76849e-06	72.652	0.986231	18.6368	9.57975e-25	95.347	0.989605	19.8313	2.3324e-32	101.15	0.903315	9.8853	5.89712e-09	76.85	0.985295	18.4471	2.84408e-09	74.678	0.989165	19.6755	2.1514e-14	87.932	0.978985	17.4295	4.92661e-09	77.746	0.894153	9.30902	1.50616e-05	65.716	0.972214
A0A087WQS0;A0A1D5RM59;E9Q0S6;A0A087WRU0;A0A087WQ94;A0A087WQM0;Q9DBT6	1449;1462;1470;1288;1301;1405;206	A0A087WQS0	A0A087WQS0		Tns1		0.549319	0.860989	8.13051e-05	44.816	33.376	44.816					0	0		NaN	0	0		NaN					0	0		NaN	0	0		NaN	0	0		NaN					0	0		NaN	0
A0A087WQS0;A0A1D5RM59;E9Q0S6;A0A087WRU0;A0A087WQ94;A0A087WQM0;Q9DBT6	1418;1431;1439;1257;1270;1374;175	A0A087WQS0	A0A087WQS0		Tns1		0.333106	0	2.04815e-10	54.152	51.155	54.152	0	0		NaN	0	0		NaN	0	0		NaN	0.333106	0	2.04815e-10	54.152	0	0		NaN	0	0		NaN					0.332769	0	2.04398e-07	46.307	0	0		NaN	0
A0A087WQS0;A0A1D5RM59;E9Q0S6;A0A087WRU0;A0A087WQ94;A0A087WQM0;Q9DBT6	1419;1432;1440;1258;1271;1375;176	A0A087WQS0	A0A087WQS0		Tns1		0.333106	0	2.04815e-10	54.152	51.155	54.152	0	0		NaN	0	0		NaN	0	0		NaN	0.333106	0	2.04815e-10	54.152	0	0		NaN	0	0		NaN					0.332769	0	2.04398e-07	46.307	0	0		NaN	0
A0A087WQS0;A0A1D5RM59;E9Q0S6;A0A087WRU0;A0A087WQ94;A0A087WQM0;Q9DBT6	1422;1435;1443;1261;1274;1378;179	A0A087WQS0	A0A087WQS0		Tns1		0.64888	5.53533	9.69072e-30	76.004	65.166	71.709	0.399597	1.10477	1.97391e-14	60.527	0.64888	5.53533	5.5902e-28	71.709	0	0		NaN	0.333106	0	2.04815e-10	54.152	0.410614	1.26287	1.90352e-10	55.35	0.398175	1.07607	5.64619e-10	51.242	0.397427	1.05756	4.32678e-08	50.522	0.332769	0	2.04398e-07	46.307	0	0		NaN	0.387339
A0A087WQS0;A0A1D5RM59;E9Q0S6;A0A087WRU0;A0A087WQ94;A0A087WQM0;Q9DBT6	1427;1440;1448;1266;1279;1383;184	A0A087WQS0	A0A087WQS0		Tns1		0.49864	0.963868	9.03465e-21	67.353	60.996	57.432	0	0		NaN	0	0		NaN	0.482556	0	9.03465e-21	67.353	0	0		NaN	0	0		NaN	0	0		NaN					0	0		NaN	0.49864	0.963868	3.76358e-13	57.432	0
A0A087WQS0;A0A1D5RM59;E9Q0S6;A0A087WRU0;A0A087WQ94;A0A087WQM0;Q9DBT6	1430;1443;1451;1269;1282;1386;187	A0A087WQS0	A0A087WQS0		Tns1		0.940221	12.8853	6.49457e-59	100.36	92.597	100.1	0.832385	7.11882	6.49457e-59	100.36	0.938046	14.3071	4.30158e-40	85.412	0.78805	6.18805	9.03465e-21	67.353	0.92723	11.9148	8.15337e-34	77.925	0.814731	7.11584	6.91522e-34	78.588	0.940221	12.8853	9.53329e-59	100.1	0.900159	10.726	5.23424e-40	84.741	0.925529	11.8228	9.96032e-34	76.956	0.811927	6.46685	4.43473e-11	56.728	0.712665
A0A087WQS0;A0A1D5RM59;E9Q0S6;A0A087WRU0;A0A087WQ94;A0A087WQM0;Q9DBT6	1432;1445;1453;1271;1284;1388;189	A0A087WQS0	A0A087WQS0		Tns1		0.545968	0.91645	1.85108e-07	46.772	39.897	46.772	0	0		NaN	0	0		NaN	0	0		NaN	0	0		NaN	0	0		NaN	0	0		NaN					0	0		NaN	0	0		NaN	0
A0A087WQS0;A0A1D5RM59;E9Q0S6;A0A087WRU0;A0A087WQ94;A0A087WQM0;Q9DBT6;A0A087WPC7	1395;1408;1416;1234;1247;1351;152;110	A0A087WQS0	A0A087WQS0		Tns1		0.519306	0.366901	2.34463e-14	63.033	51.11	63.033	0.498093	0.290347	1.85685e-05	43.728	0	0		NaN	0	0		NaN	0	0		NaN	0	0		NaN	0.301168	1.23255	8.45644e-10	54.324	0.519306	0.366901	2.34463e-14	63.033	0	0		NaN	0	0		NaN	0
A0A087WQS0;A0A1D5RM59;E9Q0S6;A0A087WRU0;A0A087WQ94;A0A087WQM0;Q9DBT6;A0A087WPC7	1402;1415;1423;1241;1254;1358;159;117	A0A087WQS0	A0A087WQS0		Tns1		0.964695	14.7445	3.88173e-156	149.54	141.67	89.149	0.809282	6.36044	8.46316e-83	108.64	0.700976	5.23152	4.56474e-39	83.022	0.840654	9.77724	1.28032e-09	53.968	0.916271	11.4556	3.88173e-156	149.54	0.736145	6.83831	9.37604e-99	117.88	0.77691	6.23882	9.84119e-20	66.501	0.939968	14.8669	3.11974e-131	128.6	0.840496	7.74109	2.68889e-47	88.842	0.964695	14.7445	3.463e-47	89.149	0.730789
A0A087WQS0;A0A1D5RM59;E9Q0S6;A0A087WRU0;A0A087WQ94;A0A087WQM0	616;616;616;447;447;572	A0A087WQS0	A0A087WQS0		Tns1		1	51.2675	0.00376443	51.268	13.181	51.268					1	51.2675	0.00376443	51.268	0	0		NaN	1	51.2675	0.00376443	51.268					0	0		NaN					1	51.2675	0.00376443	51.268	1	44.2031	0.00978101	44.203	1
A0A087WQS0;A0A1D5RM59;E9Q0S6;A0A087WRU0;A0A087WQ94;A0A087WQM0	1208;1221;1229;1047;1060;1164	A0A087WQS0	A0A087WQS0		Tns1		0.108549	0	9.57461e-19	46.186	41.742	41.764					0.108549	0	2.07982e-14	41.764	0	0		NaN	0	0		NaN	0.101203	0	2.86828e-14	40.533	0.108198	0	1.75658e-14	42.269	0.106175	0	9.57461e-19	46.186									0
A0A087WQS0;A0A1D5RM59;E9Q0S6;A0A087WRU0;A0A087WQ94;A0A087WQM0	1211;1224;1232;1050;1063;1167	A0A087WQS0	A0A087WQS0		Tns1		0.170952	0	3.3736e-25	51.954	47.919	51.954	0.108416	0	9.57461e-19	46.186	0.108549	0	2.07982e-14	41.764	0.117016	0	8.72355e-15	43.65	0	0		NaN	0.101203	0	2.86828e-14	40.533	0.108198	0	1.75658e-14	42.269	0.106175	0	9.57461e-19	46.186	0.170952	0	3.3736e-25	51.954					0
A0A087WQS0;A0A1D5RM59;E9Q0S6;A0A087WRU0;A0A087WQ94;A0A087WQM0	1213;1226;1234;1052;1065;1169	A0A087WQS0	A0A087WQS0		Tns1		0.170952	0	3.3736e-25	51.954	47.919	51.954	0.108416	0	9.57461e-19	46.186	0.108549	0	2.07982e-14	41.764	0.117016	0	8.72355e-15	43.65	0	0		NaN	0.101203	0	2.86828e-14	40.533	0.108198	0	1.75658e-14	42.269	0.106175	0	9.57461e-19	46.186	0.170952	0	3.3736e-25	51.954					0
A0A087WQS0;A0A1D5RM59;E9Q0S6;A0A087WRU0;A0A087WQ94;A0A087WQM0	1214;1227;1235;1053;1066;1170	A0A087WQS0	A0A087WQS0		Tns1		0.170952	0	3.3736e-25	51.954	47.919	51.954	0.108416	0	9.57461e-19	46.186	0.108549	0	2.07982e-14	41.764	0.117016	0	8.72355e-15	43.65	0	0		NaN	0.101203	0	2.86828e-14	40.533	0.108198	0	1.75658e-14	42.269	0.106175	0	9.57461e-19	46.186	0.170952	0	3.3736e-25	51.954					0
A0A087WQS0;A0A1D5RM59;E9Q0S6;A0A087WRU0;A0A087WQ94;A0A087WQM0	1218;1231;1239;1057;1070;1174	A0A087WQS0	A0A087WQS0		Tns1		0.117016	0	9.57461e-19	46.186	41.742	43.65	0.108416	0	9.57461e-19	46.186	0.108549	0	2.07982e-14	41.764	0.117016	0	8.72355e-15	43.65	0	0		NaN	0.101203	0	2.86828e-14	40.533	0.108198	0	1.75658e-14	42.269	0.106175	0	9.57461e-19	46.186									0
A0A087WQS0;A0A1D5RM59;E9Q0S6;A0A087WRU0;A0A087WQ94;A0A087WQM0	1221;1234;1242;1060;1073;1177	A0A087WQS0	A0A087WQS0		Tns1		0.117016	0	9.57461e-19	46.186	41.742	43.65	0.108416	0	9.57461e-19	46.186	0.108549	0	2.07982e-14	41.764	0.117016	0	8.72355e-15	43.65	0	0		NaN	0.101203	0	2.86828e-14	40.533	0.108198	0	1.75658e-14	42.269	0.106175	0	9.57461e-19	46.186									0
A0A087WQS0;A0A1D5RM59;E9Q0S6;A0A087WRU0;A0A087WQ94;A0A087WQM0	1223;1236;1244;1062;1075;1179	A0A087WQS0	A0A087WQS0		Tns1		0.117016	0	9.57461e-19	46.186	41.742	43.65	0.108416	0	9.57461e-19	46.186	0.108549	0	2.07982e-14	41.764	0.117016	0	8.72355e-15	43.65	0	0		NaN	0.101203	0	2.86828e-14	40.533	0.108198	0	1.75658e-14	42.269	0.106175	0	9.57461e-19	46.186									0
A0A087WQS0;A0A1D5RM59;E9Q0S6;A0A087WRU0;A0A087WQ94;A0A087WQM0	1226;1239;1247;1065;1078;1182	A0A087WQS0	A0A087WQS0		Tns1		0.108416	0	9.57461e-19	46.186	42.073	46.186	0.108416	0	9.57461e-19	46.186					0	0		NaN	0	0		NaN	0	0		NaN																	0
A0A087WQS0;A0A1D5RM59;E9Q0S6;A0A087WS32;A0A087WP40	150;150;150;124;102	A0A087WQS0	A0A087WQS0		Tns1		0.367474	0.659662	3.23155e-05	41.087	31.239	41.087																													0.367474	0.659662	3.23155e-05	41.087	0	0		NaN	0
A0A087WQS0;A0A1D5RM59;E9Q0S6;A0A087WS32;A0A087WP40;A0A087WR29	154;154;154;128;106;46	A0A087WQS0	A0A087WQS0		Tns1		0.893702	9.28183	1.67711e-19	90.754	81.223	42.277	0.499995	0	1.01882e-05	61.641	0.874854	8.44533	2.61675e-06	68.919	0	0		NaN	0.598115	1.7288	0.000172435	44.005	0.876148	8.49678	1.54132e-06	69.594	0.499999	0	5.01306e-06	67.416	0.499994	0	3.67346e-06	68.257	0.499964	0	2.66365e-05	50.608	0.499988	0	8.9695e-06	58.671	0.853344
A0A087WQS0;A0A1D5RM59;E9Q0S6;A0A087WS32;A0A087WP40;A0A087WR29	156;156;156;130;108;48	A0A087WQS0	A0A087WQS0		Tns1		0.558486	1.02067	1.03578e-09	79.346	70.342	79.346	0.499995	0	1.01882e-05	61.641	0.517496	0.306002	5.32896e-05	44.105	0.558486	1.02067	1.03578e-09	79.346	0.516822	0.29474	7.34228e-05	43.198	0	0		NaN	0.499999	0	5.01306e-06	67.416	0.499994	0	3.67346e-06	68.257	0.544251	0.772942	2.66365e-05	50.608	0.517107	0.302164	8.9695e-06	58.671	0.499862
A0A087WQS0;A0A1D5RM59;E9Q0S6;A0A087WS32;A0A087WP40;A0A087WR29	167;167;167;141;119;59	A0A087WQS0	A0A087WQS0		Tns1		0.60873	3.35637	2.42182e-19	88.992	79.243	88.992	0.395303	0	2.54812e-13	85.619	0	0		NaN	0	0		NaN	0	0		NaN	0.60873	3.35637	2.42182e-19	88.992	0.361865	0	7.19586e-05	60.918	0	0		NaN	0.427402	0	5.10768e-06	52.72	0.3519	0	0.00185289	42.813	0
A0A087WQS0;A0A1D5RM59;E9Q0S6;A0A087WS32;A0A087WP40;A0A087WR29	169;169;169;143;121;61	A0A087WQS0	A0A087WQS0		Tns1		0.686421	4.10747	8.95918e-27	100.77	80.667	100.77	0	0		NaN	0	0		NaN	0	0		NaN	0.686421	4.10747	8.95918e-27	100.77	0	0		NaN	0	0		NaN	0	0		NaN	0.427402	0	5.10768e-06	52.72	0	0		NaN	0
A0A087WQS0;A0A1D5RM59;E9Q0S6;A0A087WRU0;A0A087WQ94;A0A087WQM0	847;847;847;678;678;803	A0A087WQS0	A0A087WQS0		Tns1		0.628841	4.71039	5.80118e-32	94.594	76.999	84.946	0.462266	0.971644	2.45746e-18	81.003	0.589503	6.34297	3.4029e-07	54.658	0.604455	2.80318	8.48897e-13	68.401	0	0		NaN	0.628841	4.71039	2.74881e-23	84.946	0.351761	0.823475	1.77029e-07	55.994					0.302721	0	9.82997e-15	74.819	0.321126	0	6.02314e-08	56.95	0.479465
A0A087WQS0;A0A1D5RM59;E9Q0S6;A0A087WRU0;A0A087WQ94;A0A087WQM0	851;851;851;682;682;807	A0A087WQS0	A0A087WQS0		Tns1		0.550229	1.29173	4.20244e-23	83.063	59.053	67.928	0.374294	0	2.45746e-18	81.003	0	0		NaN	0	0		NaN	0.404358	2.54843	2.55932e-05	41.06					0.512076	1.39803	4.20244e-23	83.063					0.453495	0	9.82997e-15	74.819	0.321126	0	6.02314e-08	56.95	0.489189
A0A087WQS0;A0A1D5RM59;E9Q0S6;A0A087WRU0;A0A087WQ94;A0A087WQM0	952;952;952;783;783;908	A0A087WQS0	A0A087WQS0		Tns1		0.989603	22.2658	9.3916e-13	66.853	58.665	66.853	0	0		NaN					0.937659	12.5245	1.42392e-05	40.937	0.949987	14.7161	1.18526e-06	50.827					0.989603	22.2658	9.3916e-13	66.853									0	0		NaN
A0A087WQS0;A0A1D5RM59;E9Q0S6;A0A087WRU0;A0A087WQ94;A0A087WQM0	963;963;963;794;794;919	A0A087WQS0	A0A087WQS0		Tns1		0.814263	6.422	1.04588e-12	67.413	60.908	67.413	0	0		NaN					0.813403	8.21662	1.93475e-05	40.937	0.814263	6.422	1.04588e-12	67.413	0.497877	0	1.28642e-05	43.888	0.494238	0	1.11972e-05	45.608					0.498601	0	8.83629e-06	46.839	0	0		NaN	0.498811
A0A087WQS0;A0A1D5RM59;E9Q0S6;A0A087WRU0;A0A087WQ94;A0A087WQM0	966;966;966;797;797;922	A0A087WQS0	A0A087WQS0		Tns1		0.951636	12.9487	1.75728e-10	58.92	47.713	58.92	0.951636	12.9487	1.75728e-10	58.92									0.818211	6.55003	1.33683e-05	42.806	0.497877	0	1.28642e-05	43.888	0.494238	0	1.11972e-05	45.608					0.498601	0	8.83629e-06	46.839	0	0		NaN	0.498811
A0A087WQS0;A0A1D5RM59;E9Q0S6;A0A087WRU0;A0A087WQ94;A0A087WQM0;Q9DBT6	1514;1527;1535;1353;1366;1470;271	A0A087WQS0	A0A087WQS0		Tns1		0.999958	43.7498	1.16144e-08	93.839	58.129	76.165	0.999465	32.7114	3.07983e-05	76.255	0.999575	33.7191	1.02543e-05	83.137	0.986471	18.6283	0.00302063	49.5	0.999943	42.4313	9.46073e-05	72.62	0.999935	41.89	1.16144e-08	93.839	0.999659	34.6772	0.00010063	72.29	0.99978	36.5724	1.90034e-05	80.014	0.998007	26.9968	0.000336332	66.262	0.994654	22.6966	0.0018407	53.569	0.997729
A0A087WQS0;A0A1D5RM59;E9Q0S6;A0A087WRU0;A0A087WQ94;A0A087WQM0	836;836;836;667;667;792	A0A087WQS0	A0A087WQS0		Tns1		1	68.5426	0.000226035	87.323	47.321	82.749	0.999999	59.0683	0.000226035	87.323	0.999999	59.874	0.000990327	81.338	0.999996	54.0878	0.00157401	65.252	0.999988	49.1425	0.000763954	63.816	0.999999	62.3097	0.000756711	80.688	1	68.5426	0.000782508	82.749	0.999992	50.7506	0.00207145	71.451	0.999999	61.6475	0.000668357	75.854	0.999999	61.6475	0.00175459	75.854	0.999999
A0A087WQS0;A0A1D5RM59;E9Q0S6;A0A087WRU0;A0A087WQ94;A0A087WQM0	840;840;840;671;671;796	A0A087WQS0	A0A087WQS0		Tns1		1	70.9155	0.00172453	90.906	51.601	90.906	0	0		NaN	0.999998	57.7332	0.00717182	62.823	0	0		NaN													0	0		NaN	0	0		NaN					0
A0A087WQS0;A0A1D5RM59;E9Q0S6;A0A087WRU0;A0A087WQ94;A0A087WQM0;Q9DBT6	1473;1486;1494;1312;1325;1429;230	A0A087WQS0	A0A087WQS0		Tns1		0.286058	0	1.36633e-32	58.421	53.845	58.421									0.122071	0	4.1483e-14	42.262	0.129973	0	1.50797e-19	50.889	0.0977122	0	3.62804e-14	43.478					0.2077	0	5.22865e-14	42.461	0.286058	0	1.36633e-32	58.421	0.237783	0	8.54991e-14	40.84
A0A087WQS0;A0A1D5RM59;E9Q0S6;A0A087WRU0;A0A087WQ94;A0A087WQM0;Q9DBT6	1474;1487;1495;1313;1326;1430;231	A0A087WQS0	A0A087WQS0		Tns1		0.286058	0	1.36633e-32	58.421	53.845	58.421									0.122071	0	4.1483e-14	42.262	0.129973	0	1.50797e-19	50.889	0.0977122	0	3.62804e-14	43.478					0.2077	0	5.22865e-14	42.461	0.286058	0	1.36633e-32	58.421	0.237783	0	8.54991e-14	40.84
A0A087WQS0;A0A1D5RM59;E9Q0S6;A0A087WRU0;A0A087WQ94;A0A087WQM0;Q9DBT6	1476;1489;1497;1315;1328;1432;233	A0A087WQS0	A0A087WQS0		Tns1		0.286058	0	1.36633e-32	58.421	53.845	58.421									0.122071	0	4.1483e-14	42.262	0.129973	0	1.50797e-19	50.889	0.0977122	0	3.62804e-14	43.478					0.2077	0	5.22865e-14	42.461	0.286058	0	1.36633e-32	58.421	0.237783	0	8.54991e-14	40.84	0.142458
A0A087WQS0;A0A1D5RM59;E9Q0S6;A0A087WRU0;A0A087WQ94;A0A087WQM0;Q9DBT6	1482;1495;1503;1321;1334;1438;239	A0A087WQS0	A0A087WQS0		Tns1		0.286028	0	1.63539e-54	70.249	65.581	58.421	0.183476	0	1.63539e-54	70.249	0.146533	0	2.4604e-19	50.479	0.122071	0	4.1483e-14	42.262	0.122132	0	2.62534e-14	43.271	0.0977122	0	3.62804e-14	43.478									0.286028	0	1.36633e-32	58.421
A0A087WQS0;A0A1D5RM59;E9Q0S6;A0A087WRU0;A0A087WQ94;A0A087WQM0;Q9DBT6	1485;1498;1506;1324;1337;1441;242	A0A087WQS0	A0A087WQS0		Tns1		0.286028	0	1.36633e-32	58.421	53.845	58.421					0.146533	0	2.4604e-19	50.479	0.122071	0	4.1483e-14	42.262	0.122132	0	2.62534e-14	43.271	0.0977122	0	3.62804e-14	43.478									0.286028	0	1.36633e-32	58.421
A0A087WQS0;A0A1D5RM59;E9Q0S6;A0A087WRU0;A0A087WQ94;A0A087WQM0;Q9DBT6	1489;1502;1510;1328;1341;1445;246	A0A087WQS0	A0A087WQS0		Tns1		0.128848	0	2.4604e-19	50.479	48.062	50.479					0.128848	0	2.4604e-19	50.479	0.122071	0	4.1483e-14	42.262	0.122132	0	2.62534e-14	43.271	0.0977122	0	3.62804e-14	43.478
A0A087WQS0;A0A1D5RM59;E9Q0S6;A0A087WRU0;A0A087WQ94;A0A087WQM0;Q9DBT6	1504;1517;1525;1343;1356;1460;261	A0A087WQS0	A0A087WQS0		Tns1		0.64168	5.00449	1.14119e-18	47.761	43.273	47.761													0.64168	5.00449	1.14119e-18	47.761																					0.314363
A0A087WQS0;A0A1D5RM59;E9Q0S6;A0A087WRU0;A0A087WQ94;A0A087WQM0;Q9DBT6;A0A087WPC7	1354;1367;1375;1193;1206;1310;111;69	A0A087WQS0	A0A087WQS0		Tns1		0.836057	7.8415	5.81416e-40	73.422	59.279	73.422	0	0		NaN	0.700637	7.45791	2.23989e-07	42.269	0	0		NaN	0.836057	7.8415	5.81416e-40	73.422	0	0		NaN	0	0		NaN	0	0		NaN					0	0		NaN	0.67257
A0A087WQS0;A0A1D5RM59;E9Q0S6;A0A087WRU0;A0A087WQ94;A0A087WQM0;Q9DBT6;A0A087WPC7	1364;1377;1385;1203;1216;1320;121;79	A0A087WQS0	A0A087WQS0		Tns1		0.709762	7.34671	6.06861e-22	60.312	49.104	56.712	0	0		NaN	0.416812	0.850997	2.9627e-11	48.931	0	0		NaN	0	0		NaN	0.611232	6.22148	6.06861e-22	60.312	0.709762	7.34671	1.54535e-16	56.712	0	0		NaN					0	0		NaN	0
A0A087WQS0;A0A1D5RM59;E9Q0S6;A0A087WRU0;A0A087WQ94;A0A087WQM0;Q9DBT6;A0A087WPC7	1376;1389;1397;1215;1228;1332;133;91	A0A087WQS0	A0A087WQS0		Tns1		0.852419	8.36977	2.23487e-71	90.699	66.423	73.422	0.797466	7.20191	1.29675e-39	70.151	0	0		NaN	0.852419	8.36977	5.81416e-40	73.422	0.549842	3.86857	4.06807e-30	66.519	0.541681	2.94472	2.85025e-30	64.72	0.628789	5.49374	9.97968e-16	55.3	0.79519	6.11666	2.23487e-71	90.699	0.743706	6.79173	1.09934e-15	55.083	0.774986	5.75612	2.84542e-39	70.151	0.755912
A0A087WQS0;A0A1D5RM59;E9Q0S6;A0A087WRU0;A0A087WQ94;A0A087WQM0	1182;1195;1203;1021;1034;1138	A0A087WQS0	A0A087WQS0		Tns1		0.999545	33.4214	6.67416e-14	82.609	72.27	82.609	0.990095	20.0261	7.44571e-07	71.592	0.976123	16.1155	5.70506e-07	72.644	0.981972	17.4219	7.05579e-05	45.369													0.999545	33.4214	6.67416e-14	82.609					0.99169	20.7938	9.94572e-06	62.966	0
A0A087WQS0;A0A1D5RM59;E9Q0S6;A0A087WRU0;A0A087WQ94;A0A087WQM0	930;930;930;761;761;886	A0A087WQS0	A0A087WQS0		Tns1		0.676428	3.23044	1.09895e-08	61.102	51.687	49.593	0.528756	0.507568	1.12448e-08	58.997	0.522031	0.414502	1.83071e-05	43.534	0.528158	0.500444	1.13064e-08	58.49	0.53033	0.530038	1.10547e-08	60.564	0.542316	0.743796	1.12448e-08	58.997	0	0		NaN	0	0		NaN	0.676428	3.23044	3.39566e-06	49.593	0	0		NaN	0.665568
A0A087WQS0;A0A1D5RM59;E9Q0S6;A0A087WRU0;A0A087WQ94;A0A087WQM0;A0A087WSC8	636;636;636;467;467;592;9	A0A087WQS0	A0A087WQS0		Tns1		0.999983	48.4296	1.24079e-05	74.987	59.786	68.034	0	0		NaN	0	0		NaN	0.99945	33.5865	1.24079e-05	74.987	0.999269	32.3816	0.000553786	53.754	0.999978	47.0205	1.24079e-05	74.987					0.999863	39.6579	0.000275779	58.487	0.995	23.2847	0.000133112	63.76	0.999824	38.1969	5.25799e-05	68.809	0.999959
A0A087WQS0;A0A1D5RM59;E9Q0S6;A0A087WRU0;A0A087WQ94;A0A087WQM0;A0A087WSC8	646;646;646;477;477;602;19	A0A087WQS0	A0A087WQS0		Tns1		0.999864	39.5634	1.09917e-07	86.944	72.278	61.097	0.999029	31.0211	5.25799e-05	68.809	0.998209	27.8665	6.30972e-06	77.078	0.999698	36.4521	2.19486e-05	72.891	0.998547	29.3293	1.09917e-07	86.944	0.998677	29.6772	3.43248e-06	79.633	0.999864	39.5634	3.99413e-05	69.602	0.997817	26.5999	5.25799e-05	68.809	0.999644	35.686	1.87477e-07	85.837	0.99984	38.9234	7.66827e-05	59.862	0.998216
A0A087WQS0;A0A1D5RM59;E9Q0S6;A0A087WRU0;A0A087WQ94;A0A087WQM0	974;974;974;805;805;930	A0A087WQS0	A0A087WQS0		Tns1		0.156962	0	8.08561e-10	40.112	38.285	40.112					0.156962	0	8.08561e-10	40.112
A0A087WQS0;A0A1D5RM59;E9Q0S6;A0A087WRU0;A0A087WQ94;A0A087WQM0	975;975;975;806;806;931	A0A087WQS0	A0A087WQS0		Tns1		0.231278	0	5.66561e-10	40.347	38.561	40.347	0.231278	0	5.66561e-10	40.347	0.156962	0	8.08561e-10	40.112
A0A087WQS0;A0A1D5RM59;E9Q0S6;A0A087WRU0;A0A087WQ94;A0A087WQM0	980;980;980;811;811;936	A0A087WQS0	A0A087WQS0		Tns1		0.156962	0	8.08561e-10	40.112	38.285	40.112					0.156962	0	8.08561e-10	40.112
A0A087WQS0;A0A1D5RM59;E9Q0S6;A0A087WRU0;A0A087WQ94;A0A087WQM0	983;983;983;814;814;939	A0A087WQS0	A0A087WQS0		Tns1		0.156962	0	8.08561e-10	40.112	38.285	40.112					0.156962	0	8.08561e-10	40.112
A0A087WQS0;A0A1D5RM59;E9Q0S6;A0A087WRU0;A0A087WQ94;A0A087WQM0	984;984;984;815;815;940	A0A087WQS0	A0A087WQS0		Tns1		0.156962	0	8.08561e-10	40.112	38.285	40.112					0.156962	0	8.08561e-10	40.112
A0A087WQS0;A0A1D5RM59;E9Q0S6;A0A087WRU0;A0A087WQ94;A0A087WQM0	1126;1126;1126;957;957;1082	A0A087WQS0	A0A087WQS0		Tns1		1	49.0967	0.0484692	49.097	26.86	49.097																													1	49.0967	0.0484692	49.097
A0A087WQS0;A0A1D5RM59;E9Q0S6;A0A087WRU0;A0A087WQ94;A0A087WQM0	790;790;790;621;621;746	A0A087WQS0	A0A087WQS0		Tns1		1	73.5199	3.55385e-09	79.013	61.935	79.013	1	64.6916	2.66542e-05	65.107	0.99986	38.5405	0.000809033	40.52	0.999996	53.8304	2.81141e-05	56.959	1	73.5199	3.55385e-09	79.013	0.999993	51.4653	2.81141e-05	56.959	0.999987	49.0018	9.7743e-06	56.055	0.999999	61.692	3.12697e-05	61.692	1	64.9185	3.10768e-06	70.412	0.999999	60.8419	2.0654e-05	66.335	0.999999
A0A087WQS0;A0A1D5RM59;E9Q0S6;A0A087WRU0;A0A087WQ94;A0A087WQM0	792;792;792;623;623;748	A0A087WQS0	A0A087WQS0		Tns1		1	65.8129	1.27752e-13	84.874	69.998	79.013	0.999998	56.819	6.56375e-07	74.816	0.999686	35.0356	7.54723e-06	68.919	0.999987	48.8544	1.35788e-05	67.605	1	65.8129	3.55385e-09	79.013	0.999987	48.8544	6.25344e-09	76.151	0.999963	44.3265	1.35788e-05	76.151	0.999998	56.3077	3.12697e-05	61.692	0.999999	62.3076	1.27752e-13	84.874	0.999999	58.231	2.0654e-05	66.335	0.999997
A0A087WQS0;A0A1D5RM59;E9Q0S6;A0A087WRU0;A0A087WQ94;A0A087WQM0	897;897;897;728;728;853	A0A087WQS0	A0A087WQS0		Tns1		0.556185	0.980657	3.03355e-20	70.453	63.093	62.684	0.534021	0.59256	1.74086e-11	59.573					0.547827	0.837775	1.23526e-07	52.483	0.537191	0.671811	3.08821e-20	70.352	0.556185	0.980657	1.28468e-11	62.684					0.529904	0.543114	1.23526e-07	51.568	0.500062	0.0013475	3.03355e-20	70.453	0.532941	0.613205	1.84787e-05	42.347
A0A087WQS0;A0A1D5RM59;E9Q0S6;A0A087WRU0;A0A087WQ94;A0A087WQM0	899;899;899;730;730;855	A0A087WQS0	A0A087WQS0		Tns1		0.879052	8.61502	2.34732e-24	77.287	63.695	64.203	0.803297	6.1127	2.34732e-24	77.287	0.879052	8.61502	2.29426e-16	64.203									0.798693	5.99186	2.19215e-06	49.793	0.850381	7.55691	1.28468e-11	62.684	0.819343	6.5757	1.54827e-16	66.045	0.874942	8.51752	1.86781e-11	59.275					0.81427
A0A087WQS0;A0A1D5RM59;E9Q0S6;A0A087WRU0;A0A087WQ94;A0A087WQM0	1247;1260;1268;1086;1099;1203	A0A087WQS0	A0A087WQS0		Tns1		0.835828	7.06825	1.61022e-18	120.57	103.32	66.267	0.5	0	5.73024e-13	109.72	0.5	0	2.73768e-13	111.63	0.5	0	7.36611e-05	73.435	0.5	0	1.61022e-18	120.57	0.5	0	7.07779e-05	77.593	0.5	0	2.13907e-14	113.24	0.5	0	4.85791e-12	97.779	0.5	0	7.14653e-06	85.813	0.835828	7.06825	0.000164873	66.267	0.5
A0A087WQS0;A0A1D5RM59;E9Q0S6;A0A087WRU0;A0A087WQ94;A0A087WQM0	1248;1261;1269;1087;1100;1204	A0A087WQS0	A0A087WQS0		Tns1		0.5	0	1.61022e-18	120.57	103.32	111.63	0.5	0	5.73024e-13	109.72	0.5	0	2.73768e-13	111.63	0.5	0	7.36611e-05	73.435	0.5	0	1.61022e-18	120.57	0.5	0	7.07779e-05	77.593	0.5	0	2.13907e-14	113.24	0.5	0	4.85791e-12	97.779	0.5	0	7.14653e-06	85.813					0.5
A0A087WQS0;A0A1D5RM59;E9Q0S6;A0A087WRU0;A0A087WQ94;A0A087WQM0;Q9DBT6;A0A087WPC7	1325;1338;1346;1164;1177;1281;82;40	A0A087WQS0	A0A087WQS0		Tns1		0.999969	44.8657	1.67573e-29	114.74	114.74	96.591	0.999747	35.9794	1.67573e-29	114.74	0.99981	37.3207	1.40083e-22	106.13	0.999262	31.5197	7.96474e-22	101.36	0.999969	44.7457	7.73425e-26	107.37	0.999639	34.2049	2.98708e-08	88.087	0.998727	28.7448	1.17988e-24	107.14	0.999744	33.883	8.03804e-22	101.3	0.999398	32.4181	2.26396e-10	91.207	0.999969	44.8657	3.38196e-15	96.591	0.984529
A0A087WQS0;A0A1D5RM59;E9Q0S6;A0A087WRU0;A0A087WQ94;A0A087WQM0	743;743;743;574;574;699	A0A087WQS0	A0A087WQS0		Tns1		0.190272	0	2.57197e-07	49.088	34.605	49.088	0	0		NaN									0	0		NaN	0	0		NaN	0	0		NaN	0	0		NaN					0	0		NaN
A0A087WQS0;A0A1D5RM59;E9Q0S6;A0A087WRU0;A0A087WQ94;A0A087WQM0	744;744;744;575;575;700	A0A087WQS0	A0A087WQS0		Tns1		0.190272	0	2.57197e-07	49.088	34.605	49.088	0	0		NaN									0	0		NaN	0	0		NaN	0	0		NaN	0	0		NaN					0	0		NaN
A0A087WQS0;A0A1D5RM59;E9Q0S6;A0A087WRU0;A0A087WQ94;A0A087WQM0	746;746;746;577;577;702	A0A087WQS0	A0A087WQS0		Tns1		0.190272	0	2.57197e-07	49.088	34.605	49.088	0	0		NaN									0	0		NaN	0	0		NaN	0	0		NaN	0	0		NaN					0	0		NaN
A0A087WQS0;A0A1D5RM59;E9Q0S6;A0A087WRU0;A0A087WQ94;A0A087WQM0	752;752;752;583;583;708	A0A087WQS0	A0A087WQS0		Tns1		0.486833	0	6.42324e-20	66.083	44.002	66.083	0	0		NaN	0.325399	0	2.95827e-05	41.084	0.486833	0	6.42324e-20	66.083	0.33701	0	6.73164e-20	65.901	0	0		NaN	0	0		NaN	0	0		NaN	0.445582	0	9.36341e-10	53.615	0.444053	0	2.42528e-05	41.133	0.410785
A0A087WQS0;A0A1D5RM59;E9Q0S6;A0A087WRU0;A0A087WQ94;A0A087WQM0	754;754;754;585;585;710	A0A087WQS0	A0A087WQS0		Tns1		0.486833	0	6.42324e-20	66.083	44.002	66.083	0	0		NaN	0.325399	0	2.95827e-05	41.084	0.486833	0	6.42324e-20	66.083	0.33701	0	6.73164e-20	65.901	0	0		NaN	0	0		NaN	0	0		NaN	0.445582	0	9.36341e-10	53.615	0.444053	0	2.42528e-05	41.133	0.410785
A0A087WQS0;A0A1D5RM59;E9Q0S6;A0A087WRU0;A0A087WQ94;A0A087WQM0;Q9DBT6	1637;1650;1658;1476;1489;1593;394	A0A087WQS0	A0A087WQS0		Tns1		0.860741	8.08691	0.00112122	50.897	43.352	48.112	0	0		NaN	0	0		NaN	0	0		NaN													0	0		NaN	0.860741	8.08691	0.00195921	48.112					0.559758
A0A087WQS0;A0A1D5RM59;E9Q0S6;A0A087WRU0;A0A087WQ94;A0A087WQM0;Q9DBT6	1546;1559;1567;1385;1398;1502;303	A0A087WQS0	A0A087WQS0		Tns1		0.613251	5.56357	8.44918e-08	48.467	36.271	48.467	0	0		NaN	0	0		NaN					0.613251	5.56357	8.44918e-08	48.467					0	0		NaN
A0A087WQS0;A0A1D5RM59;E9Q0S6;A0A087WRU0;A0A087WQ94;A0A087WQM0;Q9DBT6	1555;1568;1576;1394;1407;1511;312	A0A087WQS0	A0A087WQS0		Tns1		0.493093	5.28053	2.17525e-99	117.22	106.51	75.343	0.212866	0	4.29422e-15	62.302	0	0		NaN	0.286012	0.974926	1.30577e-58	99.372	0.30077	0	5.06207e-40	83.559					0.241877	0	2.34326e-10	52.329					0.493093	5.28053	4.74635e-29	75.343	0.375684	3.43867	1.38237e-10	54.425	0.312808
A0A087WQS0;A0A1D5RM59;E9Q0S6;A0A087WRU0;A0A087WQ94;A0A087WQM0;Q9DBT6	1557;1570;1578;1396;1409;1513;314	A0A087WQS0	A0A087WQS0		Tns1		0.312808	0	2.17525e-99	117.22	106.51	117.22	0.212866	0	4.29422e-15	62.302	0	0		NaN					0.30077	0	5.06207e-40	83.559					0.241877	0	2.34326e-10	52.329	0.257869	0	9.93522e-34	76.97									0.312808
A0A087WQS0;A0A1D5RM59;E9Q0S6;A0A087WRU0;A0A087WQ94;A0A087WQM0;Q9DBT6	1558;1571;1579;1397;1410;1514;315	A0A087WQS0	A0A087WQS0		Tns1		0.312808	0	2.17525e-99	117.22	106.51	117.22	0.212866	0	4.29422e-15	62.302	0	0		NaN					0.30077	0	5.06207e-40	83.559					0.241877	0	2.34326e-10	52.329	0.257869	0	9.93522e-34	76.97									0.312808
A0A087WQS0;A0A1D5RM59;E9Q0S6;A0A087WRU0;A0A087WQ94;A0A087WQM0	509;509;509;340;340;465	A0A087WQS0	A0A087WQS0		Tns1		0.99996	44.155	3.57391e-16	97.911	89.048	97.911	0.999412	32.3411	1.63766e-11	83.617	0.998698	28.8569	6.1792e-06	85.288	0.99996	44.155	4.45831e-11	97.911	0.99911	30.5244	3.57391e-16	83.314	0.995206	23.1954	9.66925e-16	76.522	0.998921	29.6815	8.07188e-06	84.289	0.999223	31.2372	1.10596e-07	85.845	0.993197	21.654	4.63748e-11	87.001	0.999527	33.4777	4.19355e-07	75.479	0.999547
A0A087WQS0;A0A1D5RM59;E9Q0S6;A0A087WRU0;A0A087WQ94;A0A087WQM0	514;514;514;345;345;470	A0A087WQS0	A0A087WQS0		Tns1		0.348422	0.29298	1.34519e-15	53.615	48.129	44.021	0	0		NaN	0	0		NaN	0	0		NaN					0	0		NaN	0	0		NaN					0	0		NaN	0.337916	0	4.19355e-07	40.764	0.348422
A0A087WQS0;A0A1D5RM59;E9Q0S6;A0A087WRU0;A0A087WQ94;A0A087WQM0;Q9DBT6	1578;1591;1599;1417;1430;1534;335	A0A087WQS0	A0A087WQS0		Tns1		0.975632	16.0329	7.12334e-08	89.301	83.819	76.522	0.964278	14.3127	2.06426e-05	79.492	0.800002	6.02067	1.13797e-05	82.543	0.967151	14.6897	7.12334e-08	89.301	0.951451	12.9222	9.97242e-05	72.34	0.964278	14.3127	2.06426e-05	79.492	0.800024	6.02132	0.000272925	67.456	0.946584	12.4867	0.000393855	65.179	0.849064	7.50184	0.000470977	63.727	0.943355	12.2154	0.000220673	68.44	0.964278
A0A087WR45;Q3UKG2	848;844	A0A087WR45	A0A087WR45		Prob1		0.999916	41.1962	4.92987e-06	62.362	55.472	57.496	0.99982	37.5781	6.0897e-06	62.362	0.996045	24.159	8.37478e-05	44.415	0.99838	28.7244	0.000184043	41.912	0	0		NaN	0.997842	27.5681	0.000230388	40.756	0	0		NaN	0.999149	31.2012	2.05055e-05	49.973	0.999916	41.1962	4.92987e-06	57.496	0.987597	19.2714	0.000215158	41.136	0.999421
A0A087WR45;Q3UKG2	376;372	A0A087WR45	A0A087WR45		Prob1		0.999902	40.0656	0.0030075	49.423	45.377	49.423	0.999751	36.029	0.00861172	40.725	0	0		NaN													0.999902	40.0656	0.0030075	49.423	0	0		NaN	0.999902	40.0656	0.0030075	49.423
A0A087WR45;Q3UKG2	494;490	A0A087WR45	A0A087WR45		Prob1		0.998997	29.9813	1.74278e-06	88.681	78.213	88.681	0.998997	29.9813	1.74278e-06	88.681	0.969274	14.9894	0.000194197	75.387	0.922035	10.7285	0.00111324	62.005	0.997176	25.4785	5.69511e-06	87.258	0.984875	18.1368	0.000102121	78.655	0.989369	19.6877	4.25141e-05	81.338	0.997616	26.2172	0.00012418	77.662	0.983755	17.8217	0.000460186	70.1	0.985504	18.324	7.2819e-05	79.974	0.838322
A0A087WR45;Q3UKG2	576;572	A0A087WR45	A0A087WR45		Prob1		1	77.5002	1.13989e-18	113.61	92.739	108.37	0.999972	45.4623	1.13989e-18	99.566	1	64.4344	2.31525e-05	78.692	1	90.5749	1.40055e-11	106.67	1	62.9957	4.02782e-07	88.338	1	76.0189	4.53345e-11	98.105	0.999999	60.2229	2.50463e-09	84.566	0.999998	57.8573	1.84094e-06	77.64	1	93.9677	2.36529e-14	113.61	1	64.9899	3.61119e-05	75.819	1
A0A087WR45;Q3UKG2	913;909	A0A087WR45	A0A087WR45		Prob1		0.889067	9.69682	1.30054e-30	84.948	77.236	47.666	0.889067	9.69682	2.61332e-05	47.666	0.502376	0.608416	8.41036e-08	55.049	0.814484	7.21269	1.32908e-20	71.528	0.816661	7.27037	1.06701e-20	72.425	0.820958	7.3925	1.04762e-11	62.19	0.762352	6.05696	1.11512e-16	64.779	0.809761	7.09957	1.86041e-18	69.782	0.784898	6.51885	1.30054e-30	84.948
A0A087WR45;Q3UKG2	915;911	A0A087WR45	A0A087WR45		Prob1		0.707431	6.43403	8.37951e-21	73.21	64.922	72.881	0.552905	2.16938	1.30759e-16	63.901									0.707431	6.43403	9.34063e-21	72.881	0.706148	6.83015	4.27269e-11	57.688	0.663765	5.31513	1.66476e-07	52.707	0.452179	0	1.39475e-07	53.475					0.663087	5.14078	3.13077e-11	59.282	0.700827
A0A087WR45;Q3UKG2	668;664	A0A087WR45	A0A087WR45		Prob1		0.999998	59.2057	5.69831e-52	116.21	97.677	116.21	0.994121	26.4695	4.12188e-06	54.672	0.968829	17.5647	1.90031e-07	72.771	0.98184	20.3747	3.41688e-06	62.684	0.997865	29.8235	2.60777e-07	71.535	0.993747	25.6507	3.89209e-06	55.127	0.997809	30.5987	4.9493e-06	53.033	0.991901	24.3823	4.3487e-06	54.223	0.989262	22.811	2.77538e-06	57.826	0.995404	25.8075	4.30248e-05	44.567	0.999998
A0A087WR45;Q3UKG2	440;436	A0A087WR45	A0A087WR45		Prob1		1	78.1383	1.91136e-13	110.66	78.138	110.66	0	0		NaN	0.999975	46.0065	0.00274716	55.401	1	68.3894	1.75898e-06	88.596	1	74.8135	7.1017e-07	100.93	1	69.9	6.86131e-07	94.191	1	71.9874	6.53047e-07	98.105	1	74.8135	7.1017e-07	100.93	1	76.2345	2.74743e-07	108.56	1	70.4464	1.91136e-13	90.653	1
A0A087WR45;Q3UKG2	446;442	A0A087WR45	A0A087WR45		Prob1		0.749903	0	0.000260934	41.763	37.095	41.763	0	0		NaN	0	0		NaN	0.749903	0	0.000260934	41.763	0	0		NaN	0	0		NaN	0	0		NaN	0	0		NaN	0	0		NaN	0	0		NaN
A0A087WR45;Q3UKG2	451;447	A0A087WR45	A0A087WR45		Prob1		1	79.7654	5.10654e-39	89.483	73.903	86.539	1	74.7972	2.90737e-19	89.483	0.999999	59.3618	1.15431e-32	79.021	1	65.7713	1.90565e-32	81.311	1	79.7654	1.30706e-32	86.539	0.999999	58.5554	3.11326e-19	71.98	1	67.2556	4.69846e-27	74.029	1	65.3664	3.14872e-27	79.022	1	71.2222	7.55079e-27	80.98	0.999998	56.1936	1.09466e-09	69.594	1
A0A087WR45;Q3UKG2	798;794	A0A087WR45	A0A087WR45		Prob1		0.999426	35.4184	1.88021e-60	94.642	84.927	42.789	0.845516	14.3755	1.12015e-58	90.03	0.999399	35.2172	0.00509998	40.066	0.555616	5.96608	4.17342e-43	80.112	0.677651	8.13541	1.88021e-60	94.642	0.500904	5.68774	6.97905e-25	67.871	0.998673	31.016	1.89169e-33	75.068	0.603831	6.80497	5.25791e-33	73.266	0.999426	35.4184	2.34808e-59	93.737	0.576926	6.36753	2.76662e-12	52.402	0.99942
A0A087WR45;Q3UKG2	422;418	A0A087WR45	A0A087WR45		Prob1		0.582541	1.44779	4.43277e-10	81.448	57.967	54.7	0.568467	1.20234	2.49283e-05	70.26	0.499928	0	0.000105299	43.799	0.499969	0	7.93305e-06	60.602	0.5	0	2.00313e-08	81.448	0.499982	0	8.63356e-06	62.684	0.567737	1.184	4.43277e-10	80.752	0.582541	1.44779	1.21039e-05	54.7	0.499997	0	8.85341e-06	63.337	0.499908	0	9.15524e-06	55.588	0.55195
A0A087WR45;Q3UKG2	423;419	A0A087WR45	A0A087WR45		Prob1		0.86739	8.17864	5.59126e-14	82.877	69.706	43.382	0.678425	3.24221	5.59126e-14	82.877	0.835091	7.089	0.000105299	43.799	0.863238	8.01924	7.93305e-06	60.602	0.86739	8.17864	2.00313e-08	81.448	0.499982	0	8.63356e-06	62.684	0.499889	0	0.000981702	41.621	0.499988	0	0.000385665	48.112	0.499997	0	8.85341e-06	63.337	0.499908	0	9.15524e-06	55.588	0.499977
A0A087WR45;Q3UKG2	396;392	A0A087WR45	A0A087WR45		Prob1		1	77.5576	3.45565e-39	97.346	92.907	93.966	0.999993	51.4022	9.17799e-18	80.293	0.999999	60.3864	4.70255e-14	73.574	1	66.2343	3.45565e-39	97.346	1	67.6958	1.03288e-23	87.952	0.999996	53.6867	4.57453e-18	81.297	1	73.005	5.59598e-39	95.123	0.999999	62.0856	1.14643e-22	82.342	0.999999	61.6622	5.99298e-30	89.272	1	66.8464	8.39487e-23	83.992	0.999999
A0A087WR45;Q3UKG2	398;394	A0A087WR45	A0A087WR45		Prob1		1	67.6812	3.45565e-39	97.346	92.907	87.952	0.999992	50.9472	9.17799e-18	80.293	0.999988	49.2542	4.70255e-14	73.574	0.999996	54.3724	3.45565e-39	97.346	1	67.6812	1.03288e-23	87.952	0.99996	43.9526	4.57453e-18	81.297	1	63.2267	5.59598e-39	95.123	0.999999	61.0241	1.14643e-22	82.342	0.999994	52.5054	5.99298e-30	89.272	0.999999	58.7171	8.39487e-23	83.992	0.999994
A0A087WR45;Q3UKG2	234;230	A0A087WR45	A0A087WR45		Prob1		0.997076	25.3493	7.62332e-05	79.82	55.529	79.82	0.990383	20.1343	0.000410659	71.085					0.824349	6.73148	0.00536243	45.879					0	0		NaN	0.994019	22.2324	0.000776766	67.08	0.99694	25.4401	0.00114587	63.408	0	0		NaN	0	0		NaN	0.997076
A0A087WR45;Q3UKG2	788;784	A0A087WR45	A0A087WR45		Prob1		0.234003	0	3.09807e-08	46.351	35.04	40.017																					0.232119	0	3.09807e-08	46.351
B7ZNJ1;A0A087WS56;B9EHT6;A0A087WSN6;Q3UHL6;A0A087WR50;P11276	2174;2264;2269;2294;2359;2384;2475	B7ZNJ1	B7ZNJ1	Fibronectin;Anastellin	Fn1		0.999999	64.6049	8.37287e-20	68.101	61.226	68.101	0.999973	47.9263	3.65813e-09	51.323					0.999999	61.7697	8.37287e-20	68.101	0.999997	56.4532	1.09937e-13	61.03	0	0		NaN	0.999996	56.7459	1.69964e-13	59.598									0.999996	56.6665	2.00838e-13	58.861
A0A087WR57;Q91XC8	26;49	A0A087WR57	A0A087WR57	Death-associated protein 1	Dap		0.385848	1.00326	5.02138e-48	96.54	90.312	73.036	0.333034	0	9.72902e-31	82.62					0.332583	0	5.02138e-48	96.54	0.303555	0	2.44457e-08	55.588	0.385848	1.00326	2.67907e-21	73.546	0.310205	0	3.46314e-21	72.805	0.332788	0	3.46314e-21	72.805	0.330552	0	4.32515e-21	72.805	0.331779	0	3.77758e-32	88.222	0.305101
A0A087WR57;Q91XC8	28;51	A0A087WR57	A0A087WR57	Death-associated protein 1	Dap		0.718659	6.67452	2.96813e-60	106.65	100.58	98.29	0.333034	0	9.72902e-31	82.62	0.677767	6.25791	3.36263e-25	79.365	0.671065	6.5799	5.02138e-48	96.54	0.446073	2.12063	2.96813e-60	106.65	0.315238	0	2.67907e-21	73.546	0.429421	1.80102	3.46314e-21	72.805	0.332788	0	3.46314e-21	72.805	0.330552	0	4.32515e-21	72.805	0.331779	0	3.77758e-32	88.222	0.718659
E9Q3K3;A0A087WRF2;Q8BXK8;A0A1D5RLD2	334;468;521;27	E9Q3K3	E9Q3K3	Arf-GAP with GTPase, ANK repeat and PH domain-containing protein 1	Agap1		1	40.552	7.79728e-05	68.034	60.123	40.552	0	0		NaN	0	0		NaN					0	0		NaN	1	51.5463	0.000759117	51.546	0	0		NaN	0	0		NaN	1	40.552	0.0018073	40.552	0	0		NaN	1
A0A087WRG0;A0A087WRM7;B2Z893	525;548;465	A0A087WRG0	A0A087WRG0		Pfkfb2		0.333294	0	0.0117578	43.282	31.792	43.282																																					0.333294
A0A087WRG0;A0A087WRM7;B2Z893	528;551;468	A0A087WRG0	A0A087WRG0		Pfkfb2		0.919337	11.0574	0.00318314	53.166	33.924	53.166																																					0.919337
A0A087WRG0;A0A087WRM7;B2Z892;Q6GTL7;P70265	468;468;447;468;469	A0A087WRG0	A0A087WRG0	6-phosphofructo-2-kinase/fructose-2,6-bisphosphatase 2;6-phosphofructo-2-kinase;Fructose-2,6-bisphosphatase	Pfkfb2		0.9945	22.7192	4.1996e-05	63.145	53.74	43.382	0.944379	12.3022	4.1996e-05	63.145	0.9945	22.7192	0.00361938	43.382	0.955243	13.3239	0.000311407	49.537	0.992807	21.5462	0.0041431	42.209	0.973943	15.8193	0.0007925	42.789	0.945466	12.4019	0.000144678	54.368					0.499682	0	0.000590629	45.115	0.834672	7.05187	0.000825616	42.789	0.869439
A0A087WRG0;A0A087WRM7;B2Z892;Q6GTL7;P70265	485;485;464;485;486	A0A087WRG0	A0A087WRG0	6-phosphofructo-2-kinase/fructose-2,6-bisphosphatase 2;6-phosphofructo-2-kinase;Fructose-2,6-bisphosphatase	Pfkfb2		0.998757	30.7339	5.96019e-05	69.763	66.436	61.703	0.971741	15.3683	0.000757805	48.616	0	0		NaN	0.989203	20.0406	0.00037757	45.257	0.998757	30.7339	0.000263641	61.703	0.990832	20.7011	8.74362e-05	60.564	0.998555	30.3779	5.96019e-05	69.763	0.992135	21.7012	0.000408489	53.059	0.994073	22.5469	8.74362e-05	60.564	0.994151	23.4583	0.000148235	54.225	0.991456
A0A087WRG0;A0A087WRM7;B2Z892;Q6GTL7;P70265	495;495;474;495;496	A0A087WRG0	A0A087WRG0	6-phosphofructo-2-kinase/fructose-2,6-bisphosphatase 2;6-phosphofructo-2-kinase;Fructose-2,6-bisphosphatase	Pfkfb2		1	44.3175	5.96019e-05	69.763	66.436	44.318	1	51.4453	0.000757805	51.445	1	44.3175	0.0653276	44.318	0.833848	6.9409	0.00220536	41.115	1	44.3175	0.000263641	61.703	0.887675	8.8983	0.000844697	47.814	0.981107	17.1513	5.96019e-05	69.763	1	51.4453	0.000408489	53.059	0	0		NaN	0.871928	8.30907	0.00036604	54.225	0.633032
Q62347;A0A087WRI6;Q01147-2;Q01147	88;128;128;142	Q62347	Q62347	Cyclic AMP-responsive element-binding protein 1	Creb1		0.893139	9.22101	3.43248e-06	79.633	72.745	79.633													0.627385	2.26274	0.000155613	62.891					0.889019	9.03661	3.3234e-05	70.412	0.5	0	0.00283322	42.209	0.5	0	5.22447e-05	68.83	0.893139	9.22101	3.43248e-06	79.633	0.5
Q62347;A0A087WRI6;Q01147-2;Q01147	89;129;129;143	Q62347	Q62347	Cyclic AMP-responsive element-binding protein 1	Creb1		0.5	0	5.22447e-05	68.83	58.778	42.209																									0.5	0	0.00283322	42.209	0.5	0	5.22447e-05	68.83					0.5
Q62347;A0A087WRI6;Q01147-2;Q01147	216;256;256;270	Q62347	Q62347	Cyclic AMP-responsive element-binding protein 1	Creb1		0.35213	0	3.00649e-12	51.568	39.372	42.353													0.342246	0	3.00649e-12	51.568	0.35213	0	3.32162e-06	42.353
Q62347;A0A087WRI6;Q01147-2;Q01147	217;257;257;271	Q62347	Q62347	Cyclic AMP-responsive element-binding protein 1	Creb1		0.35213	0	3.00649e-12	51.568	39.372	42.353													0.342246	0	3.00649e-12	51.568	0.35213	0	3.32162e-06	42.353
A0A087WRM8;A0A087WSS1;G3X9J4;E9QM90;Q148V7-3;Q148V7-2;Q148V7	180;180;180;180;148;180;180	A0A087WRM8	A0A087WRM8	LisH domain and HEAT repeat-containing protein KIAA1468	2310035C23Rik;Kiaa1468		0.999387	32.4114	3.48117e-15	96.464	84.671	77.527	0.99657	27.114	2.65575e-05	71.879	0.998604	29.1887	3.48117e-15	96.464	0.992155	22.2177	0.00014758	63.185	0.991129	20.0881	7.95964e-05	67.115	0.999387	32.4114	5.80455e-06	77.527	0.971703	16.0442	0.000324902	57.136	0.980441	19.0553	0.000245203	59.607	0.988149	22.1845	3.10644e-05	70.889	0.843084	9.91665	0.00128865	48.704	0.996294
A0A087WRM8;A0A087WSS1;G3X9J4;E9QM90;Q148V7-3;Q148V7-2;Q148V7	186;186;186;186;154;186;186	A0A087WRM8	A0A087WRM8	LisH domain and HEAT repeat-containing protein KIAA1468	2310035C23Rik;Kiaa1468		0.992543	20.8419	0.000384416	56.599	49.219	48.177	0	0		NaN					0.961403	14.133	0.0019176	46.408	0.992543	20.8419	0.000384416	56.599	0	0		NaN	0	0		NaN					0	0		NaN	0	0		NaN	0.722298
A0A087WRM8;A0A087WSS1;G3X9J4;E9QM90;Q148V7-3;Q148V7-2;Q148V7	170;170;170;170;138;170;170	A0A087WRM8	A0A087WRM8	LisH domain and HEAT repeat-containing protein KIAA1468	2310035C23Rik;Kiaa1468		0.797063	7.01515	0.00450409	41.401	32.868	41.401									0.797063	7.01515	0.00450409	41.401					0	0		NaN									0	0		NaN
A0A087WRM8;A0A087WSS1;G3X9J4;E9QM90;Q148V7-3;Q148V7-2;Q148V7	141;141;141;141;109;141;141	A0A087WRM8	A0A087WRM8	LisH domain and HEAT repeat-containing protein KIAA1468	2310035C23Rik;Kiaa1468		0.499923	0	1.11336e-05	45.434	40.451	45.434	0.499673	0	3.05897e-05	40.682	0	0		NaN																	0.499923	0	1.11336e-05	45.434					0	0		NaN
A0A087WSH6;A0A087WRN5;Q3UPL5	87;210;210	A0A087WSH6	A0A087WSH6	Uncharacterized protein C11orf96 homolog	Gm13889;Ag2		1	76.4253	4.87889e-07	104.82	81.448	104.82	0	0		NaN	0	0		NaN													0	0		NaN													1
A0A087WSH6;A0A087WRN5;Q3UPL5	94;217;217	A0A087WSH6	A0A087WSH6	Uncharacterized protein C11orf96 homolog	Gm13889;Ag2		0.499756	0	0.00204873	58.37	41.594	58.37	0.499021	0	0.0366885	46.844	0.493269	0	0.0124893	42.336	0	0		NaN	0	0		NaN									0	0		NaN
A0A087WRQ4;P63166	2;2	A0A087WRQ4	A0A087WRQ4	Small ubiquitin-related modifier 1	Sumo1		0.999998	59.5947	3.25661e-05	73.022	50.22	73.022	0.999725	38.6189	7.91668e-05	59.585					0.999945	45.6344	0.000145394	62.378									0	0		NaN					0.999921	44.0412	7.85424e-05	58.997	0	0		NaN	0.999998
A0A087WS46;O70251	65;106	A0A087WS46	A0A087WS46	Elongation factor 1-beta	Eef1b2;Eef1b		0.952472	13.019	2.2328e-16	61.532	53.54	61.532																									0.952472	13.019	2.2328e-16	61.532
A0A087WS46;O70251	41;82	A0A087WS46	A0A087WS46	Elongation factor 1-beta	Eef1b2;Eef1b		0.570746	1.23853	1.37913e-43	113.01	88.633	113.01	0.570746	1.23853	1.37913e-43	113.01	0.520485	0.707248	6.62293e-14	83.047					0	0		NaN													0.487554	0	1.30907e-42	110.07	0.496477	0	4.27977e-33	103.75
A0A087WS46;O70251	42;83	A0A087WS46	A0A087WS46	Elongation factor 1-beta	Eef1b2;Eef1b		0.987542	19.019	2.64787e-66	134.85	115.02	118.47									0.904673	9.81186	1.58222e-42	109.38	0.839523	7.59214	1.30817e-14	87.429	0.883566	8.81039	7.26025e-33	101.39	0.786145	6.35269	2.1562e-09	76.158	0.894036	9.26323	1.11798e-57	121.19	0.487554	0	1.30907e-42	110.07	0.496477	0	4.27977e-33	103.75	0.987542
A0A087WS46;O70251	49;90	A0A087WS46	A0A087WS46	Elongation factor 1-beta	Eef1b2;Eef1b		0.835257	10.1389	2.58321e-14	86.378	61.442	62.165					0.766422	6.32021	0.000247808	42.913	0.791947	8.81582	2.58321e-14	86.378	0	0		NaN	0.805917	8.91678	1.86542e-05	51.193	0.709064	6.8937	8.75944e-06	58.159	0.835257	10.1389	1.04033e-05	62.165	0.740293	7.79158	0.000436457	40.179	0.329042	0	0.00174697	43.024	0.377343
A0A087WSB1;Q8BH99;Q99M51	157;93;157	A0A087WSB1	A0A087WSB1	Cytoplasmic protein NCK1	Nck1		0.247852	0	2.04449e-08	44.267	38.948	44.267	0	0		NaN	0	0		NaN	0.247852	0	2.04449e-08	44.267					0	0		NaN	0	0		NaN					0	0		NaN	0	0		NaN
A0A087WSB1;Q8BH99;Q99M51	166;102;166	A0A087WSB1	A0A087WSB1	Cytoplasmic protein NCK1	Nck1		0.593732	5.81827	7.32741e-40	71.528	60.273	71.528	0	0		NaN	0	0		NaN	0.247852	0	2.04449e-08	44.267					0	0		NaN	0	0		NaN					0	0		NaN	0	0		NaN	0.593732
A0A087WSB1;Q8BH99;Q99M51;A0A087WQD1	85;21;85;85	A0A087WSB1	A0A087WSB1	Cytoplasmic protein NCK1	Nck1		0.929906	12.4478	1.53297e-12	65.155	58.357	65.155	0	0		NaN	0.929906	12.4478	1.53297e-12	65.155	0.864298	11.0532	1.21858e-10	61.109	0.702062	5.62921	1.25447e-05	48.337									0.588841	2.1332	2.84439e-05	45.332	0.807342	7.04656	1.49514e-10	60.521	0.88162	10.3855	2.6913e-07	55.049	0.771068
A0A087WSB1;Q8BH99;Q99M51;A0A087WQD1	91;27;91;91	A0A087WSB1	A0A087WSB1	Cytoplasmic protein NCK1	Nck1		0.439923	1.06084	1.10833e-12	65.784	56.965	65.784	0.409413	0.620665	1.99316e-07	55.67													0.359216	0	4.02947e-07	54.117																	0.439923
A0A087WSC0;Q8CIW6-2;Q8CIW6	43;728;751	A0A087WSC0	A0A087WSC0	Solute carrier family 26 member 6	Slc26a6		0.998331	28.4686	0.00202574	63.727	44.749	58.674	0.995771	24.1047	0.00319996	63.727	0.987081	20.4376	0.00265545	44.968	0.989688	20.3732	0.012189	53.751	0.988891	20.485	0.00572756	57.55	0	0		NaN	0	0		NaN	0.997052	25.6747	0.00526681	58.674	0.976053	16.9763	0.0397234	43.635	0	0		NaN	0.998331
Q0PCR6;C7TQ59;C7TQ57;A0A087WSE7	9;9;9;9	Q0PCR6	Q0PCR6		Cacna1c		0.289442	0	1.11486e-07	54.271	46.279	54.271													0.289442	0	1.11486e-07	54.271																	0	0		NaN
Q0PCR6;C7TQ59;C7TQ57;A0A087WSE7	17;17;17;17	Q0PCR6	Q0PCR6		Cacna1c		0.287161	0	7.05999e-17	63.697	50.129	63.697													0	0		NaN									0.287161	0	7.05999e-17	63.697	0.19495	0	6.20228e-06	46.404	0	0		NaN
Q0PCR6;C7TQ59;C7TQ57;A0A087WSE7	18;18;18;18	Q0PCR6	Q0PCR6		Cacna1c		0.287161	0	7.05999e-17	63.697	50.129	63.697													0	0		NaN									0.287161	0	7.05999e-17	63.697	0.19495	0	6.20228e-06	46.404	0	0		NaN
Q0PCR6;C7TQ59;C7TQ57;A0A087WSE7	20;20;20;20	Q0PCR6	Q0PCR6		Cacna1c		0.287161	0	2.17904e-17	67.832	51.432	63.697									0.255941	0	2.17904e-17	67.832	0	0		NaN									0.287161	0	7.05999e-17	63.697	0.19495	0	6.20228e-06	46.404	0	0		NaN
Q0PCR6;C7TQ59;C7TQ57;A0A087WSE7	21;21;21;21	Q0PCR6	Q0PCR6		Cacna1c		0.255941	0	2.17904e-17	67.832	51.432	67.832									0.255941	0	2.17904e-17	67.832	0	0		NaN													0.19495	0	6.20228e-06	46.404	0	0		NaN
Q0PCR6;C7TQ59;C7TQ57;A0A087WSE7;A0A087WQT9;F8WJL1;A0A087WR02;A0A087WPZ8;A0A087WS40;A0A087WQJ4;A0A087WRZ6;A0A087WS67;A0A087WPP1;A0A087WRM3;F7C376;Q01815-2;Q01815;A0A1W2P6T3;A0A1W2P805;A0A1W2P6Z7;A0A1W2P731;Q01815-3	1718;1718;1718;1743;1684;1688;1688;1688;1702;1705;1708;1713;1716;1736;1771;1677;1688;1518;1529;1554;1612;1418	Q0PCR6	Q0PCR6	Voltage-dependent L-type calcium channel subunit alpha-1C	Cacna1c		0.788135	5.70543	0.00430641	47.915	26.664	47.915					0	0		NaN	0.788135	5.70543	0.00430641	47.915					0	0		NaN	0	0		NaN	0	0		NaN	0	0		NaN	0	0		NaN
Q0PCR6;C7TQ59;C7TQ57;A0A087WSE7;A0A087WQT9;F8WJL1;A0A087WR02;A0A087WPZ8;A0A087WS40;A0A087WQJ4;A0A087WRZ6;A0A087WS67;A0A087WPP1;A0A087WRM3;F7C376;Q01815-2;Q01815;A0A1W2P6T3;A0A1W2P805;A0A1W2P6Z7;A0A1W2P731;Q01815-3	1721;1721;1721;1746;1687;1691;1691;1691;1705;1708;1711;1716;1719;1739;1774;1680;1691;1521;1532;1557;1615;1421	Q0PCR6	Q0PCR6	Voltage-dependent L-type calcium channel subunit alpha-1C	Cacna1c		0.99961	34.0877	8.52867e-06	71.08	64.352	70.281	0.943104	12.1947	8.52867e-06	71.08	0.99403	22.214	0.000155001	53.828	0.951557	12.932	0.000167604	53.169	0.994896	22.899	6.99873e-05	62.042	0.764624	5.11686	0.000167604	60.157	0.998455	28.1029	5.9158e-05	60.918	0.99961	34.0877	9.55649e-06	70.281	0	0		NaN	0	0		NaN	0.966364
Q0PCR6;C7TQ59;C7TQ57;A0A087WSE7;A0A087WQT9;F8WJL1;A0A087WR02;A0A087WPZ8;A0A087WS40;A0A087WQJ4;A0A087WRZ6;A0A087WS67;A0A087WPP1;A0A087WRM3;F7C376;Q01815-2;Q01815;A0A1W2P6T3;A0A1W2P805;A0A1W2P6Z7;A0A1W2P731;Q01815-3	1674;1674;1674;1699;1640;1644;1644;1644;1658;1661;1664;1669;1672;1692;1727;1633;1644;1474;1485;1510;1568;1374	Q0PCR6	Q0PCR6	Voltage-dependent L-type calcium channel subunit alpha-1C	Cacna1c		1	73.8812	2.33337e-10	99.5	82.967	73.881	1	99.4999	3.44808e-10	99.5	1	73.8812	0.000486121	73.881	1	63.0912	0.00345684	63.091	1	71.5575	0.000774755	71.558	1	42.976	0.0440039	42.976	1	95.2734	2.33337e-10	95.273	1	52.6925	0.0140306	52.693	1	79.492	0.000140252	79.492	1	89.4303	4.72404e-07	89.43
Q0PCR6;C7TQ59;C7TQ57;A0A087WSE7;A0A087WQT9;F8WJL1;A0A087WR02;A0A087WPZ8;A0A087WS40;A0A087WQJ4;A0A087WRZ6;A0A087WS67;A0A087WPP1;A0A087WRM3;F7C376;Q01815-2;Q01815	107;107;107;107;48;77;77;77;77;77;77;77;77;77;77;77;77	Q0PCR6	Q0PCR6	Voltage-dependent L-type calcium channel subunit alpha-1C	Cacna1c		0.723389	4.93907	8.10158e-73	142.39	128.3	142.39									0	0		NaN	0.365937	1.03222	2.59277e-08	58.015	0	0		NaN	0	0		NaN	0	0		NaN	0	0		NaN	0	0		NaN
Q0PCR6;C7TQ59;C7TQ57;A0A087WSE7;A0A087WQT9;F8WJL1;A0A087WR02;A0A087WPZ8;A0A087WS40;A0A087WQJ4;A0A087WRZ6;A0A087WS67;A0A087WPP1;A0A087WRM3;F7C376;Q01815-2;Q01815	108;108;108;108;49;78;78;78;78;78;78;78;78;78;78;78;78	Q0PCR6	Q0PCR6	Voltage-dependent L-type calcium channel subunit alpha-1C	Cacna1c		0.836439	7.79444	2.37334e-212	195.46	178.43	184.01	0.770977	6.20667	3.33546e-168	182.49					0.656278	4.68488	4.68973e-132	173.37	0.609084	3.65877	3.25159e-169	187.39	0.621909	3.88791	1.26413e-51	117.18	0.82573	7.4757	4.68973e-132	173.37	0.801587	6.87744	2.37334e-212	195.46	0.836439	7.79444	2.40256e-168	184.01	0.657411	4.60632	1.25041e-189	191.35	0.611984
Q0PCR6;C7TQ59;C7TQ57;A0A087WSE7;A0A087WQT9;F8WJL1;A0A087WR02;A0A087WPZ8;A0A087WS40;A0A087WQJ4;A0A087WRZ6;A0A087WS67;A0A087WPP1;A0A087WRM3;F7C376;Q01815-2;Q01815;A0A1W2P6T3;A0A1W2P805;A0A1W2P6Z7;A0A1W2P731;Q01815-3	1680;1680;1680;1705;1646;1650;1650;1650;1664;1667;1670;1675;1678;1698;1733;1639;1650;1480;1491;1516;1574;1380	Q0PCR6	Q0PCR6	Voltage-dependent L-type calcium channel subunit alpha-1C	Cacna1c		1	57.3483	0.00082971	66.595	47.353	57.348	1	66.5955	0.00082971	66.595	1	57.3483	0.00103466	57.348	0	0		NaN	1	50.3534	0.00329393	50.353					1	66.5955	0.00082971	66.595	1	66.5955	0.00082971	66.595	1	48.44	0.00417855	48.44	1	58.3699	0.00102872	58.37	0
Q0PCR6;C7TQ59;C7TQ57;A0A087WSE7;A0A087WQT9;F8WJL1;A0A087WR02;A0A087WPZ8;A0A087WS40;A0A087WQJ4;A0A087WRZ6;A0A087WS67;A0A087WPP1;A0A087WRM3;F7C376;Q01815-2;Q01815;A0A1W2P6T3;A0A1W2P805;A0A1W2P6Z7;A0A1W2P731;Q01815-3	1700;1700;1700;1725;1666;1670;1670;1670;1684;1687;1690;1695;1698;1718;1753;1659;1670;1500;1511;1536;1594;1400	Q0PCR6	Q0PCR6	Voltage-dependent L-type calcium channel subunit alpha-1C	Cacna1c		0.995216	23.1809	5.60502e-07	79.022	55.171	79.022	0	0		NaN	0	0		NaN	0	0		NaN	0	0		NaN					0	0		NaN	0.990485	20.1742	0.00166114	50.155	0	0		NaN	0	0		NaN	0.995216
Q0PCR6;C7TQ59;C7TQ57;A0A087WSE7;A0A087WQT9;F8WJL1;A0A087WR02;A0A087WPZ8;A0A087WS40;A0A087WQJ4;A0A087WRZ6;A0A087WS67;A0A087WPP1;A0A087WRM3;F7C376;Q01815-2;Q01815;A0A1W2P6T3;A0A1W2P805;A0A1W2P6Z7;A0A1W2P731;Q01815-3	1927;1927;1927;1952;1893;1897;1897;1897;1911;1914;1917;1922;1925;1945;1980;1886;1897;1727;1738;1763;1821;1627	Q0PCR6	Q0PCR6	Voltage-dependent L-type calcium channel subunit alpha-1C	Cacna1c		1	43.3373	0.000214627	67.234	57.046	43.337					1	43.3373	0.00213904	43.337									0	0		NaN									1	42.7845	0.00230773	42.785	0	0		NaN	1
Q0PCR6;C7TQ59;C7TQ57;A0A087WSE7;A0A087WQT9;F8WJL1;A0A087WR02;A0A087WPZ8;A0A087WS40;A0A087WQJ4;A0A087WRZ6;A0A087WS67;A0A087WPP1;A0A087WRM3;F7C376;Q01815-2;Q01815;A0A1W2P6T3;A0A1W2P805;A0A1W2P6Z7;A0A1W2P731;Q01815-3	845;845;845;870;811;815;815;815;840;815;815;840;815;815;840;815;815;656;656;681;681;576	Q0PCR6	Q0PCR6	Voltage-dependent L-type calcium channel subunit alpha-1C	Cacna1c		0.697715	5.91933	0.000194761	62.042	41.615	62.042													0	0		NaN	0	0		NaN					0.630444	5.41783	0.00458174	41.227									0.697715
A0A087WSU2;Q8K310	195;195	A0A087WSU2	A0A087WSU2	Matrin-3	Matr3		0.576964	1.34792	2.00886e-14	70.569	67.232	64.377					0.576964	1.34792	1.42638e-12	64.377					0	0		NaN	0	0		NaN	0	0		NaN					0	0		NaN	0.5	0	2.00886e-14	70.569	0
A0A087WSU2;Q8K310	206;206	A0A087WSU2	A0A087WSU2	Matrin-3	Matr3		0.998602	30.7669	0.000445563	41.554	28.677	41.554													0	0		NaN	0	0		NaN	0	0		NaN					0.998602	30.7669	0.000445563	41.554					0
A0A087WSU2;Q8K310	188;188	A0A087WSU2	A0A087WSU2	Matrin-3	Matr3		0.999788	36.7303	7.96108e-40	96.679	89.146	82.342	0.997139	25.4522	7.96108e-40	96.679	0.997054	25.3102	1.99875e-12	63.697	0.999788	36.7303	2.78186e-23	82.342	0.999389	32.1781	1.00986e-12	66.793	0.977893	16.4598	4.22144e-24	87.339	0.997963	26.9041	1.8693e-14	71.974	0.950835	12.8732	5.50517e-13	68.231	0.998486	28.1939	1.72481e-18	80.359	0.997319	25.7881	2.00886e-14	70.569	0.983973
E9PZ64;A0A087WSU4;Q61122	179;179;179	E9PZ64	E9PZ64	NGFI-A-binding protein 1	Nab1		0.498132	0	1.63688e-05	42.659	38.107	42.659													0	0		NaN	0	0		NaN
E9PZ64;A0A087WSU4;Q61122	182;182;182	E9PZ64	E9PZ64	NGFI-A-binding protein 1	Nab1		0.966779	14.6432	7.36532e-10	55.442	44.355	55.442													0	0		NaN	0	0		NaN					0.620073	2.13146	6.83276e-06	44.385	0.792343	5.81663	1.4363e-09	53.545	0.963036	14.1659	1.60355e-09	53.091
A0A0A0MQ73;Q6PDK2	4789;4789	A0A0A0MQ73	A0A0A0MQ73	Histone-lysine N-methyltransferase;Histone-lysine N-methyltransferase 2D	Kmt2d		1	82.1708	4.16935e-08	91.549	84.329	82.171	1	82.1708	1.22376e-05	82.171	1	82.1708	1.22376e-05	82.171	1	90.6531	5.34654e-08	90.653	1	83.3966	9.763e-06	83.397	1	79.659	2.01186e-05	79.659	1	78.6526	2.32762e-05	78.653	1	73.7813	7.33738e-05	73.781	1	77.0624	2.82653e-05	77.062	1	72.2004	0.000102276	72.2	1
A0A0A0MQ73;Q6PDK2	2299;2299	A0A0A0MQ73	A0A0A0MQ73	Histone-lysine N-methyltransferase;Histone-lysine N-methyltransferase 2D	Kmt2d		0.999991	50.3967	5.25799e-05	68.809	58.805	68.809	0.999771	36.4015	0.000754812	51.092					0.995011	22.9984	0.00283322	42.209	0.999954	43.3848	0.000294407	57.804	0.995011	22.9984	0.00283322	42.209	0.999724	35.5932	0.000935503	50.284	0.998763	29.0707	0.00243503	43.761	0.999991	50.3967	5.25799e-05	68.809	0.999771	36.4015	0.000754812	51.092	0.999608
A0A0A0MQ73;Q6PDK2	1627;1627	A0A0A0MQ73	A0A0A0MQ73	Histone-lysine N-methyltransferase;Histone-lysine N-methyltransferase 2D	Kmt2d		1	56.5691	2.02767e-06	56.569	26.634	56.569	0	0		NaN	0.939045	14.887	2.02767e-06	50.827	0	0		NaN	0	0		NaN	0	0		NaN	0	0		NaN	0	0		NaN	0	0		NaN	0	0		NaN	1
A0A0A0MQ73;Q6PDK2	2597;2597	A0A0A0MQ73	A0A0A0MQ73	Histone-lysine N-methyltransferase;Histone-lysine N-methyltransferase 2D	Kmt2d		0.8776	8.55515	0.000728796	78.655	44.695	78.655	0.801979	6.07453	0.00182721	65.5	0.841595	7.25335	0.00205399	58.699	0	0		NaN	0	0		NaN	0	0		NaN	0	0		NaN	0	0		NaN	0	0		NaN	0.8776	8.55515	0.000728796	78.655	0
S4R294;S4R2J9;A0A0A0MQ79;Q3TLH4-5;Q3TLH4;S4R2L9;S4R209	1516;1514;1514;1516;1516;90;232	S4R294	S4R294	Protein PRRC2C	Prrc2c		0.955432	14.1061	0.00243364	51.286	28.06	51.286					0	0		NaN	0.955432	14.1061	0.00243364	51.286	0	0		NaN	0	0		NaN	0	0		NaN	0	0		NaN	0.819008	7.31786	0.0354062	44.299	0	0		NaN	0
S4R294;S4R2J9;A0A0A0MQ79;Q3TLH4-5;Q3TLH4	853;851;851;853;853	S4R294	S4R294	Protein PRRC2C	Prrc2c		1	73.2332	0.0296608	73.233	51.785	73.233																	0	0		NaN	0	0		NaN	1	73.2332	0.0296608	73.233	0	0		NaN	0	0		NaN
S4R294;S4R2J9;A0A0A0MQ79;Q3TLH4-5;Q3TLH4;S4R2L9;S4R209	1933;1931;1931;1933;1933;507;649	S4R294	S4R294	Protein PRRC2C	Prrc2c		0.452245	0	5.7815e-18	84.181	61.279	84.181	0.414777	0	2.92158e-08	59.324	0.237338	0	1.59807e-05	45.395	0.292071	0	1.0272e-08	67.76	0.452245	0	5.7815e-18	84.181	0.275384	0	2.88629e-08	60.735					0.303923	0	7.71554e-08	56.247	0.318103	0	5.04673e-05	41.446	0.301029	0	2.92158e-08	59.324	0.226171
S4R294;S4R2J9;A0A0A0MQ79;Q3TLH4-5;Q3TLH4;S4R2L9;S4R209	1935;1933;1933;1935;1935;509;651	S4R294	S4R294	Protein PRRC2C	Prrc2c		0.452245	0	5.7815e-18	84.181	61.279	84.181	0.414777	0	2.92158e-08	59.324	0.237338	0	1.59807e-05	45.395	0.292071	0	1.0272e-08	67.76	0.452245	0	5.7815e-18	84.181	0.275384	0	2.88629e-08	60.735					0.303923	0	7.71554e-08	56.247	0.318103	0	5.04673e-05	41.446	0.301029	0	2.92158e-08	59.324	0.226171
S4R294;S4R2J9;A0A0A0MQ79;Q3TLH4-5;Q3TLH4;S4R2L9;S4R209	1938;1936;1936;1938;1938;512;654	S4R294	S4R294	Protein PRRC2C	Prrc2c		0.303923	0	1.0272e-08	67.76	45.385	56.247					0.237338	0	1.59807e-05	45.395	0.292071	0	1.0272e-08	67.76					0.275384	0	2.88629e-08	60.735					0.303923	0	7.71554e-08	56.247					0.301029	0	2.92158e-08	59.324	0.226171
S4R2C4;A0A0A0MQ87;Q02384	1283;1315;1316	S4R2C4	S4R2C4	Son of sevenless homolog 2	Sos2		0.999728	35.6542	0.00251801	42.095	33.366	42.095					0.999728	35.6542	0.00251801	42.095
A0A0A0MQ88;Q8K4R4	276;299	A0A0A0MQ88	A0A0A0MQ88	Cytoplasmic phosphatidylinositol transfer protein 1	Pitpnc1		0.999985	48.1574	2.87922e-30	134.98	108.3	133.71	0.999835	37.8362	1.08448e-08	90.412	0.999856	38.4116	3.35102e-14	100.55	0.999916	40.7479	5.46599e-22	117.93	0.996118	24.8666	0.000362398	58.752	0.999851	38.2909	3.37255e-05	77.078	0.999985	48.1574	4.00321e-30	133.71	0.999961	44.0505	2.87922e-30	134.98	0.995542	23.6701	0.000643381	55.196	0.993978	22.5468	0.000429808	57.434	0.999848
S4R203;S4R248;A0A0A0MQ95;B2RUJ8;S4R221;Q8C0D4;S4R1B0	238;238;238;238;238;238;238	S4R203	S4R203	Rho GTPase-activating protein 12	Arhgap12		0.976099	16.2785	4.77356e-05	42.639	34.647	42.639													0	0		NaN	0	0		NaN					0.976099	16.2785	4.77356e-05	42.639	0	0		NaN	0	0		NaN
S4R203;S4R248;A0A0A0MQ95;B2RUJ8;S4R221;Q8C0D4;S4R1B0;S4R2V0	211;211;211;211;211;211;211;84	S4R203	S4R203	Rho GTPase-activating protein 12	Arhgap12		0.490827	0	2.08523e-09	69.716	60.895	69.716	0.490827	0	2.08523e-09	69.716	0	0		NaN	0	0		NaN	0	0		NaN	0.488915	0	3.54336e-08	57.679	0	0		NaN	0.471512	0	2.08523e-09	69.716					0	0		NaN	0
S4R203;S4R248;A0A0A0MQ95;B2RUJ8;S4R221;Q8C0D4;S4R1B0;S4R2V0	213;213;213;213;213;213;213;86	S4R203	S4R203	Rho GTPase-activating protein 12	Arhgap12		0.490827	0	2.08523e-09	69.716	60.895	69.716	0.490827	0	2.08523e-09	69.716	0	0		NaN	0	0		NaN	0	0		NaN	0.488915	0	3.54336e-08	57.679	0	0		NaN	0.471512	0	2.08523e-09	69.716					0	0		NaN	0
S4R203;S4R248;A0A0A0MQ95;B2RUJ8;S4R221;Q8C0D4	512;537;542;559;589;584	S4R203	S4R203	Rho GTPase-activating protein 12	Arhgap12		0.993144	21.7541	2.0577e-08	47.749	36.644	47.749													0.993144	21.7541	2.0577e-08	47.749
Q8K3D3-2;A0A0A0MQ99;V9GXX7	26;36;32	Q8K3D3-2	Q8K3D3-2		Swi5		0.999998	56.4444	1.01778e-71	92.632	83.331	80.721	0.999916	41.7186	6.02058e-22	59.873	0.999998	56.4444	1.47934e-25	80.721	0.999992	51.3774	1.01778e-71	92.632	0.465298	0.374167	7.90821e-22	58.688	0.407528	0.373332	5.86404e-22	59.971	0.452617	0.29605	2.7715e-07	41.133	0	0		NaN	0.997748	26.8148	8.00331e-06	44.916	0.519298	0.449331	5.36876e-50	76.611
A0A0A0MQA5;P68368;P05213	369;340;340	A0A0A0MQA5;P05213	P05213	Tubulin alpha-4A chain;Tubulin alpha-1B chain	Tuba4a;Tuba1b		0.999997	55.5098	0.00119788	60.401	41.572	60.401																									0	0		NaN	0	0		NaN					0
A0A0A0MQC2;B1AS67;Q66T02-2;Q66T02	227;246;259;259	A0A0A0MQC2	A0A0A0MQC2	Pleckstrin homology domain-containing family G member 5	Plekhg5		0.901197	9.60052	0.000791785	63.283	37.897	63.283					0	0		NaN	0	0		NaN	0	0		NaN	0	0		NaN	0	0		NaN	0	0		NaN					0	0		NaN	0.901197
A0A0A0MQC2;B1AS67;Q66T02-2;Q66T02	904;923;936;936	A0A0A0MQC2	A0A0A0MQC2	Pleckstrin homology domain-containing family G member 5	Plekhg5		0.494912	0.772942	5.36912e-05	45.784	40.356	45.784													0.494912	0.772942	5.36912e-05	45.784	0	0		NaN																	0
A0A0A0MQC2;B1AS67;Q66T02-2;Q66T02	906;925;938;938	A0A0A0MQC2	A0A0A0MQC2	Pleckstrin homology domain-containing family G member 5	Plekhg5		0.476693	0	4.7295e-06	65.454	55.115	41.052	0.423333	0	3.68016e-05	47.916	0.476693	0	4.7295e-06	65.454									0	0		NaN																	0.444077
A0A0A0MQC2;B1AS67;Q66T02-2;Q66T02	909;928;941;941	A0A0A0MQC2	A0A0A0MQC2	Pleckstrin homology domain-containing family G member 5	Plekhg5		0.476693	0	4.7295e-06	65.454	55.115	41.052	0.423333	0	3.68016e-05	47.916	0.476693	0	4.7295e-06	65.454									0	0		NaN																	0.444077
A0A0A0MQC2;B1AS67;Q66T02-2;Q66T02	930;949;962;962	A0A0A0MQC2	A0A0A0MQC2	Pleckstrin homology domain-containing family G member 5	Plekhg5		0.499427	0	0.00150394	40.552	33.823	40.552	0	0		NaN	0	0		NaN									0	0		NaN					0	0		NaN					0.499427	0	0.00150394	40.552
A0A0A0MQC2;B1AS67;Q66T02-2;Q66T02	932;951;964;964	A0A0A0MQC2	A0A0A0MQC2	Pleckstrin homology domain-containing family G member 5	Plekhg5		0.925313	10.9692	5.32494e-19	96.591	81.619	55.426	0	0		NaN	0	0		NaN	0.925313	10.9692	0.000329245	55.426					0	0		NaN					0	0		NaN	0.848319	7.52169	0.000963555	45.115	0.499427	0	0.00150394	40.552	0.911429
A0A0A0MQC7;A2A5Y6;P10637;P10637-2;P10637-4;P10637-6;P10637-3;P10637-5;B1AQW2	688;704;688;385;296;305;296;327;345	A0A0A0MQC7;B1AQW2	A0A0A0MQC7	Microtubule-associated protein;Microtubule-associated protein tau	Mapt		0.998252	28.9219	4.6991e-20	72.228	63.296	72.228	0.99299	23.7498	3.60432e-06	54.605	0.967085	15.4838	6.43675e-07	56.936	0.983976	21.0997	6.8878e-07	56.9	0.997686	27.444	2.03831e-16	67.641	0.973234	14.3736	3.786e-05	48.759	0.991685	21.2986	1.41944e-09	59.536	0.92327	11.9994	2.34591e-05	48.112	0.998252	28.9219	4.6991e-20	72.228	0.989657	22.1193	9.04941e-14	71.742	0.983082
A0A0A0MQC7;A2A5Y6;P10637;P10637-2;P10637-4;P10637-6;P10637-3;P10637-5;B1AQW2	692;708;692;389;300;309;300;331;349	A0A0A0MQC7;B1AQW2	A0A0A0MQC7	Microtubule-associated protein;Microtubule-associated protein tau	Mapt		0.963362	13.2932	9.04941e-14	71.742	63.831	57.804	0.934202	9.16629	3.60432e-06	54.605	0.923854	8.30486	7.97068e-07	55.007	0.897426	6.5032	6.8878e-07	69.451	0.957195	11.3244	2.78582e-09	59.661	0.960323	11.8356	9.66554e-05	48.759	0.954342	10.4486	1.41944e-09	59.536	0.950957	12.924	2.34591e-05	48.112	0.963362	13.2932	1.04752e-09	57.804	0.842555	4.47839	9.04941e-14	71.742	0.916241
A0A0A0MQC7;A2A5Y6;P10637;P10637-2;P10637-4;P10637-6;P10637-3;P10637-5;B1AQW2	696;712;696;393;304;313;304;335;353	A0A0A0MQC7;B1AQW2	A0A0A0MQC7	Microtubule-associated protein;Microtubule-associated protein tau	Mapt		0.753159	0.694681	1.04752e-09	79.82	53.436	47.397	0	0		NaN	0.699044	0.787082	6.43675e-07	56.936	0.70475	0.381905	6.8878e-07	56.9	0.683929	0	1.59966e-06	77.597	0	0		NaN	0.753159	0.694681	1.82223e-06	69.451	0.744759	0	2.34591e-05	66.621	0.498267	0	1.04752e-09	70.488	0.481903	0	0.000971706	70.488	0.495155
A0A0A0MQC7;A2A5Y6;P10637	288;304;288	A0A0A0MQC7	A0A0A0MQC7	Microtubule-associated protein;Microtubule-associated protein tau	Mapt		0.533359	0.580972	1.24863e-24	79.568	66.905	79.568	0.533359	0.580972	1.24863e-24	79.568	0.499476	0	1.80193e-05	46.982	0.499498	0	2.13575e-05	46.178	0.499896	0	4.36293e-11	60.278	0.499351	0	3.4144e-07	52.061	0.499885	0	2.32387e-07	53.779					0.499978	0	9.70871e-17	67.413	0.499986	0	1.85529e-17	69.398	0.499591
A0A0A0MQC7;A2A5Y6;P10637;P10637-2;P10637-4;P10637-6;P10637-3;P10637-5;B1AQW2	701;717;701;398;309;318;309;340;358	A0A0A0MQC7;B1AQW2	A0A0A0MQC7	Microtubule-associated protein;Microtubule-associated protein tau	Mapt		0.848107	6.40046	2.79022e-38	74.404	69.245	52.237									0.848107	6.40046	8.41958e-14	52.237	0	0		NaN					0.814745	6.44015	3.6133e-20	57.919									0.549081	0.855854	2.79022e-38	74.404	0
A0A0A0MQC7;A2A5Y6;P10637;P10637-2;P10637-4;P10637-6;P10637-3;P10637-5;B1AQW2	704;720;704;401;312;321;312;343;361	A0A0A0MQC7;B1AQW2	A0A0A0MQC7	Microtubule-associated protein;Microtubule-associated protein tau	Mapt		0.564596	0	2.79022e-38	74.404	69.245	64.633	0.434128	0	2.02301e-21	58.498	0.442697	0	1.59134e-21	59.598	0.502947	0	8.41958e-14	52.237	0	0		NaN	0.564596	0	2.24834e-29	64.633	0.436784	0	3.6133e-20	57.919					0.37836	0	4.88348e-11	48.947	0.490114	0	2.79022e-38	74.404	0.401513
A0A0A0MQC7;A2A5Y6;P10637;P10637-2;P10637-4;P10637-6;P10637-3;P10637-5;B1AQW2	705;721;705;402;313;322;313;344;362	A0A0A0MQC7;B1AQW2	A0A0A0MQC7	Microtubule-associated protein;Microtubule-associated protein tau	Mapt		0.583141	1.20888	2.75773e-62	87.753	83.064	87.753	0.434128	0	2.02301e-21	58.498	0.442697	0	1.59134e-21	59.598	0.502947	0	8.41958e-14	52.237	0.583141	1.20888	2.75773e-62	87.753	0.564596	0	2.24834e-29	64.633	0.436784	0	3.6133e-20	57.919					0.37836	0	4.88348e-11	48.947	0.490114	0	2.79022e-38	74.404	0.36386
A0A0A0MQC7;A2A5Y6;P10637;P10637-2;P10637-4;P10637-6;P10637-3;P10637-5;B1AQW2	708;724;708;405;316;325;316;347;365	A0A0A0MQC7;B1AQW2	A0A0A0MQC7	Microtubule-associated protein;Microtubule-associated protein tau	Mapt		0.864	7.32252	2.75773e-62	87.753	83.064	87.753	0.434128	0	2.02301e-21	58.498	0.442697	0	1.59134e-21	59.598	0.502947	0	8.41958e-14	52.237	0.864	7.32252	2.75773e-62	87.753	0.564596	0	2.24834e-29	64.633	0.436784	0	3.6133e-20	57.919					0.37836	0	4.88348e-11	48.947	0.490114	0	2.79022e-38	74.404	0.36386
A0A0A0MQC7;A2A5Y6;P10637;P10637-2;P10637-4;P10637-6;P10637-3;P10637-5;B1AQW2	714;730;714;411;322;331;322;353;371	A0A0A0MQC7;B1AQW2	A0A0A0MQC7	Microtubule-associated protein;Microtubule-associated protein tau	Mapt		0.664719	5.95657	2.79022e-38	74.404	69.245	59.048	0.664719	5.95657	4.15706e-22	59.048					0.338902	0	7.47746e-07	40.764	0	0		NaN	0.564596	0	2.24834e-29	64.633	0.436784	0	3.6133e-20	57.919					0.37836	0	1.39462e-10	48.947	0.490114	0	2.79022e-38	74.404	0.36386
A0A0A0MQC7;A2A5Y6;P10637;P10637-2;P10637-4;P10637-6;P10637-3;P10637-5;B1AQW2	648;664;648;345;256;265;256;287;305	A0A0A0MQC7;B1AQW2	A0A0A0MQC7	Microtubule-associated protein;Microtubule-associated protein tau	Mapt		0.998907	29.6088	0.000125724	62.055	45.03	56.872	0.984869	18.1351	0.000937186	41.967					0.976268	16.1423	0.000415465	47.532	0.983688	17.8035	0.000125724	62.055					0	0		NaN					0.998627	28.618	0.000477818	46.319					0.845629
A0A0A0MQC7;A2A5Y6;P10637	188;204;188	A0A0A0MQC7	A0A0A0MQC7	Microtubule-associated protein;Microtubule-associated protein tau	Mapt		0.984288	22.993	1.65891e-18	58.49	42.089	57.832	0.984288	22.993	1.87027e-18	57.832	0.918545	16.1749	7.07604e-09	46.034	0.819905	11.1167	4.01471e-13	54.011	0.372691	2.87583	3.92675e-08	44.915	0.731512	9.53492	1.2623e-07	44.641	0.342912	0.55253	2.95654e-07	44.107	0.781436	9.53945	3.92675e-08	44.915	0.914493	15.3317	1.76501e-18	58.16	0.729647	9.53492	1.2623e-07	44.641	0.619375
A0A0A0MQC7;A2A5Y6;P10637;P10637-2;P10637-4;P10637-6;P10637-3;P10637-5;B1AQW2	487;503;487;184;126;104;126;126;144	A0A0A0MQC7;B1AQW2	A0A0A0MQC7	Microtubule-associated protein;Microtubule-associated protein tau	Mapt		0.544004	0.919172	0.000921382	46.352	38.132	46.352					0	0		NaN	0	0		NaN	0	0		NaN	0	0		NaN	0	0		NaN	0	0		NaN	0	0		NaN	0	0		NaN
A0A0A0MQC7;A2A5Y6;P10637;P10637-2;P10637-4;P10637-6;P10637-3;P10637-5;B1AQW2	490;506;490;187;129;107;129;129;147	A0A0A0MQC7;B1AQW2	A0A0A0MQC7	Microtubule-associated protein;Microtubule-associated protein tau	Mapt		0.501634	0	0.000921382	46.352	38.132	46.352					0	0		NaN	0	0		NaN	0	0		NaN	0	0		NaN	0	0		NaN	0	0		NaN	0	0		NaN	0	0		NaN	0.441256
A0A0A0MQC7;A2A5Y6;P10637;P10637-2;P10637-4;P10637-6;P10637-3;P10637-5;B1AQW2	491;507;491;188;130;108;130;130;148	A0A0A0MQC7;B1AQW2	A0A0A0MQC7	Microtubule-associated protein;Microtubule-associated protein tau	Mapt		0.896956	10.6173	1.4112e-07	79.875	73.215	79.875	0.473847	0.475446	0.0040721	42.813	0	0		NaN	0	0		NaN	0	0		NaN	0.584748	1.69532	0.000259382	58.831	0.896956	10.6173	1.4112e-07	79.875	0.808616	7.24111	0.00030355	56.139	0	0		NaN	0	0		NaN	0.441256
A0A0A0MQC7;A2A5Y6;P10637;P10637-2;P10637-4;P10637-6;P10637-3;P10637-5;B1AQW2	494;510;494;191;133;111;133;133;151	A0A0A0MQC7;B1AQW2	A0A0A0MQC7	Microtubule-associated protein;Microtubule-associated protein tau	Mapt		0.974476	15.8496	2.38402e-35	111.83	99.617	111.83	0.9408	13.38	1.31922e-05	74.789	0.7698	5.93848	1.33963e-05	74.769	0.825746	6.88722	5.47681e-10	82.651	0.786994	7.22827	0.000257933	58.071	0	0		NaN	0	0		NaN	0	0		NaN	0.898781	11.1251	5.70938e-05	70.373	0.974476	15.8496	2.38402e-35	111.83	0.973819
A0A0A0MQC7;A2A5Y6;P10637;P10637-2;P10637-4;P10637-6;P10637-3;P10637-5;B1AQW2	502;518;502;199;141;119;141;141;159	A0A0A0MQC7;B1AQW2	A0A0A0MQC7	Microtubule-associated protein;Microtubule-associated protein tau	Mapt		0.946651	12.4691	3.37936e-05	77.42	70.05	49.482	0.582298	1.44779	0.00679507	54.7	0.753591	5.22162	4.21662e-05	69.261	0.860015	8.15918	4.22724e-05	77.42	0.946651	12.4691	0.000111737	65.374	0.818742	6.79224	0.000190568	62.377	0.604349	2.10394	4.22724e-05	77.42	0	0		NaN	0.482751	0	0.00104185	40.844	0	0		NaN	0.569422
A0A0A0MQC7;A2A5Y6;P10637;P10637-2;P10637-4;P10637-6;P10637-3;P10637-5;B1AQW2	506;522;506;203;145;123;145;145;163	A0A0A0MQC7;B1AQW2	A0A0A0MQC7	Microtubule-associated protein;Microtubule-associated protein tau	Mapt		0.999794	36.9772	1.49941e-09	91.914	67.69	85.958	0.99955	33.6145	1.24937e-06	78.692	0.999184	30.9004	1.59777e-06	77.744	0.999794	36.9772	1.49941e-09	91.914	0.999582	34.4969	2.84501e-09	83.862	0.998949	32.9332	1.10164e-05	74.46	0.998577	28.5286	7.7818e-07	79.974	0.99336	22.952	0.000110316	82.362	0.997407	25.869	3.77261e-09	82.417	0.9972	25.5407	4.72925e-06	74.841	0.997564
A0A0A0MQC7;A2A5Y6;P10637;P10637-2	57;57;57;57	A0A0A0MQC7	A0A0A0MQC7	Microtubule-associated protein;Microtubule-associated protein tau	Mapt		0.472506	0	0.000123266	61.265	43.464	44.196	0.44456	0	0.0333851	45.723	0.456619	0	0.0342213	45.33	0	0		NaN	0	0		NaN	0.441135	0	0.000123266	60.549	0.331947	0	0.0499397	40.577													0.438258
A0A0A0MQC7;A2A5Y6;P10637;P10637-2;P10637-4;P10637-6;P10637-3;P10637-5;B1AQW2	527;543;527;224;166;144;166;166;184	A0A0A0MQC7;B1AQW2	A0A0A0MQC7	Microtubule-associated protein;Microtubule-associated protein tau	Mapt		0.97229	16.3839	0.000860047	73.156	47.835	72.898	0	0		NaN					0.87892	9.38463	0.0309091	44.294	0.97229	16.3839	0.000935173	72.898	0.888244	9.73448	0.0142281	51.147	0	0		NaN	0	0		NaN	0	0		NaN	0.868533	8.82403	0.013472	51.771	0.925791
A0A0A0MQD5;Q4ACU6;Q4ACU6-3;Q4ACU6-6	557;482;74;74	A0A0A0MQD5	A0A0A0MQD5	SH3 and multiple ankyrin repeat domains protein 3	Shank3		1	75.0178	1.24089e-37	130.39	118.23	75.018	1	87.2873	2.76403e-08	87.287	1	75.0178	3.94895e-06	75.018	1	84.5663	8.90058e-08	84.566	1	108.489	2.02505e-26	108.49	1	84.035	1.00987e-07	84.035	1	85.6194	6.52554e-08	85.619	1	108.997	1.81395e-26	109	1	83.9663	1.02536e-07	83.966	1	58.6706	8.71471e-05	58.671	1
A0A0A0MQD5;Q4ACU6;Q4ACU6-3;Q4ACU6-9;Q4ACU6-8;Q4ACU6-7;Q4ACU6-11;Q4ACU6-12;Q4ACU6-10	1203;1128;720;510;551;596;600;238;502	A0A0A0MQD5;Q4ACU6-10	A0A0A0MQD5	SH3 and multiple ankyrin repeat domains protein 3	Shank3		0.517887	0.302164	2.78936e-05	43.799	36.353	43.799	0	0		NaN	0.517887	0.302164	2.78936e-05	43.799	0	0		NaN	0	0		NaN					0	0		NaN	0	0		NaN									0
A0A0A0MQD5;Q4ACU6;Q4ACU6-3;Q4ACU6-9;Q4ACU6-8;Q4ACU6-7;Q4ACU6-11;Q4ACU6-12;Q4ACU6-10	1209;1134;726;516;557;602;606;244;508	A0A0A0MQD5;Q4ACU6-10	A0A0A0MQD5	SH3 and multiple ankyrin repeat domains protein 3	Shank3		0.99999	50.9593	1.90547e-86	119.32	111.96	119.32	0.999848	38.2475	4.32005e-38	91.722	0.996604	24.4206	2.2826e-07	53.844	0.999905	43.8707	1.19873e-20	73.805	0.999082	32.0548	6.69081e-11	58.477	0.99999	50.9593	1.90547e-86	119.32	0.999043	31.5771	6.69081e-11	58.477	0.999588	33.9537	1.74735e-20	74.207	0.998296	30.1213	9.71573e-30	66.933	0.999188	30.9052	3.5238e-38	92.275	0
A0A0A0MQD5;Q4ACU6	462;387	A0A0A0MQD5	A0A0A0MQD5	SH3 and multiple ankyrin repeat domains protein 3	Shank3		0.994212	22.3493	7.5117e-07	77.776	53.746	68.83	0.987296	18.9051	2.39847e-05	63.037	0.990438	20.1529	3.19221e-05	71.879	0.989136	19.5928	0.00010655	64.104	0.976073	16.1059	0.00159874	49.31	0.967507	14.7386	2.57705e-05	66.285	0.990841	20.3414	3.00296e-05	77.776	0.993528	21.8615	7.5117e-07	76.759	0.983743	17.8184	7.70157e-05	66.285	0.994212	22.3493	4.25546e-05	68.83	0.993819
A0A0A0MQD5;Q4ACU6	511;436	A0A0A0MQD5	A0A0A0MQD5	SH3 and multiple ankyrin repeat domains protein 3	Shank3		0.346133	0	1.39993e-08	44.641	33.934	44.641	0.346133	0	1.39993e-08	44.641					0	0		NaN	0	0		NaN	0	0		NaN									0	0		NaN	0	0		NaN
A0A0A0MQD5;Q4ACU6	516;441	A0A0A0MQD5	A0A0A0MQD5	SH3 and multiple ankyrin repeat domains protein 3	Shank3		0.346133	0	1.39993e-08	44.641	33.934	44.641	0.346133	0	1.39993e-08	44.641					0	0		NaN	0	0		NaN	0	0		NaN									0	0		NaN	0	0		NaN
A0A0A0MQD5;Q4ACU6;Q4ACU6-3;Q4ACU6-9;Q4ACU6-8;Q4ACU6-7;Q4ACU6-11;Q4ACU6-12;Q4ACU6-10	1234;1159;751;541;582;627;631;269;533	A0A0A0MQD5;Q4ACU6-10	A0A0A0MQD5	SH3 and multiple ankyrin repeat domains protein 3	Shank3		0.99984	37.9606	3.80543e-11	96.64	55.926	90.653	0.99958	33.7633	3.80543e-11	96.229	0.956403	13.4119	3.61119e-05	75.819	0.967404	14.7244	0.00206505	52.693	0.997771	26.5088	3.80543e-11	96.229	0.999426	32.4074	0.000114074	71.555	0.984215	17.9484	3.96495e-11	96.64	0.995301	23.2598	0.000550015	62.408	0.997249	25.5937	5.2114e-05	74.944	0.983423	17.7322	1.22376e-05	82.171	0.5
A0A0A0MQD5;Q4ACU6;Q4ACU6-3;Q4ACU6-9;Q4ACU6-8;Q4ACU6-7;Q4ACU6-11;Q4ACU6-12;Q4ACU6-10	1238;1163;755;545;586;631;635;273;537	A0A0A0MQD5;Q4ACU6-10	A0A0A0MQD5	SH3 and multiple ankyrin repeat domains protein 3	Shank3		0.5	0	1.22376e-05	82.171	56.128	82.171																																					0.5
A0A0A0MQD5;Q4ACU6;Q4ACU6-3;Q4ACU6-9;Q4ACU6-8;Q4ACU6-7;Q4ACU6-11;Q4ACU6-10	865;790;382;172;213;258;262;164	A0A0A0MQD5;Q4ACU6-10	A0A0A0MQD5	SH3 and multiple ankyrin repeat domains protein 3	Shank3		1	43.3077	0.0294362	43.308	7.7967	43.308																																	1	43.3077	0.0294362	43.308
A0A0A0MQD5;Q4ACU6;Q4ACU6-3;Q4ACU6-9;Q4ACU6-8;Q4ACU6-7;Q4ACU6-11;Q4ACU6-12;Q4ACU6-10	1613;1538;1130;920;961;1006;1010;648;912	A0A0A0MQD5;Q4ACU6-10	A0A0A0MQD5	SH3 and multiple ankyrin repeat domains protein 3	Shank3		0.659057	2.86246	1.54671e-26	105.14	88.114	105.14	0.499228	0	0.000181871	66.262	0.556417	0.985318	2.70953e-07	77.64	0	0		NaN	0	0		NaN	0	0		NaN	0	0		NaN	0	0		NaN	0	0		NaN	0	0		NaN	0.659057
A0A0A0MQD5;Q4ACU6;Q4ACU6-3;Q4ACU6-9;Q4ACU6-8;Q4ACU6-7;Q4ACU6-11;Q4ACU6-12;Q4ACU6-10	1614;1539;1131;921;962;1007;1011;649;913	A0A0A0MQD5;Q4ACU6-10	A0A0A0MQD5	SH3 and multiple ankyrin repeat domains protein 3	Shank3		0.499228	0	0.000181871	66.262	56.575	66.262	0.499228	0	0.000181871	66.262					0	0		NaN	0	0		NaN	0	0		NaN	0	0		NaN	0	0		NaN	0	0		NaN	0	0		NaN
A0A0A0MQD5;Q4ACU6;Q4ACU6-3;Q4ACU6-9;Q4ACU6-8;Q4ACU6-7;Q4ACU6-11;Q4ACU6-12;Q4ACU6-10	1328;1253;845;635;676;721;725;363;627	A0A0A0MQD5;Q4ACU6-10	A0A0A0MQD5	SH3 and multiple ankyrin repeat domains protein 3	Shank3		1	43.9002	3.76895e-25	67.062	57.434	43.9	1	44.3954	4.03645e-09	49.585					0.999988	49.1562	6.98693e-10	50.942	0.999999	62.1559	3.76895e-25	67.062					1	43.9002	1.0116e-06	43.9					1	51.2956	1.57248e-12	51.296	1	41.8932	5.37908e-07	44.099
A0A0A0MQD5;Q4ACU6;Q4ACU6-3;Q4ACU6-9;Q4ACU6-8;Q4ACU6-7;Q4ACU6-11;Q4ACU6-12;Q4ACU6-10	1512;1437;1029;819;860;905;909;547;811	A0A0A0MQD5;Q4ACU6-10	A0A0A0MQD5	SH3 and multiple ankyrin repeat domains protein 3	Shank3		0.347816	0	2.72821e-12	53.55	46.543	53.55																																	0.347816	0	2.72821e-12	53.55	0
A0A0A0MQD5;Q4ACU6;Q4ACU6-3;Q4ACU6-9;Q4ACU6-8;Q4ACU6-7;Q4ACU6-11;Q4ACU6-12;Q4ACU6-10	1513;1438;1030;820;861;906;910;548;812	A0A0A0MQD5;Q4ACU6-10	A0A0A0MQD5	SH3 and multiple ankyrin repeat domains protein 3	Shank3		0.526266	1.41343	1.25875e-07	44.968	38.093	44.968																	0.526266	1.41343	1.25875e-07	44.968																	0
A0A0A0MQD5;Q4ACU6;Q4ACU6-3;Q4ACU6-9;Q4ACU6-8;Q4ACU6-7;Q4ACU6-11;Q4ACU6-12;Q4ACU6-10	1515;1440;1032;822;863;908;912;550;814	A0A0A0MQD5;Q4ACU6-10	A0A0A0MQD5	SH3 and multiple ankyrin repeat domains protein 3	Shank3		0.347816	0	2.72821e-12	53.55	46.543	53.55																																	0.347816	0	2.72821e-12	53.55	0
A0A0A0MQD5	57	A0A0A0MQD5	A0A0A0MQD5		Shank3		0.997675	29.5075	3.94557e-40	70.835	56.569	62.268	0.997675	29.5075	3.94399e-23	62.268	0	0		NaN	0	0		NaN	0.715161	7.02325	1.16491e-30	63.751	0	0		NaN	0	0		NaN	0.929929	14.3767	2.12337e-11	46.449	0.98925	20.5739	3.94557e-40	70.835	0.798045	7.83535	1.39769e-22	58.743	0.93756
A0A0A0MQD5;Q4ACU6;Q4ACU6-3;Q4ACU6-9;Q4ACU6-8;Q4ACU6-7;Q4ACU6-11;Q4ACU6-12;Q4ACU6-10	1652;1577;1169;959;1000;1045;1049;687;951	A0A0A0MQD5;Q4ACU6-10	A0A0A0MQD5	SH3 and multiple ankyrin repeat domains protein 3	Shank3		1	40.3494	0.000518224	54.281	43.909	40.349	0.99998	47.0787	0.000518224	54.281	0.999734	35.7464	0.00219168	44.567	0.999785	36.6817	0.0010805	49.559	0.998383	27.9049	0.00219168	44.567	0.99888	29.504	0.00288363	42.382	0.999785	36.6817	0.0010805	49.559	0.999734	35.7464	0.00219168	44.567	0.999855	38.3872	0.000722301	51.265	1	40.3494	0.00254408	43.454	0.999978
A0A0A0MQD5;Q4ACU6;Q4ACU6-3;Q4ACU6-9;Q4ACU6-8;Q4ACU6-7;Q4ACU6-11;Q4ACU6-12;Q4ACU6-10	1658;1583;1175;965;1006;1051;1055;693;957	A0A0A0MQD5;Q4ACU6-10	A0A0A0MQD5	SH3 and multiple ankyrin repeat domains protein 3	Shank3		1	40.3494	0.0104772	40.349	26.191	40.349	0	0		NaN					0	0		NaN	0	0		NaN	0	0		NaN	0	0		NaN	0	0		NaN	0	0		NaN	1	40.3494	0.0104772	40.349
A0A0A0MQD5;Q4ACU6	450;375	A0A0A0MQD5	A0A0A0MQD5	SH3 and multiple ankyrin repeat domains protein 3	Shank3		0.974997	15.9108	1.64697e-30	91.114	81.552	70.569	0.838936	7.16807	4.84863e-07	53.475	0.785157	5.62838	7.08931e-13	68.657	0.864229	8.03821	9.72138e-18	77.19	0.860956	7.91834	1.0385e-14	74.748	0.957202	13.4962	3.91297e-11	63.115	0.851318	7.57845	9.73192e-11	62.237	0.974301	15.7877	1.64697e-30	91.114	0.855565	7.72581	2.49233e-14	72.881	0.974997	15.9108	4.29244e-14	70.569	0.879733
A0A0A0MQD5;Q4ACU6;Q4ACU6-3;Q4ACU6-9;Q4ACU6-8;Q4ACU6-7;Q4ACU6-11;Q4ACU6-12;Q4ACU6-10	1585;1510;1102;892;933;978;982;620;884	A0A0A0MQD5;Q4ACU6-10	A0A0A0MQD5	SH3 and multiple ankyrin repeat domains protein 3	Shank3		1	80.5107	3.18808e-25	95.197	86.892	95.197	0.999991	50.6647	9.2118e-06	59.261	0.999982	47.4545	1.62877e-05	52.453	0.999994	51.969	9.31524e-06	59.513	1	65.9091	5.00068e-07	73.279	0.99995	43.0218	1.34202e-05	54.281					0.999989	49.4205	1.27629e-05	54.7	0.999998	57.1275	4.71201e-06	67.605	0.999963	44.3436	1.71743e-05	51.888	1
A0A0A0MQD5;Q4ACU6	469;394	A0A0A0MQD5	A0A0A0MQD5	SH3 and multiple ankyrin repeat domains protein 3	Shank3		1	49.3004	4.63905e-06	84.479	68.85	49.3	1	61.3533	0.000368037	63.727	1	49.3004	4.63905e-06	84.479	1	50.2836	3.26055e-05	78.692	1	58.6765	7.50757e-05	74.611	1	73.8478	8.74312e-05	73.848	1	50.3534	0.00031691	65.179	1	69.9792	0.000166535	69.979	1	42.2105	8.74312e-05	73.848	1	67.4565	0.00023674	67.456	1
A0A0A0MQD5;Q4ACU6;Q4ACU6-3;Q4ACU6-9;Q4ACU6-8;Q4ACU6-7;Q4ACU6-11;Q4ACU6-10	965;890;482;272;313;358;362;264	A0A0A0MQD5;Q4ACU6-10	A0A0A0MQD5	SH3 and multiple ankyrin repeat domains protein 3	Shank3		0.99999	49.9281	1.30981e-33	75.654	73.796	75.654	0	0		NaN	0	0		NaN	0	0		NaN	0.998841	29.7169	2.4985e-06	43.896	0.968975	14.9601	2.91909e-06	43.703	0	0		NaN	0	0		NaN	0	0		NaN	0	0		NaN	0.99999
A0A0A0MQD5;Q4ACU6;Q4ACU6-3;Q4ACU6-9;Q4ACU6-8;Q4ACU6-7;Q4ACU6-11;Q4ACU6-12;Q4ACU6-10	1241;1166;758;548;589;634;638;276;540	A0A0A0MQD5;Q4ACU6-10	A0A0A0MQD5	SH3 and multiple ankyrin repeat domains protein 3	Shank3		1	59.4259	0.000156061	76.228	65.814	59.426	1	50.2923	0.00332217	50.292					0	0		NaN	0	0		NaN					1	76.2278	0.000156061	76.228	1	58.3699	0.00102872	58.37	1	57.785	0.00101511	57.785	1	59.4259	0.00105327	59.426	0
A0A0A0MQD5;Q4ACU6;Q4ACU6-3;Q4ACU6-9;Q4ACU6-8;Q4ACU6-7;Q4ACU6-11;Q4ACU6-12;Q4ACU6-10	1709;1634;1226;1016;1057;1102;1106;744;1008	A0A0A0MQD5;Q4ACU6-10	A0A0A0MQD5	SH3 and multiple ankyrin repeat domains protein 3	Shank3		0.564351	1.12925	1.97116e-30	85.518	69.503	83.606	0.564351	1.12925	3.23147e-30	83.606	0.528038	0	1.29118e-07	55.406	0.456457	1.18043	4.55025e-11	60.133	0.424411	0	3.579e-12	63.376									0.465275	0	2.63163e-20	71.085					0.420855	0	6.1389e-11	58.904	0.436111
A0A0A0MQD5;Q4ACU6;Q4ACU6-3;Q4ACU6-9;Q4ACU6-8;Q4ACU6-7;Q4ACU6-11;Q4ACU6-12;Q4ACU6-10	1711;1636;1228;1018;1059;1104;1108;746;1010	A0A0A0MQD5;Q4ACU6-10	A0A0A0MQD5	SH3 and multiple ankyrin repeat domains protein 3	Shank3		0.802392	6.9941	1.43969e-47	97.776	79.239	68.444	0.674347	6.26436	1.63879e-38	93.583	0.528941	2.58121	1.43969e-47	97.776	0	0		NaN	0.424411	0	3.579e-12	63.376	0.616553	4.0966	2.83481e-20	70.699	0.757677	6.19411	2.18459e-11	61.963	0.465275	0	2.63163e-20	71.085	0.644036	2.8283	6.38641e-11	58.712	0.525529	0.783388	6.1389e-11	58.904	0.548682
A0A0A0MQD5;Q4ACU6;Q4ACU6-3;Q4ACU6-9;Q4ACU6-8;Q4ACU6-7;Q4ACU6-11;Q4ACU6-12;Q4ACU6-10	1713;1638;1230;1020;1061;1106;1110;748;1012	A0A0A0MQD5;Q4ACU6-10	A0A0A0MQD5	SH3 and multiple ankyrin repeat domains protein 3	Shank3		0.806393	6.37954	3.23147e-30	83.606	69.734	68.444	0.495458	0	3.23147e-30	83.606	0.591573	1.4081	1.29118e-07	55.406	0	0		NaN	0	0		NaN	0.647987	4.0966	1.98615e-07	54.311	0.785579	6.19411	9.27305e-06	49.088	0	0		NaN	0.580727	0.388472	1.09072e-16	67.11	0.704051	4.72269	9.27305e-06	49.088	0.766167
A0A0A0MQD5;Q4ACU6;Q4ACU6-3;Q4ACU6-9;Q4ACU6-8;Q4ACU6-7;Q4ACU6-11;Q4ACU6-12;Q4ACU6-10	1715;1640;1232;1022;1063;1108;1112;750;1014	A0A0A0MQD5;Q4ACU6-10	A0A0A0MQD5	SH3 and multiple ankyrin repeat domains protein 3	Shank3		0.495458	0	3.23147e-30	83.606	69.734	83.606	0.495458	0	3.23147e-30	83.606					0	0		NaN	0	0		NaN									0	0		NaN	0.286477	0	1.09072e-16	67.11
F7CGP0;A0A0A0MQD7;A3KGS3-2;A3KGS3	489;856;818;818	F7CGP0	F7CGP0	Ral GTPase-activating protein subunit alpha-2	Ralgapa2		0.569389	1.71708	0.000259917	72.958	32.369	72.958	0	0		NaN	0	0		NaN	0	0		NaN					0	0		NaN	0	0		NaN	0	0		NaN	0.569389	1.71708	0.000259917	72.958					0
F7CGP0;A0A0A0MQD7;A3KGS3-2;A3KGS3	490;857;819;819	F7CGP0	F7CGP0	Ral GTPase-activating protein subunit alpha-2	Ralgapa2		0.874968	7.78005	7.23542e-08	91.62	45.268	60.564	0.874968	7.78005	7.23542e-08	60.564	0.592331	3.61079	0.00581291	53.034	0.804787	6.02729	0.000154622	47.062	0.834723	6.07502	1.19809e-07	91.62	0.660076	5.41732	0.0194108	42.843	0.649797	5.69489	0.0239786	41.218	0	0		NaN	0.77729	3.32873	1.05916e-06	54.974	0.816178	5.44856	4.44504e-05	65.295	0.824998
F7CGP0;A0A0A0MQD7;A3KGS3-2;A3KGS3	491;858;820;820	F7CGP0	F7CGP0	Ral GTPase-activating protein subunit alpha-2	Ralgapa2		0.994803	25.8301	1.01983e-76	128.41	110.66	128.41	0.874968	7.78005	7.23542e-08	60.564	0.994803	25.8301	1.01983e-76	128.41	0.977271	15.3666	8.86973e-18	84.829	0.834723	6.07502	6.41126e-08	57.293	0	0		NaN	0.722417	7.16425	2.74192e-07	54.368	0	0		NaN	0.702015	2.06418	4.37682e-13	80.303	0.828366	5.74649	3.27491e-08	65.949	0.824998
F7CGP0;A0A0A0MQD7;A3KGS3-2;A3KGS3	367;696;696;696	F7CGP0	F7CGP0	Ral GTPase-activating protein subunit alpha-2	Ralgapa2		0.999872	39.5299	0.00798273	88.948	38.341	88.948	0.997899	27.4087	0.0176445	76.827	0.998161	27.4087	0.0176445	76.827	0.999425	33.0162	0.0197506	74.464	0.998022	27.4087	0.0176445	76.827	0.998165	27.4087	0.0176445	76.827	0.997194	25.5138	0.00946007	87.476	0.99779	26.9635	0.0254453	67.993	0.997605	26.2833	0.0257612	65.305	0.991223	22.8588	0.0176445	76.827	0.999872
F7CGP0;A0A0A0MQD7;A3KGS3-2;A3KGS3	157;486;486;486	F7CGP0	F7CGP0	Ral GTPase-activating protein subunit alpha-2	Ralgapa2		0.999519	34.1468	8.48394e-07	93.345	80.308	93.345	0.999519	34.1468	8.48394e-07	93.345	0.963818	15.9166	0.0011226	62.408	0.992607	22.8012	0.000798658	61.435	0.943002	15.8465	0.00710922	41.283	0.994654	24.4062	0.000225756	74.76	0.998043	27.9683	1.60418e-06	89.403	0.992756	22.4846	0.000440648	70.488	0.965653	16.2609	0.00342058	47.288	0.998394	28.6512	7.94444e-06	76.655	0.997203
A0A0A0MQM6;I1E4X2;A0A0A0MQE0;E9Q6Z8;F8VQL7;A0A0R4J1Z4;P25425-10;P25425-4;P25425-7;P25425-9;P25425-11;P25425-8;P25425-3;P25425-6;P25425-2;P25425-5;P25425;P25425-12	265;318;370;381;370;381;358;352;358;358;370;358;358;358;358;370;358;380	A0A0A0MQM6	A0A0A0MQM6	POU domain protein;POU domain, class 2, transcription factor 1	Pou2f1		0.161874	0	1.26451e-07	41.89	36.984	41.89																																					0.161874
A0A0A0MQM6;I1E4X2;A0A0A0MQE0;E9Q6Z8;F8VQL7;A0A0R4J1Z4;P25425-10;P25425-4;P25425-7;P25425-9;P25425-11;P25425-8;P25425-3;P25425-6;P25425-2;P25425-5;P25425;P25425-12	266;319;371;382;371;382;359;353;359;359;371;359;359;359;359;371;359;381	A0A0A0MQM6	A0A0A0MQM6	POU domain protein;POU domain, class 2, transcription factor 1	Pou2f1		0.161874	0	1.26451e-07	41.89	36.984	41.89																																					0.161874
A0A0A0MQM6;I1E4X2;A0A0A0MQE0;E9Q6Z8;F8VQL7;A0A0R4J1Z4;P25425-10;P25425-4;P25425-7;P25425-9;P25425-11;P25425-8;P25425-3;P25425-6;P25425-2;P25425-5;P25425;P25425-12	268;321;373;384;373;384;361;355;361;361;373;361;361;361;361;373;361;383	A0A0A0MQM6	A0A0A0MQM6	POU domain protein;POU domain, class 2, transcription factor 1	Pou2f1		0.161874	0	1.26451e-07	41.89	36.984	41.89																																					0.161874
A0A0A0MQM6;I1E4X2;A0A0A0MQE0;E9Q6Z8;F8VQL7;A0A0R4J1Z4;P25425-10;P25425-4;P25425-7;P25425-9;P25425-11;P25425-8;P25425-3;P25425-6;P25425-2;P25425-5;P25425;P25425-12	271;324;376;387;376;387;364;358;364;364;376;364;364;364;364;376;364;386	A0A0A0MQM6	A0A0A0MQM6	POU domain protein;POU domain, class 2, transcription factor 1	Pou2f1		0.161874	0	1.26451e-07	41.89	36.984	41.89																																					0.161874
A0A0A0MQM6;I1E4X2;A0A0A0MQE0;E9Q6Z8;F8VQL7;A0A0R4J1Z4;P25425-10;P25425-4;P25425-7;P25425-9;P25425-11;P25425-8;P25425-3;P25425-6;P25425-2;P25425-5;P25425;P25425-12	272;325;377;388;377;388;365;359;365;365;377;365;365;365;365;377;365;387	A0A0A0MQM6	A0A0A0MQM6	POU domain protein;POU domain, class 2, transcription factor 1	Pou2f1		0.161874	0	1.26451e-07	41.89	36.984	41.89																																					0.161874
A0A0A0MQE5;A2AHC3	1069;1069	A0A0A0MQE5	A0A0A0MQE5	Calmodulin-regulated spectrin-associated protein 1	Camsap1		0.989331	19.6724	7.53447e-08	74.776	67.154	41.912	0	0		NaN	0	0		NaN	0.883546	8.80073	3.29893e-05	45.047	0.986674	18.6947	7.53447e-08	74.776	0.989331	19.6724	0.000101982	41.912					0	0		NaN	0.92133	10.6861	3.42328e-06	56.055
A0A0A0MQE5;A2AHC3;A2AHC4;A2AHC3-2	553;553;573;573	A0A0A0MQE5	A0A0A0MQE5	Calmodulin-regulated spectrin-associated protein 1	Camsap1		0.999982	47.5583	2.25827e-08	91.858	75.084	91.858	0.987588	19.0124	7.5504e-05	77.185					0.970749	15.2113	0.000157758	66.498	0.999237	31.1792	8.4954e-05	75.479	0.999035	30.1608	7.93263e-05	74.46	0.998528	28.4094	6.62235e-05	72.089	0.837637	7.51927	0.0184331	44.863	0.999982	47.5583	2.25827e-08	91.858	0.996786	24.9345	8.6394e-05	75.739	0.862126
A0A0A0MQE5;A2AHC3;A2AHC4;A2AHC3-2	560;560;580;580	A0A0A0MQE5	A0A0A0MQE5	Calmodulin-regulated spectrin-associated protein 1	Camsap1		0.5	0	1.68538e-25	90.759	73.642	90.759	0.499999	0	0.0027965	58.32	0.499997	0	0.00705801	51.771	0.499998	0	0.00594276	53.377	0.5	0	0.00262515	61.657	0.5	0	1.68538e-25	90.759	0.499994	0	0.0142525	48.112	0.499999	0	0.00320073	57.328	0.499999	0	0.0216042	54.898					0.499999
A0A0A0MQE5;A2AHC3	1407;1407	A0A0A0MQE5	A0A0A0MQE5	Calmodulin-regulated spectrin-associated protein 1	Camsap1		0.999999	60.0911	7.3834e-05	75.479	58.536	75.479	0.999957	43.6677	0.000927969	55.261	0.999229	31.1242	0.00488831	42.718	0.999999	59.2088	7.3834e-05	73.466	0.999996	53.7545	0.00017239	66.023	0.99957	33.6635	0.00321597	45.257					0	0		NaN	0	0		NaN	0.999886	39.4196	0.00639121	51.013	0.999999
B7ZCJ0;A0A0A0MQE8;B7ZCJ1;Q6DFV3;A2BHQ2	42;36;42;41;43	B7ZCJ0	B7ZCJ0	Rho GTPase-activating protein 21	Arhgap21		0.996611	24.6853	7.35256e-63	115.34	106.74	115.34	0.996611	24.6853	7.35256e-63	115.34	0.496848	0	2.01253e-05	43.12	0.608661	1.96456	2.45708e-05	42.106	0.918649	10.5282	1.09039e-32	95.094	0.835058	7.08977	1.15222e-06	51.546	0.981361	17.2337	8.19701e-33	96.544	0.978368	16.579	5.29695e-18	85.146	0.856993	7.7801	1.03504e-18	87.85	0.988405	19.3123	1.50392e-24	89.049	0.96768
B7ZCJ0;A0A0A0MQE8;B7ZCJ1;Q6DFV3;A2BHQ2	44;38;44;43;45	B7ZCJ0	B7ZCJ0	Rho GTPase-activating protein 21	Arhgap21		0.540997	0.770109	5.37216e-09	66.868	63.149	49.638					0.496848	0	2.01253e-05	43.12	0	0		NaN	0.533223	0.595093	4.51512e-06	48.984	0.49932	0	8.07972e-06	47.047									0.499986	0	5.37216e-09	66.868	0.499179	0	9.9578e-06	46.027	0.49851
B7ZCJ0;A0A0A0MQE8;B7ZCJ1;Q6DFV3;G3UWM5	610;614;620;609;449	B7ZCJ0	B7ZCJ0	Rho GTPase-activating protein 21	Arhgap21		1	45.8792	0.00114466	69.423	18.817	45.879	1	52.3906	0.0145558	52.391	0	0		NaN	1	69.4234	0.00114466	69.423	1	52.2469	0.0148057	52.247	1	55.4522	0.00922969	55.452	1	50.3537	0.0185741	50.354	1	41.4482	0.0539297	41.448	1	43.8967	0.0380222	43.897	1	53.5687	0.0125063	53.569	1
B7ZCJ0;A0A0A0MQE8;B7ZCJ1;Q6DFV3;G3UWM5;G3UX38	1123;1127;1133;1122;962;238	B7ZCJ0	B7ZCJ0	Rho GTPase-activating protein 21	Arhgap21		1	51.0662	0.0409793	51.066	7.9833	51.066	0	0		NaN	0	0		NaN					0	0		NaN									0	0		NaN	0	0		NaN	0	0		NaN	1
B7ZCJ0;A0A0A0MQE8;B7ZCJ1;Q6DFV3	1729;1733;1739;1728	B7ZCJ0	B7ZCJ0	Rho GTPase-activating protein 21	Arhgap21		0.994343	25.5856	0.00106562	64.439	39.585	52.555	0	0		NaN	0	0		NaN	0	0		NaN	0	0		NaN	0	0		NaN	0	0		NaN	0	0		NaN	0.994343	25.5856	0.00114587	63.408	0	0		NaN	0.970934
B7ZCJ0;A0A0A0MQE8;B7ZCJ1;Q6DFV3;G3UWM5;G3UX38	918;922;928;917;757;32	B7ZCJ0	B7ZCJ0	Rho GTPase-activating protein 21	Arhgap21		0.994869	23.5762	1.30708e-12	95.854	77.629	86.467	0.693403	5.90688	0.000146213	65.805	0.981076	17.4524	1.30708e-12	95.854	0.978518	17.2657	1.32152e-08	92.935	0.820912	7.35142	7.11857e-05	73.156	0.969324	18.0136	8.61472e-05	77.912	0.953267	16.2438	0.00131171	49.929					0.994869	23.5762	5.90406e-06	86.467	0.652704	3.53181	0.00288754	51.643	0.982371
B7ZCJ0;A0A0A0MQE8;B7ZCJ1;Q6DFV3;G3UWM5;G3UX38	919;923;929;918;758;33	B7ZCJ0	B7ZCJ0	Rho GTPase-activating protein 21	Arhgap21		0.517576	1.35467	7.11857e-05	60.918	40.822	59.513	0.333327	0	0.000146213	56.514	0.333208	0	0.00121299	41.871	0	0		NaN	0.333331	0	7.11857e-05	60.918	0	0		NaN	0.333245	0	0.00131171	41.088					0	0		NaN	0	0		NaN	0.517576
B7ZCJ0;A0A0A0MQE8;B7ZCJ1;Q6DFV3;G3UWM5;G3UX38	920;924;930;919;759;34	B7ZCJ0	B7ZCJ0	Rho GTPase-activating protein 21	Arhgap21		0.333331	0	7.11857e-05	60.918	40.822	60.918	0.333327	0	0.000146213	56.514	0.333208	0	0.00121299	41.871	0	0		NaN	0.333331	0	7.11857e-05	60.918	0	0		NaN	0.333245	0	0.00131171	41.088					0	0		NaN	0	0		NaN
B7ZCJ0;A0A0A0MQE8;B7ZCJ1;Q6DFV3;G3UWM5	737;741;747;736;576	B7ZCJ0	B7ZCJ0	Rho GTPase-activating protein 21	Arhgap21		0.5	0	0.0012744	48.704	30.904	48.704													0.5	0	0.0012744	48.704					0.5	0	0.00331604	43.813									0	0		NaN
B7ZCJ0;A0A0A0MQE8;B7ZCJ1;Q6DFV3;G3UWM5	851;855;861;850;690	B7ZCJ0	B7ZCJ0	Rho GTPase-activating protein 21	Arhgap21		0.999432	32.4596	1.13527e-18	79.558	72.606	79.558	0.937765	11.7825	6.49239e-13	64.502	0.913687	10.2612	2.14788e-07	54.271	0.499156	0	1.34124e-05	42.711	0.979946	16.8961	3.83302e-09	57.351	0	0		NaN	0	0		NaN					0.719828	4.10071	2.14388e-07	52.329	0.991061	20.4498	1.01292e-14	70.112	0.998888
B7ZCJ0;A0A0A0MQE8;B7ZCJ1;Q6DFV3;G3UWM5	856;860;866;855;695	B7ZCJ0	B7ZCJ0	Rho GTPase-activating protein 21	Arhgap21		0.774286	5.39338	6.18844e-08	56.529	47.597	42.321					0.494935	0	2.14788e-07	54.271	0.499156	0	1.34124e-05	42.711	0.499539	0	1.41465e-05	41.136	0	0		NaN	0	0		NaN	0.774286	5.39338	1.24193e-05	42.321	0.545015	0.784497	2.15553e-07	54.259	0.499912	0	6.18844e-08	56.529
B7ZCJ0;A0A0A0MQE8;B7ZCJ1;Q6DFV3;G3UWM5	470;474;480;469;309	B7ZCJ0	B7ZCJ0	Rho GTPase-activating protein 21	Arhgap21		0.480758	0.493555	1.76242e-05	48.547	36.419	48.547	0	0		NaN									0.480758	0.493555	1.76242e-05	48.547					0	0		NaN	0	0		NaN					0.472696	0.43485	0.000132915	40.52
B7ZCJ0;A0A0A0MQE8;B7ZCJ1;Q6DFV3;G3UWM5	472;476;482;471;311	B7ZCJ0	B7ZCJ0	Rho GTPase-activating protein 21	Arhgap21		0.799054	6.08768	3.30489e-06	56.29	48.957	56.29	0	0		NaN																	0	0		NaN	0	0		NaN	0.746605	5.7271	3.15077e-05	45.384					0.799054
B7ZCJ0;A0A0A0MQE8;B7ZCJ1;Q6DFV3;G3UWM5	315;319;325;314;154	B7ZCJ0	B7ZCJ0	Rho GTPase-activating protein 21	Arhgap21		0.925689	14.2497	7.21245e-09	65.753	48.675	65.207									0.925689	14.2497	8.11449e-09	65.207	0.756984	7.96796	1.14269e-08	57.496													0	0		NaN					0.838663
A0A0A0MQJ6;A2A8R7;B2RX14	137;176;176	A0A0A0MQJ6	A0A0A0MQJ6	Terminal uridylyltransferase 4	Zcchc11		0.999903	40.1131	0.0033711	40.113	35.13	40.113																					0	0		NaN									0	0		NaN	0.999903
A0A0A0MQJ6;A2A8R7;B2RX14	92;131;131	A0A0A0MQJ6	A0A0A0MQJ6	Terminal uridylyltransferase 4	Zcchc11		1	50.0403	0.0234237	71.379	38.117	50.04	1	57.5896	0.0322263	57.59	1	50.0403	0.044881	50.04	1	48.4235	0.0676823	48.423	1	68.0161	0.0254426	68.016					0	0		NaN	1	71.3794	0.0234237	71.379
A0A0A6YVU8;Q9JKV1	211;211	A0A0A6YVU8	A0A0A6YVU8	Proteasomal ubiquitin receptor ADRM1	Gm9774;Adrm1		0.971114	15.2793	0.000257342	50.608	38.248	50.608					0	0		NaN					0	0		NaN	0	0		NaN	0.916652	10.5044	0.0011599	40.237	0.971114	15.2793	0.000257342	50.608					0	0		NaN	0
A0A0A6YVU8;Q9JKV1	213;213	A0A0A6YVU8	A0A0A6YVU8	Proteasomal ubiquitin receptor ADRM1	Gm9774;Adrm1		0.561609	1.07819	0.000473209	46.408	33.531	46.408					0	0		NaN					0	0		NaN	0	0		NaN	0	0		NaN	0	0		NaN					0	0		NaN	0.561609
A0A0A6YVU8;Q9JKV1	219;219	A0A0A6YVU8	A0A0A6YVU8	Proteasomal ubiquitin receptor ADRM1	Gm9774;Adrm1		0.166531	0	0.000148944	55.66	36.828	55.66					0	0		NaN					0.166531	0	0.000148944	55.66	0	0		NaN	0	0		NaN	0.164143	0	0.000414776	47.545					0	0		NaN	0
A0A0A6YVU8;Q9JKV1	220;220	A0A0A6YVU8	A0A0A6YVU8	Proteasomal ubiquitin receptor ADRM1	Gm9774;Adrm1		0.166531	0	0.000148944	55.66	36.828	55.66					0	0		NaN					0.166531	0	0.000148944	55.66	0	0		NaN	0	0		NaN	0.164143	0	0.000414776	47.545					0	0		NaN	0
A0A0A6YVU8;Q9JKV1	221;221	A0A0A6YVU8	A0A0A6YVU8	Proteasomal ubiquitin receptor ADRM1	Gm9774;Adrm1		0.166531	0	0.000148944	55.66	36.828	55.66					0	0		NaN					0.166531	0	0.000148944	55.66	0	0		NaN	0	0		NaN	0.164143	0	0.000414776	47.545					0	0		NaN	0
A0A0A6YVU8;Q9JKV1	223;223	A0A0A6YVU8	A0A0A6YVU8	Proteasomal ubiquitin receptor ADRM1	Gm9774;Adrm1		0.166531	0	0.000148944	55.66	36.828	55.66					0	0		NaN					0.166531	0	0.000148944	55.66	0	0		NaN	0	0		NaN	0.164143	0	0.000414776	47.545					0	0		NaN	0
A0A0A6YVU8;Q9JKV1	224;224	A0A0A6YVU8	A0A0A6YVU8	Proteasomal ubiquitin receptor ADRM1	Gm9774;Adrm1		0.166531	0	0.000148944	55.66	36.828	55.66					0	0		NaN					0.166531	0	0.000148944	55.66	0	0		NaN	0	0		NaN	0.164143	0	0.000414776	47.545					0	0		NaN	0
A0A0R4J2D7;A0A0A6YVV4;A0A0A6YXJ3;Q3TRR0-2;Q3TRR0	160;160;160;160;160	A0A0R4J2D7	A0A0R4J2D7	Microtubule-associated protein 9	Map9		0.408676	0	3.98537e-11	58.477	52.409	58.477	0	0		NaN	0	0		NaN	0	0		NaN	0.408676	0	3.98537e-11	58.477													0	0		NaN					0
A0A0R4J2D7;A0A0A6YVV4;A0A0A6YXJ3;Q3TRR0-2;Q3TRR0	161;161;161;161;161	A0A0R4J2D7	A0A0R4J2D7	Microtubule-associated protein 9	Map9		0.408676	0	3.98537e-11	58.477	52.409	58.477	0	0		NaN	0	0		NaN	0	0		NaN	0.408676	0	3.98537e-11	58.477													0	0		NaN					0
A0A0A6YW06;J3QNM3;E9QKQ9;E9QLZ9;Q03173-4;Q03173-5;Q03173	332;336;336;351;332;336;351	A0A0A6YW06	A0A0A6YW06	Protein enabled homolog	Enah		0.887606	6.2265	1.00857e-06	53.059	45.347	53.059					0	0		NaN	0.717539	2.47223	9.66655e-05	41.16	0.854101	4.91137	1.65672e-05	46.403					0	0		NaN					0.660626	0	1.00857e-06	53.059	0	0		NaN	0.837709
A0A0A6YW06;J3QNM3;E9QKQ9;E9QLZ9;Q03173-4;Q03173-5;Q03173	335;339;339;354;335;339;354	A0A0A6YW06	A0A0A6YW06	Protein enabled homolog	Enah		0.7318	2.14262	2.48164e-12	88.441	76.575	53.262	0.67066	0.615929	1.32212e-07	76.655	0.499767	0	0.000541609	45.077	0.499798	0	1.2151e-05	50.354	0.7318	2.14262	5.19216e-08	61.102	0.499404	0	8.66433e-05	49.448	0.442245	0	7.56206e-06	49.106	0.499999	0	2.48164e-12	88.441	0.660626	0	1.05257e-07	56.72	0.48781	0.868205	5.33153e-08	58.015	0.648844
A0A0A6YW06;J3QNM3;E9QKQ9;E9QLZ9;Q03173-4;Q03173-5;Q03173	336;340;340;355;336;340;355	A0A0A6YW06	A0A0A6YW06	Protein enabled homolog	Enah		0.988528	19.3619	2.48164e-12	88.441	76.575	78.932	0.67066	0.615929	1.32212e-07	76.655	0.499767	0	0.000541609	45.077	0.775734	3.51866	1.2151e-05	50.354	0.866178	8.11102	5.19216e-08	77.562	0.499404	0	0.000316972	49.448	0.816187	6.48447	7.56206e-06	57.328	0.499999	0	2.48164e-12	88.441	0.660626	0	2.13634e-10	82.651	0.550382	0.891537	0.000523274	45.434	0.988528
A0A0A6YW06;J3QNM3;E9QKQ9;E9QLZ9;Q03173-4;Q03173-5;Q03173;A0A0A6YXC8;Q03173-6;Q03173-3;E9QKR1	125;129;129;144;125;129;144;145;125;125;125	A0A0A6YW06;E9QKR1	A0A0A6YW06	Protein enabled homolog	Enah		1	91.1346	9.73103e-74	114.9	105.08	114.74	0.999998	56.3244	9.364e-24	83.934	1	91.1346	1.00657e-73	114.74	1	84.5803	2.22572e-61	107.58	1	80.8883	9.73103e-74	114.9	0.999999	58.401	2.79951e-31	92.41	0.999999	60.5324	6.56934e-31	89.297	0.998437	28.0545	2.79525e-07	51.966	1	73.6963	1.05176e-50	102.46	0.999906	40.2749	3.83391e-13	67.31	1
A0A0A6YW06;J3QNM3;E9QKQ9;E9QLZ9;Q03173-4;Q03173-5;Q03173;A0A0A6YXC8;Q03173-6;Q03173-3;Q03173-2	723;727;727;742;721;725;740;462;445;479;328	A0A0A6YW06	A0A0A6YW06	Protein enabled homolog	Enah		0.979505	17.2229	2.24738e-26	110.37	95.173	66.533	0.796752	6.10742	4.58655e-11	93.495	0.845589	7.39247	4.21213e-26	107.75	0.790844	5.80061	1.82246e-07	84.035	0.881633	8.73363	1.65098e-15	97.284	0.886822	8.94895	4.21213e-26	107.75	0.919167	10.6806	1.17093e-07	85.636	0.855028	7.9602	1.82246e-07	84.035	0.979505	17.2229	1.00684e-06	82.707	0.847618	7.48244	4.98812e-08	87.287	0.853731
A0A0A6YW67;E9Q9J0;E9Q4P0;E9Q5F6;E9QNP0;Q5SX22;P62984;P62983;P0CG49;P0CG50	65;65;169;65;169;65;65;65;65;65	A0A0A6YW67	A0A0A6YW67	Ubiquitin-60S ribosomal protein L40;Ubiquitin;60S ribosomal protein L40;Ubiquitin-40S ribosomal protein S27a;Ubiquitin;40S ribosomal protein S27a;Polyubiquitin-B;Ubiquitin;Polyubiquitin-C;Ubiquitin;Ubiquitin-related 1;Ubiquitin-related 2	Gm8797;Uba52;Kxd1;Ubc;Ubb;Rps27a		0.5	0	6.17782e-06	76.827	51.39	40.058					0	0		NaN					0.5	0	0.0049461	46.158	0.5	0	3.09415e-05	48.656					0	0		NaN	0.5	0	0.000886244	76.827	0.499086	0	8.13325e-06	53.909	0.429543
A0A0A6YWA6;A0A0A6YY36;A0A0A6YWB9;A0A0A6YW93;Q61391	4;4;4;4;4	A0A0A6YWA6	A0A0A6YWA6	Neprilysin	Mme		0.620547	2.14755	9.40767e-20	91.583	70.185	58.914	0.561453	1.07362	6.27249e-06	58.366	0	0		NaN	0.499911	0	1.61473e-06	69.133	0	0		NaN	0	0		NaN	0.620547	2.14755	6.43184e-06	58.914	0	0		NaN	0.499999	0	9.40767e-20	91.583	0.496995	0	1.1518e-05	52.483	0.499669
A0A0A6YWA6;A0A0A6YY36;A0A0A6YWB9;A0A0A6YW93;Q61391	6;6;6;6;6	A0A0A6YWA6	A0A0A6YWA6	Neprilysin	Mme		0.970757	15.2283	9.40767e-20	91.583	70.185	69.729	0.926664	11.2422	0.000131049	51.225	0.564585	1.12938	7.08501e-06	64.295	0.772182	5.82019	1.61473e-06	69.133	0.863311	8.00486	6.39e-07	78.285	0.765704	5.15994	6.19753e-05	46.154	0	0		NaN	0	0		NaN	0.970757	15.2283	9.40767e-20	91.583	0.496995	0	1.1518e-05	52.483	0.966946
E9QNQ4;A0A0A6YWG7;Q8CHG7	581;731;583	E9QNQ4	E9QNQ4	Rap guanine nucleotide exchange factor 2	Rapgef2		0.299959	0	2.26411e-07	51.029	43.997	45.88									0	0		NaN																									0.281995
E9QNQ4;A0A0A6YWG7;Q8CHG7	582;732;584	E9QNQ4	E9QNQ4	Rap guanine nucleotide exchange factor 2	Rapgef2		0.437727	0	1.96187e-12	62.683	55.73	62.683									0	0		NaN					0.417809	0	8.36322e-07	50.294									0.437727	0	1.96187e-12	62.683					0.281995
E9QNQ4;A0A0A6YWG7;Q8CHG7	583;733;585	E9QNQ4	E9QNQ4	Rap guanine nucleotide exchange factor 2	Rapgef2		0.74989	6.65301	1.96187e-12	62.683	55.73	55.413									0	0		NaN	0.74989	6.65301	2.06055e-08	55.413	0.417809	0	8.36322e-07	50.294									0.437727	0	1.96187e-12	62.683					0.281995
E9QNQ4;A0A0A6YWG7;Q8CHG7	958;1108;960	E9QNQ4	E9QNQ4	Rap guanine nucleotide exchange factor 2	Rapgef2		0.881299	8.70671	0.00161653	100.88	63.534	88.681	0.881299	8.70671	0.00405476	88.681					0	0		NaN	0.835116	7.04568	0.0452036	50.353					0.879311	8.62474	0.00879509	79.974					0	0		NaN
E9QNQ4;A0A0A6YWG7;Q8CHG7	1020;1170;1022	E9QNQ4	E9QNQ4	Rap guanine nucleotide exchange factor 2	Rapgef2		0.499661	0	0.0149749	58.981	36.34	54.416	0	0		NaN																	0.497618	0	0.0149749	58.981					0.499661	0	0.0279397	54.416
A0A0A6YWP5;Q9WVF8	50;50	A0A0A6YWP5	A0A0A6YWP5	Tumor suppressor candidate 2	Tusc2		0.906124	9.86626	7.65468e-06	45.253	38.3	43.291																					0.906124	9.86626	1.3293e-05	43.291	0.515987	0.280829	1.71679e-05	42.041	0.693136	3.55005	7.65468e-06	45.253	0	0		NaN
A0A0A6YWR8;P97820;E9PVG7;A0A0A6YW53;B7ZNR9;B2RUE8;F8VPL5;A0A0A6YWM8;A0A0A6YWJ2	795;794;849;849;769;718;799;769;204	A0A0A6YWR8	A0A0A6YWR8	Mitogen-activated protein kinase kinase kinase kinase 4	Map4k4		0.868915	8.21581	1.49102e-06	75.764	61.074	71.344	0	0		NaN					0.49986	0	1.49102e-06	75.764	0.868915	8.21581	2.03114e-05	71.344	0.540642	0.790237	0.000119234	58.079	0	0		NaN					0	0		NaN					0.847239
A0A0A6YWR8;P97820;E9PVG7;A0A0A6YW53;B7ZNR9;B2RUE8;F8VPL5;A0A0A6YWM8;A0A0A6YWJ2	796;795;850;850;770;719;800;770;205	A0A0A6YWR8	A0A0A6YWR8	Mitogen-activated protein kinase kinase kinase kinase 4	Map4k4		0.837555	7.29461	1.49102e-06	75.764	61.074	63.894	0.833732	7.1912	0.00012625	62.377					0.49986	0	1.49102e-06	75.764	0.496765	0	0.000362209	48.568					0.835083	7.1912	0.00012625	62.377	0.717133	5.35343	0.0377077	43.69	0	0		NaN					0.837555
A0A0A6YWR8;P97820;A0A0A6YXE5	544;543;109	A0A0A6YWR8	A0A0A6YWR8	Mitogen-activated protein kinase kinase kinase kinase 4	Map4k4		0.997433	25.8949	8.30031e-06	84.169	57.726	84.169	0.812482	6.3677	0.00217914	52.247					0	0		NaN																	0	0		NaN					0.997433
A0A0A6YWR8;P97820;E9PVG7;A0A0A6YW53;B7ZNR9;B2RUE8;F8VPL5;A0A0A6YWM8	895;894;949;949;869;882;899;933	A0A0A6YWR8	A0A0A6YWR8	Mitogen-activated protein kinase kinase kinase kinase 4	Map4k4		1	80.945	3.43768e-15	95.651	87.069	93.823	0.999999	61.6281	4.02335e-07	66.533	0.999434	37.5821	3.13124e-07	54.658	1	75.9698	2.34398e-07	84.566	1	67.5582	1.91397e-05	73.834	1	64.7595	2.51718e-05	79.771	0.998641	33.7816	1.94759e-05	47.237	0.998366	32.8174	8.26573e-06	49.618	1	68.4329	2.7434e-05	81.311	0	0		NaN	1
A0A0A6YWR8;P97820;E9PVG7;A0A0A6YW53;B7ZNR9;B2RUE8;F8VPL5;A0A0A6YWM8;A0A0A6YWJ2	688;687;742;742;665;611;695;665;100	A0A0A6YWR8	A0A0A6YWR8	Mitogen-activated protein kinase kinase kinase kinase 4	Map4k4		0.329289	0	1.04546e-16	56.952	48.261	50.253					0.329289	0	1.26654e-11	50.253													0.313322	0	1.04546e-16	56.952	0.327484	0	8.06419e-08	42.863	0	0		NaN
A0A0A6YWR8;P97820;E9PVG7;A0A0A6YW53;B7ZNR9;B2RUE8;F8VPL5;A0A0A6YWM8;A0A0A6YWJ2	690;689;744;744;667;613;697;667;102	A0A0A6YWR8	A0A0A6YWR8	Mitogen-activated protein kinase kinase kinase kinase 4	Map4k4		0.329289	0	1.04546e-16	56.952	48.261	50.253					0.329289	0	1.26654e-11	50.253													0.313322	0	1.04546e-16	56.952	0.327484	0	8.06419e-08	42.863	0	0		NaN
A0A0A6YWR8;P97820;E9PVG7;A0A0A6YW53;B7ZNR9;B2RUE8;F8VPL5;A0A0A6YWM8;A0A0A6YWJ2	692;691;746;746;669;615;699;669;104	A0A0A6YWR8	A0A0A6YWR8	Mitogen-activated protein kinase kinase kinase kinase 4	Map4k4		0.329289	0	1.04546e-16	56.952	48.261	50.253					0.329289	0	1.26654e-11	50.253													0.313322	0	1.04546e-16	56.952	0.327484	0	8.06419e-08	42.863	0	0		NaN
A0A0A6YWR8;P97820;E9PVG7;A0A0A6YW53;B7ZNR9;B2RUE8;F8VPL5;A0A0A6YWM8;A0A0A6YWJ2;A0A0A6YXE5;A0A0A6YVR7	630;629;684;684;607;553;638;607;42;195;192	A0A0A6YWR8	A0A0A6YWR8	Mitogen-activated protein kinase kinase kinase kinase 4	Map4k4		1	94.3253	1.79867e-52	118.37	103.91	118.37	0.999988	49.3265	2.58623e-07	70.942	0.999994	52.1654	2.82289e-06	61.167					1	94.3253	1.79867e-52	118.37	0	0		NaN	0.999991	50.5495	2.59861e-07	70.917	0.999368	31.9888	1.85201e-05	47.754	0.999928	41.4126	2.3e-06	65.454
A0A0A6YWR8;P97820;E9PVG7;A0A0A6YW53;A0A0A6YXE5;A0A0A6YVR7	557;556;611;611;122;119	A0A0A6YWR8	A0A0A6YWR8	Mitogen-activated protein kinase kinase kinase kinase 4	Map4k4		0.963265	17.2114	0.00133452	56.359	47.596	56.359									0.963265	17.2114	0.00133452	56.359	0	0		NaN	0	0		NaN	0	0		NaN					0.864533	8.75242	0.00332217	50.292	0	0		NaN
A0A0A6YWR8;P97820;E9PVG7;A0A0A6YW53;A0A0A6YXE5;A0A0A6YVR7	562;561;616;616;127;124	A0A0A6YWR8	A0A0A6YWR8	Mitogen-activated protein kinase kinase kinase kinase 4	Map4k4		0.99709	25.8806	0.00082971	66.595	48.56	66.595													0.99709	25.8806	0.00082971	66.595	0	0		NaN	0	0		NaN									0	0		NaN
A0A0A6YWR8;P97820;E9PVG7;A0A0A6YW53;B7ZNR9;B2RUE8;F8VPL5;A0A0A6YWM8	847;846;901;901;821;834;851;885	A0A0A6YWR8	A0A0A6YWR8	Mitogen-activated protein kinase kinase kinase kinase 4	Map4k4		0.493376	0	6.1175e-05	71.176	58.549	71.176									0.493376	0	6.1175e-05	71.176	0.480322	0	0.000928395	55.258	0	0		NaN	0	0		NaN									0	0		NaN	0.433005
A0A0A6YWR8;P97820;E9PVG7;A0A0A6YW53;B7ZNR9;B2RUE8;F8VPL5;A0A0A6YWM8	848;847;902;902;822;835;852;886	A0A0A6YWR8	A0A0A6YWR8	Mitogen-activated protein kinase kinase kinase kinase 4	Map4k4		0.493376	0	6.1175e-05	71.176	58.549	71.176									0.493376	0	6.1175e-05	71.176	0.480322	0	0.000928395	55.258	0	0		NaN	0	0		NaN									0	0		NaN	0.433005
A0A0A6YWR8;P97820;E9PVG7;A0A0A6YW53;B7ZNR9;B2RUE8;F8VPL5;A0A0A6YWM8;A0A0A6YWJ2;A0A0A6YXE5;A0A0A6YVR7	620;619;674;674;597;543;628;597;32;185;182	A0A0A6YWR8	A0A0A6YWR8	Mitogen-activated protein kinase kinase kinase kinase 4	Map4k4		0.488074	0	0.00236822	48.659	36.793	47.189									0	0		NaN	0.488074	0	0.00276305	47.189					0	0		NaN					0.486132	0	0.00236822	48.659					0
A0A0A6YWR8;P97820;E9PVG7;A0A0A6YW53;B7ZNR9;B2RUE8;F8VPL5;A0A0A6YWM8;A0A0A6YWJ2;A0A0A6YXE5;A0A0A6YVR7	622;621;676;676;599;545;630;599;34;187;184	A0A0A6YWR8	A0A0A6YWR8	Mitogen-activated protein kinase kinase kinase kinase 4	Map4k4		0.488074	0	0.00236822	48.659	36.793	47.189									0	0		NaN	0.488074	0	0.00276305	47.189					0	0		NaN					0.486132	0	0.00236822	48.659					0
E9Q9M5;A0A0A6YWX1;J3KMM1;Q3UJD6-2;Q3UJD6	220;221;221;220;220	E9Q9M5	E9Q9M5	Ubiquitin carboxyl-terminal hydrolase;Ubiquitin carboxyl-terminal hydrolase 19	Usp19		1	94.0808	4.4604e-145	122.92	117.66	122.92	0.999834	38.9269	1.95541e-23	62.966	0.996873	25.511	3.31225e-23	62.489	0.999034	31.6273	5.47857e-17	56.69	1	94.0808	4.4604e-145	122.92	0.999466	35.298	9.37212e-23	60.361					0.996084	24.6763	1.84723e-16	54.913	0.999992	51.7064	3.66163e-51	80.125	0.998642	31.3791	1.01194e-16	56.055	0.999932
A0A0A6YX02;Q9CQ22	26;26	A0A0A6YX02	A0A0A6YX02	Ragulator complex protein LAMTOR1	Lamtor1		0.323164	0	1.31972e-05	81.865	40.582	71.223									0.321397	0	0.0140028	47.823	0.321437	0	0.000223831	69.979					0.323164	0	0.000120145	71.223	0.322239	0	1.31972e-05	81.865	0.31911	0	0.00352379	48.004	0	0		NaN	0.321089
A0A0A6YX02;Q9CQ22	27;27	A0A0A6YX02	A0A0A6YX02	Ragulator complex protein LAMTOR1	Lamtor1		0.323164	0	1.31972e-05	81.865	40.582	71.223									0.321397	0	0.0140028	47.823	0.321437	0	0.000223831	69.979					0.323164	0	0.000120145	71.223	0.322239	0	1.31972e-05	81.865	0.31911	0	0.00352379	48.004	0	0		NaN	0.321089
A0A0A6YX50;P51175	49;49	A0A0A6YX50	A0A0A6YX50	Protoporphyrinogen oxidase	Ppox		1	61.4352	0.000389148	61.435	53.51	61.435	0	0		NaN									0	0		NaN					0	0		NaN	0	0		NaN	0	0		NaN					0
A0A0A6YX73;Q8K1M3;P12367	97;97;96	A0A0A6YX73	A0A0A6YX73	cAMP-dependent protein kinase type II-alpha regulatory subunit	Prkar2a		0.999866	38.7366	4.9928e-15	74.763	70.411	72.569					0.999637	34.3937	4.9928e-15	74.763	0.997409	25.8541	3.59199e-07	51.398	0.995117	23.0914	1.35733e-13	69.444	0.99952	33.1815	1.38241e-13	69.435	0.996528	24.5796	2.12694e-14	70.465	0.873161	8.37842	0.000133262	40.179	0.997264	25.6162	1.33004e-14	72.569	0.997763	26.4938	8.36864e-11	61.109	0.999866
B5BNW2;A0A0A6YXE4;Q9CZM9	6;6;6	B5BNW2	B5BNW2	Calcium-activated potassium channel subunit beta-2	Kcnmb2		0.311801	0	0.00229977	41.401	29.424	41.401									0.311801	0	0.00229977	41.401					0	0		NaN					0	0		NaN	0	0		NaN	0	0		NaN
A0A0A6YXG0;Q9JKK1-2;Q9JKK1	2;2;2	A0A0A6YXG0	A0A0A6YXG0	Syntaxin-6	Stx6		1	77.379	7.31151e-10	115.78	102.2	77.379	1	88.6806	7.74194e-07	88.681	1	77.379	5.79631e-05	77.379	1	98.9426	2.97624e-07	98.943	1	105.975	1.87503e-07	105.98	1	94.6921	2.62155e-07	94.692	1	115.781	7.31151e-10	115.78					1	98.9426	2.97624e-07	98.943	1	77.379	5.79631e-05	77.379	1
E9PWX8;E9QPR4;A0A0A6YXG1;Q811L6	2357;2372;2382;2549	E9PWX8	E9PWX8	Microtubule-associated serine/threonine-protein kinase 4	Mast4		0.999423	32.4906	2.21372e-08	91.914	68.688	71.241	0.998212	27.4734	6.62235e-05	72.089	0.997885	26.7815	5.51714e-05	70.089	0.998868	29.4724	7.5504e-05	77.185	0.995239	23.2496	0.000214681	64.65	0.998585	28.5546	7.97144e-05	69.03	0.998445	28.098	6.62235e-05	72.089	0.998246	27.59	7.10242e-05	72.958	0.997257	25.643	6.96258e-05	72.705	0.999423	32.4906	6.15351e-05	71.241	0.998953
E9PWX8;E9QPR4;A0A0A6YXG1;Q811L6	1273;1288;1298;1465	E9PWX8	E9PWX8	Microtubule-associated serine/threonine-protein kinase 4	Mast4		0.917735	10.475	3.15375e-05	63.727	50.59	63.727	0.917735	10.475	3.15375e-05	63.727									0.901443	9.61249	0.000970835	43.791																	0.90862	9.9753	0.000214876	53.967	0.5
E9PWX8;E9QPR4;A0A0A6YXG1;Q811L6	1225;1240;1250;1417	E9PWX8	E9PWX8	Microtubule-associated serine/threonine-protein kinase 4	Mast4		0.898326	9.46224	0.0049461	40.352	16.923	40.352					0	0		NaN					0.898326	9.46224	0.0049461	40.352	0	0		NaN													0	0		NaN
E9PWX8;E9QPR4;A0A0A6YXG1;Q811L6;F7AIF3;E9Q6G0;E9Q4Q9;E9Q1M8;Q811L6-2	54;66;79;246;61;39;54;246;246	E9PWX8	E9PWX8	Microtubule-associated serine/threonine-protein kinase 4	Mast4		0.994803	22.9168	3.42767e-06	62.765	45.617	62.765					0	0		NaN					0.994803	22.9168	3.42767e-06	62.765					0.892627	9.26875	5.66984e-06	51.606	0	0		NaN					0	0		NaN	0
E9PWX8;E9QPR4;A0A0A6YXG1;Q811L6;B1AST8;B1AST7;E9QLW6;E9Q1Q1;Q60592;Q9R1L5	1244;1259;1269;1436;1336;1342;1397;1403;1337;1260	E9PWX8;B1AST8;Q9R1L5	B1AST8	Microtubule-associated serine/threonine-protein kinase 4;Microtubule-associated serine/threonine-protein kinase 2;Microtubule-associated serine/threonine-protein kinase 1	Mast4;Mast2;Mast1		0.999992	51.1626	0.00033067	67.456	40.326	62.088	0.999964	44.3884	0.000809639	67.456	0.999718	35.4971	0.00132108	51.875	0.999256	31.284	0.0041877	43.604	0.998446	28.0793	0.00242458	46.069	0.999608	34.067	0.00257871	48.004	0.986048	18.4925	0.0264831	46.891	0.997328	25.7195	0.00480852	50.354	0.999768	36.3367	0.000381806	60.628	0	0		NaN	0.99984
E9PWX8;E9QPR4;A0A0A6YXG1;Q811L6	1176;1191;1201;1368	E9PWX8	E9PWX8	Microtubule-associated serine/threonine-protein kinase 4	Mast4		0.999561	33.5765	4.89921e-12	99.5	34.95	79.492	0.998639	28.6542	4.89921e-12	98.105	0.996706	24.808	2.17661e-08	91.961	0	0		NaN	0.962676	14.1149	8.31612e-05	76.522	0.939575	11.9172	5.51714e-05	70.089	0.980665	17.0517	1.37281e-05	83.314	0.999561	33.5765	4.88182e-05	79.492	0	0		NaN	0	0		NaN	0.994833
E9PWX8;E9QPR4;A0A0A6YXG1;Q811L6	2325;2340;2350;2517	E9PWX8	E9PWX8	Microtubule-associated serine/threonine-protein kinase 4	Mast4		0.997871	26.8181	0.00346573	76.17	57.439	70.1	0.950307	12.8165	0.0061078	66.568	0.997865	26.7052	0.00509124	70.908	0.970563	15.1821	0.0048711	71.614	0.978924	16.67	0.00446077	72.928	0.981721	17.6054	0.0281872	43.651	0.997203	25.5404	0.00509124	70.908	0.991505	20.6819	0.00534356	70.1	0.892844	9.20776	0.00346573	76.17	0.991556	20.7407	0.0113798	55.461	0.997871
E9PWX8;E9QPR4;A0A0A6YXG1;Q811L6	1098;1113;1123;1290	E9PWX8	E9PWX8	Microtubule-associated serine/threonine-protein kinase 4	Mast4		0.911367	11.4781	2.03696e-08	65.438	56.729	65.438	0	0		NaN	0	0		NaN	0	0		NaN	0	0		NaN									0	0		NaN	0.805005	7.15808	1.10395e-05	45.395	0	0		NaN	0.911367
E9PWX8;E9QPR4;A0A0A6YXG1;Q811L6	1099;1114;1124;1291	E9PWX8	E9PWX8	Microtubule-associated serine/threonine-protein kinase 4	Mast4		0.316546	0	6.05756e-05	40.515	29.727	40.515	0	0		NaN	0	0		NaN	0	0		NaN	0	0		NaN									0	0		NaN					0	0		NaN
E9PWX8;E9QPR4;A0A0A6YXG1;Q811L6	1102;1117;1127;1294	E9PWX8	E9PWX8	Microtubule-associated serine/threonine-protein kinase 4	Mast4		0.316546	0	6.05756e-05	40.515	29.727	40.515	0	0		NaN	0	0		NaN	0	0		NaN	0	0		NaN									0	0		NaN					0	0		NaN
E9PWX8;E9QPR4;A0A0A6YXG1;Q811L6	1203;1218;1228;1395	E9PWX8	E9PWX8	Microtubule-associated serine/threonine-protein kinase 4	Mast4		0.994222	22.5744	0.000389964	49.049	41.308	49.049					0	0		NaN					0	0		NaN					0	0		NaN	0.994222	22.5744	0.000389964	49.049	0	0		NaN	0	0		NaN	0
E9PWX8;E9QPR4;A0A0A6YXG1;Q811L6	1197;1212;1222;1389	E9PWX8	E9PWX8	Microtubule-associated serine/threonine-protein kinase 4	Mast4		0.499957	0	1.22501e-12	99.011	72.627	86.467	0	0		NaN	0	0		NaN	0.499957	0	1.46121e-05	86.467	0.499859	0	1.22501e-12	99.011	0.499846	0	0.00139969	62.088	0	0		NaN	0	0		NaN	0.499942	0	0.000256406	73.848	0	0		NaN	0.498106
Q5FWX7;E9Q6C1;F6UHR6;E9PXZ2;A0A0A6YXH3;A2A8Z1-2;A2A8Z1	207;237;300;304;327;220;317	Q5FWX7	Q5FWX7	Oxysterol-binding protein;Oxysterol-binding protein-related protein 9	Osbpl9		0.182316	0	1.14175e-10	57.61	36.604	57.61	0	0		NaN													0.182316	0	1.14175e-10	57.61
Q5FWX7;E9Q6C1;F6UHR6;E9PXZ2;A0A0A6YXH3;A2A8Z1-2;A2A8Z1	209;239;302;306;329;222;319	Q5FWX7	Q5FWX7	Oxysterol-binding protein;Oxysterol-binding protein-related protein 9	Osbpl9		0.232213	0.47245	1.08586e-14	70.091	39.122	70.091	0	0		NaN									0.232213	0.47245	1.08586e-14	70.091	0.182316	0	1.14175e-10	57.61
Q5FWX7;E9Q6C1;F6UHR6;E9PXZ2;A0A0A6YXH3;A2A8Z1-2;A2A8Z1	214;244;307;311;334;227;324	Q5FWX7	Q5FWX7	Oxysterol-binding protein;Oxysterol-binding protein-related protein 9	Osbpl9		0.403988	1.44659	1.39603e-61	109.23	69.99	109.23	0	0		NaN	0.322049	0	1.04268e-18	79.942									0.403988	1.44659	1.39603e-61	109.23	0.322751	0	9.44654e-24	83.251					0.26873	0	6.81245e-32	94.08	0.333656	0	1.10479e-23	82.36
Q5FWX7;E9Q6C1;F6UHR6;E9PXZ2;A0A0A6YXH3;A2A8Z1-2;A2A8Z1	215;245;308;312;335;228;325	Q5FWX7	Q5FWX7	Oxysterol-binding protein;Oxysterol-binding protein-related protein 9	Osbpl9		0.562349	2.16605	7.84194e-63	113.13	103.15	96.887	0.461758	0	1.66208e-40	99.148	0.322049	0	1.04268e-18	79.942					0.562349	2.16605	3.76681e-40	96.887					0.322751	0	9.44654e-24	83.251	0.424787	0	1.28493e-24	87.792	0.26873	0	6.81245e-32	94.08	0.333656	0	1.10479e-23	82.36	0.418415
Q5FWX7;E9Q6C1;F6UHR6;E9PXZ2;A0A0A6YXH3;A2A8Z1-2;A2A8Z1	216;246;309;313;336;229;326	Q5FWX7	Q5FWX7	Oxysterol-binding protein;Oxysterol-binding protein-related protein 9	Osbpl9		0.777668	7.11445	4.54766e-74	117.08	106.96	117.08	0.461758	0	1.66208e-40	99.148	0.322049	0	1.04268e-18	79.942	0.62487	5.67991	1.57057e-18	78.752									0.322751	0	9.44654e-24	83.251	0.424787	0	1.28493e-24	87.792	0.777668	7.11445	4.54766e-74	117.08	0.307271	0	1.10479e-23	82.36	0.418415
Q5FWX7;E9Q6C1;F6UHR6;E9PXZ2;A0A0A6YXH3;A2A8Z1-2;A2A8Z1	219;249;312;316;339;232;329	Q5FWX7	Q5FWX7	Oxysterol-binding protein;Oxysterol-binding protein-related protein 9	Osbpl9		0.268424	0.980834	3.92845e-11	61.602	38.965	61.602	0	0		NaN	0.229193	0	1.20784e-05	44.711
Q3TQS1;F6U5V1;A0A0A6YXJ7	60;60;42	Q3TQS1	Q3TQS1		Larp1b		0.999812	38.6822	1.20671e-81	136.26	121.06	136.26	0.998906	29.813	7.93069e-34	100.77	0.996975	26.269	2.69337e-08	68.129	0.984	21.0176	8.93897e-08	61.102	0.999812	38.6822	1.20671e-81	136.26	0.99739	25.8508	1.38025e-50	108.56	0.99846	29.2149	7.93069e-34	100.77	0.997907	26.799	9.03557e-51	110.22	0	0		NaN	0.99808	28.5783	2.8514e-09	70.96	0.999132
A0A1D5RM41;A0A0A6YXX3;A0A0A6YXL6;E9Q3Y4;Q9ESE1-3;Q9ESE1-2;Q9ESE1	999;999;999;999;999;999;999	A0A1D5RM41	A0A1D5RM41	Lipopolysaccharide-responsive and beige-like anchor protein	Lrba		0.520111	0.357526	9.30648e-06	47.018	38.628	47.018	0.519228	0.380006	1.57914e-05	41.136									0.51775	0.32417	1.61934e-05	40.428																					0.520111
A0A1D5RM41;A0A0A6YXX3;A0A0A6YXL6;E9Q3Y4;Q9ESE1-3;Q9ESE1-2;Q9ESE1	1000;1000;1000;1000;1000;1000;1000	A0A1D5RM41	A0A1D5RM41	Lipopolysaccharide-responsive and beige-like anchor protein	Lrba		0.782743	5.75809	2.22214e-07	53.089	44.042	53.089																	0.782743	5.75809	2.22214e-07	53.089
A0A1D5RM41;A0A0A6YXX3;A0A0A6YXL6;E9Q3Y4;Q9ESE1-3;Q9ESE1-2;Q9ESE1	971;971;971;971;971;971;971	A0A1D5RM41	A0A1D5RM41	Lipopolysaccharide-responsive and beige-like anchor protein	Lrba		0.433938	0	2.81135e-05	43.068	37.288	43.068					0	0		NaN					0	0		NaN	0	0		NaN	0	0		NaN					0	0		NaN
A0A1D5RM41;A0A0A6YXX3;A0A0A6YXL6;E9Q3Y4;Q9ESE1-3;Q9ESE1-2;Q9ESE1	979;979;979;979;979;979;979	A0A1D5RM41	A0A1D5RM41	Lipopolysaccharide-responsive and beige-like anchor protein	Lrba		0.999909	40.5622	2.11777e-07	64.394	57.665	64.394	0.999909	40.5622	2.11777e-07	64.394	0.999354	32.0094	0.000355612	55.841					0.903201	9.70713	0.000880239	49.216	0	0		NaN	0.999526	33.4961	0.000248086	57.328					0.998114	27.3385	0.000168422	61.641	0.772711	6.37627	5.00615e-07	51.119	0.997055
A0A1D5RM41;A0A0A6YXX3;A0A0A6YXL6;E9Q3Y4;Q9ESE1-3;Q9ESE1-2;Q9ESE1	1763;1763;1763;1763;1764;1764;1764	A0A1D5RM41	A0A1D5RM41	Lipopolysaccharide-responsive and beige-like anchor protein	Lrba		0.234695	0	8.14403e-15	46.608	42.031	41.749					0.234695	0	8.56005e-11	41.749	0.230613	0	8.14403e-15	46.608
A0A1D5RM41;A0A0A6YXX3;A0A0A6YXL6;E9Q3Y4;Q9ESE1-3;Q9ESE1-2;Q9ESE1	1769;1769;1769;1769;1770;1770;1770	A0A1D5RM41	A0A1D5RM41	Lipopolysaccharide-responsive and beige-like anchor protein	Lrba		0.489226	5.70425	4.3583e-48	72.569	68.151	72.569									0.230613	0	8.14403e-15	46.608	0.489226	5.70425	4.3583e-48	72.569
A0A1D5RM41;A0A0A6YXX3;A0A0A6YXL6;E9Q3Y4	1115;1115;1115;1115	A0A1D5RM41	A0A1D5RM41		Lrba		0.824243	6.77246	3.93849e-48	89.565	81.9	60.181					0.644875	2.68446	2.14041e-20	63.913	0.684527	3.36749	5.72393e-41	87.948	0.46202	0	8.1116e-15	61.101	0.787475	6.38773	2.08454e-28	72.841	0.594813	1.69383	6.72975e-29	75.035	0.499003	0	3.93849e-48	89.565	0.824243	6.77246	1.10358e-14	60.181					0.487987
A0A0A6YXS4;P24547	134;159	A0A0A6YXS4	A0A0A6YXS4	Inosine-5'-monophosphate dehydrogenase 2	Impdh2		0.5	0	0.00296019	80.231	6.9979	65.224	0.5	0	0.0116875	54.982	0.5	0	0.00638931	65.224					0.5	0	0.0099224	57.785					0.5	0	0.0132288	52.579	0.5	0	0.00305443	79.474					0.5	0	0.00638931	65.224	0.5
A0A0A6YXS4;P24547	135;160	A0A0A6YXS4	A0A0A6YXS4	Inosine-5'-monophosphate dehydrogenase 2	Impdh2		0.918012	10.491	0.00107374	103.55	19.599	70.399	0.5	0	0.0116875	54.982	0.5	0	0.00638931	65.224	0.918012	10.491	0.00525038	70.399	0.5	0	0.0099224	57.785	0.702489	3.73135	0.00107374	103.55	0.5	0	0.0132288	52.579	0.5	0	0.00305443	79.474	0.832479	6.96303	0.00436554	73.233	0.5	0	0.00638931	65.224	0.5
A0A0A6YY66;Q8BSN6;O70480	30;30;30	A0A0A6YY66	A0A0A6YY66	Vesicle-associated membrane protein 4	Vamp4		1	45.6175	2.46623e-75	152.89	128.33	45.618	1	102.277	1.46209e-26	102.28	1	102.277	1.46209e-26	102.28	1	55.1732	5.06495e-05	55.173	1	45.8637	0.000161316	45.864	1	98.3535	1.23348e-19	98.353	1	65.3952	9.98062e-05	65.395	1	88.441	2.48164e-12	88.441	0	0		NaN	1	92.9346	1.93453e-14	92.935	1
A0A0A6YY67;H7BX08;Q8C1B1;Q8C1B1-2;A0A0A6YXV8	1003;1009;992;992;336	A0A0A6YY67	A0A0A6YY67	Calmodulin-regulated spectrin-associated protein 2	Camsap2		0.836218	7.089	0.00150335	42.095	24.884	42.095	0.815461	6.49899	0.00175818	40.801					0	0		NaN	0	0		NaN	0	0		NaN									0	0		NaN	0	0		NaN	0
A0A0A6YY67;H7BX08;Q8C1B1;Q8C1B1-2;A0A0A6YXV8	1294;1300;1283;1292;636	A0A0A6YY67	A0A0A6YY67	Calmodulin-regulated spectrin-associated protein 2	Camsap2		0.536773	0.641137	0.0175126	45.257	35.025	45.257																					0	0		NaN
A0A0A6YY67;H7BX08;Q8C1B1;Q8C1B1-2;A0A0A6YXV8	1296;1302;1285;1294;638	A0A0A6YY67	A0A0A6YY67	Calmodulin-regulated spectrin-associated protein 2	Camsap2		0.856592	7.80299	0.00482434	42.809	27.147	42.809																					0	0		NaN
A0A0A6YY67;H7BX08;Q8C1B1;Q8C1B1-2	400;406;389;389	A0A0A6YY67	A0A0A6YY67	Calmodulin-regulated spectrin-associated protein 2	Camsap2		0.205921	0	0.000463761	46.592	32.686	46.592																					0	0		NaN									0	0		NaN
A0A0A6YY67;H7BX08;Q8C1B1;Q8C1B1-2	401;407;390;390	A0A0A6YY67	A0A0A6YY67	Calmodulin-regulated spectrin-associated protein 2	Camsap2		0.205921	0	0.000463761	46.592	32.686	46.592																					0	0		NaN									0	0		NaN
A0A0A6YY67;H7BX08;Q8C1B1;Q8C1B1-2	402;408;391;391	A0A0A6YY67	A0A0A6YY67	Calmodulin-regulated spectrin-associated protein 2	Camsap2		0.205921	0	0.000463761	46.592	32.686	46.592																					0	0		NaN									0	0		NaN
A0A0A6YY67;H7BX08;Q8C1B1;Q8C1B1-2	404;410;393;393	A0A0A6YY67	A0A0A6YY67	Calmodulin-regulated spectrin-associated protein 2	Camsap2		0.205921	0	0.000463761	46.592	32.686	46.592																					0	0		NaN									0	0		NaN
A0A0A6YY67;H7BX08;Q8C1B1;Q8C1B1-2	450;456;439;439	A0A0A6YY67	A0A0A6YY67	Calmodulin-regulated spectrin-associated protein 2	Camsap2		0.994528	22.5949	4.33521e-13	95.981	79.757	95.981	0	0		NaN	0	0		NaN	0	0		NaN	0	0		NaN	0.947785	12.6006	0.000104649	64.244	0	0		NaN	0	0		NaN	0	0		NaN	0	0		NaN	0
E9Q2S0;A0A0A6YY83;A0A0G2JG16;A0A0A6YW34;A0A0A6YY48;A2RS43	1011;1011;35;326;672;1011	E9Q2S0	E9Q2S0		Pcdh7		0.870154	8.41602	2.76204e-05	42.325	32.667	42.325									0.870154	8.41602	2.93414e-05	42.325																	0.728706	4.87346	2.76204e-05	40.533
E9Q2S0;A0A0A6YY83;A0A0G2JG16;A0A0A6YW34;A0A0A6YY48;A2RS43	982;982;6;297;643;982	E9Q2S0	E9Q2S0		Pcdh7		0.999997	55.0077	5.42879e-05	67.964	53.757	67.964	0	0		NaN	0	0		NaN	0	0		NaN	0	0		NaN	0	0		NaN	0	0		NaN	0	0		NaN	0	0		NaN	0	0		NaN	0
E9Q2S0;A0A0A6YY83;A0A0G2JG16;A0A0A6YW34;A0A0A6YY48;A2RS43	989;989;13;304;650;989	E9Q2S0	E9Q2S0		Pcdh7		1	77.6912	2.36995e-17	103.76	91.714	94.717	1	67.5547	2.02876e-05	79.614	0.999989	49.7722	4.25546e-05	68.83	0.99988	39.2215	6.41598e-05	67.234	1	73.3995	7.32137e-09	91.812	0.999999	62.8493	1.89043e-05	79.875	1	67.5407	3.86564e-06	84.566	1	86.7357	2.36995e-17	103.76	0.999926	41.3319	3.55871e-05	69.345	1	79.4385	3.91268e-13	96.464	1
E9Q2S0;A0A0A6YY83	1235;1243	E9Q2S0	E9Q2S0		Pcdh7		0.946592	14.4005	0.00112692	45.79	41.822	45.79					0	0		NaN	0	0		NaN									0	0		NaN					0.919604	13.1748	0.00183465	40.941					0.946592
A0A0A6YY91;P13595;A0A0A6YY47;E9QB01;P13595-2	744;770;770;771;770	A0A0A6YY91	A0A0A6YY91	Neural cell adhesion molecule 1	Ncam1		0.553712	0.93668	0.000152717	51.819	38.589	51.819					0	0		NaN	0	0		NaN	0	0		NaN	0	0		NaN					0	0		NaN	0	0		NaN	0	0		NaN	0
A0A0A6YY91;P13595	932;958	A0A0A6YY91	A0A0A6YY91	Neural cell adhesion molecule 1	Ncam1		0.8024	9.42363	1.76731e-08	46.32	39.956	46.32													0	0		NaN	0	0		NaN																	0.8024
A0A0A6YY91;P13595	858;884	A0A0A6YY91	A0A0A6YY91	Neural cell adhesion molecule 1	Ncam1		0.234816	0	0.00321669	40.715	24.836	40.715									0	0		NaN					0	0		NaN					0	0		NaN					0.234816	0	0.00321669	40.715
A0A0A6YY91;P13595	859;885	A0A0A6YY91	A0A0A6YY91	Neural cell adhesion molecule 1	Ncam1		0.311531	0	1.30734e-05	74.841	52.2	74.841									0	0		NaN	0.311531	0	1.30734e-05	74.841	0	0		NaN					0	0		NaN					0.234816	0	0.00321669	40.715
A0A0A6YY91;P13595	860;886	A0A0A6YY91	A0A0A6YY91	Neural cell adhesion molecule 1	Ncam1		0.410249	0	1.30734e-05	74.841	52.2	69.65					0.404438	0	7.96352e-05	67.113	0	0		NaN	0.311531	0	1.30734e-05	74.841	0	0		NaN					0	0		NaN	0.313957	0	0.000112652	65.043	0.234816	0	0.00321669	40.715
A0A0A6YY91;P13595	861;887	A0A0A6YY91	A0A0A6YY91	Neural cell adhesion molecule 1	Ncam1		0.410249	0	1.30734e-05	74.841	52.2	69.65					0.404438	0	7.96352e-05	67.113	0	0		NaN	0.311531	0	1.30734e-05	74.841	0	0		NaN					0	0		NaN	0.313957	0	0.000112652	65.043	0.234816	0	0.00321669	40.715
A0A0A6YY91;P13595	979;1005	A0A0A6YY91	A0A0A6YY91	Neural cell adhesion molecule 1	Ncam1		0.985902	18.4469	3.68362e-05	74.789	63.884	60.657	0.985902	18.4469	0.000265315	60.657	0	0		NaN					0	0		NaN	0	0		NaN	0	0		NaN									0	0		NaN	0
A0A0B4J1E2;Q9CSN1	224;224	A0A0B4J1E2	A0A0B4J1E2	SNW domain-containing protein 1	Snw1		0.999999	60.6071	1.58177e-10	83.253	78.862	83.253	0.999998	58.5109	2.14508e-08	81.157	0.999999	60.6071	1.58177e-10	83.253	0.999784	38.2586	0.000260095	47.082	0.999673	36.0266	8.33873e-05	58.672	0.999566	35.1886	0.00024488	47.68	0.999994	53.3831	1.04546e-07	76.713	0.999959	45.2784	8.55539e-05	62.203	0.999982	48.6232	5.30118e-05	66.779
A0A0G2JDC3;E9Q2V5;Q3UTZ3	248;517;517	A0A0G2JDC3	A0A0G2JDC3	Uncharacterized protein C7orf43 homolog	BC037034		0.980781	17.6669	0.000427248	64.55	53.399	62.924	0	0		NaN									0.849741	7.53106	0.000427248	64.55					0	0		NaN					0.980781	17.6669	0.000518877	62.924
Q0P6A0;A0A0G2JGC2;A0A0G2JFV3;A0A0G2JDE3;A0A0G2JG66;A0A0G2JDF4;A0A0G2JFF5;A0A0G2JDK6;A0A0G2JGM8;Q8JZZ7;Q8JZZ7-2	154;386;1256;1318;1350;1367;1382;1393;1402;1402;1466	Q0P6A0	Q0P6A0	Latrophilin-2	Adgrl2;Lphn2		0.969977	15.0966	3.38771e-09	94.465	54.42	88.596	0.870005	8.28084	7.33738e-05	73.781	0.826779	7.32643	0.00399839	46.592	0.9587	13.702	3.38771e-09	94.465	0.969977	15.0966	8.0487e-08	88.596	0.94765	12.6238	2.82653e-05	77.062	0.711538	3.93134	5.17944e-05	74.962	0.957874	13.5691	4.47932e-08	91.313	0.969126	14.9839	2.58766e-06	87.184	0.947906	12.6238	2.82653e-05	77.062	0.868696
Q0P6A0;A0A0G2JGC2;A0A0G2JFV3;A0A0G2JDE3;A0A0G2JG66;A0A0G2JDF4;A0A0G2JFF5;A0A0G2JDK6;A0A0G2JGM8;Q8JZZ7;Q8JZZ7-2	210;442;1312;1374;1406;1423;1438;1449;1458;1458;1522	Q0P6A0	Q0P6A0	Latrophilin-2	Adgrl2;Lphn2		1	71.3218	2.2255e-51	114.76	99.888	114.76	0	0		NaN					0	0		NaN	0.999964	44.3866	6.82405e-05	77.813	0.978568	16.5952	0.00373848	44.367					0.999884	39.3681	0.000538555	59.13					0	0		NaN	1
Q0P6A0;A0A0G2JGC2;A0A0G2JFV3;A0A0G2JDE3;A0A0G2JG66;A0A0G2JDF4;A0A0G2JFF5;A0A0G2JDK6;A0A0G2JGM8;Q8JZZ7;Q8JZZ7-2	189;421;1291;1353;1385;1402;1417;1428;1437;1437;1501	Q0P6A0	Q0P6A0	Latrophilin-2	Adgrl2;Lphn2		1	43.2819	0.0111171	43.282	31.871	43.282	1	43.2819	0.0111171	43.282	0	0		NaN	0	0		NaN	0	0		NaN	0	0		NaN					0	0		NaN					0	0		NaN	0
A0A0G2JDI4;H3BJA3;O09172	59;28;59	A0A0G2JDI4	A0A0G2JDI4	Glutamate--cysteine ligase regulatory subunit	Gclm		0.99999	49.9808	2.71115e-67	150.59	122.82	139.6	0.999922	41.2031	6.77051e-52	133.66	0.999539	33.5022	4.79967e-27	106.52	0.996443	24.4919	3.76617e-45	122.93	0.99975	37.0241	1.05202e-39	118.33	0.999937	42.2252	3.76617e-45	122.93	0.99824	28.0271	2.5848e-26	103.79					0.99999	49.9808	1.12614e-57	139.6	0.999716	35.6835	1.05202e-39	118.33	0.999956
A0A0G2JDP8;Q8BH34	11;11	A0A0G2JDP8	A0A0G2JDP8	Semaphorin-3D	Sema3d		0.999946	42.7125	0.0111901	59.245	9.8271	59.245																									0	0		NaN	0	0		NaN	0.999946	42.7125	0.0111901	59.245
A0A0G2JES4;A0A0G2JFI7;A0A0G2JEC3;A0A0G2JE18;A0A0G2JDQ1;A0A0G2JDT0;A0A0G2JEC2;A0A0H2UKB6;A0A0H2UH28;Q8CFN5-4;Q8CFN5-3;Q8CFN5-2;Q8CFN5-5;Q8CFN5	179;179;49;133;181;133;181;179;199;179;181;181;179;181	A0A0G2JES4	A0A0G2JES4	Myocyte-specific enhancer factor 2C	Mef2c		0.199226	0	3.44274e-14	42.661	33.596	42.661													0	0		NaN					0.199226	0	3.44274e-14	42.661													0
A0A0G2JES4;A0A0G2JFI7;A0A0G2JEC3;A0A0G2JE18;A0A0G2JDQ1;A0A0G2JDT0;A0A0G2JEC2;A0A0H2UKB6;A0A0H2UH28;Q8CFN5-4;Q8CFN5-3;Q8CFN5-2;Q8CFN5-5;Q8CFN5	181;181;51;135;183;135;183;181;201;181;183;183;181;183	A0A0G2JES4	A0A0G2JES4	Myocyte-specific enhancer factor 2C	Mef2c		0.199226	0	3.44274e-14	42.661	33.596	42.661													0	0		NaN					0.199226	0	3.44274e-14	42.661													0
A0A0G2JES4;A0A0G2JFI7;A0A0G2JEC3;A0A0G2JE18;A0A0G2JDQ1;A0A0G2JDT0;A0A0G2JEC2;A0A0H2UKB6;A0A0H2UH28;Q8CFN5-4;Q8CFN5-3;Q8CFN5-2;Q8CFN5-5;Q8CFN5	190;190;60;144;192;144;192;190;210;190;192;192;190;192	A0A0G2JES4	A0A0G2JES4	Myocyte-specific enhancer factor 2C	Mef2c		0.199226	0	3.44274e-14	42.661	33.596	42.661													0	0		NaN					0.199226	0	3.44274e-14	42.661													0
A0A0G2JDU7;Q61553	38;38	A0A0G2JDU7	A0A0G2JDU7	Fascin	Fscn1		0.491808	0	0.00287808	73.841	41.728	73.841																													0.491808	0	0.00287808	73.841
A0A0G2JDU7;Q61553	39;39	A0A0G2JDU7	A0A0G2JDU7	Fascin	Fscn1		0.491808	0	0.00287808	73.841	41.728	73.841																													0.491808	0	0.00287808	73.841
A0A0H2UH17;A0A0G2JDV6;Q80X50-2;Q80X50-3;Q80X50-4;Q80X50;Q80X50-5;A0A0G2JFN7	859;859;890;859;879;879;884;381	A0A0H2UH17	A0A0H2UH17	Ubiquitin-associated protein 2-like	Ubap2l		0.884709	8.99002	5.88386e-05	70.197	44.259	65.472	0.775475	5.92623	0.000114725	68.283	0	0		NaN	0	0		NaN	0	0		NaN	0.884709	8.99002	0.000208149	65.472	0.8686	8.99571	0.000289569	56.527	0.7936	6.30333	5.88386e-05	70.197	0	0		NaN					0
A0A0H2UH17;A0A0G2JDV6;Q80X50-2;Q80X50-3;Q80X50-4;Q80X50;Q80X50-5	453;453;484;453;473;473;478	A0A0H2UH17	A0A0H2UH17	Ubiquitin-associated protein 2-like	Ubap2l		0.47299	0	6.11741e-60	78.228	69.893	61.938	0.468359	0	6.11741e-60	78.228	0.463792	0	1.61307e-37	66.386	0.462494	0	1.95381e-48	74.868	0.45063	0	1.95381e-48	74.868									0.461148	0	1.44476e-14	47.57	0.460645	0	2.89544e-48	74.284	0.440912	0	9.31431e-30	63.282	0.453323
A0A0H2UH17;A0A0G2JDV6;Q80X50-2;Q80X50-3;Q80X50-4;Q80X50;Q80X50-5	454;454;485;454;474;474;479	A0A0H2UH17	A0A0H2UH17	Ubiquitin-associated protein 2-like	Ubap2l		0.47299	0	6.11741e-60	78.228	69.893	61.938	0.468359	0	6.11741e-60	78.228	0.463792	0	1.61307e-37	66.386	0.462494	0	1.95381e-48	74.868	0.45063	0	1.95381e-48	74.868									0.461148	0	1.44476e-14	47.57	0.460645	0	2.89544e-48	74.284	0.440912	0	9.31431e-30	63.282	0.453323
A0A0H2UH17;A0A0G2JDV6;Q80X50-2;Q80X50-3;Q80X50-4;Q80X50;Q80X50-5	458;458;489;458;478;478;483	A0A0H2UH17	A0A0H2UH17	Ubiquitin-associated protein 2-like	Ubap2l		0.428787	1.80544	3.4195e-21	52.155	47.839	52.155									0.428787	1.80544	3.4195e-21	52.155
A0A0H2UH17;A0A0G2JDV6;Q80X50-2;Q80X50-3;Q80X50-4;Q80X50;Q80X50-5;A0A0G2JFN7	607;607;638;607;627;627;632;129	A0A0H2UH17	A0A0H2UH17	Ubiquitin-associated protein 2-like	Ubap2l		0.564249	2.97657	1.42648e-05	81.525	59.05	81.525	0	0		NaN	0	0		NaN	0.564249	2.97657	1.42648e-05	81.525	0.354277	1.4483	0.00338271	48.423	0.400422	1.26575	0.000908415	47.823	0.400422	1.26575	0.000908415	45.257	0	0		NaN	0.31296	0	0.00329461	56.258	0	0		NaN	0
A0A0H2UH17;A0A0G2JDV6;Q80X50-2;Q80X50-3;Q80X50-4;Q80X50;Q80X50-5;A0A0G2JFN7	608;608;639;608;628;628;633;130	A0A0H2UH17	A0A0H2UH17	Ubiquitin-associated protein 2-like	Ubap2l		0.462403	0	0.00236358	56.258	35.356	56.225	0	0		NaN	0.457376	0	0.00776161	47.198	0	0		NaN	0.326195	0	0.00338271	48.423	0.462403	0	0.00236358	56.225					0	0		NaN	0.31296	0	0.00329461	56.258	0	0		NaN	0
A0A0H2UH17;A0A0G2JDV6;Q80X50-2;Q80X50-3;Q80X50-4;Q80X50;Q80X50-5;A0A0G2JFN7	609;609;640;609;629;629;634;131	A0A0H2UH17	A0A0H2UH17	Ubiquitin-associated protein 2-like	Ubap2l		0.853847	8.48987	0.000138679	59.864	48.391	45.915	0.766552	5.85206	0.00443697	51.013	0.457376	0	0.00776161	47.198	0.704608	6.26471	0.00118925	43.69	0.326195	0	0.00338271	48.423	0.462403	0	0.00236358	56.225	0.850619	8.35172	0.00261874	55.549	0.851406	8.48987	0.000326382	53.491	0.853847	8.48987	0.000183996	57.414	0.664083	5.4866	0.00164468	41.378	0.505343
A0A0H2UH17;A0A0G2JDV6;Q80X50-2;Q80X50-3;Q80X50-4;Q80X50;Q80X50-5	412;412;443;412;432;432;437	A0A0H2UH17	A0A0H2UH17	Ubiquitin-associated protein 2-like	Ubap2l		0.350435	0	1.6589e-05	80.312	64.421	80.312	0	0		NaN	0	0		NaN	0	0		NaN	0	0		NaN					0	0		NaN	0.330681	0	0.00315388	44.425	0	0		NaN	0	0		NaN	0.350435
A0A0H2UH17;A0A0G2JDV6;Q80X50-2;Q80X50-3;Q80X50-4;Q80X50;Q80X50-5	416;416;447;416;436;436;441	A0A0H2UH17	A0A0H2UH17	Ubiquitin-associated protein 2-like	Ubap2l		0.996303	28.0911	2.23135e-18	107.74	91.854	88.155	0.989082	23.6019	5.48598e-06	82.908	0.994654	25.7491	5.48598e-06	82.908	0.956025	16.5323	3.86564e-06	84.566	0.944491	12.8472	1.19852e-08	89.959	0.870688	11.3474	3.86564e-06	84.566	0.996303	28.0911	3.59561e-07	88.155	0.330681	0	0.00315388	44.425	0.959848	16.8875	4.62467e-13	95.651	0.906132	14.3259	0.0003348	59.294	0.972073
A0A0H2UH17;A0A0G2JDV6;Q80X50-2;Q80X50-3;Q80X50-4;Q80X50;Q80X50-5	462;462;493;462;482;482;487	A0A0H2UH17	A0A0H2UH17	Ubiquitin-associated protein 2-like	Ubap2l		0.613569	6.21327	5.59679e-12	59.893	52.354	59.893	0	0		NaN	0.406345	3.64267	2.35723e-05	41.818	0.613569	6.21327	5.59679e-12	59.893									0.36604	1.16156	3.05708e-06	46.296	0.412648	4.81645	1.05857e-09	57.299	0	0		NaN	0.448526	3.1206	3.05708e-06	46.296
A0A0H2UH17;A0A0G2JDV6;Q80X50-2;Q80X50-3;Q80X50-4;Q80X50;Q80X50-5	467;467;498;467;487;487;492	A0A0H2UH17	A0A0H2UH17	Ubiquitin-associated protein 2-like	Ubap2l		0.621321	6.97565	7.25704e-13	63.165	55.453	51.234	0.499613	5.34795	1.30392e-05	43.523					0	0		NaN	0.367905	3.60613	6.75247e-06	44.541	0.525503	5.81481	7.25704e-13	63.165									0	0		NaN					0.621321
A0A0H2UH17;A0A0G2JDV6;Q80X50-2;Q80X50-3;Q80X50-4;Q80X50;Q80X50-5	470;470;501;470;490;490;495	A0A0H2UH17	A0A0H2UH17	Ubiquitin-associated protein 2-like	Ubap2l		0.269549	0	3.0653e-08	53.342	47.5	45.011	0	0		NaN					0	0		NaN																	0	0		NaN
A0A0H2UH17;A0A0G2JDV6;Q80X50-2;Q80X50-3;Q80X50-4;Q80X50;Q80X50-5	471;471;502;471;491;491;496	A0A0H2UH17	A0A0H2UH17	Ubiquitin-associated protein 2-like	Ubap2l		0.269549	0	3.0653e-08	53.342	47.5	45.011	0	0		NaN					0	0		NaN																	0	0		NaN
A0A0H2UH17;A0A0G2JDV6;Q80X50-2;Q80X50-3;Q80X50-4;Q80X50;Q80X50-5	475;475;506;475;495;495;500	A0A0H2UH17	A0A0H2UH17	Ubiquitin-associated protein 2-like	Ubap2l		0.284579	0	3.37297e-21	70.452	70.452	70.452	0.284579	0	3.37297e-21	70.452	0.266657	0	6.39133e-07	50.255	0	0		NaN					0.278749	0	4.00722e-19	69.779									0	0		NaN
A0A0H2UH17;A0A0G2JDV6;Q80X50-2;Q80X50-3;Q80X50-4;Q80X50;Q80X50-5	476;476;507;476;496;496;501	A0A0H2UH17	A0A0H2UH17	Ubiquitin-associated protein 2-like	Ubap2l		0.426726	0	3.92289e-23	76.015	67.828	74.525	0.284579	0	3.37297e-21	70.452	0.266657	0	6.39133e-07	50.255	0	0		NaN	0.326372	0	3.57105e-21	70.121	0.278749	0	4.00722e-19	69.779					0.408557	0	3.92289e-23	76.015	0.426726	0	9.32061e-22	74.525
A0A0H2UH17;A0A0G2JDV6;Q80X50-2;Q80X50-3;Q80X50-4;Q80X50;Q80X50-5	477;477;508;477;497;497;502	A0A0H2UH17	A0A0H2UH17	Ubiquitin-associated protein 2-like	Ubap2l		0.486692	4.23692	3.92289e-23	76.015	67.828	57.227	0.284579	0	3.37297e-21	70.452	0.266657	0	6.39133e-07	50.255	0.4055	4.77137	6.9206e-14	63.606	0.326372	0	3.57105e-21	70.121	0.278749	0	4.00722e-19	69.779	0.486692	4.23692	1.59952e-09	57.227	0.408557	0	3.92289e-23	76.015	0.426726	0	9.32061e-22	74.525
E9QKG6;A0A0G2JDZ9;E9Q804;Q99NH0	2150;2292;2400;2401	E9QKG6	E9QKG6	Ankyrin repeat domain-containing protein 17	Ankrd17		0.999255	35.4066	1.50919e-07	55.063	45.093	48.773	0.996764	29.0104	2.59601e-05	45.07					0.998784	32.5019	2.51341e-05	46.3	0.997328	29.0762	1.50919e-07	55.063									0.997191	28.9057	0.0471	42.568	0.998628	33.0568	2.37129e-05	45.611					0.998603
E9QKG6;A0A0G2JDZ9;E9Q804;Q99NH0	1685;1827;1935;1936	E9QKG6	E9QKG6	Ankyrin repeat domain-containing protein 17	Ankrd17		0.996983	25.1905	3.29109e-05	78.814	59.136	63.185	0.996983	25.1905	0.000160151	63.185									0.994072	22.2448	3.29109e-05	78.814					0	0		NaN					0.973085	15.5816	0.00019395	62.287
E9QKG6;A0A0G2JDZ9;E9Q804;Q99NH0	1792;1934;2042;2043	E9QKG6	E9QKG6	Ankyrin repeat domain-containing protein 17	Ankrd17		0.951761	19.4498	6.963e-06	48.115	37.739	48.115									0	0		NaN									0	0		NaN									0.951761	19.4498	6.963e-06	48.115	0.905816
E9QKG6;A0A0G2JDZ9;E9Q804;Q99NH0	1804;1946;2054;2055	E9QKG6	E9QKG6	Ankyrin repeat domain-containing protein 17	Ankrd17		0.999991	51.0495	3.05735e-05	71.08	44.956	71.08	0	0		NaN	0.999946	43.7213	0.000509497	56.599	0	0		NaN	0.999976	47.1211	0.000100912	64.52	0	0		NaN	0	0		NaN	0	0		NaN	0.999991	51.0495	3.05735e-05	71.08	0.999934	42.9895	0.000469397	57.019	0.999934
A0A0N4SV16;A0A0G2JE26;Q6DFX2;Q9CZ52-2;Q9CZ52	379;379;379;379;379	A0A0N4SV16	A0A0N4SV16	Anthrax toxin receptor 2;Anthrax toxin receptor 1	Antxr2;Antxr1		0.989268	21.8786	0.00129734	41.202	36.025	41.202													0	0		NaN													0	0		NaN	0	0		NaN	0.989268
A0A0G2JE55;Q3TUE1;A0A0G2JGW9	128;628;629	A0A0G2JE55	A0A0G2JE55		Fubp1		0.48937	0	2.79086e-25	81.016	81.016	81.016	0.48937	0	2.79086e-25	81.016	0.447954	0	1.34209e-07	53.033	0.395233	0	9.43394e-06	46.786	0.483943	0	2.34462e-11	59.857	0.329599	0	1.29104e-05	47.392					0.464891	0	4.1763e-25	80.382	0.445829	0	2.77308e-11	59.163	0.469232	0	1.39709e-07	52.853	0.427181
D3Z0T9;A0A0G2JE79;D6RCY9;D3Z3Y5;O09039	102;102;102;102;102	D3Z0T9	D3Z0T9	SH2B adapter protein 3	Sh2b3		0.593848	1.64986	2.88902e-06	48.477	42.573	41.513	0	0		NaN																	0.593848	1.64986	8.77452e-05	41.513	0.5	0	6.09305e-05	42.913
D3Z0T9;A0A0G2JE79;D6RCY9;D3Z3Y5;O09039	103;103;103;103;103	D3Z0T9	D3Z0T9	SH2B adapter protein 3	Sh2b3		0.5	0	2.88902e-06	48.477	42.573	48.477	0	0		NaN																					0.5	0	6.09305e-05	42.913
D3Z0T9;A0A0G2JE79;D6RCY9;D3Z3Y5;O09039	129;129;129;129;129	D3Z0T9	D3Z0T9	SH2B adapter protein 3	Sh2b3		0.999993	54.2991	3.94862e-20	68.101	57.982	68.101	0.999993	54.2991	3.94862e-20	68.101					0.99977	41.8358	4.96534e-07	48.088	0	0		NaN	0.999362	34.9577	8.01888e-05	48.76	0	0		NaN	0	0		NaN	0	0		NaN	0	0		NaN	0
A0A0G2JE93;A0A1Y7VJA7;Q9DCI3	193;193;193	A0A0G2JE93	A0A0G2JE93	MLN64 N-terminal domain homolog	Stard3nl		1	41.3995	1.90547e-05	83	66.368	41.399	0	0		NaN	0	0		NaN	0	0		NaN	0	0		NaN	1	73.0667	0.000310942	73.067	1	70.9771	0.000416064	70.977	0	0		NaN	0	0		NaN	0	0		NaN
A0A0G2JEA0;Q6ZPS6	738;738	A0A0G2JEA0	A0A0G2JEA0	Ankyrin repeat and IBR domain-containing protein 1	Ankib1		1	70.0893	3.48687e-17	105.65	79.531	70.089	1	60.4741	0.00090588	60.474	1	70.0893	2.81552e-08	79.771	1	70.2805	3.48687e-17	105.65	1	66.4975	0.000217913	66.498	1	83.6173	1.40873e-05	83.617	1	72.8979	9.50311e-06	72.898	1	70.5287	8.37323e-06	70.529	1	93.0108	1.26514e-08	93.011	1	72.4172	9.27386e-06	83.314	0
A0A0G2JEA9;A0A0G2JFX7;Q9CWZ3-2;Q9CWZ3	7;67;55;56	A0A0G2JEA9	A0A0G2JEA9	RNA-binding protein 8A	Rbm8a		0.96864	14.8979	5.1972e-08	60.991	52.902	41.491													0	0		NaN	0.893893	9.2554	9.11157e-06	48.641					0.95471	13.2387	5.1972e-08	60.991									0.96864
A0A0G2JEG8;Q7TQF7	504;500	A0A0G2JEG8	A0A0G2JEG8	Amphiphysin	Amph		1	55.2131	0.000336903	55.213	46.392	55.213									0	0		NaN	0	0		NaN	0	0		NaN	0	0		NaN	1	55.2131	0.000336903	55.213	0	0		NaN	0	0		NaN	0
A0A0G2JF11;A0A0G2JFU7;Q3TMM7;A0A0G2JGC7;A0A0G2JEM3;F7CVW0;B2RRI2;Q689Z5;Q689Z5-2	178;213;178;177;213;212;213;212;213	A0A0G2JF11	A0A0G2JF11	Protein strawberry notch homolog 1	Sbno1		0.998434	28.1282	0.0169979	79.474	65.412	79.474	0.960696	13.8844	0.0173215	78.149	0.985614	19.4541	0.031564	58.23	0	0		NaN	0	0		NaN	0.998434	28.1282	0.0169979	79.474	0.986347	20.3684	0.0387571	52.482	0.970269	15.1729	0.0307876	58.981	0	0		NaN	0.862373	7.99359	0.0472288	49.423	0
A0A0G2JER6;F8VQE9;Q8VHH5	116;478;478	A0A0G2JER6	A0A0G2JER6	Arf-GAP with GTPase, ANK repeat and PH domain-containing protein 3	Agap3		0.495063	0	0.0219748	45.915	33.69	40.066	0	0		NaN	0	0		NaN	0	0		NaN	0.495063	0	0.0490088	40.066	0	0		NaN	0.475579	0	0.0219748	45.915					0	0		NaN	0	0		NaN
A0A0G2JGW4;A0A0G2JEW4;Q80SY5	5;5;5	A0A0G2JGW4	A0A0G2JGW4	Pre-mRNA-splicing factor 38B	Prpf38b		0.998437	30.6098	2.64186e-14	41.033	36.224	41.033									0	0		NaN													0	0		NaN	0	0		NaN					0
A0A0G2JFD8;A0A0G2JEX1;Q7TPW1;A0A0G2JDY6;A0A0G2JGI1;A0A0G2JDZ8;A0A0G2JDZ3;A0A0G2JFI0;A0A0G2JFT2	80;80;16;80;80;16;16;16;16	A0A0G2JFD8	A0A0G2JFD8	Nexilin	Nexn		0.999984	49.6429	4.09995e-22	104.17	96.787	104.17					0	0		NaN	0.999984	49.6429	4.09995e-22	104.17	0	0		NaN	0	0		NaN									0.740543	6.08569	0.00262261	43.03	0	0		NaN	0.996816
A0A0G2JFD8;A0A0G2JEX1;Q7TPW1;A0A0G2JG59;A0A0G2JGI1	425;559;495;362;482	A0A0G2JFD8	A0A0G2JFD8	Nexilin	Nexn		0.381743	1.20506	8.72722e-07	50.492	43.916	50.492									0.381743	1.20506	8.72722e-07	50.492																									0
A0A0G2JFD8;A0A0G2JEX1;Q7TPW1;A0A0G2JG59;A0A0G2JGI1	453;587;523;390;510	A0A0G2JFD8	A0A0G2JFD8	Nexilin	Nexn		0.99669	24.7923	1.17232e-05	82.362	70.872	79.492					0	0		NaN	0.954772	13.2457	0.000323847	66.498					0.922109	10.7333	6.09622e-05	74.46	0.99669	24.7923	2.06426e-05	79.492	0.986488	18.6349	1.17232e-05	82.362	0.909522	10.0345	0.00156375	54.65
A0A0G2JFD8;A0A0G2JEX1;Q7TPW1;A0A0G2JG59;A0A0G2JDY6	211;345;281;148;331	A0A0G2JFD8	A0A0G2JFD8	Nexilin	Nexn		1	88.3035	1.39124e-40	137.61	98.394	137.61	0.999995	53.0683	1.92845e-21	102.38	0.999884	39.96	8.50832e-05	71.354	0.999947	43.2677	0.000492877	60.657	1	88.3035	1.39124e-40	137.61	0.99999	50.6687	6.27601e-05	73.022	0.999292	31.81	0.00315349	44.426	0.999906	40.3963	0.000465903	59.607	0.999995	54.1547	8.98251e-16	100.54	0.999765	38.6552	0.000832757	58.21	0.999968
A0A0G2JFD8;A0A0G2JEX1;Q7TPW1;A0A0G2JG59;A0A0G2JDY6	218;352;288;155;338	A0A0G2JFD8	A0A0G2JFD8	Nexilin	Nexn		0.999999	60.5959	3.35102e-14	100.55	73.143	97.121	0.999816	37.3745	3.08452e-05	71.241	0.996693	24.8062	0.000247134	59.185	0.999782	36.6752	3.22775e-05	72.089	0.999999	60.5959	3.33805e-13	97.121	0.979153	16.7271	0.000828894	53.252	0.999776	36.605	0.000141407	62.042	0.999303	33.5902	0.000226461	67.275	0.999962	44.2189	2.01867e-05	79.633	0.999776	36.605	0.000141407	62.042	0.999998
A0A0G2JFD8;A0A0G2JEX1;Q7TPW1;A0A0G2JG59;A0A0G2JDY6;A0A0G2JGI1	226;360;296;163;346;283	A0A0G2JFD8	A0A0G2JFD8	Nexilin	Nexn		0.999565	36.608	1.93058e-23	106.49	82.743	89.301	0.999437	34.1597	1.00326e-08	93.959	0.997951	27.9976	2.47602e-12	80.69	0.999565	36.608	7.12334e-08	89.301	0.994667	23.4374	5.12485e-06	85.845	0.999494	33.8398	1.53008e-11	106.49	0.998382	29.0455	7.12334e-08	89.301	0.921306	10.7509	6.98815e-08	89.403	0.987402	19.4308	2.07062e-07	88.441	0.979629	16.9239	1.74535e-05	74.76	0.99821
A0A0G2JFD8;A0A0G2JEX1;Q7TPW1;A0A0G2JG59;A0A0G2JDY6;A0A0G2JGI1	229;363;299;166;349;286	A0A0G2JFD8	A0A0G2JFD8	Nexilin	Nexn		0.914313	10.3739	1.06708e-17	76.691	67.105	65.423	0.834519	7.48126	5.30145e-08	57.009	0.914313	10.3739	2.47602e-12	65.423	0.785618	8.65389	0.00376447	47.288	0.822823	8.89121	1.9904e-05	45.696	0.835164	8.81004	1.55405e-05	46.956	0	0		NaN					0.847689	7.55606	2.90824e-07	55.063	0.826355	8.98366	1.74535e-05	46.404	0.892028
A0A0G2JEY4;Q9CXL3	48;48	A0A0G2JEY4	A0A0G2JEY4	Uncharacterized protein C7orf50 homolog			0.791598	10.8848	3.49621e-05	45.28	32.143	45.28									0	0		NaN	0.791598	10.8848	3.49621e-05	45.28					0	0		NaN									0	0		NaN	0
A0A0G2JFC0;A0A0G2JGV2;Q9QZK2-2;Q9QZK2	16;16;245;365	A0A0G2JFC0	A0A0G2JFC0	Breast cancer anti-estrogen resistance protein 3	Bcar3		0.864868	8.07325	0.000151486	62.891	51.74	60.628					0	0		NaN	0.825987	6.76846	0.000151486	62.891	0	0		NaN	0.530119	0.539559	0.00464215	41.092									0	0		NaN	0.498007	0	0.0349615	40.725
A0A0G2JFH2;P27546-3;P27546-2;P27546	18;617;617;617	A0A0G2JFH2;P27546-3	P27546-3	Microtubule-associated protein 4	Map4		0.992181	24.0445	2.35735e-07	52.824	45.378	41.115									0.992181	24.0445	1.58035e-05	41.115	0.984588	21.0642	2.35735e-07	52.824					0.976472	19.191	9.01403e-06	47.155
A0A0G2JFH2;P27546-3;P27546-2;P27546;A0A0G2JDN7;E9PZ43;P27546-4	1128;667;667;667;514;514;514	A0A0G2JFH2;P27546-3	P27546-3	Microtubule-associated protein 4;Microtubule-associated protein	Map4		0.999746	39.0658	1.9111e-39	94.192	88.658	78.45	0.997214	28.7647	1.08159e-12	63.323	0.997542	26.846	7.17445e-21	70.647	0.99764	29.4899	7.74774e-21	70.213	0.997937	29.8766	1.9111e-39	94.192	0.996632	27.8297	4.82611e-21	72.425	0.983413	20.8541	7.17445e-21	70.647	0.999746	39.0658	4.41326e-25	78.45	0.998833	32.4477	6.52473e-25	76.611	0.994049	23.3517	4.94843e-25	77.984	0.99651
A0A0G2JFH2;P27546-3;P27546-2;P27546;A0A0G2JDN7;E9PZ43;P27546-4;A0A0G2JFT4;A0A0G2JG35;A0A140T8T5	1246;785;785;785;632;632;632;5;5;74	A0A0G2JFH2;P27546-3	P27546-3	Microtubule-associated protein 4;Microtubule-associated protein	Map4		0.951338	13.5009	3.91785e-05	72.175	62.642	72.175					0.619943	3.0603	0.000257485	57.836					0.499287	0	0.000406957	70.488	0.332828	0	0.000791808	47.288	0.340704	0	0.00616023	46.592	0.473436	0	0.00218572	56.225	0.546529	1.40173	0.000164112	66.797	0.951338	13.5009	3.91785e-05	72.175	0.476186
A0A0G2JFH2;P27546-3;P27546-2;P27546;A0A0G2JDN7;E9PZ43;P27546-4;A0A0G2JFT4;A0A0G2JG35;A0A140T8T5	1248;787;787;787;634;634;634;7;7;76	A0A0G2JFH2;P27546-3	P27546-3	Microtubule-associated protein 4;Microtubule-associated protein	Map4		0.332828	0	0.000791808	47.288	34.928	47.288																	0.332828	0	0.000791808	47.288
A0A0G2JFH2	266	A0A0G2JFH2	A0A0G2JFH2				0.999653	35.4352	0.000681022	101.65	27.182	91.867	0.999494	33.749	0.000681022	101.65	0.999325	32.517	0.00187356	91.867	0.999626	34.9543	0.000681022	101.65	0.999561	34.2771	0.00187356	91.867	0.998801	30.1313	0.00160742	90.15	0.999626	34.9543	0.000681022	101.65	0.999653	35.4352	0.00187356	91.867	0.999616	34.9793	0.00202417	92.838	0.999626	34.9543	0.000681022	101.65	0.998801
A0A0G2JFH2	570	A0A0G2JFH2	A0A0G2JFH2				1	40.0672	0.0111053	40.067	23.103	40.067	0	0		NaN	1	40.0672	0.0111053	40.067	0	0		NaN	0	0		NaN	0	0		NaN	0	0		NaN	0	0		NaN	0	0		NaN	0	0		NaN	0
A0A0G2JFH2	578	A0A0G2JFH2	A0A0G2JFH2				0.999446	32.5633	9.74052e-09	66.853	53.151	55.302	0.986918	18.776	9.74052e-09	66.853					0.992822	21.4085	2.00444e-08	60.133	0	0		NaN					0.999446	32.5633	2.55904e-07	55.302	0.995344	23.2993	2.25183e-05	44.863	0.990663	20.257	3.42583e-05	43.38	0.92973	11.2158	5.5726e-05	40.668
A0A0G2JFH2	902	A0A0G2JFH2	A0A0G2JFH2				0.985649	18.4712	4.61546e-25	93.583	79.111	93.583	0	0		NaN	0	0		NaN	0.902279	9.72547	1.65672e-05	46.403	0	0		NaN	0	0		NaN	0.939564	11.934	9.85148e-10	73.036	0.985649	18.4712	4.61546e-25	93.583	0	0		NaN	0	0		NaN	0
A0A0G2JFH2;P27546-3;P27546-2;P27546;A0A0G2JDN7;E9PZ43;P27546-4;A0A0G2JFT4;A0A0G2JG35;A0A140T8T5;A0A0G2JFK3;A0A0G2JDY5	1362;901;901;901;748;748;748;121;121;190;21;29	A0A0G2JFH2;P27546-3	P27546-3	Microtubule-associated protein 4;Microtubule-associated protein	Map4		0.996378	24.4501	9.28649e-12	107.85	95.981	107.85	0.996378	24.4501	9.28649e-12	107.85	0.972301	15.5344	6.89065e-07	88.187	0.993787	22.8088	0.000665683	60.49	0.753814	4.94102	2.65999e-05	77.593	0.994946	23.7825	0.000133575	70.488	0.945502	13.18	7.9704e-05	73.435	0.960301	14.6104	0.000665683	60.49	0.969957	15.1857	2.65999e-05	77.593	0.968194	14.9797	0.000167026	69.451	0.968403
A0A0G2JFH2;P27546-3;P27546-2;P27546;A0A0G2JDN7;E9PZ43;P27546-4;A0A0G2JFT4;A0A0G2JG35;A0A140T8T5	1259;798;798;798;645;645;645;18;18;87	A0A0G2JFH2;P27546-3	P27546-3	Microtubule-associated protein 4;Microtubule-associated protein	Map4		0.997942	29.8662	0.0187046	48.091	12.822	48.091									0.997927	28.0855	0.0223693	45.598	0.997942	29.8662	0.0187046	48.091
A0A0G2JFH2	742	A0A0G2JFH2	A0A0G2JFH2				0.990331	20.1042	0.030107	43.124	24.029	43.124	0	0		NaN	0	0		NaN					0	0		NaN									0.990331	20.1042	0.030107	43.124					0	0		NaN	0
A0A0G2JFH2	72	A0A0G2JFH2	A0A0G2JFH2				1	41.4008	9.54086e-06	74.296	60.266	41.401	1	70.5287	9.54086e-06	70.529	1	41.4008	1.01729e-05	71.692	1	56.1224	1.15881e-05	74.296	1	72.1749	1.04354e-05	72.175	1	40.4755	0.000141615	57.328	1	58.8852	0.000114464	58.885	1	56.5991	0.000163987	56.599	1	65.4716	2.83327e-05	65.472	1	72.1749	1.04354e-05	72.175	1
A0A0G2JFM9;E9PUK3;E9PUI5;Q8K012-2;Q8K012	334;430;488;429;488	A0A0G2JFM9	A0A0G2JFM9	Formin-binding protein 1-like	Fnbp1l		0.860459	7.90069	5.80021e-24	74.141	68.246	56.215	0.860459	7.90069	1.06984e-07	56.215	0.499995	0	0.000124591	54.974	0.499988	0	0.000102382	56.215	0.499947	0	0.000641563	43.794	0.795264	5.94157	1.41638e-17	61.815	0.5	0	4.29919e-06	74.141	0.5	0	2.69457e-05	65.716	0.788905	5.80146	4.17322e-12	54.994	0.497804	0	4.80471e-18	62.683	0.760734
A0A0G2JFM9;E9PUK3;E9PUI5;Q8K012-2;Q8K012	335;431;489;430;489	A0A0G2JFM9	A0A0G2JFM9	Formin-binding protein 1-like	Fnbp1l		0.569042	1.2318	5.07888e-69	99.25	92.275	84.822	0	0		NaN	0.499995	0	0.000124591	54.974	0.499988	0	0.000102382	56.215	0.551867	1.03946	2.02668e-24	68.101	0.499997	0	4.89013e-05	61.815	0.569042	1.2318	1.13927e-49	84.822	0.5	0	2.69457e-05	65.716	0.499964	0	0.000291476	49.537	0.537565	0.655541	4.80471e-18	62.683	0.499996
A0A0G2JFM9;E9PUK3;E9PUI5;Q8K012-2;Q8K012	347;443;501;442;501	A0A0G2JFM9	A0A0G2JFM9	Formin-binding protein 1-like	Fnbp1l		0.326769	0	4.80471e-18	62.683	54.817	62.683	0	0		NaN	0	0		NaN																					0	0		NaN	0.326769	0	4.80471e-18	62.683	0
A0A0G2JFM9;E9PUK3;E9PUI5;Q8K012-2;Q8K012	351;447;505;446;505	A0A0G2JFM9	A0A0G2JFM9	Formin-binding protein 1-like	Fnbp1l		0.326769	0	4.80471e-18	62.683	54.817	62.683	0	0		NaN	0	0		NaN																					0	0		NaN	0.326769	0	4.80471e-18	62.683	0
A0A0G2JFM9;E9PUK3;E9PUI5;Q8K012-2;Q8K012	141;295;295;295;295	A0A0G2JFM9	A0A0G2JFM9	Formin-binding protein 1-like	Fnbp1l		0.994389	23.2984	0.000665683	60.49	39.865	60.49	0.994389	23.2984	0.000665683	60.49	0.492501	0	0.00414428	46.158	0.752097	5.90805	0.00278296	50.207	0.847516	8.17584	0.00379479	47.198	0.920785	11.5503	0.00392214	46.819	0.84293	8.07188	0.00414428	46.158									0.847516	8.17584	0.00379479	47.198	0.847516
A0A0G2JFP3	90	A0A0G2JFP3	A0A0G2JFP3				0.399522	0	0.00254217	46.408	7.8972	46.408					0	0		NaN	0	0		NaN					0.399522	0	0.00254217	46.408	0	0		NaN	0	0		NaN					0	0		NaN	0
A0A0G2JFP3	92	A0A0G2JFP3	A0A0G2JFP3				0.443377	0	0.00254217	46.408	7.8972	46.408					0	0		NaN	0	0		NaN					0.443377	0	0.00254217	46.408	0	0		NaN	0	0		NaN					0	0		NaN	0
A0A0G2JFP3	93	A0A0G2JFP3	A0A0G2JFP3				0.536144	3.93882	0.00237925	46.408	7.8972	42.314					0	0		NaN	0	0		NaN	0.536144	3.93882	0.00237925	42.314	0.425271	0	0.00254217	46.408	0	0		NaN	0	0		NaN					0	0		NaN	0
A0A0G2JFP3	97	A0A0G2JFP3	A0A0G2JFP3				0.422584	3.93882	0.00237925	42.314	9.6122	42.314					0	0		NaN	0	0		NaN	0.422584	3.93882	0.00237925	42.314					0	0		NaN	0	0		NaN					0	0		NaN	0
F6ZZB1;F6VTL9;A0A0G2JFQ4;E9Q9L6;Q6ZQA0;Q6ZQA0-2	1058;2017;2701;2735;2727;2728	F6ZZB1	F6ZZB1	Neurobeachin-like protein 2	Nbeal2		0.981967	18.3635	1.16271e-06	67.979	60.357	63.726					0.879261	11.5598	2.76091e-05	45.395	0.777262	5.89981	3.27843e-06	55.437	0.981967	18.3635	3.07793e-06	63.726	0.972488	16.4525	2.99033e-06	62.611	0.642388	5.87196	2.76091e-05	45.395					0.72824	7.41691	9.75427e-06	50.029	0.960945	14.3838	3.37096e-06	55.228	0.904393
Q9D394-4;Q9D394-2;A0A0G2JFT8	53;53;53	Q9D394-4	Q9D394-4				0.996713	24.8235	6.3923e-83	88.161	81.813	80.828	0.934717	11.5688	3.2222e-33	59.364	0.856477	7.75851	1.28583e-25	56.475	0.958184	13.6011	3.62813e-82	86.544	0.996713	24.8235	9.10595e-68	80.828	0.948701	12.6725	2.12011e-43	67.062	0.967775	14.9308	3.29346e-26	57.192	0.991031	20.4369	1.15779e-67	80.43	0.946801	12.505	3.7279e-33	58.691	0.970785	15.2177	1.08452e-34	63.509	0.988306
Q9D394-4;Q9D394-2;A0A0G2JFT8	27;27;27	Q9D394-4	Q9D394-4				1	61.6499	1.97715e-12	98.105	69.147	61.65	1	57.3483	5.71543e-05	98.105	1	61.6499	0.000286912	73.435	1	40.7149	0.000111472	83.617	1	49.3505	9.18592e-05	88.021	1	65.5005	0.000101549	85.845	1	59.4259	0.00011341	83.182	1	73.7813	0.000101549	85.845	1	65.5005	0.000599206	70.942	1	57.3483	0.000467586	66.538	1
A0A0G2JFW6;Q6NXI6-2;Q6NXI6	843;882;926	A0A0G2JFW6	A0A0G2JFW6	Regulation of nuclear pre-mRNA domain-containing protein 2	Rprd2		0.541553	0.723517	0.000558597	53.683	45.796	43.512					0.5	0	0.000619036	52.79					0.5	0	0.000558597	53.683	0.541553	0.723517	0.00249891	43.512																	0.5
A0A0G2JFW6;Q6NXI6-2;Q6NXI6	844;883;927	A0A0G2JFW6	A0A0G2JFW6	Regulation of nuclear pre-mRNA domain-containing protein 2	Rprd2		0.916565	10.4082	0.000558597	53.683	45.796	49.627					0.5	0	0.000619036	52.79					0.5	0	0.000558597	53.683																	0.916565	10.4082	0.00108231	49.627	0.5
A0A0G2JFW6;Q6NXI6-2;Q6NXI6	421;460;504	A0A0G2JFW6	A0A0G2JFW6	Regulation of nuclear pre-mRNA domain-containing protein 2	Rprd2		0.743714	8.27387	1.39206e-13	65.038	39.742	61.097	0.688759	6.05321	7.78568e-05	50.305	0.42066	0	0.004653	41.54	0.743714	8.27387	2.86742e-05	61.097	0.471838	3.87033	0.000707942	41.087	0.61102	6.68851	0.000174639	46.926	0.612894	8.01629	4.44999e-05	52.823					0.510982	5.69989	0.000545422	42.338	0.376478	0	6.81555e-06	50.029	0.678719
A0A0G2JFW6;Q6NXI6-2;Q6NXI6	529;568;612	A0A0G2JFW6	A0A0G2JFW6	Regulation of nuclear pre-mRNA domain-containing protein 2	Rprd2		0.953419	15.0774	3.12479e-41	103.85	89.888	89.846	0.866914	14.5308	1.50392e-24	89.049	0.244225	0	4.57379e-07	55.213	0.533073	1.82846	3.45968e-08	59.9	0.928766	12.6442	3.12479e-41	103.85	0.324263	0	8.77378e-11	75.669					0.493635	3.33674	0.000100284	40.349	0.953419	15.0774	1.29266e-24	89.846	0.214163	0	7.34701e-05	42.317	0.738331
A0A0G2JFW6;Q6NXI6-2;Q6NXI6	531;570;614	A0A0G2JFW6	A0A0G2JFW6	Regulation of nuclear pre-mRNA domain-containing protein 2	Rprd2		0.324263	0	8.77378e-11	75.669	61.411	75.669					0.244225	0	4.57379e-07	55.213									0.324263	0	8.77378e-11	75.669													0.214163	0	7.34701e-05	42.317
A0A0G2JFW6;Q6NXI6-2;Q6NXI6	532;571;615	A0A0G2JFW6	A0A0G2JFW6	Regulation of nuclear pre-mRNA domain-containing protein 2	Rprd2		0.244225	0	4.57379e-07	55.213	46.499	55.213					0.244225	0	4.57379e-07	55.213																									0.214163	0	7.34701e-05	42.317
A0A0G2JFW6;Q6NXI6-2;Q6NXI6	666;705;749	A0A0G2JFW6	A0A0G2JFW6	Regulation of nuclear pre-mRNA domain-containing protein 2	Rprd2		0.51516	0.352201	1.7259e-19	65.423	58.548	65.423					0	0		NaN													0	0		NaN
A0A0G2JFZ4;E9Q7M2	587;587	A0A0G2JFZ4	A0A0G2JFZ4		Tsc22d2		0.999958	44.9369	2.44896e-05	50.029	45.028	50.029	0.999901	41.5178	6.633e-05	45.704	0	0		NaN					0	0		NaN	0	0		NaN									0.999958	44.9369	2.44896e-05	50.029					0
A0A0G2JG07;Q3UHD6-2;Q3UHD6	49;49;49	A0A0G2JG07	A0A0G2JG07	Sorting nexin-27	Snx27		0.990948	23.4034	0.00103636	58.699	45.12	58.699	0	0		NaN	0	0		NaN					0	0		NaN	0	0		NaN	0	0		NaN	0	0		NaN	0	0		NaN	0	0		NaN	0.990948
A0A0G2JG76;Q9ES34	140;420	A0A0G2JG76	A0A0G2JG76	Ubiquitin-protein ligase E3B	Ube3b		0.453214	0	6.23498e-06	46.982	40.618	45.784	0.333333	0	6.23498e-06	46.982					0	0		NaN					0	0		NaN									0	0		NaN	0	0		NaN	0
A0A0G2JG76;Q9ES34	141;421	A0A0G2JG76	A0A0G2JG76	Ubiquitin-protein ligase E3B	Ube3b		0.453214	0	6.23498e-06	46.982	40.618	45.784	0.333333	0	6.23498e-06	46.982					0	0		NaN					0	0		NaN									0	0		NaN	0	0		NaN	0
D6RFC5;A0A0G2JGC9;F6RDA7;D6RHB1;A0A0R4J0W6;Q9CRC8	37;29;39;37;37;37	D6RFC5	D6RFC5	Leucine-rich repeat-containing protein 40	Lrrc40		0.5	0	0.0445273	41.704	22.974	41.704	0	0		NaN																	0	0		NaN	0.5	0	0.0445273	41.704
D6RFC5;A0A0G2JGC9;F6RDA7;D6RHB1;A0A0R4J0W6;Q9CRC8	38;30;40;38;38;38	D6RFC5	D6RFC5	Leucine-rich repeat-containing protein 40	Lrrc40		0.5	0	0.0445273	41.704	22.974	41.704	0	0		NaN																	0	0		NaN	0.5	0	0.0445273	41.704
A0A0G2JGG3;O70343	615;615	A0A0G2JGG3	A0A0G2JGG3	Peroxisome proliferator-activated receptor gamma coactivator 1-alpha	Ppargc1a		0.998793	29.5961	0.000589849	57.802	46.589	57.802	0.998793	29.5961	0.000589849	57.802									0	0		NaN					0.97965	16.93	0.00328184	45.257
A0A0G2JGN6;Q9CR00	80;126	A0A0G2JGN6	A0A0G2JGN6	26S proteasome non-ATPase regulatory subunit 9	Psmd9		0.558354	1.01835	1.01719e-05	75.479	66.52	75.479					0	0		NaN	0	0		NaN					0	0		NaN					0.558354	1.01835	1.01719e-05	75.479					0.5	0	0.000954376	41.695
A0A0G2JGN6;Q9CR00	82;128	A0A0G2JGN6	A0A0G2JGN6	26S proteasome non-ATPase regulatory subunit 9	Psmd9		0.987207	18.8743	5.88079e-22	102.87	91.708	96.059	0.860557	7.90382	1.93309e-05	73.466	0.84943	7.5139	2.94609e-05	71.241	0.823635	6.69322	0.00045177	55.261	0.91534	10.339	1.48071e-05	74.46	0.737812	4.49332	0.000118913	64.65	0.865474	8.08448	2.97575e-05	71.176					0.976042	16.1002	5.88079e-22	102.87	0.881368	8.70955	0.000539389	53.967	0.987207
Q80VB6;A0A0G2JGQ6;Q9JLM8;Q9JLM8-2	307;307;307;307	Q80VB6	Q80VB6	Serine/threonine-protein kinase DCLK1	Dclk1		0.181923	0	2.88872e-05	40.756	31.755	40.756	0.160757	0	2.96496e-05	40.012					0	0		NaN					0.181923	0	2.88872e-05	40.756
Q80VB6;A0A0G2JGQ6;Q9JLM8;Q9JLM8-2	310;310;310;310	Q80VB6	Q80VB6	Serine/threonine-protein kinase DCLK1	Dclk1		0.261076	1.62715	3.9038e-11	62.684	58.157	47.507	0.160757	0	2.96496e-05	40.012	0.198824	0	1.37509e-05	47.808	0	0		NaN					0.181923	0	2.88872e-05	40.756									0.261076	1.62715	1.49105e-05	47.507
Q80VB6;A0A0G2JGQ6;Q9JLM8;Q9JLM8-2	312;312;312;312	Q80VB6	Q80VB6	Serine/threonine-protein kinase DCLK1	Dclk1		0.198824	0	3.9038e-11	62.684	58.157	47.808	0.160757	0	2.96496e-05	40.012	0.198824	0	1.37509e-05	47.808	0	0		NaN					0.181923	0	2.88872e-05	40.756
Q80VB6;A0A0G2JGQ6;Q9JLM8;Q9JLM8-2	313;313;313;313	Q80VB6	Q80VB6	Serine/threonine-protein kinase DCLK1	Dclk1		0.198824	0	3.9038e-11	62.684	58.157	47.808	0.160757	0	2.96496e-05	40.012	0.198824	0	1.37509e-05	47.808	0	0		NaN					0.181923	0	2.88872e-05	40.756
Q80VB6;A0A0G2JGQ6;Q9JLM8;A8IP62;A0A0G2JGH1;Q1EDH1;H7BX36;A0A0G2JE54;Q8CCN4;A0A0G2JEN4;Q9JLM8-2	334;334;334;27;27;27;27;27;27;27;334	Q80VB6	Q80VB6	Serine/threonine-protein kinase DCLK1	Dclk1		0.314881	0	0.00818777	42.395	30.529	42.395	0.314881	0	0.00818777	42.395					0	0		NaN									0	0		NaN
Q80VB6;A0A0G2JGQ6;Q9JLM8;A8IP62;A0A0G2JGH1;Q1EDH1;H7BX36;A0A0G2JE54;Q8CCN4;A0A0G2JEN4;Q9JLM8-2	337;337;337;30;30;30;30;30;30;30;337	Q80VB6	Q80VB6	Serine/threonine-protein kinase DCLK1	Dclk1		0.45562	0	0.000222815	77.662	38.358	77.662	0.314881	0	0.00818777	42.395					0	0		NaN	0.435055	0	0.0282579	42.789	0.454895	0	0.000239802	72.496	0	0		NaN	0.45562	0	0.000222815	77.662
A0A0G2JGW0;Q91Z31;Q91Z31-2	308;308;308	A0A0G2JGW0	A0A0G2JGW0	Polypyrimidine tract-binding protein 2	Ptbp2		0.998645	31.6852	5.47994e-43	77.241	74.253	68.657	0.97103	18.1329	4.31258e-09	50.029	0.998501	31.2467	1.89891e-33	74.287	0.998645	31.6852	2.39669e-25	68.657	0.989298	22.669	3.94007e-18	59.046	0.991796	23.8344	2.17599e-18	61.109									0.992259	24.0884	1.38624e-18	62.032	0.882989	11.7876	1.41021e-06	43.206	0.994963
A0A0G2JH06;E9Q5F9-2;E9Q5F9	470;753;753	A0A0G2JH06	A0A0G2JH06	Histone-lysine N-methyltransferase SETD2	Setd2		1	48.1774	0.000756431	48.177	33.146	48.177									0	0		NaN					1	48.1774	0.000756431	48.177									1	43.2974	0.00144324	43.297	0	0		NaN
A0A0G2JH06;E9Q5F9-2;E9Q5F9	350;633;633	A0A0G2JH06	A0A0G2JH06	Histone-lysine N-methyltransferase SETD2	Setd2		1	50.8512	8.16731e-20	91.319	78.764	50.851	1	42.4541	0.000158697	42.454	1	50.8512	1.32436e-05	50.851	1	42.0407	0.000174897	42.041					0	0		NaN	1	91.3186	8.16731e-20	91.319	0	0		NaN									0
A0A0G2JH06;E9Q5F9-2;E9Q5F9	331;614;614	A0A0G2JH06	A0A0G2JH06	Histone-lysine N-methyltransferase SETD2	Setd2		0.938857	14.3053	1.05891e-05	68.257	56.391	63.128									0.938857	14.3053	3.10939e-05	63.128	0.716574	6.2435	4.29872e-05	53.169	0.478551	0.0511372	4.01047e-05	53.828	0	0		NaN	0.768203	6.03877	0.000209074	45.723	0.784405	7.7153	0.000253686	44.807	0	0		NaN	0.577264
A0A0G2JH12;Q6P9N1-2;Q6P9N1-3;Q6P9N1	237;319;319;319	A0A0G2JH12	A0A0G2JH12	Hyccin	Fam126a		0.463174	0	0.00376443	51.268	37.914	51.268					0	0		NaN	0.463174	0	0.00376443	51.268					0	0		NaN	0	0		NaN					0.453522	0	0.0110797	43.308	0.45439	0	0.00961506	44.318	0.45439
A0A0G2JH12;Q6P9N1-2;Q6P9N1-3;Q6P9N1	239;321;321;321	A0A0G2JH12	A0A0G2JH12	Hyccin	Fam126a		0.75497	7.89741	0.00376443	51.268	37.914	50.292					0	0		NaN	0.463174	0	0.00376443	51.268	0.75497	7.89741	0.00450195	50.292	0	0		NaN	0	0		NaN					0.453522	0	0.0110797	43.308	0.45439	0	0.00961506	44.318	0.45439
K3W4P2;A0A0G2JH17;Q6P4S8;A0A0G2JDG8	131;131;104;104	K3W4P2	K3W4P2	Integrator complex subunit 1	Ints1		0.993164	21.6222	0.0173215	78.149	6.4569	59.35	0.988477	19.3339	0.0173215	78.149	0.962283	14.0676	0.0252566	69.598													0.993164	21.6222	0.0304059	59.35					0	0		NaN
K3W4P2;A0A0G2JH17;Q6P4S8;A0A0G2JDG8	133;133;106;106	K3W4P2	K3W4P2	Integrator complex subunit 1	Ints1		0.635298	2.41039	0.0288846	57.96	15.851	57.96	0.635298	2.41039	0.0288846	57.96									0.62521	2.22237	0.0332829	55.549					0.631118	2.33224	0.0519408	48.794					0	0		NaN
K3W4P2;A0A0G2JH17;Q6P4S8	1345;1347;1320	K3W4P2	K3W4P2	Integrator complex subunit 1	Ints1		0.75061	4.83407	2.70666e-05	45.042	40.773	45.042					0	0		NaN	0	0		NaN					0	0		NaN					0.75061	4.83407	2.70666e-05	45.042
A0A0H2UH20;E9PUD0;D3Z4U0;Q9R020-2;Q9R020	14;83;120;83;120	A0A0H2UH20	A0A0H2UH20	Zinc finger Ran-binding domain-containing protein 2	Zranb2		0.999999	63.3504	6.85333e-62	112.88	96.772	112.88	0.999909	41.0244	1.13505e-17	77.053	0.999818	37.5747	1.06019e-23	87.102	0.999995	53.9944	7.36776e-51	106.43	0.99997	45.9127	1.37299e-39	98.121	0.999853	39.1863	2.33425e-30	90.534	0.999785	37.5747	1.32408e-23	87.102	0.999918	43.8472	5.69251e-18	79.762	0.999999	63.3504	6.85333e-62	112.88	0.999762	37.2345	7.76383e-19	87.659	0.999928
A0A0H2UH22;E9Q5X2;E9Q969;Q812E0;D3YUJ4	372;537;537;44;12	A0A0H2UH22	A0A0H2UH22	Cytoplasmic polyadenylation element-binding protein 2	Cpeb2		0.990409	20.1394	0.000182216	62.14	47.787	62.14	0	0		NaN	0.990409	20.1394	0.000182216	62.14													0	0		NaN	0	0		NaN
A0A0H2UH22;E9Q5X2;E9Q969;Q812E0	349;514;514;21	A0A0H2UH22	A0A0H2UH22	Cytoplasmic polyadenylation element-binding protein 2	Cpeb2		1	63.8035	1.09006e-20	71.535	64.582	63.803	1	63.8035	5.86724e-16	63.803					1	40.4544	1.09006e-20	71.535	1	70.9828	1.34943e-20	70.983	0.759611	4.99677	1.51018e-05	40.012	0.910003	10.0481	1.44013e-05	41.115	0.953648	13.1332	4.71074e-17	67.251	0.960519	13.8611	7.22312e-17	65.855	0.982899	17.5948	9.29694e-08	54.223	0.964736
A0A0H2UH22;E9Q5X2;E9Q969;Q812E0	352;517;517;24	A0A0H2UH22	A0A0H2UH22	Cytoplasmic polyadenylation element-binding protein 2	Cpeb2		1	63.8035	6.56994e-20	70.983	63.45	63.803	1	63.8035	5.86724e-16	63.803					1	40.4544	7.96549e-05	40.454	1	70.9828	6.56994e-20	70.983
F7BWJ0;A0A0H2UH25;Q3UXU7;Q80Z96	67;340;340;340	F7BWJ0	F7BWJ0	Vang-like protein 1	Vangl1		0.499696	0	4.91095e-06	57.484	48.387	57.484									0	0		NaN					0	0		NaN									0.499696	0	4.91095e-06	57.484	0	0		NaN
F7BWJ0;A0A0H2UH25;Q3UXU7;Q80Z96	68;341;341;341	F7BWJ0	F7BWJ0	Vang-like protein 1	Vangl1		0.499696	0	4.91095e-06	57.484	48.387	57.484									0	0		NaN					0	0		NaN									0.499696	0	4.91095e-06	57.484	0	0		NaN
A0A0J9YTQ7;D3Z780;Q61749;Q61749-2	41;63;21;41	A0A0J9YTQ7	A0A0J9YTQ7	Translation initiation factor eIF-2B subunit delta	Eif2b4		0.999962	44.2291	0.000337027	58.487	39.429	58.487	0.999759	36.1727	0.000362728	57.804	0.999864	38.6522	0.0012744	48.704	0.999958	43.7947	0.000362728	57.804	0.9997	35.2318	0.00147627	47.532	0.999962	44.2291	0.000337027	58.487	0	0		NaN	0.999012	30.0487	0.00300162	42.317	0	0		NaN	0.999773	36.4408	0.000337027	58.487	0.99992
A0A0J9YTS1;A0A0J9YUH4;F8VQ05	181;827;1958	A0A0J9YTS1	A0A0J9YTS1		Fryl		0.499999	0	4.5407e-05	71.692	55.936	71.692	0.499503	0	0.0174411	43.544	0.494132	0	0.00441418	40.801	0	0		NaN	0	0		NaN	0	0		NaN	0	0		NaN	0	0		NaN	0	0		NaN	0	0		NaN	0.498871
A0A0J9YTS1;A0A0J9YUH4;F8VQ05	138;784;1915	A0A0J9YTS1	A0A0J9YTS1		Fryl		0.499999	0	3.51627e-21	70.213	56.341	70.213	0	0		NaN	0	0		NaN	0	0		NaN					0.499999	0	3.51627e-21	70.213					0	0		NaN	0.497481	0	3.14403e-05	40.544	0.498765	0	2.7801e-05	41.133	0.499987
A0A0J9YTS1;A0A0J9YUH4;F8VQ05	202;848;1979	A0A0J9YTS1	A0A0J9YTS1		Fryl		0.98723	21.2637	0.0398494	67.726	43.696	67.726	0.98723	21.2637	0.0398494	67.726	0	0		NaN									0	0		NaN	0	0		NaN	0	0		NaN					0	0		NaN
A0A0J9YUF8;A0A0J9YTU3;Q5SXY1-2;Q5SXY1	54;54;54;54	A0A0J9YUF8	A0A0J9YUF8	Cytospin-B	Specc1		0.498096	0	6.10795e-07	60.448	46.29	60.448	0	0		NaN					0	0		NaN									0	0		NaN					0	0		NaN	0.498096	0	6.10795e-07	60.448	0
A0A0J9YUF8;A0A0J9YTU3;Q5SXY1-2;Q5SXY1	55;55;55;55	A0A0J9YUF8	A0A0J9YUF8	Cytospin-B	Specc1		0.969846	15.6118	1.41612e-10	75.646	68.194	75.646	0.969846	15.6118	1.41612e-10	75.646					0.576909	1.46115	5.3498e-08	57.61	0.810578	7.05785	5.27098e-08	59.356	0.944716	12.6621	5.24449e-08	59.943	0	0		NaN	0.578599	1.51117	2.31381e-07	54.964	0.57691	1.46115	5.3498e-08	57.61	0.751787	5.69416	6.10795e-07	60.448	0.790006
A0A0J9YU37;A0A0J9YVI1;A0A0J9YVG2;A0A0J9YUK1;A0A0J9YUP9;A0A0J9YUZ0;E9Q8G4;Q60722-3;Q60722;A0A0J9YU91;A0A0J9YV50;A0A0J9YUX6;A0A0J9YUT7;Q91YV0;A0A0J9YTR9;A0A0J9YUG4;A0A0J9YTU7;A0A0J9YTW1;Q60722-2	309;309;344;344;345;345;391;369;369;154;130;209;240;210;210;240;240;290;210	A0A0J9YU37	A0A0J9YU37	Transcription factor 4	Tcf4		0.354389	0.928625	1.74144e-12	64.203	54.623	55.763																									0.330244	0	1.74144e-12	64.203
A0A0J9YU37;A0A0J9YVI1;A0A0J9YVG2;A0A0J9YUK1;A0A0J9YUP9;A0A0J9YUZ0;E9Q8G4;Q60722-3;Q60722;A0A0J9YU91;A0A0J9YV50;A0A0J9YUX6;A0A0J9YUT7;Q91YV0;A0A0J9YTR9;A0A0J9YUG4;A0A0J9YTU7;A0A0J9YTW1;Q60722-2	310;310;345;345;346;346;392;370;370;155;131;210;241;211;211;241;241;291;211	A0A0J9YU37	A0A0J9YU37	Transcription factor 4	Tcf4		0.489916	0.915705	1.61311e-13	69.422	59.892	64.488					0.401153	0	2.12398e-10	57.922													0.406462	0	1.61311e-13	69.422	0.330244	0	1.74144e-12	64.203					0.443225	0	8.57613e-11	61.37
A0A0J9YU37;A0A0J9YVI1;A0A0J9YVG2;A0A0J9YUK1;A0A0J9YUP9;A0A0J9YUZ0;E9Q8G4;Q60722-3;Q60722;A0A0J9YU91;A0A0J9YV50;A0A0J9YUX6;A0A0J9YUT7;Q91YV0;A0A0J9YTR9;A0A0J9YUG4;A0A0J9YTU7;A0A0J9YTW1;Q60722-2	311;311;346;346;347;347;393;371;371;156;132;211;242;212;212;242;242;292;212	A0A0J9YU37	A0A0J9YU37	Transcription factor 4	Tcf4		0.893915	11.9223	1.07603e-30	90.468	81.868	62.193	0.893915	11.9223	5.55298e-11	62.193	0.401153	0	2.12398e-10	57.922	0.807438	6.40232	5.68904e-15	74.763	0.706003	4.60602	7.50078e-13	67.478	0.728718	5.85476	7.2313e-11	61.736	0.406462	0	1.61311e-13	69.422	0.330244	0	1.74144e-12	64.203	0.820483	6.76711	1.07603e-30	90.468	0.443225	0	8.57613e-11	61.37	0.631764
A0A0J9YU37;A0A0J9YVI1;A0A0J9YVG2;A0A0J9YUK1;A0A0J9YUP9;A0A0J9YUZ0;E9Q8G4;Q60722-3;Q60722;A0A0J9YUS2;A0A0J9YVC6;A0A0J9YV88;A0A0J9YVG8;Q8BPX7;A0A0J9YV39;A0A0J9YV54	66;66;42;42;42;42;88;66;66;66;42;42;42;42;42;66	A0A0J9YU37	A0A0J9YU37	Transcription factor 4	Tcf4		0.913144	10.2842	5.47027e-11	83.849	68.694	56.147													0.913144	10.2842	1.55758e-08	80.236					0	0		NaN					0	0		NaN	0.90495	9.90829	0.000478766	46.3	0.849202
A0A0J9YU52;A0A1D5RLV8;Q8BIL2	175;254;267	A0A0J9YU52	A0A0J9YU52	Myb/SANT-like DNA-binding domain-containing protein 1	Msantd1		1	54.1572	0.0262094	54.549	26.037	54.157	1	54.5493	0.0262094	54.549	1	54.1572	0.0265756	54.157	1	43.2463	0.0496572	43.246	0	0		NaN	0	0		NaN	1	54.5493	0.0262094	54.549	1	51.8544	0.0287258	51.854	1	53.1664	0.0275007	53.166	0	0		NaN	0
A0A0J9YU82;F8WIY7;Q923Q2	293;411;411	A0A0J9YU82	A0A0J9YU82	StAR-related lipid transfer protein 13	Stard13		0.999833	37.7781	1.98777e-71	122.93	109.73	76.391	0.996744	24.8613	6.06215e-20	78.69	0.995083	23.117	2.5209e-08	68.257	0.996873	25.0392	2.01003e-31	77.562	0.999766	36.3011	2.3469e-32	96.163	0.991315	20.6069	2.90387e-08	63.631	0.981663	17.3469	8.89711e-08	61.641	0.999833	37.7781	2.23441e-12	76.391	0.993453	21.8397	3.29191e-31	76.85	0.984145	21.7534	0.000110674	42.813	0.999709
A0A0J9YU82;F8WIY7;Q923Q2	439;557;557	A0A0J9YU82	A0A0J9YU82	StAR-related lipid transfer protein 13	Stard13		0.499028	0	0.0156602	48.823	36.537	48.704	0.497347	0	0.0156602	48.823	0	0		NaN	0.499028	0	0.060612	48.704	0	0		NaN	0	0		NaN					0	0		NaN	0	0		NaN	0	0		NaN	0
A0A0J9YU82;F8WIY7;Q923Q2;Q8K031	454;572;572;477	A0A0J9YU82	A0A0J9YU82	StAR-related lipid transfer protein 13;StAR-related lipid transfer protein 8	Stard13;Stard8		0.998257	28.2055	0.00079357	49.463	37.849	47.037	0.997846	27.0462	0.00272559	43.184	0.997653	26.672	0.00187444	42.809	0	0		NaN	0.997694	29.372	0.00079357	49.463	0	0		NaN					0.998257	28.2055	0.00108714	47.037	0	0		NaN	0	0		NaN	0
A0A0J9YU82;F8WIY7;Q923Q2	312;430;430	A0A0J9YU82	A0A0J9YU82	StAR-related lipid transfer protein 13	Stard13		0.999507	35.4968	0.00296019	80.231	19.321	78.939	0.998033	27.3447	0.00464899	72.325	0.993479	23.8817	0.0106288	56.632	0.999085	31.2006	0.00327992	77.662	0.975469	17.2298	0.0139618	51.436	0.999149	31.2006	0.00327992	77.662	0.99926	31.8077	0.00296019	80.231	0.998359	28.7683	0.00333852	77.192	0.999507	35.4968	0.00312105	78.939	0	0		NaN	0.999379
A0A0J9YU83;F7BJB9	490;563	A0A0J9YU83	A0A0J9YU83		Morc3		1	69.6236	4.04729e-06	80.738	65.947	80.738	0.999975	49.5849	7.86385e-05	60.401	0.999998	58.2969	1.00959e-05	74.141	0.999972	49.7981	0.000154279	56.215	0	0		NaN	0.999997	59.3398	8.63292e-06	69.716	0.999997	56.7974	9.28133e-06	72.433	0.999733	38.1568	0.000596353	47.606	1	69.6236	4.04729e-06	80.738	0.999989	52.8029	3.08081e-05	63.918	0.999772
A0A0J9YUB2;Q3UUG6-2;Q3UUG6	125;468;474	A0A0J9YUB2	A0A0J9YUB2	TBC1 domain family member 24	Tbc1d24		0.330534	0	2.73811e-95	107.83	94.743	107.83					0.330534	0	2.73811e-95	107.83																	0	0		NaN
A0A0J9YUB2;Q3UUG6-2;Q3UUG6	126;469;475	A0A0J9YUB2	A0A0J9YUB2	TBC1 domain family member 24	Tbc1d24		0.330534	0	2.73811e-95	107.83	94.743	107.83					0.330534	0	2.73811e-95	107.83																	0	0		NaN
A0A0J9YUB2;Q3UUG6-2;Q3UUG6	133;476;482	A0A0J9YUB2	A0A0J9YUB2	TBC1 domain family member 24	Tbc1d24		0.998231	30.9771	1.18665e-206	162.85	152.69	128.89	0.769067	11.2253	1.56991e-50	87.203	0.958171	18.7774	2.73811e-95	107.83	0.982188	25.3594	1.01384e-58	91.398	0.998231	30.9771	3.4599e-148	128.89	0.98439	23.7782	2.82834e-129	122.63	0.870614	12.2132	2.30585e-12	54.152	0.419314	2.0891	1.196e-18	63.033	0.990929	23.5752	5.92284e-148	126.68	0.756626	11.0389	3.49602e-81	101.58	0.984801
Q9CRF0;Q9CQN9;A0A0J9YUC9;E9Q1L5;Q8BUH8	12;12;12;12;12	Q9CRF0	Q9CRF0	Sentrin-specific protease 7	Senp7		0.499848	0	0.000198169	63.128	34.115	63.128	0	0		NaN									0.499848	0	0.000198169	63.128																	0	0		NaN
Q9CRF0;Q9CQN9;A0A0J9YUC9;E9Q1L5;Q8BUH8	13;13;13;13;13	Q9CRF0	Q9CRF0	Sentrin-specific protease 7	Senp7		0.499848	0	0.000198169	63.128	34.115	63.128	0	0		NaN									0.499848	0	0.000198169	63.128																	0	0		NaN
B9EJ54;A0A0J9YUD5	1528;1581	B9EJ54	B9EJ54		Nup205		1	40.0015	0.000574638	61.999	10.145	40.002	1	42.109	0.00730563	42.109					1	49.8132	0.0029155	49.813	1	49.8132	0.0029155	49.813	1	42.5986	0.00683743	42.599	1	40.0015	0.0093208	40.002	1	61.9993	0.000574638	61.999	1	50.6068	0.00264871	50.607	1	49.8132	0.0029155	49.813	1
A0A0J9YUJ3;D3Z2L1;Q3UU56;D3Z7I0;Q8BL74	163;163;163;163;163	A0A0J9YUJ3	A0A0J9YUJ3	General transcription factor 3C polypeptide 2	Gtf3c2;Gm29609		1	41.4482	0.000489666	63.408	49.412	41.448	1	61.4352	0.000608658	61.435									1	63.4082	0.000489666	63.408													1	41.2419	0.00813473	41.242	1	41.0291	0.00833825	41.029
A0A0J9YUK4;O55033	90;90	A0A0J9YUK4	A0A0J9YUK4	Cytoplasmic protein NCK2	Nck2		0.978602	16.6602	1.90627e-39	98.165	84.502	85.808	0.900562	9.60503	1.90627e-39	98.165					0.978602	16.6602	3.58698e-23	85.808	0.715957	4.54869	6.30828e-14	71.376	0.887688	9.02749	7.62119e-18	79.97					0.844303	7.68596	1.40105e-17	78.021					0.977209	16.6426	2.01312e-17	76.155
A0A0J9YUS4	30	A0A0J9YUS4	A0A0J9YUS4				0.779171	5.47576	0.000354669	42.633	24.716	42.633													0.779171	5.47576	0.000354669	42.633
A0A0J9YV20;A0A0R4J0B7;Q80UZ2-2;Q80UZ2	584;585;584;585	A0A0J9YV20	A0A0J9YV20	Protein SDA1 homolog	Sdad1		0.992291	24.1136	4.9185e-06	65.25	37.346	65.25	0	0		NaN	0.745308	7.67502	0.000152018	42.711	0	0		NaN	0	0		NaN	0	0		NaN	0	0		NaN	0	0		NaN	0	0		NaN	0	0		NaN	0.992291
A0A0J9YV82;Q921K9	82;108	A0A0J9YV82	A0A0J9YV82	B-cell CLL/lymphoma 7 protein family member B	Bcl7b		0.571237	5.39956	4.21549e-09	53.867	43.897	53.867	0	0		NaN	0	0		NaN					0.571237	5.39956	4.21549e-09	53.867	0	0		NaN	0	0		NaN	0	0		NaN	0	0		NaN	0	0		NaN
A0A0J9YV82;Q921K9	86;112	A0A0J9YV82	A0A0J9YV82	B-cell CLL/lymphoma 7 protein family member B	Bcl7b		0.317474	0.303899	3.82845e-06	45.22	38.66	45.22	0	0		NaN	0.317474	0.303899	3.82845e-06	45.22	0.200857	0.37375	1.52577e-05	42.828					0	0		NaN	0	0		NaN	0	0		NaN	0	0		NaN	0	0		NaN
A0A0J9YV82;Q921K9	88;114	A0A0J9YV82	A0A0J9YV82	B-cell CLL/lymphoma 7 protein family member B	Bcl7b		0.371952	3.37158	5.33277e-09	52.92	46.256	43.501	0.371952	3.37158	4.71106e-05	43.501	0	0		NaN									0.333428	0.682837	5.33277e-09	52.92	0	0		NaN	0	0		NaN	0	0		NaN	0	0		NaN
A0A0J9YV82;Q921K9	92;118	A0A0J9YV82	A0A0J9YV82	B-cell CLL/lymphoma 7 protein family member B	Bcl7b		0.396555	0.682837	5.33277e-09	52.92	46.256	52.92	0.380797	0.792189	4.71106e-05	43.501	0	0		NaN									0.396555	0.682837	5.33277e-09	52.92	0	0		NaN	0	0		NaN	0	0		NaN	0	0		NaN
A0A0J9YV82;Q921K9	96;122	A0A0J9YV82	A0A0J9YV82	B-cell CLL/lymphoma 7 protein family member B	Bcl7b		0.647549	4.66787	4.21549e-09	53.867	43.897	53.867	0	0		NaN	0.526739	4.23433	3.82845e-06	45.22					0.647549	4.66787	4.21549e-09	53.867	0	0		NaN	0	0		NaN	0	0		NaN	0	0		NaN	0	0		NaN
A0A0J9YVG0;Q61074	417;524	A0A0J9YVG0	A0A0J9YVG0	Protein phosphatase 1G	Ppm1g		0.668196	3.04037	2.43826e-08	60.472	53.896	60.472	0.668196	3.04037	2.43826e-08	60.472	0.499801	0	7.13066e-07	52.321	0.499995	0	2.43849e-08	60.464	0	0		NaN	0.499982	0	2.89981e-07	55.469	0	0		NaN	0.499984	0	3.81193e-06	50.498	0.499962	0	3.68524e-05	43.895	0	0		NaN	0
E9QL12;E9PXU9;A0A0N4SUJ2;E9Q423;A0A0N4SWH3;A0A0N4SWG7;A0A0N4SUN3;A0A0N4SVX9;A0A0N4SV63;Q9ESD7-3;Q9ESD7;Q9ESD7-2	193;194;194;224;193;224;194;225;224;194;193;225	E9QL12	E9QL12	Dysferlin	Dysf		0.999869	38.8396	0.000286152	49.627	49.627	49.627	0.999862	38.6049	0.000533771	45.438					0	0		NaN					0	0		NaN									0.999869	38.8396	0.000286152	49.627	0	0		NaN
A0A0N4SUY3;A0A0N4SWF5;A0A0N4SUU0;A0A0N4SWD7;E9Q6H8;A0A0N4SVR9;A0A1L1SQF5;A0A0N4SV65	488;541;868;912;1020;75;347;433	A0A0N4SUY3	A0A0N4SUY3		Plekha5		0.42095	0	6.36213e-06	63.691	51.136	63.691													0.42095	0	6.36213e-06	63.691					0.40321	0	0.000132102	43.208									0.209624	0	3.8083e-05	47.754
A0A0N4SUY3;A0A0N4SWF5;A0A0N4SUU0;A0A0N4SWD7;E9Q6H8;A0A0N4SVR9;A0A1L1SQF5;A0A0N4SV65	493;546;873;917;1025;80;352;438	A0A0N4SUY3	A0A0N4SUY3		Plekha5		0.209624	0	2.0344e-05	49.993	46.09	47.754	0.209453	0	2.0344e-05	49.993																													0.209624	0	3.8083e-05	47.754
A0A0N4SUY3;A0A0N4SWF5;A0A0N4SUU0;A0A0N4SWD7;E9Q6H8;A0A0N4SVR9;A0A1L1SQF5;A0A0N4SV65	494;547;874;918;1026;81;353;439	A0A0N4SUY3	A0A0N4SUY3		Plekha5		0.209453	0	2.0344e-05	49.993	46.09	49.993	0.209453	0	2.0344e-05	49.993
A0A0N4SUY3;A0A0N4SWF5;A0A0N4SUU0;A0A0N4SWD7;E9Q6H8;A0A0N4SUV0;A0A0N4SW19	45;35;335;411;417;302;308	A0A0N4SUY3	A0A0N4SUY3		Plekha5		0.988511	19.347	4.06778e-12	102.66	81.432	102.66	0.965982	14.5325	1.47065e-08	92.856	0.84996	7.53192	3.75232e-05	80.469	0.68964	3.46757	7.97144e-05	69.03	0.89191	9.16537	6.62235e-05	72.089					0.851781	7.59425	0.00062463	57.802					0.840884	7.23021	7.82774e-06	85.554	0.865225	8.0752	0.00131121	52.278	0.988511
D3Z6E4;A0A0N4SUX5;P17183;B0QZL1;A0A0N4SUI6;B1ARR6;D3YVD3;D3Z2S4;P17182;B1ARR7;P21550;Q5SX59;Q5SX60;Q5SX61	37;37;37;37;37;37;37;37;37;37;37;37;37;37	D3Z6E4;B0QZL1;P17182;P21550	P21550	Enolase;Gamma-enolase;Alpha-enolase;Beta-enolase	Eno2;Eno1;Eno3		0.333152	0	3.65924e-06	55.588	43.82	55.588	0.332556	0	4.64067e-05	44.415	0.327766	0	3.94344e-05	44.729	0.331936	0	7.78824e-06	50.787	0.332369	0	4.50683e-06	53.909	0.327766	0	3.94344e-05	44.729	0.32105	0	0.000117758	41.202	0.329802	0	0.000127663	40.756	0.332593	0	4.68695e-06	53.553	0.327766	0	3.94344e-05	44.729	0.333152
D3Z6E4;A0A0N4SUX5;P17183;B0QZL1;A0A0N4SUI6;B1ARR6;D3YVD3;D3Z2S4;P17182;B1ARR7;P21550;Q5SX59;Q5SX60;Q5SX61	40;40;40;40;40;40;40;40;40;40;40;40;40;40	D3Z6E4;B0QZL1;P17182;P21550	P21550	Enolase;Gamma-enolase;Alpha-enolase;Beta-enolase	Eno2;Eno1;Eno3		0.892269	9.18957	6.71051e-58	123.03	112.54	112.8	0.818467	6.7803	1.05038e-25	99.044	0.884763	9.34212	6.71051e-58	123.03	0.758686	6.93056	7.78824e-06	63.145	0.774878	8.03917	1.37994e-19	91.457	0.783133	8.58692	7.03587e-14	82.707	0.876136	9.10812	9.13051e-43	111.06	0.622846	2.22451	5.7586e-33	102.58	0.892269	9.18957	2.23771e-43	112.8	0.867709	9.02792	1.58222e-42	109.38	0.617977
D3Z6E4;A0A0N4SUX5;P17183;P17182;Q6PHC1;P21550;J3QPZ9	254;330;373;373;305;373;154	D3Z6E4;P17182;P21550	P21550	Enolase;Gamma-enolase;Alpha-enolase;Beta-enolase	Eno2;Eno1;Eno3		0.958466	16.653	9.78188e-08	55.526	51.631	43.494	0	0		NaN	0	0		NaN					0	0		NaN	0	0		NaN	0.918013	12.0313	9.78188e-08	55.526									0.958466	16.653	7.38729e-07	52.784	0
A0A0N4SV79;E9PZ28;Q08874-6;Q08874-5;Q08874-9;Q08874-8;Q08874-3;Q08874-7;Q08874-2;Q08874-4;Q08874	322;466;314;339;378;384;384;419;435;475;491	A0A0N4SV79	A0A0N4SV79	Microphthalmia-associated transcription factor	Mitf		0.664326	3.23227	1.53553e-07	43.723	41.317	43.723																	0.664326	3.23227	1.53553e-07	43.723	0	0		NaN
A0A0N4SV79;E9PZ28;Q08874-6;Q08874-5;Q08874-9;Q08874-8;Q08874-3;Q08874-7;Q08874-2;Q08874-4;Q08874	335;479;327;352;391;397;397;432;448;488;504	A0A0N4SV79	A0A0N4SV79	Microphthalmia-associated transcription factor	Mitf		0.85026	9.95597	1.53553e-07	43.723	41.317	43.723																	0.85026	9.95597	1.53553e-07	43.723	0	0		NaN
A0A0N4SVC2;E9QP00;Q6PFR5;F8WJG3;P62996	258;260;259;164;264	A0A0N4SVC2;F8WJG3	A0A0N4SVC2	Transformer-2 protein homolog alpha;Transformer-2 protein homolog beta	Tra2a;Tra2b		0.999888	41.3413	0.000570062	62.891	54.378	62.891	0.995937	25.3752	0.0120405	45.115	0	0		NaN	0	0		NaN	0.998873	31.7944	0.000570062	58.676	0	0		NaN	0.999888	41.3413	0.00238856	62.891	0.99832	35.2233	0.0200296	40.589	0.999217	34.9873	0.00854541	48.704					0
A0A0N4SVC2;E9QP00;Q6PFR5;F8WJG3;P62996	260;262;261;166;266	A0A0N4SVC2;F8WJG3	A0A0N4SVC2	Transformer-2 protein homolog alpha;Transformer-2 protein homolog beta	Tra2a;Tra2b		0.997513	28.5053	0.000570062	62.891	54.378	62.891	0.939949	13.5895	0.0120405	45.115	0	0		NaN	0	0		NaN	0.997096	29.0727	0.000570062	58.676	0	0		NaN	0.997513	28.5053	0.00238856	62.891	0.977658	18.5433	0.0200296	40.589	0.973949	16.8768	0.00854541	48.704					0
A0A0N4SVD1;Q9CW79-2;Q9CW79	75;726;751	A0A0N4SVD1	A0A0N4SVD1	Golgin subfamily A member 1	Golga1		0.949116	12.7202	0.00134324	51.726	31.601	51.726	0.949116	12.7202	0.00134324	51.726					0	0		NaN	0	0		NaN													0	0		NaN	0	0		NaN
A0A0N4SVK8	1587	A0A0N4SVK8	A0A0N4SVK8				0.999996	54.3683	5.12807e-59	125.04	113.73	111.38	0.999996	53.4996	2.1027e-43	111.49	0.999987	48.7542	5.26911e-20	90.308	0.999996	54.2443	1.51185e-33	102.9	0.999996	54.3683	2.2279e-43	111.38	0.999848	38.1907	7.41459e-34	105.06	0.999893	39.7194	2.10631e-14	82.36	0.999965	44.5956	2.08993e-26	99.603	0.999896	39.8108	5.12807e-59	125.04	0.999646	34.5081	5.43626e-10	76.817	0.998504
A0A0N4SVK8;Q8BGK2;E9Q4C0	48;48;48	A0A0N4SVK8	A0A0N4SVK8	[Protein ADP-ribosylarginine] hydrolase-like protein 1	Adprhl1		0.999894	39.8186	3.3853e-05	73.022	59.059	73.022																					0	0		NaN	0.994499	22.6002	0.000410738	57.804	0.999894	39.8186	3.3853e-05	73.022
A2AMI6;Z4YKC4;A0A0R4J112;A2AMI2;A0A0N4SVL0;Q80XI3-2;Q80XI3-4;Q80XI3;Q80XI3-3	250;247;258;240;423;240;258;240;251	A2AMI6	A2AMI6	Eukaryotic translation initiation factor 4 gamma 3	Eif4g3		1	50.8046	0.0432542	50.805	7.3625	50.805	0	0		NaN									1	50.8046	0.0432542	50.805					0	0		NaN
A2AMI6;Z4YKC4;A0A0R4J112;A2AMI2;A0A0N4SVL0;Q80XI3-2;Q80XI3-4;Q80XI3;Q80XI3-3	277;274;285;267;450;267;285;267;278	A2AMI6	A2AMI6	Eukaryotic translation initiation factor 4 gamma 3	Eif4g3		0.998811	32.6637	4.78639e-12	97.214	81.675	97.214	0.994445	26.3072	1.06589e-05	84.479	0.998501	31.6129	5.82984e-06	86.313	0.998811	32.6637	4.78639e-12	97.214	0.990482	24.2571	8.0159e-05	74.611	0.993555	25.7762	7.69166e-05	77.062	0.979863	20.2431	8.61519e-05	75.695	0.983082	21.0875	8.61519e-05	75.695	0.997368	28.9138	4.19367e-08	89.403	0.998548	31.7959	3.06289e-06	87.363	0.982618
A0A0N4SVL8;G3UVV6;B2RPV6-2;B2RPV6	141;141;141;141	A0A0N4SVL8	A0A0N4SVL8	Multimerin-1	Mmrn1		0.946116	12.4448	0.0297136	60.019	43.821	60.019																	0.946116	12.4448	0.0297136	60.019
A0A0N4SW22;A0A0N4SVN2;A0A0N4SWH7;P11881-8;P11881-7;P11881-6;P11881-5;P11881-4;P11881-2;P11881-3;P11881	83;141;91;1700;1715;1723;1738;1739;1740;1754;1755	A0A0N4SW22	A0A0N4SW22	Inositol 1,4,5-trisphosphate receptor type 1	Itpr1		0.614073	5.0286	2.60479e-16	55.667	47.603	55.667									0.332745	0	6.31312e-08	42.571					0.614073	5.0286	2.60479e-16	55.667					0.333244	0	4.58501e-08	43.24					0.332819	0	5.05588e-12	50.66	0.611819
A0A0N4SW22;A0A0N4SVN2;A0A0N4SWH7;P11881-8;P11881-7;P11881-6;P11881-5;P11881-4;P11881-2;P11881-3;P11881	86;144;94;1703;1718;1726;1741;1742;1743;1757;1758	A0A0N4SW22	A0A0N4SW22	Inositol 1,4,5-trisphosphate receptor type 1	Itpr1		0.372018	0.737131	1.0217e-30	67.198	49.982	67.198									0.332745	0	6.31312e-08	42.571	0.372018	0.737131	1.0217e-30	67.198									0.333244	0	4.58501e-08	43.24					0.332819	0	5.05588e-12	50.66
A0A0N4SVQ1;Q62425	34;67	A0A0N4SVQ1	A0A0N4SVQ1	Cytochrome c oxidase subunit NDUFA4	Ndufa4		0.999929	42.6858	1.84828e-05	83.182	71.963	83.182	0.999392	32.1831	0.000178699	75.695	0.999391	35.097	0.00162509	55.401	0.999874	42.7578	0.000517415	69.451	0.998919	33.4423	0.00107801	60.49	0.997963	28.7035	0.00244599	52.693	0.999733	36.3311	0.000386985	71.555	0.998104	27.2458	0.000386985	71.555	0.999324	31.8436	0.00074336	67.385	0.999521	34.7766	0.000430775	70.685	0.999929
A0A0N4SVQ1;Q62425	40;73	A0A0N4SVQ1	A0A0N4SVQ1	Cytochrome c oxidase subunit NDUFA4	Ndufa4		0.998125	27.7852	0.000617493	68.536	59.581	60.598	0.988577	21.7375	0.00503286	46.592	0.998125	27.7852	0.00108052	60.598	0.991582	22.0323	0.00439517	47.971	0.980039	18.9532	0.0288905	43.897	0.997635	26.9958	0.000617493	68.536					0.990273	20.23	0.00458584	47.559	0.991781	21.2692	0.00498023	46.706					0
F7BP94;A0A0N4SVS8;Q8QZV7	150;247;626	F7BP94	F7BP94	Protein asunder homolog	Asun		0.920482	12.4628	4.32959e-05	41.661	34.549	41.661					0	0		NaN					0	0		NaN	0	0		NaN	0	0		NaN	0	0		NaN					0.920482	12.4628	4.32959e-05	41.661
A0A0N4SVT3;A0A0N4SW28;Q9DAS9	49;60;49	A0A0N4SVT3	A0A0N4SVT3	Guanine nucleotide-binding protein G(I)/G(S)/G(O) subunit gamma-12	Gng12		0.999996	57.5205	0.000119449	58.21	47.576	58.21	0	0		NaN					0	0		NaN					0	0		NaN	0	0		NaN	0	0		NaN	0	0		NaN	0	0		NaN	0.999996
A0A0N4SVT3;A0A0N4SW28;Q9DAS9	10;10;10	A0A0N4SVT3	A0A0N4SVT3	Guanine nucleotide-binding protein G(I)/G(S)/G(O) subunit gamma-12	Gng12		0.996941	25.779	3.4361e-11	103.91	69.217	88.187	0.692321	6.04982	0.000133575	70.488	0.94863	13.2438	3.96495e-11	96.64	0.969969	15.285	1.01691e-05	83.182	0.996941	25.779	6.89065e-07	88.187	0.69521	6.0176	9.763e-06	83.397	0.946934	15.0879	0.000133575	70.488	0.97933	19.8089	0.000550015	62.408	0.994328	24.9648	6.98815e-08	89.403	0.996185	24.2504	3.4361e-11	103.91	0.97422
A0A0N4SVZ5;Q8BXN7	18;248	A0A0N4SVZ5	A0A0N4SVZ5	Protein phosphatase 1K, mitochondrial	Ppm1k		1	54.5979	6.46472e-26	97.32	88.93	54.598	1	96.4871	7.9542e-26	96.487	1	54.5979	3.43231e-07	70.094	1	72.8979	1.49181e-10	80.975	1	90.827	1.64615e-19	90.827	1	85.9738	9.89062e-15	85.974	1	74.7892	2.32572e-10	80.238	1	44.601	4.97101e-10	77.899	1	65.0384	6.46472e-26	97.32	1	48.0038	3.10538e-08	75.55	1
A0A0N4SW62;Q3TWL5;A0A0N4SW06;Q91WI7;Q91WI7-2	104;104;72;104;104	A0A0N4SW62	A0A0N4SW62	Integrin-alpha FG-GAP repeat-containing protein 2	Itfg2		0.99908	30.3597	8.64438e-09	66.3	49.275	66.3																	0.99908	30.3597	8.64438e-09	66.3					0.823797	6.69807	2.07306e-05	44.258
A0A0N4SW73	930	A0A0N4SW73	A0A0N4SW73				1	59.2813	8.59058e-09	65.425	46.389	59.281	1	49.2502	7.26532e-06	49.25	0	0		NaN	0	0		NaN	1	60.4635	8.59058e-09	60.464	0	0		NaN	0	0		NaN	1	59.2813	2.02308e-08	59.281	1	59.3238	2.02214e-08	59.324	1	43.1624	3.59821e-05	43.162	1
A0A0N4SW73	626	A0A0N4SW73	A0A0N4SW73				0.999995	53.2117	0.000614171	61.344	51.357	61.344	0.999993	51.8451	0.000679829	60.255	0.999995	53.2117	0.000614171	61.344	0.999881	39.2352	0.00450759	45.077	0.999768	36.3463	0.00367332	47.559	0.999986	48.4377	0.00160969	54.471	0.99971	35.3711	0.00898606	40.352	0.999567	33.6344	0.00468737	44.847	0	0		NaN	0.999768	36.3463	0.00367332	47.559
A0A0N4SW73	693	A0A0N4SW73	A0A0N4SW73				1	54.6997	4.63378e-06	89.548	65.697	54.7	1	89.3005	4.7732e-06	89.301	1	54.6997	0.00540119	54.7	1	72.34	0.00102141	72.34	1	81.6249	0.000106201	81.625	1	57.1641	0.00320538	57.164	1	81.9197	8.69465e-05	81.92	1	65.3952	0.00282467	65.395	1	76.3258	0.000452314	76.326	1	89.5479	4.63378e-06	89.548	1
A0A0N4SW73;Q8R361	480;480	A0A0N4SW73	A0A0N4SW73	Rab11 family-interacting protein 5	Rab11fip5		0.990054	20.0562	6.56161e-10	76.492	66.352	61.767	0.980052	16.9182	6.56161e-10	76.492	0	0		NaN	0	0		NaN	0.982383	19.4333	2.57777e-06	68.944	0	0		NaN	0.987569	19.606	3.18412e-06	56.529	0	0		NaN	0.971671	15.3591	2.45142e-06	65.784	0	0		NaN	0
A0A0N4SW73;Q8R361	482;482	A0A0N4SW73	A0A0N4SW73	Rab11 family-interacting protein 5	Rab11fip5		0.583541	1.49158	7.41312e-06	52.03	38.617	52.03	0	0		NaN	0	0		NaN	0	0		NaN	0.583541	1.49158	7.41312e-06	52.03	0	0		NaN					0	0		NaN	0	0		NaN	0	0		NaN	0
A0A0N4SW73;Q8R361	486;486	A0A0N4SW73	A0A0N4SW73	Rab11 family-interacting protein 5	Rab11fip5		0.982644	20.0406	2.62073e-06	65.454	49.862	65.454	0.982644	20.0406	2.62073e-06	65.454	0	0		NaN	0	0		NaN	0.901856	13.398	4.57259e-06	53.779	0	0		NaN	0.907958	14.7982	3.35172e-06	62.19	0	0		NaN	0.852972	13.3548	3.16111e-06	60.747	0	0		NaN	0
A0A0N4SW73;Q8R361	490;490	A0A0N4SW73	A0A0N4SW73	Rab11 family-interacting protein 5	Rab11fip5		0.328654	0	0.000108584	41.615	35.584	41.521	0	0		NaN	0	0		NaN	0	0		NaN	0.328654	0	0.000110665	41.521	0	0		NaN					0	0		NaN	0.256472	0	0.000108584	41.615	0	0		NaN	0
A0A0N4SW73;Q8R361	491;491	A0A0N4SW73	A0A0N4SW73	Rab11 family-interacting protein 5	Rab11fip5		0.328654	0	0.000108584	41.615	35.584	41.521	0	0		NaN	0	0		NaN	0	0		NaN	0.328654	0	0.000110665	41.521	0	0		NaN					0	0		NaN	0.256472	0	0.000108584	41.615	0	0		NaN	0
A0A0N4SW73;Q8R361	356;356	A0A0N4SW73	A0A0N4SW73	Rab11 family-interacting protein 5	Rab11fip5		0.495062	0	2.80631e-50	102.78	93.757	102.78	0.481492	0	1.15772e-14	74.123	0.486096	0	3.32565e-40	99.838	0.495062	0	2.80631e-50	102.78	0.491345	0	1.089e-39	97.346	0.489353	0	3.60601e-14	69.981	0.490917	0	1.09939e-14	74.222	0.489503	0	1.02395e-30	91.767	0.483885	0	3.39371e-50	101.86	0.492279	0	2.24593e-23	84.674	0.490154
A0A0N4SW73;Q8R361	357;357	A0A0N4SW73	A0A0N4SW73	Rab11 family-interacting protein 5	Rab11fip5		0.495062	0	2.80631e-50	102.78	93.757	102.78	0.481492	0	1.15772e-14	74.123	0.486096	0	3.32565e-40	99.838	0.495062	0	2.80631e-50	102.78	0.491345	0	1.089e-39	97.346	0.489353	0	3.60601e-14	69.981	0.490917	0	1.09939e-14	74.222	0.489503	0	1.02395e-30	91.767	0.483885	0	3.39371e-50	101.86	0.492279	0	2.24593e-23	84.674	0.490154
A0A0N4SW73;Q8R361	359;359	A0A0N4SW73	A0A0N4SW73	Rab11 family-interacting protein 5	Rab11fip5		0.737277	7.73058	6.87168e-07	51.819	36.876	51.819	0.737277	7.73058	6.87168e-07	51.819					0	0		NaN					0.333176	0	1.70481e-05	44.788	0	0		NaN	0	0		NaN	0.332368	0	7.28651e-06	49.34	0	0		NaN	0
A0A0N4SW73;Q8R361	1313;640	A0A0N4SW73	A0A0N4SW73	Rab11 family-interacting protein 5	Rab11fip5		0.894216	9.86865	0.000248944	44.847	33.803	44.564									0	0		NaN	0.752434	5.97257	0.000248944	44.847																					0.894216
A0A0N4SW73	890	A0A0N4SW73	A0A0N4SW73				0.988509	19.4368	3.0616e-111	127.83	109.33	112.39	0.831564	6.91651	5.83311e-72	111.79	0.835426	7.10464	7.0784e-59	105.46	0.988509	19.4368	2.04269e-72	112.39	0.961024	13.9146	5.37016e-59	104.87	0.735771	4.44215	4.1844e-29	85.537	0.761004	5.0447	6.66246e-38	90.097	0.808236	6.23642	2.51478e-47	97.819	0.95205	12.9128	7.76502e-37	92.198	0.858782	7.84182	4.32005e-38	91.722	0.87624
A0A0N4SW73;Q8R361	176;176	A0A0N4SW73	A0A0N4SW73	Rab11 family-interacting protein 5	Rab11fip5		0.980457	17.4814	5.84211e-06	82.543	72.217	72.089	0.980172	17.1326	2.62654e-05	78.486	0.980457	17.4814	3.22775e-05	72.089	0.88078	8.70148	0.000266804	60.628	0.756601	5.02141	0.000632149	55.314	0.920673	10.9642	0.000151486	62.891	0.965842	17.5244	0.000189742	62.14	0.92587	11.194	5.84211e-06	82.543	0.978951	17.2389	1.54742e-05	80.522					0.963435
A0A0N4SW73	1186	A0A0N4SW73	A0A0N4SW73				0.471008	0	1.51621e-32	71.149	60.442	71.149	0.471008	0	1.51621e-32	71.149	0	0		NaN					0	0		NaN	0	0		NaN	0.454018	0	6.21912e-08	45.269					0	0		NaN	0	0		NaN	0
A0A0N4SW73	1188	A0A0N4SW73	A0A0N4SW73				0.471008	0	1.51621e-32	71.149	60.442	71.149	0.471008	0	1.51621e-32	71.149	0	0		NaN					0	0		NaN	0	0		NaN	0.454018	0	6.21912e-08	45.269					0	0		NaN	0	0		NaN	0
A0A0N4SW73;Q8R361	1203;530	A0A0N4SW73	A0A0N4SW73	Rab11 family-interacting protein 5	Rab11fip5		0.999952	43.168	8.86389e-25	68.326	63.167	58.09	0	0		NaN	0	0		NaN	0.999663	34.7221	8.86389e-25	68.326	0	0		NaN	0.999855	38.3835	3.42333e-05	64.507	0	0		NaN					0.999952	43.168	8.0955e-05	58.09	0	0		NaN	0
A0A0N4SW73;Q8R361	474;474	A0A0N4SW73	A0A0N4SW73	Rab11 family-interacting protein 5	Rab11fip5		0.990593	22.5705	5.03769e-06	46.968	40.17	46.968									0	0		NaN	0.990593	22.5705	5.03769e-06	46.968																					0
A0A0N4SW73;Q8R361	307;307	A0A0N4SW73	A0A0N4SW73	Rab11 family-interacting protein 5	Rab11fip5		0.99998	51.2215	7.27672e-08	112.13	83.32	100.72	0.99973	39.0886	6.81695e-07	99.522	0.999946	45.7234	2.70273e-06	86.313	0.999977	47.6868	7.27672e-08	112.13	0.999733	38.3088	8.66147e-06	86.313	0.999601	36.2711	5.36582e-06	87.363	0.999914	43.762	1.36456e-06	90.653	0.99998	51.2215	7.05944e-07	100.72	0.999674	37.8625	5.36582e-06	87.363	0.999815	40.4016	1.35841e-06	90.685	0.999769
A0A0N4SW73;Q8R361	278;278	A0A0N4SW73	A0A0N4SW73	Rab11 family-interacting protein 5	Rab11fip5		0.862217	8.1514	3.4802e-05	70.529	45.564	70.529	0	0		NaN	0	0		NaN													0	0		NaN					0	0		NaN	0.59306	1.78452	0.000598106	46.156	0.862217
A0A0N4SW73;Q8R361	280;280	A0A0N4SW73	A0A0N4SW73	Rab11 family-interacting protein 5	Rab11fip5		0.979666	16.873	2.75215e-10	90.707	66.282	90.707	0	0		NaN	0	0		NaN	0.975721	17.4363	3.61059e-05	70.26	0.979666	16.873	2.75215e-10	90.707	0.851528	8.45304	0.00178535	46.964	0.832605	7.02988	0.00106598	49.988	0.869223	8.28511	0.0010148	49.929	0.964573	15.5015	0.000486183	55.186					0.777013
A0A0N4SW73;Q8R361	282;282	A0A0N4SW73	A0A0N4SW73	Rab11 family-interacting protein 5	Rab11fip5		0.519675	0.800213	2.03446e-06	77.068	60.718	49.988	0	0		NaN	0	0		NaN	0.25477	0	0.000906341	42.277									0.519675	0.800213	0.00106598	49.988					0.461205	1.09999	2.03446e-06	77.068					0
A0A0N4SW73;Q8R361	283;283	A0A0N4SW73	A0A0N4SW73	Rab11 family-interacting protein 5	Rab11fip5		0.931776	12.8457	2.75215e-10	90.707	66.282	70.26	0	0		NaN	0	0		NaN	0.931776	12.8457	3.61059e-05	70.26	0.794086	5.95372	2.75215e-10	90.707	0.825837	7.45514	0.00178535	46.964	0	0		NaN					0.762014	5.7043	0.000486183	55.186					0.811831
A0A0N4SW73;Q8R361	243;243	A0A0N4SW73	A0A0N4SW73	Rab11 family-interacting protein 5	Rab11fip5		0.350559	0	2.02562e-12	48.546	44.02	48.546																																					0.350559
A0A0N4SW73;Q8R361	244;244	A0A0N4SW73	A0A0N4SW73	Rab11 family-interacting protein 5	Rab11fip5		0.350559	0	2.02562e-12	48.546	44.02	48.546																																					0.350559
A0A0N4SW73;Q8R361	1212;539	A0A0N4SW73	A0A0N4SW73	Rab11 family-interacting protein 5	Rab11fip5		0.498507	0	0.000309568	68.83	47.96	65.043	0.490232	0	0.00141681	62.042	0.497819	0	0.000309568	68.83	0.477359	0	0.00172445	61.212	0.467894	0	0.00231937	59.607	0.485759	0	0.00568146	53.754	0	0		NaN	0	0		NaN	0.46924	0	0.00201301	60.434	0.493271	0	0.00279663	58.32	0.494479
A0A0N4SW73	1003	A0A0N4SW73	A0A0N4SW73				0.738189	7.57717	6.19236e-07	87.298	73.091	62.891	0.468015	0	6.19236e-07	87.298	0.461207	0	0.000104364	65.563	0.46553	0	0.000508221	67.726	0.615219	3.46497	0.000155613	62.891	0.472831	0	0.0014372	61.353	0.486785	0	1.96476e-06	84.658	0.738189	7.57717	0.000155613	62.891	0	0		NaN	0	0		NaN	0.47459
A0A0N4SW73	702	A0A0N4SW73	A0A0N4SW73				0.930465	11.4563	6.24281e-44	81.718	76.861	60.574	0.64924	2.76875	1.06736e-12	54.011	0.896465	10.0166	2.82387e-07	44.674	0	0		NaN					0.897496	9.43666	4.09332e-18	58.867	0	0		NaN									0.801362	6.09729	1.74047e-12	51.848	0.926164
A0A0N4SW73	705	A0A0N4SW73	A0A0N4SW73				0.546678	0.885015	3.48263e-33	72.792	65.839	72.792									0	0		NaN	0.544126	0.891986	1.92928e-12	51.242					0	0		NaN	0.419076	0.271998	3.07759e-07	44.641	0.546678	0.885015	3.48263e-33	72.792
A0A0N4SW76;E0CY23;P48722-2;P48722	74;74;53;74	A0A0N4SW76	A0A0N4SW76	Heat shock 70 kDa protein 4L	Hspa4l		1	79.5739	2.52719e-06	87.216	75.045	85.522	1	83.6548	3.10612e-06	86.911	1	79.5739	5.73752e-06	85.522	0	0		NaN									0.99991	40.4447	0.0334267	42.843					0	0		NaN	0	0		NaN	0.999872
A0A0N4SW93	866	A0A0N4SW93	A0A0N4SW93				0.873491	8.39208	4.71883e-05	79.633	67.785	79.633					0	0		NaN					0	0		NaN													0	0		NaN					0
A0A0N4SW94;O35682	15;15	A0A0N4SW94	A0A0N4SW94	Myeloid-associated differentiation marker	Myadm		0.479704	2.39041	1.37379e-32	103.39	89.969	101.78	0.479704	2.39041	1.96002e-32	101.78	0.237049	0	3.01994e-05	62.377					0.248591	0	1.27752e-13	84.874	0.44724	0	1.37379e-32	103.39	0.197562	0	2.01384e-06	72.175					0.345572	0	3.66873e-09	78.69					0.376191
A0A0N4SW94;O35682	16;16	A0A0N4SW94	A0A0N4SW94	Myeloid-associated differentiation marker	Myadm		0.44724	0	1.37379e-32	103.39	89.969	103.39					0.237049	0	3.01994e-05	62.377									0.44724	0	1.37379e-32	103.39	0.197562	0	2.01384e-06	72.175					0.345572	0	3.66873e-09	78.69
A0A0N4SW94;O35682	17;17	A0A0N4SW94	A0A0N4SW94	Myeloid-associated differentiation marker	Myadm		0.319564	0.323008	1.27752e-13	84.874	71.918	78.069					0.237049	0	3.01994e-05	62.377					0.248591	0	1.27752e-13	84.874					0.197562	0	2.01384e-06	72.175	0.319564	0.323008	4.30055e-09	78.069
A0A0N4SWA4;Q9ES18	7;7	A0A0N4SWA4	A0A0N4SWA4	Forkhead box protein J2	Foxj2		0.329821	0	6.48718e-09	67.275	62.292	67.275	0	0		NaN	0	0		NaN	0	0		NaN	0.249786	0	1.1167e-05	44.816	0.329821	0	6.48718e-09	67.275	0	0		NaN					0.249307	0	1.1167e-05	44.816	0.317273	0	9.78849e-09	60.034	0.249667
A0A0N4SWA4;Q9ES18	8;8	A0A0N4SWA4	A0A0N4SWA4	Forkhead box protein J2	Foxj2		0.743804	7.18944	2.132e-41	102.08	94.301	95.264	0	0		NaN	0	0		NaN	0	0		NaN	0.249786	0	1.1167e-05	44.816	0.329821	0	6.48718e-09	67.275	0	0		NaN					0.249307	0	1.1167e-05	44.816	0.317273	0	9.78849e-09	60.034	0.717287
A0A0N4SWA4;Q9ES18	11;11	A0A0N4SWA4	A0A0N4SWA4	Forkhead box protein J2	Foxj2		0.249786	0	7.67165e-06	46.702	43.209	44.816	0	0		NaN	0	0		NaN	0	0		NaN	0.249786	0	1.1167e-05	44.816					0	0		NaN					0.249307	0	1.1167e-05	44.816	0	0		NaN	0.249667
A0A0N4SWB9;Q69ZZ6-3;Q69ZZ6-2;F8WJ98;Q69ZZ6	226;85;230;446;405	A0A0N4SWB9;F8WJ98	F8WJ98	Transmembrane and coiled-coil domains protein 1	Tmcc1		0.637639	4.83075	0.000278542	60.398	45.904	60.398																									0.637639	4.83075	0.000278542	60.398
A0A0N4SWB9;Q69ZZ6-3;Q69ZZ6-2;F8WJ98;Q69ZZ6	230;89;234;450;409	A0A0N4SWB9;F8WJ98	F8WJ98	Transmembrane and coiled-coil domains protein 1	Tmcc1		0.757705	4.956	1.47681e-21	115.14	95.35	82.85	0.461001	0	0.000131491	63.283	0.757705	4.956	5.54188e-06	82.85	0.724574	4.70349	1.71059e-06	86.772	0.74928	4.76082	3.08516e-17	102.62	0.649816	2.70652	1.47681e-21	115.14	0.49092	0	4.30419e-09	93.011					0.543617	0.773634	1.50829e-09	94.122	0.534417	2.06229	3.66709e-05	76.522
A0A0N4SWB9;Q69ZZ6-3;Q69ZZ6-2;F8WJ98;Q69ZZ6	231;90;235;451;410	A0A0N4SWB9;F8WJ98	F8WJ98	Transmembrane and coiled-coil domains protein 1	Tmcc1		0.871679	8.45016	1.18373e-18	110.38	91.108	70.1	0.461001	0	0.000131491	63.283																	0.49092	0	4.30419e-09	93.011													0.746501
A0A0N4SWB9;Q69ZZ6-3;Q69ZZ6-2;F8WJ98;Q69ZZ6	199;58;203;419;378	A0A0N4SWB9;F8WJ98	F8WJ98	Transmembrane and coiled-coil domains protein 1	Tmcc1		1	111.855	1.39794e-21	136.96	120.81	111.86	1	121.021	1.59822e-17	121.02	1	111.855	2.55419e-12	111.86	1	89.266	7.16866e-08	89.266	1	136.957	1.39794e-21	136.96	1	107.344	1.01309e-11	107.34	1	122.691	1.12585e-17	122.69	1	98.8983	4.84143e-11	98.898	1	120.77	1.66918e-17	120.77	1	83.1372	1.02543e-05	83.137	1
A0A0N4SWB9	6	A0A0N4SWB9	A0A0N4SWB9				0.433989	0	0.0055037	43.382	29.176	43.382	0	0		NaN	0	0		NaN					0.433989	0	0.0055037	43.382	0	0		NaN
A0A0N4SWB9	7	A0A0N4SWB9	A0A0N4SWB9				0.505514	1.30016	0.0055037	43.382	29.176	40.725	0	0		NaN	0	0		NaN	0.505514	1.30016	0.00924989	40.725	0.433989	0	0.0055037	43.382	0	0		NaN
Q8CDV2;Q9D5W0;E9Q7V6;A0A0N4SWG4;Q64338-2;Q64338-1;Q64338	440;431;459;528;468;468;468	Q8CDV2	Q8CDV2	Calcium/calmodulin-dependent 3',5'-cyclic nucleotide phosphodiesterase 1C	Pde1c		0.489697	0	0.0149905	40.066	13.097	40.066	0	0		NaN	0	0		NaN	0	0		NaN	0.489697	0	0.0149905	40.066	0	0		NaN					0	0		NaN	0	0		NaN	0	0		NaN	0
Q8CDV2;Q9D5W0;E9Q7V6;A0A0N4SWG4;Q64338-2;Q64338-1;Q64338	441;432;460;529;469;469;469	Q8CDV2	Q8CDV2	Calcium/calmodulin-dependent 3',5'-cyclic nucleotide phosphodiesterase 1C	Pde1c		0.992915	21.6349	5.57602e-18	108.58	90.443	108.58	0.851418	7.74364	6.41975e-13	98.439	0.849314	7.69127	1.0685e-05	76.588	0.992915	21.6349	5.57602e-18	108.58	0.808515	6.54454	1.11055e-05	83.633	0.818865	7.45817	1.01899e-05	74.338	0.852134	7.61827	9.78918e-06	73.498	0.83238	7.02435	1.19639e-05	68.845	0.856399	7.88033	4.83362e-07	86.772	0.836067	8.04837	9.68504e-06	73.279	0.84935
A0A0R3P9C8;Q9DC69	169;173	A0A0R3P9C8	A0A0R3P9C8	NADH dehydrogenase [ubiquinone] 1 alpha subcomplex subunit 9, mitochondrial	Ndufa9		0.99637	24.3847	5.3269e-05	66.246	43.771	63.894	0	0		NaN	0.989936	19.9285	5.3269e-05	66.246	0.991819	20.8362	0.000660044	49.188	0.99637	24.3847	7.66023e-05	63.894	0	0		NaN					0	0		NaN	0	0		NaN	0	0		NaN	0
A0A0R4IZW6;G3X9U5;Q99J78	449;461;437	A0A0R4IZW6	A0A0R4IZW6	Differentially expressed in FDCP 8	Def8		1	41.6438	0.00875425	41.644	33.062	41.644	0	0		NaN					0	0		NaN	0	0		NaN	0	0		NaN									0	0		NaN	0	0		NaN	1
A0A0R4IZW8;O88456	6;6	A0A0R4IZW8	A0A0R4IZW8	Calpain small subunit 1	Capns1		1	43.5122	0.000416602	76.228	60.09	43.512	1	43.2819	0.00493854	43.282					1	60.5185	0.000925397	60.518	1	49.3505	0.00232523	49.35	1	76.2278	0.000416602	76.228													1	52.7897	0.00148266	52.79	1
A0A0R4IZX7;Q8CDB0-2;Q8CDB0	399;237;446	A0A0R4IZX7	A0A0R4IZX7	MAP kinase-interacting serine/threonine-protein kinase 2	Mknk2		0.926497	11.1674	0.0322929	43.69	21.492	43.69																																					0.926497
A0A0R4IZZ6;Q6ZQ03-2;Q6ZQ03-3;Q6ZQ03	65;19;19;19	A0A0R4IZZ6	A0A0R4IZZ6	Formin-binding protein 4	Fnbp4		1	60.5499	4.64127e-05	66.285	55.072	60.55	1	48.1115	0.000669368	48.112	1	60.5499	0.000126128	60.55					0	0		NaN									1	50.1551	0.000498239	50.155
Q9JHL1-2;A0A0R4J006	4;4	Q9JHL1-2	Q9JHL1-2				0.33245	0	3.65694e-33	70.986	65.612	63.305	0	0		NaN									0.329891	0	6.62566e-25	64.936	0.323168	0	1.78535e-18	60.574					0.308658	0	9.33967e-09	47.429	0.33245	0	3.65694e-33	70.986	0.316991	0	7.93457e-19	62.285	0.329504
Q9JHL1-2;A0A0R4J006	7;7	Q9JHL1-2	Q9JHL1-2				0.444892	0	3.65694e-33	70.986	65.612	44.596	0	0		NaN									0.329891	0	6.62566e-25	64.936	0.323168	0	1.78535e-18	60.574					0.308658	0	9.33967e-09	47.429	0.33245	0	3.65694e-33	70.986	0.316991	0	7.93457e-19	62.285	0.444892
A0A0R4J007;P70261	89;89	A0A0R4J007	A0A0R4J007	Paladin	Pald1		0.999064	30.2847	5.65641e-14	85.737	77.243	85.737	0.641575	2.53214	0.000199053	44.054					0	0		NaN	0.999064	30.2847	5.65641e-14	85.737	0.908451	9.9668	1.47649e-06	71.148	0.879414	8.63758	0.00013233	45.069					0	0		NaN	0	0		NaN	0
A0A0R4J008;P70288	394;394	A0A0R4J008	A0A0R4J008	Histone deacetylase 2	Hdac2		1	42.6587	3.38484e-83	100.06	89.421	42.659	1	50.0288	2.55679e-11	50.029	1	42.6587	5.58872e-22	59.573	1	63.901	3.43982e-50	77.566	1	42.8279	3.67592e-15	52.122	1	48.0878	5.26098e-22	57.825	1	43.4779	3.38484e-83	100.06	1	45.4702	3.60638e-16	55.884	1	48.7596	4.87557e-22	60.093	1	48.0878	6.45755e-23	62.938	1
D3Z0R1;D3Z217;D6RIK3;D3YWK6;D3Z380;A0A0R4J018;O55060	58;34;54;34;34;34;34	D3Z0R1	D3Z0R1	Thiopurine S-methyltransferase	Tpmt		1	54.2806	0.000226593	54.281	43.426	54.281					1	54.2806	0.000226593	54.281	0	0		NaN	0	0		NaN													0	0		NaN	0	0		NaN	0
A0A0R4J1Y0;A0A0R4J024;Q924T3-2;Q924T3	230;230;230;230	A0A0R4J1Y0	A0A0R4J1Y0	DNA repair protein XRCC4	Xrcc4		0.641794	6.55682	5.72314e-07	46.66	42.302	46.66									0	0		NaN	0	0		NaN	0	0		NaN																	0
A0A0R4J034;Q99K01;Q99K01-2;Q99K01-4	718;718;718;724	A0A0R4J034	A0A0R4J034	Pyridoxal-dependent decarboxylase domain-containing protein 1	Pdxdc1		0.660652	3.42454	4.15144e-08	57.142	49.734	57.142	0.660652	3.42454	4.15144e-08	57.142					0	0		NaN	0	0		NaN	0	0		NaN									0	0		NaN	0	0		NaN	0
A0A0R4J034;Q99K01;Q99K01-2;Q99K01-4	736;736;736;742	A0A0R4J034	A0A0R4J034	Pyridoxal-dependent decarboxylase domain-containing protein 1	Pdxdc1		0.856682	7.81428	1.03016e-24	78.236	64.074	60.521	0.846634	7.44813	2.49357e-21	75.226	0.49802	0	1.11883e-07	54.259									0	0		NaN					0.856682	7.81428	2.24292e-11	60.521	0.853803	7.70292	1.03016e-24	78.236	0.498313	0	1.53823e-05	43.895	0
A0A0R4J034;Q99K01;Q99K01-2;Q99K01-4	737;737;737;743	A0A0R4J034	A0A0R4J034	Pyridoxal-dependent decarboxylase domain-containing protein 1	Pdxdc1		0.498313	0	1.11883e-07	54.259	46.547	43.895					0.49802	0	1.11883e-07	54.259									0	0		NaN													0.498313	0	1.53823e-05	43.895	0
A0A0R4J036;P08553	610;610	A0A0R4J036	A0A0R4J036	Neurofilament medium polypeptide	Nefm		1	76.8502	2.47746e-05	76.85	60.93	76.85	1	63.6807	7.96236e-05	63.681	0	0		NaN	0	0		NaN	1	43.3824	0.000189214	60.628	0	0		NaN	1	76.8502	2.47746e-05	76.85	0	0		NaN	1	60.6282	0.000189214	60.628	0	0		NaN	0
G3UYB5;G3UZP2;A0A0R4J041;Q8C3P7	48;48;48;48	G3UYB5	G3UYB5	N6-adenosine-methyltransferase subunit METTL3	Mettl3		0.513557	0.329176	2.36456e-11	49.847	45.038	49.847																																					0.513557
A0A0R4J060;J3QNK5;Q8BIH0-2;Q8BIH0	439;439;261;439	A0A0R4J060	A0A0R4J060	Histone deacetylase complex subunit SAP130	Sap130		0.999988	49.4027	0.0023844	51.445	37.288	51.211	0.999864	38.6672	0.00886759	40.475	0.999981	47.272	0.0023844	51.445	0	0		NaN									0.99993	41.5737	0.00490854	44.616	0.999948	42.8588	0.00444724	45.257	0	0		NaN					0.999988
A0A0R4J065;Q8BGE6	383;383	A0A0R4J065	A0A0R4J065	Cysteine protease ATG4B	Atg4b		1	79.5411	2.23724e-26	111.63	101.63	91.961	1	98.2897	5.32756e-26	109.24					0.999971	45.3638	0.00068324	51.841					0.999318	31.6622	0.00153485	47.603	1	79.5411	1.77803e-10	91.961	0	0		NaN	1	95.6894	2.23724e-26	111.63	0.999919	40.8948	0.00068324	51.841	0.999354
A0A0R4J083;P51174	54;54	A0A0R4J083	A0A0R4J083	Long-chain specific acyl-CoA dehydrogenase, mitochondrial	Acadl		0.992734	21.3555	2.43559e-12	130.94	108.2	103.22	0.824627	6.72295	1.11835e-06	91.937	0.975318	15.9677	1.31873e-10	94.688	0.988413	19.3095	1.22903e-09	116.77	0.992734	21.3555	1.89008e-08	103.22	0.843573	7.3181	6.04702e-07	94.616	0.750756	4.78873	4.96488e-05	81.017	0.992523	21.23	1.54888e-11	100.55	0.989832	19.8832	2.43559e-12	130.94	0.883489	8.79836	3.07948e-05	81.865	0.886286
A0A0R4J083;P51174	55;55	A0A0R4J083	A0A0R4J083	Long-chain specific acyl-CoA dehydrogenase, mitochondrial	Acadl		0.988413	19.3095	1.54888e-11	118.4	92.36	116.77	0.979258	16.7404	4.28472e-07	105.86	0.88434	8.83436	4.04045e-07	106.29	0.90494	9.78621	5.5276e-05	80.763	0.887825	8.9843	5.35709e-10	118.4	0.881299	8.70671	1.74278e-06	88.681	0.988413	19.3095	1.22903e-09	116.77	0.882951	8.77571	1.54888e-11	100.55	0.60673	1.88304	6.39937e-07	97.456	0.882951	8.77571	6.39937e-07	97.456	0.955556
A0A0R4J083;P51174	362;362	A0A0R4J083	A0A0R4J083	Long-chain specific acyl-CoA dehydrogenase, mitochondrial	Acadl		0.910086	12.0389	1.54149e-07	90.731	56.01	90.731	0	0		NaN					0	0		NaN	0.910086	12.0389	1.54149e-07	90.731					0.863908	8.65389	0.011065	47.288					0.333333	0	0.0273969	40.002	0	0		NaN
A0A0R4J083;P51174	364;364	A0A0R4J083	A0A0R4J083	Long-chain specific acyl-CoA dehydrogenase, mitochondrial	Acadl		0.333333	0	0.0273969	40.002	13.959	40.002	0	0		NaN					0	0		NaN																	0.333333	0	0.0273969	40.002	0	0		NaN
A0A0R4J083;P51174	366;366	A0A0R4J083	A0A0R4J083	Long-chain specific acyl-CoA dehydrogenase, mitochondrial	Acadl		0.333333	0	0.0273969	40.002	13.959	40.002	0	0		NaN					0	0		NaN																	0.333333	0	0.0273969	40.002	0	0		NaN
A0A0R4J083;P51174	191;191	A0A0R4J083	A0A0R4J083	Long-chain specific acyl-CoA dehydrogenase, mitochondrial	Acadl		0.608218	1.91032	1.01691e-05	83.182	71.227	57.106	0.555742	0.972388	0.00777761	62.408	0.5	0	1.01691e-05	83.182	0	0		NaN	0	0		NaN	0.608218	1.91032	0.00203077	57.106	0.5	0	2.65883e-05	77.597	0.5	0	0.000272925	67.456	0	0		NaN	0	0		NaN	0
A0A0R4J083;P51174	193;193	A0A0R4J083	A0A0R4J083	Long-chain specific acyl-CoA dehydrogenase, mitochondrial	Acadl		0.980227	16.9528	4.72923e-08	91.123	74.583	76.522	0.600318	1.76667	4.72923e-08	91.123	0.875935	8.48987	1.01691e-05	84.297	0	0		NaN	0.829698	6.87714	0.000721166	59.57	0.903152	9.712	0.00414412	46.159	0.980227	16.9528	1.36322e-07	77.597	0.798395	5.97779	0.000272925	67.456	0	0		NaN	0	0		NaN	0.838033
A0A0R4J0A4;P35969	1205;1205	A0A0R4J0A4	A0A0R4J0A4	Vascular endothelial growth factor receptor 1	Flt1		0.382432	0.928994	0.000164044	42.64	32.719	42.64	0.382432	0.928994	0.000164044	42.64					0	0		NaN	0	0		NaN									0	0		NaN	0	0		NaN	0	0		NaN	0
E9Q9N6;E9PYX3;A0A0R4J227;A0A0R4J0B1;Q3T9A3;F6ZS70;E9QMP6;Q05512-3;Q05512-4;Q05512-2;Q05512;F7A3Q3;F6ZEX4;F6UY70;F7CVZ7	495;495;495;495;462;486;495;495;495;493;495;111;75;37;32	E9Q9N6	E9Q9N6	Serine/threonine-protein kinase MARK2	Mark2		0.99999	50.2167	1.00313e-05	84.718	67.506	84.718	0.999709	35.3643	0.00127299	52.576	0	0		NaN	0.999975	46.0212	5.76642e-05	70.54	0.99986	38.5457	0.00062463	57.802	0	0		NaN	0	0		NaN	0.979092	16.7052	0.00580644	41.401	0.99999	50.2167	1.00313e-05	84.718					0.994235
E9Q9N6;E9PYX3;A0A0R4J227;A0A0R4J0B1;Q3T9A3;F6ZS70;E9QMP6;Q05512-3;Q05512-4;Q05512-2;Q05512;E9Q2J6;E9PZ55;E9Q2G8;E9Q8H5	40;40;40;40;7;31;40;40;40;40;40;7;7;40;40	E9Q9N6	E9Q9N6	Serine/threonine-protein kinase MARK2	Mark2		0.983872	20.864	2.77473e-07	73.405	62.812	73.405	0.6259	5.24551	8.90812e-06	53.059	0.333326	0	0.000169445	42.277	0.628711	4.91546	0.00013342	43.175	0.635366	5.42196	4.7295e-06	65.454	0.607554	4.90838	6.17782e-06	56.055					0.798933	9.00201	6.29519e-06	63.225	0.903676	12.7331	4.97965e-06	65.184	0.983872	20.864	2.77473e-07	73.405	0.333326
E9Q9N6;E9PYX3;A0A0R4J227;A0A0R4J0B1;Q3T9A3;F6ZS70;E9QMP6;Q05512-3;Q05512-4;Q05512-2;Q05512;E9Q2J6;E9PZ55;E9Q2G8;E9Q8H5	43;43;43;43;10;34;43;43;43;43;43;10;10;43;43	E9Q9N6	E9Q9N6	Serine/threonine-protein kinase MARK2	Mark2		0.333326	0	0.000167	42.338	34.929	42.277					0.333326	0	0.000169445	42.277																													0.333326
E9Q9N6;E9PYX3;A0A0R4J227;A0A0R4J0B1;Q3T9A3;F6ZS70;E9QMP6;Q05512-3;Q05512-4;Q05512-2;Q05512;E9Q2J6;A0A1Y7VNZ6;Q03141-2;Q03141-3;Q03141;A0A0A6YY78;Q8VHJ5;Q8CIP4-2;Q8CIP4	212;212;212;212;179;203;212;212;212;212;212;179;215;215;215;215;109;219;218;218	E9Q9N6;A0A1Y7VNZ6;Q8CIP4-2	E9Q9N6	Serine/threonine-protein kinase MARK2;MAP/microtubule affinity-regulating kinase 3;Serine/threonine-protein kinase MARK1;MAP/microtubule affinity-regulating kinase 4	Mark2;Mark3;Mark1;Mark4		0.525945	0.459976	1.10068e-05	45.413	42.594	45.413	0.498303	0	1.59807e-05	45.395																	0.525945	0.459976	1.10068e-05	45.413
E9Q9N6;E9PYX3;A0A0R4J227;A0A0R4J0B1;Q3T9A3;F6ZS70;E9QMP6;Q05512-3;Q05512-4;Q05512-2;Q05512	380;380;380;380;347;371;380;380;380;378;380	E9Q9N6	E9Q9N6	Serine/threonine-protein kinase MARK2	Mark2		0.245188	0	3.44651e-12	54.66	48.365	40.094	0	0		NaN	0.245188	0	1.51457e-05	40.094					0	0		NaN					0	0		NaN					0.226555	0	3.44651e-12	54.66					0
E9Q9N6;E9PYX3;A0A0R4J227;A0A0R4J0B1;Q3T9A3;F6ZS70;E9QMP6;Q05512-3;Q05512-4;Q05512-2;Q05512	387;387;387;387;354;378;387;387;387;385;387	E9Q9N6	E9Q9N6	Serine/threonine-protein kinase MARK2	Mark2		0.568874	3.34808	1.49161e-19	97.813	82.67	97.813	0	0		NaN	0	0		NaN	0.253406	0.699124	6.87814e-09	50.144	0	0		NaN	0.568874	3.34808	1.49161e-19	97.813	0	0		NaN					0	0		NaN					0
E9Q9N6;E9PYX3;A0A0R4J227;A0A0R4J0B1;Q3T9A3;F6ZS70;E9QMP6;Q05512-3;Q05512-4;Q05512-2;Q05512	390;390;390;390;357;381;390;390;390;388;390	E9Q9N6	E9Q9N6	Serine/threonine-protein kinase MARK2	Mark2		0.947783	14.2842	2.96971e-59	144.1	132.66	144.1	0.637204	7.94825	0.0011547	40.278	0.571312	5.40431	9.30968e-05	65.805	0.859362	12.1035	1.99273e-10	83.045	0.87518	8.81724	2.13634e-10	82.651					0.70073	7.62662	1.78381e-06	75.695					0.547044	5.1251	5.42096e-06	74.841	0.80026	10.9962	9.74399e-11	85.837	0.947783
E9Q9N6;E9PYX3;A0A0R4J227;A0A0R4J0B1;Q3T9A3;F6ZS70;E9QMP6;Q05512-3;Q05512-4;Q05512-2;Q05512;F7A3Q3	408;408;408;408;375;399;408;408;408;406;408;24	E9Q9N6	E9Q9N6	Serine/threonine-protein kinase MARK2	Mark2		0.572071	1.26079	8.64328e-25	95.57	76.824	72.819	0.5	0	2.52807e-09	79.81	0.5	0	2.16516e-13	82.349	0.499999	0	2.84612e-05	60.918	0.550889	0.888089	2.08476e-05	66.022	0.5	0	7.43503e-06	68.944	0.499993	0	1.9916e-05	55.755	0.5	0	8.64328e-25	95.57	0.563379	1.10705	2.48018e-06	57.499	0.499999	0	2.74141e-06	60.464	0.499953
E9Q9N6;E9PYX3;A0A0R4J227;A0A0R4J0B1;Q3T9A3;F6ZS70;E9QMP6;Q05512-3;Q05512-4;Q05512-2;Q05512;F7A3Q3	409;409;409;409;376;400;409;409;409;407;409;25	E9Q9N6	E9Q9N6	Serine/threonine-protein kinase MARK2	Mark2		0.832322	6.95817	8.64328e-25	95.57	76.824	73.11	0.782966	5.57236	2.52807e-09	79.81	0.5	0	2.16516e-13	82.349	0.791746	5.80014	2.42328e-06	60.918	0.499999	0	2.08476e-05	66.022	0.832322	6.95817	1.49764e-07	73.11	0.499993	0	1.9916e-05	55.755	0.5	0	8.64328e-25	95.57	0.499997	0	2.43875e-05	57.499	0.499999	0	2.74141e-06	60.464	0.544005
E9Q9N6;E9PYX3;A0A0R4J227;A0A0R4J0B1;Q3T9A3;F6ZS70;E9QMP6;Q05512-3;Q05512-4;Q05512-2;Q05512;F7A3Q3	419;419;419;419;386;410;419;419;419;417;419;35	E9Q9N6	E9Q9N6	Serine/threonine-protein kinase MARK2	Mark2		0.24593	0	0.000211595	61.444	45.904	42.031																					0.24593	0	0.00423156	42.031					0.223109	0	0.000211595	61.444
E9Q9N6;E9PYX3;A0A0R4J227;A0A0R4J0B1;Q3T9A3;F6ZS70;E9QMP6;Q05512-3;Q05512-4;Q05512-2;Q05512;F7A3Q3	421;421;421;421;388;412;421;421;421;419;421;37	E9Q9N6	E9Q9N6	Serine/threonine-protein kinase MARK2	Mark2		0.24593	0	0.000211595	61.444	45.904	42.031																					0.24593	0	0.00423156	42.031					0.223109	0	0.000211595	61.444
E9Q9N6;E9PYX3;A0A0R4J227;A0A0R4J0B1;Q3T9A3;F6ZS70;E9QMP6;Q05512-3;Q05512-4;Q05512-2;Q05512;F7A3Q3	423;423;423;423;390;414;423;423;423;421;423;39	E9Q9N6	E9Q9N6	Serine/threonine-protein kinase MARK2	Mark2		0.223109	0	0.000211595	61.444	45.904	61.444																													0.223109	0	0.000211595	61.444
E9Q9N6;E9PYX3;A0A0R4J227;A0A0R4J0B1;Q3T9A3;F6ZS70;E9QMP6;Q05512-3;Q05512-4;Q05512-2;Q05512;F7A3Q3;F6ZEX4;F6UY70;F7CVZ7	483;483;483;483;450;474;483;483;483;481;483;99;63;25;20	E9Q9N6	E9Q9N6	Serine/threonine-protein kinase MARK2	Mark2		0.99531	23.2676	0.00209315	51.841	29.755	47.559	0.99531	23.2676	0.00335251	48.659	0.790052	5.75543	0.00804209	41.401	0.850246	7.54166	0.00209315	51.841	0	0		NaN	0	0		NaN	0.795821	5.90805	0.00265329	50.207	0	0		NaN	0.795821	5.90805	0.00265329	50.207	0.828884	6.85203	0.00716144	42.446
E9Q9N6;E9PYX3;A0A0R4J227;A0A0R4J0B1;Q3T9A3;F6ZS70;E9QMP6;Q05512-3;Q05512-4;Q05512-2;Q05512	365;365;365;365;332;356;365;365;365;363;365	E9Q9N6	E9Q9N6	Serine/threonine-protein kinase MARK2	Mark2		0.499999	0	0.00011709	73.927	61.951	73.927	0.499993	0	0.000208322	70.977	0.499943	0	0.000395017	51.888	0.499981	0	0.00340822	54.524	0.499999	0	0.00011709	73.927	0	0		NaN	0.499858	0	0.000402583	51.695	0.499759	0	0.00137796	44.005	0.499986	0	0.000441253	68.034	0.499993	0	0.000208322	70.977	0.499968
E9Q9N6;E9PYX3;A0A0R4J227;A0A0R4J0B1;Q3T9A3;F6ZS70;E9QMP6;Q05512-3;Q05512-4;Q05512-2;Q05512	366;366;366;366;333;357;366;366;366;364;366	E9Q9N6	E9Q9N6	Serine/threonine-protein kinase MARK2	Mark2		0.499999	0	0.00011709	73.927	61.951	73.927	0.499993	0	0.000208322	70.977	0.499943	0	0.000395017	51.888	0.499981	0	0.00340822	54.524	0.499999	0	0.00011709	73.927	0	0		NaN	0.499858	0	0.000402583	51.695	0.499759	0	0.00137796	44.005	0.499986	0	0.000441253	68.034	0.499993	0	0.000208322	70.977	0.499968
E9Q9N6;E9PYX3;A0A0R4J227;A0A0R4J0B1;Q3T9A3;F6ZS70;E9QMP6;Q05512-3;Q05512-4;Q05512-2;Q05512;F7A3Q3;F6ZEX4;F6UY70	474;474;474;474;441;465;474;474;474;472;474;90;54;16	E9Q9N6	E9Q9N6	Serine/threonine-protein kinase MARK2	Mark2		0.247194	0	0.000156898	47.545	28.716	47.545	0	0		NaN					0.247194	0	0.000156898	47.545					0	0		NaN	0	0		NaN	0	0		NaN									0
E9Q9N6;E9PYX3;A0A0R4J227;A0A0R4J0B1;Q3T9A3;F6ZS70;E9QMP6;Q05512-3;Q05512-4;Q05512-2;Q05512;F7A3Q3;F6ZEX4;F6UY70	476;476;476;476;443;467;476;476;476;474;476;92;56;18	E9Q9N6	E9Q9N6	Serine/threonine-protein kinase MARK2	Mark2		0.247194	0	0.000156898	47.545	28.716	47.545	0	0		NaN					0.247194	0	0.000156898	47.545					0	0		NaN	0	0		NaN	0	0		NaN									0
E9Q9N6;E9PYX3;A0A0R4J227;A0A0R4J0B1;Q3T9A3;F6ZS70;E9QMP6;Q05512-3;Q05512-4;Q05512-2;Q05512;F7A3Q3;F6ZEX4;F6Z4Q6	453;453;453;453;420;444;453;453;453;451;453;69;33;10	E9Q9N6	E9Q9N6	Serine/threonine-protein kinase MARK2	Mark2		1	67.1532	2.31525e-05	78.692	61.325	67.153	1	59.5697	0.000721166	59.57	1	67.1532	0.000289029	67.153	1	67.1532	0.000289029	67.153	1	57.0193	0.000957187	57.019	1	57.8361	0.000825719	57.836	1	69.7206	0.000152691	69.721	1	78.692	2.31525e-05	78.692	1	63.4082	0.000489666	63.408	1	54.4709	0.00160969	54.471	1
E9Q9N6;E9PYX3;A0A0R4J227;A0A0R4J0B1;Q3T9A3;F6ZS70;E9QMP6;Q05512-3;Q05512-4;Q05512-2;Q05512;F7A3Q3;F6ZEX4;F6UY70;F7CVZ7;F7CRG8	512;512;512;512;533;557;566;512;512;564;566;128;146;54;103;59	E9Q9N6	E9Q9N6	Serine/threonine-protein kinase MARK2	Mark2		0.492754	0	2.23403e-07	53.964	46.342	53.964													0	0		NaN	0	0		NaN	0.492754	0	2.23403e-07	53.964	0	0		NaN					0	0		NaN
E9Q9N6;E9PYX3;A0A0R4J227;A0A0R4J0B1;Q3T9A3;F6ZS70;E9QMP6;Q05512-3;Q05512-4;Q05512-2;Q05512;F7A3Q3;F6ZEX4;F6UY70;F7CVZ7;F7CRG8	514;514;514;514;535;559;568;514;514;566;568;130;148;56;105;61	E9Q9N6	E9Q9N6	Serine/threonine-protein kinase MARK2	Mark2		0.833784	7.08942	1.77934e-33	97.974	78.938	97.974	0.637496	5.41141	2.37184e-08	57.238					0.833784	7.08942	1.77934e-33	97.974	0	0		NaN	0	0		NaN	0.492754	0	2.23403e-07	53.964	0	0		NaN	0.510247	5.36757	3.53864e-09	67.979	0	0		NaN
A0A0R4J0B3;Q6PB82;O70405	450;450;450	A0A0R4J0B3	A0A0R4J0B3	Serine/threonine-protein kinase ULK1	Ulk1		0.971344	15.3154	3.75095e-26	102.28	80.045	97.417	0.895723	9.34225	3.75095e-26	102.28	0.830901	6.93233	4.50413e-10	83.692	0.971344	15.3154	4.31255e-19	97.417	0.796223	5.92349	2.59474e-10	85.734	0.84812	7.50025	3.91785e-05	72.175	0.843453	7.3418	3.04534e-07	77.062	0.896608	9.39221	0.000121857	68.069	0.820543	6.61298	1.19631e-07	80.245					0.905743
A0A0R4J0B3;Q6PB82;O70405	555;561;555	A0A0R4J0B3	A0A0R4J0B3	Serine/threonine-protein kinase ULK1	Ulk1		0.999888	39.5065	4.32774e-06	73.809	60.867	73.809	0.997383	25.8107	5.55389e-05	62.203	0.999681	34.9545	5.47472e-05	61.102	0.999669	34.804	7.04987e-06	72.359	0.996906	25.0807	5.47472e-05	61.102	0.99923	31.1324	5.30271e-05	58.712	0.995674	23.6203	5.514e-05	61.648	0.999888	39.5065	4.32774e-06	73.809	0.98694	18.7835	7.21891e-05	54.805	0.992877	21.4421	5.32323e-05	58.997	0.999479
A0A0R4J0B3;Q6PB82;O70405	777;783;777	A0A0R4J0B3	A0A0R4J0B3	Serine/threonine-protein kinase ULK1	Ulk1		0.450409	0	1.21851e-24	92.977	66.007	73.466	0	0		NaN					0.450409	0	1.45677e-09	73.466	0.44204	0	1.21851e-24	92.977	0	0		NaN					0	0		NaN	0	0		NaN	0	0		NaN	0
A0A0R4J0B3;Q6PB82;O70405	778;784;778	A0A0R4J0B3	A0A0R4J0B3	Serine/threonine-protein kinase ULK1	Ulk1		0.450409	0	1.21851e-24	92.977	66.007	73.466	0	0		NaN					0.450409	0	1.45677e-09	73.466	0.44204	0	1.21851e-24	92.977	0	0		NaN					0	0		NaN	0	0		NaN	0	0		NaN	0
A0A0R4J0B3;Q6PB82	467;467	A0A0R4J0B3	A0A0R4J0B3		Ulk1		0.542968	0.755655	0.00554578	44.299	31.262	44.299									0.542968	0.755655	0.00554578	44.299					0	0		NaN	0	0		NaN					0	0		NaN	0	0		NaN	0
A0A0R4J0B3;Q6PB82	469;469	A0A0R4J0B3	A0A0R4J0B3		Ulk1		0.806541	6.61855	0.00554578	44.299	31.262	44.299									0.806541	6.61855	0.00554578	44.299					0	0		NaN	0	0		NaN					0	0		NaN	0	0		NaN	0
A0A0R4J0B3;Q6PB82;O70405	622;628;622	A0A0R4J0B3	A0A0R4J0B3	Serine/threonine-protein kinase ULK1	Ulk1		0.911246	10.1146	4.50827e-12	95.018	63.646	77.677	0.903819	9.72993	4.50827e-12	95.018	0.895775	9.34227	2.63872e-05	81.431	0.879683	8.64018	0.000346843	62.088	0.911246	10.1146	6.98047e-05	77.677	0.898411	9.4663	1.37281e-05	83.314	0.658174	2.84535	6.23273e-05	78.324	0.856559	7.76087	0.000186572	65.563	0.862174	7.96266	7.93263e-05	74.46	0.863614	8.01552	6.67533e-05	69.451	0.89191
A0A0R4J0B3;Q6PB82;O70405	637;643;637	A0A0R4J0B3	A0A0R4J0B3	Serine/threonine-protein kinase ULK1	Ulk1		0.894912	9.60052	6.38867e-11	79.633	65.187	63.283	0.757331	7.67413	0.00406025	42.395	0.496999	0	6.38867e-11	79.633					0.551211	3.62175	0.00169764	48.981													0.894912	9.60052	0.000131491	63.283	0.778667	6.36548	0.0239862	45.79	0.837798
A0A0R4J0B3;Q6PB82;O70405	638;644;638	A0A0R4J0B3	A0A0R4J0B3	Serine/threonine-protein kinase ULK1	Ulk1		0.496999	0	6.38867e-11	79.633	65.187	79.633					0.496999	0	6.38867e-11	79.633
A0A0R4J0B3;Q6PB82;O70405	521;527;521	A0A0R4J0B3	A0A0R4J0B3	Serine/threonine-protein kinase ULK1	Ulk1		1	64.4386	0.00101918	64.439	47.053	64.439	1	55.5494	0.00157997	55.549	1	64.4386	0.00106562	64.439	1	48.7942	0.0040148	48.794	1	57.9598	0.00101918	57.96					1	44.5427	0.00627052	44.543					1	61.3438	0.00109787	61.344	1	61.3438	0.00109787	61.344	1
A0A0R4J0D3;Q3TDQ1	495;495	A0A0R4J0D3	A0A0R4J0D3	Dolichyl-diphosphooligosaccharide--protein glycosyltransferase subunit STT3B	Stt3b		0.999241	31.1883	6.5917e-38	90.974	64.817	56.914	0.499713	0	3.91315e-07	52.391	0.49996	0	3.91315e-07	52.391	0.49996	0	7.7487e-06	49.793	0.999241	31.1883	6.5917e-38	90.974	0.499996	0	5.93437e-11	59.893	0.49887	0	3.85039e-05	41.188	0.49971	0	3.32012e-05	44.301					0.499751	0	3.26996e-05	44.596	0.499998
A0A0R4J0D3;Q3TDQ1	496;496	A0A0R4J0D3	A0A0R4J0D3	Dolichyl-diphosphooligosaccharide--protein glycosyltransferase subunit STT3B	Stt3b		0.999241	31.1883	6.5917e-38	90.974	64.817	56.914	0.499713	0	3.91315e-07	52.391	0.49996	0	3.91315e-07	52.391	0.49996	0	7.7487e-06	49.793	0.999241	31.1883	6.5917e-38	90.974	0.499996	0	5.93437e-11	59.893	0.49887	0	3.85039e-05	41.188	0.49971	0	3.32012e-05	44.301					0.499751	0	3.26996e-05	44.596	0.499998
A0A0R4J2D4;A0A0R4J0D5;Q6PDG8-2;Q6PDG8	31;31;31;31	A0A0R4J2D4	A0A0R4J2D4	Vacuolar fusion protein MON1 homolog A	Mon1a		0.990896	20.3959	1.78243e-57	94.75	77.774	87.749									0.941965	12.1098	1.11822e-39	85.337	0.84139	7.25369	1.09147e-39	85.412	0.971027	15.256	7.70128e-40	86.324									0.973945	15.7292	1.78243e-57	94.75	0.95931	13.8337	7.54853e-20	63.776
A0A0R4J2D4;A0A0R4J0D5;Q6PDG8-2;Q6PDG8	308;308;308;308	A0A0R4J2D4	A0A0R4J2D4	Vacuolar fusion protein MON1 homolog A	Mon1a		1	42.7433	0.0153333	42.743	30.828	42.743	1	42.7433	0.0153333	42.743					0	0		NaN	0	0		NaN	0	0		NaN					1	42.7433	0.0153333	42.743	0	0		NaN	0	0		NaN
A0A0R4J2D4;A0A0R4J0D5;Q6PDG8-2;Q6PDG8	310;310;310;310	A0A0R4J2D4	A0A0R4J2D4	Vacuolar fusion protein MON1 homolog A	Mon1a		1	42.7433	0.0153333	42.743	30.828	42.743	1	42.7433	0.0153333	42.743					0	0		NaN	0	0		NaN	0	0		NaN					1	42.7433	0.0153333	42.743	0	0		NaN	0	0		NaN
A0A0R4J2D4;A0A0R4J0D5;Q6PDG8-2;Q6PDG8	56;56;56;56	A0A0R4J2D4	A0A0R4J2D4	Vacuolar fusion protein MON1 homolog A	Mon1a		0.928667	11.1458	2.24945e-08	93.011	72.584	93.011	0	0		NaN																	0	0		NaN	0.928667	11.1458	2.24945e-08	93.011
A0A0R4J0G4;Q6VN19	389;361	A0A0R4J0G4	A0A0R4J0G4	Ran-binding protein 10	Ranbp10		0.878025	9.97712	0.000280327	58.32	43.348	55.841	0.746799	6.82089	0.0033938	40.025	0	0		NaN	0.878025	9.97712	0.000439029	55.841	0	0		NaN	0	0		NaN	0	0		NaN	0	0		NaN	0.860705	11.5904	0.000280327	58.32	0.854853	11.3975	0.0475452	40.941	0
A0A0R4J0G4;Q6VN19	393;365	A0A0R4J0G4	A0A0R4J0G4	Ran-binding protein 10	Ranbp10		0.880142	9.43257	9.30536e-06	75.669	61.462	55.841	0.731062	5.53085	4.5428e-05	69.258	0.814735	7.62714	0.000505251	54.471	0.880142	9.43257	0.000439029	55.841	0.831535	7.70531	9.30536e-06	75.669	0	0		NaN	0	0		NaN	0	0		NaN	0	0		NaN	0	0		NaN	0.854489
A0A0R4J0H8;Q6NWW9	208;208	A0A0R4J0H8	A0A0R4J0H8	Fibronectin type III domain-containing protein 3B	Fndc3b		0.999096	33.6008	0.000637207	68.355	42.313	68.355	0	0		NaN	0.98639	21.8862	0.0110116	40.154	0	0		NaN	0.996499	27.6847	0.0019069	54.471	0	0		NaN	0	0		NaN	0	0		NaN	0.998609	31.7877	0.00082971	66.595	0.982643	20.6219	0.00165125	55.314	0.999096
A0A0R4J0I0;P70459	534;534	A0A0R4J0I0	A0A0R4J0I0	ETS domain-containing transcription factor ERF	Erf		0.498729	0	1.99289e-06	65.833	57.443	65.833													0	0		NaN													0.498729	0	1.99289e-06	65.833	0	0		NaN	0
A0A0R4J0I0;P70459	535;535	A0A0R4J0I0	A0A0R4J0I0	ETS domain-containing transcription factor ERF	Erf		0.498729	0	1.99289e-06	65.833	57.443	65.833													0	0		NaN													0.498729	0	1.99289e-06	65.833	0	0		NaN	0
A0A0R4J0J0;Q9JHU2;Q3UVT7	278;278;278	A0A0R4J0J0	A0A0R4J0J0	Palmdelphin	Palmd		1	80.9793	1.20485e-14	116.54	116.54	80.979	1	89.4035	6.98815e-08	89.403	1	80.9793	1.59761e-05	80.979	1	97.9113	4.45831e-11	97.911	1	84.2893	8.07188e-06	84.289	1	91.9373	3.65966e-08	91.937	1	107.847	9.28649e-12	107.85	1	85.845	5.12485e-06	85.845	1	105.17	2.50545e-11	105.17	1	116.539	1.20485e-14	116.54	1
A0A0R4J0J0;Q9JHU2	520;520	A0A0R4J0J0	A0A0R4J0J0	Palmdelphin	Palmd		1	78.5346	6.64617e-139	156.92	144.6	91.354	1	78.5346	3.44792e-106	138.25	1	74.1236	6.091e-48	90.303	1	119.99	6.64617e-139	156.92	1	81.7357	1.00982e-73	114.72	0.999999	61.7858	1.20159e-23	82.639	1	86.109	1.91768e-62	112.86	0.999999	58.9899	2.32167e-61	107.33	1	76.7573	1.46856e-51	106.49	0.999993	51.3652	7.99569e-19	80.711	1
A0A0R4J0J0;Q9JHU2	515;515	A0A0R4J0J0	A0A0R4J0J0	Palmdelphin	Palmd		1	83.6554	4.80874e-49	94.261	81.332	91.354	1	83.6554	4.64176e-48	91.354	1	75.3527	6.091e-48	90.303	0.999927	45.4502	4.34776e-28	71.149	0.999979	48.5946	2.43189e-28	73.322	0.999953	46.4859	3.69761e-34	80.847	0.999931	45.5668	6.13236e-40	85.185	0.999999	61.4111	4.80874e-49	94.261	0.499936	0	7.88894e-40	82.878	0.999398	32.2482	6.89438e-28	70.145	0.99733
A0A0R4J0J0;Q9JHU2;Q3UVT7	349;349;349	A0A0R4J0J0	A0A0R4J0J0	Palmdelphin	Palmd		1	77.1869	8.4036e-12	108.37	103.76	108.37	1	77.1869	8.4036e-12	108.37	0.999984	50.9266	0.000272925	67.456	0.999988	50.1716	7.21578e-05	73.848	0.999999	64.5103	6.89065e-07	88.187	0.999998	57.0011	6.89065e-07	88.187	0.999995	54.3672	2.65999e-05	77.593	1	66.3248	4.18766e-11	97.214	0.999997	56.1651	1.81019e-08	93.345	0.999997	58.7531	3.83813e-05	75.695	0.999993
A0A0R4J0J0;Q9JHU2;Q3UVT7	370;370;370	A0A0R4J0J0	A0A0R4J0J0	Palmdelphin	Palmd		0.997755	24.6471	5.40833e-05	82.069	69.257	67.456	0.991502	18.5896	0.00193233	58.32	0.972743	13.913	0.0030118	55.314	0.99557	22.673	0.000656917	64.121	0.994729	20.4267	5.40833e-05	82.069	0.97958	14.9629	0.00263749	56.205	0.993602	20.7423	0.00334335	54.524	0.997186	23.0608	0.000191379	77.894	0.995897	22.0905	0.000656917	64.121	0.99503	21.841	0.000656917	64.65	0.997755
A0A0R4J0J0;Q9JHU2;Q3UVT7	372;372;372	A0A0R4J0J0	A0A0R4J0J0	Palmdelphin	Palmd		0.840158	7.30234	9.99204e-08	92.856	66.739	92.856	0.487715	0	0.0463627	59.57	0.499798	0	0.000116787	79.492	0.824208	6.68697	2.10491e-07	90.793	0.499237	0	6.81557e-05	84.718	0.66066	2.75708	0.000352662	70.089	0.494021	0	8.78462e-05	83.617	0.62131	1.94605	0.000324063	70.089	0.668066	3.01092	0.000352662	78.324	0.65549	2.69851	9.04177e-06	88.021	0.656909
A0A0R4J0J0;Q9JHU2;Q3UVT7	375;375;375	A0A0R4J0J0	A0A0R4J0J0	Palmdelphin	Palmd		0.925409	10.8931	2.10491e-07	90.793	75.47	82.069	0.622641	2.11515	0.00193233	59.57	0.698346	3.47271	0.000116787	79.492	0.600017	1.72667	2.10491e-07	90.793	0.925409	10.8931	5.40833e-05	84.718	0.498558	0	0.000352662	70.089	0.76549	5.10132	8.78462e-05	83.617	0.894676	9.2188	0.000191379	77.894	0.764752	5.08925	0.000352662	78.324	0.764301	5.08072	9.04177e-06	88.021	0.685926
A0A0R4J0J0;Q9JHU2;Q3UVT7	250;250;250	A0A0R4J0J0	A0A0R4J0J0	Palmdelphin	Palmd		0.569002	1.778	9.13131e-12	60.176	46.631	60.176	0.469278	0	0.000103352	42.582	0.360221	0.600575	4.49689e-05	43.799									0.522686	1.23204	2.67506e-05	44.729	0.569002	1.778	9.13131e-12	60.176													0.483374
A0A0R4J0J0;Q9JHU2;Q3UVT7	252;252;252	A0A0R4J0J0	A0A0R4J0J0	Palmdelphin	Palmd		0.971303	15.2956	2.46861e-48	98.236	82.313	91.767	0.760389	5.27839	2.99344e-18	69.492	0.943137	12.959	2.06056e-17	67.283	0.950266	12.8128	2.39349e-21	77.19	0.902215	9.65099	1.62619e-23	84.107	0.96361	14.9507	4.75162e-48	95.741	0.49843	1.8531	2.08906e-07	52.345	0.947507	13.7431	4.44027e-21	71.881	0.971303	15.2956	2.46861e-48	98.236	0.825465	7.30233	2.88952e-31	86.324	0.852731
A0A0R4J0J0;Q9JHU2;Q3UVT7	321;321;321	A0A0R4J0J0	A0A0R4J0J0	Palmdelphin	Palmd		0.965894	14.646	7.92188e-43	109.85	99.476	109.85	0.785785	5.7367	4.43985e-33	103.17	0.410209	0	0.000632217	51.348	0.322855	0	0.00463711	43.791	0.965894	14.646	7.92188e-43	109.85	0	0		NaN	0.815808	7.01078	4.00366e-05	50.079	0.426798	0	0.0024864	46.027	0.441662	0	0.000228702	43.297	0	0		NaN	0
A0A0R4J0J0;Q9JHU2;Q3UVT7	384;384;384	A0A0R4J0J0	A0A0R4J0J0	Palmdelphin	Palmd		0.449882	0	3.65879e-06	55.589	40.108	40.725	0	0		NaN									0	0		NaN	0	0		NaN	0	0		NaN	0.329121	0	4.31567e-06	54.288	0	0		NaN					0.327964
A0A0R4J0J0;Q9JHU2;Q3UVT7	385;385;385	A0A0R4J0J0	A0A0R4J0J0	Palmdelphin	Palmd		0.449882	0	3.65879e-06	55.589	40.108	40.725	0	0		NaN									0	0		NaN	0	0		NaN	0	0		NaN	0.329121	0	4.31567e-06	54.288	0	0		NaN					0.327964
A0A0R4J0J4;Q9QUI6	315;315	A0A0R4J0J4	A0A0R4J0J4	Atypical chemokine receptor 1	Ackr1		0.995846	25.6619	6.23188e-07	97.214	72.871	95.477	0.995846	25.6619	6.38458e-07	95.477	0.992169	22.582	0.000183528	75.819	0.972637	15.6611	6.63479e-07	96.64	0	0		NaN	0.975593	16.2845	0.000107808	78.692	0.995453	25.0467	6.23188e-07	94.767	0	0		NaN	0.963482	14.5961	0.0031809	51.013	0.971747	15.5344	2.96065e-06	88.187	0.968379
A0A0R4J0J4;Q9QUI6	318;318	A0A0R4J0J4	A0A0R4J0J4	Atypical chemokine receptor 1	Ackr1		0.999148	32.0349	6.23188e-07	97.214	72.871	97.214	0.997175	25.6619	6.38458e-07	95.477	0.981942	17.6473	0.000183528	75.819	0.998419	28.1999	6.63479e-07	96.64	0	0		NaN	0.987052	19.1223	0.000107808	78.692	0.987375	18.9478	6.23188e-07	94.767	0	0		NaN	0.923077	12.2305	0.0031809	51.013	0.99823	29.5125	2.96065e-06	88.187	0.971407
A0A0R4J0J8;Q2KN98	905;888	A0A0R4J0J8	A0A0R4J0J8	Cytospin-A	Specc1l		0.999914	40.675	9.08546e-12	107.97	82.728	91.961	0.999277	31.4152	5.39851e-08	90.614	0.998843	33.4919	0.00593373	43.544	0.961162	14.1622	8.3029e-06	48.883	0.9984	27.952	9.08546e-12	107.97	0.999797	37.0181	3.8758e-08	73.435	0.943068	12.9338	0.000349062	66.023	0.993149	22.2218	4.91214e-07	51.348	0.999734	35.8904	1.88938e-05	67.879	0.99857	28.9067	0.00278296	50.207	0.999914
A0A0R4J0J8;Q2KN98	402;385	A0A0R4J0J8	A0A0R4J0J8	Cytospin-A	Specc1l		0.450224	0	4.01561e-06	53.773	42.512	53.773	0	0		NaN					0.450224	0	4.01561e-06	53.773	0	0		NaN	0.329467	0	2.10781e-05	47.09	0	0		NaN	0	0		NaN					0	0		NaN	0
A0A0R4J0J8;Q2KN98	403;386	A0A0R4J0J8	A0A0R4J0J8	Cytospin-A	Specc1l		0.450224	0	4.01561e-06	53.773	42.512	53.773	0	0		NaN					0.450224	0	4.01561e-06	53.773	0	0		NaN	0.329467	0	2.10781e-05	47.09	0	0		NaN	0	0		NaN					0	0		NaN	0
A0A0R4J0J8;Q2KN98	407;390	A0A0R4J0J8	A0A0R4J0J8	Cytospin-A	Specc1l		0.329467	0	2.10781e-05	47.09	39.889	47.09	0	0		NaN									0	0		NaN	0.329467	0	2.10781e-05	47.09	0	0		NaN	0	0		NaN					0	0		NaN	0
A0A0R4J0J8;Q2KN98	850;833	A0A0R4J0J8	A0A0R4J0J8	Cytospin-A	Specc1l		0.594852	7.69894	0.000113592	67.997	45.379	64.65	0.583618	4.61692	0.000158243	67.997									0.594852	7.69894	0.000291422	64.65					0.54896	5.60115	0.000113592	57.973					0.57809	7.39897	0.00185809	55.314	0	0		NaN
A0A0R4J0J8;Q2KN98	852;835	A0A0R4J0J8	A0A0R4J0J8	Cytospin-A	Specc1l		0.267808	0	5.92955e-05	82.362	63.091	82.362													0	0		NaN					0.267808	0	5.92955e-05	82.362									0	0		NaN
A0A0R4J0J8;Q2KN98	853;836	A0A0R4J0J8	A0A0R4J0J8	Cytospin-A	Specc1l		0.267808	0	5.92955e-05	82.362	63.091	82.362													0	0		NaN					0.267808	0	5.92955e-05	82.362									0	0		NaN
A0A0R4J0J8;Q2KN98	939;922	A0A0R4J0J8	A0A0R4J0J8	Cytospin-A	Specc1l		0.313861	0	0.0190864	46.158	22.003	46.158	0.313861	0	0.0190864	46.158	0.308934	0	0.0193966	45.997	0	0		NaN	0	0		NaN	0	0		NaN	0	0		NaN	0	0		NaN									0
A0A0R4J0J8;Q2KN98	940;923	A0A0R4J0J8	A0A0R4J0J8	Cytospin-A	Specc1l		0.871845	8.92971	4.06677e-05	75.462	59.643	75.462	0.779526	6.16431	4.06677e-05	69.345	0.751456	5.7559	0.000679591	53.377	0.717019	5.26582	0.000679591	53.377	0	0		NaN	0.843091	8.49569	0.00014155	63.709	0.784103	6.67763	9.54387e-05	66.285	0.84663	8.49429	0.000362728	57.804	0.697011	8.73814	0.0163174	48.004	0.813883	7.95951	0.00157401	46.964	0
A0A0R4J0M9;Q8CDG3;Q8CDG3-2	767;767;767	A0A0R4J0M9	A0A0R4J0M9	Deubiquitinating protein VCIP135	Vcpip1		0.980951	17.8961	0.000398112	83.397	47.063	83.397	0	0		NaN					0	0		NaN	0.796322	7.09027	0.00200318	64.439	0	0		NaN	0.673779	6.96457	0.0052732	49.3	0.941286	16.83	0.00204873	58.37	0.980951	17.8961	0.000398112	83.397	0.949024	14.8178	0.0026297	55.314
A0A0R4J0M9;Q8CDG3	996;996	A0A0R4J0M9	A0A0R4J0M9	Deubiquitinating protein VCIP135	Vcpip1		0.464432	0	0.0162261	42.109	16.372	42.109					0.464432	0	0.0162261	42.109																									0	0		NaN	0
A0A0R4J0M9;Q8CDG3	997;997	A0A0R4J0M9	A0A0R4J0M9	Deubiquitinating protein VCIP135	Vcpip1		0.893793	9.98302	0.00108034	60.59	41.859	60.59	0.893793	9.98302	0.00108034	60.59	0.464432	0	0.0162261	42.109					0.823043	7.79236	0.00647956	44.349	0.538298	1.69884	0.00706438	43.808													0	0		NaN	0.756265
A0A0R4J0M9;Q8CDG3;Q8CDG3-2	746;746;746	A0A0R4J0M9	A0A0R4J0M9	Deubiquitinating protein VCIP135	Vcpip1		0.999914	41.3561	0.000681022	105.4	47.437	105.4	0.999757	37.1674	0.0018297	91.584	0.999241	32.064	0.00135515	88.495	0.999607	35.1523	0.0018297	91.584	0.999914	41.3561	0.00145606	105.4	0.999842	39.3542	0.00206644	93.111	0.996905	27.2	0.00260437	82.749	0.999755	36.9347	0.000681022	101.65	0.99955	34.6059	0.00299222	79.974	0.99939	35.4518	0.00454975	72.643	0.999689
A0A0R4J0P6;Q8VDG3	556;556	A0A0R4J0P6	A0A0R4J0P6	Poly(A)-specific ribonuclease PARN	Parn		0.973166	15.5949	0.00794884	82.287	14.063	82.287																					0.5	0	0.0314866	78.334
A0A0R4J0Q5;P21619-2;P21619	416;275;397	A0A0R4J0Q5	A0A0R4J0Q5	Lamin-B2	Lmnb2		0.193881	0	7.50257e-15	61.375	53.464	61.375	0.193881	0	6.4873e-07	61.375					0.124837	0	0.00123714	41.052	0.189449	0	7.50257e-15	61.226	0	0		NaN	0.186924	0	5.67768e-06	51.875					0	0		NaN	0.173175	0	0.00038854	44.511
A0A0R4J0Q5;P21619-2;P21619	417;276;398	A0A0R4J0Q5	A0A0R4J0Q5	Lamin-B2	Lmnb2		0.193881	0	7.50257e-15	61.375	53.464	61.375	0.193881	0	6.4873e-07	61.375					0.124837	0	0.00123714	41.052	0.189449	0	7.50257e-15	61.226	0	0		NaN	0.186924	0	5.67768e-06	51.875					0	0		NaN	0.173175	0	0.00038854	44.511
A0A0R4J0Q5;P21619-2;P21619	418;277;399	A0A0R4J0Q5	A0A0R4J0Q5	Lamin-B2	Lmnb2		0.193881	0	6.4873e-07	61.375	53.464	61.375	0.193881	0	6.4873e-07	61.375					0.124837	0	0.00123714	41.052					0	0		NaN	0.186924	0	5.67768e-06	51.875					0	0		NaN	0.173175	0	0.00038854	44.511
A0A0R4J0Q5;P21619-2;P21619	419;278;400	A0A0R4J0Q5	A0A0R4J0Q5	Lamin-B2	Lmnb2		0.193881	0	6.4873e-07	61.375	53.464	61.375	0.193881	0	6.4873e-07	61.375					0.124837	0	0.00123714	41.052					0	0		NaN	0.186924	0	5.67768e-06	51.875					0	0		NaN	0.173175	0	0.00038854	44.511
A0A0R4J0Q5;P21619-2;P21619	420;279;401	A0A0R4J0Q5	A0A0R4J0Q5	Lamin-B2	Lmnb2		0.140878	0	0.00123714	41.052	34.669	40.577	0.140878	0	0.00135382	40.577					0.124837	0	0.00123714	41.052					0	0		NaN	0	0		NaN					0	0		NaN
A0A0R4J0Q5;P21619-2;P21619	421;280;402	A0A0R4J0Q5	A0A0R4J0Q5	Lamin-B2	Lmnb2		0.164001	1.14482	9.04792e-07	51.218	44.978	42.789	0.140878	0	0.00135382	40.577					0.124837	0	0.00123714	41.052					0	0		NaN	0	0		NaN	0.150558	0.00717182	9.04792e-07	51.218	0	0		NaN					0.164001
A0A0R4J0Q5;P21619-2;P21619	422;281;403	A0A0R4J0Q5	A0A0R4J0Q5	Lamin-B2	Lmnb2		0.149024	0.89428	0.000201745	41.052	34.669	40.113					0.149024	0.89428	0.000201745	40.113	0.124837	0	0.00123714	41.052					0	0		NaN	0	0		NaN					0	0		NaN
A0A0R4J0Q6;Q80VI1	454;454	A0A0R4J0Q6	A0A0R4J0Q6	E3 ubiquitin-protein ligase TRIM56	Trim56		1	65.6288	6.08923e-10	79.311	68.717	79.311	0.999995	53.4456	4.53852e-07	71.697	0.999999	59.631	3.38002e-07	72.819	0.999958	43.745	7.78828e-06	54.288	1	65.6288	6.08923e-10	79.311	0.999705	35.2934	5.09418e-05	46.131	0.999961	44.0516	5.08788e-06	58.159	0.999971	45.3768	6.03249e-06	56.215	0.999737	35.7919	0.000144316	42.904	0.999743	35.8944	0.000206678	41.348	0.999892
A0A0R4J0S1	368	A0A0R4J0S1	A0A0R4J0S1				0.997974	27.0855	3.10146e-15	62.677	55.879	61.801	0.95097	12.8257	1.45829e-10	54.259	0.952804	12.8932	5.59562e-07	47.018	0.997908	26.9516	4.93436e-15	62.1	0.970226	15.1506	9.95244e-15	60.521	0.497927	0	4.50135e-15	62.237	0.958662	13.5037	2.17004e-10	54.259	0.988878	19.6402	1.81801e-10	53.475	0.997974	27.0855	3.10146e-15	62.677	0.984746	18.7705	1.1769e-07	47.38	0.981634
A0A0R4J0S1	371	A0A0R4J0S1	A0A0R4J0S1				0.997974	27.0855	3.10146e-15	62.677	55.879	61.801	0.95097	12.8257	1.45829e-10	54.259	0.952804	12.8932	5.59562e-07	47.018	0.997908	26.9516	4.93436e-15	62.1	0.970226	15.1506	9.95244e-15	60.521	0.497927	0	4.50135e-15	62.237	0.958662	13.5037	2.17004e-10	54.259	0.988878	19.6402	1.81801e-10	53.475	0.997974	27.0855	3.10146e-15	62.677	0.984746	18.7705	1.1769e-07	47.38	0.981634
A0A0R4J0S1;Q91W92	190;190	A0A0R4J0S1	A0A0R4J0S1	Cdc42 effector protein 1	Cdc42ep1		0.533413	2.78566	0.000440873	47.037	36.093	47.037	0	0		NaN	0	0		NaN									0	0		NaN	0	0		NaN	0.533413	2.78566	0.000440873	47.037									0
A0A0R4J0S1;Q91W92	139;139	A0A0R4J0S1	A0A0R4J0S1	Cdc42 effector protein 1	Cdc42ep1		0.953656	13.9253	7.87689e-08	48.655	40.037	47.989																									0.937769	12.9059	7.87689e-08	48.655	0.953656	13.9253	9.90886e-08	47.989					0.660915
A0A0R4J0S1;Q91W92	121;121	A0A0R4J0S1	A0A0R4J0S1	Cdc42 effector protein 1	Cdc42ep1		1	79.602	1.27138e-81	132.79	119.65	124.86	1	78.1497	3.18748e-72	122.04	0.999993	52.1096	2.56518e-25	93.753	0.999997	56.5305	8.13718e-26	93.767	1	66.9018	7.99965e-42	104.53	0.999994	55.075	6.81506e-33	97.284	0.999941	43.0588	7.44959e-14	80.683	1	79.602	7.90311e-73	124.86	1	67.1739	1.69663e-52	112.88	1	64.0319	4.13756e-42	105.79	1
A0A0R4J0S1;Q91W92	205;205	A0A0R4J0S1	A0A0R4J0S1	Cdc42 effector protein 1	Cdc42ep1		0.985978	18.4707	0.00132271	82.287	52.032	82.287									0.955607	13.3316	0.00842999	60.518	0	0		NaN	0.985978	18.4707	0.00132271	82.287					0	0		NaN	0	0		NaN	0	0		NaN	0.956923
A0A0R4J0S1;Q91W92	207;207	A0A0R4J0S1	A0A0R4J0S1	Cdc42 effector protein 1	Cdc42ep1		0.999884	39.5317	0.00199917	85.533	68.021	85.533	0.995226	23.192	0.00336947	76.943	0.995921	24.2157	0.0078614	61.56	0.999781	36.6801	0.0024414	83.499	0.998095	27.221	0.00467456	72.243	0	0		NaN	0.990574	20.254	0.00865716	60.102	0	0		NaN	0.995946	24.0375	0.00784307	61.593	0	0		NaN	0.999884
A0A1L1STY4;A0A1L1SVG0;A0A0R4J0S7;Q8CGB3-2;Q8CGB3;Q8CGB3-3	760;935;937;537;935;937	A0A1L1STY4	A0A1L1STY4	Uveal autoantigen with coiled-coil domains and ankyrin repeats	Uaca		0.738057	7.34146	0.0118731	48.741	17.319	48.741	0	0		NaN	0	0		NaN					0.738057	7.34146	0.0118731	48.741	0	0		NaN	0	0		NaN	0	0		NaN	0	0		NaN	0	0		NaN	0
A0A0R4J0S8;Q80YF6;Q80YF6-2	241;240;241	A0A0R4J0S8	A0A0R4J0S8	Uroplakin-3b	Upk3b		1	53.9678	0.022411	72.23	39.301	53.968	0	0		NaN	0	0		NaN	1	50.0403	0.044881	50.04	1	72.23	0.022411	72.23	0	0		NaN	0	0		NaN	0	0		NaN	1	58.9807	0.0307876	58.981	0	0		NaN	1
A0A0R4J0T8;Q9D8S3	241;241	A0A0R4J0T8	A0A0R4J0T8	ADP-ribosylation factor GTPase-activating protein 3	Arfgap3		0.966545	17.6179	1.61568e-17	120.96	86.267	120.96	0.965726	17.5092	2.10057e-12	112.13	0.825804	7.48193	3.6282e-08	91.961	0.914275	11.5388	2.31525e-05	78.692	0.965052	17.4216	6.35659e-15	117.98	0.82324	7.41688	7.71193e-06	84.479	0.966545	17.6179	1.61568e-17	120.96	0.858461	8.42417	6.98815e-08	89.403	0.925193	13.9332	1.68491e-14	115.33	0.96104	16.9321	4.45831e-11	97.911	0.876387
A0A0R4J0T8;Q9D8S3	373;372	A0A0R4J0T8	A0A0R4J0T8	ADP-ribosylation factor GTPase-activating protein 3	Arfgap3		0.255373	0	0.000523274	45.434	39.331	45.434																																	0.255373	0	0.000523274	45.434
A0A0R4J0T8;Q9D8S3	374;373	A0A0R4J0T8	A0A0R4J0T8	ADP-ribosylation factor GTPase-activating protein 3	Arfgap3		0.255373	0	0.000523274	45.434	39.331	45.434																																	0.255373	0	0.000523274	45.434
A0A0R4J0T8;Q9D8S3	375;374	A0A0R4J0T8	A0A0R4J0T8	ADP-ribosylation factor GTPase-activating protein 3	Arfgap3		0.975239	19.0321	2.2971e-20	100.45	86.035	99.566	0.96114	17.3005	0.000127416	63.709	0.562633	5.29636	0.000556136	44.925	0.968015	18.3929	4.71846e-09	82.102	0.975239	19.0321	6.53958e-20	99.566	0.681375	8.37678	9.47457e-05	65.704	0.707526	6.85013	1.60215e-08	81.619	0.701167	6.75666	7.89236e-08	78.932	0.700467	6.83115	6.81105e-11	86.641	0.255373	0	0.000523274	45.434	0.974828
A0A0R4J0U2;Q0VGB7;A0A0N4SV05	226;226;146	A0A0R4J0U2	A0A0R4J0U2	Serine/threonine-protein phosphatase 4 regulatory subunit 2	Ppp4r2		0.998929	29.7313	4.87857e-25	92.551	82.971	78.354	0.998929	29.7313	4.80009e-13	78.354	0.81055	6.38916	1.04082e-05	45.737	0.934391	11.6399	2.79135e-05	43.523	0	0		NaN	0.940839	12.0311	2.82568e-08	63.158	0.995581	23.5892	7.2784e-14	81.696	0.99848	28.1943	3.17258e-13	79.69	0.993447	21.9056	2.90135e-08	60.133	0.990886	20.3638	4.87857e-25	92.551	0.959432
A0A0R4J0U2;Q0VGB7	159;159	A0A0R4J0U2	A0A0R4J0U2	Serine/threonine-protein phosphatase 4 regulatory subunit 2	Ppp4r2		0.893929	10.7526	0.000125451	57.019	47.587	51.03	0	0		NaN					0.676644	4.36158	0.000414776	47.545	0.893929	10.7526	0.000235655	51.03					0	0		NaN	0.860621	8.01629	0.000197987	52.823	0.736107	5.52121	0.000937186	41.967					0.548048
A0A1B0GT60;G3XA27;A0A0R4J0U4;Q9JM61	391;399;452;452	A0A1B0GT60	A0A1B0GT60	Thrombospondin type-1 domain-containing protein 1	Thsd1		0.999583	33.7937	0.00032685	57.802	46.65	49.423	0.984032	17.8977	0.00343239	40.475									0	0		NaN									0.9958	23.7491	0.000800695	52.555					0.998884	29.5188	0.00032685	57.802
A0A0R4J0V4;Q9QXM1-3;Q9QXM1;A0A1Y7VLC3;Q9QXM1-2	130;130;130;130;130	A0A0R4J0V4	A0A0R4J0V4	Junction-mediating and -regulatory protein	Jmy		0.585312	1.49665	0.0205231	49.5	16.276	49.5	0	0		NaN	0	0		NaN	0	0		NaN					0	0		NaN	0	0		NaN	0	0		NaN	0	0		NaN	0.585312	1.49665	0.0205231	49.5	0
A0A0R4J0V4;Q9QXM1-3;Q9QXM1;A0A1Y7VLC3;Q9QXM1-2	134;134;134;134;134	A0A0R4J0V4	A0A0R4J0V4	Junction-mediating and -regulatory protein	Jmy		0.947831	12.5932	3.40328e-06	85.457	36.798	44.847	0	0		NaN	0	0		NaN	0	0		NaN	0.824285	6.71269	3.40328e-06	85.457	0	0		NaN	0	0		NaN	0	0		NaN	0.947831	12.5932	0.0318474	44.847	0	0		NaN	0.796476
A0A0R4J0V4;Q9QXM1-3;Q9QXM1	883;864;883	A0A0R4J0V4	A0A0R4J0V4	Junction-mediating and -regulatory protein	Jmy		0.499999	0	0.000124255	55.437	43.823	55.437	0.499999	0	0.000124255	55.437	0.499989	0	0.000503574	46.494													0	0		NaN	0	0		NaN
A0A0R4J0V4;Q9QXM1-3;Q9QXM1	884;865;884	A0A0R4J0V4	A0A0R4J0V4	Junction-mediating and -regulatory protein	Jmy		0.499999	0	0.000124255	55.437	43.823	55.437	0.499999	0	0.000124255	55.437	0.499989	0	0.000503574	46.494													0	0		NaN	0	0		NaN
A0A0R4J0V4;Q9QXM1-3;Q9QXM1	851;832;851	A0A0R4J0V4	A0A0R4J0V4	Junction-mediating and -regulatory protein	Jmy		0.83739	7.15808	1.10395e-05	45.395	32.207	45.395	0	0		NaN	0.83739	7.15808	1.10395e-05	45.395	0	0		NaN	0	0		NaN	0	0		NaN									0	0		NaN	0	0		NaN	0
A0A0R4J0V4;Q9QXM1-3;Q9QXM1;A0A1Y7VLC3;Q9QXM1-2	108;108;108;108;108	A0A0R4J0V4	A0A0R4J0V4	Junction-mediating and -regulatory protein	Jmy		1	88.146	1.80643e-08	93.348	81.482	93.348	0.999948	42.8325	0.00304663	49.423	0	0		NaN	1	85.5288	5.24436e-08	90.731	1	71.9363	1.75784e-05	80.469	0.999999	60.1993	0.000421938	64.65	0	0		NaN	1	88.146	1.80643e-08	93.348	1	74.0108	1.13797e-05	82.543	0	0		NaN	1
A0A0R4J0V5;P08775	1875;1913	A0A0R4J0V5	A0A0R4J0V5	DNA-directed RNA polymerase II subunit RPB1	Polr2a		0.750633	6.10876	0.000492105	63.128	43.451	63.128	0.423479	0	0.00321781	55.401					0.422004	0	0.0100124	40.589	0	0		NaN	0.437077	0.360509	0.00297832	41.644	0	0		NaN	0	0		NaN	0.750633	6.10876	0.000492105	63.128	0	0		NaN	0.747186
A0A0R4J0V5;P08775	1882;1920	A0A0R4J0V5	A0A0R4J0V5	DNA-directed RNA polymerase II subunit RPB1	Polr2a		0.472669	0	1.57082e-05	80.763	56.42	80.763	0	0		NaN	0.431888	0	0.00326029	55.314	0.43158	0	0.00165518	60.255	0.472669	0	1.57082e-05	80.763					0	0		NaN	0	0		NaN	0	0		NaN	0	0		NaN	0.461551
A0A0R4J0V5;P08775	1854;1892	A0A0R4J0V5	A0A0R4J0V5	DNA-directed RNA polymerase II subunit RPB1	Polr2a		0.538451	5.82019	6.63692e-07	54.288	41.727	52.784									0.518	5.58402	6.63692e-07	54.288	0.538451	5.82019	9.80045e-07	52.784																	0	0		NaN
A0A0R4J0V5;P08775	1858;1896	A0A0R4J0V5	A0A0R4J0V5	DNA-directed RNA polymerase II subunit RPB1	Polr2a		0.225712	0	7.9763e-05	49.606	42.235	49.606																	0.225712	0	7.9763e-05	49.606													0	0		NaN
A0A0R4J0V5;P08775	1840;1878	A0A0R4J0V5	A0A0R4J0V5	DNA-directed RNA polymerase II subunit RPB1	Polr2a		0.94824	14.1186	5.80455e-06	77.527	64.95	77.527	0.317199	0	0.00931435	48.741									0.31252	0.107733	0.00142111	48.112	0	0		NaN	0.609038	2.55553	3.35983e-05	70.332	0.462444	0	0.00196851	58.676	0.585342	3.57305	0.0016246	47.201	0.487203	0	0.00102935	63.408	0.94824
A0A0R4J0X8;Q9ES28-8;A0A1B0GRS3;Q9ES28-4;Q9ES28-3;Q9ES28-2;Q9ES28-7;Q9ES28;D3Z0V2;Q9ES28-6;Q9ES28-5	66;66;66;171;223;223;171;223;72;171;223	A0A0R4J0X8;Q9ES28-4	Q9ES28-4	Rho guanine nucleotide exchange factor 7	Arhgef7		0.884785	8.85327	0.00203866	46.408	38.497	46.408					0	0		NaN					0.884785	8.85327	0.00203866	46.408	0	0		NaN
A0A0R4J0X8;Q9ES28-8;A0A1B0GRS3;Q9ES28-4;Q9ES28-3;Q9ES28-2;Q9ES28-7;Q9ES28;D3Z0V2;Q9ES28-6;Q9ES28-5	71;71;71;176;228;228;176;228;77;176;228	A0A0R4J0X8;Q9ES28-4	Q9ES28-4	Rho guanine nucleotide exchange factor 7	Arhgef7		0.865175	8.07334	0.000827376	53.403	41.258	53.403	0.865175	8.07334	0.000827376	53.403	0	0		NaN									0	0		NaN									0.635517	2.41449	0.00153102	48.823
A0A0R4J0X8;Q9ES28-8;Q9ES28-4;Q9ES28-3;Q9ES28-2;Q9ES28-7;Q9ES28;D3Z0V2	560;619;665;701;717;724;776;550	A0A0R4J0X8;Q9ES28-4	Q9ES28-4	Rho guanine nucleotide exchange factor 7	Arhgef7		1	75.7641	4.55764e-15	98.943	76.95	75.764	1	58.0713	0.000843912	58.071	1	75.7641	2.60782e-05	75.764	1	84.5663	8.12828e-07	84.566	1	74.6784	4.0603e-05	74.678	1	85.9091	5.36271e-07	85.909	1	80.6319	6.78184e-06	80.632	1	71.2794	8.60791e-05	71.279	1	85.9091	5.36271e-07	85.909	1	98.9432	4.55764e-15	98.943	1
A0A0R4J0X8;Q9ES28-8;Q9ES28-4;Q9ES28-3;Q9ES28-2;Q9ES28-7;Q9ES28;D3Z0V2;Q9ES28-6;Q9ES28-5	516;516;621;598;673;621;673;447;621;673	A0A0R4J0X8;Q9ES28-4	Q9ES28-4	Rho guanine nucleotide exchange factor 7	Arhgef7		1	50.2836	0.0048316	54.471	34.684	50.284									1	45.8792	0.0157619	45.879					1	54.4709	0.00560499	54.471	1	48.7409	0.0048316	48.741	1	50.2836	0.00977671	50.284									1
A0A0R4J0X8;Q9ES28-8;Q9ES28-4;Q9ES28-3;Q9ES28-2;Q9ES28-7;Q9ES28;D3Z0V2;Q9ES28-6;Q9ES28-5	340;340;445;497;497;445;497;346;445;497	A0A0R4J0X8;Q9ES28-4	Q9ES28-4	Rho guanine nucleotide exchange factor 7	Arhgef7		0.999979	46.713	0.000752295	72.607	52.052	72.607	0.999745	35.9415	0.00318693	53.327	0.998675	28.7725	0.00771649	46.158	0.999155	30.726	0.00451143	48.091	0.998534	28.3323	0.00770001	45.718	0.999924	41.163	0.00153512	62.463	0.99572	23.6667	0.0097877	41.652					0.99996	44.0281	0.000924012	68.847	0.999979	46.713	0.000752295	72.607	0.999978
A0A0R4J0X8;Q9ES28-8;F6WMJ3;Q8K4I3;A2AFJ8;Q9ES28-4;Q9ES28-3;Q9ES28-2;Q9ES28-7;Q9ES28;D3Z0V2;Q9ES28-6;Q9ES28-5	525;525;672;648;360;630;607;682;630;682;456;630;682	A0A0R4J0X8;F6WMJ3;Q9ES28-4	Q9ES28-4	Rho guanine nucleotide exchange factor 7;Rho guanine nucleotide exchange factor 6	Arhgef7;Arhgef6		0.5	0	5.37207e-27	125.82	109.94	108.59	0.5	0	6.91273e-26	122.46	0.5	0	1.89082e-18	108.59	0.5	0	4.02149e-22	118.37	0.5	0	1.63324e-17	104.94	0.5	0	6.23559e-19	111.79	0.5	0	5.37207e-27	125.82	0.5	0	3.73629e-26	124.12	0.5	0	6.93589e-26	122.45	0.5	0	6.31141e-23	119.39	0.5
A0A0R4J0X8;Q9ES28-8;A0A1B0GRS3	7;7;7	A0A0R4J0X8	A0A0R4J0X8	Rho guanine nucleotide exchange factor 7	Arhgef7		0.999967	47.446	4.81612e-11	87.363	75.873	87.363	0.999189	31.7611	1.17507e-05	77.64	0.997699	26.8991	1.70501e-05	75.695					0.986061	20.846	0.000270383	61.435	0.999967	47.446	9.99135e-07	87.363									0.997442	28.9207	0.000106799	68.069	0	0		NaN	0.978192
D3Z1R6;D3Z5R9;A0A0R4J102;Q7TN99-5;Q7TN99-4;Q7TN99-3;Q7TN99-2;Q7TN99	194;194;194;194;194;194;194;194	D3Z1R6	D3Z1R6	Cytoplasmic polyadenylation element-binding protein 3	Cpeb3		0.999999	59.4594	1.88861e-26	108.18	69.294	92.65	0.854759	7.70412	4.04909e-08	86.467	0.999413	33.3896	0.000276621	50.088	0.996589	24.5416	1.83449e-05	68.034	0.999999	59.4594	1.88861e-26	108.18	0.936434	12.0385	2.19471e-05	67.234	0.941041	12.1128	5.05004e-05	62.042	0.964154	14.6447	2.51097e-05	66.533	0.905537	9.83071	1.766e-06	77.13	0.998726	29.9104	0.00401916	43.03	0.997837
D3Z1R6;D3Z5R9;A0A0R4J102;Q7TN99-5;Q7TN99-4;Q7TN99-3;Q7TN99-2;Q7TN99	197;197;197;197;197;197;197;197	D3Z1R6	D3Z1R6	Cytoplasmic polyadenylation element-binding protein 3	Cpeb3		0.999928	42.2012	7.61587e-28	131.13	110.67	119.39	0.999291	33.7721	1.39552e-18	109.84	0.999677	35.2528	3.68221e-19	112.44	0.999928	42.2012	6.31141e-23	119.39	0.999796	36.9394	7.61587e-28	131.13	0.999655	34.6507	1.48247e-21	115.12	0.998801	29.3405	1.74397e-13	98.942	0.999533	33.354	1.65749e-27	130.1	0.997843	26.6705	7.84037e-19	111.39	0.999403	32.3011	6.23559e-19	111.79	0.996223
A0A0R4J107;Q8R146-2;Q8R146	186;187;187	A0A0R4J107	A0A0R4J107	Acylamino-acid-releasing enzyme	Apeh		0.993932	22.1429	2.05849e-25	103.21	74.581	92.063	0.984127	17.924	3.03651e-09	83.729	0.993423	21.7909	0.000286197	71.879	0.993932	22.1429	5.01762e-13	92.063	0.832751	6.97151	0.00383977	50.155	0.944252	12.2886	0.00181873	63.185	0.84031	7.21162	0.000875804	42.317	0.98365	17.7934	2.05849e-25	103.21	0.975318	15.9677	0.000176735	73.499	0.981448	17.2347	1.6954e-13	93.823	0.816436
A0A0U1RPT3;A0A0U1RPX7;A0A0R4J113;Q5MJ56;P97479-2;P97479	92;1520;1520;1526;1531;1569	A0A0U1RPT3	A0A0U1RPT3	Unconventional myosin-VIIa	Myo7a		0.49985	0	0.0030943	63.408	17.529	63.408	0.497329	0	0.0030943	44.543					0	0		NaN	0.49985	0	0.00752091	63.408	0	0		NaN																	0
A0A0R4J124;O54781	490;489	A0A0R4J124	A0A0R4J124	SRSF protein kinase 2;SRSF protein kinase 2 N-terminal;SRSF protein kinase 2 C-terminal	Srpk2		0.397381	1.52541	0.000109341	68.069	34.202	56.225	0	0		NaN	0	0		NaN	0.397381	1.52541	0.000804124	56.225									0.390886	1.52541	0.000804124	56.225	0.332407	0	0.000109341	68.069	0	0		NaN					0.322278
A0A0R4J124;O54781	491;490	A0A0R4J124	A0A0R4J124	SRSF protein kinase 2;SRSF protein kinase 2 N-terminal;SRSF protein kinase 2 C-terminal	Srpk2		0.532948	2.56099	0.000109341	68.069	34.202	61.235	0	0		NaN	0	0		NaN					0.532948	2.56099	0.000402118	61.235									0.332407	0	0.000109341	68.069	0	0		NaN					0.322278
A2AQZ5;A2AQZ2;A2AQZ7;A0A0R4J137;Q9DB26	160;203;186;227;207	A2AQZ5	A2AQZ5	Phytanoyl-CoA dioxygenase domain-containing protein 1	Phyhd1		0.199827	0	2.6911e-08	46.678	43.85	46.678													0.199683	0	1.41686e-06	43.895																					0.199827
A2AQZ5;A2AQZ2;A2AQZ7;A0A0R4J137;Q9DB26	162;205;188;229;209	A2AQZ5	A2AQZ5	Phytanoyl-CoA dioxygenase domain-containing protein 1	Phyhd1		0.199827	0	2.6911e-08	46.678	43.85	46.678													0.199683	0	1.41686e-06	43.895																					0.199827
A2AQZ5;A2AQZ2;A2AQZ7;A0A0R4J137;Q9DB26	167;210;193;234;214	A2AQZ5	A2AQZ5	Phytanoyl-CoA dioxygenase domain-containing protein 1	Phyhd1		0.205387	0	2.6911e-08	46.678	43.85	40.756					0.205387	0	7.66461e-06	40.756					0.199683	0	1.41686e-06	43.895																					0.199827
A2AQZ5;A2AQZ2;A2AQZ7;A0A0R4J137;Q9DB26	171;214;197;238;218	A2AQZ5	A2AQZ5	Phytanoyl-CoA dioxygenase domain-containing protein 1	Phyhd1		0.205387	0	2.6911e-08	46.678	43.85	40.756					0.205387	0	7.66461e-06	40.756					0.199683	0	1.41686e-06	43.895																					0.199827
D3YUC9;A0A0R4J139	2;2	D3YUC9	D3YUC9		Msrb3		1	119.876	9.72538e-22	136.24	85.89	124.86	1	124.605	9.72538e-22	136.24	1	119.876	2.27863e-18	124.86	1	117.932	1.33004e-18	125.61	1	117.467	5.3074e-18	122.45	1	100.715	3.8842e-12	108.17	1	124.402	2.83174e-21	132.47					1	127.492	2.83174e-21	132.47	1	118.274	5.3074e-18	122.45	1
Z4YLI8;A0A0R4J140;Q5SW19-2;Q5SW19-3;Q5SW19	688;688;650;650;650	Z4YLI8	Z4YLI8	Clustered mitochondria protein homolog	Cluh		0.738697	7.59815	3.2418e-05	45.723	27.915	43.791	0	0		NaN	0	0		NaN	0.738697	7.59815	7.76884e-05	43.791	0	0		NaN	0	0		NaN	0	0		NaN	0	0		NaN									0.446379
A0A0R4J171;Q9R0Z9-2;E9QKB1;E9PXD2;Q9R0Z9	332;332;298;749;298	A0A0R4J171	A0A0R4J171	Rho GTPase-activating protein 7	Dlc1		0.202033	0	1.09855e-12	52.122	45.758	52.122					0	0		NaN	0	0		NaN	0	0		NaN
A0A0R4J171;Q9R0Z9-2;E9QKB1;E9PXD2;Q9R0Z9	334;334;300;751;300	A0A0R4J171	A0A0R4J171	Rho GTPase-activating protein 7	Dlc1		0.202033	0	1.09855e-12	52.122	45.758	52.122					0	0		NaN	0	0		NaN	0	0		NaN
A0A0R4J171;Q9R0Z9-2;E9QKB1;E9PXD2;Q9R0Z9	336;336;302;753;302	A0A0R4J171	A0A0R4J171	Rho GTPase-activating protein 7	Dlc1		0.202033	0	1.09855e-12	52.122	45.758	52.122					0	0		NaN	0	0		NaN	0	0		NaN
A0A0R4J171;Q9R0Z9-2;E9QKB1;E9PXD2;Q9R0Z9	584;584;550;1001;550	A0A0R4J171	A0A0R4J171	Rho GTPase-activating protein 7	Dlc1		0.998257	28.2055	0.00108714	47.037	31.173	47.037	0.997846	27.0462	0.00272559	43.184	0.997653	26.672	0.00187444	42.809	0	0		NaN	0	0		NaN	0	0		NaN	0	0		NaN	0.998257	28.2055	0.00108714	47.037	0	0		NaN	0	0		NaN	0
A0A0R4J171;Q9R0Z9-2;E9QKB1;E9PXD2;Q9R0Z9	589;589;555;1006;555	A0A0R4J171	A0A0R4J171	Rho GTPase-activating protein 7	Dlc1		0.328045	0	4.9962e-12	47.479	41.21	47.479	0	0		NaN	0	0		NaN	0	0		NaN	0	0		NaN	0	0		NaN	0	0		NaN					0.328045	0	4.9962e-12	47.479	0	0		NaN	0
A0A0R4J171;Q9R0Z9-2	22;22	A0A0R4J171	A0A0R4J171	Rho GTPase-activating protein 7	Dlc1		0.999156	30.7329	0.0305141	59.245	25.448	59.245	0	0		NaN									0	0		NaN									0.999156	30.7329	0.0305141	59.245									0.996609
A0A0R4J171;Q9R0Z9-2;E9QKB1;E9PXD2;Q9R0Z9	193;193;159;610;159	A0A0R4J171	A0A0R4J171	Rho GTPase-activating protein 7	Dlc1		0.947663	13.0989	9.20824e-06	47.32	37.629	47.32					0	0		NaN													0	0		NaN					0.947663	13.0989	9.20824e-06	47.32
A0A0R4J171;Q9R0Z9-2;E9QKB1;E9PXD2;Q9R0Z9	440;440;406;857;406	A0A0R4J171	A0A0R4J171	Rho GTPase-activating protein 7	Dlc1		0.971181	15.2771	1.98574e-05	67.416	57.544	58.09	0.95565	13.3343	2.45689e-05	66.335	0.963805	14.2599	0.000683251	47.568	0.939633	11.9395	0.00123238	42.913	0.958061	13.588	1.98574e-05	67.416	0.876106	8.49668	0.000539841	49.049	0.969932	15.0879	0.000152943	56.959	0.95297	13.0702	0.000384448	50.653	0.971181	15.2771	0.000127505	58.09	0	0		NaN	0.922376
A0A0R4J172	7	A0A0R4J172	A0A0R4J172				1	78.4134	4.55948e-13	78.413	74.445	78.413	0	0		NaN	0	0		NaN	0	0		NaN	1	44.2579	1.92268e-05	44.258	0	0		NaN	1	64.203	2.4826e-08	64.203	1	52.509	2.17928e-07	52.509	0	0		NaN	0	0		NaN	1
A0A0R4J172;F6RXE7;Q3U1Y4-3;Q3U1Y4	941;69;815;930	A0A0R4J172	A0A0R4J172	DENN domain-containing protein 4B	Dennd4b		0.615627	3.26513	3.13747e-05	40.937	35.232	40.937	0	0		NaN									0.615627	3.26513	3.13747e-05	40.937	0	0		NaN	0	0		NaN	0	0		NaN	0	0		NaN	0	0		NaN	0
A0A0R4J172;F6RXE7;Q3U1Y4-3;Q3U1Y4;Q3U1Y4-2	956;84;830;945;659	A0A0R4J172	A0A0R4J172	DENN domain-containing protein 4B	Dennd4b		0.991099	21.366	0.000302541	62.891	54.162	45.115	0.940302	12.1429	0.00256565	45.347					0	0		NaN	0.899459	9.67501	0.00188685	48.823	0	0		NaN									0	0		NaN					0.991099
F6YB25;A0A0R4J195;Q9CSU0-3;Q9CSU0-2;Q9CSU0	33;132;132;132;132	F6YB25	F6YB25	Regulation of nuclear pre-mRNA domain-containing protein 1B	Rprd1b		0.583818	1.47224	0.000352662	58.071	50.16	58.071	0	0		NaN					0.564477	1.14741	0.00137643	48.112					0.583818	1.47224	0.000352662	58.071									0	0		NaN
F6YB25;A0A0R4J195;Q9CSU0-3;Q9CSU0-2;Q9CSU0	35;134;134;134;134	F6YB25	F6YB25	Regulation of nuclear pre-mRNA domain-containing protein 1B	Rprd1b		0.971318	15.2976	2.88301e-06	86.641	77.591	86.641	0.971318	15.2976	2.88301e-06	86.641	0.885147	8.93718	0.00014155	63.709					0.794711	5.87848	4.36021e-05	77.222	0	0		NaN	0.95544	13.3128	2.62171e-05	79.81	0.846027	7.40023	0.000109998	65.472	0.921135	10.6745	3.91919e-05	72.315	0.958918	13.6863	0.00013824	63.894	0.967535
F6YB25;A0A0R4J195;Q9CSU0-3;Q9CSU0-2;Q9CSU0	64;163;164;164;164	F6YB25	F6YB25	Regulation of nuclear pre-mRNA domain-containing protein 1B	Rprd1b		0.311555	0	1.50381e-22	59.017	55.459	54.05					0.30937	0	4.91428e-09	42.571	0.310943	0	2.25725e-12	47.59	0.290048	0	5.80311e-10	44.706	0.29468	0	4.07154e-17	53.408	0.297341	0	1.25552e-09	44.347					0.307795	0	1.50381e-22	59.017					0.311555
F6YB25;A0A0R4J195;Q9CSU0-3;Q9CSU0-2;Q9CSU0	66;165;166;166;166	F6YB25	F6YB25	Regulation of nuclear pre-mRNA domain-containing protein 1B	Rprd1b		0.311555	0	1.50381e-22	59.017	55.459	54.05					0.30937	0	4.91428e-09	42.571	0.310943	0	2.25725e-12	47.59	0.290048	0	5.80311e-10	44.706	0.29468	0	4.07154e-17	53.408	0.297341	0	1.25552e-09	44.347					0.307795	0	1.50381e-22	59.017					0.311555
A0A0R4J196;F8WH31;E9PUD1;Q58A65-6;Q58A65-3;Q58A65-4;Q58A65-5;Q58A65-2;Q58A65;F6SH61;Z4YMB8;F6WNT4	548;553;553;526;552;548;691;691;705;541;272;341	A0A0R4J196	A0A0R4J196	C-Jun-amino-terminal kinase-interacting protein 4	Spag9		1	65.3793	9.74583e-21	88.021	69.985	88.021	0.999898	39.9977	0.000283465	60.301													1	65.3793	9.74583e-21	88.021	0.998985	30.4264	0.00361938	43.382	0	0		NaN	0.999726	36.508	0.0023299	46.88					0.99998
A0A0R4J196;F8WH31;E9PUD1;Q58A65-6;Q58A65-3;Q58A65-4;Q58A65-5;Q58A65-2;Q58A65;F6SH61;F6WNT4	60;60;60;38;60;60;203;203;203;39;60	A0A0R4J196	A0A0R4J196	C-Jun-amino-terminal kinase-interacting protein 4	Spag9		0.999827	40.5921	3.33476e-05	42.347	35.071	42.347	0	0		NaN	0	0		NaN									0	0		NaN	0	0		NaN													0.999827
A0A0R4J196;F8WH31;E9PUD1;Q58A65-6;Q58A65-3;Q58A65-4;Q58A65-5;Q58A65-2;Q58A65;F6SH61;Z4YMB8	436;440;441;414;440;436;579;579;593;429;160	A0A0R4J196	A0A0R4J196	C-Jun-amino-terminal kinase-interacting protein 4	Spag9		0.520681	1.36551	0.000403551	58.674	32.631	46.481	0	0		NaN	0.332328	0	0.00202356	45.14	0	0		NaN	0.333121	0	0.000775181	58.674	0.333212	0	0.000403551	55.975	0.332521	0	0.00376447	47.288	0	0		NaN	0	0		NaN	0	0		NaN	0
A0A0R4J196;F8WH31;E9PUD1;Q58A65-6;Q58A65-3;Q58A65-4;Q58A65-5;Q58A65-2;Q58A65;F6SH61;Z4YMB8	437;441;442;415;441;437;580;580;594;430;161	A0A0R4J196	A0A0R4J196	C-Jun-amino-terminal kinase-interacting protein 4	Spag9		0.333212	0	0.000403551	58.674	32.631	55.975	0	0		NaN	0.332328	0	0.00202356	45.14	0	0		NaN	0.333121	0	0.000775181	58.674	0.333212	0	0.000403551	55.975	0.332521	0	0.00376447	47.288	0	0		NaN	0	0		NaN	0	0		NaN	0
A0A0R4J196;F8WH31;E9PUD1;Q58A65-6;Q58A65-3;Q58A65-4;Q58A65-5;Q58A65-2;Q58A65;F6SH61;Z4YMB8;F6WNT4	571;576;576;549;575;571;714;714;728;564;295;364	A0A0R4J196	A0A0R4J196	C-Jun-amino-terminal kinase-interacting protein 4	Spag9		0.5	0	0.00135261	53.08	40.698	53.08	0	0		NaN	0	0		NaN	0	0		NaN													0	0		NaN	0	0		NaN					0
A0A0R4J196;F8WH31;E9PUD1;Q58A65-6;Q58A65-3;Q58A65-4;Q58A65-5;Q58A65-2;Q58A65;F6SH61;Z4YMB8;F6WNT4	573;578;578;551;577;573;716;716;730;566;297;366	A0A0R4J196	A0A0R4J196	C-Jun-amino-terminal kinase-interacting protein 4	Spag9		0.985163	18.8472	1.82782e-09	82.529	65.533	82.529	0.780838	4.46878	7.81263e-07	78.191	0.920884	10.535	0.000946711	56.527	0.557702	1.12348	0.0025257	47.532	0.780409	5.73965	0.000190334	70.26	0.901462	11.154	0.00012333	72.321	0.847787	8.16678	0.00186729	50.079	0	0		NaN	0.985163	18.8472	1.82782e-09	82.529	0.869579	6.09609	0.00265346	47.037	0.764425
A0A0R4J196;F8WH31;E9PUD1;Q58A65-6;Q58A65-3;Q58A65-4;Q58A65-5;Q58A65-2;Q58A65;F6SH61;Z4YMB8;F6WNT4	575;580;580;553;579;575;718;718;732;568;299;368	A0A0R4J196	A0A0R4J196	C-Jun-amino-terminal kinase-interacting protein 4	Spag9		0.591859	0.719697	2.54201e-09	84.507	58.791	47.037	0.482026	0	0.0030805	51.979	0	0		NaN	0.529032	0.567612	0.0025257	47.532	0.558274	0.998434	0.000190334	70.26									0	0		NaN	0.4837	0	0.000536619	45.618	0.591859	0.719697	0.00176656	57.348	0.53956
A0A0R4J196;F8WH31;E9PUD1;Q58A65-6;Q58A65-3;Q58A65-4;Q58A65-5;Q58A65-2;Q58A65;F6SH61;Z4YMB8;F6WNT4	576;581;581;554;580;576;719;719;733;569;300;369	A0A0R4J196	A0A0R4J196	C-Jun-amino-terminal kinase-interacting protein 4	Spag9		0.944571	13.4826	3.35575e-13	92.943	73.302	50.079	0.781295	4.46878	7.81263e-07	78.191	0.761989	4.88409	0.000946711	56.527	0	0		NaN	0.805056	6.18463	1.02975e-12	89.266	0.769016	5.22983	3.35575e-13	92.943	0.944571	13.4826	0.00186729	50.079	0	0		NaN	0.76496	5.10913	1.82782e-09	82.529	0.490249	0	0.00176656	57.348	0.469301
A0A0R4J196;F8WH31;E9PUD1;Q58A65-6;Q58A65-3;Q58A65-4;Q58A65-5;Q58A65-2;Q58A65;Z4YMB8	1031;1036;1036;1009;1035;1044;1174;1174;1188;768	A0A0R4J196	A0A0R4J196	C-Jun-amino-terminal kinase-interacting protein 4	Spag9		0.999662	34.7116	1.44712e-26	111.43	103.26	88.992	0.99935	31.8688	4.5323e-11	93.51	0.99935	31.8688	4.5323e-11	93.51	0.993107	26.3568	0.000132884	60.209									0.999539	33.364	1.44712e-26	111.43	0.999662	34.7116	2.14389e-10	88.992									0
A0A0R4J199;Q08EC4-3;Q08EC4-2;Q08EC4	297;297;299;297	A0A0R4J199	A0A0R4J199	Cas scaffolding protein family member 4	Cass4		0.99968	38.8419	0.00037469	63.128	50.915	53.403									0	0		NaN	0	0		NaN	0.994786	26.5862	0.00188968	44.252	0	0		NaN									0.994733	25.4473	0.00037469	63.128
A0A0R4J1A1;Q9QZD5	207;207	A0A0R4J1A1	A0A0R4J1A1	Rab proteins geranylgeranyltransferase component A 2	Chml		1	46.5921	0.00325738	48.796	19.709	46.592	0	0		NaN																	1	48.7963	0.00325738	48.796	1	46.5921	0.00399839	46.592
A0A0R4J1B6;Q6PAL8	169;193	A0A0R4J1B6	A0A0R4J1B6	DENN domain-containing protein 5A	Dennd5a		0.999372	32.2618	0.00566994	68.657	57.493	68.657	0.999372	32.2618	0.00566994	68.657	0.985175	18.4036	0.00781224	61.65	0.984952	18.427	0.0140698	51.268	0	0		NaN	0.975503	16.1796	0.00902649	59.426	0.973939	15.8713	0.00586512	67.726	0.984952	18.427	0.0140698	51.268	0.967985	15.0501	0.0139558	51.445	0	0		NaN	0.983895
A0A0R4J1B6;Q6PAL8	827;851	A0A0R4J1B6	A0A0R4J1B6	DENN domain-containing protein 5A	Dennd5a		0.974334	15.8101	3.03849e-06	69.431	58.161	44.616	0.963312	14.2031	0.0300452	43.544	0	0		NaN	0.921688	10.7076	3.03849e-06	69.431	0	0		NaN	0	0		NaN	0	0		NaN	0.974334	15.8101	0.0260264	44.616	0	0		NaN	0	0		NaN	0
A0A0R4J1B6;Q6PAL8	1061;1085	A0A0R4J1B6	A0A0R4J1B6	DENN domain-containing protein 5A	Dennd5a		0.909096	10.0003	7.06558e-05	72.891	58.225	72.891																					0.909096	10.0003	7.06558e-05	72.891
F7CPL2;A0A0R4J1E3;Q9QXS6-2;Q9QXS6-3;Q9QXS6	79;142;142;142;142	F7CPL2	F7CPL2	Drebrin	Dbn1		0.999013	30.0514	0.00319628	78.334	54.18	78.334	0.984774	18.1075	0.00637237	65.305					0.836034	7.07469	0.0230118	45.161					0.818704	6.5474	0.0182159	48.423	0.999013	30.0514	0.00319628	78.334	0.874882	8.44628	0.0105665	56.729	0.836034	7.07469	0.0230118	45.161	0	0		NaN	0
A6PWP8;A2AGR1;A2AGQ3;A2AGQ2;A0A0R4J1F4;A2AGQ8;A2AGQ7;A2AGQ9;A2AGR0;A2AGQ5;A2AGQ6;E9QN47;A2AGQ4;Q80U28-13;Q80U28-12;Q80U28-11;Q80U28-10;Q80U28-9;Q80U28-8;Q80U28-7;Q80U28-6;Q80U28-5;Q80U28-4;Q80U28-3;Q80U28-2;Q80U28-15;Q80U28;Q80U28-14	1038;995;995;1019;1038;1015;1038;1039;1058;1058;1038;1038;1058;1038;1013;1019;1013;1013;1038;1039;1013;1013;1058;1038;1058;1058;1058;1038	A6PWP8	A6PWP8	MAP kinase-activating death domain protein	Madd		0.499859	0	0.00232446	40.477	33.596	40.477					0	0		NaN													0.499859	0	0.00232446	40.477	0	0		NaN					0	0		NaN
D3YTP0;A0A0R4J1G9;E9QN92;Q8CI59;Q8CI59-2	20;20;58;20;58	D3YTP0	D3YTP0	Metalloreductase STEAP3	Steap3		0.99653	24.5812	1.0324e-05	81.494	69.28	72.496	0.956665	13.4392	5.42879e-05	67.964	0.99653	24.5812	3.29643e-05	72.496	0.881058	8.69671	0.00498172	40.331					0	0		NaN	0.830012	6.88666	5.38367e-05	67.997	0.944866	12.3395	2.94895e-05	70.438	0	0		NaN	0.927737	11.0851	0.00558272	45.972	0.872516
A0A0R4J1H6;E9QP99;P55937-1;P55937	236;276;236;276	A0A0R4J1H6	A0A0R4J1H6	Golgin subfamily A member 3	Golga3		0.330248	0	5.01306e-06	67.416	49.672	67.416	0.330248	0	5.01306e-06	67.416									0.318785	0	9.2118e-06	59.261					0	0		NaN	0	0		NaN
A0A0R4J1H6;E9QP99;P55937-1;P55937	237;277;237;277	A0A0R4J1H6	A0A0R4J1H6	Golgin subfamily A member 3	Golga3		0.330248	0	5.01306e-06	67.416	49.672	67.416	0.330248	0	5.01306e-06	67.416									0.318785	0	9.2118e-06	59.261					0	0		NaN	0	0		NaN
A0A0R4J1H6;E9QP99;P55937-1;P55937	239;279;239;279	A0A0R4J1H6	A0A0R4J1H6	Golgin subfamily A member 3	Golga3		0.294094	0.977919	9.9162e-06	56.514	41.912	43.791					0.294094	0.977919	0.000187231	43.791	0.278898	0.646745	1.51639e-05	53.169									0	0		NaN	0	0		NaN	0.284157	0.759103	9.9162e-06	56.514	0.271792	0.493562	0.000187231	43.791	0.26854
A0A0R4J1H8;Q9QXN0-4;Q9QXN0-2;A0A286YDQ8;E9QMY5;Q9QXN0-3;Q9QXN0	728;728;728;822;903;903;903	A0A0R4J1H8	A0A0R4J1H8	Protein Shroom3	Shroom3		0.491244	0.280412	2.46919e-07	53.55	46.974	52.402	0.491244	0.280412	3.19805e-07	52.402	0.476743	0.579601	2.46919e-07	53.55					0	0		NaN									0.458725	0	6.05566e-07	51.175	0.342396	0	2.99502e-05	42.325	0	0		NaN	0.343687
A0A0R4J1H8;Q9QXN0-4;Q9QXN0-2;A0A286YDQ8;E9QMY5;Q9QXN0-3;Q9QXN0	737;737;737;831;912;912;912	A0A0R4J1H8	A0A0R4J1H8	Protein Shroom3	Shroom3		0.993371	23.1951	1.01208e-08	57.351	51.92	57.351									0.925551	10.3367	4.07161e-05	45.784	0	0		NaN									0	0		NaN	0.983661	20.1627	2.99502e-05	44.05	0	0		NaN	0.993371
A0A0R4J1H8;Q9QXN0-4;Q9QXN0-2;A0A286YDQ8;E9QMY5;Q9QXN0-3;Q9QXN0;E9Q6I3	500;500;500;594;675;675;675;675	A0A0R4J1H8	A0A0R4J1H8	Protein Shroom3	Shroom3		1	47.7543	3.16023e-62	126.45	117.9	47.754	1	124.195	1.09437e-58	124.19	1	47.7543	1.85201e-05	47.754	1	122.34	2.36719e-58	122.34	1	101.495	2.01183e-33	101.5	1	96.3414	7.20934e-26	96.341	1	50.2522	8.8959e-06	50.252	1	119.996	3.97661e-58	120	1	121.246	3.11857e-58	121.25					1
A0A0R4J1H8;Q9QXN0-4;Q9QXN0-2;A0A286YDQ8;E9QMY5;Q9QXN0-3;Q9QXN0;E9Q6I3	484;484;484;578;659;659;659;659	A0A0R4J1H8	A0A0R4J1H8	Protein Shroom3	Shroom3		0.393739	1.13645	0.00217751	44.765	32.599	44.765					0.393728	1.13645	0.00217751	44.765													0	0		NaN					0.393739	1.13645	0.00217751	44.765	0	0		NaN
A0A0R4J1H8;Q9QXN0-4;Q9QXN0-2;A0A286YDQ8;E9QMY5;Q9QXN0-3;Q9QXN0;E9Q6I3	487;487;487;581;662;662;662;662	A0A0R4J1H8	A0A0R4J1H8	Protein Shroom3	Shroom3		0.482237	0	0.000222658	60.434	43.408	56.094	0.482237	0	0.000395376	56.094					0.472505	0	0.000222658	60.434					0.469772	0	0.00111059	49.5	0	0		NaN									0	0		NaN
A0A0R4J1H8;Q9QXN0-4;Q9QXN0-2;A0A286YDQ8;E9QMY5;Q9QXN0-3;Q9QXN0;E9Q6I3	488;488;488;582;663;663;663;663	A0A0R4J1H8	A0A0R4J1H8	Protein Shroom3	Shroom3		0.77727	5.73272	0.000222658	60.434	43.408	51.092	0.482237	0	0.000395376	56.094					0.472505	0	0.000222658	60.434	0.609757	2.2535	0.000297808	57.679	0.469772	0	0.00111059	49.5	0	0		NaN									0	0		NaN	0.77727
A0A0R4J1H8;Q9QXN0-4;Q9QXN0-2;A0A286YDQ8;E9QMY5;Q9QXN0-3;Q9QXN0;E9Q6I3;G3UXH3	108;108;108;202;283;283;283;283;108	A0A0R4J1H8	A0A0R4J1H8	Protein Shroom3	Shroom3		0.547371	0.826711	0.00498023	46.706	29.93	46.706													0.499988	0	0.00498023	46.706																	0	0		NaN
A0A0R4J1H8;Q9QXN0-4;Q9QXN0-2;A0A286YDQ8;E9QMY5;Q9QXN0-3;Q9QXN0;E9Q6I3;G3UXH3	110;110;110;204;285;285;285;285;110	A0A0R4J1H8	A0A0R4J1H8	Protein Shroom3	Shroom3		0.967802	14.7846	0.00162509	55.401	38.624	53.567	0.826236	6.77427	0.00573311	45.077					0.858795	7.84156	0.00162509	55.401	0.499988	0	0.00498023	46.706	0.527935	0.488722	0.0172213	41.598	0.967802	14.7846	0.00218087	53.567									0	0		NaN	0.692619
A0A0R4J1H8;Q9QXN0-4;Q9QXN0-2;A0A286YDQ8;E9QMY5;Q9QXN0-3;Q9QXN0	794;794;794;888;969;969;969	A0A0R4J1H8	A0A0R4J1H8	Protein Shroom3	Shroom3		0.998899	34.1012	0.000336947	44.382	34.849	44.382	0	0		NaN	0	0		NaN	0	0		NaN	0	0		NaN	0	0		NaN									0	0		NaN	0.998899	34.1012	0.000336947	44.382
A0A0R4J1H8;Q9QXN0-4;Q9QXN0-2;A0A286YDQ8;E9QMY5;Q9QXN0-3;Q9QXN0	801;801;801;895;976;976;976	A0A0R4J1H8	A0A0R4J1H8	Protein Shroom3	Shroom3		0.334198	0.512457	1.50619e-10	86.898	66.471	41.86	0.314395	0	0.000259876	47.09	0.315668	0	1.50619e-10	86.898	0.313472	0	0.000416569	53.001	0.311403	0	9.6826e-05	56.215	0.298864	0	0.000452012	41.386					0.318947	0	0.000222823	59.898	0.320016	0	5.6703e-05	70.412	0.334198	0.512457	0.000433819	51.726	0.315814
A0A0R4J1H8;Q9QXN0-4;Q9QXN0-2;A0A286YDQ8;E9QMY5;Q9QXN0-3;Q9QXN0	802;802;802;896;977;977;977	A0A0R4J1H8	A0A0R4J1H8	Protein Shroom3	Shroom3		0.322631	0	1.50619e-10	86.898	66.471	48.14	0.314395	0	0.000259876	47.09	0.315668	0	1.50619e-10	86.898	0.313472	0	0.000416569	53.001	0.311403	0	9.6826e-05	56.215	0.298864	0	0.000452012	41.386					0.318947	0	0.000222823	59.898	0.320016	0	5.6703e-05	70.412	0.3099	0	0.000462495	51.726	0.315814
A0A0R4J1H8;Q9QXN0-4;Q9QXN0-2;A0A286YDQ8;E9QMY5;Q9QXN0-3;Q9QXN0	803;803;803;897;978;978;978	A0A0R4J1H8	A0A0R4J1H8	Protein Shroom3	Shroom3		0.585968	5.53605	1.50619e-10	86.898	66.471	55.589	0.314395	0	0.000259876	47.09	0.585968	5.53605	1.50619e-10	86.898	0.313472	0	0.000416569	53.001	0.311403	0	9.6826e-05	56.215	0.298864	0	0.000452012	41.386					0.318947	0	0.000222823	59.898	0.320016	0	5.6703e-05	70.412	0.3099	0	0.000462495	51.726	0.315814
A0A0R4J1H8;Q9QXN0-4;Q9QXN0-2;A0A286YDQ8;E9QMY5;Q9QXN0-3;Q9QXN0;E9Q6I3	713;713;713;807;888;888;888;888	A0A0R4J1H8	A0A0R4J1H8	Protein Shroom3	Shroom3		0.978711	17.8737	2.04998e-13	98.592	84.24	85.837	0.484346	0	0.0018961	51.546	0	0		NaN	0.777519	7.66798	5.28652e-05	68.069	0.879284	9.61269	4.90788e-06	83.499									0.978711	17.8737	2.62395e-06	85.837	0.835875	7.39154	3.83214e-05	75.669
A0A0R4J1H8;Q9QXN0-4;Q9QXN0-2;A0A286YDQ8;E9QMY5;Q9QXN0-3;Q9QXN0;E9Q6I3;G3UXH3	67;67;67;161;242;242;242;242;67	A0A0R4J1H8	A0A0R4J1H8	Protein Shroom3	Shroom3		0.401055	0	9.47579e-05	57.804	54.713	57.804	0	0		NaN					0	0		NaN	0.401055	0	9.47579e-05	57.804	0	0		NaN									0	0		NaN	0	0		NaN	0
A0A0R4J1H8;Q9QXN0-4;Q9QXN0-2;A0A286YDQ8;E9QMY5;Q9QXN0-3;Q9QXN0;E9Q6I3	264;264;264;358;439;439;439;439	A0A0R4J1H8	A0A0R4J1H8	Protein Shroom3	Shroom3		0.998208	27.4584	2.52e-20	71.297	60.949	68.942	0.96113	13.9137	1.25417e-10	60.79	0.939977	12.1886	3.3063e-05	40.094	0.903641	9.62538	5.93666e-09	57.347	0.898598	9.38082	4.88628e-11	59.873	0.988962	19.5143	2.52e-20	71.297	0.997086	25.3452	1.60824e-16	65.801	0.988892	19.9299	2.41288e-05	45.511	0.995249	23.2138	1.41822e-16	66.282	0.984884	18.1264	4.09978e-11	60.481	0.998208
A0A0R4J1H8;Q9QXN0-4;Q9QXN0-2;A0A286YDQ8;E9QMY5;Q9QXN0-3;Q9QXN0;E9Q6I3	268;268;268;362;443;443;443;443	A0A0R4J1H8	A0A0R4J1H8	Protein Shroom3	Shroom3		0.999734	35.7727	2.52e-20	71.297	60.949	66.282	0.984752	18.0157	1.25417e-10	60.79	0.99307	24.0879	3.3063e-05	40.094	0.97725	15.9382	5.93666e-09	57.347	0.980595	16.5629	4.88628e-11	59.873	0.997888	26.697	2.52e-20	71.297	0.999478	32.8388	1.60824e-16	65.801	0.994627	23.5143	2.41288e-05	45.511	0.999734	35.7727	1.41822e-16	66.282	0.996598	24.6058	4.09978e-11	60.481	0.999253
A0A0R4J1H8;Q9QXN0-4;Q9QXN0-2;A0A286YDQ8;E9QMY5;Q9QXN0-3;Q9QXN0	764;764;764;858;939;939;939	A0A0R4J1H8	A0A0R4J1H8	Protein Shroom3	Shroom3		0.571451	1.24978	0.00346573	76.17	29.088	76.17	0	0		NaN	0	0		NaN					0	0		NaN	0	0		NaN					0	0		NaN	0.5	0	0.0354353	71.614	0	0		NaN	0.571451
Q05BG1;E9QA19;A0A0R4J1K1;Q8BT14-2;Q8BT14;Q8BT14-3	429;432;429;429;432;432	Q05BG1	Q05BG1	CCR4-NOT transcription complex subunit 4	Cnot4		0.742138	6.25721	3.35953e-39	83.022	69.656	83.022													0.588032	5.32791	1.89247e-07	49.944	0	0		NaN	0.630472	6.7052	7.00359e-14	59.971	0.683931	6.78772	4.83385e-14	61.112	0.742138	6.25721	3.35953e-39	83.022
Q05BG1;E9QA19;A0A0R4J1K1;Q8BT14-2;Q8BT14;Q8BT14-3	321;324;321;321;324;324	Q05BG1	Q05BG1	CCR4-NOT transcription complex subunit 4	Cnot4		0.999036	34.2333	1.92817e-07	53.342	43.755	40.962	0	0		NaN	0	0		NaN	0.999036	34.2333	1.92817e-07	53.342					0	0		NaN	0	0		NaN					0	0		NaN	0	0		NaN
D3YTV4;A0A286YDF9;Q5RJ53;A0A286YD32;A0A0R4J1L3;Q91VW9	223;194;223;56;223;223	D3YTV4	D3YTV4	Zinc finger protein with KRAB and SCAN domains 3	Zkscan3		1	57.1747	1.59761e-05	80.979	64.203	57.175	1	77.5932	2.65999e-05	77.593	1	57.1747	0.000917399	57.175	1	59.5697	0.000721166	59.57	1	66.2667	0.000336109	66.267	1	76.5225	2.99593e-05	76.522	1	56.2251	0.00116055	56.225	1	80.9793	1.59761e-05	80.979	1	77.5932	2.65999e-05	77.593	1	78.692	2.31525e-05	78.692	0
A0A0R4J1L6;Q5DTU0;Q5DTU0-2	428;484;502	A0A0R4J1L6	A0A0R4J1L6	Actin filament-associated protein 1-like 2	Afap1l2		0.999134	30.8766	1.02946e-05	75.764	60.008	75.316									0.98921	21.4483	0.0021207	48.177	0.96196	16.7981	0.00424504	41.052	0.998269	29.0179	1.02946e-05	75.764									0.968157	17.6284	0.00413093	41.378	0.862795	10.7793	0.00314523	44.188
A0A0R4J1L9;Q5HZI1;E9Q8N4	532;532;532	A0A0R4J1L9	A0A0R4J1L9	Microtubule-associated tumor suppressor 1 homolog	Mtus1		0.461318	0	2.17051e-09	72.184	65.581	72.184	0.461318	0	2.17051e-09	72.184	0.311756	0	1.62259e-05	48.547	0.44454	0	6.77642e-08	65.107	0.34474	0	0.000118929	42.568	0.309602	0	0.000173111	40.962	0.418064	0	1.62259e-05	48.547	0.424331	0	8.09108e-07	51.643
A0A0R4J1L9;Q5HZI1;E9Q8N4	533;533;533	A0A0R4J1L9	A0A0R4J1L9	Microtubule-associated tumor suppressor 1 homolog	Mtus1		0.461318	0	2.17051e-09	72.184	65.581	72.184	0.461318	0	2.17051e-09	72.184	0.311756	0	1.62259e-05	48.547	0.44454	0	6.77642e-08	65.107	0.34474	0	0.000118929	42.568	0.309602	0	0.000173111	40.962	0.418064	0	1.62259e-05	48.547	0.424331	0	8.09108e-07	51.643	0.294437	0	2.077e-05	47.754
A0A0R4J1L9;Q5HZI1;E9Q8N4	535;535;535	A0A0R4J1L9	A0A0R4J1L9	Microtubule-associated tumor suppressor 1 homolog	Mtus1		0.311756	0	1.62259e-05	48.547	37.441	48.547					0.311756	0	1.62259e-05	48.547									0.309602	0	0.000173111	40.962									0.294437	0	2.077e-05	47.754
A0A0R4J1L9;Q5HZI1;A0A0R4J0N9;A0A0R4J147;Q5HZI1-3;Q5HZI1-2;Q5HZI1-4	1199;1199;429;509;396;429;509	A0A0R4J1L9	A0A0R4J1L9	Microtubule-associated tumor suppressor 1 homolog	Mtus1		0.991458	20.6475	9.07761e-27	89.992	73.794	89.992					0.970705	15.2184	3.3853e-05	73.022	0.991458	20.6475	9.07761e-27	89.992	0	0		NaN	0	0		NaN	0.711911	3.92907	2.1808e-06	86.291	0	0		NaN					0	0		NaN
A0A0R4J1L9;Q5HZI1;A0A0R4J0N9;A0A0R4J147;Q5HZI1-3;Q5HZI1-2;Q5HZI1-4	1201;1201;431;511;398;431;511	A0A0R4J1L9	A0A0R4J1L9	Microtubule-associated tumor suppressor 1 homolog	Mtus1		0.999954	43.9064	4.02149e-22	118.37	96.903	118.37	0.999199	31.1534	2.00865e-06	86.467	0.992577	22.5033	3.68015e-05	74.769	0.996956	26.0489	4.62467e-13	95.651	0.998984	31.2621	7.32137e-09	91.812	0.999027	30.8368	1.07641e-08	90.444	0.998933	31.1534	2.00865e-06	86.467	0.998834	31.6606	4.26575e-10	94.551	0.999224	31.7117	3.43855e-14	100.54	0.999626	34.38	1.59217e-17	105	0.999477
A0A0R4J1L9;Q5HZI1;A0A0R4J0N9;A0A0R4J147;Q5HZI1-3;Q5HZI1-2;Q5HZI1-4	1204;1204;434;514;401;434;514	A0A0R4J1L9	A0A0R4J1L9	Microtubule-associated tumor suppressor 1 homolog	Mtus1		0.515064	1.48838	0.000781	53.754	41.127	53.754									0	0		NaN	0	0		NaN	0	0		NaN	0	0		NaN	0	0		NaN					0	0		NaN	0.515064
A0A0R4J1L9;Q5HZI1;A0A0R4J0N9;A0A0R4J147;Q5HZI1-3;Q5HZI1-2;Q5HZI1-4	1208;1208;438;518;405;438;518	A0A0R4J1L9	A0A0R4J1L9	Microtubule-associated tumor suppressor 1 homolog	Mtus1		0.988374	19.5368	9.15357e-28	130.95	120.31	103.83	0.910717	10.4757	1.75177e-21	114.31	0.794583	5.98987	5.69803e-09	92.457	0.969202	15.0438	9.15357e-28	130.95	0.79482	5.9855	1.84402e-18	108.71	0.865	8.17587	3.01825e-17	102.73	0	0		NaN	0	0		NaN	0.789504	6.07828	1.50793e-08	88.73	0.746271	4.85334	1.74301e-13	98.943	0.809505
A0A0R4J1L9;Q5HZI1;A0A0R4J0N9;A0A0R4J147;Q5HZI1-3;Q5HZI1-2;Q5HZI1-4	1143;1143;373;453;340;373;453	A0A0R4J1L9	A0A0R4J1L9	Microtubule-associated tumor suppressor 1 homolog	Mtus1		0.992661	21.3119	5.7539e-59	144.18	118.14	131.86	0.5	0	1.63899e-10	86.756	0.5	0	9.46775e-14	91.313	0.944667	12.323	5.7539e-59	144.18	0.823115	6.6777	2.67843e-45	123.76	0.5	0	1.2977e-13	90.05	0.799195	5.99878	4.38184e-35	110.55	0.499999	0	1.47743e-13	89.403	0.992661	21.3119	1.9916e-49	131.86	0.903712	9.72457	1.0747e-13	90.853	0.800575
A0A0R4J1L9;Q5HZI1;A0A0R4J0N9;A0A0R4J147;Q5HZI1-3;Q5HZI1-2;Q5HZI1-4	1164;1164;394;474;361;394;474	A0A0R4J1L9	A0A0R4J1L9	Microtubule-associated tumor suppressor 1 homolog	Mtus1		1	43.6798	0.000254313	68.809	41.4	43.68	1	42.8094	0.0141803	42.809					1	66.3926	0.000473207	66.393	1	67.4565	0.000376844	67.456	1	60.1571	0.0013873	60.157	1	48.7942	0.00637047	48.794	1	43.6798	0.0123966	43.68					1	42.8094	0.0141803	42.809	1
A0A0R4J1L9;Q5HZI1;A0A0R4J0N9;A0A0R4J147;Q5HZI1-3;Q5HZI1-2;Q5HZI1-4	1185;1185;415;495;382;415;495	A0A0R4J1L9	A0A0R4J1L9	Microtubule-associated tumor suppressor 1 homolog	Mtus1		0.696064	8.36999	0.000104281	56.482	49.111	56.482	0.675696	7.95951	0.000473879	46.964	0.467543	4.20715	0.000860572	41.378	0.574264	5.41705	0.000943241	40.237					0.696064	8.36999	0.000104281	56.482	0.675696	7.95951	0.000473879	46.964	0	0		NaN	0.607948	6.67719	0.000774277	42.568	0.669414	7.8357	0.000543371	45.864	0
A0A0R4J1L9;Q5HZI1;A0A0R4J0N9;A0A0R4J147;Q5HZI1-3;Q5HZI1-2;Q5HZI1-4;D3Z2H5;D3Z7B3	894;894;124;204;124;124;204;23;30	A0A0R4J1L9	A0A0R4J1L9	Microtubule-associated tumor suppressor 1 homolog	Mtus1		0.999992	51.3749	1.19479e-10	119.39	75.077	111.63	0.999992	51.3749	1.00861e-07	111.63	0.999941	42.3238	1.19479e-10	119.39	0.999818	38.6341	0.000146567	76.655	0.999859	38.5236	7.1017e-07	100.93	0.999971	45.4391	3.15409e-07	107.85	0.999929	41.6169	6.7549e-07	99.215	0.999659	34.7427	7.62332e-05	79.82	0.999838	39.1303	1.18747e-05	85.288	0.999928	41.4432	5.40166e-07	103.91	0.999931
K3W4N7;A0A0R4J1M7;Q9JJV9-2;Q9JJV9	510;510;510;510	K3W4N7	K3W4N7	Sodium channel protein;Sodium channel protein type 5 subunit alpha	Scn5a		0.980701	17.1883	1.89604e-09	92.38	64.291	78.285	0.841108	7.34158	3.61368e-05	63.681	0.862189	8.11431	0.000108297	59.261	0.97023	15.158	1.89604e-09	92.38	0.966972	14.9461	0.000104161	59.513	0.893875	9.357	4.47642e-05	63.134	0.979368	16.9056	9.78055e-06	69.729	0.866829	8.28511	0.000388817	50.608	0.844143	7.45165	2.1825e-05	66.965	0.980701	17.1883	8.79579e-06	78.285	0.806313
K3W4N7;A0A0R4J1M7;Q9JJV9-2;Q9JJV9	516;516;516;516	K3W4N7	K3W4N7	Sodium channel protein;Sodium channel protein type 5 subunit alpha	Scn5a		0.988228	19.7452	1.00303e-05	77.562	59.459	54.7	0.988228	19.7452	0.000222327	54.7	0.988228	19.7452	0.000222327	54.7	0.965206	14.5245	1.00303e-05	77.562	0.977893	16.7053	3.66169e-05	63.631	0.987326	19.5006	0.00025065	53.777	0.98511	19.6337	6.92608e-05	61.641	0.867548	8.74734	0.00121642	43.024	0.947843	13.0584	1.32014e-05	68.944	0.976347	16.2902	7.81806e-05	61.097	0.808035
K3W4N7;A0A0R4J1M7;Q9JJV9-2;Q9JJV9	664;664;664;664	K3W4N7	K3W4N7	Sodium channel protein;Sodium channel protein type 5 subunit alpha	Scn5a		1	78.3021	7.17059e-97	145.58	132.16	145.58	0.884076	12.3867	2.05624e-05	48.867	0.968373	19.5224	2.04389e-08	67.274	0.996363	28.2485	4.93986e-08	58.015					0	0		NaN	0.975392	19.77	3.02907e-08	65.901					0.778864	6.2642	7.28326e-05	43.888					0.999427
K3W4N7;A0A0R4J1M7;Q9JJV9-2;Q9JJV9	667;667;667;667	K3W4N7	K3W4N7	Sodium channel protein;Sodium channel protein type 5 subunit alpha	Scn5a		0.999881	39.7846	7.17059e-97	145.58	132.16	145.58	0.746336	7.77994	2.05624e-05	48.867	0.965501	18.7853	2.04389e-08	67.274	0.810299	9.14736	4.93986e-08	58.015					0	0		NaN	0.794254	8.75484	3.02907e-08	65.901					0.459146	1.0821	7.28326e-05	43.888					0.972645
K3W4N7;A0A0R4J1M7;Q9JJV9-2;Q9JJV9	1989;1989;1988;1988	K3W4N7	K3W4N7	Sodium channel protein;Sodium channel protein type 5 subunit alpha	Scn5a		0.898063	9.44973	0.0111687	43.246	32.373	43.246	0	0		NaN									0	0		NaN									0.898063	9.44973	0.0111687	43.246
K3W4N7;A0A0R4J1M7;Q9JJV9-2;Q9JJV9	528;528;528;528	K3W4N7	K3W4N7	Sodium channel protein;Sodium channel protein type 5 subunit alpha	Scn5a		0.999981	47.207	0.0255628	66.994	31.888	66.994	0	0		NaN	0	0		NaN	0	0		NaN	0	0		NaN	0	0		NaN	0	0		NaN	0	0		NaN	0.999896	39.8227	0.0301376	59.609					0
K3W4N7;A0A0R4J1M7;Q9JJV9-2;Q9JJV9	457;457;457;457	K3W4N7	K3W4N7	Sodium channel protein;Sodium channel protein type 5 subunit alpha	Scn5a		0.490769	0	5.80697e-06	50.531	46.937	50.531	0.490769	0	5.80697e-06	50.531
K3W4N7;A0A0R4J1M7;Q9JJV9-2;Q9JJV9	459;459;459;459	K3W4N7	K3W4N7	Sodium channel protein;Sodium channel protein type 5 subunit alpha	Scn5a		0.499998	0	9.99047e-11	85.77	70.23	85.77	0.499989	0	5.80697e-06	74.678	0.499882	0	0.000123439	57.136	0.499984	0	9.38527e-06	73.91	0.499998	0	9.99047e-11	85.77	0.499998	0	1.31649e-05	73.022					0	0		NaN	0.499997	0	1.3675e-10	84.759	0	0		NaN	0.499998
K3W4N7;A0A0R4J1M7;Q9JJV9-2;Q9JJV9	460;460;460;460	K3W4N7	K3W4N7	Sodium channel protein;Sodium channel protein type 5 subunit alpha	Scn5a		0.499998	0	9.99047e-11	85.77	70.23	85.77	0.499989	0	5.80697e-06	74.678	0.499882	0	0.000123439	57.136	0.499984	0	9.38527e-06	73.91	0.499998	0	9.99047e-11	85.77	0.499998	0	1.31649e-05	73.022					0	0		NaN	0.499997	0	1.3675e-10	84.759	0	0		NaN	0.499998
K3W4N7;A0A0R4J1M7;Q9JJV9-2;Q9JJV9	483;483;483;483	K3W4N7	K3W4N7	Sodium channel protein;Sodium channel protein type 5 subunit alpha	Scn5a		0.468133	0	0.000506646	43.696	38.982	43.696													0.468133	0	0.000506646	43.696																					0
K3W4N7;A0A0R4J1M7;Q9JJV9-2;Q9JJV9	484;484;484;484	K3W4N7	K3W4N7	Sodium channel protein;Sodium channel protein type 5 subunit alpha	Scn5a		0.468133	0	0.000506646	43.696	38.982	43.696													0.468133	0	0.000506646	43.696																					0
K3W4N7;A0A0R4J1M7;Q9JJV9-2;Q9JJV9	571;571;571;571	K3W4N7	K3W4N7	Sodium channel protein;Sodium channel protein type 5 subunit alpha	Scn5a		0.839614	7.19527	3.90385e-13	66.886	66.886	66.886					0.496128	0	0.0178833	41.521																	0.499713	0	0.00342169	48.616
D6RE33;A0A0R4J1Q0;G5E896;Q3UJB9-2;Q3UJB9	818;864;880;864;880	D6RE33	D6RE33	Enhancer of mRNA-decapping protein 4	Edc4		0.528074	1.01034	8.1109e-59	91.079	81.109	69.952	0.478515	0	8.1109e-59	91.079	0.494917	0.927864	6.85908e-43	78.45	0.452312	0	1.66447e-25	69.356					0.335493	0	3.97968e-20	63.625					0.454109	0	1.02265e-32	70.213	0.441625	0	1.86151e-24	64.16
D6RE33;A0A0R4J1Q0;G5E896;Q3UJB9-2;Q3UJB9	822;868;884;868;884	D6RE33	D6RE33	Enhancer of mRNA-decapping protein 4	Edc4		0.938229	12.9513	8.1109e-59	91.079	86.981	91.079	0.478515	0	8.1109e-59	91.079					0.452312	0	1.66447e-25	69.356	0.672895	3.88354	1.58432e-43	81.406	0.335493	0	3.97968e-20	63.625	0.938229	12.9513	8.1109e-59	91.079	0.454109	0	1.02265e-32	70.213	0.441625	0	1.86151e-24	64.16	0.486045	0.771537	4.90418e-33	73.266	0.539715
D6RE33;A0A0R4J1Q0;G5E896;Q3UJB9-2;Q3UJB9;F6ZJ27	673;733;733;733;733;314	D6RE33	D6RE33	Enhancer of mRNA-decapping protein 4	Edc4		0.491118	0	9.42092e-33	80.984	77.428	80.984													0	0		NaN													0.491118	0	9.42092e-33	80.984
A0A0R4J1R7;Q9CZL5	2;35	A0A0R4J1R7	A0A0R4J1R7	Pterin-4-alpha-carbinolamine dehydratase 2	Pcbd2		0.499963	0	0.0316846	41.577	26.006	41.577									0.499963	0	0.0316846	41.577					0	0		NaN									0	0		NaN	0	0		NaN
A0A0R4J1R7;Q9CZL5	3;36	A0A0R4J1R7	A0A0R4J1R7	Pterin-4-alpha-carbinolamine dehydratase 2	Pcbd2		0.499963	0	0.0316846	41.577	26.006	41.577									0.499963	0	0.0316846	41.577					0	0		NaN									0	0		NaN	0	0		NaN
F6XW22;E9QMI6;D3Z4N6;E9QP07;A0A0R4J1S2;Q80W14;Q80W14-3	218;830;818;831;834;831;834	F6XW22	F6XW22	Pre-mRNA-processing factor 40 homolog B	Prpf40b		1	45.6801	4.89102e-05	66.826	50.333	45.68	0	0		NaN	1	41.8708	0.00169611	41.871	0	0		NaN	1	41.0881	0.00181278	41.088	0	0		NaN	0	0		NaN	1	45.6801	0.0614628	45.68	0	0		NaN	0	0		NaN	1
V9GWS1;A0A0R4J1S9;V9GWS0;Q5SWU9;Q5SWU9-2;V9GWR9	23;61;23;23;61;23	V9GWS1	V9GWS1	Acetyl-CoA carboxylase 1;Biotin carboxylase	Acaca		0.332894	0	1.05513e-05	45.704	39.268	45.704					0	0		NaN					0	0		NaN	0	0		NaN					0	0		NaN	0	0		NaN	0	0		NaN	0.332894
V9GWS1;A0A0R4J1S9;V9GWS0;Q5SWU9;Q5SWU9-2;V9GWR9	25;63;25;25;63;25	V9GWS1	V9GWS1	Acetyl-CoA carboxylase 1;Biotin carboxylase	Acaca		0.928346	11.1173	4.81576e-18	85.636	67.935	85.636					0	0		NaN					0	0		NaN	0	0		NaN					0	0		NaN	0	0		NaN	0	0		NaN	0.928346
V9GWS1;A0A0R4J1S9;V9GWS0;Q5SWU9;Q5SWU9-2;V9GWR9	29;67;29;29;67;29	V9GWS1	V9GWS1	Acetyl-CoA carboxylase 1;Biotin carboxylase	Acaca		0.984608	19.1383	4.81576e-18	85.636	67.935	85.636					0	0		NaN					0	0		NaN	0	0		NaN					0	0		NaN	0	0		NaN	0	0		NaN	0.984608
V9GWS1;A0A0R4J1S9;V9GWS0;Q5SWU9;Q5SWU9-2	79;117;79;79;117	V9GWS1	V9GWS1	Acetyl-CoA carboxylase 1;Biotin carboxylase	Acaca		0.988827	22.3985	0.00133452	56.359	38.324	56.359					0.748346	7.74329	0.00690798	41.54	0	0		NaN					0	0		NaN	0.988827	22.3985	0.00133452	56.359	0.935753	14.6434	0.00417855	48.44									0.947395
A0A0R4J1T2;D6RHT6;D6RDD2;D6RD03;D6RFU5;G5E8T2;O88196-5;O88196-4;O88196-3;O88196-6;O88196-2;O88196	659;1041;1042;1059;1079;1060;659;1041;1042;1060;1059;1060	A0A0R4J1T2	A0A0R4J1T2	E3 ubiquitin-protein ligase TTC3	Ttc3		0.5	0	3.35947e-08	77.222	65.077	48.823	0.5	0	2.78465e-05	65.47	0.5	0	9.86134e-05	48.823	0	0		NaN	0.5	0	6.14331e-05	51.695					0.5	0	0.000251229	42.338	0.5	0	6.48719e-05	51.147									0
A0A0R4J1T2;D6RHT6;D6RDD2;D6RD03;D6RFU5;G5E8T2;O88196-5;O88196-4;O88196-3;O88196-6;O88196-2;O88196	661;1043;1044;1061;1081;1062;661;1043;1044;1062;1061;1062	A0A0R4J1T2	A0A0R4J1T2	E3 ubiquitin-protein ligase TTC3	Ttc3		0.5	0	3.35947e-08	77.222	65.077	48.823	0.5	0	2.78465e-05	65.47	0.5	0	9.86134e-05	48.823	0	0		NaN	0.5	0	6.14331e-05	51.695					0.5	0	0.000251229	42.338	0.5	0	6.48719e-05	51.147									0
F6RXB5;A0A0R4J1T3;Q8BYC6	197;356;356	F6RXB5	F6RXB5	Serine/threonine-protein kinase TAO3	Taok3		0.396726	1.10525	7.09786e-06	47.745	33.873	47.237									0.352334	1.82026	8.79223e-06	46.862					0.396726	1.10525	8.0731e-06	47.237	0	0		NaN									0	0		NaN	0.330959
F6RXB5;A0A0R4J1T3;Q8BYC6	200;359;359	F6RXB5	F6RXB5	Serine/threonine-protein kinase TAO3	Taok3		0.711147	7.07838	1.01171e-12	66.613	53.021	60.943									0	0		NaN	0.60825	4.94562	2.53113e-07	53.705	0	0		NaN	0	0		NaN					0.38462	2.67097	1.3232e-05	43.099	0.433512	1.39989	1.01171e-12	66.613	0
F6RXB5;A0A0R4J1T3;Q8BYC6;Q5F2E8	65;168;168;172	F6RXB5;Q5F2E8	Q5F2E8	Serine/threonine-protein kinase TAO3;Serine/threonine-protein kinase TAO1	Taok3;Taok1		0.192608	0.408403	8.76836e-12	43.271	38.51	43.271	0	0		NaN																	0.192608	0.408403	8.76836e-12	43.271									0	0		NaN	0
F6RXB5;A0A0R4J1T3;Q8BYC6;Q5F2E8	70;173;173;177	F6RXB5;Q5F2E8	Q5F2E8	Serine/threonine-protein kinase TAO3;Serine/threonine-protein kinase TAO1	Taok3;Taok1		0.244633	0.290427	5.37674e-16	50.057	45.864	50.057	0	0		NaN					0.244633	0.290427	5.37674e-16	50.057																					0	0		NaN	0
F6RXB5;A0A0R4J1T3;Q8BYC6;Q5F2E8	74;177;177;181	F6RXB5;Q5F2E8	Q5F2E8	Serine/threonine-protein kinase TAO3;Serine/threonine-protein kinase TAO1	Taok3;Taok1		0.318125	1.21069	3.07584e-21	51.268	47.034	51.268	0.292345	0	1.50933e-11	42.015													0.318125	1.21069	3.07584e-21	51.268													0	0		NaN	0
A0A0R4J1W7;Q8BGZ4-2;Q8BGZ4	588;470;588	A0A0R4J1W7	A0A0R4J1W7	Cell division cycle protein 23 homolog	Cdc23		0.992442	24.2843	7.27255e-08	91.584	72.313	45.915	0	0		NaN					0.992442	24.2843	0.00887898	45.915	0	0		NaN					0	0		NaN	0.988611	22.7617	0.0117584	43.991	0.991328	23.5912	7.27255e-08	91.584					0.96935
A0A0R4J1Y6;E9PUC4;Q6NSW3-4;Q6NSW3-2;Q6NSW3;Q6NSW3-3	699;986;1011;986;986;1011	A0A0R4J1Y6	A0A0R4J1Y6	A-kinase anchor protein SPHKAP	Sphkap		1	68.4215	0.0388586	68.422	7.6337	68.422													1	68.4215	0.0388586	68.422
A0A0R4J1Y6;E9PUC4;Q6NSW3-4;Q6NSW3-2;Q6NSW3;Q6NSW3-3	913;1200;1225;1200;1200;1225	A0A0R4J1Y6	A0A0R4J1Y6	A-kinase anchor protein SPHKAP	Sphkap		0.338181	0	0.000226258	43.024	33.494	43.024																					0.338181	0	0.000226258	43.024	0	0		NaN
F6TWX0;F7DFJ2;A0A0R4J1Y8;E0CYF3;Q9DBV7;P23708-2;P23708	187;190;291;320;326;297;325	F6TWX0	F6TWX0	Nuclear transcription factor Y subunit alpha	Nfya		1	70.7066	1.19873e-20	73.805	62.155	73.805	0.999982	47.5388	1.21161e-06	51.029	0.999998	57.697	2.39829e-16	63.803	0.99999	50.1106	7.57622e-08	56.247	1	63.123	1.74342e-20	72.771	0.999997	54.8282	2.52034e-11	61.703					0.999999	61.8162	2.39861e-20	71.527	0.999998	56.3523	1.34629e-11	62.611	0.999648	34.53	3.10151e-05	41.562	0.999949
F6SRP4;A0A0R4J1Z1;E9Q6Q2;E0CZE3;E9QMI9;E9QJQ9;E0CYT1;E9QMI8;E9QM73;Q3UH66-6;Q3UH66-2;Q3UH66-7;Q3UH66-4;Q3UH66-3;Q3UH66;Q3UH66-5	292;938;1687;1797;1698;1797;1785;1797;1797;1687;1797;1698;1797;1797;1797;1797	F6SRP4	F6SRP4	Serine/threonine-protein kinase WNK2	Wnk2		0.999968	46.1904	0.000743556	59.198	38.421	59.198	0.999844	40.9355	0.00228307	51.841	0.999689	36.8618	0.00663587	42.809	0.999766	37.8843	0.00593373	43.544	0.999804	38.64	0.00521116	44.299	0.998941	31.2756	0.00733003	42.083	0.999727	37.3255	0.00663587	42.809	0.999319	32.0347	0.00251212	51.013	0.99943	33.6893	0.00521116	44.299					0.999968
F6SRP4;A0A0R4J1Z1;E9Q6Q2;E0CZE3;E9QMI9;E9QJQ9;E0CYT1;E9QMI8;E9QM73;Q3UH66-6;Q3UH66-2;Q3UH66-7;Q3UH66-4;Q3UH66-3;Q3UH66;Q3UH66-5	264;910;1659;1769;1670;1769;1757;1769;1769;1659;1769;1670;1769;1769;1769;1769	F6SRP4	F6SRP4	Serine/threonine-protein kinase WNK2	Wnk2		0.572813	1.27759	0.000145824	55.841	38.622	48.823					0	0		NaN	0.571027	1.2429	0.000145824	55.841																					0.572813	1.27759	0.000349111	48.823
F6SRP4;A0A0R4J1Z1;E9Q6Q2;E0CZE3;E9QMI9;E9QJQ9;E0CYT1;E9QMI8;E9QM73;Q3UH66-6;Q3UH66-2;Q3UH66-7;Q3UH66-4;Q3UH66-3;Q3UH66;Q3UH66-5	265;911;1660;1770;1671;1770;1758;1770;1770;1660;1770;1671;1770;1770;1770;1770	F6SRP4	F6SRP4	Serine/threonine-protein kinase WNK2	Wnk2		0.981962	17.3593	2.63147e-19	95.428	77.064	95.428					0	0		NaN					0.644448	2.58513	0.000127851	63.682	0.981962	17.3593	2.63147e-19	95.428	0.833823	7.00877	0.000157141	55.186					0.78862	5.71824	4.20359e-08	80.507					0.873957
A0A0R4J212;O35177	295;295	A0A0R4J212	A0A0R4J212	Enhancer of filamentation 1	Nedd9		0.457953	0	1.24273e-05	41.214	30.311	41.214					0.457953	0	1.24273e-05	41.214																					0	0		NaN
A0A0R4J212;O35177	297;297	A0A0R4J212	A0A0R4J212	Enhancer of filamentation 1	Nedd9		0.457953	0	1.24273e-05	41.214	30.311	41.214					0.457953	0	1.24273e-05	41.214																					0	0		NaN
A0A0R4J233;A0A1W2P6J7;Q8C650-2;Q8C650;A0A1W2P866	411;411;411;411;184	A0A0R4J233	A0A0R4J233	Septin-10	2010-09-01		0.582262	4.45254	7.57717e-52	110.9	98.468	110.9																													0.332948	0	2.27477e-06	50.029	0	0		NaN
A0A0R4J233;A0A1W2P6J7;Q8C650-2;Q8C650;A0A1W2P866	413;413;413;413;186	A0A0R4J233	A0A0R4J233	Septin-10	2010-09-01		0.45454	0	4.49269e-34	100.08	90.552	100.08																													0.332948	0	2.27477e-06	50.029	0	0		NaN	0.45454
A0A0R4J233;A0A1W2P6J7;Q8C650-2;Q8C650;A0A1W2P866	414;414;414;414;187	A0A0R4J233	A0A0R4J233	Septin-10	2010-09-01		0.45454	0	4.49269e-34	100.08	90.552	100.08																													0.332948	0	2.27477e-06	50.029	0	0		NaN	0.45454
A0A0R4J243;Q8BR65	234;234	A0A0R4J243	A0A0R4J243	Sin3 histone deacetylase corepressor complex component SDS3	Suds3		0.982191	14.6227	6.71295e-13	67.33	63.889	67.33	0.982191	14.6227	6.71295e-13	67.33					0.756062	2.13305	1.70073e-05	46.862	0.868566	5.41196	2.22247e-10	57.803	0.768522	2.43658	1.34499e-05	47.806	0.978134	13.6918	3.57283e-07	53.475	0	0		NaN	0.868738	5.41882	2.55501e-07	54.605	0.677308	0.341369	2.37601e-05	45.07	0.930824
A0A0R4J243;Q8BR65	236;236	A0A0R4J243	A0A0R4J243	Sin3 histone deacetylase corepressor complex component SDS3	Suds3		0.670951	0.258823	6.71295e-13	67.33	63.889	45.07	0.53397	0.443802	6.71295e-13	67.33					0.641747	0.463341	1.70073e-05	46.862	0.588285	0.452411	2.22247e-10	57.803	0.636422	0.474819	1.34499e-05	47.806	0.532608	0.385922	3.57283e-07	53.475	0	0		NaN	0.588217	0.452665	2.55501e-07	54.605	0.670951	0.258823	2.37601e-05	45.07	0.551273
A0A0R4J243;Q8BR65	32;32	A0A0R4J243	A0A0R4J243	Sin3 histone deacetylase corepressor complex component SDS3	Suds3		0.995894	26.8693	4.81683e-20	53.365	46.953	53.365	0.974536	18.8634	2.99662e-10	43.16	0.97802	17.7993	1.16117e-10	44.295																	0.967791	17.7993	1.16117e-10	44.295	0.995894	26.8693	4.81683e-20	53.365					0.989063
A0A0R4J250;Q61070	334;316	A0A0R4J250	A0A0R4J250	Etoposide-induced protein 2.4	Ei24		0.236308	1.07267	8.03175e-33	78.311	57.141	43.628	0.182574	0	6.74109e-07	48.685	0	0		NaN	0.236308	1.07267	8.01294e-07	48.204	0.197526	0	8.03175e-33	78.311	0.163235	0	2.66404e-07	50.229	0	0		NaN	0.185457	0	5.93729e-05	40.142	0	0		NaN	0	0		NaN
A0A0R4J250;Q61070	335;317	A0A0R4J250	A0A0R4J250	Etoposide-induced protein 2.4	Ei24		0.235473	0	3.22476e-98	116.34	95.466	116.34	0.182574	0	6.74109e-07	48.685	0	0		NaN	0.188758	0	8.01294e-07	48.204	0.197526	0	8.03175e-33	78.311	0.163235	0	2.66404e-07	50.229	0	0		NaN	0.185457	0	5.93729e-05	40.142	0	0		NaN	0	0		NaN	0.235473
A0A0R4J250;Q61070	336;318	A0A0R4J250	A0A0R4J250	Etoposide-induced protein 2.4	Ei24		0.235473	0	3.22476e-98	116.34	95.466	116.34	0.182574	0	6.74109e-07	48.685	0	0		NaN	0.188758	0	8.01294e-07	48.204	0.197526	0	8.03175e-33	78.311	0.163235	0	2.66404e-07	50.229	0	0		NaN	0.185457	0	5.93729e-05	40.142	0	0		NaN	0	0		NaN	0.235473
A0A0R4J250;Q61070	337;319	A0A0R4J250	A0A0R4J250	Etoposide-induced protein 2.4	Ei24		0.235473	0	3.22476e-98	116.34	95.466	116.34	0.182574	0	6.74109e-07	48.685	0	0		NaN	0.188758	0	8.01294e-07	48.204	0.197526	0	8.03175e-33	78.311	0.163235	0	2.66404e-07	50.229	0	0		NaN	0.185457	0	5.93729e-05	40.142	0	0		NaN	0	0		NaN	0.235473
A0A0R4J250;Q61070	338;320	A0A0R4J250	A0A0R4J250	Etoposide-induced protein 2.4	Ei24		0.300992	2.37051	3.22476e-98	116.34	95.466	56.514	0.182574	0	6.74109e-07	48.685	0	0		NaN	0.188758	0	8.01294e-07	48.204	0.197526	0	8.03175e-33	78.311	0.300992	2.37051	2.66404e-07	56.514	0	0		NaN	0.185457	0	5.93729e-05	40.142	0	0		NaN	0	0		NaN	0.235473
A0A0R4J257;B2RUP2-2;B2RUP2	149;149;149	A0A0R4J257	A0A0R4J257	Protein unc-13 homolog D	Unc13d		0.976333	16.1545	3.80543e-11	96.229	61.537	71.555	0.969371	15.0036	1.81019e-08	93.345	0.8634	8.00762	0.000489666	63.408	0.870652	8.28084	7.33738e-05	73.781	0.97293	15.5559	0.000608658	61.435	0.800515	6.03458	0.000608658	61.435	0.97077	15.2129	3.80543e-11	96.229	0.962945	14.1476	0.000276723	67.385	0.967906	14.7941	5.39851e-08	90.614	0.967404	14.7244	0.00206505	52.693	0.976333
A0A0R4J260;B2RRE7	1015;1016	A0A0R4J260	A0A0R4J260	OTU domain-containing protein 4	Otud4		0.999553	33.4927	0.000274018	57.836	40.81	57.836									0	0		NaN	0	0		NaN	0	0		NaN					0	0		NaN	0	0		NaN	0	0		NaN	0
A0A0R4J260;B2RRE7	1016;1017	A0A0R4J260	A0A0R4J260	OTU domain-containing protein 4	Otud4		0.999553	33.4927	0.000274018	57.836	40.81	57.836									0	0		NaN	0	0		NaN	0	0		NaN					0	0		NaN	0	0		NaN	0	0		NaN	0
A0A0R4J260;B2RRE7	441;442	A0A0R4J260	A0A0R4J260	OTU domain-containing protein 4	Otud4		0.999691	35.4368	0.000393029	61.375	54.01	61.375	0.999691	35.4368	0.000393029	61.375	0	0		NaN	0.995788	24.1032	0.00422749	51.875	0	0		NaN	0.97993	17.244	0.00321597	45.257	0	0		NaN	0.996736	28.3512	0.00442485	43.382	0.995816	24.3122	0.00356488	44.616	0.995912	23.9545	0.000580236	58.487	0.988696
A0A0R4J260;B2RRE7	414;415	A0A0R4J260	A0A0R4J260	OTU domain-containing protein 4	Otud4		0.999923	41.1328	0.0255982	66.692	42.72	66.692	0	0		NaN									0	0		NaN	0	0		NaN	0	0		NaN					0	0		NaN					0
A0A0R4J260;B2RRE7	999;1000	A0A0R4J260	A0A0R4J260	OTU domain-containing protein 4	Otud4		0.986422	18.6132	8.17198e-29	82.417	69.461	67.964	0.986422	18.6132	0.000125349	67.964					0.969907	15.0829	8.17198e-29	82.417	0.957853	13.566	0.000188741	66.056	0.822957	6.7071	0.00140281	41.399					0.982695	17.5427	1.42936e-05	74.678	0.890409	9.09831	0.000172898	66.533	0.714632	3.98729	0.00046896	51.546	0.801072
G3UX82;A0A0R4J288;O70348	242;394;394	G3UX82	G3UX82	Decapping and exoribonuclease protein	Dxo		0.990465	22.1522	6.32408e-12	52.577	42.248	52.577																																					0.990465
A0A0R4J289;P35383	329;329	A0A0R4J289	A0A0R4J289	P2Y purinoceptor 2	P2ry2		0.974034	15.8168	7.97036e-08	82.102	63.999	82.102	0	0		NaN	0.810015	6.55759	0.00954872	41.378	0	0		NaN	0.719074	5.54796	0.00392967	49.988	0	0		NaN	0	0		NaN					0.887928	10.1053	0.00667244	44.925	0.532587	1.92638	0.00215647	55.755	0.974034
A0A0R4J2A0;Q5SW75;Q5SW75-2;Q5SW75-4	1222;1216;1223;1243	A0A0R4J2A0	A0A0R4J2A0	Protein phosphatase Slingshot homolog 2	Ssh2		0.429899	2.29198	8.0487e-08	88.596	75.329	74.944					0	0		NaN																	0.260284	0	0.000197065	61.375					0.425677	0	8.0487e-08	88.596	0
A0A0R4J2A0;Q5SW75;Q5SW75-2;Q5SW75-4	1223;1217;1224;1244	A0A0R4J2A0	A0A0R4J2A0	Protein phosphatase Slingshot homolog 2	Ssh2		0.749769	7.80702	1.86879e-14	114.86	105.21	114.86					0	0		NaN	0.749769	7.80702	1.86879e-14	114.86	0.709	6.88585	5.1728e-11	99.752	0.746152	7.72654	2.2915e-11	105.46					0.260284	0	0.000197065	61.375					0.425677	0	8.0487e-08	88.596	0
A0A0R4J2A0;Q5SW75;Q5SW75-2;Q5SW75-4	1224;1218;1225;1245	A0A0R4J2A0	A0A0R4J2A0	Protein phosphatase Slingshot homolog 2	Ssh2		0.511424	3.24103	4.45886e-11	102.52	86.321	102.52	0.511424	3.24103	4.45886e-11	102.52	0.438393	2.08296	0.000679829	60.255													0.501918	3.05313	4.9906e-11	99.283	0.489464	2.866	6.13843e-08	90.05	0.396038	1.57987	0.00423805	45.879					0
A0A0R4J2B2;Q6WVG3	187;187	A0A0R4J2B2	A0A0R4J2B2	BTB/POZ domain-containing protein KCTD12	Kctd12		0.929563	11.2048	1.21657e-60	108.49	91	108.49	0	0		NaN	0.77758	5.43576	1.93992e-17	76.378	0.870425	8.27212	1.89744e-30	92.307	0.546192	0.804724	5.79302e-50	103.17	0.652594	2.73806	1.10961e-40	100.77									0.929563	11.2048	1.21657e-60	108.49	0.847229	7.4396	2.55192e-30	91.475	0.857274
A0A0R4J2B2;Q6WVG3	189;189	A0A0R4J2B2	A0A0R4J2B2	BTB/POZ domain-containing protein KCTD12	Kctd12		0.948506	13.4412	5.58713e-93	127.78	110.29	42.106	0.532147	0.559935	1.18741e-10	60.472	0.821976	6.68782	4.09288e-07	51.398	0.927512	11.0803	1.48675e-07	55.247	0	0		NaN	0.948506	13.4412	0.000497284	42.106	0.537313	0.649399	9.78212e-18	79.311	0.53253	0.565898	5.58713e-93	127.78	0	0		NaN	0	0		NaN	0.798033
A0A0R4J2B2;Q6WVG3	200;200	A0A0R4J2B2	A0A0R4J2B2	BTB/POZ domain-containing protein KCTD12	Kctd12		0.536438	1.02569	4.19751e-11	63.337	49.674	56.688	0	0		NaN					0	0		NaN	0	0		NaN	0.414776	0	4.19751e-11	63.337					0.427794	0	3.91899e-05	44.426	0	0		NaN	0	0		NaN	0.536438
A0A0R4J2B2;Q6WVG3	202;202	A0A0R4J2B2	A0A0R4J2B2	BTB/POZ domain-containing protein KCTD12	Kctd12		0.427794	0	4.19751e-11	63.337	49.674	44.426	0	0		NaN					0	0		NaN	0	0		NaN	0.414776	0	4.19751e-11	63.337					0.427794	0	3.91899e-05	44.426	0	0		NaN	0	0		NaN
A0A0R4J2C6;A0A0R4J2C1;Q9QXJ1-2;Q9QXJ1;A0A1B0GT76;A0A087WQC5;A0A087WR62;A0A087WPS7;A0A087WPI2	515;517;515;517;37;42;258;292;294	A0A0R4J2C6	A0A0R4J2C6	Amyloid beta A4 precursor protein-binding family B member 1	Apbb1		0.999761	36.2189	6.86552e-13	109	79.698	95.417	0.999761	36.2189	4.5588e-12	95.417	0.998768	29.0869	3.02513e-12	104.17	0.996016	23.9796	1.11953e-06	88.101	0.981299	17.1994	1.43919e-12	94.728	0.996766	24.889	5.0759e-12	99.5	0.987716	19.0531	6.73358e-05	72.29	0.990237	20.0617	8.28726e-05	75.102	0.995308	23.2655	1.142e-06	88.092	0.977421	16.3638	4.86489e-08	88.552	0.999636
A0A0R4J2C6;A0A0R4J2C1;Q9QXJ1-2;Q9QXJ1;A0A1B0GT76;A0A087WQC5;A0A087WR62;A0A087WPS7;A0A087WPI2	697;699;697;699;219;224;440;474;476	A0A0R4J2C6	A0A0R4J2C6	Amyloid beta A4 precursor protein-binding family B member 1	Apbb1		0.999813	37.2797	5.79392e-05	85.288	74.459	65.563	0.99917	30.8054	0.00346542	59.57	0.966204	14.5621	0.0118788	50.207	0.98764	19.026	5.79392e-05	85.288	0.999297	31.5246	0.00235656	62.088	0.997125	25.4008	0.00679507	54.7	0	0		NaN	0	0		NaN	0.982453	17.481	0.0162359	48.044	0	0		NaN	0.999813
A0A0R4J2C6;A0A0R4J2C1;Q9QXJ1-2;Q9QXJ1	205;205;205;205	A0A0R4J2C6	A0A0R4J2C6	Amyloid beta A4 precursor protein-binding family B member 1	Apbb1		0.983734	17.816	0.00109793	70.1	65.245	53.327													0.977319	16.3437	0.00109793	70.1					0.5	0	0.00849186	45.161					0.893657	9.24461	0.00231642	56.432	0.983734	17.816	0.00318693	53.327	0.5
A0A0R4J2C6;A0A0R4J2C1;Q9QXJ1-2;Q9QXJ1	207;207;207;207	A0A0R4J2C6	A0A0R4J2C6	Amyloid beta A4 precursor protein-binding family B member 1	Apbb1		0.567383	1.17772	0.00288145	54.416	49.562	53.756	0.567383	1.17772	0.00306655	53.756					0.562383	1.08938	0.00288145	54.416									0.5	0	0.00849186	45.161													0.5
A0A0U1RNU4;Q8R0T2	83;86	A0A0U1RNU4	A0A0U1RNU4	Zinc finger protein 768	Znf768		0.999988	49.114	6.98506e-09	94.191	79.353	94.191	0.99986	38.5399	9.34482e-06	83.617	0.966829	14.6459	0.00222406	52.071	0.774439	5.35722	0.0055058	43.991	0.999988	49.114	6.98506e-09	94.191	0.865725	8.09383	0.00500901	44.511	0.998277	27.6309	0.000917399	57.175	0.999309	31.6045	0.000189361	69.03	0	0		NaN	0.746862	4.69882	0.00490854	44.616	0.988168
A0A0U1RNU4;Q8R0T2	207;210	A0A0U1RNU4	A0A0U1RNU4	Zinc finger protein 768	Znf768		1	46.7462	4.06881e-08	87.932	77.7	46.746	1	47.5317	0.00155073	47.532	1	46.7462	0.00172636	46.746	1	83.729	3.35202e-07	83.729	1	87.9322	4.06881e-08	87.932	1	48.704	0.00128865	48.704					1	83.729	3.35202e-07	83.729					0	0		NaN	1
A0A0U1RPG9;A0A0U1RNX4;Q3TLD5-2;Q3TLD5	434;441;365;439	A0A0U1RPG9	A0A0U1RPG9	Unconventional prefoldin RPB5 interactor	Uri1		0.948627	13.6321	5.6964e-99	118.55	110.78	118.55													0.948627	13.6321	5.6964e-99	118.55					0.762135	7.49505	8.11458e-28	73.975	0.82101	10.1925	9.95007e-20	65.244									0.501192
A0A0U1RPG9;A0A0U1RNX4;Q3TLD5-2;Q3TLD5	435;442;366;440	A0A0U1RPG9	A0A0U1RPG9	Unconventional prefoldin RPB5 interactor	Uri1		0.542629	0.974411	2.30346e-69	104.48	97.76	94.75	0.505606	0.569153	1.04805e-27	73.361	0.496628	0.517101	9.34152e-10	53.998	0.542629	0.974411	3.09562e-57	94.75					0.447596	0.564689	1.70506e-27	71.656									0.470153	0.569458	3.45054e-48	93.966	0.518858	0.529719	2.30346e-69	104.48
A0A0U1RP03;O54957	49;49	A0A0U1RP03	A0A0U1RP03	Linker for activation of T-cells family member 1	Lat		1	65.4171	1.70248e-05	70.332	65.702	70.332																	1	65.4171	1.70248e-05	70.332													0.999836	37.8405	0.0024835	41.912
A0A0U1RP47;A0A0U1RQ85;P22682;A0A0X1KG61	665;648;665;621	A0A0U1RP47	A0A0U1RP47	E3 ubiquitin-protein ligase CBL	Cbl		0.333076	0	0.000377598	44.196	34.275	44.196	0	0		NaN	0	0		NaN	0	0		NaN	0	0		NaN	0	0		NaN					0.333076	0	0.000377598	44.196	0	0		NaN	0	0		NaN	0
A0A0U1RP47;A0A0U1RQ85;P22682;A0A0X1KG61	666;649;666;622	A0A0U1RP47	A0A0U1RP47	E3 ubiquitin-protein ligase CBL	Cbl		0.333076	0	0.000377598	44.196	34.275	44.196	0	0		NaN	0	0		NaN	0	0		NaN	0	0		NaN	0	0		NaN					0.333076	0	0.000377598	44.196	0	0		NaN	0	0		NaN	0
A0A0U1RP47;A0A0U1RQ85;P22682;A0A0X1KG61	667;650;667;623	A0A0U1RP47	A0A0U1RP47	E3 ubiquitin-protein ligase CBL	Cbl		0.333076	0	0.000377598	44.196	34.275	44.196	0	0		NaN	0	0		NaN	0	0		NaN	0	0		NaN	0	0		NaN					0.333076	0	0.000377598	44.196	0	0		NaN	0	0		NaN	0
A0A0U1RP47;A0A0U1RQ85;P22682	480;463;480	A0A0U1RP47	A0A0U1RP47	E3 ubiquitin-protein ligase CBL	Cbl		0.333015	0	1.9323e-05	46.362	42.972	41.521													0.332969	0	2.8498e-05	41.136	0.332984	0	2.81033e-05	41.521									0.333015	0	2.81033e-05	41.521
A0A0U1RP47;A0A0U1RQ85;P22682	481;464;481	A0A0U1RP47	A0A0U1RP47	E3 ubiquitin-protein ligase CBL	Cbl		0.333015	0	1.9323e-05	46.362	42.972	41.521													0.332969	0	2.8498e-05	41.136	0.332984	0	2.81033e-05	41.521									0.333015	0	2.81033e-05	41.521
A0A0U1RP47;A0A0U1RQ85;P22682	484;467;484	A0A0U1RP47	A0A0U1RP47	E3 ubiquitin-protein ligase CBL	Cbl		0.333015	0	1.9323e-05	46.362	42.972	41.521													0.332969	0	2.8498e-05	41.136	0.332984	0	2.81033e-05	41.521									0.333015	0	2.81033e-05	41.521
A0A0U1RP87;Q9Z2P8	22;41	A0A0U1RP87	A0A0U1RP87	Vesicle-associated membrane protein 5	Vamp5		0.999952	43.863	1.93603e-05	55.656	39.123	55.656	0.999952	43.863	0.00409168	55.656	0.997219	28.8565	1.93603e-05	45.608					0.994227	24.2689	3.46897e-05	43.326	0	0		NaN	0	0		NaN	0	0		NaN					0	0		NaN	0.999803
A0A0U1RP90;Q8K2F8	83;192	A0A0U1RP90	A0A0U1RP90	Protein LSM14 homolog A	Lsm14a		0.941346	12.7148	1.33049e-24	77.053	70.549	40.104	0	0		NaN	0	0		NaN	0.81776	6.51993	1.33049e-24	77.053	0.775125	5.37553	6.73776e-17	66.793													0.649254	2.67596	2.91192e-06	50.055	0.500475	0.0135248	8.36277e-08	55.063
A0A0U1RP90;Q8K2F8	107;216	A0A0U1RP90	A0A0U1RP90	Protein LSM14 homolog A	Lsm14a		0.999996	55.8508	0.000154727	58.831	46.666	58.09	0.999993	53.5635	0.000166468	58.09	0.999787	38.7255	0.00118448	48.625	0.999983	49.6938	0.000321664	53.754	0.999872	41.9231	0.00162654	42.338	0.999906	42.4275	0.000896054	47.568	0.999989	51.1548	0.000238697	55.864	0.999996	55.8508	0.000166468	58.09	0.999902	42.5396	0.00114978	45.614	0.999634	35.2816	0.00176444	54.524	0.999988
A0A0U1RP90;Q8K2F8	73;182	A0A0U1RP90	A0A0U1RP90	Protein LSM14 homolog A	Lsm14a		0.5	0	9.05159e-05	81.865	70.017	48.741	0.5	0	9.05159e-05	81.865	0.5	0	0.0118731	48.741	0.5	0	0.00300007	45.433	0.5	0	0.010841	49.5	0.5	0	0.0163684	45.433	0.5	0	0.00127537	50.284	0.5	0	0.000295739	59.542	0.5	0	0.0012389	49.5	0.5	0	0.00310383	59.542	0.5
A0A0U1RP90;Q8K2F8	74;183	A0A0U1RP90	A0A0U1RP90	Protein LSM14 homolog A	Lsm14a		0.512014	0.243894	2.07979e-07	81.865	70.017	41.021	0.5	0	9.05159e-05	81.865	0.5	0	0.0118731	48.741	0.5	0	0.00300007	45.433	0.512014	0.243894	2.07979e-07	49.5	0.5	0	0.0163684	45.433	0.5	0	0.00127537	50.284	0.5	0	0.000295739	59.542	0.5	0	0.0012389	49.5	0.5	0	0.00310383	59.542	0.5
A0A0U1RPA0;Q3UIL6-3;Q3UIL6-4;Q3UIL6-5;Q3UIL6;Q3UIL6-6;Q3UIL6-2;A0A1L1SQ79	452;428;297;471;533;487;533;533	A0A0U1RPA0	A0A0U1RPA0	Pleckstrin homology domain-containing family A member 7	Plekha7		0.947095	12.529	4.8405e-25	89.049	79.644	83.602					0.499988	0	1.1119e-08	60.034	0.575813	1.32829	5.63538e-06	48.376									0.830263	6.90004	3.7446e-07	51.487					0.865208	8.07457	4.8405e-25	89.049	0.912951	10.2069	1.59382e-14	81.949
A0A0U1RPA0;Q3UIL6-3;Q3UIL6-4;Q3UIL6-5;Q3UIL6;Q3UIL6-6;Q3UIL6-2;A0A1L1SQ79	470;446;315;489;551;505;551;551	A0A0U1RPA0	A0A0U1RPA0	Pleckstrin homology domain-containing family A member 7	Plekha7		0.627206	2.25941	0.00058998	73.435	34.653	73.435	0.627206	2.25941	0.00058998	73.435	0	0		NaN	0	0		NaN	0	0		NaN	0.5	0	0.00121852	61.435	0.618825	2.10443	0.000616894	71.555	0	0		NaN	0.5	0	0.000873049	67.456	0.605765	1.8655	0.00121852	61.435	0.61282
A0A0U1RPA0;Q3UIL6-3;Q3UIL6-4;Q3UIL6-5;Q3UIL6;Q3UIL6-6;Q3UIL6-2;A0A1L1SQ79	472;448;317;491;553;507;553;553	A0A0U1RPA0	A0A0U1RPA0	Pleckstrin homology domain-containing family A member 7	Plekha7		0.990838	20.3403	0.000873049	76.143	50.406	50.108					0.874143	8.41705	0.00642155	76.143	0	0		NaN	0	0		NaN	0.5	0	0.00121852	61.435					0	0		NaN	0.5	0	0.000873049	67.456	0	0		NaN	0
A0A0U1RPA0;Q3UIL6-3;Q3UIL6-4;Q3UIL6-5;Q3UIL6;Q3UIL6-6;Q3UIL6-2;A0A1L1SQ79	520;496;365;539;601;555;601;601	A0A0U1RPA0	A0A0U1RPA0	Pleckstrin homology domain-containing family A member 7	Plekha7		0.999915	40.8824	0.00348653	60.509	20.591	60.509	0.999915	40.8824	0.00827832	60.509	0	0		NaN	0	0		NaN	0	0		NaN	0	0		NaN	0.999257	31.4436	0.00348653	48.115	0	0		NaN	0	0		NaN					0.999688
A0A0U1RPA0;Q3UIL6-3;Q3UIL6-4;Q3UIL6-5;Q3UIL6;Q3UIL6-6;Q3UIL6-2;A0A1L1SQ79	528;504;373;547;609;563;609;609	A0A0U1RPA0	A0A0U1RPA0	Pleckstrin homology domain-containing family A member 7	Plekha7		0.999946	42.649	4.32271e-08	92.856	75.037	92.856	0.995258	23.2198	0.000911521	67.519	0.95109	12.8906	0.00656761	48.568	0	0		NaN	0	0		NaN	0.994655	22.6994	0.00782406	59.116	0.998966	29.8506	1.13797e-05	82.543	0.998092	27.1958	0.000775181	58.674	0	0		NaN	0.998614	28.5766	4.63206e-05	82.543	0.99726
A0A0U1RPA0;Q3UIL6-3;Q3UIL6-4;Q3UIL6-5;Q3UIL6;Q3UIL6-6;Q3UIL6-2	783;759;628;802;864;818;864	A0A0U1RPA0	A0A0U1RPA0	Pleckstrin homology domain-containing family A member 7	Plekha7		0.77011	4.72441	8.09802e-08	44.099	33.952	44.099					0	0		NaN	0	0		NaN	0	0		NaN	0.77011	4.72441	8.09802e-08	44.099									0	0		NaN	0	0		NaN	0
A0A0U1RPA0;Q3UIL6-3;Q3UIL6-4;Q3UIL6-5;Q3UIL6;Q3UIL6-6;Q3UIL6-2	819;795;664;838;900;854;900	A0A0U1RPA0	A0A0U1RPA0	Pleckstrin homology domain-containing family A member 7	Plekha7		1	68.7178	7.30189e-07	94.191	72.891	94.191	0.999994	52.8824	1.44133e-05	84.479	0.998758	30.2192	0.00258107	52.247	0	0		NaN	0.999914	40.0549	0.00395088	49.448	0.999991	49.9372	2.18034e-05	82.543	0.999998	58.5431	1.78102e-05	83.397	0.999993	51.0731	0.000668232	68.44	0.999965	43.9146	0.00111324	59.116	0.999986	49.3824	5.04768e-05	80.979	0.999985
A0A0U1RPA0;Q3UIL6-3;Q3UIL6-4;Q3UIL6-5;Q3UIL6;Q3UIL6-6;Q3UIL6-2	823;799;668;842;904;858;904	A0A0U1RPA0	A0A0U1RPA0	Pleckstrin homology domain-containing family A member 7	Plekha7		0.919442	10.5741	7.30189e-07	94.191	72.891	94.191	0.838668	7.15654	0.00386061	49.632					0	0		NaN	0.868714	8.20616	0.00395088	49.448	0.865434	8.08295	2.18034e-05	82.543	0.881937	8.72406	0.00108988	58.172	0.904548	9.76641	0.000668232	68.44	0.862699	7.98168	0.00111324	59.116					0.887705
A0A0U1RPX0;A0A0U1RPC2;Q9CRA8	19;19;19	A0A0U1RPX0	A0A0U1RPX0	Exosome complex component RRP46	Exosc5		0.229039	0	0.000274329	48.229	35.427	48.229	0	0		NaN	0	0		NaN													0	0		NaN									0	0		NaN
A0A0U1RPX0;A0A0U1RPC2;Q9CRA8	20;20;20	A0A0U1RPX0	A0A0U1RPX0	Exosome complex component RRP46	Exosc5		0.229039	0	0.000274329	48.229	35.427	48.229	0	0		NaN	0	0		NaN													0	0		NaN									0	0		NaN
A0A0U1RPX0;A0A0U1RPC2;Q9CRA8	23;23;23	A0A0U1RPX0	A0A0U1RPX0	Exosome complex component RRP46	Exosc5		0.229039	0	0.000274329	48.229	35.427	48.229	0	0		NaN	0	0		NaN													0	0		NaN									0	0		NaN
A0A0U1RPD5;Q3U1J1-2;Q3U1J1	60;180;180	A0A0U1RPD5	A0A0U1RPD5	TCF3 fusion partner homolog	Tfpt		0.81907	6.63809	2.4143e-13	81.656	57.313	81.656	0	0		NaN	0.496377	0	6.40162e-07	62.891									0	0		NaN	0.498376	0	6.25314e-07	63.76	0	0		NaN									0.81907
A0A0U1RPD8;Q8K284-2;Q8K284	1794;1794;1890	A0A0U1RPD8	A0A0U1RPD8	General transcription factor 3C polypeptide 1	Gtf3c1		1	40.9857	8.70403e-11	46.15	35.443	40.986					1	40.9857	1.98944e-07	40.986					1	46.1504	8.70403e-11	46.15					1	42.2688	1.35578e-07	42.269									0	0		NaN	1
A0A0U1RPI1;Q9Z239	57;82	A0A0U1RPI1	A0A0U1RPI1	Phospholemman	Fxyd1		0.596077	1.9801	1.71936e-18	98.035	81.541	81.632	0.573822	2.2995	4.83567e-07	80.638	0.467416	0	0.000814638	58.487	0.463977	0	2.3786e-09	83.253	0.457872	0	7.33683e-13	89.261	0.492725	0	4.62763e-10	86.641	0.475948	0	7.50479e-07	73.156	0.470747	0	3.20411e-13	90.367	0.333333	0	1.24373e-06	78.021	0.596077	1.9801	1.0682e-07	81.632	0.541511
A0A0U1RPI1;Q9Z239	58;83	A0A0U1RPI1	A0A0U1RPI1	Phospholemman	Fxyd1		0.898178	9.85173	1.71936e-18	98.035	81.541	47.506	0.475948	0	4.83567e-07	80.638	0.467416	0	0.000814638	58.487	0.463977	0	2.3786e-09	83.253	0.799722	6.84512	7.33683e-13	89.261	0.858001	8.43172	4.62763e-10	86.641	0.748368	4.86103	7.47357e-10	85.493	0.470747	0	3.20411e-13	90.367	0.898178	9.85173	1.24373e-06	78.021	0.333333	0	1.47609e-06	77.221	0.626194
Q3TGG2;A0A0U1RPL0;Q7TQH0-3;Q7TQH0;Q7TQH0-2;E9Q5Q0	547;627;627;633;627;513	Q3TGG2	Q3TGG2	Ataxin-2-like protein	Atxn2l		0.333037	0	1.40845e-08	41.608	33.105	41.608									0.333037	0	1.40845e-08	41.608
Q3TGG2;A0A0U1RPL0;Q7TQH0-3;Q7TQH0;Q7TQH0-2;E9Q5Q0	551;631;631;637;631;517	Q3TGG2	Q3TGG2	Ataxin-2-like protein	Atxn2l		0.333037	0	1.40845e-08	41.608	33.105	41.608									0.333037	0	1.40845e-08	41.608
Q3TGG2;A0A0U1RPL0;Q7TQH0-3;Q7TQH0;Q7TQH0-2;E9Q5Q0	506;586;586;592;586;472	Q3TGG2	Q3TGG2	Ataxin-2-like protein	Atxn2l		0.345292	0	0.00105125	56.951	29.303	56.951					0	0		NaN					0	0		NaN	0.345292	0	0.00105125	56.951					0	0		NaN
Q3TGG2;A0A0U1RPL0;Q7TQH0-3;Q7TQH0;Q7TQH0-2;E9Q5Q0	511;591;591;597;591;477	Q3TGG2	Q3TGG2	Ataxin-2-like protein	Atxn2l		0.971092	15.9614	7.44938e-82	150.39	133.72	128.26	0.937891	13.9295	9.63781e-62	127.22	0.927419	11.8657	1.85136e-51	116.06	0.640084	6.54367	0.00969152	46.768	0.870982	12.7359	2.29664e-10	70.235	0	0		NaN	0.963355	14.9248	7.44938e-82	150.39	0.966863	16.8699	2.91462e-62	130.56					0.907571	11.9622	6.15566e-53	119.46	0.947646
Q3TGG2;A0A0U1RPL0;Q7TQH0-3;Q7TQH0;Q7TQH0-2;E9Q5Q0	302;388;388;388;388;268	Q3TGG2	Q3TGG2	Ataxin-2-like protein	Atxn2l		0.499894	0	9.07708e-05	44.567	40.251	43.12	0.499894	0	0.000145806	43.12																					0	0		NaN
Q3TGG2;A0A0U1RPL0;Q7TQH0-3;Q7TQH0;Q7TQH0-2;E9Q5Q0	303;389;389;389;389;269	Q3TGG2	Q3TGG2	Ataxin-2-like protein	Atxn2l		0.499894	0	9.07708e-05	44.567	40.251	43.12	0.499894	0	0.000145806	43.12																					0	0		NaN
Q3TGG2;A0A0U1RPL0;Q7TQH0-3;Q7TQH0;Q7TQH0-2;J3QP59	23;109;109;109;109;52	Q3TGG2	Q3TGG2	Ataxin-2-like protein	Atxn2l		1	66.1033	1.07092e-19	98.694	79.963	96.993	1	66.1033	1.88386e-19	96.993	0.999998	58.1416	1.07092e-19	98.694	0.999954	44.3733	2.14353e-05	71.08	0.999995	54.755	1.06673e-07	77.746	0.999999	61.4598	3.5525e-14	91.441	0.999996	54.6444	1.1099e-07	77.562	0.999999	60.6727	1.07092e-19	98.694	0.999996	54.4767	3.31842e-14	91.657	1	65.4678	1.49937e-19	97.797	0.999943
Q3TGG2;A0A0U1RPL0;Q7TQH0-3;Q7TQH0;Q7TQH0-2;E9Q5Q0	474;554;554;560;554;440	Q3TGG2	Q3TGG2	Ataxin-2-like protein	Atxn2l		0.329641	0	2.44104e-06	71.344	37.562	71.344	0.313985	0	4.26258e-05	53.252	0	0		NaN									0.329641	0	2.44104e-06	71.344	0.320922	0	0.00304203	41.052					0.311893	0	4.94318e-05	51.695					0.329641
Q3TGG2;A0A0U1RPL0;Q7TQH0-3;Q7TQH0;Q7TQH0-2;E9Q5Q0	475;555;555;561;555;441	Q3TGG2	Q3TGG2	Ataxin-2-like protein	Atxn2l		0.329641	0	2.44104e-06	71.344	37.562	71.344	0.313985	0	4.26258e-05	53.252	0	0		NaN									0.329641	0	2.44104e-06	71.344	0.320922	0	0.00304203	41.052					0.311893	0	4.94318e-05	51.695					0.329641
Q3TGG2;A0A0U1RPL0;Q7TQH0-3;Q7TQH0;Q7TQH0-2;E9Q5Q0	476;556;556;562;556;442	Q3TGG2	Q3TGG2	Ataxin-2-like protein	Atxn2l		0.766944	8.49678	1.88931e-06	72.417	37.213	69.594	0.313985	0	4.26258e-05	53.252	0	0		NaN	0.766944	8.49678	4.45145e-06	69.594					0.329641	0	2.44104e-06	71.344	0.320922	0	0.00304203	41.052					0.311893	0	4.94318e-05	51.695	0.414518	1.61501	2.44104e-06	71.344	0.329641
Q3TGG2;A0A0U1RPL0;Q7TQH0-3;Q7TQH0;Q7TQH0-2;E9Q5Q0	367;447;447;453;447;333	Q3TGG2	Q3TGG2	Ataxin-2-like protein	Atxn2l		0.999702	35.2499	0.00771703	52.49	40.721	52.49													0.999702	35.2499	0.00771703	52.49					0.998729	28.9517	0.0208365	41.54
Q3TGG2;A0A0U1RPL0;Q7TQH0-3;Q7TQH0;Q7TQH0-2;E9Q5Q0	247;333;333;333;333;213	Q3TGG2	Q3TGG2	Ataxin-2-like protein	Atxn2l		0.544096	1.5113	0.000536765	52.254	34.445	43.512	0.497947	0	0.00123698	47.545	0.495768	0	0.00145134	46.319	0.544096	1.5113	0.00179505	44.567	0	0		NaN	0	0		NaN	0.491566	0	0.00212433	43.297	0.494446	0	0.000536765	52.254	0	0		NaN	0.491337	0	0.00224993	42.813	0
Q3TGG2;A0A0U1RPL0;Q7TQH0-3;Q7TQH0;Q7TQH0-2;E9Q5Q0	251;337;337;337;337;217	Q3TGG2	Q3TGG2	Ataxin-2-like protein	Atxn2l		0.841669	7.84941	8.88782e-05	62.861	48.415	51.147	0.497947	0	0.00123698	47.545	0.495768	0	0.00145134	46.319	0.495051	0	0.00179505	44.567	0.56689	1.21996	8.88782e-05	62.861	0.841669	7.84941	0.000607551	51.147	0.491566	0	0.00212433	43.297	0.494446	0	0.000536765	52.254	0	0		NaN	0.491337	0	0.00224993	42.813	0
Q3TGG2;A0A0U1RPL0;Q7TQH0-3;Q7TQH0;Q7TQH0-2;E9Q5Q0	413;493;493;499;493;379	Q3TGG2	Q3TGG2	Ataxin-2-like protein	Atxn2l		0.714463	5.11017	1.64168e-24	48.281	44.469	48.281													0.714463	5.11017	1.64168e-24	48.281
Q3TGG2;A0A0U1RPL0;Q7TQH0-3;Q7TQH0;Q7TQH0-2;E9Q5Q0	597;677;677;683;677;563	Q3TGG2	Q3TGG2	Ataxin-2-like protein	Atxn2l		0.722349	8.17629	0.00884755	40.496	18.365	40.496													0	0		NaN													0.722349	8.17629	0.00884755	40.496
A0A0U1RPR0;M0QWV3;Q8R1B4	39;39;39	A0A0U1RPR0	A0A0U1RPR0	Eukaryotic translation initiation factor 3 subunit C	G730046D07Rik;Eif3c		0.999771	36.3946	0.000194761	62.042	48.689	62.042													0	0		NaN	0.998708	28.8825	0.000390021	58.21	0.996943	25.1331	0.00313981	44.457	0.998917	29.6509	0.00112122	50.897	0.960482	13.857	0.00244984	46.481	0.992137	21.0097	0.00388631	42.785	0.999771
A0A0U1RPV7;Q3TZX8-3;Q3TZX8-2;Q3TZX8	126;128;128;128	A0A0U1RPV7	A0A0U1RPV7	Polynucleotide 5'-hydroxyl-kinase NOL9	Nol9		0.999976	46.2246	2.47115e-05	69.451	29.533	69.451													0.999976	46.2246	2.47115e-05	69.451	0.990117	20.0079	0.0153173	44.299					0.989113	19.5834	0.00807927	42.809									0.985004
A0A0U1RQB6;F8VPR5;P45481;B2RWS6	2322;2360;2360;2322	A0A0U1RQB6	A0A0U1RQB6	CREB-binding protein;Histone acetyltransferase p300	Crebbp;Ep300		0.467894	0	0.000363044	50.874	37.285	50.874	0	0		NaN									0.467894	0	0.000363044	50.874
A0A0U1RQB6;F8VPR5;P45481;B2RWS6	2323;2361;2361;2323	A0A0U1RQB6	A0A0U1RQB6	CREB-binding protein;Histone acetyltransferase p300	Crebbp;Ep300		0.850714	8.79117	1.30898e-17	101.05	57.871	101.05	0	0		NaN									0.850714	8.79117	1.30898e-17	101.05
A0A0U1RQB6;F8VPR5;P45481;B2RWS6	2325;2363;2363;2325	A0A0U1RQB6	A0A0U1RQB6	CREB-binding protein;Histone acetyltransferase p300	Crebbp;Ep300		0.74079	5.66627	0.00140741	41.695	27.437	41.695	0	0		NaN																									0.74079	5.66627	0.00140741	41.695
A0A0U1RQB6;F8VPR5;P45481	2026;2064;2064	A0A0U1RQB6	A0A0U1RQB6	CREB-binding protein	Crebbp		0.987135	19.3077	8.09828e-05	74.76	53.129	74.76	0	0		NaN	0.88067	9.05071	0.000332931	62.303	0	0		NaN	0	0		NaN	0	0		NaN	0.987135	19.3077	8.09828e-05	74.76	0	0		NaN	0	0		NaN	0	0		NaN	0
A0A0X1KG62;Q8C4Y3	608;557	A0A0X1KG62	A0A0X1KG62	Negative elongation factor B	Nelfb		0.496855	0	5.69243e-20	66.853	63.517	60.464	0.4764	0	6.19336e-14	59.943	0.443371	0	2.73793e-07	49.106	0.496855	0	5.32425e-14	60.464	0.482438	0	1.2193e-09	52.321	0.488269	0	5.26831e-10	55.228	0.479161	0	5.69243e-20	66.853	0.441211	0	8.87732e-06	43.611	0.482354	0	5.32425e-14	60.464	0.442975	0	1.35158e-05	42.806	0.492877
A0A140LHJ3;A0A140LJK5;A0A140LHB3;A0A140LIS6;A0A140LHZ5;D3Z158;Q8BML9	70;58;67;70;70;70;70	A0A140LHJ3	A0A140LHJ3		Qars		1	64.0333	1.3381e-13	112.17	73.984	84.658	1	64.0333	1.38516e-05	84.658	0.997887	29.0276	0.00112397	62.466	0.999823	37.8207	2.44593e-08	90.348	0.999961	44.1283	1.3381e-13	112.17	0.998918	29.7988	5.16127e-05	77.42	0.999999	61.8033	2.52998e-12	103.39	0.999846	38.9353	2.72823e-05	80.387	0.999938	43.1731	0.000493246	69.672	0.998506	28.2925	9.37851e-05	67.326	0.998502
A0A140LHJ8;A0A140LHL7;H3BJM2;A0A140LJK1;A0A140LIV3;A0A140LHZ8;H3BJI1;H3BLI4;A0A140LHE2;A0A140LIQ9;Q9D007;A0A140LI14;H3BKJ3;A0A140LIM0;A0A140LID0;H3BK47;A0A140LHP6;A0A140LHF4;H3BKN5;E9QAB8;H3BJK2;F2Z4A9;H3BLH0;Q6DIC0	51;13;41;41;41;81;41;81;81;81;41;81;41;65;170;81;83;81;195;1388;1330;1388;1388;1382	A0A140LHJ8	A0A140LHJ8	Probable global transcription activator SNF2L2	Smarca2		1	95.8733	1.22684e-29	114.59	102.97	95.873	1	104.438	2.64409e-22	104.44	1	95.8733	2.79503e-15	95.873	1	56.8168	0.000245723	56.817	1	58.2461	0.000200232	58.246	1	61.1268	0.000144492	61.127	1	74.7718	9.49513e-06	74.772	1	73.4642	1.37162e-05	73.464	1	65.231	7.77639e-05	65.231	1	66.8092	5.9912e-05	66.809	1
A0A140LHE6;P70671	135;135	A0A140LHE6	A0A140LHE6	Interferon regulatory factor 3	Irf3		0.999999	62.6998	1.53143e-18	120.87	78.273	120.87	0.999809	38.8169	0.000272859	55.885	0.999945	45.5791	0.000195418	58.071	0.999898	41.5556	0.000411735	52.527	0.999897	40.8432	0.000243348	56.599	0.999998	59.5208	6.88562e-05	64.675	0.999836	39.7998	0.0010486	45.115	0.99968	37.9621	0.000818034	47.532	0.999902	40.8079	0.000379772	53.3					0.999974
A0A140LHP9;Q9JME5	272;272	A0A140LHP9	A0A140LHP9	AP-3 complex subunit beta-2	Ap3b2		0.798316	8.74054	1.54015e-19	65.901	56.758	51.568									0.339004	0	1.92947e-05	43.523	0.527091	0.476421	1.54015e-19	65.901	0.526081	0.455287	2.26786e-19	64.028									0.344506	0	3.00933e-09	51.296	0.798316	8.74054	2.87573e-09	51.568	0.727274
A0A140LHP9;Q9JME5	282;282	A0A140LHP9	A0A140LHP9	AP-3 complex subunit beta-2	Ap3b2		0.385931	0.237635	3.00933e-09	51.296	38.741	42.828					0.385931	0.237635	2.75348e-05	42.828	0.339004	0	1.92947e-05	43.523																	0.344506	0	3.00933e-09	51.296
A0A140LHS5;Q5SXE4;Q61097-2;Q61097	245;320;320;320	A0A140LHS5	A0A140LHS5	Kinase suppressor of Ras 1	Ksr1		1	62.2875	1.59845e-12	101.36	77.981	62.287	1	65.4716	6.09523e-05	65.472	1	62.2875	0.000107472	62.287	1	41.9666	0.00174189	41.967	1	101.357	1.59845e-12	101.36	1	82.9077	4.76312e-06	82.908	1	49.3096	0.00064839	49.31	1	40.0246	0.00217767	40.025	1	61.0971	0.000132302	61.097	1	72.4172	2.18981e-05	72.417	1
A0A140LHS5;Q5SXE4;Q61097-2;Q61097	317;392;392;392	A0A140LHS5	A0A140LHS5	Kinase suppressor of Ras 1	Ksr1		0.957207	14.4658	5.25799e-05	68.809	55.977	61.212	0.881126	9.25559	0.000256739	59.185									0.900257	9.62469	5.25799e-05	68.809	0.634909	2.45951	0.000201422	61.212					0.665588	3.13803	0.00312003	41.092					0.887826	9.08618	0.000680952	51.875	0.679995
A0A140LHX3;Q91VU8	15;53	A0A140LHX3	A0A140LHX3	Prostate tumor-overexpressed gene 1 protein homolog	Ptov1		1	48.704	0.00191004	48.704	32.072	48.704													1	48.704	0.00191004	48.704													0	0		NaN
A0A140LI60;K3W4R2;Q6URW6-2;Q6URW6;Q6URW6-3	1218;1973;1965;1973;2006	A0A140LI60	A0A140LI60	Myosin-14	Myh14		0.499952	0	2.43693e-11	46.415	40.384	46.415									0.499927	0	2.72981e-11	45.836																	0.499925	0	4.66239e-08	41.83					0.499952
A0A140LI60;K3W4R2;Q6URW6-2;Q6URW6;Q6URW6-3	1230;1985;1977;1985;2018	A0A140LI60	A0A140LI60	Myosin-14	Myh14		0.499952	0	2.43693e-11	46.415	40.384	46.415									0.499927	0	2.72981e-11	45.836																	0.499925	0	4.66239e-08	41.83					0.499952
A0A140LIS5;Q3UL36-2;Q3UL36	73;57;75	A0A140LIS5	A0A140LIS5	Arginine and glutamate-rich protein 1	Arglu1		0.978797	16.643	1.06777e-06	86.641	81.362	79.771	0.976051	16.1019	0.00023358	57.973	0.841987	7.26612	0.000794132	50.079	0.910303	10.0641	0.00021136	58.723	0.844716	7.35585	0.000607551	51.147	0.859047	7.84941	0.000607551	51.147	0.828201	6.83115	1.06777e-06	86.641	0.847451	7.44704	0.000536765	52.254	0.874954	8.44915	0.00046413	53.565	0.814233	6.41779	0.000146379	60.918	0.978797
A0A140LIT9;Q7TSJ2	484;687	A0A140LIT9	A0A140LIT9	Microtubule-associated protein 6	Map6		1	44.2031	0.0275734	44.203	19.28	44.203																																	0	0		NaN
A0A140LIT9;Q7TSJ2	429;632	A0A140LIT9	A0A140LIT9	Microtubule-associated protein 6	Map6		0.998384	28.937	0.00423805	45.879	32.526	45.879													0.998384	28.937	0.00423805	45.879
A0A140LIW4;G5E8A7;Q80XS6	172;172;172	A0A140LIW4	A0A140LIW4	Protein Smaug homolog 2	Samd4b		1	43.895	9.9011e-06	43.895	30.707	43.895					0	0		NaN					1	43.895	9.9011e-06	43.895
E9Q5W5;A0A140LJ04;Q5SSH7-2;Q5SSH7	1538;1538;1538;1538	E9Q5W5	E9Q5W5	Zinc finger ZZ-type and EF-hand domain-containing protein 1	Zzef1		0.999923	41.1698	9.16495e-08	93.011	41.17	93.011	0.990899	20.4366	0.000665059	68.44	0.907766	9.94302	0.00130266	65.395	0.910948	10.1103	0.00126763	65.563	0.999923	41.1698	9.16495e-08	93.011	0.988377	19.3077	0.000550222	74.76	0.999797	36.9862	5.31841e-05	85.554	0.997786	26.5556	0.000250738	80.522	0.864826	8.09597	0.0222118	45.077	0.985927	18.6057	0.00710685	54.343	0.996889
E9Q5W5;A0A140LJ04;Q5SSH7-2;Q5SSH7	1463;1463;1463;1463	E9Q5W5	E9Q5W5	Zinc finger ZZ-type and EF-hand domain-containing protein 1	Zzef1		0.32656	0	3.27344e-27	70.213	62.22	67.69	0.223241	0	4.31912e-07	49.199	0.236532	0	3.3181e-05	41.661	0.320685	0	8.64062e-07	47.159	0.307906	0	3.27344e-27	70.213	0	0		NaN	0.26851	0	4.79066e-05	40.112	0.319984	0	4.31912e-07	49.199	0	0		NaN	0.319952	0	1.46083e-14	63.122	0.32656
E9Q5W5;A0A140LJ04;Q5SSH7-2;Q5SSH7	1464;1464;1464;1464	E9Q5W5	E9Q5W5	Zinc finger ZZ-type and EF-hand domain-containing protein 1	Zzef1		0.32656	0	6.78096e-20	67.69	59.886	67.69																	0	0		NaN	0.26851	0	4.79066e-05	40.112					0	0		NaN					0.32656
E9Q263;A0A140LJ69;Q9Z1N9-2;Q9Z1N9-3;Q9Z1N9	298;3098;298;310;310	E9Q263	E9Q263	Protein unc-13 homolog B	Unc13b		0.756053	6.85634	0.000134653	55.755	44.809	55.755	0	0		NaN					0	0		NaN	0	0		NaN	0	0		NaN	0	0		NaN					0	0		NaN	0	0		NaN	0.756053
D3Z684;A0A140LJ80;Q9CWY4	3;3;3	D3Z684	D3Z684	Gem-associated protein 7	Gemin7		0.999193	30.9263	2.19885e-14	92.939	77.05	69.714	0.995321	23.2778	0.000129369	56.482	0.999193	30.9263	2.98535e-05	69.714	0.997466	25.9506	2.19885e-14	92.939	0.998567	28.4312	7.29032e-05	66.797	0.998481	28.1779	0.00013472	56.147	0	0		NaN													0.979294
A0A140LJB7;Q3MIA8;G3UXW9;Q99LD4	463;464;503;448	A0A140LJB7	A0A140LJB7	COP9 signalosome complex subunit 1	Gps1		0.496782	0	8.22427e-07	50.539	42.359	50.539	0	0		NaN													0	0		NaN	0	0		NaN	0.496782	0	8.22427e-07	50.539
A0A140LJB7;Q3MIA8;G3UXW9;Q99LD4	469;470;509;454	A0A140LJB7	A0A140LJB7	COP9 signalosome complex subunit 1	Gps1		0.496782	0	8.22427e-07	50.539	42.359	50.539	0	0		NaN													0	0		NaN	0	0		NaN	0.496782	0	8.22427e-07	50.539
A0A140LJH7;D3YY31;D3YZA9;Q3V1K7;Q8BXB6	35;35;35;31;21	A0A140LJH7	A0A140LJH7	Solute carrier organic anion transporter family member 2B1	Slco2b1		0.999801	37.0027	1.08373e-05	69.148	61.251	67.43	0.970787	15.2155	4.96753e-05	54.103	0.981558	17.2611	3.96866e-05	56.149	0.999801	37.0027	1.87806e-05	67.43	0.989362	19.6849	3.45817e-05	60.034	0.998988	29.9447	1.08373e-05	69.148	0.993494	21.8384	8.90449e-05	49.482	0.877439	8.54866	0.000114161	47.752	0.981868	17.3362	0.000114161	47.752	0.953445	13.1133	3.34114e-05	57.496	0.984613
E9Q394-2;E9Q394;A0A140LJJ5;A0A140LHG3	1868;1890;1908;189	E9Q394-2	E9Q394-2		Akap13		0.492726	0.960721	0.00217914	52.247	11.979	52.247													0.492726	0.960721	0.00217914	52.247
E9Q394-2;E9Q394;A0A140LJJ5;A0A140LHG3	1870;1892;1910;191	E9Q394-2	E9Q394-2		Akap13		0.92688	12.2663	2.02004e-05	79.633	42.453	75.739	0.92688	12.2663	3.75804e-05	75.739	0.487551	0	9.97242e-05	72.34	0.486994	0	0.000485766	63.473	0.450829	0	0.00182701	43.813	0.497856	0.0749014	0.000216695	68.515					0.721955	6.27116	0.0031618	49.081					0.38902	0	0.00593373	43.544	0.493057
E9Q394-2;E9Q394;A0A140LJJ5;A0A140LHG3	1873;1895;1913;194	E9Q394-2	E9Q394-2		Akap13		0.417409	1.68604	0.000857302	50.562	24.845	45.28																									0.417409	1.68604	0.00142886	45.28	0.399755	1.25287	0.000857302	50.562
E9Q394-2;E9Q394;A0A140LJJ5	2641;2663;2681	E9Q394-2	E9Q394-2		Akap13		0.94051	12.2351	1.38785e-05	41.711	38.658	41.711									0	0		NaN																									0
E9Q394-2;E9Q394;A0A140LJJ5;A0A140LHQ3;A0A140LID7;A0A140LIX0	1586;1608;1626;286;451;783	E9Q394-2	E9Q394-2		Akap13		0.425095	1.69919	0.000478766	46.3	31.881	46.3					0	0		NaN	0	0		NaN	0	0		NaN									0	0		NaN	0	0		NaN	0	0		NaN	0.425095
E9Q394-2;E9Q394;A0A140LJJ5;A0A140LHQ3;A0A140LID7;A0A140LIX0	1591;1613;1631;291;456;788	E9Q394-2	E9Q394-2		Akap13		0.983998	17.8881	6.6911e-46	121.74	111.64	121.74					0.873148	8.37811	3.94747e-11	85.146	0.860915	7.91834	2.13996e-05	67.43	0.982397	17.4671	2.76681e-40	116.98	0.978487	16.579	3.94747e-11	85.146					0.880988	8.69379	6.75324e-20	96.544	0.942061	12.1149	3.91297e-05	59.512	0.983998	17.8881	6.6911e-46	121.74	0.875183
E9Q394-2;E9Q394;A0A140LJJ5;A0A140LHG3	1817;1839;1857;138	E9Q394-2	E9Q394-2		Akap13		1	90.8652	5.71016e-43	111.92	95.24	111.92	0.999998	57.8228	1.40859e-09	78.285					0.999998	57.4655	1.6629e-09	77.562	0.999999	59.9178	1.11953e-07	75.463	0.999998	57.8228	1.40859e-09	78.285	1	90.8652	5.71016e-43	111.92	0.999972	45.6932	9.03483e-06	58.83	1	65.1334	4.40738e-14	84.874	0.999999	61.5299	7.17778e-14	82.59	1
E9Q394-2;E9Q394;A0A140LJJ5	2662;2684;2702	E9Q394-2	E9Q394-2		Akap13		0.621587	2.35522	0.0378602	41.621	27.851	41.621					0	0		NaN	0	0		NaN	0	0		NaN	0	0		NaN	0.621587	2.35522	0.0378602	41.621	0	0		NaN	0	0		NaN	0	0		NaN	0
E9Q394-2;E9Q394;A0A140LJJ5;A0A140LHQ3;A0A140LID7;A0A140LIX0	1522;1526;1522;222;365;719	E9Q394-2	E9Q394-2		Akap13		0.999927	41.3373	0.067162	61.962	32.489	61.962									0	0		NaN	0	0		NaN	0	0		NaN									0	0		NaN	0	0		NaN	0
A0A140T8I9;E9Q3L2	198;259	A0A140T8I9	A0A140T8I9		Pi4ka		0.894073	9.5931	8.85086e-10	85.288	71.885	85.288	0.823421	7.46932	0.00046842	68.069	0.692218	7.11928	0.00196851	58.676	0.894073	9.5931	8.85086e-10	85.288	0.762897	8.56368	0.000237911	60.401	0.875761	9.09819	0.000701782	64.55	0.3188	0	0.00196851	58.676	0.314622	0	0.00383674	54.143	0.808836	9.24312	0.00046842	68.069	0.416485	0	0.00134723	51.841	0.452067
A0A140T8I9;E9Q3L2	199;260	A0A140T8I9	A0A140T8I9		Pi4ka		0.452067	0	6.71488e-06	77.078	51.14	61.435	0.319573	0	0.00046842	68.069	0.3188	0	0.00196851	58.676	0.318797	0	0.00196851	58.676	0.363744	0.915485	6.43912e-05	68.069	0.323827	0	0.00778397	53.528	0.3188	0	0.00196851	58.676	0.314622	0	0.00383674	54.143	0.390951	0.752775	0.00046842	68.069	0.416485	0	0.00134723	51.841	0.452067
A0A140T8I9;E9Q3L2	201;262	A0A140T8I9	A0A140T8I9		Pi4ka		0.512884	0.793413	6.71488e-06	77.078	51.14	60.401									0	0		NaN	0.512884	0.793413	0.000237911	60.401	0	0		NaN	0	0		NaN					0.507906	0.752775	0.000589346	53.754	0	0		NaN	0.478682
A0A140T8I9;E9Q3L2	202;263	A0A140T8I9	A0A140T8I9		Pi4ka		0.478682	0	6.71488e-06	77.078	51.14	77.078									0	0		NaN					0	0		NaN	0	0		NaN									0	0		NaN	0.478682
A0A140T8I9;E9Q3L2	1378;1439	A0A140T8I9	A0A140T8I9		Pi4ka		0.999999	62.8106	0.000101303	78.692	62.811	78.692	0.999999	59.4601	0.000233256	74.611	0.999989	50.0284	0.00098462	65.179	0.999999	62.8106	0.000101303	78.692	0.999991	51.0442	0.0011385	63.091	0.999999	60.7075	0.000440648	70.488	0.999966	45.1171	0.00109052	57.164	0.99999	50.3606	0.0011226	62.408	0.999858	38.9661	0.00298897	51.013	0.999723	35.8622	0.00298897	51.013	0.999969
A0A140T8I9;E9Q3L2	1366;1427	A0A140T8I9	A0A140T8I9		Pi4ka		0.81502	6.44422	7.1869e-05	67.102	56.062	67.102	0.512959	0.420563	0.034	45.434	0.499319	0	0.00323457	46.964	0.81502	6.44422	7.1869e-05	67.102	0.55768	1.02044	8.89419e-05	66.059	0	0		NaN	0	0		NaN					0	0		NaN	0	0		NaN	0.494452
A0A1B0GRB5;A0A1B0GRA7;B2RQL0;A0A140T8J8;A0A1B0GSX7;Q6PFD9	591;608;591;608;608;608	A0A1B0GRB5	A0A1B0GRB5	Nuclear pore complex protein Nup98-Nup96;Nuclear pore complex protein Nup98;Nuclear pore complex protein Nup96	Nup98		0.248283	0	1.93223e-08	45.862	38.225	45.862
A0A1B0GRB5;A0A1B0GRA7;B2RQL0;A0A140T8J8;A0A1B0GSX7;Q6PFD9	595;612;595;612;612;612	A0A1B0GRB5	A0A1B0GRB5	Nuclear pore complex protein Nup98-Nup96;Nuclear pore complex protein Nup98;Nuclear pore complex protein Nup96	Nup98		0.551407	3.42323	4.53628e-18	58.349	52.254	58.349									0.305938	0	1.34525e-06	43.291					0.334813	1.55727	1.33365e-06	43.306									0.551407	3.42323	4.53628e-18	58.349
A0A1B0GRB5;A0A1B0GRA7;B2RQL0;A0A140T8J8;A0A1B0GSX7;Q6PFD9	601;618;601;618;618;618	A0A1B0GRB5	A0A1B0GRB5	Nuclear pore complex protein Nup98-Nup96;Nuclear pore complex protein Nup98;Nuclear pore complex protein Nup96	Nup98		0.400313	0	1.35362e-12	53.091	46.996	50.144	0.319973	0	1.32859e-09	50.857	0.400313	0	3.89861e-09	50.144	0.305938	0	1.34525e-06	43.291
A0A1B0GRB5;A0A1B0GRA7;B2RQL0;A0A140T8J8;A0A1B0GSX7;Q6PFD9	606;623;606;623;623;623	A0A1B0GRB5	A0A1B0GRB5	Nuclear pore complex protein Nup98-Nup96;Nuclear pore complex protein Nup98;Nuclear pore complex protein Nup96	Nup98		0.736023	6.80497	2.98025e-33	73.266	66.665	73.266	0.319973	0	1.32859e-09	50.857	0.400313	0	3.89861e-09	50.144	0.305938	0	1.34525e-06	43.291	0.530267	3.28788	3.0083e-33	73.24									0.736023	6.80497	2.98025e-33	73.266									0.358421
A0A140T8L5;F6YTZ4;P25444	192;246;264	A0A140T8L5	A0A140T8L5	40S ribosomal protein S2	Gm6576;Rps2		0.998897	30.7006	4.06679e-06	83.729	59.898	50.305	0.998477	28.2768	4.06679e-06	83.729	0.961599	14.1286	0.00171298	42.095	0	0		NaN	0	0		NaN	0.928544	11.1408	0.000161262	59.709	0.992965	21.5388	0.00031726	54.812	0.995969	23.9298	4.26142e-06	83.499	0.960633	13.883	1.03052e-05	54.65	0.993394	21.7876	0.000201338	57.788	0.986955
A0A140T8R7;Q8CFE3	156;254	A0A140T8R7	A0A140T8R7	REST corepressor 1	Rcor1		0.333333	0	5.6267e-05	40.404	35.084	40.404																									0	0		NaN									0.333333
A0A140T8R7;Q8CFE3	166;264	A0A140T8R7	A0A140T8R7	REST corepressor 1	Rcor1		0.333333	0	5.6267e-05	40.404	35.084	40.404																									0	0		NaN									0.333333
A0A140T8S5;Q8K327	432;432	A0A140T8S5	A0A140T8S5	Chromosome alignment-maintaining phosphoprotein 1	Champ1		0.333333	0	0.0008304	73.632	53.995	42.109					0.333333	0	0.0261588	42.109					0.333333	0	0.000993144	72.531	0.333333	0	0.0008304	73.632	0.333333	0	0.00716858	52.716					0.333333	0	0.00207544	67.726	0	0		NaN	0.333333
A0A140T8S5;Q8K327	433;433	A0A140T8S5	A0A140T8S5	Chromosome alignment-maintaining phosphoprotein 1	Champ1		0.333333	0	0.0008304	73.632	53.995	42.109					0.333333	0	0.0261588	42.109					0.333333	0	0.000993144	72.531	0.333333	0	0.0008304	73.632	0.333333	0	0.00716858	52.716					0.333333	0	0.00207544	67.726	0	0		NaN	0.333333
A0A140T8S5;Q8K327	434;434	A0A140T8S5	A0A140T8S5	Chromosome alignment-maintaining phosphoprotein 1	Champ1		0.698831	6.66592	1.99437e-05	86.911	56.182	86.911					0.333333	0	0.0261588	42.109	0.698831	6.66592	1.99437e-05	86.911	0.333333	0	0.000993144	72.531	0.333333	0	0.0008304	73.632	0.333333	0	0.00716858	52.716					0.333333	0	0.00207544	67.726	0	0		NaN	0.333333
A0A140T8S5;Q8K327	603;603	A0A140T8S5	A0A140T8S5	Chromosome alignment-maintaining phosphoprotein 1	Champ1		0.83694	7.79711	1.17232e-05	82.362	41.079	60.49	0.776147	7.6019	1.17232e-05	82.362	0	0		NaN	0.79281	8.33156	0.00490854	44.616	0.772409	7.56268	8.84275e-05	72.958	0.810337	9.31714	0.000289029	67.153	0.743178	5.67164	0.000412573	64.827	0.695879	6.60518	0.00303825	49.448									0.83694
A0A140T8S5;Q8K327	416;416	A0A140T8S5	A0A140T8S5	Chromosome alignment-maintaining phosphoprotein 1	Champ1		1	56.6881	3.51667e-08	84.566	72.403	56.688	1	44.9306	7.57257e-06	77.527	1	56.6881	1.78824e-07	68.83	1	53.4749	7.90906e-07	61.212	1	46.6604	2.13186e-06	84.566	1	58.8772	3.51667e-08	70.622	1	42.3467	5.64867e-05	68.83	1	59.6073	0.000203067	59.607	1	68.8302	5.64867e-05	68.83	1	49.1862	1.29419e-05	68.83	1
A0A140T8S5;Q8K327	421;421	A0A140T8S5	A0A140T8S5	Chromosome alignment-maintaining phosphoprotein 1	Champ1		1	56.6881	3.51667e-08	58.877	49.82	56.688	1	44.9306	3.80507e-05	44.931	1	56.6881	1.78824e-07	56.688	1	53.4749	7.90906e-07	53.475	1	46.6604	2.74591e-05	46.66	1	58.8772	3.51667e-08	58.877	1	42.3467	7.34496e-05	42.347									1	49.1862	1.29419e-05	49.186	1
A0A140T8S5;Q8K327	425;425	A0A140T8S5	A0A140T8S5	Chromosome alignment-maintaining phosphoprotein 1	Champ1		1	56.6881	3.51667e-08	58.877	49.82	56.688	1	44.9306	3.80507e-05	44.931	1	56.6881	1.78824e-07	56.688	1	53.4749	7.90906e-07	53.475	1	46.6604	2.74591e-05	46.66	1	58.8772	3.51667e-08	58.877	1	42.3467	7.34496e-05	42.347									1	49.1862	1.29419e-05	49.186	1
A0A140T8V9;Q8VDC1	196;196	A0A140T8V9	A0A140T8V9	FYVE and coiled-coil domain-containing protein 1	Fyco1		1	91.5272	3.54089e-114	170.09	146.63	155.92	1	72.7503	6.19783e-86	159.69	1	91.5272	3.94899e-75	155.92	1	74.1057	3.54089e-114	170.09	0.999999	62.4101	1.50505e-75	156.5	1	77.2191	5.86082e-59	144.33	0.999777	37.5322	1.53821e-47	127.83	0.999949	43.9769	1.8886e-47	126.88	0.999992	52.6665	7.89293e-65	144.73	0.999995	53.9215	2.37196e-52	137.61	1
A0A171EBK7	232	A0A171EBK7	A0A171EBK7				0.436031	0	1.90929e-10	56.22	49.189	56.22									0.331121	0	8.3859e-06	43.24									0.413185	0	5.0398e-08	50.66					0.428884	0	1.78074e-07	49.199
A0A171EBK7	233	A0A171EBK7	A0A171EBK7				0.436031	0	1.90929e-10	56.22	49.189	56.22									0.331121	0	8.3859e-06	43.24									0.413185	0	5.0398e-08	50.66					0.428884	0	1.78074e-07	49.199
A0A171EBK8;Q5SVL6-2;Q5SVL6	649;395;589	A0A171EBK8	A0A171EBK8	Rap1 GTPase-activating protein 2	Rap1gap2		0.782656	8.06151	2.54619e-49	123.02	113.07	113.25	0.490694	0	4.37069e-14	90.685					0.645659	3.96836	1.28149e-28	107.11	0.571479	1.25832	2.54619e-49	123.02	0.455282	0	1.02593e-08	81.865									0.438491	0	1.09148e-07	77.64	0.534953	0.990627	3.05558e-27	106.13	0.782656
A0A171EBK8;Q5SVL6-2;Q5SVL6	650;396;590	A0A171EBK8	A0A171EBK8	Rap1 GTPase-activating protein 2	Rap1gap2		0.689756	3.79589	1.81866e-20	100.55	85.288	95.651	0.490694	0	4.37069e-14	90.685	0.689756	3.79589	2.52533e-19	95.651									0.455282	0	1.02593e-08	81.865	0.539495	1.03152	1.81866e-20	100.55					0.438491	0	1.09148e-07	77.64
A0A171EBK8;Q5SVL6-2;Q5SVL6	653;399;593	A0A171EBK8	A0A171EBK8	Rap1 GTPase-activating protein 2	Rap1gap2		0.439671	0	6.16518e-05	67.726	52.46	43.628																	0.434464	0	6.16518e-05	67.726																	0.439671
A0A171EBK8;Q5SVL6-2;Q5SVL6	654;400;594	A0A171EBK8	A0A171EBK8	Rap1 GTPase-activating protein 2	Rap1gap2		0.826416	6.98107	6.16518e-05	67.726	52.46	56.482									0.826416	6.98107	0.000134748	56.482					0.434464	0	6.16518e-05	67.726																	0.439671
A0A171EBK8;Q5SVL6-2;Q5SVL6	548;294;488	A0A171EBK8	A0A171EBK8	Rap1 GTPase-activating protein 2	Rap1gap2		0.999992	51.5086	4.09696e-23	136.99	121.1	113.65	0.999777	36.5893	1.50997e-12	96.464	0.999872	39.4087	1.59674e-12	98.592	0.999992	51.5086	2.19337e-15	113.65	0.998931	29.7174	3.14911e-19	122.97	0.999857	38.4927	2.09047e-16	119.01	0.999872	41.3159	4.09696e-23	136.99	0.999747	36.0512	5.00525e-12	98.942	0.999939	42.6162	3.4272e-19	122.64	0.999092	30.793	8.82377e-05	76.073	0.999858
A0A171EBK8;Q5SVL6-2;Q5SVL6	555;301;495	A0A171EBK8	A0A171EBK8	Rap1 GTPase-activating protein 2	Rap1gap2		0.999942	42.4969	2.64204e-07	87.566	61.7	78.69	0.999839	38.1104	5.01835e-05	62.377	0.997534	26.1443	2.85047e-05	64.52	0.9999	40.0206	2.64204e-07	87.566	0.999942	42.4969	7.11398e-06	78.69					0.999747	36.2263	8.37323e-06	70.529	0.994964	23.5433	0.000995889	43.592	0.998864	29.4917	8.58358e-06	69.729	0	0		NaN	0
A0A171EBL2;E9Q555	2973;2974	A0A171EBL2	A0A171EBL2	E3 ubiquitin-protein ligase RNF213	Rnf213		1	41.2833	0.032308	41.283	7.3226	41.283									0	0		NaN	0	0		NaN									1	41.2833	0.032308	41.283	0	0		NaN	0	0		NaN
A0A1B0GRM0;A0A1B0GR06;Q64700	37;37;37	A0A1B0GRM0	A0A1B0GRM0	Retinoblastoma-like protein 2	Rbl2		0.837244	7.11315	3.16376e-05	65.943	54.673	65.943	0	0		NaN									0	0		NaN					0.837244	7.11315	3.16376e-05	65.943					0	0		NaN
A0A1B0GRM0;A0A1B0GR06;Q64700	1063;1096;1106	A0A1B0GRM0	A0A1B0GRM0	Retinoblastoma-like protein 2	Rbl2		0.5	0	0.00419397	42.095	30.944	42.095	0.5	0	0.00419397	42.095					0	0		NaN					0	0		NaN	0	0		NaN
A0A1B0GRM0;A0A1B0GR06;Q64700	1065;1098;1108	A0A1B0GRM0	A0A1B0GRM0	Retinoblastoma-like protein 2	Rbl2		0.5	0	0.00419397	42.095	30.944	42.095	0.5	0	0.00419397	42.095					0	0		NaN					0	0		NaN	0	0		NaN
A0A1B0GRM0;A0A1B0GR06;Q64700	1021;1054;1064	A0A1B0GRM0	A0A1B0GRM0	Retinoblastoma-like protein 2	Rbl2		0.934114	11.6618	4.46592e-06	47.537	38.394	47.537	0	0		NaN																	0.934114	11.6618	4.46592e-06	47.537					0	0		NaN					0
A0A1B0GRM0;A0A1B0GR06;Q64700	593;626;636	A0A1B0GRM0	A0A1B0GRM0	Retinoblastoma-like protein 2	Rbl2		0.913176	10.6495	0.000201422	61.212	48.256	61.212	0.913176	10.6495	0.000201422	61.212	0	0		NaN	0	0		NaN	0	0		NaN									0	0		NaN					0	0		NaN	0
A0A1B0GR11;Q93092	282;237	A0A1B0GR11	A0A1B0GR11	Transaldolase	Taldo1		1	67.3921	0.000838688	77.379	47.906	77.379	0.999998	57.9889	0.00200318	64.439	1	67.3921	0.000838688	77.379	0.999996	53.96	0.00204873	58.37	1	67.3921	0.000838688	77.379	0.999959	43.8426	0.00450195	50.292	0.999982	47.3332	0.00376443	51.268	0.999941	42.2914	0.003481	52.278	0.999926	41.2807	0.00376443	51.268	0.999985	48.1453	0.00523431	49.35	0.999994
A0A1B0GR54;O09053	648;891	A0A1B0GR54	A0A1B0GR54	Werner syndrome ATP-dependent helicase homolog	Wrn		0.977202	16.3209	0.00177075	52.716	14.989	52.716													0.977202	16.3209	0.00177075	52.716	0	0		NaN					0	0		NaN	0	0		NaN	0	0		NaN	0
A0A1B0GR85	1132	A0A1B0GR85	A0A1B0GR85				0.869211	8.22555	0.000272082	66.595	47.501	66.595	0.5	0	0.0278166	59.426					0	0		NaN	0.867277	8.15211	0.000949482	65.5					0	0		NaN					0.869211	8.22555	0.000272082	66.595	0	0		NaN
A0A1B0GR85;A0A1D5RLN6;Q8BRV5	1761;379;302	A0A1B0GR85	A0A1B0GR85	Uncharacterized protein KIAA1671	Kiaa1671		0.999966	44.727	8.84626e-06	94.767	72.681	94.767	0	0		NaN									0.999855	38.3704	0.0143435	65.5					0	0		NaN					0.999966	44.727	8.84626e-06	94.767					0
A0A1B0GR85	1027	A0A1B0GR85	A0A1B0GR85				0.497192	0	4.64335e-05	42.904	30.601	42.904					0	0		NaN					0	0		NaN													0	0		NaN					0.497192
A0A1B0GR85	1331	A0A1B0GR85	A0A1B0GR85				0.884751	8.93718	1.27619e-11	77.593	44.473	56.225	0.807837	6.82677	0.000346843	62.088	0.884751	8.93718	0.00198746	56.225																					0.862657	8.65389	0.0127615	47.288					0.800278
A0A1B0GRJ0;E9Q8L9;Q9D620	357;357;357	A0A1B0GRJ0	A0A1B0GRJ0	Rab11 family-interacting protein 1	Rab11fip1		0.591481	2.22699	4.50221e-05	79.82	12.095	79.82													0.474252	0	5.8526e-05	78.653	0.333333	0	0.000454055	60.434									0.591481	2.22699	4.50221e-05	79.82
A0A1B0GRJ0;E9Q8L9;Q9D620	358;358;358	A0A1B0GRJ0	A0A1B0GRJ0	Rab11 family-interacting protein 1	Rab11fip1		0.784874	8.63138	8.66933e-13	107.85	70.166	107.85													0.474252	0	5.8526e-05	78.653	0.333333	0	0.000454055	60.434																	0.784874
A0A1B0GRV3;P48377	110;110	A0A1B0GRV3	A0A1B0GRV3	MHC class II regulatory factor RFX1	Rfx1		0.133323	0	9.17585e-08	41.661	37.956	41.661
A0A1B0GRV3;P48377	113;113	A0A1B0GRV3	A0A1B0GRV3	MHC class II regulatory factor RFX1	Rfx1		0.133323	0	9.17585e-08	41.661	37.956	41.661
A0A1B0GRV3;P48377	115;115	A0A1B0GRV3	A0A1B0GRV3	MHC class II regulatory factor RFX1	Rfx1		0.133323	0	9.17585e-08	41.661	37.956	41.661
A0A1B0GRV3;P48377	116;116	A0A1B0GRV3	A0A1B0GRV3	MHC class II regulatory factor RFX1	Rfx1		0.133323	0	9.17585e-08	41.661	37.956	41.661
A0A1B0GRV3;P48377	119;119	A0A1B0GRV3	A0A1B0GRV3	MHC class II regulatory factor RFX1	Rfx1		0.133323	0	9.17585e-08	41.661	37.956	41.661
A0A1B0GRX5;Q3U4B1	219;320	A0A1B0GRX5	A0A1B0GRX5		Ssbp4		0.999988	49.4695	2.45016e-05	65.225	38.256	65.225	0.999988	49.4695	2.45016e-05	65.225	0	0		NaN	0	0		NaN	0.999011	30.0528	2.93829e-05	61.692					0.999837	38.626	4.98207e-05	51.606	0.999815	38.2845	5.13138e-05	51.265	0.999795	37.6279	6.91713e-05	50.608					0.999933
A0A1B0GS41;Q9QYY0	714;684	A0A1B0GS41	A0A1B0GS41	GRB2-associated-binding protein 1	Gab1		0.452905	0	1.45044e-05	57.989	36.86	57.989	0	0		NaN																	0.442666	0	6.54571e-05	49.089	0.452905	0	1.45044e-05	57.989	0	0		NaN					0
A0A1B0GS41;Q9QYY0	717;687	A0A1B0GS41	A0A1B0GS41	GRB2-associated-binding protein 1	Gab1		0.360728	0.980195	1.45044e-05	57.989	43.219	57.989	0	0		NaN	0.354722	0.746158	1.93471e-05	55.383									0.360728	0.980195	1.45044e-05	57.989									0	0		NaN					0
A0A1B0GS41;Q9QYY0	304;304	A0A1B0GS41	A0A1B0GS41	GRB2-associated-binding protein 1	Gab1		0.770225	5.64505	9.99351e-09	64.069	52.216	42.322	0	0		NaN	0	0		NaN					0	0		NaN	0	0		NaN	0	0		NaN	0	0		NaN	0	0		NaN	0	0		NaN	0.43504
A0A1B0GS41;Q9QYY0	251;251	A0A1B0GS41	A0A1B0GS41	GRB2-associated-binding protein 1	Gab1		0.999496	35.2857	2.27172e-45	124.07	105.65	105	0.990342	20.2021	5.48116e-19	96.464					0.872532	8.43691	7.61003e-19	94.728					0.997499	27.0584	3.40397e-26	102.73	0.967584	16.8769	9.44821e-11	87.498					0.982429	17.5032	1.65266e-26	105	0.890127	9.1834	6.47866e-19	95.651	0.998853
A0A1B0GS41;Q9QYY0	665;635	A0A1B0GS41	A0A1B0GS41	GRB2-associated-binding protein 1	Gab1		0.388589	1.04189	2.36513e-09	70.091	55.169	69.922	0	0		NaN	0	0		NaN	0.38442	0.965607	2.36513e-09	70.091	0	0		NaN	0	0		NaN	0	0		NaN	0	0		NaN	0	0		NaN	0	0		NaN	0.388589
A0A1B0GS41;Q9QYY0	390;390	A0A1B0GS41	A0A1B0GS41	GRB2-associated-binding protein 1	Gab1		0.495949	0	0.000427248	64.55	49.877	64.55									0	0		NaN																									0.495949
A0A1B0GS41;Q9QYY0	420;420	A0A1B0GS41	A0A1B0GS41	GRB2-associated-binding protein 1	Gab1		0.987581	22.016	1.01749e-12	107.09	80.119	80.69	0.945117	15.3708	4.88182e-05	79.492	0.971047	15.5829	8.31612e-05	76.522	0.976212	16.4233	1.01749e-12	107.09	0.987535	19.0646	5.99803e-06	84.169	0.965547	15.2213	1.11594e-05	84.289	0.945116	15.3708	4.88182e-05	79.492	0.984866	21.396	7.10242e-05	72.958	0.945117	15.3708	4.88182e-05	79.492	0.948391	15.653	2.07411e-05	81.92	0.987581
A0A1B0GS41;Q9QYY0	455;455	A0A1B0GS41	A0A1B0GS41	GRB2-associated-binding protein 1	Gab1		0.998024	31.2943	7.63493e-20	63.706	57.202	47.96					0.980953	18.2129	5.64667e-14	58.498	0.970194	17.3108	5.76828e-06	43.831	0.998024	31.2943	2.863e-07	47.96	0.94971	15.9272	4.44414e-07	46.15	0.996606	26.3108	5.66725e-11	57.078					0.961114	15.5497	3.12652e-10	55.442	0.981488	17.6407	7.63493e-20	63.706
A0A1B0GS41;Q9QYY0	266;266	A0A1B0GS41	A0A1B0GS41	GRB2-associated-binding protein 1	Gab1		0.997872	26.7796	0.000336593	87.298	66.428	87.298					0.979687	17.148	0.00849186	45.161	0.887872	9.03419	0.00833091	45.368	0.984506	18.0388	0.0020692	64.04	0.981691	17.355	0.00833091	45.368	0.986301	18.8793	0.0020692	64.04	0.980814	17.148	0.00849186	45.161	0.997872	26.7796	0.000336593	87.298
A0A1B0GS49;Q7TN37	380;527	A0A1B0GS49	A0A1B0GS49	Transient receptor potential cation channel subfamily M member 4	Trpm4		0.496898	0	0.0146406	53.3	39.637	53.3	0	0		NaN	0	0		NaN																					0.496898	0	0.0146406	53.3	0	0		NaN
A0A1B0GS90;A0A1B0GSS3;D3Z632;D3Z2J4;Q64362	30;30;30;30;30	A0A1B0GS90	A0A1B0GS90	AKT-interacting protein	Aktip		0.877539	8.55285	2.61351e-12	110.92	79.737	64.394	0.499999	0	0.000357102	70.089	0	0		NaN	0.823348	6.68471	4.73377e-05	73.848	0.877539	8.55285	3.40072e-11	98.942	0.499995	0	0.0162901	52.265	0.499999	0	0.00500805	61.212	0.499982	0	0.00124097	65.395	0.499069	0	0.0210464	45.137	0.499745	0	0.00367703	58.674	0.825465
Q8K4L2;A0A1B0GS91;Q8K4L3;E9Q3Z5;Q8K4L3-3	50;137;50;50;50	Q8K4L2;Q8K4L3-3	Q8K4L2	Supervillin	Svil		0.999998	57.5396	6.79839e-08	89.548	71.28	89.548	0.999995	52.65	7.37278e-06	84.658	0.999952	43.213	0.000184128	69.01	0.999988	49.3031	7.79728e-05	68.034	0.999911	40.492	0.000240414	68.069	0.999978	46.6442	2.32762e-05	78.653	0.998456	28.1066	0.000577195	57.836	0.999998	57.5396	6.79839e-08	89.548	0.999971	45.3654	0.000129096	68.069	0.999908	40.3558	0.000239591	59.185	0.999856
Q8K4L2;A0A1B0GS91;Q8K4L3;E9Q3Z5;Q8K4L3-3	761;848;761;647;357	Q8K4L2;Q8K4L3-3	Q8K4L2	Supervillin	Svil		0.999943	46.9839	1.49516e-11	58.087	53.131	57.427									0.999943	46.9839	1.89137e-10	57.427	0.998387	31.6807	4.29307e-08	54.259									0	0		NaN	0.999887	44.8055	9.61685e-09	56.728	0	0		NaN	0.999941
Q8K4L2;A0A1B0GS91;Q8K4L3	271;358;271	Q8K4L2	Q8K4L2	Supervillin	Svil		0.998215	27.5574	4.44833e-06	75.669	65.982	75.669	0	0		NaN	0.99175	21.1915	0.000693856	48.527	0	0		NaN	0.998215	27.5574	4.44833e-06	75.669	0	0		NaN	0	0		NaN	0.969183	15.4662	0.00156687	40.025	0.979746	16.9725	0.000291222	56.482	0	0		NaN	0.995405
Q8K4L2;A0A1B0GS91;Q8K4L3	277;364;277	Q8K4L2	Q8K4L2	Supervillin	Svil		0.863181	8.19842	0.000903169	45.879	36.829	45.879	0	0		NaN					0	0		NaN	0.863181	8.19842	0.000903169	45.879	0	0		NaN	0	0		NaN	0	0		NaN	0	0		NaN	0	0		NaN	0
Q8K4L2;A0A1B0GS91;Q8K4L3;E9Q3Z5	296;383;296;269	Q8K4L2	Q8K4L2	Supervillin	Svil		0.872916	8.05327	2.30755e-43	112.36	101.89	63.918	0.662179	0	2.34769e-10	81.144	0.624263	0	5.60217e-06	64.522	0.712679	1.00918	2.30755e-43	112.36	0.721513	1.18923	1.95144e-14	85.737	0.66319	0	1.02205e-09	77.287	0.660967	0	4.71362e-07	71.527	0.69555	5.99792	4.37741e-07	71.853	0.682925	5.69442	2.43236e-20	93.73	0.631459	0	8.60353e-26	98.269	0.333333
Q8K4L2;A0A1B0GS91;Q8K4L3;E9Q3Z5	299;386;299;272	Q8K4L2	Q8K4L2	Supervillin	Svil		0.872916	8.05327	2.08285e-34	106.86	96.723	63.918	0.662179	0	2.34769e-10	87.18	0.624263	0	5.60217e-06	60.317	0.638564	0	4.64524e-07	79.466	0.635828	0	2.25442e-13	80.469	0.66319	0	1.02205e-09	77.287	0.654697	0	5.10874e-06	58.246	0.624262	0	5.60217e-06	60.317	0.664626	0	6.1521e-06	68.034	0.631459	0	8.60353e-26	98.269	0.68847
Q8K4L2;A0A1B0GS91;Q8K4L3;E9Q3Z5	300;387;300;273	Q8K4L2	Q8K4L2	Supervillin	Svil		0.670624	1.89766	2.08285e-34	106.86	96.723	62.663	0.662179	0	2.34769e-10	87.18	0.624263	0	5.60217e-06	60.317	0.638564	0	4.64524e-07	79.466	0.635828	0	2.25442e-13	80.469	0.66319	0	1.02205e-09	77.287	0.654702	0	5.10874e-06	58.246	0.624262	0	5.60217e-06	60.317	0.664626	0	6.1521e-06	68.034	0.631459	0	8.60353e-26	98.269	0.670624
Q8K4L2;A0A1B0GS91;Q8K4L3;E9Q3Z5;F6R6A4;Q8K4L3-3	1375;1462;1375;1261;362;971	Q8K4L2;Q8K4L3-3	Q8K4L2	Supervillin	Svil		1	61.6499	0.00109793	70.1	42.771	61.65	1	70.1001	0.00109793	70.1	1	61.6499	0.00210129	61.65	1	61.6499	0.00210129	61.65	1	70.1001	0.00109793	70.1	1	70.1001	0.00109793	70.1	1	58.6986	0.00205399	58.699	1	61.6499	0.00210129	61.65	1	61.6499	0.00210129	61.65	1	70.1001	0.00109793	70.1	1
Q8K4L2;A0A1B0GS91;Q8K4L3;E9Q3Z5;F6R6A4;Q8K4L3-3	1181;1268;1181;1067;168;777	Q8K4L2;Q8K4L3-3	Q8K4L2	Supervillin	Svil		0.999633	34.4446	2.17766e-116	166.35	153.15	134.85	0.97592	16.092	5.82236e-52	118.47	0.99902	30.1378	2.17769e-66	135.45	0	0		NaN	0.978556	16.6009	2.4005e-72	138.39	0.999633	34.4446	2.64787e-66	134.85	0.9975	26.0476	9.29089e-54	119.56	0.983395	18.3381	3.10293e-51	113.69	0.997148	25.6302	1.7346e-66	136.01	0.988944	19.5189	2.43537e-102	157.03	0.998403
Q8K4L2;A0A1B0GS91;Q8K4L3;E9Q3Z5;Q8K4L3-3	960;1047;960;846;556	Q8K4L2;Q8K4L3-3	Q8K4L2	Supervillin	Svil		0.999996	53.6123	1.1836e-33	100.08	78.617	81.312	0.999984	47.9186	8.07495e-33	95.123	0.999841	37.9842	4.58039e-18	84.602	0.999974	45.8223	5.98043e-18	83.059	0.999996	53.6123	1.04937e-13	81.312	0.999976	46.2389	5.1548e-10	72.805	0.999945	42.5918	1.24486e-14	82.177	0.999987	48.9681	1.17096e-18	87.509	0.999994	52.2657	6.87245e-25	91.238	0.999926	41.3102	5.3631e-18	83.934	0.999989
Q8K4L2;A0A1B0GS91;Q8K4L3;E9Q3Z5;F6R6A4;Q8K4L3-3	1031;1118;1031;917;18;627	Q8K4L2;Q8K4L3-3	Q8K4L2	Supervillin	Svil		1	81.4245	1.66172e-34	139.86	130.08	139.86	0.999999	58.3832	1.7887e-18	111.83	0.99999	49.8828	1.01899e-05	82.069	1	64.369	3.41098e-18	110.44	1	81.4245	1.66172e-34	139.86	0.999989	49.7675	4.63014e-17	105.03	1	65.173	2.55582e-13	99.941	0.999999	60.677	1.32638e-19	113.25	0.999998	56.5545	1.23468e-12	96.135	1	63.1743	5.39726e-06	86.291	0.999996
Q8K4L2;A0A1B0GS91;Q8K4L3;E9Q3Z5;Q8K4L3-3	857;944;857;743;453	Q8K4L2;Q8K4L3-3	Q8K4L2	Supervillin	Svil		0.999993	52.2689	4.27114e-34	120.3	98.931	120.3	0.999984	48.4304	3.23213e-15	99.522	0.991701	21.7677	0.00011653	64.104	0.999894	40.6407	1.41448e-06	78.234	0.999993	52.2689	4.27114e-34	120.3	0.999624	35.0653	7.70351e-10	90.653	0.998665	29.427	9.94423e-06	69.979	0.999938	42.9285	8.32993e-07	84.468	0.995309	23.9555	3.42333e-05	64.507	0.959882	14.581	0.000508982	46.408	0.996503
Q8K4L2;A0A1B0GS91;Q8K4L3	728;815;728	Q8K4L2	Q8K4L2	Supervillin	Svil		0.999823	37.5305	0.00135515	88.495	40.893	70.908	0.998981	29.9145	0.00509124	70.908	0.996183	24.1665	0.00309499	79.148	0.994398	22.4922	0.00695715	63.216	0.992219	21.0557	0.00774147	61.78	0.999113	30.5161	0.00296019	80.231	0.997044	25.2794	0.00135515	88.495	0.998444	28.0726	0.00327992	77.662	0.997341	25.7412	0.00446077	72.928	0.998144	27.3052	0.00270431	82.287	0.999261
Q8K4L2;A0A1B0GS91;Q8K4L3;E9Q3Z5;Q8K4L3-3	233;320;233;233;233	Q8K4L2;Q8K4L3-3	Q8K4L2	Supervillin	Svil		0.761882	5.05116	8.5627e-115	123.43	108.38	90.518													0.5	0	8.5627e-115	123.43	0.499802	0	1.93789e-27	71.052																	0.761882
Q8K4L2;A0A1B0GS91;Q8K4L3;E9Q3Z5;Q8K4L3-3	234;321;234;234;234	Q8K4L2;Q8K4L3-3	Q8K4L2	Supervillin	Svil		0.900897	9.58753	8.5627e-115	123.43	108.38	72.533	0.873675	8.39864	8.45479e-70	106.17	0.704328	3.80241	7.29009e-20	66.479	0.843508	7.3315	2.70151e-39	84.097	0.5	0	8.5627e-115	123.43	0.499802	0	1.93789e-27	71.052	0.900897	9.58753	3.35953e-39	83.022	0.512185	0.211822	4.33543e-70	106.65	0.871456	8.31194	3.37802e-98	113.47	0.814314	6.42114	1.92247e-47	90.518
Q8K4L2;A0A1B0GS91;Q8K4L3;E9Q3Z5;Q8K4L3-3	241;328;241;241;241	Q8K4L2;Q8K4L3-3	Q8K4L2	Supervillin	Svil		0.999201	34.8711	1.42625e-47	91.603	74.665	72.533	0.99637	27.4874	1.29983e-27	72.707	0.991527	24.0253	7.29009e-20	66.479	0.962018	17.1435	7.71373e-14	59.598	0.984128	20.4706	1.29983e-27	72.707	0.991611	21.7118	1.93481e-40	88.191	0.999201	34.8711	2.31489e-28	75.479	0.960713	18.9783	9.11494e-14	58.861	0.993536	21.68	6.45821e-28	74.404	0.986323	20.6707	7.71373e-14	59.598	0.985975
Q8K4L2;A0A1B0GS91;Q8K4L3	603;690;603	Q8K4L2	Q8K4L2	Supervillin	Svil		0.997872	28.8498	0.0401033	52.278	31.975	52.278	0	0		NaN	0.993615	24.1543	0.0401033	41.54	0	0		NaN	0	0		NaN	0	0		NaN	0	0		NaN	0	0		NaN	0	0		NaN	0	0		NaN	0
Q8K4L2;A0A1B0GS91;Q8K4L3;E9Q3Z5;Q8K4L3-3	666;753;666;584;294	Q8K4L2;Q8K4L3-3	Q8K4L2	Supervillin	Svil		0.999765	36.2899	0.000950927	76.064	52.034	74.376	0.999765	36.2899	0.000992529	74.376	0.999743	35.8987	0.00100217	73.985					0.890707	9.11144	0.00690817	47.198	0.982382	17.4632	0.00256376	55.549	0.999732	35.7125	0.000950927	76.064	0.997468	25.954	0.0020692	64.04	0.981462	17.238	0.00203622	57.59	0.986474	18.6291	0.00205851	58.981	0.88342
Q8K4L2;A0A1B0GS91;Q8K4L3;E9Q3Z5;Q8K4L3-3	218;305;218;218;218	Q8K4L2;Q8K4L3-3	Q8K4L2	Supervillin	Svil		1	45.6139	0.00169154	61.344	43.076	45.614	1	45.6139	0.002231	61.344	1	54.4709	0.00305022	54.471	1	54.4709	0.00305022	54.471	1	55.8408	0.00169154	55.841	1	40.5331	0.0160738	40.533	1	56.3592	0.00248675	56.359	1	56.3592	0.00248675	56.359	1	53.5687	0.00331945	53.569	1	46.8438	0.00764462	46.844	1
Q8K4L2;A0A1B0GS91;Q8K4L3;E9Q3Z5;Q8K4L3-3	220;307;220;220;220	Q8K4L2;Q8K4L3-3	Q8K4L2	Supervillin	Svil		1	45.6139	4.64025e-06	85.493	68.607	45.614	1	45.6139	1.38193e-05	81.656	1	54.4709	0.000324109	67.726	1	54.4709	4.45454e-05	73.983	1	55.8408	4.64025e-06	85.493	1	40.5331	4.78661e-05	75.018	1	56.3592	9.08245e-06	82.59	1	56.3592	5.61387e-05	68.481	1	53.5687	0.000202693	62.055	1	46.8438	4.22859e-05	73.279	1
Q8K4L2;A0A1B0GS91;Q8K4L3;E9Q3Z5;Q8K4L3-3	227;314;227;227;227	Q8K4L2;Q8K4L3-3	Q8K4L2	Supervillin	Svil		1	45.6139	1.68088e-25	139.46	95.92	45.614	1	45.6139	2.19304e-11	103.88	1	66.1673	3.15639e-11	96.103	1	71.1164	4.45454e-05	75.479	1	55.8408	4.64025e-06	85.493	1	69.7388	4.78661e-05	79.466	1	77.4124	7.62156e-18	122.42	1	73.5434	4.42656e-12	109.22	1	96.6541	1.68088e-25	139.46	1	68.1022	4.08199e-08	93.959	1
Q8K4L2;A0A1B0GS91;Q8K4L3;E9Q3Z5	508;595;508;481	Q8K4L2	Q8K4L2	Supervillin	Svil		0.908108	8.65923	7.4519e-14	92.039	75.125	48.284	0	0		NaN	0	0		NaN	0	0		NaN	0.870523	8.56643	0.000194142	66.246	0.647359	0.783182	0.000590618	50.284	0.855971	7.74155	7.4519e-14	92.039	0.430836	0	0.000855605	46.481	0	0		NaN	0.64721	0.559811	0.00113876	44.188	0.694426
Q8K4L2;A0A1B0GS91;Q8K4L3;E9Q3Z5	510;597;510;483	Q8K4L2	Q8K4L2	Supervillin	Svil		0.995356	23.4184	9.82361e-75	150.69	137.27	133.71	0.938978	15.2959	9.07626e-11	85.493	0.991631	20.8538	6.25184e-45	121.04	0.991352	20.5944	9.82361e-75	150.69	0.995356	23.4184	6.69398e-52	133.71	0.985355	18.2848	4.38658e-45	122.46	0.986888	18.7669	2.90483e-53	138.02	0.973977	18.1113	3.39349e-39	115.57	0.99097	20.489	6.25184e-45	121.04	0.984009	17.9285	4.73964e-39	113.99	0.986432
Q8K4L2;A0A1B0GS91;Q8K4L3;E9Q3Z5;F6R6A4;Q8K4L3-3	1278;1365;1278;1164;265;874	Q8K4L2;Q8K4L3-3	Q8K4L2	Supervillin	Svil		0.999997	55.3605	2.07586e-69	104.1	98.009	60.209	0.978013	19.1255	2.72165e-48	93.966	0.969895	16.3872	1.20828e-39	86.006					0	0		NaN	0.999997	55.3605	2.51037e-33	79.445	0.670182	5.93329	2.1251e-14	62.237					0.999929	41.4697	2.07586e-69	104.1	0.954824	13.9208	6.10793e-58	99.387	0.999763
Q8K4L2;A0A1B0GS91;Q8K4L3;E9Q3Z5;F6R6A4;Q8K4L3-3	1270;1357;1270;1156;257;866	Q8K4L2;Q8K4L3-3	Q8K4L2	Supervillin	Svil		0.999769	36.3564	1.51494e-39	85.371	74.164	75.378	0	0		NaN					0.398363	0.831127	1.92432e-39	84.524	0.999769	36.3564	0.00369596	75.378	0	0		NaN	0	0		NaN	0	0		NaN									0.376797
A0A1B0GSG5;Q91VI7	487;451	A0A1B0GSG5	A0A1B0GSG5	Ribonuclease inhibitor	Rnh1		1	54.6997	0.00106734	54.7	14.783	54.7					1	54.6997	0.00106734	54.7					0	0		NaN					0	0		NaN	0	0		NaN					0	0		NaN	0
A0A1B0GSI8;Q3TIR3	200;435	A0A1B0GSI8	A0A1B0GSI8	Synembryn-A	Ric8a		0.994364	23.0445	7.93452e-59	101.49	93.207	101.49	0.937473	12.6084	1.56413e-20	71.085	0.604857	2.1018	2.72145e-05	43.31					0.994364	23.0445	7.93452e-59	101.49	0.985911	20.6697	4.86586e-38	89.039	0	0		NaN	0	0		NaN	0.459438	0.379126	1.63706e-05	45.011	0	0		NaN	0.49929
A0A1B0GSX6;O70209	93;93	A0A1B0GSX6	A0A1B0GSX6	PDZ and LIM domain protein 3	Pdlim3		0.998874	29.4791	0.00376447	47.288	37.776	47.288									0	0		NaN									0.998874	29.4791	0.00376447	47.288
A0A1B0GT26;O55003	77;77	A0A1B0GT26	A0A1B0GT26	BCL2/adenovirus E1B 19 kDa protein-interacting protein 3	Bnip3		0.249112	0	1.353e-11	62.274	48.402	62.274	0	0		NaN	0	0		NaN					0	0		NaN	0	0		NaN	0	0		NaN	0	0		NaN	0	0		NaN	0	0		NaN
A0A1B0GT26;O55003	79;79	A0A1B0GT26	A0A1B0GT26	BCL2/adenovirus E1B 19 kDa protein-interacting protein 3	Bnip3		0.958076	13.5893	1.353e-11	62.274	48.402	60.628	0	0		NaN	0	0		NaN					0	0		NaN	0	0		NaN	0	0		NaN	0	0		NaN	0	0		NaN	0	0		NaN	0.958076
A0A1B0GT26;O55003	85;85	A0A1B0GT26	A0A1B0GT26	BCL2/adenovirus E1B 19 kDa protein-interacting protein 3	Bnip3		0.898856	9.45809	2.04901e-47	96.44	84.98	96.44	0.85684	6.89901	1.97438e-24	77.984	0.825185	5.66308	3.22861e-20	69.952	0	0		NaN	0.810957	6.7702	2.63163e-20	71.085	0	0		NaN	0.636438	0.9483	5.75851e-08	56.533	0	0		NaN	0.898856	9.45809	2.04901e-47	96.44	0	0		NaN
A0A1B0GT26;O55003	88;88	A0A1B0GT26	A0A1B0GT26	BCL2/adenovirus E1B 19 kDa protein-interacting protein 3	Bnip3		0.993192	19.5151	2.04901e-47	96.44	84.98	69.092	0.811338	5.55874	1.97438e-24	77.984	0.753636	4.17645	3.22861e-20	69.952	0.969909	12.9135	5.47382e-20	70.213	0.947921	12.3629	2.63163e-20	71.085	0.955909	11.5554	1.12378e-05	50.562	0.815751	6.59044	2.25077e-05	71.241	0.993192	19.5151	5.42862e-17	69.092	0.946161	12.0751	2.04901e-47	96.44	0.978586	18.2269	1.37956e-05	49.445	0.952628
A0A1B0GT26;O55003	48;48	A0A1B0GT26	A0A1B0GT26	BCL2/adenovirus E1B 19 kDa protein-interacting protein 3	Bnip3		0.25	0	0.000379065	49.049	15.741	49.049					0	0		NaN	0	0		NaN	0.25	0	0.000379065	49.049	0	0		NaN	0	0		NaN	0	0		NaN	0	0		NaN	0	0		NaN
A0A1B0GT26;O55003	51;51	A0A1B0GT26	A0A1B0GT26	BCL2/adenovirus E1B 19 kDa protein-interacting protein 3	Bnip3		0.25	0	0.000379065	49.049	15.741	49.049					0	0		NaN	0	0		NaN	0.25	0	0.000379065	49.049	0	0		NaN	0	0		NaN	0	0		NaN	0	0		NaN	0	0		NaN
A0A1B0GT26;O55003	52;52	A0A1B0GT26	A0A1B0GT26	BCL2/adenovirus E1B 19 kDa protein-interacting protein 3	Bnip3		0.25	0	0.000379065	49.049	15.741	49.049					0	0		NaN	0	0		NaN	0.25	0	0.000379065	49.049	0	0		NaN	0	0		NaN	0	0		NaN	0	0		NaN	0	0		NaN
A0A1B0GT26;O55003	53;53	A0A1B0GT26	A0A1B0GT26	BCL2/adenovirus E1B 19 kDa protein-interacting protein 3	Bnip3		0.25	0	0.000379065	49.049	15.741	49.049					0	0		NaN	0	0		NaN	0.25	0	0.000379065	49.049	0	0		NaN	0	0		NaN	0	0		NaN	0	0		NaN	0	0		NaN
A0A1B0GT92;Q9Z1E4	577;641	A0A1B0GT92	A0A1B0GT92	Glycogen [starch] synthase, muscle	Gys1		0.999235	34.9869	6.63295e-05	78.324	62.443	43.03	0.997218	25.9161	0.000118715	69.729	0	0		NaN	0.988777	23.3814	0.00056068	52.522	0.999235	34.9869	0.000291423	50.957	0	0		NaN	0	0		NaN	0	0		NaN	0.915294	14.2981	0.0219885	44.616	0	0		NaN	0.989012
A0A1B0GT92;Q9Z1E4	581;645	A0A1B0GT92	A0A1B0GT92	Glycogen [starch] synthase, muscle	Gys1		0.995104	26.0982	8.66933e-13	107.85	75.006	102.62	0.962879	16.9807	8.66933e-13	107.85	0.876436	11.5197	9.63699e-12	93.959	0.945634	15.8363	4.78639e-12	97.214	0.995104	26.0982	4.09569e-12	102.62	0.830256	9.90447	1.76235e-12	106.01	0.660666	4.82114	4.72872e-09	94.122	0.824515	9.72993	4.50827e-12	95.018	0.816103	9.41208	1.4284e-12	106.49	0.82209	9.65753	5.82984e-06	86.313	0.964956
A0A1B0GT92;Q9Z1E4	583;647	A0A1B0GT92	A0A1B0GT92	Glycogen [starch] synthase, muscle	Gys1		0.75896	6.88835	0.000479349	60.49	48.642	51.695	0.582365	1.37246	0.00278172	47.288	0.332883	0	0.00275697	54.471	0.702072	5.59676	0.00141827	52.522	0	0		NaN	0.33328	0	0.00143868	51.286	0	0		NaN	0	0		NaN	0.42421	0	0.0012315	57.164	0	0		NaN	0.75896
A0A1B0GT92;Q9Z1E4	585;649	A0A1B0GT92	A0A1B0GT92	Glycogen [starch] synthase, muscle	Gys1		0.33328	0	0.00143868	54.471	14.469	51.286	0	0		NaN	0.332883	0	0.00275697	54.471	0	0		NaN	0	0		NaN	0.33328	0	0.00143868	51.286	0	0		NaN	0	0		NaN	0	0		NaN	0	0		NaN	0
A0A1B0GT92;Q9Z1E4	645;709	A0A1B0GT92	A0A1B0GT92	Glycogen [starch] synthase, muscle	Gys1		0.547995	0.892104	4.95034e-33	73.24	66.945	73.24	0.491866	0.647653	8.19173e-18	57.832	0.520548	0.628062	4.57168e-13	56.547	0.358758	0	6.0358e-10	51.025	0.547995	0.892104	4.95034e-33	73.24	0.412978	0	8.4832e-09	49.793	0.48031	0.592312	1.68096e-09	50.942	0	0		NaN	0.343076	0.583123	5.18589e-09	50.35	0.469419	0	1.825e-19	63.331	0.30852
A0A1B0GT92;Q9Z1E4	647;711	A0A1B0GT92	A0A1B0GT92	Glycogen [starch] synthase, muscle	Gys1		0.469419	0	1.825e-19	63.331	56.193	63.331	0.384715	0	6.04585e-10	51.193	0	0		NaN	0.358758	0	6.0358e-10	51.025	0.12319	0	2.97973e-08	49.606	0.412978	0	8.4832e-09	49.793	0	0		NaN	0	0		NaN	0.238585	0	1.47074e-06	43.554	0.469419	0	1.825e-19	63.331	0.398139
A0A1B0GT92;Q9Z1E4	653;717	A0A1B0GT92	A0A1B0GT92	Glycogen [starch] synthase, muscle	Gys1		0.253364	0	6.04585e-10	51.193	41.91	43.554	0.123287	0	6.04585e-10	51.193	0	0		NaN	0.122793	0	1.2011e-05	41.912	0.12319	0	2.97973e-08	49.606	0	0		NaN	0	0		NaN	0	0		NaN	0.253364	0	1.47074e-06	43.554	0	0		NaN	0
A0A1B0GT92;Q9Z1E4	654;718	A0A1B0GT92	A0A1B0GT92	Glycogen [starch] synthase, muscle	Gys1		0.253378	0	6.04585e-10	51.193	41.91	43.554	0.123287	0	6.04585e-10	51.193	0	0		NaN	0.122793	0	1.2011e-05	41.912	0.12319	0	2.97973e-08	49.606	0	0		NaN	0	0		NaN	0	0		NaN	0.253378	0	1.47074e-06	43.554	0	0		NaN	0
A0A1B0GT92;Q9Z1E4	655;719	A0A1B0GT92	A0A1B0GT92	Glycogen [starch] synthase, muscle	Gys1		0.253393	0	6.04585e-10	51.193	41.91	43.554	0.123287	0	6.04585e-10	51.193	0	0		NaN	0.122793	0	1.2011e-05	41.912	0.12319	0	2.97973e-08	49.606	0	0		NaN	0	0		NaN	0	0		NaN	0.253393	0	1.47074e-06	43.554	0	0		NaN	0
A0A1B0GT92;Q9Z1E4	657;721	A0A1B0GT92	A0A1B0GT92	Glycogen [starch] synthase, muscle	Gys1		0.25343	0	6.04585e-10	51.193	41.91	43.554	0.123287	0	6.04585e-10	51.193	0	0		NaN	0.122793	0	1.2011e-05	41.912	0.12319	0	2.97973e-08	49.606	0	0		NaN	0	0		NaN	0	0		NaN	0.25343	0	1.47074e-06	43.554	0	0		NaN	0
A0A1B0GT92;Q9Z1E4	664;728	A0A1B0GT92	A0A1B0GT92	Glycogen [starch] synthase, muscle	Gys1		0.862433	10.952	1.99219e-50	83.998	77.837	68.092	0.572216	6.49286	5.46632e-08	50.393	0	0		NaN	0.768689	6.95392	1.99219e-50	83.998	0.838619	9.86947	7.09189e-13	54.691	0	0		NaN	0.798809	9.45423	3.92362e-13	55.919	0	0		NaN	0.708016	7.89367	1.81226e-08	45.192	0.862433	10.952	2.91175e-25	68.092	0.624818
A0A1B0GT92;Q9Z1E4	6;6	A0A1B0GT92	A0A1B0GT92	Glycogen [starch] synthase, muscle	Gys1		0.464554	0	4.02029e-08	42.269	32.888	42.269	0.464554	0	4.02029e-08	42.269
A0A1B0GT92;Q9Z1E4	8;8	A0A1B0GT92	A0A1B0GT92	Glycogen [starch] synthase, muscle	Gys1		0.464554	0	4.02029e-08	42.269	32.888	42.269	0.464554	0	4.02029e-08	42.269
A0A1B0GX25;Q9Z2V5	909;909	A0A1B0GX25	A0A1B0GX25	Histone deacetylase 6	Hdac6		0.876165	8.49742	4.12289e-40	132.97	107.58	124.3	0.5	0	0.00321419	40.725									0.825393	6.746	1.17444e-29	116.19	0.869339	8.23044	2.39417e-15	97.86	0.843093	7.30234	1.20124e-10	92.856	0.876165	8.49742	4.04601e-35	124.3	0.621984	2.16269	2.65575e-05	71.879					0.829435
A0A1B0GX25;Q9Z2V5	910;910	A0A1B0GX25	A0A1B0GX25	Histone deacetylase 6	Hdac6		0.576754	1.34398	0.000176095	62.14	45.916	52.555	0.5	0	0.00321419	40.725	0.576754	1.34398	0.000634926	52.555
A0A1B0GX25;Q9Z2V5;B1AUA8	42;42;42	A0A1B0GX25	A0A1B0GX25	Histone deacetylase 6	Hdac6		0.5	0	0.000492662	47.621	38.085	47.621	0.5	0	0.00226468	44.425					0	0		NaN	0	0		NaN	0	0		NaN					0	0		NaN	0.5	0	0.00226468	46.481	0	0		NaN	0.5
A0A1B0GX25;Q9Z2V5;B1AUA8	43;43;43	A0A1B0GX25	A0A1B0GX25	Histone deacetylase 6	Hdac6		0.5	0	0.000492662	47.621	38.085	47.621	0.5	0	0.00226468	44.425					0	0		NaN	0	0		NaN	0	0		NaN					0	0		NaN	0.5	0	0.00226468	46.481	0	0		NaN	0.5
A0A1C7CYU3;Q02819;A0A1B0GR41	368;368;235	A0A1C7CYU3	A0A1C7CYU3	Nucleobindin-1	Nucb1		0.999997	55.4522	1.01751e-21	114.31	96.908	102.38	0.999551	33.4784	1.58733e-05	78.285	0.999908	40.3679	1.26862e-13	98.439	0.995722	23.6694	0.000177646	59.862	0.999997	55.4522	1.88043e-17	102.38	0.99609	24.0607	2.92282e-05	68.257	0.997312	25.6939	1.95693e-05	69.485	0.999376	32.0432	2.02912e-05	76.85	0.999971	45.3376	1.01751e-21	114.31	0.999672	34.8456	1.13e-05	79.771	0.99321
A0A1C7CYU3;Q02819;A0A1B0GT83;A0A1B0GR92	85;85;85;85	A0A1C7CYU3	A0A1C7CYU3	Nucleobindin-1	Nucb1		0.996491	24.573	2.80862e-08	80.238	76.203	69.361	0.984474	18.0235	1.30507e-05	70.837	0.954177	13.1881	6.86912e-05	57.482	0.783202	5.58161	0.000220513	48.229									0.996491	24.573	2.02581e-05	69.361	0.965235	14.4361	5.4278e-05	65.784									0.988203
F8WHJ1;J3QP99;A0A1C7CYU5;Q3U2I3-2;Q3U2I3;Q3U2I3-3	834;900;914;834;900;716	F8WHJ1	F8WHJ1	FTS and Hook-interacting protein	Fam160a2		0.884851	9.25461	3.63468e-13	69.148	46.615	69.125	0.884851	9.25461	3.73604e-13	69.125	0.476108	0	8.43676e-05	49.627					0.841325	7.49963	3.63468e-13	69.148	0	0		NaN	0	0		NaN
F8WHJ1;J3QP99;A0A1C7CYU5;Q3U2I3-2;Q3U2I3;Q3U2I3-3	510;510;524;510;510;524	F8WHJ1	F8WHJ1	FTS and Hook-interacting protein	Fam160a2		0.999192	31.312	0.000190447	66.004	48.185	66.004	0.981584	17.6646	0.00019707	65.805	0	0		NaN	0.932108	11.4259	0.000258126	58.172	0	0		NaN					0.993035	22.5119	0.000632893	49.298	0.995563	23.8245	0.000632893	49.298	0.905294	12.8144	0.00069863	48.467					0.999192
F8WHJ1;J3QP99;A0A1C7CYU5;Q3U2I3-2;Q3U2I3;Q3U2I3-3	797;863;877;797;863;679	F8WHJ1	F8WHJ1	FTS and Hook-interacting protein	Fam160a2		1	60.2551	2.89724e-08	89.541	61.679	60.255	1	62.4075	0.000157858	64.394	1	60.2551	0.000601217	60.255	1	57.8361	0.00298724	57.836	0.5	0	4.0849e-05	70.529	0	0		NaN					0	0		NaN	1	63.4082	0.000277168	63.408	1	41.2833	0.0287805	41.283	1
F8WHJ1;J3QP99;A0A1C7CYU5;Q3U2I3-2;Q3U2I3	596;596;610;596;596	F8WHJ1	F8WHJ1	FTS and Hook-interacting protein	Fam160a2		1	51.2862	0.00019868	62.162	42.503	51.286									0	0		NaN	0	0		NaN	0	0		NaN	1	51.2862	0.000835651	51.286	0	0		NaN									1
F8WHJ1;J3QP99;A0A1C7CYU5;Q3U2I3-2;Q3U2I3;Q3U2I3-3	529;529;543;529;529;543	F8WHJ1	F8WHJ1	FTS and Hook-interacting protein	Fam160a2		0.608619	5.74569	0.0146819	52.527	20.767	50.04	0	0		NaN	0	0		NaN	0	0		NaN	0.608619	5.74569	0.0208633	50.04	0	0		NaN	0	0		NaN	0.595851	5.48979	0.0146819	52.527					0	0		NaN	0
F8WHJ1;J3QP99;A0A1C7CYU5;Q3U2I3-2;Q3U2I3;Q3U2I3-3	793;859;873;793;859;675	F8WHJ1	F8WHJ1	FTS and Hook-interacting protein	Fam160a2		0.585695	1.50352	2.89724e-08	89.541	61.679	58.831	0.5	0	0.000157858	64.394	0.5	0	0.000601217	55.885	0.585695	1.50352	0.000395666	58.831	0.5	0	4.0849e-05	70.529	0	0		NaN					0	0		NaN	0.5	0	0.000277168	61.409	0	0		NaN	0.5
A0A1C7CYV0;B1AX58;Q99K51	339;348;339	A0A1C7CYV0	A0A1C7CYV0	Plastin-3	Pls3		1	42.0307	2.08437e-10	77.185	59.048	42.031	1	44.2994	0.0153173	44.299	0	0		NaN	0	0		NaN	1	77.1846	2.08437e-10	77.185	0	0		NaN	0	0		NaN	0	0		NaN	0	0		NaN	1	42.8094	0.019505	42.809
A0A1D5RL92;G5E8I8;Q8CGZ0	826;837;824	A0A1D5RL92	A0A1D5RL92	Calcium homeostasis endoplasmic reticulum protein	Cherp		0.520598	0	8.13445e-05	41.76	34.314	41.76	0	0		NaN					0	0		NaN	0.520598	0	8.13445e-05	41.76					0	0		NaN					0	0		NaN	0	0		NaN
A0A1D5RL92;G5E8I8;Q8CGZ0	828;839;826	A0A1D5RL92	A0A1D5RL92	Calcium homeostasis endoplasmic reticulum protein	Cherp		0.520653	0	8.13445e-05	41.76	34.314	41.76	0	0		NaN					0	0		NaN	0.520653	0	8.13445e-05	41.76					0	0		NaN					0	0		NaN	0	0		NaN
A0A1D5RL92;G5E8I8;Q8CGZ0	833;844;831	A0A1D5RL92	A0A1D5RL92	Calcium homeostasis endoplasmic reticulum protein	Cherp		0.520813	0	8.13445e-05	41.76	34.314	41.76	0	0		NaN					0	0		NaN	0.520813	0	8.13445e-05	41.76					0	0		NaN					0	0		NaN	0	0		NaN
A0A1D5RL92;G5E8I8;Q8CGZ0	839;850;837	A0A1D5RL92	A0A1D5RL92	Calcium homeostasis endoplasmic reticulum protein	Cherp		0.891499	8.33511	8.13445e-05	41.76	34.314	41.76	0	0		NaN					0	0		NaN	0.891499	8.33511	8.13445e-05	41.76					0	0		NaN					0	0		NaN	0	0		NaN
A0A1D5RLB2	28	A0A1D5RLB2	A0A1D5RLB2				0.384183	0.96678	1.32543e-10	57.496	50.847	57.496	0.32905	0	1.61934e-05	40.428					0.384183	0.96678	1.32543e-10	57.496													0.332344	0	3.75136e-06	49.618									0.332375
A0A1D5RLB2	29	A0A1D5RLB2	A0A1D5RLB2				0.489254	0	2.33241e-11	62.605	54.11	62.605	0.32905	0	1.61934e-05	40.428									0.489254	0	2.33241e-11	62.605									0.332344	0	3.75136e-06	49.618									0.332375
A0A1D5RLB2	30	A0A1D5RLB2	A0A1D5RLB2				0.664584	6.05102	2.33241e-11	62.605	54.11	41.087	0.32905	0	1.61934e-05	40.428									0.489254	0	2.33241e-11	62.605									0.332344	0	3.75136e-06	49.618	0.606756	5.04576	6.59662e-06	48.286	0.664584	6.05102	1.5819e-05	41.087	0.332375
E9QKV6;A0A1D5RLD1;E9PWZ6;E9PZW8;A0A1D5RLW4;Q9QY06-3;Q9QY06;Q9QY06-2	1264;1265;1275;1275;73;1264;1264;1293	E9QKV6	E9QKV6	Unconventional myosin-IXb	Myo9b		0.985918	19.6124	5.72143e-11	85.808	72.578	64.2									0	0		NaN	0.985918	19.6124	6.93422e-05	64.2					0	0		NaN					0	0		NaN					0.97706
E9QKV6;A0A1D5RLD1;E9PWZ6;E9PZW8;A0A1D5RLW4;Q9QY06-3;Q9QY06;Q9QY06-2	1218;1219;1218;1218;27;1218;1218;1247	E9QKV6	E9QKV6	Unconventional myosin-IXb	Myo9b		0.589176	6.66056	1.49667e-05	43.888	36.936	43.888													0	0		NaN																	0.589176	6.66056	1.49667e-05	43.888
E9QKV6;A0A1D5RLD1;E9PWZ6;E9PZW8;Q9QY06-3;Q9QY06;Q9QY06-2	1175;1176;1175;1175;1175;1175;1204	E9QKV6	E9QKV6	Unconventional myosin-IXb	Myo9b		0.997705	27.1766	0.000272664	45.094	40.463	45.094
E9QKV6;A0A1D5RLD1;E9PWZ6;E9PZW8;A0A1D5RLW4	1325;1326;1336;1336;134	E9QKV6	E9QKV6		Myo9b		0.926037	15.7479	1.06645e-07	91.961	52.337	68.44					0	0		NaN	0	0		NaN	0.91149	14.8988	1.06645e-07	91.961					0	0		NaN					0	0		NaN	0	0		NaN	0
A0A1D5RLF1;Q8BGH4	152;152	A0A1D5RLF1	A0A1D5RLF1	Receptor expression-enhancing protein 1	Reep1		0.999995	52.6311	5.43266e-21	133.32	71.886	133.32	0.99995	44.7871	1.32396e-14	116.24	0.999994	52.1066	3.19182e-18	125.54	0.999569	33.6533	1.08992e-11	107.09	0.999994	52.1066	3.19182e-18	125.54	0.999362	31.9537	3.18901e-11	104.24	0.999995	52.6311	5.43266e-21	133.32	0.999988	49.1718	2.10253e-18	126.76	0.999958	43.8104	5.54061e-12	110.08	0.99796	26.8949	5.54061e-12	110.08	0.999981
A0A1D5RLG3;Q80UJ7	538;538	A0A1D5RLG3	A0A1D5RLG3	Rab3 GTPase-activating protein catalytic subunit	Rab3gap1		0.277247	1.7226	2.63684e-05	58.674	48.064	58.674																									0	0		NaN	0	0		NaN	0.277247	1.7226	2.63684e-05	58.674
A0A1D5RLJ8;D3Z1F9;Q8C0M0-2;Q8C0M0;Q8C0M0-3	838;840;821;839;840	A0A1D5RLJ8	A0A1D5RLJ8	WD repeat-containing protein 59	Wdr59		0.682546	3.32463	2.43405e-10	80.142	72.823	80.142	0.499689	0	3.65924e-06	55.588	0.682546	3.32463	2.43405e-10	80.142	0	0		NaN
A0A1D5RLJ8;D3Z1F9;Q8C0M0-2;Q8C0M0;Q8C0M0-3	839;841;822;840;841	A0A1D5RLJ8	A0A1D5RLJ8	WD repeat-containing protein 59	Wdr59		0.791928	5.80986	2.7717e-06	65.16	50.905	64.522	0.499689	0	3.65924e-06	55.588					0	0		NaN													0.754994	4.91483	1.57726e-05	48.968									0.742444
E9PUC5;F6Z9E6;A0A1D5RLK2;A0A1D5RMH7;Q2PFD7-3;Q2PFD7-4;Q2PFD7-5;Q2PFD7-2;Q2PFD7	339;968;998;1252;481;952;967;999;1000	E9PUC5	E9PUC5	PH and SEC7 domain-containing protein 3	Psd3		0.852186	8.8161	1.17406e-05	58.712	45.049	48.053	0.747443	6.92223	5.15034e-05	54.582	0.691157	8.16924	0.000253686	44.807	0	0		NaN	0	0		NaN	0.807201	7.74792	0.000193851	46.663	0.540193	5.11838	0.00019937	41.711	0.852186	8.8161	0.000151491	48.053	0.732703	5.74859	0.000105411	49.343	0.719025	7.24111	0.000174639	46.926	0.793772
E9PUC5;F6Z9E6;A0A1D5RLK2;A0A1D5RMH7;Q2PFD7-3;Q2PFD7-4;Q2PFD7-5;Q2PFD7-2;Q2PFD7	340;969;999;1253;482;953;968;1000;1001	E9PUC5	E9PUC5	PH and SEC7 domain-containing protein 3	Psd3		0.489612	0.729174	9.04653e-06	66.152	57.422	66.152	0.489612	0.729174	2.15507e-05	66.152	0	0		NaN	0	0		NaN	0.36625	0.500322	0.000203024	41.615	0	0		NaN	0	0		NaN					0.40131	0.645749	9.04653e-06	60.621	0	0		NaN	0
E9PUC5;F6Z9E6;A0A1D5RLK2;A0A1D5RMH7;Q2PFD7-3;Q2PFD7-4;Q2PFD7-5;Q2PFD7-2;Q2PFD7	342;971;1001;1255;484;955;970;1002;1003	E9PUC5	E9PUC5	PH and SEC7 domain-containing protein 3	Psd3		0.330109	0.548806	6.82685e-05	45.618	41	45.618					0	0		NaN	0	0		NaN	0	0		NaN	0	0		NaN	0	0		NaN					0	0		NaN	0	0		NaN	0.330109
E9PUC5;F6Z9E6;A0A1D5RLK2;A0A1D5RMH7;Q2PFD7-3;Q2PFD7-4;Q2PFD7-5;Q2PFD7-2;Q2PFD7	348;977;1007;1261;490;961;976;1008;1009	E9PUC5	E9PUC5	PH and SEC7 domain-containing protein 3	Psd3		0.960122	13.9668	2.15507e-05	66.152	57.422	66.152	0.960122	13.9668	2.15507e-05	66.152	0	0		NaN	0	0		NaN	0	0		NaN	0.949231	13.6823	0.000193851	46.663	0	0		NaN	0.958098	15.8723	0.000151491	48.053	0.873284	9.23823	0.000830421	40.349	0	0		NaN	0.948229
E9QNK5;Q3UQP0;A0A1D5RLK7;Q60748;P35347;Q60748-2	391;411;412;392;396;412	E9QNK5	E9QNK5	Corticotropin-releasing factor receptor 2;Corticotropin-releasing factor receptor 1	Crhr2;Crhr1		0.999955	45.4624	0.00103466	61.344	49.613	61.344	0.999941	44.7602	0.00103466	57.348					0.999955	45.4624	0.00109787	61.344	0.999877	41.4495	0.00265643	51.998	0	0		NaN	0	0		NaN	0	0		NaN	0	0		NaN	0	0		NaN
[truncated: 11,503 more rows]
[truncated: 109 more columns]

## Sheet: b. Modulated Phospho-Sites
b. List of all IF-responsive phosphorylation sites in heart tissues
[truncated: 7,616 more rows]
